# Supplementary material for: MDM4 Is Targeted by 1q Gain and Drives Disease in Burkitt Lymphoma
Source: Oxford University Press journal article supplement (doi:10.1158/0008-5472.can-18-3438), 2019-04-18
Supplement: 00085472can183438-sup-211452_2_supp_5441213_ppf4kv.xlsx [file 00085472can183438-sup-211452_2_supp_5441213_ppf4kv.xlsx]

## Sheet: Sheet1
Supplementary Table 2. Gene scores from the RNAi screens.
Gene	BL_vs_non-blood_gene_score	BL_vs_non-blood_gene_rank	BL_vs_non-blood_pvalue	BL_vs_blood_gene_score	BL_vs_blood_gene_rank	BL_vs_blood_pvalue	blood_vs_non-blood_gene_score	blood_vs_non-blood_gene_rank	blood_vs_non-blood_pvalue	DDX3X_mut_vs_wt_gene_score	DDX3X_mut_vs_wt_gene_rank	DDX3X_mut_vs_wt_pvalue	FOXO1_mut_vs_wt_gene_score	FOXO1_mut_vs_wt_gene_rank	FOXO1_mut_vs_wt_pvalue	GNA13_mut_vs_wt_gene_score	GNA13_mut_vs_wt_gene_rank	GNA13_mut_vs_wt_pvalue	MYD88_mut_vs_wt_gene_score	MYD88_mut_vs_wt_gene_rank	MYD88_mut_vs_wt_pvalue	TCF3_mut_vs_wt_gene_score	TCF3_mut_vs_wt_gene_rank	TCF3_mut_vs_wt_pvalue	TP53_mut_vs_wt_gene_score	TP53_mut_vs_wt_gene_rank	TP53_mut_vs_wt_pvalue	weighted_z_score_BJAB	weighted_z_score_BL60	weighted_z_score_Raji	weighted_z_score_Ramos	weighted_z_score_BL2	weighted_z_score_LY47	weighted_z_score_Salina	weighted_z_score_Seraphine
A1BG	-1.54	4783	0.978	0.9646	1709	0.317	-1.3	4484	0.908	1.05	1255	0.2372	1.22	674	0.1292	-0.6488	3146	0.6337	1.4	329	0.055	0.9714	1549	0.2863	-0.7957	2451	0.4731	-0.559018	-0.121407	-0.894098	-0.581485	-1.40074	0.203299	-0.167371	0.096233
A2M	-1.44	4649	0.958	-0.6439	3196	0.636	-1.23	4283	0.874	-1.26	4503	0.9033	0.7524	2005	0.3949	0.9971	1482	0.2906	-0.9206	3367	0.679	-1.58	4950	0.983	-1.02	3425	0.693	1.48388	0.895992	0.508141	1.88743	1.65423	1.47641	1.67953	0.870164
A4GALT	-0.8835	3654	0.744	-0.8583	3689	0.748	-0.9942	3608	0.731	-0.6135	3033	0.6085	0.918	1494	0.2975	0.7231	2342	0.4795	1.42	293	0.051	-0.683	3130	0.6321	0.6129	1558	0.3064	0.881796	0.781325	0.758035	0.384523	-0.551314	0.523589	0.918243	-0.250228
A4GNT	1.44	273	0.038	-0.9536	3913	0.81	1.82	17	0.001	0.4609	2825	0.5612	-0.9534	3678	0.7423	-0.6126	3058	0.6178	0.5909	2056	0.404	0.8744	1852	0.3553	0.7062	1394	0.2491	-0.795954	-0.459548	0.556652	-1.01919	-0.604064	-0.17211	-0.121556	-0.234441
AACS	1.09	1294	0.218	1.02	1527	0.277	0.7495	1857	0.347	1.36	324	0.0573	-1.07	4007	0.8058	-0.5836	2997	0.6103	1.22	641	0.115	1.22	727	0.1335	0.9763	768	0.1504	-0.316264	-0.774771	-0.356706	-0.615809	-0.794818	-0.621054	-1.53355	-0.057834
AADAC	0.6274	2664	0.518	1.34	457	0.068	-1.24	4312	0.879	1.18	838	0.16	0.7311	2076	0.4074	-0.6299	3096	0.6275	-0.5756	2391	0.481	0.7358	2266	0.4441	0.7628	1251	0.2477	-0.202849	-0.140414	0.110406	-0.138706	-0.720615	-1.15901	-0.624261	0.021967
AADAT	1.38	420	0.057	1.2	910	0.144	-0.7117	2808	0.551	-1.02	4033	0.8149	0.9504	1399	0.277	1.21	725	0.1416	-0.8629	3155	0.637	0.5651	2662	0.5294	-0.9849	3235	0.655	1.23152	1.13493	1.14125	0.794489	1.01498	1.51681	1.43255	1.7731
AANAT	-0.8478	3575	0.73	-0.8151	3579	0.732	-1.04	3743	0.765	0.8975	1793	0.3402	1.01	1234	0.2299	-0.6323	3102	0.6264	1.33	424	0.074	1.16	924	0.1698	-0.6536	1968	0.3716	1.45655	0.3373	0.470014	0.855408	0.39084	1.51496	0.778087	0.973528
AARS	-0.7747	3400	0.68	-1.02	4055	0.829	0.5945	2206	0.422	0.9704	1532	0.3041	-1.19	4279	0.863	-0.7371	3345	0.6724	-0.9244	3380	0.682	-0.7321	3259	0.6542	-1.01	3366	0.6944	-0.071721	0.669317	1.04848	0.863027	0.697906	0.590812	1.04667	0.69073
AARS2	-0.9329	3784	0.772	-0.8016	3538	0.717	1.24	653	0.108	-1.01	3997	0.8078	-0.6866	2948	0.594	0.8279	2008	0.408	-1.45	4849	0.969	-0.7223	3238	0.6529	-1.41	4823	0.9592	1.23897	0.728569	0.987857	0.951149	1.789	1.51348	1.43255	1.98472
AASDH	0.5821	2747	0.537	1.16	1031	0.177	-1.05	3772	0.763	0.7471	2275	0.4523	-0.7163	3022	0.6094	1.16	912	0.1758	-0.4974	2302	0.46	-0.9452	3816	0.7688	-0.8834	2807	0.5629	-1.3797	-1.6164	-1.46518	-0.617062	-1.09861	-0.192612	-1.13056	-0.553362
AASDHPPT	1.8	6	0	1.55	110	0.015	-0.8238	3112	0.622	0.9362	1652	0.313	0.6149	2341	0.4619	-1.03	4106	0.8243	0.7411	1725	0.334	-0.6748	3113	0.6248	1.39	236	0.037	-1.02013	-0.532535	-0.53031	-0.452226	-1.11275	-0.386653	-0.270363	-0.945302
AASS	-0.7373	3321	0.667	-0.6542	3216	0.649	-0.7824	2987	0.598	1.05	1256	0.2457	-0.9296	3610	0.7319	-0.5398	2952	0.5968	0.5353	2150	0.434	-0.7926	3411	0.6874	-1.18	4111	0.8271	-0.455535	-0.250607	-0.218352	0.042967	-0.416692	0.098186	0.241489	0.243479
ABAT	-0.5744	3003	0.59	-0.9781	3968	0.81	1.03	1097	0.195	1.11	1037	0.2014	0.8513	1743	0.3356	0.8635	1926	0.3812	1.51	178	0.028	0.4415	2774	0.5549	-1.22	4251	0.8556	-0.354215	-0.938692	-1.32319	-0.523335	-1.28175	-0.196214	0.48525	-0.307149
ABCA1	1.01	1558	0.267	1.53	143	0.019	-1.06	3812	0.778	1.44	182	0.0393	1.47	181	0.0354	1.33	403	0.0822	1.03	1028	0.18	1.59	61	0.0114	-1.25	4390	0.8706	-0.576036	-0.686409	-0.738541	-1.46076	-1.26895	1.05191	-0.736073	-0.397558
ABCA10	1.18	965	0.152	-1.54	4812	0.976	1.57	127	0.016	1.33	396	0.07	0.8339	1780	0.3471	0.595	2686	0.5447	1.33	426	0.075	1.04	1337	0.2514	-0.8446	2644	0.5273	0.687814	0.364202	-0.339255	0.838952	-0.106025	0.805748	0.719592	0.737759
ABCA12	-0.7055	3251	0.651	-0.6052	3135	0.632	0.7962	1729	0.32	1.31	452	0.0819	0.5728	2416	0.4851	1.27	532	0.1051	1.25	571	0.101	0.6008	2598	0.5146	-1.2	4199	0.8436	1.01401	0.636439	0.368865	-0.112405	0.243465	1.35593	1.02157	-0.020984
ABCA13	0.9864	1649	0.283	1.18	970	0.169	1.15	842	0.142	-1.07	4134	0.8363	1.68	28	0.0054	-0.5191	2926	0.5917	0.8732	1380	0.263	1.2	777	0.1428	-0.7351	2232	0.4255	0.949425	0.516676	0.456775	0.855074	0.086298	0.793772	0.686611	0.393795
ABCA2	1.48	212	0.025	1.21	859	0.138	-1.11	3967	0.8	0.8212	2035	0.4029	0.6301	2309	0.4619	-1.11	4277	0.854	0.9875	1119	0.214	-1.11	4185	0.8456	-1.17	4061	0.8184	0.164598	-0.422864	-0.209089	1.01448	-0.066907	0.767791	-0.46959	-0.369377
ABCA3	0.853	2056	0.385	-0.9172	3831	0.791	1.29	546	0.088	1.33	411	0.0803	-0.6154	2787	0.5493	0.6306	2603	0.5273	0.5536	2128	0.415	0.4459	2772	0.5578	-1.29	4524	0.8944	-1.45657	-0.499048	-0.389197	0.214826	-0.28049	0.475915	0.003841	-0.18932
ABCA4	0.6383	2642	0.513	0.9382	1802	0.337	-1.02	3675	0.742	-1.58	4947	0.9819	-0.765	3164	0.6345	-0.991	4013	0.8074	-1.48	4885	0.975	-0.8076	3442	0.6966	1.08	591	0.1146	0.947239	0.428877	-0.531158	0.164009	0.71808	-0.296214	-0.131286	0.075526
ABCA5	1.28	687	0.105	1.26	673	0.116	-1.02	3698	0.754	0.7488	2270	0.4439	-0.8852	3475	0.7013	0.7892	2135	0.4302	-0.8595	3143	0.628	-1.08	4124	0.8389	-1.27	4428	0.8782	0.561591	0.756386	-0.175405	1.27704	1.0927	-0.0657	1.4064	0.986603
ABCA6	0.8518	2059	0.385	1.1	1236	0.216	-0.8969	3331	0.67	0.7762	2175	0.4331	-0.5637	2696	0.54	1.19	814	0.1569	-1.03	3749	0.746	0.6468	2489	0.4925	-1.22	4261	0.8571	0.636234	-0.030634	-0.249563	-0.489067	0.157805	0.35853	0.626769	0.288604
ABCA7	1.11	1252	0.207	1.08	1322	0.232	0.7363	1890	0.353	-1.25	4489	0.9	-0.5901	2745	0.5489	-0.9494	3904	0.7883	-1.26	4472	0.894	0.6497	2480	0.4913	-0.9106	2927	0.5866	1.28403	0.826289	1.14012	1.35548	1.57236	1.04703	1.00636	0.582053
ABCA8	-0.9579	3825	0.784	-0.9144	3822	0.779	0.8857	1491	0.269	1.07	1185	0.2328	0.6461	2278	0.4546	-0.7553	3390	0.6888	-1.27	4501	0.9	1.13	1017	0.1886	-1.03	3469	0.7006	0.541881	0.463607	0.216347	1.55108	1.03401	1.15483	1.01155	1.29771
ABCA9	1.55	126	0.013	0.8952	1977	0.368	1.63	81	0.011	-0.8393	3570	0.7182	-1.4	4763	0.9551	0.5815	2710	0.5398	-0.9789	3558	0.719	-1.68	5009	0.9967	-0.8298	2584	0.5323	-0.59675	-0.393377	-0.409042	0.00639	0.625299	0.16775	-0.580321	-0.579373
ABCB1	0.7796	2276	0.427	0.9217	1865	0.348	-1.23	4276	0.872	-1.39	4726	0.9438	-1.3	4553	0.9143	0.8476	1957	0.3929	-1.36	4715	0.941	-0.9464	3820	0.7695	-1.18	4115	0.8275	0.004278	-0.814374	-0.759137	-0.331791	0.485874	-0.988197	-0.236945	-0.249284
ABCB10	1.11	1226	0.204	-0.748	3420	0.695	1.53	163	0.024	-1.11	4215	0.851	0.8652	1679	0.3262	-1.49	4863	0.9672	-1.27	4499	0.899	0.8037	2066	0.4026	0.6374	1511	0.2981	0.15085	-0.014023	1.18848	0.411662	0.518918	0.336471	0.848299	0.959583
ABCB11	1.13	1157	0.193	1.01	1576	0.285	1.09	965	0.167	0.6106	2633	0.5244	-1.05	3964	0.8003	1.1	1118	0.2115	-1.5	4921	0.976	-1.28	4544	0.91	-0.825	2564	0.4972	-0.81154	-0.241282	-0.04487	-1.49606	0.846418	-0.301649	0.026751	-0.413122
ABCB4	1.16	1040	0.168	-0.849	3667	0.743	1.55	141	0.018	1.18	822	0.157	-0.7696	3174	0.6365	1.55	55	0.01	-0.8321	3067	0.619	-1.49	4852	0.9679	-1.43	4864	0.9666	-0.827634	-0.780007	-0.704029	-0.664923	0.276644	0.369091	0.805794	0.656402
ABCB5	1.02	1518	0.261	0.843	2149	0.406	-0.7908	3013	0.599	-0.9928	3971	0.8021	-1.59	4977	0.9887	1.29	497	0.0953	-1.5	4915	0.979	-1.69	5017	0.9943	-1.05	3550	0.7152	-1.16609	-0.827472	-1.56728	-1.48802	-0.015555	-1.13116	-0.740972	-0.873401
ABCB6	1.32	571	0.085	0.8168	2244	0.437	1.57	132	0.02	1.01	1418	0.2769	-1.15	4201	0.8488	0.9233	1731	0.3427	-1.43	4805	0.961	0.7876	2110	0.4126	-1.19	4151	0.8354	0.079782	0.560528	0.88421	-0.167165	0.836354	1.38338	0.681029	0.67604
ABCB7	1.41	341	0.046	1.3	565	0.09	-1.25	4343	0.885	1.32	424	0.0688	0.534	2468	0.4999	-0.6408	3126	0.6278	-1.06	3866	0.78	-0.7698	3351	0.6737	-0.8827	2805	0.5756	-1.30665	-1.67354	-1.40074	-0.374822	-1.03582	-0.70061	-1.38594	-1.26441
ABCB8	1.47	226	0.03	1.21	864	0.145	1.03	1101	0.195	-1.01	4010	0.8096	-0.7449	3114	0.6236	0.5553	2748	0.5571	-0.8952	3281	0.661	-1.54	4927	0.9784	-1.17	4068	0.8192	-0.852965	0.15863	0.077806	0.711922	0.124823	-0.414752	1.11038	0.341001
ABCB9	1.14	1131	0.186	-0.619	3153	0.627	1.6	101	0.013	1.03	1341	0.2614	-1.21	4331	0.8753	1.43	203	0.0353	-0.8097	2987	0.605	-0.7314	3256	0.6563	-1.04	3527	0.7096	-0.171927	-0.616206	-1.15982	-0.808973	-0.127919	-0.985191	-0.469247	-0.208819
ABCC1	0.7582	2339	0.454	-0.8141	3576	0.731	-0.7333	2871	0.567	0.8232	2027	0.4019	1.23	641	0.124	-0.591	3011	0.6128	0.9985	1093	0.209	1.52	117	0.0173	-0.7435	2268	0.4487	1.58053	0.999482	1.2999	0.058863	0.592223	1.45143	0.940262	1.64509
ABCC2	-0.6434	3126	0.624	0.7143	2575	0.51	0.6552	2080	0.4	-1.37	4701	0.9378	1.61	55	0.0074	-0.7255	3315	0.6735	1.22	627	0.114	1.49	154	0.0248	-0.7577	2316	0.4586	-0.135132	-1.3675	-0.497349	-0.645616	-1.3137	0.41634	-0.906585	-1.51237
ABCC3	1.12	1201	0.201	1.41	299	0.047	-0.9099	3373	0.677	0.6971	2422	0.4795	0.8594	1706	0.3196	-0.7462	3364	0.6791	1.53	153	0.027	1.33	412	0.0797	1.69	57	0.0078	1.03656	0.538579	-0.119976	0.185613	-0.840408	-0.255913	-0.771471	-0.439696
ABCC4	1.18	980	0.156	-1.29	4508	0.923	1.46	258	0.034	-0.8996	3727	0.7567	0.821	1815	0.3544	0.6275	2609	0.531	0.6375	1967	0.399	0.5913	2620	0.5192	0.9201	889	0.1754	-0.340735	0.322482	0.771602	0.444173	0.733517	0.138765	1.23793	1.07398
ABCC5	-0.8461	3573	0.723	-1.34	4566	0.934	1.22	699	0.117	1.15	902	0.1741	-0.702	2990	0.6024	0.7063	2382	0.4892	-0.8714	3190	0.643	-1.11	4203	0.8478	-1.37	4741	0.9426	0.554379	1.49443	1.09623	1.56957	1.49886	1.46194	1.56337	1.08428
ABCC6	-0.8495	3578	0.725	0.4509	3015	0.592	-0.8357	3149	0.627	1.51	102	0.017	1.53	106	0.017	0.7618	2235	0.4529	1.57	101	0.016	1.19	834	0.151	-1.01	3325	0.6746	1.03137	1.10288	0.788171	0.240423	-0.329586	1.24163	0.977296	1.53636
ABCC8	1.3	630	0.089	0.8935	1984	0.369	1.45	272	0.036	1.14	939	0.1811	-1.21	4338	0.8768	1.22	700	0.1366	-0.9199	3360	0.678	0.8071	2055	0.3991	-0.6769	2039	0.4055	-0.813632	0.189962	-0.393044	-0.221557	-0.348887	-0.535821	-0.267943	-1.32101
ABCD1	-0.7984	3463	0.701	-0.7633	3459	0.703	1	1171	0.208	-1.32	4631	0.9254	1.04	1160	0.2118	0.8753	1892	0.3704	0.7357	1735	0.337	1.11	1096	0.2011	-0.8163	2530	0.4892	1.19062	0.392191	0.513318	1.1306	0.137109	0.348228	-0.213893	0.358591
ABCD2	0.9579	1735	0.303	1.38	375	0.058	-1.37	4660	0.936	1.13	962	0.1834	-1.29	4535	0.9123	0.8696	1910	0.3749	-1.03	3746	0.746	-0.6982	3173	0.6356	-0.897	2869	0.5617	-1.4592	-1.15732	-1.60344	-1.44852	-1.15385	-1.04483	-1.83408	-1.97085
ABCD3	1.36	458	0.065	1.04	1470	0.263	0.7559	1834	0.343	0.6184	2612	0.5211	-1.39	4742	0.9445	1.19	792	0.1543	-1.01	3688	0.735	-1.47	4830	0.9625	0.914	902	0.1628	0.250061	0.73744	-0.227382	0.233544	0.308411	-0.178217	0.509221	-0.460584
ABCG1	1	1602	0.279	0.7508	2463	0.471	0.6388	2125	0.401	1.56	66	0.0107	-0.7733	3185	0.639	0.6621	2519	0.5147	1.21	663	0.121	0.7845	2124	0.4142	1.27	365	0.0606	-0.2575	-0.250655	0.452208	-0.782244	-0.758112	0.094664	-0.532607	0.230305
ABCG2	0.6933	2532	0.482	0.7525	2456	0.47	-1.15	4071	0.826	-1.69	5007	0.9933	-1.13	4127	0.8352	0.7868	2140	0.4368	-1.35	4695	0.935	-1.56	4938	0.9811	0.5023	1655	0.3253	0.998016	0.223607	0.730351	1.88073	1.59059	0.789217	1.08763	-0.443431
ABCG5	1.26	737	0.114	0.6271	2807	0.557	0.8554	1563	0.286	0.8159	2053	0.4022	-0.7013	2985	0.59	1.18	821	0.1583	0.6674	1883	0.37	-0.7902	3405	0.6876	-1.15	3999	0.7956	-0.333396	-1.14351	-1.73511	-0.407881	-1.18061	-0.26688	-0.633363	-0.227317
ABCG8	1.12	1200	0.198	1.19	925	0.149	1.03	1109	0.198	-0.9115	3764	0.7632	-0.925	3589	0.7303	1.21	722	0.1411	-0.8055	2974	0.602	-1.35	4673	0.9336	-0.8292	2580	0.514	0.651934	0.189276	0.185209	0.656538	0.787205	0.477457	1.11207	0.539732
ABI2	1.04	1456	0.252	0.9257	1846	0.346	0.9017	1450	0.261	-0.9565	3881	0.7856	0.7422	2042	0.4019	-1.14	4339	0.8656	0.9954	1100	0.211	1.24	656	0.1215	-0.6172	1896	0.3761	-0.378555	-1.17344	-0.196702	-1.07664	-0.858805	-0.439947	-0.839269	0.123224
ABL1	-0.965	3836	0.788	-1.41	4659	0.952	1.25	642	0.105	0.9139	1728	0.3401	1.05	1143	0.2196	-0.9254	3848	0.7757	1.42	295	0.051	1.21	764	0.1392	-1.35	4701	0.9369	-0.11671	-0.822342	-0.594059	0.160325	-0.444396	0.305113	-0.119041	0.025049
ABL2	-0.9164	3747	0.763	-0.9179	3834	0.781	-1.02	3691	0.744	-0.7233	3260	0.661	1.35	380	0.0689	1.14	965	0.1885	1.29	500	0.089	1.33	408	0.0798	-1.07	3658	0.7365	1.4958	-0.048809	0.927859	-0.297927	0.871684	1.3577	0.82519	0.665626
ABLIM1	1.34	499	0.07	1.11	1201	0.21	0.8559	1561	0.287	0.7827	2154	0.432	0.7348	2068	0.4091	-1.02	4094	0.8161	-0.8987	3295	0.665	0.9883	1499	0.2832	-1.2	4191	0.8556	-1.33264	-1.41524	-0.239747	-0.419677	-0.643317	0.130496	-0.181148	-0.1138
ABLIM2	1.2	906	0.141	0.9598	1732	0.323	1.08	983	0.172	-0.7418	3302	0.6699	0.5442	2455	0.4937	-0.8222	3584	0.7239	-1.16	4192	0.843	0.8547	1907	0.3685	-1.15	3984	0.8038	-0.620391	-1.80045	-0.371266	-0.452597	-0.49113	0.060717	-0.531156	0.373111
ABLIM3	-1.02	3950	0.814	-1.19	4360	0.894	0.5476	2283	0.436	1.17	852	0.1569	-0.6285	2809	0.5715	-1.24	4510	0.8946	1.19	689	0.134	-0.9181	3757	0.7476	0.8413	1071	0.2275	-0.464931	0.126885	0.668154	-0.100252	-0.111016	0.633936	-0.356679	0.784294
ABO	-0.9355	3787	0.773	0.6914	2627	0.51	-0.9532	3494	0.704	1.05	1243	0.2446	-0.867	3418	0.6987	0.6068	2650	0.5402	-0.7071	2689	0.542	1.12	1059	0.1986	-0.4554	1690	0.332	1.04448	0.493436	0.585385	0.197575	0.986186	-0.19644	0.197897	1.35857
ABP1	-1.05	4015	0.826	-1.64	4917	0.989	1.15	835	0.144	0.7337	2323	0.4622	-0.6385	2828	0.5703	1.03	1391	0.268	1.22	638	0.115	0.9319	1673	0.3193	0.8087	1151	0.2271	1.21772	1.26917	0.946453	1.29855	0.12013	1.8119	0.636989	0.304962
ACAA1	-0.8362	3547	0.717	-1.45	4705	0.96	1.42	309	0.044	-0.9007	3730	0.7573	-1.45	4841	0.9617	1.15	934	0.1812	-1.38	4756	0.948	-0.6559	3073	0.6185	0.8029	1163	0.23	1.6481	1.17017	-0.256196	0.57793	1.00984	0.012592	-0.097713	0.197029
ACAA2	0.9855	1656	0.284	-0.9364	3875	0.801	1.02	1141	0.202	0.7313	2331	0.4559	1.01	1227	0.2285	-0.7596	3402	0.6855	-0.8864	3252	0.646	1.45	211	0.0391	0.7905	1191	0.214	1.62671	1.75871	1.39408	1.19311	0.926844	1.04489	0.953072	1.71205
ACACA	1.55	122	0.013	1.56	101	0.011	1.25	628	0.102	-0.554	2954	0.5879	-1.23	4370	0.8837	1.56	50	0.0087	-1.03	3750	0.746	-1.21	4386	0.8824	-1.15	3967	0.8013	-0.831439	-1.14522	-1.18429	-0.883927	-0.259707	0.0475	-0.57974	-1.13284
ACACB	1.33	543	0.075	1.62	58	0.006	-0.6562	2668	0.522	-0.5869	2993	0.5966	0.8114	1849	0.3657	-1.34	4675	0.9278	1.33	430	0.08	-1.15	4269	0.8504	1.16	480	0.0992	-2.3113	-1.10905	-1.02723	-0.120221	-1.43875	-0.976394	-0.494311	-1.26554
ACAD8	-1.12	4144	0.86	-0.6437	3195	0.645	-0.9875	3589	0.732	-1.34	4659	0.9269	-0.6572	2871	0.5796	-1.21	4445	0.887	-0.5186	2322	0.464	1.32	450	0.0843	1.18	462	0.0828	0.100635	-0.487455	-0.512804	-0.254096	-0.662376	-1.69809	-1.43996	-0.362931
ACAD9	1.04	1459	0.252	0.7704	2397	0.457	1.3	519	0.083	1.21	717	0.1382	-0.6464	2845	0.5743	-0.7575	3396	0.6902	-0.813	2997	0.607	0.7294	2288	0.4475	-1.11	3814	0.7669	-0.589152	-0.264696	-0.246364	-0.31936	0.173513	0.383114	-0.451943	-0.042666
ACADL	1.3	627	0.089	1.15	1052	0.181	0.6224	2157	0.409	1.1	1056	0.2057	0.8593	1708	0.3303	0.7389	2294	0.47	1.23	605	0.109	-0.7328	3264	0.6573	0.8856	967	0.1894	-0.34643	-0.442305	-0.172736	-0.253029	-0.98844	-0.795266	0.031758	-0.846985
ACADM	0.9918	1635	0.279	1.33	494	0.079	0.9244	1391	0.246	0.8398	1968	0.3845	-0.5324	2657	0.5242	0.5405	2764	0.5602	1.35	390	0.069	0.7952	2088	0.4115	1	713	0.1318	1.03138	0.928396	0.201807	-0.257217	-1.07892	-0.394727	-0.128005	0.312434
ACADS	-0.8938	3678	0.758	1.25	731	0.125	-1.24	4301	0.878	-0.6592	3122	0.6214	1.32	439	0.0849	0.6552	2540	0.5172	1.81	7	0.002	1.11	1078	0.199	-1.06	3587	0.7087	-0.527644	-1.44951	-1.31475	-1.2225	-2.50624	-1.73311	-0.89264	-1.44585
ACADSB	1.45	252	0.033	1.05	1422	0.255	1.16	816	0.141	-0.6934	3196	0.6423	1.33	415	0.0732	-1.39	4750	0.9434	1.4	326	0.054	1.4	274	0.0423	1.72	44	0.0045	0.498012	-0.40052	-0.260669	-0.703983	-1.44661	-0.594297	-1.00296	0.322109
ACADVL	1.05	1427	0.246	1.67	26	0.003	0.8973	1461	0.263	1.14	945	0.1823	1.01	1229	0.2396	0.9084	1774	0.3532	-0.7056	2682	0.541	0.7466	2240	0.4372	-1.05	3537	0.7132	1.08932	0.067777	-0.272219	0.964391	0.784298	0.698173	0.289154	0.354791
ACAN	-0.6794	3198	0.633	1.04	1458	0.261	-0.9473	3477	0.7	-1.23	4445	0.8933	-0.832	3336	0.677	1.47	137	0.0247	-1.59	4998	0.992	-0.6442	3056	0.6132	-1.3	4550	0.907	-0.01718	-0.188723	-0.692229	-0.284045	0.699465	-0.14963	0.903621	0.231674
ACAT1	-1.01	3931	0.818	-1.48	4741	0.969	1.36	410	0.065	0.9633	1563	0.2925	-1.03	3882	0.7871	-0.9879	4006	0.8076	-1.12	4063	0.813	-0.6653	3094	0.6206	-1.14	3917	0.7817	-1.4209	-0.850526	-0.502226	-0.892258	-0.337112	-0.806461	-0.243983	-0.012649
ACAT2	0.8827	1973	0.361	-0.8953	3780	0.778	-0.996	3615	0.738	0.9635	1561	0.3051	-1.43	4815	0.9577	1.05	1302	0.2501	0.4952	2190	0.443	-0.7337	3265	0.6578	-0.8278	2573	0.5122	-0.574703	-0.276219	-0.577345	-0.665024	-0.217262	-0.22146	-0.608091	-0.455152
ACCN1	-0.7973	3457	0.694	1.14	1103	0.19	-1.04	3741	0.756	-1.57	4939	0.9805	-1.5	4902	0.9743	-1.17	4379	0.8747	-1.38	4736	0.945	-1.51	4889	0.9735	1.77	33	0.004	0.189924	-0.554039	-0.527256	-0.780975	0.539525	-1.82808	-0.992356	-0.829145
ACCN2	0.7165	2460	0.483	-1.08	4178	0.86	1.31	506	0.082	-0.9384	3831	0.7755	0.9529	1395	0.2651	-0.8343	3622	0.724	0.9142	1281	0.242	-0.7273	3247	0.6526	0.7321	1329	0.2389	-0.597536	-1.76244	-2.0475	-1.29594	-1.64794	-1.1734	-0.423627	-0.863184
ACCN3	1.09	1291	0.216	0.6507	2742	0.546	0.4881	2331	0.449	1.05	1271	0.2482	-1.05	3959	0.7936	1.32	415	0.0775	-1.2	4297	0.863	-0.5278	2863	0.5719	-1.29	4512	0.9008	-0.168292	-1.44904	-1.78091	-0.898272	0.064493	-0.681523	-1.18163	0.464689
ACCN4	-0.7898	3441	0.689	-1.22	4412	0.904	-0.8355	3148	0.627	1.08	1126	0.2202	1.23	652	0.1271	-0.6345	3109	0.6295	-1.02	3709	0.739	0.8523	1914	0.3706	-1.23	4311	0.8661	0.941115	0.670614	0.590726	1.35126	0.82113	1.91335	0.74204	0.522954
ACCN5	0.813	2178	0.404	1.23	777	0.124	-1.27	4389	0.892	0.8896	1809	0.3568	-1.32	4584	0.9204	0.4975	2808	0.5705	-1.1	3992	0.8	-1.09	4154	0.8399	-0.9719	3193	0.6418	-1.56164	-0.646718	-0.543012	-0.598395	-0.270741	-0.71274	-0.135059	-0.472709
ACE	0.7687	2304	0.445	1.15	1057	0.186	-1.1	3946	0.803	0.8426	1962	0.382	-0.9295	3609	0.7283	-1.66	5006	0.9901	-1.38	4734	0.94	1.24	660	0.1254	1.11	541	0.0956	-1.04572	-1.17747	-0.049046	0.040434	-0.6761	-0.014742	-0.648691	-1.99969
ACE2	-1.29	4417	0.923	-1.64	4918	0.988	1.08	996	0.174	1.09	1102	0.2171	0.7961	1891	0.3703	1.09	1147	0.219	0.6595	1909	0.388	1.38	318	0.06	-1.07	3650	0.7338	0.268627	1.06979	-0.305222	-0.719203	0.406899	0.984793	0.445335	-0.250339
ACHE	1.45	255	0.033	1.49	188	0.022	-1.43	4767	0.961	0.738	2308	0.4513	0.7463	2023	0.3925	-0.843	3646	0.7296	0.8246	1512	0.288	0.8826	1835	0.3494	-0.5364	1765	0.32	-0.654647	-1.11885	-0.06146	-0.713252	-0.946476	-0.222941	-1.44091	-0.709561
ACIN1	-0.705	3245	0.645	0.5526	2938	0.572	-0.5774	2514	0.489	0.9642	1559	0.3046	0.759	1983	0.391	-1.26	4550	0.9054	0.5786	2083	0.422	0.5851	2633	0.5212	0.6265	1532	0.3011	0.08529	0.152958	1.38641	1.39745	0.902721	-1.1097	1.00201	1.06637
ACLY	1.11	1246	0.206	1.06	1374	0.245	0.9287	1376	0.247	-0.5691	2975	0.5927	1.47	186	0.0332	0.5522	2752	0.5577	-0.4371	2256	0.453	1.17	903	0.1658	0.8625	1024	0.201	0.463896	-1.52845	-2.39513	-0.164741	-0.681507	-0.852254	-1.80754	-0.486808
ACMSD	-1.74	4962	0.997	-1.72	4976	0.995	-0.8584	3215	0.642	-1	3987	0.8012	0.9576	1386	0.2815	-0.8071	3541	0.7092	0.6427	1949	0.409	0.6131	2566	0.5052	-1.1	3766	0.7681	0.948318	0.061576	0.89072	1.14772	0.74874	1.16382	0.918836	0.182778
ACO1	1.69	26	0.003	0.8054	2276	0.446	1.53	166	0.024	0.7996	2113	0.4114	1	1266	0.2365	1.16	884	0.1708	-0.7379	2774	0.55	1.05	1283	0.2365	-1.04	3513	0.6942	0.874315	-0.204933	-0.804841	-0.088722	-0.117188	0.489063	0.19972	-0.193141
ACO2	0.9339	1804	0.325	1.49	196	0.023	-1.42	4748	0.956	-1.67	4998	0.992	-0.8472	3375	0.6875	-1.36	4708	0.9343	-1.7	5033	0.998	-1.27	4509	0.9037	0.5783	1597	0.3143	-0.468132	-1.78685	-0.112775	-0.253179	0.832472	-1.31441	-0.635864	-1.0818
ACOT11	-1.26	4362	0.914	-0.6814	3270	0.662	-0.7219	2836	0.561	-0.9354	3824	0.7735	-0.7709	3178	0.6292	0.8503	1948	0.3873	1.05	1003	0.176	-0.8141	3466	0.7012	1.32	305	0.049	1.55563	1.0991	0.245595	0.531081	0.357701	0.748253	1.05963	-0.002884
ACOT12	1.35	485	0.07	-0.5408	3072	0.619	1.43	300	0.045	1.12	989	0.1905	-0.9177	3570	0.7218	-0.7323	3334	0.671	0.8947	1324	0.252	1.07	1222	0.2246	-0.7808	2402	0.461	0.026721	0.297749	-0.125816	-0.120288	-0.296881	-0.808665	-0.256185	-0.470875
ACOX1	-0.8935	3677	0.751	-1.2	4375	0.896	1.36	411	0.062	-0.935	3823	0.7763	-1.28	4498	0.9043	-0.7803	3464	0.7014	-1.32	4612	0.92	-1.44	4794	0.9564	-1.03	3452	0.6983	-1.733	-1.0981	-1.09263	-0.630076	-0.76629	-1.08277	-0.919067	-1.39054
ACOX2	-0.7581	3361	0.672	-0.9615	3935	0.804	0.9276	1378	0.247	-1.16	4325	0.8697	0.8589	1711	0.3304	0.9401	1667	0.3308	0.6016	2042	0.413	1.58	66	0.0089	0.9589	807	0.1577	0.691142	0.050649	-0.197447	-0.152297	0.107121	-0.550996	-0.40431	0.280745
ACOX3	-0.5568	2978	0.599	0.7835	2347	0.463	-1.03	3729	0.762	0.936	1655	0.3242	0.6201	2327	0.4675	1.12	1053	0.2034	-0.7493	2808	0.568	0.5694	2654	0.528	-1.06	3601	0.7245	-0.720866	-1.73175	-2.13985	-1.7455	-1.12782	-1.25606	-1.35876	0.644078
ACP1	-1.01	3946	0.812	-1.13	4267	0.876	-0.7893	3008	0.598	-0.8393	3569	0.7252	0.5005	2507	0.5041	-1.04	4138	0.829	-1.23	4372	0.877	-0.6701	3102	0.6249	-0.8898	2840	0.5684	0.506693	0.275771	0.559568	0.101112	0.909057	1.1104	0.267878	0.840817
ACP2	1.41	338	0.047	-0.7673	3468	0.705	1.55	147	0.022	1.04	1299	0.2431	0.7631	1968	0.381	0.7185	2354	0.4795	0.9319	1236	0.233	1.12	1055	0.193	-1.15	3983	0.792	0.380739	0.299569	0.132804	-0.572933	-0.344921	0.608586	0.478872	0.456653
ACP5	0.866	2026	0.373	-0.7395	3398	0.691	0.8573	1557	0.285	0.7891	2139	0.4178	1.02	1200	0.223	-0.8744	3725	0.7472	1.19	697	0.125	0.8454	1935	0.3747	0.9691	788	0.1415	1.03848	0.807186	0.778382	1.20095	0.274035	0.699129	0.6379	0.964985
ACP6	1.21	867	0.14	1.35	430	0.067	0.8653	1545	0.28	-1.02	4020	0.8145	-1.01	3844	0.7798	-1.57	4940	0.9807	-0.5156	2319	0.45	-1.11	4188	0.8517	1.4	232	0.0356	-0.454724	-0.676761	0.53247	0.10449	-0.6238	0.009949	-0.004225	-0.628553
ACPP	0.5217	2839	0.555	0.88	2027	0.38	-0.5924	2541	0.494	-1.36	4693	0.9358	0.6369	2297	0.4593	-1.17	4384	0.8752	-1.29	4543	0.908	-0.8463	3554	0.7172	-0.8325	2596	0.5166	-0.360429	-0.926255	0.507738	0.07142	-0.052235	0.061017	-0.323392	-0.399766
ACPT	-0.7982	3461	0.701	-1.17	4336	0.892	1.25	625	0.099	1.03	1319	0.246	1.36	355	0.07	-1.03	4117	0.8261	0.7535	1696	0.326	1.01	1409	0.26	-0.9257	2998	0.5881	0.963805	0.552633	1.39294	1.61253	0.499157	1.39237	0.195909	1.09692
ACSL1	1.23	811	0.121	1.02	1530	0.277	0.8567	1559	0.286	-0.5784	2985	0.5957	-0.7854	3213	0.6458	-1.2	4437	0.8858	0.6199	2000	0.406	1.1	1137	0.2119	-0.9868	3241	0.6572	0.393248	0.113076	0.55139	1.30788	0.697412	1.35554	0.055968	0.997845
ACSL3	-0.4922	2928	0.574	0.7627	2421	0.462	0.5604	2263	0.433	-1.32	4636	0.92	-0.744	3109	0.6231	-1.05	4139	0.8291	-1.19	4264	0.856	-1.02	3995	0.8041	-0.8239	2561	0.5095	-0.193541	-0.665257	-0.401447	0.450169	-0.281771	-0.007327	-0.545929	-0.514695
ACSL4	1.08	1317	0.221	-0.8612	3696	0.759	1.02	1138	0.202	-0.7397	3296	0.6625	-0.7321	3069	0.6056	-1.65	4998	0.9885	-0.7782	2885	0.574	-1.02	3998	0.8083	-1.08	3676	0.7278	-2.11381	-1.33568	-0.746367	-0.69881	-1.4754	-1.30204	-0.884517	-1.55159
ACSL5	0.8849	1963	0.357	1.48	201	0.024	0.5642	2256	0.431	-0.6445	3090	0.622	1.11	1000	0.1895	-0.9407	3884	0.7834	1.69	39	0.004	-1.03	4023	0.8099	-0.9937	3268	0.6641	0.342842	0.759779	0.18603	1.02941	-0.223553	1.09618	0.977448	0.48648
ACSL6	-0.8397	3557	0.719	1.02	1539	0.279	-1.52	4891	0.981	1.35	359	0.0638	-1	3799	0.7681	1.23	656	0.1266	1.34	418	0.073	0.515	2723	0.5406	-0.8599	2713	0.5401	-1.28201	-0.570567	-1.4941	-1.02272	-2.16123	-0.141517	-0.496562	-1.19798
ACSM1	0.5224	2837	0.566	1.34	456	0.072	-1.2	4191	0.856	-1.47	4842	0.9644	1.4	284	0.0464	-1.21	4462	0.885	-0.799	2953	0.599	-0.553	2895	0.5757	1.03	667	0.1439	-0.027301	-1.59844	-1.00585	0.071942	-0.699338	-1.51955	-0.772914	-0.633471
ACSS1	-0.7117	3269	0.654	-1.43	4680	0.958	1.22	703	0.112	0.7525	2255	0.4411	1.28	517	0.099	-1.53	4894	0.9743	1.63	66	0.012	-0.8886	3684	0.7392	-0.719	2181	0.4144	0.070379	0.188986	0.465052	1.17075	-0.693282	-0.103109	0.797239	0.452603
ACSS2	0.944	1772	0.314	0.806	2273	0.445	-0.6113	2578	0.501	0.8326	1994	0.3897	-1.11	4097	0.829	1.47	138	0.0324	0.6469	1937	0.381	0.7885	2106	0.4164	-0.7005	2110	0.4042	0.99915	0.642265	0.647294	0.296414	0.513616	0.663021	1.0386	0.513327
ACTA2	1.37	438	0.061	0.8592	2104	0.401	1.03	1102	0.196	1.04	1310	0.2448	-1.26	4450	0.8981	1.38	297	0.0598	-0.9114	3335	0.666	1.06	1268	0.2371	0.9317	862	0.1563	-2.0327	-2.03129	-1.67652	-1.78327	-1.6192	-2.04886	-1.95078	-1.21971
ACTG1	-1.05	4032	0.829	-0.7365	3388	0.68	-1.43	4762	0.96	-1.58	4945	0.9852	0.7064	2132	0.4256	-1.35	4683	0.9298	-1.12	4033	0.816	-1.15	4267	0.85	0.9809	762	0.1621	1.08683	0.285308	1.0339	1.68618	0.880604	-0.135278	1.21242	0.234094
ACTG2	1.02	1524	0.262	1.56	102	0.012	-1.2	4209	0.859	-1.36	4685	0.9333	-0.5032	2618	0.5261	0.8907	1832	0.364	-1.1	3995	0.802	1.18	851	0.1558	-1.05	3567	0.7182	0.626084	-0.725039	-0.337506	-0.523972	0.41364	-0.503192	-0.641009	-0.525351
ACTN1	0.7515	2358	0.46	0.7913	2317	0.457	0.56	2268	0.435	1.05	1275	0.2392	-0.8533	3387	0.6819	0.5655	2740	0.5521	-0.6221	2475	0.487	1.07	1223	0.2246	-0.7657	2345	0.4487	0.152862	-0.155034	-0.247998	0.151414	-0.276122	0.792958	-0.522935	0.074182
ACTN2	0.9736	1695	0.292	1.52	152	0.02	-1.22	4251	0.868	1.11	1036	0.1987	-1.12	4117	0.8337	0.9815	1545	0.2908	-0.8644	3163	0.631	-0.9715	3880	0.7847	-1.16	4032	0.8026	0.078477	0.959328	0.073875	-0.454262	0.865063	1.33635	1.11095	-0.746339
ACTN3	1.23	833	0.133	1.02	1535	0.277	-0.655	2665	0.523	-1.37	4704	0.9403	-1.04	3910	0.7922	-0.9048	3799	0.7636	-1.2	4292	0.859	-1.45	4799	0.9571	-1.46	4901	0.967	-0.651988	-1.00823	-1.02501	0.047607	0.686198	-0.169858	0.065989	-0.3606
ACTN4	1.62	64	0.006	1.23	784	0.125	1.64	72	0.01	0.6528	2542	0.5096	-1.41	4772	0.9512	0.9649	1606	0.3133	-1.59	5000	0.992	-1.56	4937	0.9808	0.9107	913	0.1797	-0.131838	0.602923	-0.224954	0.276351	0.727357	-0.373616	0.331602	-0.154507
ACTR2	-0.7342	3309	0.659	-0.7301	3374	0.676	-0.8147	3088	0.614	0.8891	1812	0.362	0.807	1860	0.3681	1.44	183	0.0255	-0.9969	3622	0.731	0.9515	1619	0.31	-0.9897	3248	0.6721	1.23364	0.244409	-0.714961	0.108125	0.925378	0.169469	0.442729	1.12502
ACTR3	-0.8586	3600	0.73	1.18	946	0.155	-1.41	4738	0.955	-1.09	4173	0.845	1.03	1190	0.2309	-1.48	4843	0.9635	-0.9218	3374	0.68	-1	3956	0.7975	-1.15	3976	0.803	-0.241011	-1.19197	0.753632	1.14126	-0.003065	-1.02658	-0.249548	-0.265425
ACVR1	-1.14	4195	0.869	-1.41	4655	0.952	-0.7242	2845	0.558	0.9729	1524	0.2995	-1.11	4098	0.8288	1.36	335	0.0604	-0.7023	2669	0.538	0.7866	2115	0.413	-0.8646	2736	0.5452	1.50286	1.82461	0.812603	1.16106	1.67487	1.74978	1.29457	1.47207
ACVR1B	-1.09	4103	0.847	-1.31	4532	0.926	1.4	349	0.052	-0.6408	3082	0.6195	1.3	480	0.0884	-0.7276	3319	0.6747	-0.7523	2822	0.57	-0.8119	3457	0.6984	-1.54	5001	0.9896	-0.762517	-0.018762	0.10481	0.811207	0.558401	1.07433	0.704849	1.044
ACVR1C	0.6971	2524	0.495	0.9301	1829	0.345	0.5297	2303	0.442	0.59	2665	0.5334	1.37	327	0.0654	-1.08	4234	0.8477	1.41	301	0.051	1.36	355	0.0665	1.57	116	0.0175	1.82781	0.476634	0.475192	0.254398	-0.623646	0.342109	-0.814932	-0.553147
ACVR2A	1.11	1224	0.202	0.5511	2943	0.573	0.5768	2235	0.427	0.791	2133	0.4235	-0.951	3671	0.7434	-0.5126	2920	0.5916	-0.8382	3077	0.623	0.8596	1893	0.3653	-0.9394	3045	0.6131	-0.473735	-0.399352	-0.589607	-0.891419	0.068054	-0.015359	-0.184297	-0.010209
ACVR2B	1.3	622	0.088	1.5	169	0.02	-1.15	4090	0.828	1.14	940	0.1812	-0.5064	2621	0.5268	0.5836	2708	0.549	-0.5066	2311	0.461	-1.14	4239	0.8557	-0.587	1848	0.3637	-0.166949	0.084204	-0.423088	0.307873	-0.35884	-0.946565	0.171977	0.404689
ACVRL1	1.45	266	0.036	1.01	1577	0.285	-0.6272	2605	0.508	-1.65	4986	0.9875	1.16	849	0.1554	-1.37	4723	0.9415	0.7838	1618	0.311	-0.8147	3468	0.7015	1.52	150	0.0224	-0.429002	-1.80314	-0.73395	0.250291	-1.74998	-1.90804	-0.693228	-0.852609
ACY1	1.17	1011	0.167	1.18	961	0.167	0.6306	2143	0.41	0.9765	1508	0.2834	1.03	1194	0.2216	-1.35	4688	0.9356	1.56	119	0.022	-0.9425	3812	0.7694	0.5491	1628	0.292	-0.322499	-0.155538	0.100808	0.107507	-0.526808	0.564727	0.242657	0.021904
ACY3	0.9563	1742	0.304	1.08	1307	0.231	-0.9986	3625	0.74	-0.9294	3807	0.77	0.8482	1750	0.3264	-0.6188	3070	0.6205	-1.22	4338	0.867	-1.21	4381	0.8907	-1.24	4334	0.8587	1.07108	0.986173	0.753135	1.3744	1.34794	0.650011	1.31891	0.713276
ACYP1	-1.35	4508	0.934	-1.34	4569	0.934	0.7121	1954	0.366	1.16	893	0.1731	-1.05	3960	0.7938	0.689	2439	0.4996	-0.9743	3542	0.712	-0.4832	2819	0.5643	-0.9178	2962	0.5933	0.963862	0.990234	0.539899	0.065611	0.833792	0.627956	0.939055	0.439116
ACYP2	1.34	519	0.073	1.02	1545	0.28	0.5418	2291	0.438	-0.9337	3817	0.7756	1.13	937	0.1783	-1.46	4822	0.9596	1.32	441	0.077	-1.01	3968	0.7994	1.62	87	0.0149	-0.350719	-0.956323	-0.853915	0.660055	-1.20445	-0.039234	-0.881981	-0.708293
ADA	-0.6379	3113	0.612	0.6668	2692	0.524	0.6685	2050	0.388	-1.2	4408	0.8852	-0.688	2952	0.5948	-1.07	4206	0.8397	-1.52	4940	0.982	0.7015	2360	0.4625	0.5833	1592	0.3134	-0.150195	-1.2171	-0.34063	0.202865	0.554498	-0.204414	-0.58517	-0.732467
ADAM10	0.905	1899	0.344	0.7852	2341	0.449	-0.784	2993	0.595	1.03	1344	0.2622	-1.28	4496	0.904	1.16	893	0.1731	-0.457	2267	0.454	-1.61	4970	0.9872	0.5424	1632	0.3201	0.930986	1.36646	0.373688	1.22454	0.923734	0.462541	1.09499	1.30135
ADAM12	0.9929	1632	0.284	0.887	2008	0.375	-1.15	4075	0.826	-1.02	4024	0.8133	0.8281	1795	0.3503	0.9314	1707	0.3365	1.16	757	0.14	-0.7488	3299	0.6669	1.82	19	0.0028	0.840584	-0.20934	-1.28203	-0.176996	-1.27227	-0.635759	-0.806076	-1.32225
ADAM17	-1.12	4155	0.86	0.9478	1768	0.331	-1.1	3925	0.794	1.3	487	0.0854	-1.13	4140	0.8374	0.7871	2139	0.4367	-0.7194	2720	0.549	-1.15	4271	0.8618	-0.8986	2874	0.5761	-0.175362	-0.036655	-0.427502	0.65429	-0.02923	0.052659	0.151197	0.077512
ADAM8	-1.49	4713	0.967	0.6564	2724	0.528	-1.19	4166	0.851	-0.9616	3892	0.7887	-1.55	4951	0.9834	0.5151	2792	0.5669	-1.4	4789	0.956	-1.5	4872	0.9712	1.59	101	0.0186	-0.039715	0.346078	0.172195	-0.643114	0.330946	-0.33218	-0.441307	-1.38378
ADAM9	1.62	62	0.006	0.9318	1824	0.341	-0.7631	2948	0.584	-0.8589	3613	0.736	-0.7115	3009	0.6074	-1.32	4642	0.9219	0.8191	1528	0.306	1.23	695	0.1286	1.65	72	0.0127	0.540079	0.10798	0.450314	0.107707	-0.513783	0.248282	-0.896014	-0.079455
ADAMTS13	-0.509	2935	0.576	0.7367	2497	0.481	-1.04	3736	0.755	-0.5563	2960	0.5885	0.8757	1643	0.3197	1.25	609	0.1197	0.8395	1462	0.293	-0.8309	3511	0.705	-0.9578	3130	0.6297	-0.309118	-1.3637	-1.474	-1.12688	-1.38365	-0.015686	-0.331474	-1.06231
ADAR	1.15	1093	0.18	0.7744	2382	0.456	1.07	1011	0.176	1.26	575	0.1084	-0.6065	2772	0.5562	1.43	204	0.0353	-0.6657	2576	0.519	1.36	369	0.0691	-1.51	4962	0.9845	-0.126481	-0.836035	-0.494386	-1.43975	0.04304	1.0939	-0.001741	1.43358
ADARB1	1.04	1470	0.254	0.8684	2073	0.388	0.6452	2105	0.399	0.9972	1443	0.2838	-1.25	4435	0.895	1.41	238	0.0345	-1.11	4024	0.815	0.6464	2493	0.4909	-0.8949	2857	0.5844	0.473014	-0.547061	-1.31147	-0.225327	-0.094351	-0.217105	-1.18386	-0.169445
ADC	0.7028	2504	0.491	0.621	2817	0.559	0.9252	1387	0.246	-1.08	4157	0.84	1.64	42	0.0094	-0.9672	3955	0.7979	1.72	27	0.005	1.05	1286	0.2369	-0.6406	1938	0.3627	-0.382798	-0.694811	-0.403391	0.273342	-1.26232	0.197169	0.458159	1.13818
ADCY1	1.34	524	0.077	1.12	1189	0.206	1.16	799	0.135	-0.6603	3126	0.6221	-1.15	4185	0.8458	0.7246	2336	0.4755	-0.9089	3322	0.664	-0.8084	3445	0.6982	1.17	470	0.0785	-0.052196	-0.416094	0.045472	-0.259582	-0.474865	-0.424005	-0.09359	-0.167496
ADCY2	0.8561	2049	0.376	-0.932	3866	0.788	0.8145	1672	0.308	-1.13	4262	0.8586	1.79	4	0.0002	-1.62	4982	0.9862	1.38	354	0.061	0.8128	2035	0.3959	1.04	642	0.1266	1.22237	0.450089	1.21134	1.62019	0.93597	1.26508	1.37775	0.873846
ADCY3	-1.38	4550	0.943	-0.7627	3455	0.695	-1.56	4930	0.987	0.5714	2698	0.5345	0.8158	1834	0.3633	-1.31	4624	0.9165	0.7589	1682	0.349	0.4778	2757	0.5432	0.8771	987	0.2099	-0.404882	-0.529833	0.917837	0.162702	0.133787	0.539574	0.100821	0.325683
ADCY4	-1.51	4735	0.974	-1.8	5011	0.997	0.7948	1733	0.321	-1.34	4661	0.931	-1.62	4991	0.9898	0.6811	2465	0.5025	-1.33	4659	0.923	-1.73	5027	0.996	0.8871	960	0.1722	0.091619	0.307954	1.00322	1.26297	1.43045	-1.64391	0.991161	-0.633609
ADCY5	-1.45	4668	0.96	-0.7398	3400	0.682	-1.05	3780	0.764	0.5035	2789	0.5593	-0.811	3283	0.6629	-1.33	4664	0.9264	-0.8636	3158	0.637	-0.7223	3236	0.6528	-0.7046	2122	0.4211	-0.316378	-1.46719	0.997333	0.290485	0.707317	0.635426	0.085413	0.137118
ADCY6	-0.9612	3833	0.796	-1.07	4146	0.855	-0.8905	3312	0.666	-0.6705	3147	0.6279	1.28	520	0.0995	0.8152	2044	0.4124	1.51	173	0.03	0.5663	2659	0.5323	-1.16	4007	0.7971	0.645868	0.666163	0.611388	0.752854	0.592895	1.00152	1.76887	0.806582
ADCY7	-0.6579	3159	0.621	0.7199	2561	0.492	-1.02	3689	0.744	-1.56	4923	0.978	-0.6857	2943	0.5934	-1.07	4211	0.8405	-1.39	4766	0.95	-1.11	4190	0.8469	1.28	351	0.0591	0.686662	0.258826	0.458885	1.16174	0.502843	-0.436105	0.780052	0.297733
ADCY8	-0.9061	3716	0.766	-0.6784	3263	0.66	0.6517	2089	0.401	0.9924	1458	0.2735	-1.23	4375	0.8865	-0.8562	3677	0.7363	0.7818	1626	0.312	1.05	1291	0.2369	0.7315	1333	0.2392	0.484328	0.116692	0.803185	0.607688	0.116206	0.710563	0.094842	0.482076
ADCY9	-1.57	4833	0.983	-0.8819	3747	0.761	-1.74	5024	0.999	0.8212	2036	0.4029	-0.8828	3465	0.7069	-0.7746	3447	0.6988	-1.21	4322	0.868	-0.9946	3938	0.7925	-1.23	4291	0.8628	-0.260297	-0.433123	-0.426764	0.602095	-0.165418	-0.661834	-0.135746	0.709796
ADCYAP1	0.7938	2223	0.427	0.4277	3020	0.589	-0.8171	3093	0.628	-0.8168	3508	0.7113	-0.7488	3127	0.6254	0.988	1524	0.297	-1.01	3670	0.732	-1.35	4671	0.9334	-1.08	3678	0.7408	1.15942	1.26167	0.643258	0.787199	1.13926	0.988586	1.14144	1.53026
ADCYAP1R1	0.5249	2831	0.554	-1.16	4321	0.885	0.7028	1975	0.371	0.6928	2437	0.4851	-1.18	4258	0.8601	-1.21	4451	0.8836	-1.02	3698	0.744	0.4897	2748	0.5419	1.21	431	0.0877	-0.336937	-0.262162	0.144843	-0.085751	0.136634	-0.59848	-0.984197	-1.37819
ADD1	1.12	1172	0.197	0.6093	2842	0.564	0.8047	1704	0.315	0.9015	1770	0.3451	-1.09	4032	0.8008	1.22	691	0.1143	-1.27	4509	0.921	1.3	509	0.0732	-0.9611	3153	0.6505	0.556347	-0.408503	-0.726636	-1.55789	-0.148221	-0.516801	-0.784112	0.007735
ADFP	-0.7138	3277	0.649	-0.789	3513	0.708	0.7195	1932	0.362	0.9778	1502	0.2966	1.11	1001	0.1895	-0.8791	3741	0.7539	1.08	931	0.172	1.43	226	0.0394	-0.6241	1909	0.3791	1.28759	0.386131	1.23833	1.31564	0.745527	1.44355	1.29488	1.39248
ADH1A	0.8311	2127	0.392	-0.7869	3509	0.707	1.33	455	0.073	1.37	304	0.0482	0.7928	1898	0.3758	0.9679	1592	0.3126	1.28	528	0.099	1.18	869	0.1565	-0.7982	2459	0.5076	1.27522	1.11694	1.04398	0.363062	0.407375	1.17204	1.09741	1.60741
ADH1B	1.49	199	0.023	1.7	20	0.002	-0.8191	3100	0.618	1.2	769	0.1475	-0.45	2574	0.5175	1.25	586	0.1158	-0.7926	2939	0.594	0.7375	2264	0.4433	-1.34	4649	0.9281	0.854666	0.8775	0.460836	0.98978	0.93156	1.54443	1.24656	1.50051
ADH1C	1.04	1458	0.252	1.27	654	0.106	-1.57	4944	0.988	-0.5349	2928	0.5847	-0.9928	3773	0.7638	-1.09	4242	0.8476	0.7958	1583	0.317	-1.35	4661	0.9316	1.34	288	0.0512	-0.037738	0.722793	0.418872	1.23521	0.045669	-0.1844	0.333194	-0.104626
ADH4	1.25	759	0.111	1.1	1251	0.218	0.7824	1765	0.325	-0.9895	3960	0.8006	-0.8864	3480	0.7093	-1.6	4969	0.9847	-0.6802	2617	0.526	-1.51	4886	0.9735	1.25	378	0.064	-1.04521	-0.847844	-0.244035	0.101486	-0.354562	-0.114988	-0.35902	-0.5604
ADH5	1.53	148	0.016	1.38	371	0.056	1.07	1006	0.175	-1.29	4575	0.9119	-0.5539	2685	0.5372	-1.02	4079	0.8184	0.8722	1381	0.274	-1.48	4834	0.9711	1.48	170	0.0301	-1.13843	-0.612548	-1.08515	-1.26633	-1.34086	-2.53785	-0.634954	-0.376407
ADH6	1.04	1442	0.247	-0.7211	3354	0.681	1.53	172	0.026	-0.7858	3419	0.688	-0.5786	2725	0.5371	0.8814	1866	0.3664	0.7484	1708	0.33	-0.8591	3595	0.7257	-0.8188	2543	0.4908	0.991958	0.262543	-0.63481	0.628898	0.70194	0.842755	0.559964	0.550241
ADH7	1.16	1051	0.171	-1.1	4200	0.862	1.33	467	0.074	0.9726	1526	0.2997	-1.11	4084	0.8268	1.36	323	0.0584	0.8911	1340	0.263	-1.04	4040	0.8142	-0.9864	3240	0.6568	1.15913	1.14338	-0.223971	0.614174	0.587758	1.38678	1.19398	0.964095
ADHFE1	-0.6037	3049	0.601	-0.762	3453	0.695	-0.6197	2592	0.505	-1.43	4787	0.9544	-1.45	4840	0.9617	-0.7184	3293	0.67	-0.6786	2609	0.526	0.5877	2626	0.5201	1.71	45	0.0073	1.70504	1.69631	0.97071	0.215231	0.470257	-0.692344	0.270959	1.13146
ADIPOQ	0.9444	1769	0.317	-0.5537	3078	0.609	1.2	725	0.124	1.18	818	0.1569	0.9989	1271	0.2476	1.09	1156	0.2207	0.7529	1697	0.339	1.15	949	0.1727	-1.12	3841	0.7739	0.54353	0.120227	1.06053	-0.105699	0.718938	0.662517	1.06343	1.88764
ADIPOR1	-1.46	4675	0.963	-1.43	4683	0.958	0.7381	1883	0.352	-0.9497	3863	0.7813	0.794	1895	0.362	-1.23	4490	0.9011	-0.8615	3153	0.629	-1.22	4402	0.8925	0.6842	1434	0.2575	1.67979	1.46633	1.64039	1.52615	1.62099	1.44268	1.81233	1.86134
ADIPOR2	-0.7547	3352	0.671	-0.8935	3777	0.768	0.6689	2048	0.409	-1.22	4424	0.8846	-0.6572	2872	0.5834	-1.49	4858	0.9703	-0.8768	3217	0.648	-1.46	4812	0.9664	-0.6539	1969	0.4173	-0.632794	-1.37641	-0.608772	0.225776	-0.516813	-0.24713	-0.177243	-0.288513
ADK	0.8496	2066	0.383	1.23	781	0.109	-0.7433	2891	0.58	0.5961	2653	0.5344	0.9264	1472	0.2915	0.4894	2815	0.5718	-0.9796	3560	0.716	1.19	814	0.1482	-0.8963	2865	0.574	0.489756	0.081366	1.08702	0.416781	0.171555	0.575207	1.13211	1.44668
ADM	0.8832	1970	0.36	1.28	619	0.105	0.6925	1999	0.379	-1.63	4974	0.9876	-0.6709	2900	0.5856	-1.05	4147	0.8314	-1.01	3664	0.731	-1.41	4768	0.9498	-0.6772	2041	0.4057	0.010362	-0.368328	-0.175267	0.235619	0.278979	-0.747088	0.588601	-0.463562
ADORA1	-1.37	4526	0.94	-1.15	4301	0.883	-1.33	4551	0.921	-1.04	4069	0.8221	1.26	588	0.1112	-1.25	4532	0.9018	1.38	343	0.06	0.586	2630	0.521	1.46	191	0.0324	1.29898	1.01523	1.14001	1.30973	-0.05894	-0.279941	1.09544	-0.491636
ADORA2A	-1.01	3942	0.819	-1.3	4522	0.93	0.985	1232	0.217	-0.6951	3199	0.6391	1.09	1042	0.1873	-0.4889	2900	0.5869	0.9232	1261	0.238	1.25	633	0.1198	0.6515	1487	0.2695	1.26802	0.724614	1.23097	0.070585	0.841797	0.805165	0.86502	1.18917
ADORA2B	1.25	782	0.123	0.6977	2613	0.519	1.31	505	0.082	-0.9828	3941	0.797	1.2	727	0.137	-0.5935	3014	0.6111	0.792	1594	0.306	0.8144	2029	0.3976	-1.49	4939	0.9752	-0.16981	-0.924321	-0.937458	0.343134	-0.459709	0.395088	0.452871	0.362146
ADORA3	-1.24	4325	0.902	-1.25	4446	0.911	1.14	861	0.149	0.6793	2469	0.4959	1.46	192	0.0345	-1.32	4645	0.9221	0.7852	1612	0.322	0.8166	2023	0.3936	-0.83	2588	0.5147	-0.545593	-0.173206	1.34326	0.001403	-0.093401	1.21218	0.481809	1.04291
ADRA1A	1.61	68	0.009	-0.6224	3157	0.637	1.29	551	0.088	1.65	18	0.0059	0.9445	1414	0.27	1.01	1447	0.2705	1.37	359	0.061	1.2	778	0.1429	-1.34	4660	0.9221	-1.06531	-0.355731	-1.20506	-0.986004	-1.88796	-0.52075	-1.09549	-0.890679
ADRA1B	-1.55	4790	0.979	-1.12	4241	0.87	-1.1	3927	0.794	-0.9343	3820	0.7667	1.1	1020	0.2006	-1.54	4904	0.9796	-0.8171	3011	0.61	1.36	352	0.0556	0.8429	1068	0.2267	-1.10497	-0.680022	0.580718	1.2753	0.045983	0.802829	-0.998394	-0.184932
ADRA1D	1.4	368	0.05	1.01	1561	0.285	0.9635	1290	0.227	-1.41	4764	0.9482	1.23	636	0.1186	-1.55	4918	0.9811	1.39	333	0.056	0.667	2446	0.4812	1.64	73	0.0108	1.09476	1.02763	0.577048	0.98259	-0.62886	0.597376	-0.105586	-0.213863
ADRA2A	-0.7597	3368	0.679	-1.69	4963	0.991	1.52	184	0.028	1.04	1287	0.2413	1.23	659	0.1261	0.5805	2713	0.5478	1.42	292	0.05	-0.7292	3252	0.6538	0.5267	1647	0.2956	1.17322	0.352405	0.319577	1.36656	-0.359577	1.31781	0.928592	0.879661
ADRA2B	-1.39	4577	0.947	-1.45	4697	0.959	0.6963	1988	0.374	0.7126	2386	0.476	1.36	353	0.0649	0.7098	2377	0.4877	0.6483	1931	0.393	1.28	556	0.101	-1.33	4632	0.9253	1.16708	0.768159	0.96951	1.12878	0.793383	1.86978	0.962394	1.83527
ADRA2C	-1.55	4805	0.98	0.502	2992	0.585	-1.01	3649	0.737	0.9493	1616	0.3158	0.8925	1595	0.3093	1.52	78	0.015	1.11	868	0.156	0.9599	1581	0.3011	-0.6659	2002	0.3994	0.153797	-1.25532	-2.26482	-1.13144	-0.849181	-0.477491	-1.43444	-1.17913
ADRB1	-1.61	4863	0.988	-1.57	4851	0.981	1.41	321	0.045	0.7121	2387	0.4764	0.8551	1726	0.3329	-0.8431	3647	0.7358	-1.01	3692	0.736	1.24	655	0.1215	-0.4611	1694	0.3325	1.49909	1.44181	1.3847	1.36857	1.60563	1.51076	1.3085	1.81972
ADRB2	1.46	236	0.03	0.7796	2358	0.453	0.4284	2353	0.453	-1.52	4890	0.9751	-1.1	4065	0.8199	-0.7613	3406	0.685	-1.24	4419	0.895	-1.21	4382	0.8745	0.709	1384	0.2934	1.14295	0.949431	0.089256	0.812751	0.736659	-1.70464	0.66419	0.02862
ADRB3	1.34	496	0.073	1.04	1473	0.263	1.6	102	0.014	1.23	672	0.1294	0.8001	1885	0.3674	0.8874	1848	0.3664	0.6059	2036	0.411	1.05	1272	0.238	-1.16	4044	0.8157	0.767761	0.464409	0.674349	0.298874	0.291283	1.47455	0.114776	0.514396
ADRBK1	-0.9413	3796	0.785	-0.9251	3851	0.795	0.754	1843	0.343	-1.32	4642	0.9218	1.08	1077	0.2047	-1.14	4328	0.8638	1.02	1056	0.199	0.4804	2755	0.5491	1.1	551	0.1062	1.45014	0.485555	-0.146049	1.45274	0.209976	0.334701	-0.139101	1.61056
ADRBK2	-1.76	4970	0.997	-0.6728	3252	0.65	-1.27	4404	0.895	-0.9474	3859	0.7823	1.45	212	0.0386	-0.9856	4000	0.8049	1.07	949	0.177	1.42	248	0.0452	-0.7378	2241	0.4442	-0.429369	-1.82415	-0.682441	-0.506697	-2.10837	-0.202581	-0.862564	-1.48408
ADSL	0.7276	2423	0.476	-1.35	4583	0.941	1.41	319	0.05	-0.6541	3108	0.6262	-1.46	4861	0.9658	-1.01	4072	0.8171	-1.33	4649	0.925	-1.02	4014	0.8074	-0.9967	3285	0.6673	0.419524	0.739237	0.887558	1.48191	1.45864	0.670924	0.238009	1.68607
ADSS	1.17	1013	0.163	0.8294	2192	0.416	1.39	359	0.055	-1.31	4621	0.9169	1.23	638	0.119	-1.59	4953	0.9867	-1.28	4522	0.913	-0.6437	3053	0.6089	-1.05	3551	0.7254	-0.088275	-1.89108	-0.807773	0.42543	0.871835	-0.127274	-0.69954	-0.102425
ADSSL1	-0.7806	3410	0.683	-1.53	4797	0.973	0.7544	1841	0.343	1.32	415	0.0676	0.7327	2071	0.4108	1.48	120	0.0169	1.06	971	0.19	1.02	1387	0.261	-1.48	4931	0.9818	-0.211157	-0.233667	-0.564062	-0.075183	-0.656262	1.26999	0.05527	-0.035537
AES	-1.05	4024	0.827	0.7937	2310	0.442	-1.05	3774	0.763	1.4	256	0.0462	1.01	1233	0.2402	0.7925	2126	0.4326	1.39	337	0.058	1.35	371	0.0693	1.47	179	0.0313	1.20457	0.95155	0.983981	-0.127348	-0.474637	0.577502	0.060052	0.318988
AFMID	-0.6077	3057	0.605	0.6071	2850	0.548	-0.817	3092	0.628	1.09	1085	0.2012	-0.8852	3474	0.6816	1.15	922	0.1574	-0.8927	3274	0.647	0.6307	2528	0.4802	-1.06	3605	0.7443	1.26162	1.39973	0.942081	1.31683	1.18373	0.357672	1.04745	1.91238
AFP	1.08	1316	0.221	1.55	111	0.015	-1.46	4814	0.963	-1.25	4493	0.9065	-1.19	4268	0.8662	-1.27	4565	0.913	-1.34	4671	0.926	-1.53	4909	0.9754	-0.6054	1876	0.346	-0.908365	0.332989	0.622776	0.321207	0.859912	-0.621372	0.07197	1.08335
AGA	1.37	446	0.062	0.9212	1867	0.352	-0.8352	3146	0.629	-0.987	3953	0.8	-1.48	4885	0.9711	0.9545	1634	0.3205	-1.46	4860	0.97	-1.29	4561	0.9131	-0.829	2578	0.5137	-1.18716	-1.29059	-1.05317	-1.39236	-0.363068	-1.37478	-1.17442	-0.25671
AGER	1	1591	0.272	1.24	749	0.128	-1.01	3667	0.75	0.7714	2193	0.4356	0.9032	1550	0.3037	1	1470	0.2881	0.8568	1414	0.283	1.7	15	0.0016	1.13	521	0.0973	-0.057947	-1.54333	-1.13449	-1.23087	-1.2486	-0.69925	-1.66315	-1.4529
AGK	1.05	1437	0.246	-0.8492	3668	0.752	1.48	224	0.036	1.05	1269	0.2384	-1.28	4490	0.9043	0.8338	1987	0.4005	0.6755	1869	0.367	-0.9352	3790	0.7657	-1.35	4684	0.9262	0.565005	0.814644	0.123042	1.08543	0.234509	0.893079	0.399522	1.21725
AGL	1.12	1175	0.197	0.5833	2890	0.575	0.951	1321	0.236	1.22	691	0.1325	-0.9415	3645	0.7352	1.48	121	0.0298	-0.6927	2651	0.522	-0.767	3343	0.6735	-1.37	4732	0.9336	-0.454012	-0.891761	-2.08176	-1.40739	-0.502443	0.106619	-0.053069	-0.065066
AGMAT	1.47	229	0.028	1.27	653	0.106	0.9002	1454	0.261	-0.5671	2971	0.592	0.5869	2395	0.4803	0.4812	2822	0.5724	-0.6814	2621	0.527	-0.5374	2873	0.5741	1.07	598	0.116	1.37271	0.31199	-0.99135	0.665067	-0.540484	-0.130776	-0.031603	-0.263103
AGPAT1	1.43	287	0.04	0.8507	2130	0.409	0.9578	1304	0.232	-1.04	4073	0.826	-1.13	4133	0.8367	1.09	1160	0.2197	-1.25	4450	0.887	1.05	1293	0.2376	-0.8151	2524	0.4882	0.781577	-0.882166	-0.324981	-1.44647	0.672052	-0.493075	-1.27015	-0.116768
AGPAT2	-0.7124	3273	0.648	0.5522	2940	0.572	-1.05	3789	0.766	-0.7614	3356	0.6815	-1.22	4352	0.8798	-0.876	3728	0.7525	-1.14	4119	0.828	-0.9414	3807	0.7664	-1.02	3412	0.6914	-0.13245	0.852223	0.969258	1.32091	1.33956	1.8642	0.742374	1.11795
AGPAT3	1.16	1039	0.168	1.18	973	0.163	-0.577	2512	0.488	0.9763	1509	0.2976	1.38	311	0.0566	-0.7606	3404	0.6918	1.07	948	0.176	1.26	586	0.1069	-1.22	4277	0.8607	-0.171906	-1.31001	0.227733	-0.433733	0.114699	1.6515	-0.231655	0.591461
AGPAT4	1.56	108	0.012	1.16	1005	0.172	1.45	273	0.036	1.19	801	0.1523	0.9175	1496	0.2977	0.5681	2733	0.5533	-0.6514	2538	0.512	0.9902	1492	0.2832	-0.916	2948	0.5918	-1.68406	-0.8384	-0.837164	-0.725088	-0.869878	-0.327205	-0.778049	-0.631802
AGPAT6	-1.63	4892	0.989	-1.19	4357	0.898	-1.11	3971	0.808	-1.05	4098	0.828	-0.9126	3560	0.7232	1.17	876	0.1707	-0.8318	3065	0.619	-0.8479	3559	0.7179	-0.7957	2452	0.4868	0.002178	-1.41622	-0.639052	-1.2163	0.015571	-0.81302	0.968324	-0.325326
AGPS	-1.05	4027	0.833	-1.19	4366	0.9	1.06	1030	0.18	0.9568	1583	0.2964	-1.42	4792	0.9521	1.36	331	0.0686	-1.16	4187	0.837	-1.4	4748	0.9462	0.8924	947	0.1701	1.30765	1.413	0.224671	1.32422	1.20281	1.15133	0.629957	0.758563
AGRN	-0.7373	3320	0.661	-1.12	4244	0.87	1.23	676	0.113	0.8225	2031	0.4023	-1.26	4441	0.895	1.59	41	0.0053	-1.01	3680	0.734	-0.8954	3704	0.7444	-1.62	5031	0.9959	0.628968	0.238225	0.036123	0.386267	1.36511	1.70258	1.12309	0.429427
AGRP	-0.7866	3433	0.695	-0.8012	3537	0.724	-0.7993	3046	0.608	0.8261	2021	0.3949	1.18	792	0.1469	1.18	844	0.1629	1.49	201	0.033	1.43	225	0.0422	1.31	311	0.0503	0.97614	-0.167606	-0.414764	-0.173842	-1.31663	0.222793	-0.288967	-0.029172
AGT	0.8017	2206	0.412	0.9046	1933	0.362	0.7865	1754	0.323	-0.6913	3187	0.6428	1.15	869	0.1655	-1.05	4143	0.8298	0.9962	1098	0.21	0.9945	1483	0.2805	0.9978	722	0.1426	0.593225	0.149749	0.610392	0.708583	-0.379905	1.12276	0.180865	-0.027082
AGTR1	-1.52	4737	0.973	-1.5	4767	0.969	-1.2	4211	0.859	-1.4	4744	0.9475	-1.16	4211	0.8522	0.9475	1643	0.3258	-1.58	4993	0.991	-0.6353	3035	0.6097	-0.752	2296	0.4548	1.11229	0.591248	1.17612	0.337782	1.67954	0.303942	1.29688	0.675472
AGTR2	-1.21	4282	0.892	-1.08	4166	0.854	0.9089	1431	0.257	1.09	1098	0.2168	-1.19	4286	0.8676	0.8588	1933	0.3847	-1.23	4374	0.877	-1	3961	0.7984	1.35	274	0.0489	1.28514	1.47394	0.329034	0.314348	0.352094	1.30571	0.222954	0.30432
AGXT	1.15	1078	0.178	1.09	1288	0.227	-0.7396	2882	0.571	-0.8432	3581	0.7193	-0.7366	3084	0.6077	0.4667	2834	0.5753	-1.5	4923	0.976	0.9805	1522	0.279	-0.8103	2502	0.4843	-1.01347	-0.585247	-0.897761	-1.24443	0.055011	-0.608045	-1.2637	-1.009
AGXT2	0.9837	1660	0.285	0.7447	2482	0.491	0.5768	2236	0.43	1.12	997	0.1933	1.16	842	0.1544	1.18	845	0.163	1.4	321	0.054	1.33	409	0.079	0.8264	1093	0.1981	-0.001396	-1.09716	-0.977617	-1.02597	-1.37479	-0.201025	-0.779417	-0.618298
AGXT2L1	1.25	767	0.114	1.2	889	0.142	1.16	811	0.141	1.48	126	0.0167	1.2	720	0.1374	0.758	2246	0.4604	1.46	237	0.036	1.31	485	0.0797	-0.95	3093	0.6337	0.722363	0.555559	0.701571	0.773486	-0.450991	1.68261	0.821472	0.967086
AHCY	1.55	123	0.015	1.1	1237	0.217	1.73	40	0.004	1.32	426	0.0831	0.6153	2340	0.4618	1.08	1196	0.2264	1.4	317	0.054	0.9508	1620	0.3028	0.7221	1353	0.2424	0.805288	0.768882	-0.627655	0.967905	-0.040766	0.409024	0.295162	0.030211
AHR	-1.6	4859	0.986	-1.27	4479	0.916	0.443	2350	0.452	-1.18	4373	0.876	1.12	957	0.1798	-1.52	4882	0.9723	-0.6737	2599	0.523	1.22	707	0.1305	1.3	330	0.056	0.889305	0.351193	0.441402	0.626327	0.348647	0.138162	-0.347837	1.1274
AHSG	0.5129	2846	0.568	-0.8064	3553	0.727	0.9243	1393	0.246	-0.7596	3351	0.6803	0.4724	2530	0.5093	-0.8695	3711	0.7497	-0.7392	2778	0.562	-0.7524	3310	0.6685	0.6498	1490	0.2935	0.08276	0.437222	1.01446	0.903343	0.575421	0.624301	0.604964	0.485991
AICDA	1.59	85	0.011	1.1	1246	0.218	1.31	510	0.082	1.15	910	0.1735	0.6651	2234	0.4397	-0.7674	3423	0.6899	-1.33	4664	0.924	1.2	792	0.1444	-0.7894	2428	0.4685	0.345349	0.359518	0.033051	0.16574	0.085432	0.275879	0.015486	0.234569
AIFM1	1.52	163	0.021	1.35	450	0.071	0.9206	1399	0.248	0.5957	2655	0.5304	-0.8239	3320	0.6637	1.49	98	0.0264	-1.12	4031	0.807	-0.6898	3149	0.6324	-0.7782	2394	0.459	0.819614	-0.364436	-0.567101	-1.56199	0.538976	-0.043181	-0.333951	0.460444
AIRE	0.7786	2279	0.437	1.12	1183	0.206	-0.6165	2586	0.503	1.1	1055	0.2021	1.37	339	0.0669	0.6818	2463	0.5017	1.28	512	0.088	1.35	372	0.0701	-0.5855	1843	0.337	1.59093	1.11997	0.509893	1.07885	0.25936	1.73293	1.0193	1.28164
AK1	-1.62	4880	0.989	-1.48	4739	0.969	-0.9771	3558	0.725	-1.16	4315	0.8682	-0.7914	3233	0.6493	-0.8058	3537	0.7142	-1.21	4310	0.865	-0.6031	2982	0.5955	-1.1	3780	0.7604	0.235847	0.403305	1.33963	1.14746	1.24001	1.36803	1.35683	1.2273
AK2	1.07	1372	0.234	-1.17	4328	0.887	1.53	165	0.021	1.48	127	0.0231	-0.5091	2625	0.5275	0.9807	1549	0.3019	-0.8417	3090	0.625	1.22	706	0.13	-1.16	4034	0.8141	0.173544	-0.196556	-0.108318	-0.040696	0.476118	0.701597	-0.628545	0.890926
AK3	0.9423	1778	0.315	1.03	1513	0.272	-1.1	3932	0.801	1.39	267	0.0558	1.34	389	0.0765	1.39	290	0.0578	1.41	314	0.053	1.26	589	0.1109	-1.22	4265	0.8459	0.391562	-0.869132	-0.718469	-0.302231	-0.847669	0.393528	-0.67634	0.408353
AK3L1	0.9501	1756	0.313	1.24	739	0.118	0.5975	2199	0.42	-1.33	4652	0.9237	1.32	424	0.0802	-1.08	4231	0.8454	-0.4955	2299	0.46	0.7437	2250	0.4393	-0.5536	1793	0.3529	0.235183	-0.276252	0.136562	0.160964	-0.320612	-1.26847	0.418705	-0.206221
AK5	0.8632	2033	0.376	-1.52	4795	0.975	1.77	26	0.002	0.6633	2519	0.499	-0.8258	3323	0.6645	0.7863	2143	0.4323	-1.09	3969	0.791	-1.25	4464	0.9018	-1.35	4680	0.9245	0.823433	0.707106	0.320413	1.30629	1.35729	0.987291	1.35388	0.656765
AK7	0.8852	1961	0.357	0.8132	2256	0.428	0.9257	1385	0.248	-1.42	4770	0.9512	0.6024	2362	0.4745	-1.46	4827	0.9607	-0.9073	3319	0.669	-1.34	4641	0.9292	1.55	133	0.0224	0.097244	-0.171578	-0.327806	1.14341	-0.20981	-0.561309	-0.246584	-0.8889
AKAP1	-0.9439	3801	0.777	-0.7539	3434	0.69	-0.818	3096	0.617	0.8261	2020	0.3998	-0.7577	3147	0.6309	-1.07	4209	0.8401	0.9022	1304	0.255	1	1437	0.2738	1.45	194	0.0331	1.12355	0.923366	-0.069631	0.484545	0.046238	0.284138	-0.110604	0.775996
AKAP10	1.28	682	0.105	0.7289	2522	0.5	1.22	700	0.112	0.6731	2494	0.4943	-0.8956	3503	0.709	0.9086	1773	0.3461	0.9287	1244	0.235	-1.12	4208	0.8537	-0.9299	3010	0.5916	0.725355	1.86037	0.878598	1.37728	1.3301	1.12493	1.62415	1.57421
AKAP11	-1.42	4607	0.954	0.9195	1877	0.353	-1.09	3920	0.799	-1.13	4279	0.8641	-1.05	3966	0.8008	-1.01	4074	0.8195	-0.9769	3551	0.711	-1.54	4916	0.9762	0.8971	940	0.1689	0.157449	0.411395	0.095983	0.893681	0.02834	-1.02084	0.094368	-0.081921
AKAP12	1.08	1312	0.22	1.22	814	0.138	-1.02	3688	0.753	-0.6518	3103	0.6179	-0.471	2588	0.5128	1.13	1003	0.1923	0.7056	1794	0.353	-0.7015	3177	0.6376	-1.36	4704	0.9293	-1.4945	-2.21949	-1.79631	-1.70146	-1.91462	0.268972	-0.952417	-2.3284
AKAP13	0.6658	2580	0.512	-0.9246	3849	0.794	-0.6641	2698	0.527	1.17	853	0.1601	0.4229	2550	0.5062	0.446	2846	0.5776	0.998	1094	0.197	0.9684	1562	0.2885	-0.7164	2169	0.4122	-1.00038	-0.991514	-0.057646	-1.14051	-0.405558	0.236915	-0.375369	-0.843487
AKAP3	1.13	1144	0.19	0.985	1654	0.301	0.8855	1493	0.268	-1.02	4023	0.8133	0.7029	2142	0.4248	-0.7706	3431	0.6974	1.32	449	0.079	-0.8924	3696	0.7426	-1.01	3339	0.6789	0.101666	-0.919787	-0.109321	0.928472	0.024883	0.407678	0.936125	0.189163
AKAP4	1.13	1147	0.191	1.08	1321	0.233	0.6673	2056	0.394	0.8299	2007	0.392	-1.44	4834	0.9589	0.663	2517	0.5135	-1.31	4592	0.912	-0.7327	3262	0.6558	-1.06	3604	0.7124	-1.02269	-1.97833	-1.3893	-1.16214	-1.10362	-2.09074	-0.876884	-0.978603
AKAP5	1.01	1562	0.268	-0.6523	3213	0.648	1.29	556	0.088	1.27	562	0.1074	-0.7224	3040	0.6011	1.41	240	0.0511	-1.06	3861	0.77	-0.8939	3699	0.7423	-1.39	4771	0.9429	-1.06775	-0.748254	-0.611513	-0.918934	-0.736287	0.142852	0.13189	0.828202
AKAP6	0.9396	1786	0.317	1.33	481	0.077	-1.42	4756	0.953	-1.43	4783	0.9529	0.9859	1306	0.2448	-1.06	4187	0.8399	-1.39	4769	0.946	-0.8964	3707	0.7438	-0.6764	2036	0.386	-0.987177	-1.80132	-0.279429	-0.503888	-0.312562	-0.939718	-0.212575	-0.924522
AKAP7	1.13	1154	0.192	1.31	549	0.089	1.15	830	0.14	-1.45	4808	0.9581	0.9859	1305	0.2447	1.19	798	0.1553	-0.5131	2314	0.449	1.15	955	0.1738	-0.5634	1812	0.3286	-0.274751	-0.227114	0.402069	-0.497473	-0.781025	0.334438	-0.703088	-1.07702
AKAP8	1.21	896	0.144	1.44	257	0.038	-1.16	4115	0.838	-1.13	4276	0.8639	1.39	295	0.0601	0.8684	1914	0.3757	1.17	723	0.129	0.8608	1885	0.3651	-1.43	4866	0.9596	0.35548	-0.673985	-1.50645	0.78884	0.340246	0.977112	0.866812	0.057304
AKAP9	1.14	1125	0.187	-0.9235	3847	0.794	1.36	415	0.066	1.28	522	0.0991	-1.05	3965	0.8003	-0.7711	3435	0.6919	0.4913	2196	0.428	0.6466	2491	0.5008	-0.9163	2952	0.5777	0.575662	0.789392	1.18044	0.703451	1.03073	0.307564	1.18752	1.22801
AKR1A1	-1.13	4178	0.867	0.7809	2351	0.465	-0.9796	3567	0.726	-0.6523	3105	0.6184	-0.7123	3011	0.5961	1.33	391	0.0802	-1.28	4531	0.901	1.22	731	0.1369	-1.14	3953	0.7878	-0.620174	-1.26599	-2.05409	-2.46784	-0.35973	-0.941099	-0.662156	-0.081513
AKR1B1	-0.5903	3026	0.606	-0.661	3226	0.652	-0.6924	2756	0.544	-1.03	4057	0.8197	-1.13	4146	0.839	-0.7938	3500	0.708	-0.8238	3033	0.613	-1.01	3969	0.7994	0.7179	1360	0.2675	0.392651	-0.261565	0.086979	0.161928	-0.512808	-0.475467	-0.445635	-0.078593
AKR1B10	-0.5584	2980	0.599	-0.9131	3817	0.789	1.44	282	0.043	1.34	387	0.0773	0.9683	1352	0.257	1.08	1188	0.2246	-1.1	3988	0.796	1.23	675	0.1281	-1.43	4860	0.9593	-0.053612	-0.786593	0.03729	0.058658	0.211251	0.200064	0.497322	0.493834
AKR1C1	1.39	394	0.053	1.43	273	0.038	-1.44	4793	0.964	0.7448	2284	0.4545	-1.36	4666	0.9337	0.6859	2451	0.5013	-0.9559	3481	0.702	0.8907	1808	0.3453	0.8642	1020	0.2003	-1.46278	-1.19836	-1.19982	-0.448763	-1.6439	-2.04128	-0.979854	-2.06175
AKR1C2	1.02	1525	0.266	1.22	810	0.126	-1.17	4119	0.844	1.08	1121	0.2197	-1.09	4034	0.8157	1.4	266	0.0459	-1.28	4523	0.906	0.8888	1820	0.3468	-1.02	3395	0.6879	-0.621496	-0.6827	-1.70328	-1.56164	-0.659519	-0.435804	-2.0197	-0.152179
AKR1C3	-1.28	4408	0.922	-0.9225	3845	0.793	-1.32	4547	0.918	-0.7428	3305	0.6638	-0.9126	3558	0.7198	-1.2	4423	0.8901	-1.03	3738	0.746	-1.3	4589	0.9218	-0.6634	1994	0.3781	-0.362632	0.131115	0.010279	1.49827	0.654282	-0.192248	0.90795	0.560977
AKR1C4	-0.5959	3038	0.607	-0.9429	3894	0.805	-0.761	2941	0.585	-0.9496	3862	0.7813	-0.8641	3412	0.6886	0.8952	1823	0.3559	-1.11	3999	0.8	-0.8038	3432	0.6955	-0.8288	2577	0.5005	-0.198277	-0.097849	-0.516733	-0.235808	0.492259	-0.091723	0.424971	1.17783
AKR1D1	-1.04	3999	0.824	-0.7521	3430	0.689	-0.5542	2477	0.48	-0.6411	3083	0.6198	0.7486	2016	0.3972	0.9329	1697	0.3356	-0.7588	2836	0.573	-0.7196	3228	0.6508	-1.12	3862	0.7788	0.039068	0.120993	0.347763	1.32665	0.859616	0.324841	0.781468	1.24918
AKT1	-0.7437	3330	0.664	1.39	359	0.053	-1.33	4550	0.92	0.9535	1594	0.3128	0.9387	1430	0.2845	1.16	911	0.1758	0.8487	1435	0.287	1.12	1061	0.1987	-1.31	4580	0.9146	0.286457	-0.329208	-0.67094	0.211144	-0.309112	0.612084	0.833893	0.76868
AKT1S1	-1.25	4342	0.907	-0.9087	3800	0.775	-1.22	4254	0.868	-1.14	4290	0.8595	0.4956	2511	0.5069	0.6638	2515	0.5074	-1.3	4564	0.919	-0.4742	2813	0.5568	-0.9504	3097	0.6338	0.858271	0.805154	1.2803	1.32626	1.57062	1.76775	1.38975	1.24456
AKT2	1.29	648	0.094	-1.16	4316	0.884	1.71	48	0.004	-0.7754	3388	0.6847	0.8638	1687	0.3364	-0.9271	3855	0.7702	1.01	1077	0.21	1.09	1174	0.2164	1.42	220	0.0439	1.42541	1.40817	1.00771	0.946846	0.609558	1.11231	1.01114	0.857554
AKT3	1.31	581	0.086	1.42	282	0.042	1.06	1040	0.182	0.8236	2025	0.3965	-0.8962	3506	0.7094	-1.06	4185	0.8396	-0.8442	3100	0.617	-1.06	4077	0.8286	0.7498	1284	0.2303	-1.07548	-1.22671	-0.979455	-0.186719	-1.31534	-0.753437	-0.790439	0.480112
AKTIP	1.3	603	0.086	1.24	769	0.122	0.9057	1440	0.258	1.25	589	0.105	-0.4592	2579	0.5218	-0.7779	3457	0.6931	-0.5214	2326	0.481	0.7353	2270	0.4442	-0.6852	2060	0.4335	-0.788347	-0.207546	0.19982	0.484943	-0.655942	0.499291	0.01708	0.615114
ALAD	1.08	1307	0.22	1.19	922	0.146	-0.7085	2802	0.569	-0.6738	3156	0.6325	-1.32	4599	0.9265	0.8927	1829	0.368	-1.04	3796	0.763	-1.05	4059	0.8073	-0.9691	3183	0.652	-0.127391	0.369586	0.821698	-0.361018	-0.026483	-0.747407	0.052675	0.167437
ALAS1	0.6351	2648	0.514	0.9028	1942	0.363	-0.7545	2922	0.579	1.31	441	0.0788	-1.15	4198	0.8485	1.25	594	0.1165	0.432	2228	0.45	-1.13	4230	0.8547	-1.01	3358	0.6829	-0.27097	-0.527507	-1.93119	-0.602977	-0.924368	-0.631569	-1.25759	-1.40139
ALAS2	1.14	1109	0.182	-1.18	4343	0.891	1.48	222	0.03	-0.6844	3178	0.6398	-1.32	4592	0.9209	-0.4783	2888	0.5859	-0.7629	2850	0.575	-0.8484	3562	0.7181	1.67	61	0.011	1.14285	1.03598	0.265949	1.02704	0.072533	0.089449	0.04431	0.177595
ALB	0.6888	2543	0.5	-0.6235	3160	0.637	0.8166	1664	0.309	0.9248	1688	0.3387	-0.9988	3794	0.7621	1.44	178	0.0253	-0.7483	2805	0.572	0.9631	1574	0.3028	-0.8696	2754	0.5628	0.926437	0.350802	0.088915	-0.246905	0.551819	0.806364	-0.144352	0.749939
ALCAM	1.45	263	0.035	1.52	153	0.017	1.42	317	0.044	0.651	2546	0.5099	0.7778	1936	0.381	0.7546	2253	0.4585	-0.6491	2530	0.511	1.11	1104	0.2059	-0.5016	1730	0.3387	-0.316213	-0.709686	-0.679082	-0.860617	-0.5886	-0.947213	-1.12761	0.409305
ALDH18A1	0.6908	2538	0.484	0.5993	2859	0.558	0.6544	2083	0.395	0.6791	2470	0.4959	-0.659	2877	0.5801	0.8103	2056	0.4199	-1.02	3718	0.741	1.1	1128	0.2102	-1.18	4086	0.8224	-0.093607	-0.581058	0.251998	-1.22478	0.391194	0.543128	0.399896	0.40519
ALDH1A1	0.8111	2182	0.415	0.7963	2307	0.453	-0.6571	2670	0.524	-1.73	5019	0.9946	-1.27	4475	0.9018	-1.28	4573	0.9149	-1.04	3802	0.756	-1.7	5020	0.9944	0.6418	1500	0.2734	-0.066705	1.17409	0.816075	1.2489	1.61124	-0.217083	0.978137	0.450709
ALDH1A2	1.02	1541	0.264	1.09	1290	0.228	0.9166	1412	0.251	0.953	1597	0.3131	-0.833	3342	0.678	1.14	948	0.185	-1.27	4492	0.898	-1.57	4943	0.9821	-1.33	4623	0.9238	-1.28582	-1.28935	-1.83439	-1.307	-1.43583	-0.150125	-0.742085	-0.672287
ALDH1A3	1.32	566	0.084	1.57	91	0.012	-0.8845	3291	0.662	1.07	1168	0.2222	0.8361	1773	0.3337	0.6081	2645	0.5379	1.72	26	0.005	0.7559	2209	0.4387	0.7088	1385	0.2479	-1.91354	-0.426124	-1.36919	-1.6789	-2.18944	-0.185292	-1.22154	-0.585051
ALDH1B1	-0.6708	3183	0.635	-1.43	4679	0.958	1.47	238	0.037	-1.26	4496	0.9076	-1.51	4911	0.9737	-0.9081	3811	0.7662	0.9266	1252	0.236	-0.7192	3226	0.6478	1.09	576	0.1029	-0.752052	-0.419223	-0.571931	-0.911929	-0.806758	-1.58325	-0.384029	-0.276835
ALDH1L1	1.17	1025	0.169	1.05	1411	0.253	0.7543	1842	0.343	-0.511	2904	0.5742	-0.8937	3498	0.7077	1	1464	0.2746	-0.6822	2626	0.517	0.9983	1461	0.2686	-0.7098	2139	0.4093	0.710308	0.026256	0.745939	-0.136892	0.306407	-0.870823	-0.071511	-0.339024
ALDH2	1.31	590	0.088	-0.6546	3218	0.649	1.43	297	0.045	0.8223	2032	0.4024	-0.8629	3411	0.6964	0.3959	2864	0.5806	1.09	915	0.168	1.56	77	0.0107	-0.5466	1780	0.3502	-0.725021	-0.282755	-0.508137	-0.081329	-0.521573	0.755516	-0.48128	-0.76324
ALDH3A1	0.4865	2866	0.572	-0.8662	3707	0.763	1.2	723	0.117	1.21	712	0.1361	-0.9243	3588	0.7256	-0.7857	3483	0.6994	0.8206	1525	0.291	-0.9264	3777	0.7611	1	716	0.1319	-0.752698	-0.425058	0.175991	0.626827	-0.469868	0.283882	0.93735	-0.173872
ALDH3A2	-1.07	4059	0.835	-0.5557	3079	0.609	-0.6205	2597	0.505	1.42	229	0.0388	-0.9303	3613	0.7323	0.8493	1952	0.3921	-0.7092	2695	0.543	0.9	1772	0.3392	-1.15	3980	0.8032	-0.538929	-0.489655	-0.894041	-2.18906	-1.05577	0.209819	-0.941261	0.051393
ALDH3B1	-0.473	2919	0.572	-0.9108	3812	0.776	1.44	289	0.039	-1.35	4674	0.9299	1.25	605	0.1111	-1.3	4609	0.9144	-0.878	3224	0.648	0.7092	2342	0.4585	-0.6595	1985	0.42	1.45218	0.833218	1.30615	1.42437	1.10449	1.30685	0.922314	1.43674
ALDH3B2	1.44	271	0.036	-0.9544	3919	0.8	0.905	1443	0.259	0.9013	1772	0.349	-1.43	4803	0.9556	1.31	445	0.084	0.5521	2130	0.43	0.6978	2366	0.4653	-1.06	3609	0.7251	1.69908	1.66037	1.04262	0.420912	1.27063	1.44739	1.16812	0.693951
ALDH4A1	-1.35	4507	0.937	0.8316	2188	0.424	-1.42	4745	0.951	1.31	451	0.0871	-1.12	4118	0.8339	1.17	865	0.1672	0.791	1599	0.307	-0.6079	2988	0.5958	-0.9945	3274	0.6509	1.69156	1.43121	0.69108	1.27221	1.03189	1.67538	1.49169	1.46352
ALDH5A1	-0.9883	3894	0.81	1.4	320	0.05	-1.43	4766	0.955	1.28	533	0.097	1.19	739	0.1457	0.7909	2129	0.4337	1.36	386	0.068	1.61	46	0.0064	-1.02	3422	0.6926	-0.456758	-1.07527	-0.533019	-1.16533	-1.3535	-0.143193	-0.893991	0.206024
ALDH6A1	1.67	33	0.004	1.22	818	0.139	1.6	98	0.014	0.922	1698	0.3225	-0.9407	3642	0.735	0.9719	1581	0.2969	-1.05	3831	0.762	-1.76	5032	0.997	-1.39	4781	0.9442	-0.749494	-0.355842	-0.942966	-0.66014	-0.561099	-0.291934	0.204257	-0.067029
ALDH7A1	-1.29	4421	0.917	0.8575	2109	0.397	-1.22	4256	0.868	-0.6753	3161	0.6362	-1.16	4209	0.8512	-1.53	4898	0.9743	-1.69	5032	0.998	-0.9197	3763	0.7558	1.27	367	0.0609	-0.763292	0.43686	1.11154	0.802165	0.590799	1.5704	0.812864	-0.973118
ALDH9A1	1.03	1505	0.259	-1.09	4182	0.857	1.51	195	0.025	-0.903	3733	0.7586	0.9286	1464	0.2904	1.02	1420	0.2746	-0.7674	2860	0.578	0.6696	2437	0.482	-0.933	3024	0.6073	0.398189	-0.156779	-0.119711	0.402165	0.33267	0.371813	0.759894	0.331223
ALDOA	-0.7772	3405	0.681	1.37	399	0.06	-1.4	4725	0.952	0.5191	2769	0.5486	1.21	685	0.1293	-1.2	4434	0.8809	1.43	281	0.045	0.6651	2450	0.4821	1.06	614	0.1297	0.213815	-0.610294	-0.89046	0.347818	-1.43224	-0.641914	-0.742222	-0.510383
ALDOB	-0.9158	3744	0.763	-0.813	3572	0.723	0.8202	1655	0.305	-1.28	4557	0.9087	-0.9097	3546	0.7221	0.9998	1475	0.2889	-0.7044	2676	0.539	-1.11	4202	0.8478	-0.9413	3052	0.6148	1.72439	1.19358	0.04815	1.04574	0.800387	0.429296	0.151053	0.150143
ALDOC	0.937	1795	0.323	1.33	483	0.073	-0.9789	3563	0.722	1.45	177	0.0318	1.52	117	0.02	0.598	2679	0.5433	1.39	338	0.058	1.16	921	0.17	-0.5494	1785	0.3513	-1.87814	-2.47233	-2.11791	-2.23857	-2.88298	-0.94477	-2.2723	-2.64136
ALG1	0.5318	2824	0.553	-1.3	4525	0.926	0.7974	1725	0.317	-1.45	4806	0.9579	-0.762	3155	0.6329	0.7237	2339	0.4792	-1.24	4423	0.886	-1.02	3994	0.8041	0.7145	1371	0.2686	0.492252	-0.02535	-0.400506	0.370607	0.365535	-0.186135	-0.073532	0.370976
ALG10B	-1.38	4541	0.942	0.9511	1759	0.329	-1.43	4764	0.96	0.736	2315	0.4603	0.6295	2310	0.4624	1.15	939	0.182	-1.07	3892	0.778	-0.6247	3014	0.6051	-1.29	4535	0.904	-1.9546	-2.37672	-1.87041	-2.0603	-1.06804	-0.682612	-1.36266	-0.537074
ALG11	0.903	1908	0.345	1.43	267	0.038	-1.8	5032	1	-0.9441	3848	0.7807	-0.6611	2881	0.5815	1.23	672	0.1312	-1.03	3775	0.75	-1.22	4405	0.8857	-1.04	3518	0.708	0.132662	0.062608	-0.720961	0.120063	-0.105585	0.381993	0.427011	0.705304
ALG12	0.8634	2032	0.371	1.25	713	0.115	-1.15	4074	0.826	1.3	469	0.0837	1.38	322	0.0592	1.08	1175	0.2257	1.34	415	0.073	0.9067	1750	0.3352	-0.9097	2923	0.5857	0.849426	0.369199	0.79974	1.00741	0.23203	0.825251	1.60694	1.08068
ALG13	1.04	1460	0.251	1.14	1091	0.191	0.8319	1615	0.299	1.24	636	0.1219	0.6973	2160	0.422	-0.6408	3125	0.6302	-0.5491	2355	0.459	1.03	1345	0.2466	-1.08	3699	0.7322	-0.145633	-0.193341	0.528975	-0.059262	0.176548	1.22034	0.638196	0.436904
ALG14	-0.8004	3467	0.696	-0.6312	3175	0.631	-0.9664	3531	0.713	-1.13	4273	0.8598	-1.19	4266	0.8645	-1.29	4588	0.9121	-1.44	4838	0.967	-1.27	4505	0.9028	-0.8633	2728	0.5435	-0.113245	0.147055	1.05824	1.23948	1.4331	-0.357242	0.511325	0.350894
ALG2	-0.6165	3075	0.604	0.4055	3028	0.594	-0.8603	3222	0.644	-0.4472	2856	0.5662	-1.69	5021	0.9982	-0.578	2988	0.6046	-1.16	4162	0.843	0.9672	1565	0.2998	1.44	205	0.0403	1.21714	1.01514	0.404939	0.574281	1.27056	0.265828	-0.555415	0.598603
ALG3	0.983	1661	0.291	0.6613	2711	0.526	-0.524	2428	0.471	1.29	494	0.0872	0.5514	2447	0.4921	1.17	869	0.1697	1.36	380	0.068	0.8013	2073	0.4037	-0.7719	2369	0.47	1.46738	1.52002	0.746664	0.631395	0.340926	1.72331	0.649842	1.77089
ALG5	0.8485	2072	0.381	1.02	1526	0.277	0.785	1759	0.324	1.25	604	0.1149	-1.28	4500	0.9046	1.05	1319	0.2521	-0.5956	2425	0.487	1.05	1273	0.2384	-1.16	4006	0.8089	0.428522	-0.258233	-0.576023	-1.42501	-0.376561	0.928795	-1.11033	0.142416
ALG6	-1.14	4191	0.868	-0.9238	3848	0.784	-0.6233	2600	0.507	1.01	1394	0.2735	-1.36	4677	0.9364	-1.29	4593	0.913	-0.9994	3629	0.728	-0.8876	3679	0.7392	-0.7452	2273	0.4499	0.419322	1.04444	1.1971	1.26627	1.45899	1.15127	0.934091	1.55878
ALG8	1.34	521	0.073	1.21	875	0.14	-0.749	2907	0.574	1.21	740	0.1415	1.1	1010	0.1924	0.8299	2003	0.4063	1.43	283	0.049	1.21	765	0.1392	-0.9105	2926	0.5866	-0.42491	-0.711384	0.574848	-0.209449	-0.243973	0.252555	0.054399	0.420181
ALG9	-0.8996	3696	0.753	-0.9174	3832	0.78	0.9871	1225	0.216	0.8181	2045	0.4052	0.7954	1893	0.3708	-0.7984	3514	0.71	0.879	1365	0.27	0.8829	1834	0.3492	-0.8371	2613	0.521	0.245089	-0.351147	-0.30471	0.045397	-0.799307	0.352322	-1.02257	-0.220456
ALK	0.6932	2533	0.497	0.6455	2758	0.548	1.14	857	0.145	1.33	395	0.0789	-1.29	4514	0.9083	1.06	1271	0.2389	-1.25	4454	0.887	0.7117	2332	0.4647	-1.72	5045	0.9986	-0.410932	0.221176	0.639605	0.855853	1.02056	1.79209	0.161832	1.06745
ALKBH2	-0.864	3605	0.732	-0.9357	3874	0.79	0.6672	2057	0.388	1.26	579	0.1092	-1.07	3994	0.803	1.3	469	0.0878	-1.19	4258	0.855	-0.747	3295	0.6656	-1.27	4467	0.8927	-0.133497	0.209917	0.828875	0.225728	1.14627	1.70823	1.26953	0.701535
ALKBH3	1.12	1190	0.2	0.9349	1814	0.342	0.93	1374	0.244	1.01	1392	0.2742	1.14	899	0.1727	-0.8087	3546	0.7105	1.38	357	0.063	1.31	463	0.0766	-0.9511	3104	0.6348	-0.171666	-1.22875	-1.22505	-0.210911	-1.04677	-0.286418	-0.081694	-0.628436
ALLC	1.2	923	0.145	1.71	17	0.001	-1.17	4129	0.839	1.04	1309	0.2546	0.8125	1847	0.3597	1.38	295	0.0512	0.6154	2014	0.408	1.38	319	0.0601	-0.7648	2340	0.4633	-0.935601	-1.87334	-1.59405	-2.52902	-2.13442	-1.94446	-1.72561	-1.24446
ALMS1	-0.5343	2959	0.592	0.8858	2012	0.381	-1.11	3960	0.805	0.964	1560	0.3048	-1.22	4351	0.8798	-0.7501	3377	0.6858	-1.39	4768	0.951	0.6743	2422	0.4789	-1.32	4613	0.92	-0.810451	-0.001499	0.406338	0.12306	1.06136	-0.580971	-0.826137	0.377178
ALOX12	0.6967	2525	0.481	0.6528	2734	0.53	-0.8928	3321	0.666	0.9471	1626	0.317	1.24	617	0.1172	0.9402	1666	0.3305	-0.9567	3485	0.702	0.9945	1481	0.2805	-1.11	3812	0.7663	0.904653	0.122319	0.108005	1.29928	0.417904	1.43378	0.61692	0.95925
ALOX12B	0.6205	2681	0.521	0.4171	3024	0.594	-0.6038	2554	0.498	-1.14	4289	0.8623	-0.57	2706	0.5415	-1.62	4983	0.9864	-0.5988	2429	0.488	-1.07	4095	0.8271	1.13	514	0.0955	1.11405	0.730586	0.942308	1.75565	0.882829	0.673933	0.199856	1.46164
ALOX15	0.8637	2031	0.37	-0.7099	3332	0.668	0.8702	1532	0.278	-0.6773	3166	0.6371	-0.6813	2930	0.5913	-0.9495	3905	0.7883	-1.01	3697	0.736	0.8504	1923	0.3715	-1.16	4023	0.8116	-0.593148	-0.875484	-0.165781	-0.951465	-0.541647	-0.104687	0.166581	0.176645
ALOX15B	-1.25	4339	0.905	-1.54	4814	0.976	-0.8847	3293	0.66	0.6688	2506	0.5011	1.09	1031	0.1963	-1.23	4485	0.8941	1.12	837	0.153	1.27	580	0.106	-0.6702	2012	0.402	-0.82683	-1.35424	-0.710913	-1.21742	-0.981221	0.008825	-0.964678	-0.284892
ALOX5	0.6222	2674	0.521	0.6395	2776	0.538	-0.6094	2571	0.499	0.5082	2782	0.5578	-0.9748	3729	0.7558	0.5273	2781	0.5644	-0.7849	2907	0.589	0.6468	2490	0.4925	0.7482	1287	0.2543	-0.803479	-0.710208	0.229485	-0.548655	-0.326955	-1.17283	-0.522452	0.544885
ALOX5AP	1.16	1029	0.17	0.8397	2158	0.417	0.8427	1592	0.293	0.6818	2458	0.4889	0.5173	2491	0.4936	0.7108	2374	0.4841	0.8689	1386	0.265	0.9201	1708	0.3226	0.8244	1100	0.1993	0.646198	0.480654	0.188876	0.508688	0.056393	0.771312	0.111688	0.074148
ALPI	0.6087	2704	0.539	1.28	639	0.108	-1.15	4083	0.831	1.3	472	0.0838	-1.19	4272	0.8649	1.49	106	0.0199	-0.6824	2627	0.527	-1.22	4407	0.8862	-1.34	4674	0.9306	-0.487097	0.309443	-0.394224	-0.095205	0.767446	1.18598	0.054382	0.483185
ALPL	1.12	1186	0.197	0.983	1659	0.307	-0.5563	2481	0.481	0.9681	1543	0.3061	-0.8073	3272	0.6611	-1.55	4915	0.9811	0.8327	1489	0.308	-0.7486	3298	0.662	0.9967	727	0.156	-2.41579	-0.757022	0.141297	0.305131	-1.37351	-0.300057	-0.471049	-0.279542
ALPP	-0.8584	3598	0.73	-0.6249	3161	0.629	0.5968	2201	0.421	-1.2	4405	0.8842	1.13	928	0.1752	-0.5944	3015	0.6136	-0.5385	2342	0.47	0.7911	2099	0.4107	-1.35	4697	0.936	-0.39576	-0.115625	0.471695	0.01258	0.367826	0.323435	0.1092	1.42547
ALPPL2	0.8465	2079	0.389	0.6965	2619	0.52	0.542	2290	0.439	-1.06	4127	0.8349	1.59	64	0.015	-1.38	4734	0.9437	0.5609	2115	0.413	0.785	2123	0.4191	0.7903	1192	0.214	1.58509	0.978849	1.41932	1.66051	1.29887	1.32672	1.27852	0.898275
ALS2	-0.6333	3103	0.61	-1.5	4764	0.969	1.41	318	0.045	-0.7537	3333	0.6769	0.6962	2165	0.4286	0.8898	1839	0.3648	0.8154	1539	0.307	-1.01	3967	0.7991	0.8227	1105	0.2199	-0.169293	-0.408648	-1.06622	-0.309193	-1.19355	-0.836918	-0.003787	-0.509608
AMD1	0.8606	2037	0.372	1.08	1329	0.236	-1.14	4031	0.817	1.09	1118	0.2194	0.5087	2502	0.5027	0.9737	1574	0.3059	-1.12	4055	0.814	-0.5661	2915	0.5822	-1.09	3753	0.7529	-0.982732	-1.60706	-1.34502	-0.805958	-0.985061	0.060341	-1.31647	0.179271
AMDHD1	1.5	183	0.024	1.42	286	0.043	1.09	969	0.168	0.4061	2848	0.5658	0.8648	1681	0.3169	0.9807	1550	0.291	-1.49	4904	0.975	1.47	173	0.0307	-1.03	3436	0.6828	-0.339718	-2.15665	-1.4581	-1.4821	-1.25373	-0.918675	-2.04542	-0.493565
AMDHD2	0.536	2819	0.564	0.8521	2124	0.407	-1.12	3995	0.815	-0.8687	3644	0.7342	-1.04	3916	0.7936	1.21	737	0.143	-1.49	4896	0.973	0.7864	2116	0.4181	-0.9434	3064	0.6056	1.06467	0.42308	-0.416397	-0.651068	1.55926	-0.014338	0.023169	0.856951
AMH	-0.987	3891	0.81	0.8493	2134	0.409	-1.23	4290	0.876	1.02	1348	0.2522	1.17	824	0.1512	1.39	273	0.0558	0.5126	2172	0.425	1.18	873	0.1591	-1.41	4816	0.9511	0.371578	0.211992	0.781093	0.637031	0.293377	1.22388	0.375892	1.57749
AMHR2	0.9078	1893	0.34	1.24	736	0.126	-0.7242	2846	0.563	1.49	121	0.0263	-0.9281	3604	0.7276	0.4642	2836	0.5754	0.8331	1486	0.284	1.33	421	0.0816	-0.5686	1817	0.3307	-0.050432	-0.1456	0.357614	-1.18481	-0.86825	0.836891	-0.929485	1.1241
AMOTL1	0.8442	2083	0.391	1.09	1278	0.226	-1.33	4565	0.923	0.5939	2659	0.5312	0.8999	1567	0.2962	0.5951	2685	0.5426	-1.07	3899	0.778	-0.9742	3889	0.7862	-0.8555	2695	0.5244	0.406394	0.156668	0.657365	0.381018	0.678234	0.350868	0.072561	1.01805
AMPD1	0.7352	2402	0.471	0.6423	2765	0.55	0.7429	1871	0.348	-0.8086	3482	0.6995	-1.27	4467	0.9005	-1.13	4321	0.8675	-1.34	4677	0.927	-1.05	4054	0.8227	1.33	292	0.0463	1.19399	1.16108	0.968807	1.51406	1.35285	0.815387	0.53487	0.829622
AMPD2	-1.69	4933	0.995	-0.5576	3082	0.61	-1.35	4605	0.932	-1.31	4612	0.9161	1.07	1102	0.2087	-1.02	4095	0.8211	-0.7799	2891	0.586	1.03	1366	0.2575	-0.7876	2422	0.4812	0.544469	0.490605	1.50331	-0.101634	1.13408	0.523544	0.434634	1.43125
AMPD3	1.11	1229	0.202	1.11	1220	0.214	-0.8886	3302	0.663	-1.04	4064	0.821	-0.526	2648	0.5305	-1.24	4505	0.8974	-1.33	4648	0.925	0.6916	2385	0.4686	1.09	567	0.1103	0.796599	0.320224	-0.139103	-0.173495	0.073931	0.181605	-1.27476	0.456374
AMPH	1.16	1027	0.17	1.09	1291	0.228	0.871	1531	0.277	0.739	2305	0.4506	0.8473	1753	0.3275	-1.08	4214	0.8453	1.15	792	0.138	0.9659	1568	0.2909	0.7132	1374	0.2461	-0.272689	-0.55024	-0.136417	-0.961372	-1.61069	-0.254696	-0.634371	-0.985776
AMT	0.7502	2361	0.448	-1.2	4380	0.897	1.11	918	0.159	-1.64	4982	0.9888	1.1	1003	0.1906	-1.63	4989	0.9887	-0.7851	2908	0.589	0.7905	2100	0.4111	1.59	100	0.0186	0.69689	-0.071974	0.305188	0.166809	-0.464777	-0.848669	-0.194435	-1.25921
AMY1A	1.22	857	0.132	0.8897	1996	0.373	1.02	1123	0.201	0.4909	2801	0.5617	-1.34	4642	0.9301	0.812	2054	0.4187	-1.07	3896	0.778	-1.36	4686	0.9361	-1.39	4768	0.9489	-0.05273	1.18715	0.647208	0.39942	1.2571	0.669823	1.38919	0.5692
AMY1B	0.6672	2578	0.498	0.5927	2872	0.56	1.14	860	0.149	1.42	231	0.0391	-0.7496	3133	0.626	1.29	494	0.0947	-0.7233	2734	0.552	-0.6468	3060	0.6143	-1.53	4978	0.9868	0.11753	-0.419544	-0.436793	-0.227652	0.064707	-0.156491	-0.083759	0.615336
AMY1C	-0.7187	3290	0.651	0.6422	2767	0.536	0.783	1762	0.325	-0.9587	3886	0.7788	-1.67	5018	0.9978	0.6727	2486	0.5031	-1.67	5029	0.999	-0.718	3222	0.6449	0.6197	1553	0.3295	0.576979	0.745371	0.281118	0.651478	1.87727	-0.314384	0.177927	0.553138
AMY2A	0.8747	1996	0.363	0.8037	2282	0.434	-0.6988	2768	0.545	1.21	741	0.1415	-1.61	4989	0.9904	1.19	781	0.1526	-1.49	4905	0.978	-1.17	4304	0.8696	-1.14	3945	0.7976	-1.32827	-0.933479	-0.885947	-1.05356	1.03488	-1.18131	-0.355224	-0.296823
AMY2B	-0.6165	3076	0.604	-0.8692	3717	0.755	0.6477	2096	0.398	-1.44	4797	0.9565	-0.8891	3488	0.7103	0.4346	2854	0.5782	-1.26	4464	0.893	-1.51	4888	0.9735	-0.9744	3205	0.6442	-0.415168	-0.636059	-0.724782	0.357429	0.604015	-0.518679	0.716067	0.097729
ANAPC1	-1.46	4681	0.962	0.9526	1754	0.328	-1.78	5029	1	0.9736	1523	0.2991	-0.4968	2613	0.5247	0.7966	2109	0.4298	0.7573	1687	0.337	-0.6901	3151	0.6353	-0.9102	2925	0.5861	0.007146	0.027584	-1.28537	0.057247	0.159909	0.533974	-0.000559	-0.406333
ANAPC10	0.7882	2242	0.422	1.12	1168	0.202	-1.04	3749	0.758	1.47	146	0.0277	-1.2	4305	0.8701	1.39	277	0.0476	-0.9672	3522	0.707	0.7105	2337	0.4568	-1.3	4538	0.9044	-0.881501	-1.37068	-1.67672	-0.668907	-0.679556	-1.03236	-0.990605	-0.825103
ANAPC11	-0.9207	3757	0.765	0.7187	2564	0.493	-1.23	4274	0.872	-0.744	3311	0.6714	0.5545	2443	0.4913	1.3	463	0.0863	-0.7912	2935	0.593	-0.7122	3207	0.6469	-1	3319	0.6737	0.208357	0.248216	0.510317	0.484906	0.700389	0.336534	0.803846	0.670083
ANAPC2	-1.67	4920	0.994	-1.3	4520	0.924	-1.31	4501	0.911	1.04	1294	0.252	1.54	100	0.0153	0.9407	1664	0.3303	1.13	823	0.15	1.11	1081	0.2033	-0.4979	1727	0.3382	-0.075483	-2.07129	-1.40473	0.021693	-1.89444	-1.29734	-0.956535	-0.317043
ANAPC4	-1.54	4775	0.977	-1.85	5024	0.999	1.05	1056	0.187	0.6592	2529	0.506	1.07	1092	0.2072	1.05	1310	0.2513	0.7021	1802	0.366	1.19	815	0.1486	1.01	699	0.1395	-0.641221	-2.10152	-1.29764	-0.441507	-1.04164	-0.976134	-1.76039	-0.955603
ANAPC5	-1.39	4569	0.945	-0.9608	3933	0.803	-0.7448	2900	0.571	0.8963	1798	0.3524	0.987	1301	0.2552	1.16	918	0.1769	-0.9686	3527	0.708	1.16	935	0.1721	-1.15	3970	0.8018	-0.048515	-0.783484	-0.377398	-0.108282	0.529942	1.23462	0.032644	0.19092
ANAPC7	0.6786	2565	0.505	-1.05	4118	0.847	1.03	1114	0.197	-1.29	4586	0.9187	-0.9807	3743	0.7585	0.7355	2305	0.4677	-1.02	3723	0.743	-1.16	4274	0.8701	-0.622	1907	0.3535	0.228373	-0.810676	-1.14604	0.024758	-0.573192	-1.37567	-0.219972	-0.95032
ANGPT1	0.8724	2006	0.369	1.48	213	0.028	-0.5359	2443	0.475	-1.51	4884	0.9714	-0.6435	2841	0.562	-1.22	4478	0.8997	-0.6782	2608	0.515	-1.48	4836	0.9644	-0.659	1983	0.3746	-1.21007	-1.14831	-1.10802	0.374148	-0.552234	-1.01721	0.311072	-0.651024
ANGPT2	1.68	29	0.003	1.37	378	0.059	1.54	154	0.023	1.17	859	0.1611	-1.69	5022	0.9959	0.9048	1790	0.3494	-1.62	5014	0.993	0.5155	2722	0.5475	-0.5428	1771	0.3217	-0.178284	-0.235546	-0.290803	-1.14873	0.237967	0.100665	-0.449195	-0.59736
ANGPTL2	1.1	1260	0.21	0.6992	2609	0.506	1.19	745	0.127	-1.02	4022	0.8098	1.26	589	0.1055	1.46	144	0.0215	-0.7686	2865	0.583	0.9165	1725	0.332	-1.1	3782	0.7729	1.41365	0.799491	-0.493542	0.21973	0.448394	0.818975	0.18911	1.31578
ANGPTL3	-0.9281	3770	0.769	-0.9139	3820	0.779	0.8026	1714	0.314	-1.14	4297	0.8617	0.5192	2487	0.5029	-1.19	4411	0.8757	-1.11	4000	0.81	-0.7364	3272	0.6567	0.5384	1635	0.3504	0.320184	0.535571	1.08121	1.50518	1.20456	-0.037865	0.281777	-0.022948
ANGPTL4	1.01	1556	0.27	1.55	113	0.012	-1.3	4488	0.91	1.11	1047	0.2027	1.12	952	0.1835	-1.33	4663	0.9241	1.02	1053	0.206	1.23	678	0.1204	1.06	625	0.1324	-0.462133	-0.655972	0.107778	-0.142645	-0.818649	-0.0837	-0.645384	-0.139298
ANGPTL6	-0.93	3778	0.779	-0.9542	3918	0.81	0.7179	1940	0.365	0.8654	1881	0.372	-0.9094	3545	0.7221	-0.4973	2907	0.589	1.18	702	0.131	1.06	1238	0.2322	1.07	611	0.1195	0.858139	0.940788	0.063708	1.1609	0.393181	1.08821	-0.179209	0.378942
ANK2	0.5928	2727	0.533	0.8474	2139	0.404	0.6744	2037	0.385	-1.59	4952	0.9829	1.11	982	0.1851	0.4298	2858	0.5786	-1.23	4375	0.877	0.7994	2079	0.4053	-0.9069	2912	0.5832	1.22723	0.123558	0.501925	0.915544	1.24968	0.781797	0.942519	0.929853
ANKFY1	0.9907	1638	0.286	0.755	2445	0.468	0.578	2234	0.427	-1.27	4549	0.9037	-1.62	4995	0.9948	1.21	715	0.1343	-1.19	4271	0.864	-0.8578	3593	0.7199	-0.9389	3042	0.6238	0.526048	-0.524122	0.474449	0.230095	1.13437	-0.035863	1.15046	0.430462
ANKHD1	1.25	762	0.113	1.08	1317	0.231	-0.6105	2575	0.5	1.14	934	0.1807	1.19	758	0.1488	-0.8285	3602	0.7278	0.9382	1221	0.237	0.889	1819	0.3466	0.804	1160	0.2293	-0.33651	-0.707336	-0.064622	-0.163814	-1.46431	-1.1417	-0.364853	-0.443141
ANKRD1	1.21	893	0.138	-0.8219	3600	0.727	1.58	119	0.015	0.6316	2586	0.5197	0.7075	2130	0.4224	-0.578	2986	0.6084	1.03	1042	0.196	-0.9754	3892	0.7844	-1.52	4973	0.9858	-1.00068	-1.09971	-1.04479	-0.279596	-1.59572	-0.525349	-0.834806	-0.612215
ANKRD6	0.8236	2155	0.397	-0.8284	3616	0.731	1.36	414	0.063	0.7509	2262	0.4503	1.11	984	0.1851	0.5473	2760	0.5589	0.9835	1126	0.216	-0.8722	3641	0.7311	-1.12	3852	0.7763	-0.078872	-0.338073	-0.288228	1.16292	-0.631646	0.188397	0.446836	0.784032
ANP32A	1.24	788	0.124	0.6585	2718	0.542	0.8727	1527	0.275	-1.24	4468	0.9025	0.9355	1445	0.2749	0.6714	2491	0.5072	-0.8252	3041	0.606	-0.8119	3456	0.7	-0.7563	2310	0.4403	-0.191037	-0.658703	-0.742428	0.219863	-0.00534	-0.534416	-0.123274	-0.205628
ANP32B	0.9742	1691	0.297	0.7418	2486	0.477	1.06	1035	0.182	-0.9749	3924	0.7938	1.31	446	0.0835	-1.81	5040	0.9991	0.7809	1627	0.324	-0.5781	2938	0.5865	-0.6869	2069	0.4095	-0.892709	-0.530152	0.412191	0.469943	-0.715208	0.602776	-0.499874	-1.42542
ANP32E	1.07	1348	0.229	-0.8043	3548	0.718	1.13	874	0.152	1.05	1265	0.2382	0.7477	2017	0.3918	1.51	86	0.0244	-1.24	4418	0.883	0.9912	1491	0.2725	-1.4	4804	0.9489	0.23147	1.0738	0.532494	-0.004187	1.23544	2.36288	1.74182	0.920966
ANPEP	1.16	1056	0.175	1.01	1570	0.284	1.05	1052	0.183	-0.8335	3550	0.7138	0.7455	2025	0.3928	-1.16	4359	0.8772	-0.7609	2844	0.561	-1.23	4433	0.8971	-0.659	1984	0.3746	-0.263216	0.345031	-0.101023	0.357246	0.504217	-0.38552	0.436825	0.217658
ANXA1	0.9565	1739	0.304	0.6234	2811	0.558	-0.6677	2705	0.53	1.01	1405	0.2751	0.9325	1453	0.2886	0.6051	2656	0.5405	0.8451	1446	0.289	1.42	244	0.0434	0.9068	920	0.1813	1.5968	1.44014	1.14992	0.909237	0.888335	1.78267	0.717113	1.2434
ANXA2	1.42	326	0.045	1.06	1382	0.247	1.15	846	0.146	-0.9765	3926	0.7951	1.2	721	0.1422	-1.11	4280	0.8545	1.17	725	0.135	1.3	503	0.0921	1.03	671	0.134	1.43531	0.445219	0.013587	0.742995	0.183307	1.23886	1.05107	0.219937
ANXA3	0.749	2367	0.449	0.63	2799	0.544	0.8819	1500	0.271	0.8771	1850	0.3643	-1.18	4247	0.8618	-0.6589	3170	0.6397	-1.03	3773	0.75	-1.12	4212	0.8499	-1.16	4015	0.8101	1.01825	1.2654	1.5404	1.65648	1.60934	0.260296	1.48964	2.13258
ANXA4	-1.56	4811	0.98	-1.06	4135	0.852	0.5847	2225	0.427	1.09	1096	0.2121	-0.5686	2704	0.5343	0.7609	2238	0.4481	-1.16	4158	0.832	1.53	103	0.0174	-1.31	4570	0.905	0.247711	0.794703	1.05344	0.324712	0.508016	2.06336	0.710689	0.595642
ANXA5	1.29	643	0.097	0.8457	2144	0.411	1.11	908	0.156	1.27	543	0.1032	1.03	1196	0.2224	-0.9818	3992	0.805	1.27	548	0.094	1.34	389	0.0744	-0.7132	2161	0.4109	0.008037	-0.309734	0.34534	-0.241685	-0.844697	-0.527976	-0.597097	1.04715
ANXA6	1.33	555	0.078	1.23	790	0.126	0.7983	1722	0.316	-0.8865	3690	0.7505	0.943	1418	0.2821	1.06	1272	0.2446	1.29	501	0.089	-0.6409	3048	0.6113	1.04	648	0.1274	-0.26778	-0.480998	-0.423819	-0.486489	-0.994357	-0.952454	-0.089045	-0.702664
ANXA8	1.13	1138	0.189	-0.7582	3443	0.7	0.8271	1627	0.302	0.695	2431	0.481	0.9455	1410	0.2693	-1.02	4077	0.8202	-0.9436	3441	0.688	0.9559	1597	0.2993	-0.5462	1778	0.3228	1.55755	0.672804	1.21862	1.43494	0.887705	1.4353	1.1903	1.60709
AOC2	1.4	374	0.05	0.7356	2501	0.481	1.17	789	0.137	-1.12	4251	0.8565	-0.6729	2908	0.5869	1.36	322	0.0582	-1.02	3721	0.741	1.23	690	0.128	1.05	636	0.125	0.551716	-0.47728	-1.40321	-0.635621	0.149896	-1.05949	-0.89675	0.150159
AOC3	-0.6662	3173	0.634	-1.28	4497	0.926	0.8486	1579	0.29	-1.09	4180	0.8449	-1.12	4111	0.8331	0.9803	1552	0.291	-1.5	4917	0.976	0.9187	1714	0.3234	0.7548	1272	0.2284	1.03849	0.233982	0.647666	0.3813	1.16602	0.064886	-0.173358	0.05078
AOX1	0.822	2158	0.398	-0.6995	3310	0.663	0.639	2124	0.401	-1.23	4460	0.8949	-1.7	5026	0.9978	1.08	1202	0.2315	-1.48	4888	0.975	-1.79	5040	0.9989	-1.15	3958	0.7994	-1.3931	-1.40907	-1.9728	-1.31364	-0.30888	-2.13811	-0.713746	-1.42969
AP2A1	0.9285	1820	0.324	1.1	1240	0.217	-0.5412	2457	0.477	-0.4906	2882	0.5711	-1.26	4458	0.8997	1.17	873	0.1691	-0.9583	3491	0.698	-1.17	4301	0.8761	0.796	1183	0.2126	1.04399	1.07757	-0.331582	-0.162154	0.904991	-0.437765	0.534733	0.669385
AP2B1	-0.5414	2963	0.583	-0.5689	3089	0.613	-0.6956	2762	0.543	1.48	132	0.0239	-0.4938	2607	0.5241	1.44	189	0.0331	-1.01	3694	0.736	1.23	669	0.1239	-1.47	4919	0.9762	0.579849	0.634375	0.432318	-0.416927	0.770956	1.17242	0.808933	0.186841
AP2M1	1.39	393	0.053	1.03	1490	0.268	1.16	813	0.141	-0.8372	3560	0.7027	-1.26	4461	0.9063	-1.34	4669	0.9299	-1.21	4309	0.882	-1.37	4709	0.9448	1.22	411	0.0923	-1.11391	-0.815333	-0.949308	0.411111	-0.168596	-1.6649	-1.3956	-0.119812
AP3B1	-0.9235	3762	0.767	0.6673	2690	0.523	-1.21	4237	0.864	0.6295	2590	0.5207	1.07	1087	0.2064	-0.9057	3804	0.7672	-0.8132	2998	0.608	0.9343	1665	0.3173	-0.8488	2666	0.5317	-0.951854	-1.19941	0.434472	-0.076329	-0.205728	0.82923	-0.424989	-1.36976
AP3M1	1.48	218	0.026	1.19	936	0.152	0.6546	2082	0.395	-1.06	4122	0.8315	1.38	310	0.0564	-1.38	4735	0.9415	0.7429	1720	0.345	1.21	759	0.1387	-0.7375	2240	0.444	0.036394	-0.542094	1.35632	0.510214	0.274025	0.753368	1.21864	0.27162
APAF1	-1.33	4478	0.931	0.8534	2119	0.407	-1.11	3949	0.804	1.2	751	0.1437	1.25	597	0.1142	-1.32	4651	0.9233	1.82	6	0.001	-0.5928	2966	0.591	0.5557	1618	0.3184	-1.22197	0.855882	1.08462	0.902499	-1.47138	1.31189	1.07407	-0.436376
APBA1	0.7744	2297	0.44	-0.7747	3479	0.709	0.726	1914	0.36	-0.6113	3031	0.6026	0.6776	2207	0.4338	0.8124	2053	0.4135	-0.8768	3215	0.639	1.29	526	0.0987	-0.8285	2576	0.5002	1.2562	1.20465	0.65541	-0.073449	0.20036	0.594529	0.418328	0.687018
APBA2	1.16	1038	0.172	0.9475	1769	0.331	1.16	806	0.137	-0.7815	3406	0.6856	1.08	1066	0.1924	-0.9598	3933	0.7936	1.35	388	0.068	1.15	946	0.1728	1.34	279	0.0442	0.841554	-0.29292	-0.543196	0.979455	-0.589586	-0.308005	-0.208319	-0.456514
APBA3	0.6191	2686	0.522	-1.01	4045	0.826	0.6163	2165	0.412	0.8541	1923	0.3804	-0.6987	2978	0.6001	1.05	1330	0.2548	-1.51	4927	0.981	0.7007	2363	0.4632	-0.939	3043	0.6124	-1.32691	-0.104549	-0.142297	-0.391011	0.375315	0.386879	0.10107	-0.009021
APBB1	0.5787	2754	0.55	0.751	2462	0.487	0.7922	1740	0.322	-0.8251	3523	0.7095	-0.8181	3301	0.6596	1.24	635	0.1243	-0.954	3476	0.695	0.5597	2672	0.5346	-1.08	3708	0.7346	0.045633	-0.522023	-0.97687	-0.643514	-0.529051	-1.01545	-0.368942	-0.198628
APBB2	-1.1	4125	0.851	-0.8737	3725	0.758	-1.36	4639	0.936	-1.43	4784	0.9538	1.25	601	0.1144	-1.36	4699	0.9332	1.45	247	0.04	-0.6852	3135	0.633	1.56	119	0.0209	1.31266	0.734722	0.305764	1.63839	-1.04827	-0.579033	0.238835	1.42038
APBB3	0.7911	2232	0.42	-0.9956	4006	0.818	0.998	1191	0.212	0.8191	2040	0.4045	-0.971	3716	0.754	0.7053	2390	0.49	0.7985	1574	0.315	0.9848	1509	0.2856	1.15	497	0.0903	0.620375	0.53426	-0.151955	-0.217381	-0.615703	0.391231	-0.756512	-0.004456
APC	-0.7172	3284	0.651	0.8762	2044	0.382	-0.6942	2758	0.543	1.26	565	0.1062	0.5279	2477	0.4976	-1.44	4802	0.9559	1.13	817	0.15	0.6125	2567	0.5089	0.9975	723	0.1426	-0.918695	-0.788584	0.427274	0.441717	-0.519334	0.082869	-0.540536	-0.236412
APC2	1.13	1146	0.189	0.7856	2337	0.448	1.22	685	0.115	0.5309	2758	0.5466	1.22	673	0.1274	0.6006	2668	0.5321	0.9893	1114	0.223	0.9806	1521	0.2903	-1.06	3620	0.7379	1.19243	0.481815	0.531969	1.66542	0.453539	1.6647	1.27901	0.497128
APCS	-1.08	4078	0.847	-1.54	4820	0.978	-0.8888	3306	0.665	1.19	779	0.1471	1.43	229	0.0462	1.12	1022	0.197	1.7	35	0.007	1.69	16	0.003	-1.33	4625	0.9162	-0.027325	-0.710908	0.062792	-0.739789	-1.0264	0.507572	1.03029	1.2339
APEX1	0.9939	1627	0.278	1.39	340	0.052	-1.4	4720	0.947	1.25	614	0.1166	-0.7658	3166	0.6257	1.19	801	0.1555	-1.11	4009	0.804	-0.4272	2792	0.5628	-1.39	4788	0.9454	-1.60175	-0.799848	-0.583759	-0.910032	-0.841851	0.17575	-0.327643	0.860292
APEX2	0.7806	2269	0.435	0.918	1884	0.354	1.06	1024	0.18	-1.1	4208	0.8504	-0.8233	3318	0.6631	-0.6026	3036	0.6133	-1.06	3867	0.771	0.6987	2365	0.4727	-0.9908	3254	0.6474	0.474041	-0.175296	0.167794	-1.28531	-0.412651	-0.326968	-1.091	-0.546479
APH1A	1.27	698	0.101	1.73	15	0.001	-1.34	4597	0.929	0.9186	1712	0.3368	-0.521	2642	0.5294	0.9087	1772	0.3531	1.19	684	0.126	1.24	642	0.1187	-1.11	3816	0.7669	-0.595641	-1.04616	-0.654579	-0.255496	-0.492075	-0.485881	-0.497331	-0.951123
APH1B	0.6528	2611	0.505	-0.7119	3337	0.669	0.728	1909	0.357	-1.51	4880	0.97	-0.5652	2698	0.5405	-0.9581	3927	0.7915	-1.18	4220	0.849	-0.7651	3338	0.6739	0.8235	1103	0.2198	0.796854	0.179075	-0.186383	0.678855	0.54482	-0.710596	-0.247748	-0.201722
API5	-0.7968	3456	0.694	-0.8407	3648	0.737	0.5681	2249	0.43	-1.26	4507	0.9037	-1.33	4614	0.9254	-0.8908	3774	0.7586	-1.23	4391	0.881	-0.7874	3399	0.6842	0.8108	1146	0.2257	0.644624	-0.396758	-0.327014	-0.036925	0.148825	-2.19534	-0.074815	-0.423154
APLN	-1.08	4071	0.84	-1.37	4614	0.943	0.9744	1262	0.221	-1.16	4318	0.8687	1.69	26	0.0019	-1.61	4977	0.9852	0.8164	1535	0.307	0.8278	1982	0.3877	-0.5531	1791	0.3529	1.36882	1.21934	1.46437	1.5923	1.03686	1.51132	1.36038	1.36116
APLP1	1.12	1183	0.196	0.9642	1711	0.321	0.7787	1773	0.328	-0.6815	3172	0.6386	-0.8567	3401	0.6926	1.45	158	0.028	-0.8343	3069	0.62	-0.7318	3258	0.6563	-0.8177	2536	0.5049	1.88162	1.73812	1.08641	1.59309	1.49701	1.48076	1.12763	1.49741
APLP2	-1.47	4686	0.964	-0.9775	3967	0.819	-0.9919	3600	0.735	1.33	390	0.078	1.26	587	0.1124	-1.05	4160	0.8341	1.22	628	0.111	0.6027	2591	0.5194	-0.9034	2902	0.5669	-1.40083	-0.443706	0.425696	1.19732	-0.377885	1.73374	0.24652	0.110524
APOA1	0.9778	1683	0.289	-1.67	4949	0.991	1.54	157	0.023	0.6864	2446	0.4918	-0.76	3152	0.6317	1.12	1040	0.2019	-0.8716	3191	0.643	1.16	910	0.1672	-1.01	3338	0.6789	0.720089	0.373422	0.149808	0.235521	0.344314	0.814293	1.0069	1.08513
APOA2	0.6153	2692	0.536	-1.27	4485	0.924	1.17	790	0.133	-0.8383	3564	0.7242	-1.16	4206	0.8506	-1.03	4099	0.8213	0.8271	1502	0.3	-0.4651	2810	0.562	0.5609	1614	0.3175	1.40828	1.26716	1.10241	1.52728	1.08537	1.18991	1.19328	1.47941
APOA4	1.35	480	0.067	0.861	2101	0.395	-0.6021	2552	0.497	-0.984	3947	0.7982	0.9776	1322	0.2611	-1.12	4295	0.8576	0.4666	2213	0.447	0.4703	2760	0.5508	-1.09	3720	0.7469	-0.452957	-0.485317	0.10215	0.186383	-0.281267	-0.26326	0.620508	0.354964
APOA5	1.17	995	0.16	1.28	628	0.099	-0.9018	3345	0.672	1.06	1227	0.2424	1.42	245	0.0464	-1.11	4276	0.8538	0.9415	1213	0.236	1.24	664	0.1225	-1.18	4118	0.8276	-0.798268	-0.940041	-0.426927	-0.529499	-1.17073	-0.232847	0.280836	0.209038
APOB	0.4812	2869	0.562	1.28	609	0.097	-1.48	4847	0.972	-1.25	4490	0.9003	0.883	1617	0.3155	-1.13	4307	0.8601	-0.7852	2910	0.589	-0.615	2997	0.6003	-1.26	4397	0.881	-0.6129	-1.62318	-0.866145	-1.02465	-0.634003	-0.908396	-0.830662	-1.1172
APOBEC1	-1.04	4010	0.825	0.7734	2387	0.456	-0.9124	3381	0.678	1.25	597	0.1134	-1.77	5041	0.9989	1.02	1397	0.2694	-0.9348	3417	0.688	-1.11	4193	0.8472	-1.23	4304	0.8644	-2.46179	-1.73203	-1.54048	-1.31164	-1.01028	-0.934336	-0.99407	-1.95916
APOBEC2	-1.63	4883	0.99	0.8502	2132	0.402	-1.42	4753	0.957	-0.8635	3625	0.738	-1.03	3896	0.785	1.41	234	0.0408	-1.13	4102	0.824	-0.8579	3594	0.7228	-0.7885	2424	0.4818	0.583969	0.409734	0.657202	-0.328431	0.5502	0.595661	1.08175	1.30235
APOBEC3A	-0.8539	3585	0.734	1.21	848	0.143	-1.14	4061	0.826	-1.05	4090	0.8301	-1.16	4221	0.853	0.7837	2159	0.4336	-1.54	4959	0.985	-1.24	4456	0.9008	-0.8897	2839	0.5547	1.68474	0.78321	1.13175	1.4254	1.44065	1.17245	1.28889	1.47986
APOBEC3B	1.33	539	0.078	1.16	1018	0.179	0.9668	1283	0.226	1.55	68	0.0109	1.13	921	0.174	0.9057	1785	0.3551	0.574	2091	0.423	1.19	827	0.1503	-1.12	3866	0.7793	1.01538	-0.070517	-0.792852	0.501144	-0.081612	0.506744	-0.030699	0.442059
APOBEC3C	1.53	150	0.019	1.19	945	0.163	1.33	471	0.075	0.7725	2186	0.4285	-1.66	5015	0.9939	-0.6972	3246	0.6541	-1.14	4125	0.824	-1.28	4534	0.9135	0.9731	778	0.1399	0.029664	1.22067	1.1191	0.971544	1.159	0.925196	1.00822	0.717738
APOBEC3F	-1.44	4647	0.958	0.6072	2849	0.555	-1.01	3648	0.737	1.1	1079	0.2117	0.7778	1938	0.381	0.6902	2435	0.4992	-0.9463	3448	0.696	0.9052	1755	0.3362	-1	3312	0.6722	0.650394	0.108474	0.39025	0.437846	0.765413	1.46072	0.282307	0.51082
APOBEC3G	0.7984	2211	0.416	0.9927	1625	0.299	-1.01	3656	0.739	-0.7759	3391	0.6895	-1.1	4054	0.8198	-0.9374	3875	0.7816	-1.19	4274	0.858	-1.65	4997	0.9903	-1.47	4918	0.9759	0.379754	0.336461	0.105347	1.35779	1.12556	0.348114	0.88983	1.33186
APOBEC4	1.33	553	0.078	1.38	376	0.057	-0.4529	2376	0.457	-1.45	4812	0.9588	0.8252	1807	0.352	-1.33	4657	0.9244	-0.9513	3464	0.699	-1.37	4699	0.9375	0.8119	1145	0.225	-0.136634	0.09811	0.574717	1.11323	-0.201153	0.102079	0.699499	-0.795897
APOC1	0.7663	2311	0.436	-0.916	3830	0.78	1.08	976	0.171	1.4	249	0.0436	1.38	316	0.0586	-0.8705	3714	0.75	1.49	202	0.032	1.12	1049	0.196	-1.2	4175	0.8403	-0.429243	-1.5538	-0.66161	-0.046254	-1.38238	0.321944	-0.738293	-0.322001
APOC2	1.24	805	0.128	1.33	476	0.077	0.6723	2042	0.391	-0.9694	3911	0.7904	1.3	479	0.0904	1.44	175	0.0394	-0.7917	2937	0.583	-0.7367	3273	0.6579	-1.23	4299	0.853	0.295077	-0.707539	-1.3502	-0.000758	-0.525188	-0.318844	0.182232	0.04446
APOC3	-0.7037	3241	0.651	-0.9415	3889	0.803	-0.707	2797	0.552	0.9447	1633	0.3185	0.8066	1863	0.3644	0.7865	2141	0.4369	0.7957	1584	0.317	1.24	641	0.1185	-0.9708	3188	0.6412	1.13819	0.629539	0.621918	0.326466	-0.291133	1.16023	0.674445	0.030739
APOD	-0.7015	3235	0.643	-0.8097	3561	0.721	0.7176	1941	0.362	-1.38	4706	0.9407	1.41	268	0.05	-1.25	4517	0.8998	-0.604	2439	0.491	-0.6364	3039	0.61	-1.09	3734	0.7499	0.415355	0.07116	1.21325	1.46359	1.09694	-0.042628	1.1605	1.17814
APOE	0.7806	2268	0.426	1.24	754	0.12	-1.29	4443	0.903	0.7683	2202	0.4381	0.7298	2079	0.4083	1.22	705	0.1373	-1.26	4471	0.893	-0.9553	3836	0.7734	-0.9704	3186	0.6407	-0.653934	-0.389164	-0.776451	-1.59343	-0.808953	-1.37602	-0.496319	-0.273475
APOL2	1.31	594	0.088	0.9488	1767	0.33	0.7242	1921	0.361	-0.8387	3568	0.7246	-0.7489	3128	0.6254	-0.7416	3355	0.6809	-1.14	4122	0.828	-0.9603	3849	0.7763	-0.9567	3122	0.6288	0.935521	0.561069	-0.611236	1.04709	-0.431706	0.976446	-0.953573	0.175152
APP	1.42	308	0.042	0.9624	1717	0.322	1.01	1149	0.207	1.17	866	0.1656	0.9751	1333	0.262	-0.8684	3707	0.7492	1.43	273	0.046	1.34	397	0.0752	0.6954	1418	0.2766	0.027904	-0.346804	0.663614	-0.565692	-0.556032	0.497805	-0.680852	0.5856
APPBP2	1.13	1164	0.195	0.9129	1901	0.358	0.5554	2273	0.436	0.9131	1731	0.3291	-1.21	4322	0.875	1.12	1062	0.2038	-1.13	4068	0.814	-0.7279	3249	0.6533	-1.08	3693	0.7315	-1.06732	-1.54147	-1.13429	-0.986622	-1.07505	-1.15958	-0.670393	-0.414889
APPL1	-1.21	4284	0.893	-0.6573	3223	0.642	-1.26	4380	0.89	0.7772	2169	0.4358	1.36	368	0.0622	0.9318	1703	0.3408	1.35	398	0.073	1.11	1076	0.1996	-0.9059	2909	0.5941	1.44132	1.03374	-0.008387	-0.406952	-0.756715	-0.126402	0.109642	1.2695
APPL2	1.28	674	0.1	1.17	991	0.168	-0.7194	2831	0.556	-0.8666	3636	0.74	1.13	923	0.1744	-0.9587	3928	0.7918	-0.7092	2696	0.543	0.6637	2454	0.4856	-0.9283	3004	0.604	-0.841856	-1.57078	-0.649854	-0.619789	-0.937333	-0.350719	-0.669632	-0.22149
APRT	0.956	1745	0.309	0.7185	2565	0.493	0.7333	1901	0.354	0.9144	1725	0.3452	-0.9049	3535	0.7109	0.8444	1958	0.4016	0.9249	1257	0.256	0.7659	2181	0.4264	0.9063	921	0.1955	1.32749	1.5022	1.22496	1.25072	1.06157	1.66569	1.23336	1.22386
AQP1	0.7365	2398	0.456	0.6435	2762	0.535	0.8213	1652	0.304	-0.7984	3457	0.6805	0.8506	1744	0.3405	-1.1	4262	0.8238	1.1	900	0.188	0.7102	2338	0.447	1.56	125	0.0134	0.278249	0.86459	0.299989	0.373301	-0.232622	0.317696	0.18042	-0.03084
AQP7	1.53	145	0.018	1	1595	0.291	1.37	394	0.061	1.24	626	0.1191	0.8807	1627	0.3078	0.4499	2844	0.5773	1.02	1049	0.186	0.9937	1484	0.2715	0.7592	1260	0.2266	-0.136197	0.429361	-0.420673	0.004928	-0.684831	-0.618329	-0.455355	-0.15657
AQR	0.9601	1728	0.306	1.48	211	0.025	-0.9999	3629	0.734	1.24	623	0.118	0.6658	2230	0.4449	1.29	482	0.0914	-1.08	3933	0.787	1.15	959	0.1735	-1.49	4934	0.9796	-3.59432	-5.20947	-4.12182	-2.74348	-2.74485	-1.7004	-3.11654	-1.37676
AR	-1.39	4565	0.945	-1.34	4568	0.934	-1.05	3786	0.766	1.22	697	0.1344	-0.6989	2980	0.6003	1.01	1455	0.2838	-1.07	3883	0.775	0.9952	1476	0.28	-1.02	3397	0.6884	0.011781	0.213324	-0.211798	0.223633	0.956064	0.859406	0.154029	1.45524
ARAF	0.8884	1949	0.357	-1.26	4465	0.92	1.41	325	0.05	-1.1	4197	0.8487	0.9016	1557	0.2953	0.7111	2370	0.4841	1.29	488	0.086	1.23	693	0.1317	0.8611	1029	0.1822	0.765793	0.763733	0.587679	0.310737	0.09452	1.30167	0.917002	-0.003085
ARD1A	-1.3	4429	0.919	1.23	786	0.125	-1.38	4672	0.941	0.8123	2060	0.4101	-0.9506	3668	0.7433	1.42	209	0.0363	-1.31	4605	0.918	-0.8094	3450	0.6976	-1.22	4253	0.856	-0.845014	-2.7586	-3.18654	-1.96481	-1.42784	-1.31528	-2.21419	-1.28029
AREG	-0.6242	3089	0.616	0.5284	2968	0.591	-0.6633	2697	0.527	0.5527	2722	0.5446	1.31	448	0.0857	1.26	569	0.1125	1.4	315	0.054	1.07	1214	0.2218	-1.58	5020	0.991	0.635933	-0.167354	-1.29197	-0.237631	-1.43487	-0.743438	-0.258956	0.346172
ARF1	0.8911	1940	0.354	1.25	708	0.114	-0.9412	3460	0.697	-0.6871	3182	0.6391	1.64	41	0.0022	-0.8478	3654	0.7319	1.22	624	0.119	1.06	1260	0.2351	-1.26	4426	0.8961	0.821266	-0.164153	0.810471	1.21727	-0.269798	0.083589	0.810682	1.50475
ARF3	1.26	723	0.113	-0.6707	3247	0.656	1.26	613	0.098	-0.8318	3545	0.7191	1.35	373	0.0677	-0.6623	3179	0.6415	1.25	577	0.103	1.2	774	0.1407	-1.21	4239	0.8526	1.2534	-0.198508	0.034338	0.682048	-0.187955	1.16471	0.402811	0.824515
ARF4	0.7415	2385	0.467	0.9562	1745	0.323	0.6451	2106	0.404	1.11	1021	0.197	0.8277	1798	0.3402	-1.29	4587	0.9178	0.665	1890	0.371	0.878	1845	0.3533	1.02	682	0.1272	0.934391	0.450422	0.120325	0.45861	-0.28395	0.128987	-0.253764	0.43193
ARF5	1.29	651	0.1	0.7246	2542	0.503	1.22	697	0.111	1.48	130	0.0299	-0.7127	3013	0.5964	1.45	164	0.0382	-1.24	4404	0.88	0.8478	1928	0.3735	-1.34	4654	0.9202	-0.433154	-0.322728	-0.378282	-0.430429	-0.080059	0.629119	-0.149381	-0.376375
ARF6	1.44	275	0.038	1.31	542	0.088	1.39	358	0.056	-0.9273	3802	0.7688	0.7839	1918	0.3685	-0.9266	3854	0.7761	1.01	1080	0.191	-0.8871	3677	0.7388	1.3	324	0.0515	1.62211	1.51432	1.47184	0.888551	1.17395	1.26734	1.40694	1.32465
ARFGAP1	-0.8872	3666	0.754	-0.675	3257	0.658	0.8445	1588	0.292	0.7246	2352	0.4612	-1.21	4332	0.8766	1.37	308	0.0612	-1.38	4758	0.943	-1.23	4419	0.8949	-1.18	4125	0.8199	0.92012	1.68476	1.29286	1.7915	1.95798	1.66428	1.80452	1.49491
ARFGAP3	1.07	1350	0.228	0.9568	1744	0.323	-1.05	3792	0.774	0.6228	2601	0.518	0.8787	1637	0.3088	1.13	1000	0.1919	-0.8693	3180	0.635	0.7348	2273	0.4512	-0.8164	2531	0.4892	1.11275	0.633666	-0.82545	0.169873	-0.11464	0.596141	-0.267968	0.686757
ARFGEF2	1.62	65	0.006	1.35	437	0.067	-1.15	4080	0.827	-1.3	4599	0.9145	-1.34	4632	0.9287	-1.09	4248	0.8487	-0.9517	3468	0.7	-0.6251	3016	0.6051	1.4	230	0.0404	0.299308	0.251405	0.602311	-0.585358	-0.012113	-0.763583	-0.133116	0.925012
ARFIP2	1.05	1433	0.247	0.5321	2965	0.577	0.7185	1935	0.362	0.5702	2701	0.5448	-0.932	3617	0.733	-1.23	4486	0.8941	-1.22	4344	0.873	-1.02	4006	0.8056	1.35	276	0.0496	-0.283031	-0.467165	-0.900583	0.344547	-0.641396	-1.34033	-2.17567	-0.420537
ARG1	1.36	465	0.066	1.31	523	0.086	-0.8385	3159	0.632	0.7117	2388	0.47	-0.6972	2973	0.5881	1.01	1456	0.2736	-1.04	3777	0.751	0.7224	2300	0.4584	-1.31	4573	0.9056	-1.7089	-2.43761	-1.9225	-1.79259	-1.4571	-1.39364	-1.55765	-1.2987
ARG2	0.8683	2016	0.367	0.8743	2054	0.383	-0.9597	3508	0.708	0.9	1780	0.3504	-0.903	3527	0.7185	1.05	1318	0.2521	-1.52	4942	0.983	-1.22	4413	0.8876	-0.9955	3278	0.6658	-0.662717	-0.347776	-0.780931	0.113774	0.984977	-1.03091	-0.408963	0.13975
ARHGAP1	1.58	93	0.012	1.53	141	0.018	-1.48	4853	0.969	-0.5684	2974	0.5863	1.19	734	0.1379	-0.8874	3761	0.7547	1.63	69	0.013	-0.9588	3846	0.7779	1.19	452	0.0749	-1.14995	-1.1778	-0.978097	-0.445575	-1.87647	-1.59881	-0.182632	-1.37614
ARHGAP4	0.7466	2374	0.451	1.19	928	0.149	-1.45	4805	0.966	1.42	207	0.0366	-1.5	4904	0.9751	1.53	71	0.0133	0.65	1930	0.392	-1.23	4421	0.889	-1.05	3553	0.7155	-0.337954	0.773491	-0.763685	0.36416	0.65673	0.57249	0.524553	0.802341
ARHGAP5	-0.9389	3792	0.775	0.7343	2506	0.482	0.9751	1259	0.221	-0.8419	3577	0.7271	-1.21	4320	0.8733	0.7841	2156	0.4378	-0.7109	2705	0.544	-1.49	4861	0.969	0.7477	1291	0.2546	0.444877	-0.100684	-0.745714	-0.601899	-0.497803	-0.392845	-0.402361	-1.24329
ARHGAP6	0.917	1859	0.336	0.821	2231	0.422	0.4545	2345	0.451	-0.8856	3686	0.7504	0.528	2476	0.4976	-1.44	4808	0.957	-1.46	4853	0.97	0.6513	2477	0.4902	-0.8655	2740	0.5463	0.110025	0.605681	1.11058	1.00196	1.17981	0.964053	0.916786	1.21598
ARHGDIA	-1.38	4546	0.943	-1.02	4050	0.827	-1.13	4010	0.816	-0.7842	3413	0.6936	0.703	2141	0.4247	0.5179	2789	0.5662	-0.8867	3253	0.654	-0.9339	3789	0.7629	-0.6652	2001	0.399	0.978661	0.435855	-0.401552	1.11525	1.0742	0.590847	-0.246116	1.17854
ARHGDIB	1.07	1346	0.226	0.6586	2717	0.526	1.32	482	0.077	-1.47	4836	0.9637	1.16	841	0.162	-1.31	4623	0.9165	-1.53	4948	0.99	0.8436	1943	0.3796	1.33	295	0.0589	1.34095	0.488291	1.14634	1.05814	0.666363	0.372904	0.43208	0.1752
ARHGEF1	-0.8949	3681	0.751	0.9196	1876	0.35	-1.15	4063	0.823	-0.4879	2878	0.5754	1.16	850	0.1623	1.17	858	0.1672	0.6643	1892	0.386	1.1	1125	0.2095	-0.7318	2219	0.4408	1.11287	0.650406	0.639533	0.464935	0.404928	-0.525806	0.756234	1.09668
ARHGEF11	0.6413	2637	0.511	0.8132	2257	0.428	-0.8368	3154	0.628	-0.7583	3349	0.6802	-1.26	4449	0.8963	-1.09	4250	0.8493	-0.8302	3061	0.618	-1.11	4201	0.8478	0.7812	1212	0.2399	-0.433417	-0.55645	-0.259601	-0.701649	0.303163	-0.174819	-1.16385	-0.62516
ARHGEF12	1.28	659	0.102	1.36	424	0.066	-0.6754	2720	0.535	0.8457	1947	0.3795	0.6587	2252	0.4424	1.52	81	0.0223	0.8342	1480	0.284	-0.8418	3542	0.716	-1.07	3651	0.723	-0.247615	-0.532251	-1.95576	-0.661614	-0.02921	-1.45765	-0.544562	0.87537
ARHGEF2	1.18	967	0.161	0.8528	2121	0.407	0.8765	1515	0.273	-1.42	4773	0.9519	-1.05	3957	0.799	-1.47	4839	0.9646	-0.9595	3494	0.699	-1.37	4700	0.9403	1	712	0.1315	0.404509	-0.378135	0.648639	1.55941	0.63805	-0.945942	0.305895	0.515386
ARHGEF4	-1.32	4467	0.93	-1.1	4207	0.868	-0.5539	2475	0.48	-1.82	5040	0.9984	-1.02	3863	0.7839	-0.894	3779	0.7584	-1.38	4749	0.942	-1.1	4170	0.8486	0.9062	922	0.1652	0.584814	-0.404776	-0.041461	0.166883	0.877622	0.032114	-0.478175	-0.254951
ARHGEF5	1	1590	0.277	0.7683	2404	0.459	0.8225	1646	0.304	-0.8213	3516	0.7139	0.906	1543	0.3017	1.16	903	0.1756	-0.9006	3302	0.665	-1.38	4729	0.9422	-1.29	4516	0.9017	-0.673698	-1.05496	-0.248062	0.051827	-0.136003	-0.503948	0.773835	0.018609
ARHGEF6	-0.9585	3827	0.784	-1.72	4977	0.995	1.47	232	0.031	0.7992	2114	0.4212	-1.31	4566	0.9219	1.25	623	0.1128	-1.06	3852	0.776	-1.26	4503	0.8975	-1.12	3844	0.7884	-1.24276	-0.690374	-1.19171	0.432458	0.049715	0.359676	-0.012578	-0.251335
ARHGEF7	-1.3	4433	0.925	0.7622	2424	0.478	0.78	1771	0.329	0.8114	2062	0.4038	-1.25	4432	0.8961	-1.2	4438	0.8926	0.6095	2026	0.396	-0.8317	3513	0.7105	-0.6661	2003	0.3796	-0.482059	0.202558	1.08151	0.995871	-0.244777	-0.488788	0.546315	0.546751
ARL4D	1.39	398	0.054	1.25	721	0.116	1.17	784	0.136	-0.5886	2995	0.5972	1.09	1055	0.2076	0.4906	2812	0.5637	-0.9683	3526	0.711	1.44	218	0.0279	-0.964	3161	0.6471	0.648273	-0.119867	0.576801	0.335495	0.247289	0.098096	-0.267095	0.806493
ARMETL1	1.29	637	0.091	1.49	197	0.023	-0.8732	3258	0.652	1.01	1403	0.2747	-0.509	2624	0.5275	0.9657	1601	0.3127	0.7968	1577	0.316	-0.9143	3751	0.7543	0.8711	1003	0.196	-0.954511	-1.05823	-1.39794	-0.352918	-1.47759	-1.97801	-1.13717	-1.05807
ARNT	0.4807	2871	0.573	1.12	1188	0.206	-0.8374	3157	0.631	-1.22	4440	0.8983	-0.9192	3575	0.7225	-0.7961	3506	0.7053	-0.9118	3337	0.666	-1.46	4813	0.9604	-0.7255	2200	0.4188	-0.358999	-0.406172	-0.71773	0.427261	0.013151	-0.551859	0.196633	-1.07641
ARNT2	-0.6407	3120	0.613	-1.14	4281	0.877	1.03	1098	0.197	-1.53	4903	0.9738	-0.6334	2819	0.5682	1.18	848	0.1648	-0.4382	2257	0.453	-1.19	4332	0.8739	1.36	261	0.0469	0.560849	0.570592	-0.018194	0.951645	0.465534	-0.296233	-0.409926	-0.833899
ARNTL	0.5129	2847	0.557	0.9378	1807	0.337	-1.31	4509	0.913	1.06	1228	0.2426	-1.27	4485	0.9023	0.853	1945	0.3896	-1.25	4430	0.887	-0.7321	3260	0.6566	-1.33	4645	0.9275	-0.275277	-0.15344	-0.541071	-0.126832	1.03287	1.10668	-0.637563	0.530463
ARPC1A	1.04	1471	0.253	1.39	341	0.052	-1.12	3979	0.81	1.26	577	0.1097	-0.7768	3188	0.6339	0.6597	2525	0.515	1.8	10	0.003	0.602	2594	0.5195	-0.4079	1670	0.3004	-0.421666	0.035393	0.897702	-0.089447	-0.779067	0.030823	0.090322	1.04656
ARPC1B	0.6219	2675	0.533	0.9598	1734	0.32	-0.7733	2973	0.592	0.7044	2406	0.4743	1.31	464	0.0888	-1.05	4157	0.834	1.43	280	0.047	1.36	358	0.0678	-0.7769	2389	0.4579	0.953246	0.120024	0.649974	0.633358	-0.284839	0.929432	-0.215732	0.184876
ARPC2	1.03	1484	0.255	1.12	1182	0.205	-0.7923	3017	0.604	1.41	244	0.0428	1.21	684	0.1344	1.4	265	0.0458	1.56	117	0.018	1.43	228	0.0401	0.7474	1293	0.2547	-2.14793	-2.5934	-1.69415	-1.59901	-3.06485	-1.18106	-2.18909	-2.28851
ARPC3	-0.9585	3826	0.795	0.7244	2545	0.503	-1.26	4369	0.889	-1.19	4390	0.8847	1.48	167	0.0327	-0.6386	3119	0.6295	0.6092	2028	0.396	1.6	55	0.0102	0.6678	1461	0.2647	1.37448	0.652321	0.031056	-0.008747	-0.319392	1.03312	-0.664823	0.013893
ARPC4	-0.6498	3138	0.618	0.6676	2689	0.523	-1.13	4018	0.816	1.34	373	0.0658	1.22	663	0.1289	1.29	500	0.0958	0.8162	1536	0.307	1.52	119	0.0181	-0.8166	2534	0.5044	0.308871	-0.231626	-0.378118	-0.922986	-0.895393	-0.004099	-0.562586	0.103242
ARPC5	0.6886	2544	0.5	0.7849	2342	0.462	-1.11	3965	0.806	-0.9341	3818	0.7725	0.6596	2247	0.4422	1.12	1020	0.1965	0.6733	1876	0.368	0.6112	2569	0.5153	-0.5873	1849	0.3376	0.821549	-0.678352	-0.860379	-0.263761	-0.44113	-0.786784	-0.365981	-0.331174
ARPC5L	-0.7315	3305	0.664	-1.57	4855	0.981	0.9659	1287	0.227	0.8687	1873	0.3692	-1.35	4645	0.9313	1.08	1198	0.2306	-1.08	3925	0.783	0.9748	1535	0.2918	1.05	628	0.1235	-0.345518	0.687794	0.493813	-0.380643	0.423077	0.522144	0.342807	0.218348
ARRB1	-1.29	4423	0.917	-1.48	4744	0.965	0.6419	2118	0.4	-1.47	4844	0.9726	1.05	1149	0.2308	-1.06	4182	0.8066	0.6128	2018	0.414	-1.15	4259	0.8376	-0.6542	1970	0.4178	-0.411035	-0.901478	-0.529836	0.421992	-0.488416	-0.642478	0.384696	-0.172037
ARRB2	0.8368	2110	0.402	-0.7809	3495	0.704	1.44	288	0.037	0.8225	2030	0.406	-1.14	4170	0.8393	-0.7763	3451	0.6924	-1.33	4662	0.935	-1.01	3978	0.7921	-0.7576	2315	0.4768	-1.53104	-1.29602	-0.958261	-0.37609	-0.058928	-1.13432	-0.760679	-0.18955
ARSA	1	1601	0.273	-0.8968	3781	0.779	1.12	883	0.152	-0.6152	3036	0.6034	0.8592	1709	0.3196	0.6759	2478	0.5047	-1.44	4823	0.96	1.31	482	0.0911	-1.22	4280	0.8486	1.40726	0.647957	1.27842	1.0079	1.77498	1.35152	0.820528	1.85147
ARSB	1.31	589	0.082	-0.5899	3114	0.618	1.45	271	0.036	1.22	680	0.1244	-1.43	4817	0.9632	0.623	2615	0.5245	-0.6707	2590	0.532	-0.6172	3001	0.5985	0.9023	930	0.1973	0.652001	1.39836	0.839529	0.221451	0.215514	0.445327	0.201048	1.02298
ARSD	0.9968	1618	0.281	-0.8828	3751	0.762	1.26	601	0.099	1.53	80	0.0136	-0.7638	3159	0.6338	1.47	129	0.0232	0.5883	2062	0.417	0.7137	2325	0.4551	-0.951	3103	0.6235	-0.146555	0.836957	0.198989	-0.172554	0.060889	1.02263	0.471315	0.395478
ARSE	0.7883	2241	0.431	0.6793	2658	0.532	-0.6346	2619	0.511	-0.8817	3674	0.7424	-1.03	3883	0.7875	-0.8143	3559	0.7143	-1.43	4820	0.96	-0.8429	3544	0.7165	-0.9684	3178	0.6281	1.49402	1.16594	1.26577	1.48651	1.48391	1.82062	1.23792	1.28239
ASAH1	1.26	727	0.106	-0.838	3640	0.736	1.42	307	0.043	0.955	1590	0.3113	0.9563	1388	0.2742	-1.03	4122	0.8248	-0.5807	2399	0.483	1.43	232	0.0409	0.5722	1602	0.3161	1.03339	0.50292	0.92685	0.040701	0.297072	0.477863	-0.196903	1.35728
ASAH3L	-1.65	4910	0.993	-1.38	4620	0.944	0.8345	1610	0.298	-0.9264	3795	0.7731	-1.3	4551	0.914	-0.6064	3047	0.6186	-0.9961	3616	0.726	-1.23	4431	0.8917	-0.5863	1846	0.3635	0.228385	1.06438	0.865604	1.21329	1.27738	1.39405	0.458415	0.916294
ASCC3	-0.9918	3899	0.802	-1.6	4884	0.985	1.37	403	0.061	-0.7201	3253	0.6555	-0.9987	3793	0.762	1.26	570	0.1033	-1.1	3980	0.803	-1.31	4590	0.9168	-1.23	4313	0.8779	1.01121	1.01552	0.769798	1.26285	1.53615	1.65633	1.39106	0.391284
ASCC3L1	-1.56	4810	0.98	0.9276	1840	0.344	-1.61	4972	0.992	0.6703	2501	0.4999	-1.68	5020	0.996	1.33	401	0.0729	-1.03	3734	0.744	-0.7785	3376	0.6781	0.6642	1466	0.2886	-2.75924	-3.84793	-4.78854	-3.28227	-3.30885	-3.1708	-3.8717	-2.83763
ASGR2	-0.594	3033	0.596	0.5454	2953	0.575	1.24	658	0.11	0.6963	2426	0.4864	1.29	510	0.0951	-0.991	4012	0.8074	1.12	847	0.154	1.08	1211	0.2256	-1.34	4677	0.9322	-0.589946	-0.111375	-0.02072	-0.066067	-0.707357	0.284972	-0.524478	0.064107
ASH1L	0.8415	2095	0.386	0.5605	2926	0.57	0.865	1546	0.282	1.08	1159	0.226	0.8539	1733	0.3339	1.12	1041	0.2019	0.9361	1229	0.238	-0.5183	2848	0.5707	-1.14	3951	0.7984	-0.317754	0.781033	1.01987	0.488879	0.251121	1.27457	1.27784	0.995459
ASIP	1.05	1416	0.241	0.9833	1658	0.303	0.9594	1299	0.23	0.8964	1797	0.3412	0.619	2328	0.4608	-1.38	4732	0.9437	-0.8765	3213	0.639	-1.12	4216	0.8557	0.6229	1546	0.2786	0.761011	1.22253	1.14376	1.62256	0.932073	1.00529	1.3619	1.47105
ASL	-1.15	4207	0.873	1.06	1383	0.247	-1.33	4571	0.924	0.6979	2420	0.4855	-0.8681	3422	0.699	1.26	547	0.1078	0.6611	1906	0.387	0.7497	2234	0.4356	-0.8537	2689	0.5362	-0.558547	-1.73313	-0.929512	-1.29133	-1.54656	-0.019801	-0.785624	-1.08306
ASMT	1.14	1116	0.185	1.2	886	0.15	-1.27	4410	0.897	-0.6913	3186	0.6375	1.56	78	0.0189	-1.01	4062	0.8177	1.58	99	0.019	1.17	905	0.1659	0.731	1334	0.2393	0.789209	-0.201264	0.67553	-0.046566	-1.02702	0.795728	-0.083324	0.060493
ASNA1	-1.22	4291	0.896	1.05	1406	0.251	-1.48	4843	0.972	0.9792	1495	0.2951	-0.7771	3190	0.6413	0.8707	1906	0.3773	-0.87	3183	0.642	0.5136	2724	0.541	-0.9997	3299	0.6702	-0.733683	-0.901093	-0.688438	-0.040672	-0.282488	-0.093906	-0.712638	-0.22446
ASNS	-0.7347	3310	0.665	-1.31	4540	0.933	0.9171	1408	0.251	0.7881	2143	0.4181	0.6748	2218	0.4347	-1.35	4696	0.9368	1.45	249	0.042	0.5011	2738	0.5502	1.6	95	0.0138	-0.04803	-0.809518	-0.909303	-0.285583	-1.39167	-0.98222	-1.31841	-0.243059
ASPA	0.7661	2314	0.436	1.13	1130	0.196	-0.5352	2442	0.474	-0.5652	2970	0.5915	0.5999	2369	0.476	1.05	1324	0.2535	0.7825	1625	0.323	0.7324	2279	0.4454	-0.9593	3142	0.6306	0.745634	-0.724782	-0.561325	-0.562977	-0.820712	-1.00723	-0.001778	-0.175433
ASPH	-0.7577	3358	0.671	-1	4023	0.822	0.773	1792	0.331	0.9245	1690	0.3323	-0.6859	2945	0.5934	0.7495	2270	0.4619	0.6624	1902	0.386	-0.8567	3590	0.7222	-0.696	2096	0.4151	0.202874	0.150602	-0.691848	0.611915	0.227236	0.185012	-0.247287	0.144942
ASRGL1	0.5747	2763	0.552	-0.7932	3521	0.719	1.24	650	0.104	-1.16	4331	0.8699	1.58	68	0.0101	0.5582	2746	0.5559	-0.8406	3088	0.624	1.25	623	0.1156	-0.4796	1709	0.3345	1.58742	0.725789	1.35143	0.498001	1.38889	1.30855	1.07226	1.49752
ASS1	1.27	697	0.101	1.3	569	0.09	-1.29	4439	0.902	0.9115	1738	0.3421	-0.8083	3277	0.6615	0.6608	2522	0.5152	0.892	1337	0.262	1.08	1193	0.2226	0.6257	1538	0.3015	0.994292	0.487281	0.656255	0.649981	0.847296	0.496208	0.098362	1.0021
ATF1	1.3	608	0.087	1.41	297	0.045	-0.7004	2777	0.545	0.9666	1550	0.3038	-0.6726	2906	0.5867	1.25	585	0.1158	-1.28	4527	0.906	-0.5201	2853	0.5708	-1.56	5008	0.991	-0.744086	-1.04362	-0.398529	-0.195254	0.684028	0.737329	0.385578	0.214724
ATF2	0.9327	1810	0.32	1.29	585	0.099	-1.26	4361	0.887	-0.6863	3180	0.6356	-0.6988	2979	0.5886	0.4766	2824	0.5745	0.6198	2001	0.392	-0.9581	3844	0.7774	-0.8115	2508	0.4851	-0.771132	-0.144972	-0.581628	-0.077344	-0.151026	-0.545822	0.746896	0.705174
ATF3	1.26	719	0.105	0.7688	2403	0.459	0.6111	2173	0.414	-1.39	4721	0.9429	0.8591	1710	0.3304	-0.6615	3176	0.6411	0.6078	2032	0.41	-1.38	4727	0.9419	0.7274	1340	0.2646	0.245926	-0.479055	-0.527884	0.868525	-0.278291	-0.505004	0.666374	-0.450872
ATF4	0.82	2160	0.399	0.817	2242	0.425	0.7668	1809	0.335	-1.11	4234	0.8539	0.919	1491	0.2972	1.09	1152	0.2203	-1.3	4573	0.914	0.6861	2391	0.4716	-1.31	4585	0.9153	0.403188	-0.454264	-0.372609	-0.114191	0.273184	1.07766	0.505685	0.20075
ATF5	1.58	92	0.01	1.25	716	0.115	0.6653	2059	0.389	0.9199	1707	0.3361	1.36	365	0.0661	-1.05	4155	0.8321	0.8657	1396	0.278	-0.54	2874	0.5744	-0.6977	2102	0.4164	0.71306	0.919048	0.455063	0.88359	0.483072	0.676559	0.922559	1.42202
ATF7IP	-1.24	4326	0.902	-1.1	4212	0.864	-1.4	4718	0.951	1.21	726	0.1392	-0.7246	3050	0.6142	-0.8951	3781	0.7613	-1.22	4340	0.872	0.7841	2129	0.4146	-1.12	3870	0.7798	-0.265279	-0.201503	1.30199	0.38396	1.15413	1.74034	0.482029	0.998842
ATG10	0.6466	2625	0.508	1.25	705	0.113	-1.38	4679	0.942	1.31	460	0.0756	-1.49	4889	0.9764	1.4	258	0.037	0.6871	1847	0.387	0.79	2102	0.4106	0.7719	1232	0.267	0.68454	0.604076	-0.714951	-0.054116	-0.35887	0.220068	-0.287813	-0.110026
ATG12	-1.45	4670	0.96	-1.45	4694	0.959	0.8951	1468	0.264	1.47	151	0.0197	-1.08	4025	0.8085	0.9221	1735	0.3481	-0.8765	3212	0.647	-0.7999	3426	0.6882	0.7361	1322	0.2828	-0.554934	-0.185778	-0.08471	-0.208305	0.124997	-0.791366	0.095977	0.019207
ATG16L1	0.9605	1727	0.306	0.9902	1636	0.301	-0.8002	3050	0.606	-1.13	4264	0.8548	-0.8072	3271	0.6611	-0.4687	2883	0.5772	-1.17	4214	0.852	-0.8926	3697	0.7359	-0.9832	3227	0.6658	0.982754	0.962662	0.830427	1.32801	1.23786	1.10615	0.441698	0.752927
ATG16L2	0.912	1878	0.339	1.28	613	0.097	-0.8026	3058	0.607	1.04	1314	0.2554	-0.7892	3221	0.6476	0.4829	2820	0.5723	0.7182	1765	0.358	1.1	1118	0.208	0.7885	1195	0.2366	1.14905	1.54239	1.22674	1.47754	1.09045	1.93638	0.67925	1.09993
ATG2A	-1.08	4080	0.842	0.8242	2214	0.42	-0.673	2716	0.532	0.9904	1464	0.2895	-0.6142	2784	0.5662	1.41	241	0.0348	-0.8081	2980	0.604	0.9135	1733	0.3344	-1.42	4835	0.9673	0.27027	-0.228501	-0.294239	-0.505241	-0.102542	0.382075	-0.692353	1.10169
ATG2B	-0.986	3888	0.799	-0.8222	3603	0.727	-0.9891	3595	0.728	-0.5679	2973	0.5923	-0.6198	2795	0.5623	-1.32	4647	0.9227	-0.7109	2704	0.544	-0.6817	3129	0.6312	0.9486	829	0.1612	-0.196458	-0.537684	0.832204	1.38636	0.259474	0.5568	0.545151	0.742959
ATG3	-1.02	3967	0.818	-0.929	3860	0.786	0.8521	1572	0.288	-1.4	4739	0.9464	-1.28	4492	0.9031	-0.9579	3926	0.7914	-1.54	4960	0.986	-1.73	5025	0.9964	-1.4	4795	0.9523	-0.815366	-0.551224	-0.73303	0.172374	1.35784	-0.574116	0.489325	-0.746866
ATG4A	-1.24	4316	0.905	1.11	1214	0.212	-1.42	4751	0.952	0.858	1906	0.3718	-0.5725	2712	0.5352	1.04	1337	0.2484	0.5556	2124	0.415	-0.6548	3070	0.6153	-1.43	4849	0.9583	-1.64845	-1.22354	-0.240464	-2.09086	0.035841	0.659691	0.424744	-1.20184
ATG4B	0.7803	2271	0.426	0.949	1766	0.33	-0.6114	2579	0.5	1.33	413	0.0725	-0.5334	2658	0.532	0.6848	2455	0.5019	1.07	945	0.175	1.02	1401	0.2658	0.6577	1478	0.2906	0.644241	0.721489	0.615877	-0.090771	-0.499648	0.252083	-0.43133	-0.361132
ATG4C	1.09	1279	0.213	1.32	504	0.081	-1.26	4374	0.889	1.02	1352	0.2533	-1.03	3881	0.7867	0.8336	1990	0.4005	-1.57	4985	0.989	-0.8055	3436	0.6967	-1.38	4750	0.9375	-0.417225	-0.42761	1.06919	0.070533	0.942454	0.880686	1.28521	1.40299
ATG4D	0.8442	2084	0.391	0.8861	2011	0.381	-0.5322	2438	0.473	1.39	261	0.0541	1.15	859	0.1567	-0.7302	3324	0.6699	-0.5562	2362	0.461	-0.8196	3478	0.7047	-1.43	4846	0.958	-0.742472	-0.783667	-0.756435	0.251054	-0.330392	0.930328	-0.1537	-0.0495
ATG5	1.12	1171	0.197	-1.07	4144	0.855	1.62	83	0.012	-1.07	4131	0.8358	1.08	1075	0.1938	0.8015	2092	0.4219	-0.4565	2265	0.44	-0.9041	3722	0.7485	-1.04	3483	0.69	1.10434	1.0685	1.32142	1.42953	1.18258	1.40624	1.59248	1.25364
ATG7	-0.503	2933	0.587	-0.6078	3141	0.633	0.858	1556	0.284	-0.5109	2903	0.5789	0.8323	1784	0.3479	0.933	1695	0.3354	-0.9944	3612	0.725	1.14	985	0.1822	0.8979	938	0.1844	0.993229	0.266769	0.008578	0.459843	0.156855	0.219558	0.511672	0.371871
ATG9A	-1.01	3939	0.811	-1.5	4762	0.968	1.13	875	0.153	1.08	1147	0.2238	-1.14	4166	0.8418	-0.8194	3573	0.7223	-0.7314	2751	0.558	0.8062	2059	0.4001	-0.9989	3292	0.669	-0.95211	-0.961027	0.185986	0.016419	0.199198	-0.077211	0.071142	0.12654
ATG9B	1.54	140	0.015	0.8512	2128	0.401	1.48	217	0.03	0.6164	2616	0.5258	1.21	694	0.1369	0.883	1859	0.3695	-1.11	4028	0.809	0.7506	2229	0.4352	-1.12	3853	0.7763	-0.112249	-0.011865	-1.44006	0.050137	-0.252663	0.469571	-0.438738	-1.60053
ATIC	0.9868	1646	0.289	-0.821	3598	0.727	1.28	560	0.09	1.19	796	0.1513	-0.4892	2601	0.5232	-0.6998	3254	0.6593	-0.8001	2958	0.599	1.13	1020	0.1894	0.711	1377	0.27	-0.615393	-1.27516	-0.95453	-1.25218	-0.719719	-0.739648	-1.56616	0.373112
ATM	0.7225	2440	0.465	1.15	1041	0.178	-0.5384	2446	0.475	0.6667	2512	0.5021	1.56	84	0.0125	0.4248	2859	0.5788	1.38	345	0.06	1.23	692	0.1283	-1.39	4786	0.9512	0.277285	-0.350534	-0.005302	0.002747	-0.889418	-0.331045	0.734662	1.30065
ATN1	-1.77	4974	0.998	-1.31	4536	0.927	-0.9967	3619	0.732	1.01	1382	0.2703	-1.1	4052	0.819	1.59	40	0.0052	-1.35	4690	0.934	-1.03	4029	0.8111	-1.34	4664	0.9303	0.307062	0.340903	-0.402223	-1.04459	0.511559	1.43719	0.944769	0.354998
ATOH1	0.9798	1674	0.288	-0.902	3791	0.781	1.5	199	0.031	1.14	931	0.1788	0.8903	1602	0.3023	0.8263	2011	0.405	0.8867	1348	0.258	1.54	96	0.0161	0.7182	1359	0.2445	1.44674	1.53787	1.46693	1.33571	1.1071	1.95053	1.35025	1.96106
ATP12A	0.911	1881	0.34	-0.7477	3418	0.687	1.27	588	0.096	0.742	2296	0.4563	0.9062	1542	0.3017	0.5399	2765	0.5615	0.5902	2059	0.416	0.5328	2697	0.5371	-1.02	3424	0.6928	-0.286726	-0.320169	0.451356	-0.196039	-0.057697	0.215782	1.01936	0.410343
ATP13A2	0.757	2344	0.455	0.7577	2440	0.481	1.02	1126	0.2	-0.6264	3053	0.6069	0.8514	1740	0.3245	-1.47	4840	0.9647	-1.29	4544	0.902	1.03	1360	0.2498	0.7136	1373	0.2461	1.24305	1.36084	1.54346	1.94392	0.853157	1.32747	0.374522	1.53946
ATP1A1	-1.04	4006	0.825	1.06	1373	0.245	-0.9743	3551	0.719	-1.08	4153	0.8395	1.2	709	0.1408	-0.9519	3913	0.789	-1.33	4650	0.926	-0.87	3629	0.7296	0.7723	1230	0.244	-0.158873	-0.741066	-0.812582	0.751621	-0.161524	-0.381505	-0.857112	0.136201
ATP1A2	1.01	1568	0.273	0.9928	1623	0.299	-0.8978	3333	0.669	-0.5847	2991	0.598	-0.9228	3582	0.729	0.6867	2449	0.5006	-1.06	3860	0.77	0.6808	2400	0.4748	-1.53	4982	0.9874	1.20285	1.39082	1.14931	0.992592	1.3403	0.688234	1.10183	0.859798
ATP1A3	1.11	1244	0.206	-0.6455	3201	0.637	0.6476	2097	0.398	1.11	1033	0.2006	1.09	1038	0.1968	-0.8249	3590	0.7261	-0.8481	3107	0.629	1.39	288	0.0539	-0.5118	1739	0.3405	0.040407	-0.448353	-0.188821	1.14765	0.538762	0.583272	-0.576935	0.693218
ATP1A4	0.7897	2236	0.421	0.6223	2815	0.547	-1.14	4057	0.821	-0.6733	3155	0.6352	-0.6939	2964	0.5975	0.6536	2545	0.5179	-0.6331	2500	0.503	0.5542	2676	0.5325	-0.7597	2319	0.4599	1.47633	-0.748568	-0.20245	1.76335	0.845403	1.04661	0.264778	0.281331
ATP1B1	0.733	2410	0.458	1.47	214	0.026	-1.22	4248	0.866	1.2	767	0.1475	-1.33	4613	0.9254	1.29	490	0.0933	0.7514	1703	0.34	1.05	1284	0.2415	-1.09	3755	0.7534	-1.12865	-1.61284	-1.64075	-1.22436	-1.81794	-0.74461	-2.29924	-1.62311
ATP1B2	-1.42	4608	0.952	-1.16	4310	0.883	0.7271	1911	0.357	1.14	955	0.1825	-0.9944	3778	0.7601	-0.7345	3338	0.6714	-1.21	4323	0.877	-1.13	4233	0.8415	-1.18	4088	0.8356	0.167093	0.101441	-0.095471	1.27917	0.754555	0.949774	0.673958	0.219207
ATP1B3	1.27	718	0.105	1.06	1398	0.249	0.924	1395	0.249	1.08	1145	0.2232	-0.6282	2808	0.5655	1.32	404	0.0737	0.6629	1899	0.386	-0.9401	3803	0.766	-0.766	2348	0.4647	0.301505	-0.335533	-1.15058	0.45774	-0.096059	0.946478	-0.37161	-0.609109
ATP2A1	0.9121	1876	0.339	-0.7091	3330	0.668	1.28	579	0.094	1.14	927	0.18	-1.31	4565	0.9171	0.5452	2762	0.5593	0.9252	1256	0.245	-0.6865	3139	0.6333	-0.9124	2933	0.5884	-0.712504	0.104527	0.099996	0.009765	-0.301346	0.669386	0.189608	1.11801
ATP2A2	-1.43	4638	0.957	0.6185	2822	0.56	-1.34	4590	0.926	0.6251	2599	0.5219	-1.05	3949	0.7927	1.07	1247	0.2399	-1.21	4329	0.87	-1.22	4411	0.8876	-0.7407	2255	0.4465	-1.66448	-3.03511	-3.33274	-1.89257	-2.3377	-1.85278	-2.70408	-1.74788
ATP2A3	-1.1	4114	0.854	-1.6	4887	0.986	1.44	287	0.044	-0.9996	3982	0.8054	-1.4	4754	0.9483	-1.29	4594	0.9131	-1.21	4333	0.87	-1.49	4851	0.9679	-1.31	4582	0.915	0.710099	0.718703	0.644081	1.84931	1.66665	1.11622	1.22862	1.21289
ATP2B1	1.21	880	0.135	1.29	594	0.094	-1.2	4207	0.858	-1.12	4240	0.8556	0.736	2064	0.4044	0.9764	1566	0.3041	-1.1	3990	0.799	-0.8922	3693	0.7425	-1.34	4665	0.9304	0.952274	-0.036712	-0.268594	0.603624	0.909894	0.024557	0.943805	0.303653
ATP2B2	-0.8832	3652	0.744	0.5433	2956	0.575	-0.9041	3352	0.673	-1.39	4728	0.9441	-1.26	4457	0.8986	1.12	1048	0.2023	-1.27	4497	0.899	-1.47	4827	0.9643	-1.4	4799	0.9532	0.158609	-0.462048	-1.74684	0.251082	1.05031	-1.62537	0.920211	0.892133
ATP2B3	-0.8807	3646	0.743	0.803	2285	0.434	1.46	261	0.034	-1.04	4075	0.8235	-0.893	3495	0.7135	1.39	281	0.0478	-0.8827	3244	0.651	-1	3953	0.7966	-1.34	4668	0.9305	-0.066346	0.227318	-0.237299	-0.215332	0.459478	-0.041162	1.52571	0.483072
ATP4A	-0.5782	3009	0.592	-0.8906	3766	0.767	-0.6044	2556	0.498	1.11	1042	0.2021	-1.11	4078	0.826	1.36	321	0.0582	-0.8476	3104	0.629	-1.01	3973	0.7997	-1.11	3828	0.7706	-0.850535	-0.440867	-0.648032	-0.700777	-0.484298	0.153854	-0.056732	-0.341883
ATP4B	1.48	208	0.025	0.8612	2100	0.394	1.23	674	0.113	1.25	608	0.1154	1.27	553	0.1036	-1.48	4844	0.9635	1.56	116	0.018	1.06	1259	0.2353	0.9961	728	0.1431	0.45906	0.669053	0.388463	1.65153	-0.915553	1.30082	-0.252728	0.897659
ATP5A1	0.5589	2792	0.544	0.8553	2116	0.398	-1.24	4329	0.882	1.74	5	0.0001	1.36	369	0.067	1.21	738	0.1446	1.22	636	0.115	1.56	82	0.0118	-1.28	4470	0.8934	-0.148571	-0.839561	-1.1836	-0.182962	-1.47211	0.029541	-0.463029	0.19002
ATP5B	-0.9125	3733	0.761	0.7171	2567	0.494	-1.18	4154	0.849	1.49	122	0.0203	0.4841	2522	0.5078	1.34	383	0.0687	-0.4828	2287	0.458	1.13	1010	0.1873	-1.03	3470	0.7009	-0.070946	-0.543962	-1.32902	0.264675	-0.534628	0.710274	-0.812363	-1.02792
ATP5C1	-0.9538	3819	0.782	0.6669	2691	0.524	-1.25	4331	0.883	1.22	702	0.1355	1.36	356	0.0653	-0.8712	3717	0.7503	0.411	2235	0.45	-0.5317	2868	0.573	-1.16	4019	0.8114	-1.72665	-1.51583	-1.47419	-0.765546	-1.21734	0.046176	-0.551294	-1.27276
ATP5D	-0.6088	3060	0.602	-0.7265	3367	0.675	0.8995	1455	0.262	-1.66	4993	0.9902	-1.34	4631	0.9282	-0.8848	3754	0.7559	-1.66	5028	0.997	-1.51	4885	0.9733	1.11	540	0.1032	1.60679	1.40955	1.56168	1.3894	1.85905	0.071913	0.755544	1.26895
ATP5F1	1.18	974	0.155	1.08	1326	0.235	0.5641	2257	0.431	-0.6713	3149	0.6345	-0.9846	3752	0.7591	-1.55	4919	0.9778	0.5543	2127	0.429	-1.53	4912	0.977	-0.7689	2356	0.4666	0.060101	0.776857	1.16647	0.829727	0.096078	0.571148	0.964863	0.348413
ATP5G1	0.935	1799	0.324	1.36	409	0.061	-1.69	5008	0.997	0.6379	2575	0.5169	0.9741	1335	0.2626	1.25	595	0.1165	1.56	120	0.019	1.06	1258	0.2351	0.6036	1573	0.3085	1.22401	-0.096853	-1.54782	-0.531447	-0.975776	0.35053	-0.941913	0.012909
ATP5G2	0.581	2750	0.538	0.6285	2804	0.545	0.7442	1869	0.349	0.9744	1518	0.2986	0.9214	1487	0.2952	1.38	300	0.0522	0.8945	1325	0.26	1.35	376	0.0704	-1.13	3909	0.7877	1.16173	0.071567	0.330919	-0.455051	-0.004644	0.835141	0.735028	0.586168
ATP5G3	-1.38	4544	0.942	-0.7034	3322	0.665	-1.37	4652	0.938	0.8624	1891	0.374	1.08	1069	0.2031	-1.66	5003	0.9911	-0.8093	2985	0.605	1.32	458	0.085	-0.5492	1784	0.3512	-0.593107	-0.838158	-0.195215	0.403319	-0.254094	-0.239148	-0.598269	0.231688
ATP5H	1.01	1569	0.273	1.36	403	0.061	-1.21	4243	0.866	1.03	1329	0.2595	1.16	843	0.1621	1.44	184	0.0256	1.13	815	0.159	1.16	942	0.1719	-1.52	4974	0.9895	-0.928873	-1.76652	-1.06355	-1.44419	-1.19916	-0.467572	0.084646	-0.251861
ATP5I	0.7952	2219	0.417	0.6065	2851	0.555	0.9597	1298	0.228	0.5737	2694	0.5432	-1.18	4259	0.8637	0.893	1828	0.363	-1.22	4352	0.874	0.7354	2269	0.4442	-0.9479	3084	0.6208	0.589672	0.000923	0.650354	-0.564796	0.961412	0.679342	-0.641528	0.203966
ATP5J	-1.15	4208	0.865	0.9946	1614	0.301	-1.28	4438	0.908	1.15	920	0.1772	0.741	2045	0.4023	1.36	333	0.06	-1.02	3714	0.741	0.9248	1700	0.3238	-1.33	4627	0.9243	0.550399	-0.169928	-0.577789	0.221354	-0.226456	1.01882	-0.133686	0.562088
ATP5J2	-1.56	4812	0.981	0.8957	1972	0.368	-1.17	4138	0.842	0.8589	1904	0.3761	-1.5	4909	0.9761	1.26	555	0.1092	-1.28	4524	0.906	-0.8203	3482	0.7028	-1.22	4270	0.8594	0.043987	-0.393933	-0.218731	0.455539	1.33808	1.06407	-0.338044	1.0803
ATP5L	1.5	181	0.016	1.33	485	0.067	0.718	1939	0.381	1.11	1028	0.1999	0.6639	2237	0.4454	0.9706	1583	0.3092	0.8208	1524	0.305	1.3	492	0.0896	-1.35	4694	0.9358	-2.40899	-3.15416	-2.40043	-3.30721	-2.60272	-0.860353	-2.60464	-1.92481
ATP5O	-0.8382	3556	0.718	1.17	978	0.164	-1.43	4760	0.959	-1.08	4154	0.8399	-1.14	4173	0.8439	-1.57	4941	0.9809	-1.03	3774	0.75	-1.54	4917	0.9776	0.5049	1653	0.325	-0.597361	0.335785	1.25691	1.18203	1.20013	-0.258202	1.41105	0.118941
ATP6AP1	-0.6274	3095	0.608	0.4967	2995	0.586	-1.17	4123	0.838	-1.3	4596	0.9142	0.8543	1732	0.3336	-1.14	4323	0.8632	-1.03	3769	0.749	0.8706	1862	0.3577	1.8	22	0.0031	1.27398	-0.181468	-1.12921	0.442051	0.008366	-0.467358	-0.864346	-0.561139
ATP6V0A1	-1.48	4697	0.965	-1.3	4526	0.926	1.01	1145	0.206	-0.9168	3778	0.7669	-1.39	4739	0.9469	1.6	33	0.0046	-1.52	4937	0.982	-0.9753	3891	0.7842	-1.23	4317	0.8669	0.038185	-0.087679	-0.242152	0.393538	1.49544	1.00221	0.333139	0.04081
ATP6V0A2	1.25	769	0.114	-0.6188	3152	0.627	1.6	100	0.013	1.32	432	0.0763	-1.58	4970	0.9877	0.7399	2291	0.4692	-0.907	3318	0.669	0.6374	2511	0.4959	-1.01	3331	0.6766	-1.03637	-0.048073	0.09757	-1.06693	0.053013	0.180757	-0.159509	-0.353619
ATP6V0A4	1.12	1181	0.196	0.8216	2227	0.422	0.7753	1784	0.33	-0.8776	3664	0.746	0.5939	2379	0.4781	-1.45	4819	0.959	0.7852	1613	0.322	-0.7221	3234	0.6528	1.5	159	0.0287	1.07699	1.0471	0.59495	1.52119	0.753643	1.26719	0.644508	1.19523
ATP6V0B	0.8725	2005	0.365	1.43	265	0.038	-1.34	4592	0.928	-0.869	3646	0.7412	-1.49	4893	0.9724	1.23	675	0.1314	-1.18	4243	0.853	-1.44	4797	0.9572	0.71	1381	0.2705	0.374933	0.40493	-1.05358	-0.232345	0.673057	-0.868463	-0.516129	-0.740636
ATP6V0C	0.5449	2808	0.549	1.67	25	0.003	-1.13	4013	0.816	1.04	1316	0.2557	1.37	332	0.0614	0.9408	1663	0.3303	1.46	232	0.038	1.02	1389	0.2622	-0.7359	2234	0.4434	-0.184802	-1.91372	-2.20774	-2.19508	-2.19184	-1.84673	-1.39658	-0.519323
ATP6V0D1	1.57	104	0.011	1.4	318	0.047	-0.7229	2839	0.557	1.18	819	0.1569	-1.41	4775	0.9519	1.18	825	0.1586	-0.7868	2919	0.59	0.8238	1993	0.3894	-0.5863	1847	0.3635	-1.74142	-1.60333	-2.65658	-1.62885	-1.87812	-2.03077	-1.94079	-2.00175
ATP6V0D2	-0.6999	3232	0.649	-0.8908	3767	0.777	-0.7417	2886	0.573	-0.9964	3975	0.8034	-1.33	4623	0.9269	-1.07	4190	0.8369	-1.07	3881	0.774	-1.3	4587	0.918	-0.6807	2050	0.407	0.900414	1.31056	1.30419	1.5094	1.40289	0.669944	1.35434	0.861899
ATP6V0E1	-1.65	4911	0.993	-1.42	4667	0.954	-0.6593	2677	0.524	1.07	1182	0.2339	1.18	780	0.1495	0.6074	2646	0.53	1.07	961	0.188	0.7655	2183	0.4265	-0.9162	2950	0.6024	0.745591	0.195565	-0.276838	0.462205	-0.220048	0.484551	0.226603	0.102937
ATP6V1A	-0.9918	3898	0.812	0.7066	2593	0.515	-0.8861	3294	0.663	1.25	591	0.1132	0.7199	2104	0.4078	-1.12	4293	0.8604	1.25	579	0.101	0.8023	2069	0.4061	1.35	272	0.0433	0.912608	0.912993	-0.266041	0.26828	-0.245164	-0.255121	0.018568	-0.573299
ATP6V1B1	1.26	725	0.106	0.9473	1771	0.331	0.8728	1525	0.277	-1.16	4337	0.8664	1.03	1188	0.2403	1.01	1431	0.2792	1.2	676	0.13	1.06	1250	0.2326	1.17	465	0.0969	0.752046	-0.219034	-0.597471	-0.633243	-0.516536	-1.26338	0.015116	-0.185289
ATP6V1B2	-0.5639	2990	0.588	1.29	581	0.084	-1.63	4981	0.997	-0.76	3352	0.6575	-0.5515	2683	0.5297	0.9423	1657	0.3191	0.8647	1399	0.29	0.7696	2165	0.4178	-0.853	2687	0.5543	0.266003	-2.07215	-1.45051	-1.69793	-0.784891	-1.3882	-0.881983	0.114318
ATP6V1C1	1.37	432	0.058	1.7	21	0.002	0.8098	1683	0.31	0.9877	1475	0.2884	-0.4672	2584	0.5196	1.31	431	0.0808	1.16	767	0.141	-0.7386	3276	0.6606	-0.4904	1718	0.3367	-1.2892	-1.59565	-1.69519	-1.25233	-1.57075	-1.44024	-1.22392	-1.19945
ATP6V1C2	-1.21	4277	0.891	-1.39	4633	0.947	-1.08	3867	0.782	1.12	1010	0.197	-1.22	4354	0.8806	1.19	807	0.1559	-1.38	4753	0.947	1.04	1300	0.2457	-1.54	4996	0.989	-1.08465	-1.37436	-0.877183	-1.20186	-0.228727	-0.345329	-1.1501	-0.296635
ATP6V1D	1.44	274	0.038	1.47	219	0.029	-0.7552	2925	0.582	0.9168	1718	0.3264	-1.56	4956	0.981	1.18	822	0.1591	-0.8263	3048	0.607	-1.58	4951	0.9831	-0.8724	2763	0.5387	-0.174673	0.244383	-2.1328	-0.472988	0.137686	-1.00859	0.738537	0.851272
ATP6V1E1	-0.6284	3098	0.613	0.8967	1967	0.378	-0.9413	3461	0.701	0.7103	2390	0.4777	-0.4962	2611	0.5269	0.5305	2777	0.5546	0.9432	1209	0.246	0.5895	2624	0.5135	-0.7735	2375	0.4896	0.784921	0.985832	0.969445	1.15821	0.827995	0.993128	1.28296	1.27006
ATP6V1E2	0.9661	1713	0.302	-1.38	4630	0.945	1.61	92	0.013	-1.23	4448	0.8937	1.16	832	0.1602	-1.07	4212	0.8413	0.6796	1859	0.379	0.7519	2225	0.434	0.8563	1035	0.2044	1.2146	0.259462	1.41138	1.34295	1.02917	1.28614	1.36444	1.17559
ATP6V1F	0.6322	2653	0.528	-0.6202	3154	0.636	0.7252	1917	0.36	0.9927	1455	0.2733	-1.27	4472	0.901	-0.9576	3925	0.7924	1.26	555	0.095	-0.9402	3804	0.7682	1.87	8	0.0015	-0.350183	0.153533	0.054226	0.543437	-0.68137	-0.891478	-0.409514	-0.400548
ATP6V1G1	-1	3913	0.806	0.7999	2297	0.437	-1.68	5004	0.996	-0.7542	3336	0.6775	-1.01	3825	0.7722	-1.14	4330	0.8639	-1	3650	0.73	-1.36	4684	0.936	-0.8235	2560	0.5093	-0.474443	-0.503636	-0.66465	0.443777	0.039826	-0.317097	-0.860607	-0.104286
ATP6V1G2	1.04	1457	0.25	0.7225	2548	0.504	0.9571	1305	0.232	0.9786	1498	0.2818	0.8207	1816	0.3446	1.04	1361	0.253	1.47	225	0.037	1.25	637	0.1206	1.22	409	0.067	0.965226	0.401607	0.313115	-0.397199	-1.19087	-0.853296	-0.500314	0.327406
ATP6V1G3	-1.09	4092	0.85	1.14	1120	0.194	-1.25	4347	0.886	1.38	287	0.0594	-1.15	4182	0.8454	1.1	1140	0.2146	0.6784	1865	0.366	0.8577	1899	0.367	-0.9725	3195	0.6321	-0.371198	-0.207405	0.398599	0.36648	0.194467	0.222781	-0.339199	0.591901
ATP6V1H	0.6907	2539	0.484	1.04	1459	0.261	-1.19	4186	0.855	0.8039	2094	0.415	-1.11	4080	0.8264	1.24	647	0.1253	-0.8978	3290	0.663	-1.26	4502	0.9027	-1.07	3645	0.7329	-0.653514	-0.11754	-1.72745	-0.678649	-0.748736	-1.24668	0.270096	-0.519765
ATP8A1	-0.8797	3644	0.749	0.8927	1986	0.376	-0.588	2532	0.491	0.7615	2229	0.4434	-0.6589	2876	0.5801	-0.8437	3649	0.7358	-0.9385	3430	0.691	-0.9687	3869	0.781	-0.7197	2182	0.4313	0.033925	1.13025	0.724126	1.18098	1.27252	-0.057571	1.18464	1.22579
ATR	-0.6546	3152	0.62	-1.14	4283	0.878	1.26	605	0.099	-1.06	4117	0.8311	-0.8883	3484	0.7102	-0.935	3869	0.7803	-1.09	3938	0.788	-1.47	4828	0.9643	-0.9954	3277	0.6658	-0.106434	-0.744679	0.183694	0.089558	0.767002	-1.08081	0.299405	0.238876
ATRX	-0.6321	3101	0.62	1.13	1154	0.2	-1.44	4789	0.958	1.13	965	0.1838	-1.14	4158	0.8413	0.9827	1540	0.29	-1.04	3793	0.754	-0.6559	3072	0.6157	-1.02	3400	0.6751	-1.50574	-1.16254	0.087899	-0.966826	-0.199096	-0.141518	-0.148695	0.401856
ATXN1	0.9037	1907	0.345	0.919	1878	0.351	0.57	2245	0.43	-0.7291	3273	0.6608	-0.9386	3635	0.7283	-0.7218	3304	0.6655	-1.01	3689	0.742	1.43	230	0.0313	-0.5072	1737	0.3664	0.429987	-1.22222	-0.577828	-1.06045	-0.385744	-0.616644	-1.16937	-0.81303
ATXN2	0.7755	2289	0.429	-0.8385	3643	0.736	1.44	280	0.037	-1.54	4917	0.9758	1	1248	0.244	0.7151	2365	0.4845	-0.6634	2570	0.518	0.8544	1910	0.3689	-1.04	3519	0.7088	1.56285	0.062937	1.01538	1.02278	1.41188	0.709371	1.39038	0.798628
AUH	1.13	1165	0.195	1.06	1386	0.248	0.5483	2282	0.437	1.79	2	-0.0001	-0.8657	3417	0.6982	0.7684	2215	0.4478	1.06	964	0.179	-0.7527	3311	0.6686	0.8701	1005	0.197	0.96891	1.62721	0.26	0.452741	-0.128448	1.19219	0.700536	0.0852
AURKA	0.9821	1665	0.292	-0.7497	3424	0.687	1.01	1169	0.208	1.09	1091	0.2146	-1.04	3911	0.788	0.8626	1928	0.3818	-1.35	4696	0.935	-0.97	3876	0.7818	-1.12	3851	0.7761	-1.24689	-1.42174	-0.801271	-1.61452	-0.65453	-1.36549	-1.24544	-0.004767
AURKB	-1.05	4031	0.829	-1.74	4979	0.996	1.11	914	0.158	-1.24	4469	0.8963	0.9579	1383	0.2734	-1.23	4484	0.8939	-1.28	4537	0.907	0.9453	1635	0.311	-1.13	3903	0.7864	-1.07658	-1.25581	-0.213877	-0.079764	-0.069299	-0.077426	-0.380796	0.353563
AVEN	-0.7293	3301	0.657	0.4657	3010	0.591	-1.36	4630	0.935	-1.07	4152	0.8394	0.9118	1524	0.2994	0.639	2581	0.525	1.32	438	0.077	1.07	1217	0.2266	1.06	624	0.1223	1.45668	0.755002	0.944679	1.22254	-0.06777	0.029849	0.861633	1.00128
AVP	-1.5	4720	0.969	-1.77	5000	0.997	1.28	575	0.094	1.08	1154	0.2261	-0.5206	2641	0.5326	0.7937	2123	0.4348	-0.6989	2661	0.545	0.67	2436	0.4798	-0.7606	2323	0.479	1.40779	0.980811	-0.023106	1.08124	0.660893	1.5663	0.510513	1.1206
AVPR1A	-1.5	4724	0.97	-1.18	4354	0.893	-0.7767	2980	0.591	-1.07	4140	0.8319	-1.29	4518	0.9107	-1.36	4698	0.9325	-1.01	3660	0.738	-1.22	4401	0.8765	1.6	99	0.0161	1.43351	1.69692	1.37889	1.54116	1.30255	1.21134	1.25782	1.59052
AVPR1B	-0.6406	3119	0.622	0.4864	3000	0.598	-0.8824	3285	0.66	0.8323	1995	0.3966	0.7891	1905	0.3749	0.8254	2012	0.41	0.7845	1615	0.322	1.14	1005	0.1858	-1.31	4572	0.9131	-0.387914	-1.49191	-1.8274	-0.351331	-0.869505	-0.545884	-1.0711	-0.993756
AVPR2	1.21	903	0.146	0.6475	2755	0.548	1.23	665	0.106	1.31	442	0.0861	0.908	1536	0.2916	0.8161	2042	0.4116	1.17	740	0.131	1.32	436	0.0836	-0.958	3133	0.6186	-0.798119	-0.311395	-0.625954	-0.159717	-0.833654	0.107288	-1.15951	0.404383
AXIN1	1.39	386	0.053	1.07	1349	0.239	1.31	503	0.081	-1.66	4994	0.9886	1.23	640	0.1228	-0.823	3588	0.7185	-0.4635	2273	0.442	-0.7351	3269	0.6571	-0.5549	1796	0.3252	1.16762	-0.023291	0.535047	1.50863	0.687116	1.86104	0.777868	-0.855614
AXIN2	-0.9105	3726	0.76	-1.22	4413	0.904	0.7145	1948	0.364	-1.01	4004	0.8087	-1.04	3909	0.788	1.24	649	0.1256	-1.02	3716	0.741	-0.8404	3538	0.7137	-1	3306	0.6717	1.235	0.890961	0.284776	0.758467	0.891412	0.994361	0.433079	0.059707
AZGP1	1.52	166	0.018	1.34	455	0.068	0.8275	1626	0.301	0.591	2663	0.536	0.6407	2290	0.4568	0.573	2726	0.5523	1.31	464	0.082	0.6382	2508	0.4957	-0.8487	2665	0.5317	-0.743156	0.011763	0.819901	0.429192	0.512188	0.72386	1.2464	0.115053
AZI2	-0.7052	3248	0.645	-0.638	3184	0.633	-0.6789	2727	0.535	0.4915	2800	0.5615	1.37	326	0.0604	0.5342	2773	0.5628	1.13	831	0.152	1.14	993	0.1836	-0.8914	2848	0.5698	0.315911	-0.48575	-0.492802	0.148686	-0.139114	-0.063577	-0.24507	0.405975
AZIN1	0.6285	2661	0.517	0.8964	1969	0.367	-1.02	3697	0.745	0.5511	2727	0.5408	-0.9173	3568	0.7169	-1.03	4109	0.8181	-0.8785	3227	0.649	-1.28	4531	0.9045	-0.703	2117	0.4438	0.175025	0.58392	0.292563	1.27355	0.246216	-0.573534	0.745672	0.400288
B2M	0.8554	2050	0.376	0.8211	2229	0.422	0.6086	2181	0.415	-0.8036	3465	0.6986	1.27	547	0.0991	-0.6315	3100	0.6245	1.35	395	0.073	0.8393	1952	0.3822	0.817	1128	0.2403	0.703879	0.311581	0.891566	1.17239	-0.068449	0.878582	1.33115	0.126864
B3GALNT1	-1.3	4435	0.921	-0.9351	3871	0.789	-0.7096	2805	0.55	0.5929	2660	0.5286	-1.29	4521	0.9121	0.9505	1636	0.3265	-1.47	4880	0.981	-1.11	4175	0.8316	-0.7405	2252	0.4654	0.023071	-0.702927	-0.258216	-1.00186	0.271352	0.527395	-0.446664	-1.07131
B3GALT1	-1.16	4214	0.875	-1.12	4247	0.873	-0.7857	2999	0.6	0.6728	2496	0.4944	0.9146	1510	0.2876	0.7951	2114	0.4263	-1.57	4986	0.989	1.29	535	0.0998	-0.9964	3281	0.6525	0.808274	0.079342	0.425172	0.631163	0.50187	0.4832	-0.290696	1.48725
B3GALT2	0.6352	2647	0.527	0.952	1756	0.328	-0.6204	2596	0.505	-1.02	4034	0.8174	-0.6623	2882	0.5712	1.28	517	0.1027	0.5611	2114	0.413	0.9806	1519	0.279	-0.6998	2107	0.4035	1.69434	1.11436	0.151477	-0.289819	0.589539	0.219951	0.794633	0.819636
B3GALT4	1.43	291	0.039	-0.6565	3222	0.642	1.51	194	0.025	-0.8977	3724	0.7555	-0.8748	3440	0.7027	-0.688	3228	0.6527	-0.9313	3405	0.686	-0.8418	3541	0.7143	0.6711	1457	0.2852	0.689796	0.780865	0.472779	1.05459	0.965432	-0.371442	-0.16673	1.25125
B3GALT5	1.08	1310	0.22	0.6598	2714	0.542	1	1183	0.21	0.9756	1512	0.2984	-1.65	5013	0.9946	-0.9011	3792	0.7643	-0.8654	3166	0.638	0.5111	2729	0.5417	1.56	117	0.0209	-1.862	-1.65876	-2.08068	-1.46663	-1.34672	-1.49229	-2.56566	-1.7268
B3GALT6	-1.13	4182	0.865	1.17	988	0.167	-1.71	5014	0.998	-1.19	4383	0.8609	-0.8382	3355	0.6566	-1.31	4637	0.9191	-0.9808	3568	0.712	0.7659	2182	0.4206	1.48	176	0.0273	0.599086	0.232509	0.628401	0.894224	0.414314	-0.395654	-0.342098	0.577481
B3GAT1	-1.25	4332	0.908	-0.9685	3949	0.816	-0.7329	2869	0.567	0.6265	2595	0.5162	-0.9089	3543	0.718	-1.18	4404	0.8866	-0.4986	2305	0.446	-0.7448	3291	0.6631	-0.4889	1715	0.3095	0.773276	0.774539	1.18435	0.757436	0.882956	-0.273357	0.937998	1.33819
B3GAT2	-1.3	4436	0.921	-1.05	4119	0.844	-0.8369	3155	0.628	0.9997	1435	0.2825	-0.6433	2840	0.577	1.14	945	0.1798	1.11	885	0.171	-0.9794	3899	0.7773	0.9155	901	0.1905	0.818649	-0.124241	-0.842909	-0.052917	-0.559769	-0.137314	-0.404641	-0.163898
B3GAT3	0.5655	2778	0.554	-1.15	4300	0.884	1.27	585	0.093	0.8117	2061	0.4035	0.3645	2560	0.5078	1.31	441	0.0894	-1.14	4112	0.821	1.41	258	0.0497	-1.37	4728	0.9334	0.46709	-0.269643	-0.28664	-0.994502	0.02824	1.61537	-0.311214	0.185228
B3GNT2	0.9442	1771	0.317	1.58	84	0.01	-1.39	4693	0.946	-0.6081	3024	0.6062	-1.49	4890	0.9723	1.14	953	0.1854	-1.38	4742	0.946	-1.49	4854	0.9681	-0.8629	2726	0.5429	-1.22649	-0.831252	-1.45911	-0.466255	-0.297754	-0.555292	-0.872798	-1.36841
B3GNT3	0.7396	2391	0.454	1.31	544	0.086	-1.05	3775	0.763	-1.1	4210	0.85	0.5512	2448	0.4922	1.23	678	0.1323	1.35	389	0.069	0.8069	2056	0.3994	0.7634	1249	0.2474	1.79766	0.831677	-0.340975	-0.279909	0.197964	0.737486	0.368655	0.27185
B3GNT4	0.9255	1834	0.33	0.8072	2270	0.432	-0.7591	2938	0.581	-0.6424	3085	0.6206	0.6083	2354	0.4724	0.7227	2343	0.4796	0.5729	2092	0.424	-0.6471	3061	0.6145	-1.06	3624	0.7274	-0.755956	-0.90872	-0.113788	-0.487209	-0.69215	-0.199812	-0.829581	-0.66001
B3GNT5	0.8427	2091	0.385	0.9158	1894	0.353	1.09	970	0.17	1.24	622	0.1113	-1.08	4020	0.8068	0.7839	2157	0.4432	-1.1	3982	0.804	0.5047	2736	0.5388	-1.36	4716	0.948	0.137167	0.405522	0.763546	0.375184	0.251658	0.039799	-0.049162	1.15529
B3GNT6	-0.7527	3345	0.675	0.5461	2952	0.587	-0.9224	3414	0.685	1.19	781	0.1471	-1.24	4395	0.8895	0.877	1879	0.3695	0.6968	1817	0.357	-0.9871	3917	0.793	-0.9187	2968	0.5802	-0.892372	0.13297	-1.07086	-0.141086	0.079425	1.13954	0.358453	-0.523047
B3GNT7	1.35	481	0.069	1.19	939	0.161	-0.6372	2626	0.512	-0.7339	3284	0.6588	1.28	528	0.1004	-1.7	5018	0.9928	1.2	669	0.119	1.42	242	0.0445	1.44	204	0.0293	0.776176	0.435507	1.28771	0.496839	-0.014565	0.669555	0.419245	0.620103
B4GALNT1	1.43	290	0.039	1.47	218	0.027	-1.25	4350	0.886	-1.06	4106	0.8293	-1.21	4335	0.8765	-0.6258	3087	0.6261	-1.45	4842	0.968	-0.6624	3090	0.6216	1	711	0.1416	-0.149337	-0.315371	0.233473	-0.264341	0.308298	-1.27952	-0.481581	-0.798462
B4GALT1	1.03	1508	0.258	1.15	1064	0.188	-0.9637	3523	0.714	0.962	1568	0.2933	1.14	900	0.1623	1.19	796	0.155	-1.04	3782	0.751	0.824	1991	0.3904	-1.27	4434	0.8802	-1.08944	-2.15309	-1.92096	-1.04315	-1.18826	-1.2118	-1.12812	-0.924254
B4GALT2	1.32	564	0.079	1	1588	0.29	1.17	776	0.134	0.5822	2684	0.5397	-1.1	4064	0.8232	0.7167	2358	0.4837	-1.43	4811	0.962	0.6175	2555	0.5072	-0.7599	2321	0.4599	1.01277	0.825916	-0.527525	0.689604	1.24635	-1.30692	-0.42933	0.036473
B4GALT3	1.15	1086	0.18	0.6596	2715	0.542	0.8777	1513	0.272	-0.8263	3527	0.7101	1.56	82	0.019	-1.12	4296	0.862	0.4856	2203	0.429	-0.8527	3575	0.7215	-1.24	4329	0.8583	-1.58338	-1.18847	0.139366	-0.021314	0.04352	-0.124251	-0.022756	0.799962
B4GALT4	-0.8868	3661	0.746	0.7717	2393	0.457	-1.41	4729	0.953	-0.5604	2965	0.59	-1.43	4813	0.9575	0.6141	2631	0.5366	-1.1	3986	0.798	-1.23	4429	0.8916	-1.03	3468	0.7004	0.333999	0.733505	0.504725	0.700659	1.09368	-0.101218	0.080304	0.312924
B4GALT5	1.1	1254	0.209	0.7286	2526	0.501	1.03	1105	0.196	1.24	632	0.1203	0.6879	2184	0.4273	1.54	65	0.0184	-0.7757	2876	0.571	1.57	69	0.013	-0.4763	1706	0.3068	-0.345597	-1.42837	-0.450582	-1.31342	-0.704608	0.482268	-1.4814	-0.095516
B4GALT6	1.18	968	0.161	-0.738	3390	0.69	0.8076	1692	0.314	-0.8614	3620	0.7372	-1.32	4586	0.9206	1.24	634	0.1227	-0.8829	3245	0.651	0.7126	2329	0.4558	0.7555	1268	0.2511	1.34731	1.73656	0.603816	0.523049	1.27422	1.13468	1.49423	0.460592
B4GALT7	0.5852	2742	0.548	-0.9021	3792	0.782	0.8675	1539	0.279	-1.34	4668	0.9286	-1.04	3921	0.7903	-1.21	4447	0.8874	-0.7817	2897	0.587	-0.8493	3567	0.7184	0.827	1092	0.2182	0.763734	0.902421	1.06519	0.721329	1.05153	-0.534752	0.807512	0.36332
BAAT	1.16	1057	0.172	0.9188	1881	0.351	0.7053	1970	0.369	1.22	676	0.1303	1.02	1219	0.2385	1.01	1452	0.2816	-0.8061	2978	0.602	1.02	1392	0.2642	-1.24	4364	0.8732	0.922865	1.54439	1.10588	1.23274	1.21035	1.45087	1.37502	1.78866
BACE1	1.27	695	0.101	0.4832	3001	0.589	1.16	801	0.139	1.24	638	0.123	0.6772	2209	0.4397	0.8313	1999	0.4057	0.8763	1372	0.272	1.6	54	0.0074	-0.661	1989	0.3976	0.118397	-1.07927	-0.731963	-1.79599	-1.46535	0.162735	-1.27024	-0.693013
BACE2	1.18	982	0.163	1.21	867	0.147	-1.3	4477	0.907	-1.79	5034	0.9976	-1.03	3885	0.7876	0.9171	1752	0.3405	-1.32	4627	0.918	-1.35	4660	0.934	1.03	662	0.1209	1.10734	0.366512	-0.538986	-0.084462	0.386579	-0.563481	0.696566	0.915865
BACH1	0.7204	2447	0.466	1	1585	0.289	-0.8754	3262	0.653	-0.8601	3618	0.7306	-1.25	4415	0.8916	1.17	859	0.1604	-1.15	4138	0.837	0.6572	2468	0.4857	-1.02	3391	0.6976	-0.022943	-0.192325	-0.013654	-0.770869	1.06303	-0.564871	0.088243	0.505838
BAD	0.745	2376	0.451	1.19	930	0.15	-1.06	3826	0.773	-1.24	4478	0.9045	-0.5888	2743	0.5401	-1.54	4905	0.9761	0.6547	1919	0.377	1	1441	0.265	1.8	24	0.0035	1.5678	1.23082	1.10319	1.50059	0.423502	-0.057485	-0.251748	-0.389127
BAG1	1.1	1262	0.21	0.9386	1798	0.336	-0.555	2478	0.48	0.7682	2204	0.4383	0.7276	2087	0.4103	0.4939	2811	0.5714	0.8938	1328	0.261	1.18	847	0.1548	0.5537	1622	0.3186	0.640873	-0.252842	0.746055	-0.226255	0.043988	1.29308	0.004557	0.710821
BAG3	-0.7145	3279	0.649	-0.7825	3500	0.705	0.4546	2344	0.451	-0.8124	3492	0.708	0.8195	1822	0.3552	-1.13	4311	0.8606	0.8249	1509	0.302	0.7616	2189	0.4279	-0.9321	3021	0.6071	-0.650359	-1.5205	-0.916401	-0.648831	-1.20861	-0.583215	-1.14506	-1.65944
BAG4	1.54	135	0.018	1.22	837	0.142	0.7253	1916	0.36	1.02	1377	0.2573	-0.5778	2721	0.537	-0.5601	2973	0.6013	1.14	798	0.14	0.7211	2304	0.46	1.41	224	0.0331	0.544642	0.398102	-0.263983	0.283179	-0.815989	-0.423021	-0.78877	-0.233148
BAG5	-1.41	4599	0.951	-1.26	4476	0.916	-1.08	3873	0.783	-0.7862	3421	0.6942	0.9385	1431	0.2847	0.7643	2226	0.4501	-0.6082	2449	0.492	-0.9714	3879	0.7827	-1.25	4394	0.8794	-0.4544	-0.571299	0.122605	-0.836582	0.227804	0.181899	0.490206	0.340844
BAI1	1.19	951	0.15	0.4284	3019	0.593	1.36	409	0.062	-0.9755	3925	0.7879	1.14	914	0.1759	-1.02	4083	0.8137	-0.9267	3384	0.683	-0.6088	2991	0.595	-0.6818	2053	0.4315	0.395535	-0.826301	-0.068923	0.167859	0.326714	-0.01976	0.542906	0.001762
BAIAP2	1.22	849	0.137	1.22	817	0.139	-1.59	4953	0.988	1.2	745	0.1423	-0.6566	2869	0.5791	0.7718	2205	0.4451	-0.7874	2921	0.59	1.13	1019	0.1891	1.36	264	0.0476	0.357181	-0.012007	-0.067231	0.355346	-0.399858	-0.027353	-0.861219	0.505582
BAK1	1.33	528	0.074	1.16	1032	0.177	-0.4017	2364	0.453	0.6162	2617	0.5258	-1.06	3982	0.7995	-1.05	4144	0.8301	0.6768	1867	0.38	-0.7915	3408	0.6869	1.38	248	0.0438	1.51079	0.748257	0.252702	0.45264	0.691358	0.453841	-0.272655	1.19877
BAP1	-1.6	4860	0.987	-0.8738	3727	0.758	-0.9856	3584	0.726	-1.2	4403	0.8842	-1.29	4532	0.9101	0.4159	2860	0.5795	-0.916	3348	0.677	-0.9691	3872	0.7811	0.9666	794	0.1549	0.228188	0.318174	-0.551967	0.610109	0.204417	-0.372705	-0.193128	-0.121325
BAX	-0.4516	2911	0.567	1.07	1344	0.238	-1.33	4553	0.925	-1.05	4083	0.8233	0.8623	1695	0.3372	-0.5561	2970	0.5975	-1.17	4198	0.848	-1.27	4504	0.8977	-1.16	4003	0.8189	0.625034	-0.091952	0.256365	0.85618	0.468818	1.12796	0.964339	-0.61963
BBC3	0.869	2012	0.371	0.4942	2996	0.597	0.8046	1706	0.315	-0.7083	3228	0.6462	-0.7658	3167	0.6257	-1.25	4530	0.9069	-0.6836	2632	0.517	1.04	1312	0.2414	1.64	74	0.0107	1.02533	0.591064	0.877982	1.46199	0.778459	1.48769	-0.113172	-0.187533
BBOX1	1.24	804	0.12	1.48	208	0.025	-1.03	3712	0.748	1.09	1110	0.2189	0.9021	1555	0.3131	-1.38	4740	0.9408	1.43	278	0.045	1.32	455	0.075	0.8247	1099	0.2363	0.039871	-0.095755	1.09013	0.278033	-0.382739	0.637251	0.004318	0.862833
BBS1	1.4	375	0.051	1.36	415	0.064	1.57	124	0.018	0.916	1721	0.3272	-0.6763	2916	0.5784	0.8237	2015	0.4064	0.8453	1444	0.278	0.6881	2389	0.4776	-0.7839	2408	0.4631	-1.00687	-0.43775	-0.269059	-0.783479	-0.568661	0.177905	-0.148111	-0.010646
BBS2	-0.7149	3280	0.655	0.6356	2788	0.552	0.7334	1900	0.355	-1.17	4351	0.8737	1.02	1201	0.2348	-0.7788	3460	0.7005	0.8418	1455	0.292	0.906	1752	0.3356	-1.26	4399	0.8813	-0.188276	-0.027148	0.730789	-0.249898	-0.716339	-0.377889	1.10226	0.072576
BBS4	1.46	246	0.033	1.08	1315	0.232	-0.5635	2494	0.483	-0.5039	2897	0.5736	1.51	126	0.0262	-1.17	4385	0.881	1.57	106	0.02	-0.6981	3172	0.6354	0.9392	848	0.1534	-0.419086	-0.487114	0.360775	-0.077665	-0.498296	-0.504962	0.77268	0.768012
BCAP29	1.22	844	0.128	0.7483	2474	0.472	1.32	483	0.076	1.42	227	0.0337	1.33	422	0.0744	1.44	181	0.0254	1.2	671	0.129	1.24	663	0.1167	-1.25	4373	0.8852	0.73061	0.300378	-0.162731	0.537396	-0.031623	1.62822	0.964447	0.864649
BCAP31	0.6298	2657	0.517	0.5235	2971	0.58	-0.5567	2482	0.481	-1.19	4393	0.8769	-0.4696	2586	0.5227	-0.9283	3857	0.7709	0.8609	1405	0.292	-1.18	4328	0.8639	0.9293	868	0.1856	1.80442	1.09221	1.11118	0.713505	0.725262	1.2987	1.11557	0.636304
BCAR1	-1.03	3986	0.821	0.7614	2427	0.464	-1.52	4889	0.98	0.697	2423	0.4857	0.8546	1729	0.3335	0.7441	2285	0.4662	-1.13	4070	0.819	1.11	1083	0.2034	-0.9142	2939	0.5902	0.627778	0.4572	0.872622	0.561728	0.657074	0.728677	0.206932	0.700804
BCAT1	1.25	778	0.115	1.14	1121	0.194	0.9931	1208	0.214	-1.09	4193	0.8398	-0.7471	3121	0.6277	0.5883	2699	0.5371	-0.673	2596	0.533	0.7598	2198	0.4305	-1.02	3413	0.702	0.245268	-0.625706	0.131541	-0.529515	0.316267	-1.85087	0.047304	-0.250401
BCAT2	1.26	728	0.106	1.07	1348	0.239	1.25	627	0.102	1.31	439	0.0787	-0.9776	3737	0.7566	0.932	1702	0.3364	0.58	2081	0.421	1.13	1027	0.1914	-0.889	2836	0.5673	-1.40816	-1.28043	-1.42849	-1.09676	-1.34394	-0.82002	-1.09355	-0.886517
BCHE	1.46	235	0.031	1.38	367	0.056	1.21	716	0.116	-1.27	4530	0.9111	0.7309	2077	0.4009	-0.6289	3093	0.6249	-1.42	4795	0.954	-0.8693	3626	0.7315	-0.7357	2233	0.426	0.247682	0.015468	0.05695	-0.370108	0.840419	0.384995	-0.238129	-0.405908
BCKDHA	0.564	2780	0.543	-1.05	4122	0.845	1.64	76	0.01	-0.7216	3255	0.6564	-1.21	4333	0.8755	-1.13	4317	0.857	-1.43	4812	0.97	-1.58	4954	0.989	-0.8009	2473	0.5094	-0.005865	-0.236405	0.018107	0.709746	0.578955	-0.177081	0.078788	0.159918
BCKDHB	1.04	1466	0.253	0.4884	2998	0.588	0.9623	1291	0.228	-0.7311	3279	0.6647	0.591	2385	0.4789	0.5766	2718	0.5515	-0.7162	2713	0.547	1.29	522	0.095	1.14	504	0.0925	1.48702	0.752243	0.577724	0.277458	0.099198	0.014357	-0.297373	0.7389
BCKDK	0.8606	2038	0.378	1.14	1096	0.192	-0.7576	2933	0.583	1.28	535	0.1013	1.52	121	0.0259	0.7678	2217	0.4441	0.7129	1774	0.349	1.17	888	0.1622	-1.57	5012	0.9899	-1.29918	-1.25998	-1.14065	-0.70859	-0.62058	-0.114063	-0.925458	0.6934
BCL10	0.872	2007	0.365	-0.5947	3123	0.62	1.1	937	0.163	-0.5105	2902	0.5789	0.5858	2398	0.4812	-1.43	4795	0.9548	1.5	185	0.029	-1.58	4955	0.9842	1.56	118	0.0209	0.648152	1.15085	0.799161	1.68437	0.05037	0.950855	1.54102	0.93414
BCL11A	1.78	8	0	1.59	72	0.01	0.7791	1772	0.329	0.8038	2095	0.415	-1.45	4849	0.9636	0.9922	1503	0.2945	-0.5863	2408	0.484	-1.35	4668	0.9327	1.2	438	0.0779	-0.769193	-0.699745	-0.473849	-0.415219	-0.790189	-1.28466	-0.56635	-0.693108
BCL11B	1.39	401	0.055	1.52	146	0.016	-0.7813	2986	0.593	0.985	1481	0.2906	-0.5211	2643	0.5294	-1.3	4608	0.9155	1.42	289	0.05	0.9267	1691	0.3222	1.76	37	0.0043	-0.038473	-0.070089	-0.267478	-0.055745	-1.49693	-0.319964	-0.947616	-0.527462
BCL2	0.7596	2333	0.44	-1.38	4619	0.944	1.47	239	0.032	-1.23	4456	0.8898	-0.5359	2665	0.5376	-1.31	4632	0.9184	0.5847	2069	0.433	-1.4	4753	0.9502	-0.8406	2629	0.542	0.500598	0.345054	-0.489962	0.983048	0.16278	-0.11103	0.6537	-0.652261
BCL2A1	0.5033	2854	0.569	0.766	2411	0.477	-0.8095	3072	0.614	-1.53	4912	0.9748	1.26	591	0.1129	-1.71	5023	0.9939	1.06	976	0.17	0.6773	2410	0.4841	1.24	395	0.0639	0.950105	0.218961	1.2127	1.02938	0.457771	0.233852	0.876323	0.338863
BCL2L1	1.27	715	0.11	0.9419	1789	0.335	1.17	774	0.129	-1.27	4532	0.9064	1.48	166	0.028	-1.25	4528	0.9017	0.8318	1492	0.298	1.57	72	0.0098	-0.982	3223	0.6523	0.159751	-2.90677	1.49663	-2.24152	-0.31035	0.696421	0.421502	0.138002
BCL2L10	-0.8039	3475	0.704	0.8065	2271	0.445	-1.3	4473	0.907	-0.6325	3072	0.6093	1.39	305	0.0609	0.9067	1781	0.348	1.32	440	0.078	0.8498	1924	0.3716	-1.17	4084	0.8131	1.33629	1.06103	0.58357	1.55686	0.057759	0.395321	1.34284	1.64053
BCL2L11	1.41	347	0.047	1.05	1427	0.256	1.09	964	0.169	0.8388	1976	0.3913	1.01	1232	0.24	1.41	250	0.0427	-1.01	3672	0.732	1.49	144	0.023	-0.8427	2638	0.5257	0.904377	0.221715	-0.36479	-0.289183	0.044108	-0.421472	0.096216	-0.027102
BCL2L14	1.2	914	0.15	1.57	89	0.012	-1.13	4025	0.82	-1.22	4428	0.8959	-0.7685	3172	0.6275	-0.8084	3545	0.7108	1	1086	0.194	-0.8375	3529	0.7138	1.33	293	0.0466	0.972928	0.193228	0.065886	0.193777	-0.267261	-0.373835	-0.41508	-0.531546
BCL2L2	-0.8239	3515	0.717	-1.17	4331	0.891	0.8549	1564	0.286	0.8228	2029	0.3971	-0.4963	2612	0.517	0.8644	1923	0.3783	0.622	1990	0.392	0.8985	1777	0.3389	0.9737	774	0.1397	2.09849	1.47629	1.34306	0.642125	1.47272	1.01336	0.744828	0.527081
BCL3	-1.57	4826	0.982	-1.18	4347	0.894	-0.8091	3071	0.614	1.05	1263	0.2377	-1.05	3942	0.7972	-0.5464	2958	0.5974	-1.16	4177	0.836	-0.7825	3385	0.683	-1.23	4319	0.8566	-1.26441	-2.04745	-0.542158	-0.773267	-0.219404	-1.00024	-1.51137	-0.70048
BCL6	0.5068	2850	0.569	1.49	182	0.024	-1.25	4349	0.886	0.7468	2278	0.4525	1.4	285	0.0525	-0.7459	3363	0.6833	1.55	129	0.02	1.35	377	0.0704	-0.6076	1879	0.3725	-0.420348	-0.579177	-0.885315	-0.358215	-1.47685	-0.461188	-0.802151	-0.544091
BCL7A	0.8304	2131	0.393	1.06	1388	0.248	0.9286	1377	0.247	-1.57	4938	0.9804	-1.35	4662	0.9332	-0.462	2878	0.5842	-1.13	4104	0.825	-1.63	4980	0.9889	1.11	535	0.1024	0.013542	-0.5909	-1.11437	0.22021	-0.339105	-0.030522	-0.276462	-0.471396
BCL9	1.5	182	0.021	-1.02	4053	0.828	1.47	250	0.033	1.48	140	0.0259	-0.7015	2987	0.6022	1.34	381	0.0687	-0.7451	2794	0.565	1.01	1406	0.2678	-0.8224	2555	0.5084	-0.848664	-0.627947	-1.27257	-0.731686	-0.703014	0.637969	-1.55117	-0.151807
BCMO1	1.47	222	0.027	1.39	347	0.052	0.9909	1213	0.215	-0.9025	3732	0.7584	1.03	1187	0.2302	0.5851	2705	0.5485	-0.6407	2509	0.506	1.11	1103	0.2055	-0.7428	2267	0.4483	-0.022822	-1.64444	-0.634666	-1.30155	-0.71794	-1.45185	-0.829277	-0.774506
BCR	1.05	1423	0.242	-0.8807	3742	0.77	0.9805	1245	0.219	0.6262	2596	0.5162	-1.77	5040	0.9985	1.2	769	0.1498	-1.27	4496	0.894	1.21	738	0.1372	-0.7362	2237	0.4264	-0.685395	-0.661488	-0.996318	-1.67965	-0.42483	-1.13229	-1.72481	-0.957083
BDH1	-0.8536	3583	0.727	-0.6452	3199	0.637	-1.3	4471	0.908	-1.04	4071	0.8209	-0.7971	3252	0.6549	0.5029	2805	0.5614	-0.5773	2393	0.495	-1.08	4128	0.8204	0.6036	1572	0.3351	1.1398	1.27139	0.483846	0.873802	0.54118	-0.149317	0.830692	0.690403
BDH2	1.16	1060	0.173	1.18	951	0.157	-0.7941	3024	0.601	-0.7831	3410	0.6894	1.2	703	0.1333	-1.41	4768	0.9488	-1.15	4145	0.84	-0.8727	3643	0.7266	-0.8448	2646	0.5448	-0.251782	-0.596434	0.391333	1.13511	0.185856	-1.4428	0.837917	0.622825
BDKRB1	0.7772	2282	0.438	-1.22	4419	0.91	1.01	1146	0.204	1.11	1018	0.1977	-1.4	4756	0.9495	0.711	2372	0.487	-1.02	3722	0.741	-0.854	3579	0.7214	1.34	280	0.05	0.056902	0.289244	-0.22636	-0.31573	0.116871	-0.65564	-0.544932	-0.59415
BDKRB2	-0.7376	3322	0.667	-1.26	4466	0.92	-0.6694	2707	0.531	1.2	750	0.1434	-0.5656	2699	0.5405	0.7099	2376	0.4876	-0.8709	3188	0.642	0.487	2749	0.548	-1.02	3420	0.6925	0.404386	-0.00055	-0.98336	1.13078	0.311185	1.51162	-0.398637	0.309777
BDNF	0.9075	1895	0.342	0.9807	1666	0.309	-1.02	3677	0.742	-0.9927	3970	0.8021	0.6113	2348	0.4714	-0.6122	3057	0.6201	-1.06	3858	0.769	0.8241	1989	0.3892	-1.02	3392	0.6874	0.627222	0.413759	1.31233	0.278574	0.553163	1.23955	0.441154	0.35975
BECN1	0.7658	2315	0.447	-0.791	3519	0.718	1.13	876	0.15	-0.657	3115	0.62	0.6407	2291	0.4508	1.52	80	0.0223	-1.04	3781	0.751	0.8671	1870	0.36	0.7148	1369	0.2455	0.67045	0.100181	-0.341774	-0.884354	-0.073083	-0.286419	-0.089551	0.021535
BET1	1.4	376	0.05	0.8777	2038	0.381	1.29	538	0.087	-0.7725	3380	0.6829	-0.7716	3179	0.6407	0.6905	2432	0.494	-0.5844	2406	0.497	-0.9935	3933	0.7837	-0.5277	1756	0.3698	-0.303484	-0.874389	-0.749281	-0.07301	0.047772	-0.937893	-0.400243	0.375403
BET1L	1.11	1234	0.204	1.01	1569	0.286	0.8349	1607	0.298	-0.6826	3176	0.6391	0.7445	2028	0.4008	1.03	1375	0.2638	1.49	207	0.032	1.62	44	0.006	-0.6677	2007	0.3998	1.65175	1.11729	1.05697	0.331612	0.024676	1.21597	0.748846	-0.071707
BFAR	1.41	357	0.049	1.44	252	0.037	-1.05	3777	0.772	1.03	1336	0.2502	1.26	570	0.1097	0.7603	2241	0.4489	1.11	874	0.151	-0.7792	3377	0.6808	-0.9161	2949	0.5775	-0.476332	-0.504968	-1.21467	-0.581865	-1.15423	-0.817924	-0.019169	-0.052505
BGLAP	-1.41	4605	0.952	-0.5917	3116	0.618	-1.32	4526	0.916	-1.29	4566	0.9108	1.06	1129	0.2156	-1.17	4390	0.8761	-0.9	3300	0.665	1.44	217	0.0375	-0.9015	2887	0.5787	-0.643896	-1.75134	-0.164014	-0.712214	-0.171019	-0.961794	-0.275224	-0.793431
BGN	1.3	618	0.088	-0.566	3086	0.612	1.33	461	0.073	-0.7	3213	0.647	1.29	502	0.0933	-1.03	4111	0.8229	1.64	62	0.007	-0.7931	3413	0.6877	-0.8375	2615	0.5214	0.294471	-0.080499	-0.736951	0.079003	-0.770454	-1.72969	0.462134	0.782772
BHLHB2	1.75	9	0	1.26	693	0.118	-0.5881	2533	0.491	-1.27	4533	0.9065	1.17	825	0.1585	-1.07	4196	0.8374	-0.6844	2635	0.529	0.5055	2733	0.5437	-0.9311	3016	0.606	0.819532	1.06124	1.29691	1.51187	0.954938	0.847769	1.25499	1.27408
BHLHB3	-1.08	4075	0.846	-0.8486	3666	0.752	-1.1	3937	0.801	-1.37	4698	0.9386	1.15	874	0.1593	-0.621	3074	0.6215	-1.13	4084	0.817	0.4847	2752	0.5524	-0.9246	2995	0.5867	-0.237522	-0.977469	0.259978	0.267115	-0.014024	0.128654	0.752243	-0.573378
BHLHB8	1.48	207	0.025	1.52	149	0.016	-0.8466	3180	0.635	1.39	262	0.0474	0.7837	1919	0.378	-0.9227	3844	0.775	0.9014	1308	0.256	0.8093	2049	0.3978	1.3	326	0.0558	0.292483	0.301394	-0.296646	0.8785	-0.491368	0.543708	-0.551726	0.765913
BHLHB9	1.13	1162	0.192	-1.51	4772	0.97	1.55	142	0.018	1.3	476	0.0789	-0.8238	3319	0.6699	1.18	836	0.1539	-0.5394	2343	0.484	0.7443	2248	0.4395	-0.9989	3293	0.6802	0.848694	0.877067	0.370684	0.595315	0.615511	1.60365	1.00832	1.49742
BHMT	1.09	1289	0.216	0.6853	2646	0.527	0.7284	1908	0.358	-1.48	4853	0.9646	-0.7176	3026	0.61	0.9164	1757	0.3484	-0.7908	2934	0.593	-1.03	4016	0.8091	-1.27	4460	0.8915	0.834158	-0.030543	0.005819	0.277925	0.227666	0.377244	1.5939	-0.67984
BHMT2	1.29	647	0.099	1.38	365	0.055	-0.7182	2828	0.558	-1.1	4206	0.8489	1.12	953	0.1793	-1.53	4901	0.975	1.1	892	0.162	0.7517	2227	0.4343	1.7	54	0.0082	-0.406925	-0.864438	-0.723402	-0.160829	-1.15644	-0.851999	-1.54115	-1.10496
BID	1.29	641	0.091	1.16	1019	0.176	-0.6706	2710	0.531	1.47	149	0.0279	0.6702	2223	0.4426	1.13	1005	0.1957	1.09	913	0.168	1.48	165	0.0271	-0.8487	2663	0.5315	-2.21197	-2.04281	-2.10048	-2.39318	-2.00622	-0.34205	-1.85796	-1.05702
BIK	0.8321	2121	0.4	0.7705	2396	0.473	-0.6602	2683	0.526	1.51	100	0.0229	-1.59	4980	0.9865	1.27	535	0.1073	1.16	747	0.133	0.4592	2764	0.5562	0.6641	1467	0.2657	-0.146737	-0.284073	-1.5114	-0.498567	-0.387351	0.393525	-1.01262	-1.47801
BIN1	-1.33	4482	0.932	-1.08	4170	0.859	-0.7959	3033	0.606	1.37	318	0.0649	-1.23	4363	0.8847	1.48	118	0.0292	-1.28	4530	0.9	1.2	804	0.1467	-1.2	4188	0.8309	1.12753	0.556903	0.425244	-0.513959	0.37739	1.4938	0.643041	1.1425
BIRC2	-1.33	4490	0.929	-1.15	4293	0.88	0.7749	1785	0.33	-1.24	4479	0.8945	-1.47	4874	0.9723	0.9637	1610	0.3157	-0.9116	3336	0.672	-1.47	4824	0.9678	1.08	587	0.1239	1.44898	1.43192	0.862947	1.60801	1.02581	0.906633	1.36113	1.33055
BIRC3	-0.4736	2920	0.572	-0.9516	3910	0.799	0.6972	1986	0.373	0.9381	1649	0.3228	-1.11	4085	0.8268	0.8725	1902	0.3764	-1.32	4622	0.921	-1.27	4519	0.9065	-1.2	4206	0.846	0.144192	1.28034	0.936626	1.22939	1.362	0.617431	1.47171	0.759753
BIRC5	-1.43	4628	0.956	-1.77	4999	0.997	1.74	34	0.003	-1.47	4843	0.9629	1.28	514	0.0967	1.17	879	0.171	-0.977	3552	0.715	0.6876	2390	0.4706	-0.8472	2657	0.5303	1.6583	0.162056	-0.563902	0.905073	0.64334	0.606175	0.926959	0.349656
BLK	-0.7557	3355	0.671	-1.04	4094	0.839	1.02	1132	0.202	1.01	1384	0.2719	-1.3	4540	0.912	0.5159	2791	0.5669	-1.05	3819	0.759	-1.31	4605	0.9224	-0.9429	3061	0.6156	-1.1597	-1.3931	-1.0371	-0.182129	-0.739413	-0.414349	-0.760006	-0.354914
BLM	1.18	969	0.153	1.32	517	0.08	-0.9079	3363	0.676	1.21	720	0.1385	-0.8816	3462	0.7059	0.7116	2367	0.4868	1.31	459	0.082	0.8951	1793	0.3429	0.9457	834	0.1627	0.633973	0.428417	-0.40675	0.366736	-0.282975	0.169116	-0.022383	0.083755
BLMH	-1.69	4935	0.995	-0.9877	3988	0.815	-1.29	4445	0.903	-0.9371	3829	0.7769	0.8378	1770	0.3446	-0.9004	3789	0.764	-0.7108	2702	0.544	0.6619	2461	0.4857	-0.7538	2302	0.4559	1.39452	0.930344	0.770405	1.36598	1.1742	1.45287	1.08689	1.66377
BLNK	1.33	544	0.075	-0.804	3546	0.718	1.46	256	0.034	-1.27	4526	0.9062	1.12	966	0.1815	-1.13	4318	0.8621	-1.13	4089	0.823	1.02	1379	0.2601	-0.8273	2570	0.5115	0.952452	-0.171099	0.260457	0.393331	0.460919	-0.328173	0.186962	0.34387
BLR1	-1.03	3974	0.825	-0.9323	3867	0.798	0.61	2176	0.418	-0.9839	3946	0.7976	1.44	224	0.0444	-1.55	4916	0.977	1.29	485	0.086	1.25	629	0.1194	1.03	666	0.1215	1.35093	1.07781	1.53422	1.65373	0.502422	1.52839	0.741483	1.32932
BLVRA	-1.65	4912	0.993	-1.87	5029	0.999	1.45	267	0.036	1.38	282	0.0507	1.01	1226	0.2391	1.24	628	0.122	-0.5969	2427	0.488	-0.8194	3477	0.7024	-1.28	4490	0.898	0.608033	0.279234	0.194372	0.373391	0.221722	0.885212	0.350927	1.19384
BLVRB	-0.9324	3782	0.772	-1.56	4845	0.98	0.6558	2078	0.394	0.9909	1462	0.286	1.33	420	0.0789	1.36	320	0.058	1.48	219	0.035	1.23	697	0.1251	1.09	560	0.1097	0.042236	0.048415	-0.378968	-0.579687	-1.03883	-0.200055	-0.533075	-0.950375
BMI1	-0.579	3010	0.592	-1.19	4372	0.896	0.8988	1458	0.262	-1.15	4306	0.866	-1.02	3854	0.7781	-0.9263	3850	0.7758	-1.25	4439	0.888	-0.8614	3599	0.7249	-0.8482	2662	0.5312	0.706001	0.527503	1.07155	1.00768	1.24964	-0.20343	0.893102	1.21387
BMP1	-0.6795	3199	0.639	0.8669	2076	0.396	-1.08	3886	0.791	-1.43	4786	0.9541	0.788	1907	0.3754	-1.49	4857	0.9667	-0.7679	2862	0.579	-1.21	4379	0.882	1.12	528	0.1004	0.879386	0.599518	1.11284	1.15375	0.798141	0.235739	0.758327	1.27911
BMP10	-0.9329	3783	0.781	1.06	1394	0.249	-1.8	5031	0.999	-0.7671	3372	0.6769	1.14	891	0.1617	-0.978	3984	0.8029	0.6082	2031	0.397	-0.9708	3878	0.7843	1.18	454	0.0754	0.648443	1.23908	1.04538	1.81604	0.897852	0.393145	1.53343	1.3008
BMP15	-1.12	4154	0.863	-1.75	4988	0.995	1.23	671	0.106	-0.99	3964	0.801	-1.78	5042	0.9987	0.7709	2208	0.4419	-1.37	4720	0.938	-1.72	5024	0.9955	0.4958	1660	0.2978	1.14315	0.824723	-0.574832	0.525632	1.1423	-0.050327	0.021385	-0.32725
BMP2	0.9624	1720	0.304	1.14	1099	0.19	-0.5536	2474	0.48	-0.7494	3326	0.6747	0.7202	2103	0.4148	-0.9062	3807	0.7674	-1.4	4776	0.953	1.12	1063	0.1988	-1.32	4605	0.9194	0.089246	-0.306851	0.202515	0.922516	1.54292	0.466984	0.077937	0.905193
BMP3	1.16	1034	0.167	1.13	1145	0.199	-0.8829	3286	0.658	-0.9357	3827	0.7676	1.17	822	0.1576	-0.5672	2979	0.6016	0.7968	1578	0.33	1.22	711	0.1272	-0.9455	3078	0.6295	0.652477	0.517958	1.03341	0.083908	0.560209	0.658229	0.882675	0.974356
BMP4	1.42	325	0.046	1.26	694	0.118	0.7193	1934	0.364	0.9193	1711	0.3242	-1.49	4894	0.97	0.6645	2510	0.512	-1.3	4575	0.908	-1.35	4679	0.9366	-0.7489	2288	0.4341	-0.504405	-0.143211	-0.450998	-0.883757	-0.251639	-0.410965	-1.07639	-0.547026
BMP5	1.42	323	0.045	0.8427	2151	0.414	1.11	912	0.156	1.22	678	0.1314	0.6982	2155	0.4215	0.9595	1619	0.3066	0.6992	1810	0.356	1.55	83	0.0148	-1.07	3646	0.7208	-0.930218	-0.725108	0.26056	-0.071732	-0.827476	0.543909	-0.234309	0.441669
BMP6	-0.7796	3407	0.683	0.8032	2284	0.434	-0.7014	2781	0.546	-1.06	4125	0.8289	1.19	744	0.1424	-0.8128	3556	0.7123	0.8986	1313	0.27	-0.9396	3800	0.7584	0.7602	1258	0.2726	-0.048521	-0.109289	-0.81884	0.963933	-0.837084	-0.664858	-0.01434	-0.147606
BMP7	1.51	174	0.023	1.45	239	0.034	-0.7491	2909	0.577	1.42	225	0.0477	0.7498	2014	0.3902	1.11	1077	0.2054	1.17	726	0.129	1.19	809	0.1482	-1.16	4017	0.7987	-0.590661	-0.537582	-0.728395	-0.675737	-0.915816	-0.259582	-0.5601	-0.196646
BMP8A	1.28	678	0.1	0.9207	1872	0.349	0.901	1452	0.261	-0.5956	3003	0.5991	1.36	349	0.0591	-0.8185	3568	0.7159	1.36	374	0.068	1.51	128	0.0138	0.8452	1066	0.2254	0.671451	0.1892	1.50977	0.182968	0.089306	0.761652	0.632123	1.59319
BMP8B	1.69	25	0.003	1.13	1139	0.197	0.9738	1263	0.221	-0.6546	3109	0.6251	1.43	233	0.0349	-0.7767	3453	0.6928	0.7738	1650	0.341	-0.6577	3080	0.6142	0.866	1016	0.2148	1.06641	0.761913	1.07421	0.936374	0.876508	1.25045	1.13068	1.15529
BMPR1A	-1.19	4263	0.887	-0.8306	3621	0.732	-0.9791	3564	0.722	-0.6047	3018	0.605	-0.7898	3223	0.648	0.532	2776	0.5632	1.15	776	0.143	-1.47	4831	0.9646	1.25	379	0.064	0.574358	0.3242	-0.930522	-0.169346	-0.546125	-0.739002	0.05253	-0.869056
BMPR1B	0.9167	1860	0.332	-0.5219	3053	0.616	1.09	958	0.166	-0.8636	3626	0.738	-1.17	4230	0.8567	1.26	553	0.1087	-0.8709	3187	0.642	-0.8342	3518	0.7105	-0.8709	2760	0.5503	1.00418	0.374217	1.00239	-0.526131	0.419726	1.75736	-0.103712	-0.027606
BMPR2	0.5876	2737	0.535	1.18	950	0.157	-1.17	4132	0.84	1.18	841	0.1531	1.4	273	0.0448	0.5619	2743	0.5464	1.5	189	0.027	1.27	581	0.1022	-1.03	3443	0.7071	0.869152	0.080201	0.574613	1.38869	0.177942	1.75314	1.10194	0.952319
BNIP1	-0.6639	3172	0.633	-0.9807	3974	0.82	0.7033	1974	0.373	0.8314	2001	0.3908	0.9453	1412	0.2693	0.5965	2682	0.5417	1.44	262	0.044	0.9978	1465	0.2694	0.848	1057	0.1881	0.738416	0.419294	-0.408539	0.186302	-0.767522	0.001471	-0.642534	0.115246
BNIP2	0.6669	2579	0.498	0.6426	2764	0.536	1.02	1130	0.202	0.5488	2729	0.5497	-0.7599	3150	0.6317	1.25	591	0.116	-0.7709	2868	0.581	0.8415	1947	0.3782	1.05	641	0.126	0.974294	0.326383	-0.27142	-1.15502	0.329659	0.659098	-0.402626	0.506037
BNIP3	-1.05	4035	0.834	1.05	1441	0.258	-1.16	4111	0.837	1.29	516	0.098	1.48	173	0.0344	-1.57	4936	0.98	1.51	176	0.03	1.6	56	0.0103	0.722	1354	0.2425	0.009327	-1.54345	0.702471	0.947871	-0.728297	0.72498	-0.4797	0.89247
BNIP3L	-1.24	4321	0.902	-1.17	4329	0.887	0.4552	2343	0.451	1.47	141	0.0266	-1.08	4021	0.8095	0.9969	1485	0.291	-0.6723	2595	0.522	-1.15	4272	0.862	-1.09	3736	0.7502	-0.252163	0.531041	0.251271	0.912512	0.760996	1.58417	0.987406	1.65761
BOK	-0.5298	2954	0.581	-0.9183	3835	0.781	0.4346	2352	0.452	-0.7013	3216	0.6475	0.7651	1965	0.3871	0.7795	2178	0.4399	1.11	869	0.157	-0.6943	3165	0.6375	-1.07	3665	0.7382	1.36956	0.774154	0.385621	0.750192	0.570308	-0.09969	1.50958	1.47636
BP75	1.39	392	0.053	1.24	734	0.117	0.6747	2036	0.385	-0.4532	2861	0.5718	-1.44	4832	0.9613	0.7795	2177	0.4399	-0.7424	2787	0.564	-1.5	4865	0.9705	-0.9251	2997	0.5997	-1.43158	-0.196282	-1.02187	-0.558429	0.131842	-1.61911	-0.604284	-0.849341
BPNT1	-1.13	4173	0.863	0.6419	2769	0.536	-1.13	4012	0.816	-0.765	3366	0.6835	-1.35	4654	0.9321	0.9106	1770	0.3518	-0.9049	3314	0.668	-1.49	4848	0.9676	-0.6631	1993	0.3981	0.398593	0.372023	-0.992398	0.579411	0.964749	0.23333	0.614173	-1.06604
BPTF	-0.9203	3756	0.765	0.9572	1742	0.324	-1.29	4449	0.904	0.8086	2073	0.4146	-1.4	4758	0.9546	0.9867	1531	0.2998	-1.13	4073	0.825	-1.38	4731	0.945	-0.9399	3047	0.6247	-1.93549	-1.89209	-1.88804	-1.09438	0.147261	-1.6823	-0.966639	-1.1018
BRAF	-1.05	4029	0.828	-1.39	4639	0.948	1.17	777	0.135	1.39	263	0.0476	0.8566	1718	0.3318	1.07	1225	0.237	-0.8823	3242	0.65	1.2	797	0.1453	-0.53	1758	0.3452	0.261687	-0.453728	-0.574477	-0.386863	-0.691959	0.617362	-0.911582	-0.075324
BRCA1	1.69	27	0.003	1.21	863	0.138	-0.7235	2842	0.557	1.02	1376	0.2691	0.659	2251	0.4485	-1.39	4749	0.9441	0.6942	1830	0.37	-1.03	4020	0.8098	-0.9424	3058	0.6156	-0.237437	-0.293178	-0.090002	1.04409	-0.162055	0.31068	0.635355	-0.161904
BRCA2	0.8964	1922	0.351	0.5862	2882	0.562	0.7803	1769	0.327	-1.2	4409	0.8805	0.9544	1392	0.2831	-1.6	4970	0.9885	1.7	36	0.002	-0.815	3470	0.6965	1.77	34	0.0026	0.265553	0.066652	0.866854	0.970353	-1.178	-0.570929	-0.15123	-0.252293
BRD4	-1.8	5000	0.997	-1.32	4551	0.936	-1.24	4306	0.878	1.1	1065	0.2076	0.8829	1618	0.3156	1.05	1312	0.2514	1.11	883	0.159	-0.9127	3744	0.7534	-1.46	4900	0.9734	-0.354812	-0.806735	-1.19312	-0.092519	-0.462472	-0.217297	0.428843	-0.267309
BRS3	1.52	164	0.021	1.62	57	0.007	-0.7316	2866	0.567	-1.41	4748	0.9478	-0.7409	3100	0.6214	-1.19	4419	0.8822	1.17	739	0.136	0.7319	2281	0.4457	-0.8582	2707	0.5389	0.469602	-0.082034	0.849221	0.423838	-0.297278	-0.171058	0.368228	-0.329726
BRUNOL4	1.3	605	0.086	1.29	587	0.093	-0.785	2996	0.595	1.05	1241	0.2453	0.9698	1348	0.2754	0.5946	2688	0.5346	1.12	843	0.163	1.39	295	0.0459	-1.29	4522	0.9135	-0.9299	-1.72446	-0.881474	-1.4704	-0.8553	-0.208289	-0.825528	-0.726964
BST1	-0.8202	3507	0.714	-1.3	4523	0.93	0.8399	1598	0.295	-0.8029	3464	0.6967	-0.6903	2957	0.5854	0.6962	2414	0.4929	0.7674	1662	0.32	1.31	487	0.0917	-0.5451	1775	0.3223	0.185089	-0.288703	0.350315	-1.26546	-0.761855	-0.351305	0.268386	-0.961446
BST2	-0.6184	3081	0.614	-0.5888	3113	0.628	-0.684	2740	0.541	1.1	1059	0.2025	1.47	175	0.035	0.9453	1653	0.3188	1.21	650	0.115	1.22	702	0.1332	-0.794	2443	0.4716	0.604178	-0.03755	0.566036	1.3071	-0.132106	1.56363	-0.065972	1.4205
BTC	-1.02	3962	0.822	-0.822	3601	0.737	-0.8965	3330	0.67	-1.17	4356	0.8739	-0.8559	3395	0.6923	-1.3	4616	0.9168	-0.8154	3006	0.609	-1.17	4312	0.87	0.5755	1598	0.315	-0.565752	0.749291	1.11824	1.18771	1.11528	0.674567	1.19914	0.837894
BTD	-1.58	4843	0.984	1.11	1204	0.21	-1.39	4699	0.947	0.9103	1742	0.3428	-1.49	4891	0.9723	1.09	1165	0.2228	-1.38	4751	0.947	-0.6876	3143	0.6339	-1.19	4155	0.8368	0.137537	-0.008222	0.322515	-0.451505	0.606969	1.0222	-0.025379	-0.297967
BTG1	-0.703	3240	0.65	0.9926	1626	0.297	-1.31	4504	0.911	-0.8818	3676	0.7424	0.9451	1413	0.2696	1.24	648	0.1264	1.03	1043	0.184	-1.57	4947	0.9826	-0.652	1966	0.3702	0.632211	0.764888	0.484991	1.6419	0.971946	0.973608	1.49579	1.03638
BTG2	-0.5114	2938	0.588	-0.5835	3109	0.627	0.8974	1460	0.261	-0.9429	3846	0.7775	-1.04	3934	0.7951	1.19	794	0.1549	-1.45	4850	0.966	0.7084	2346	0.4674	-0.6746	2027	0.3854	-1.48044	-0.29088	-1.20199	-0.636348	-0.125386	-1.19322	-0.96452	-1.06823
BTG3	-1.87	5017	0.999	1.08	1328	0.235	-1.21	4233	0.866	-1.17	4346	0.8756	0.6168	2334	0.4617	0.647	2562	0.521	-0.9184	3356	0.67	0.7279	2290	0.4554	-1.07	3660	0.7251	-0.918336	-0.585108	-0.006724	-0.010842	0.171723	-0.426333	0.314431	0.468019
BTK	1.48	206	0.025	1.51	161	0.018	0.7746	1787	0.33	-0.9062	3745	0.7607	-1.06	3975	0.798	-1.05	4164	0.8329	-1.23	4395	0.881	0.9806	1520	0.288	1.22	416	0.0738	1.18783	1.22426	0.802959	1.39805	1.02971	1.21922	0.412876	1.53179
BTLA	1.06	1393	0.239	1.34	467	0.071	-0.6348	2621	0.513	0.5771	2690	0.5414	1.36	360	0.0653	0.7291	2324	0.4764	-0.7438	2792	0.564	1.21	740	0.1353	-1.11	3802	0.7648	-0.972601	-2.06798	-0.92781	-0.333229	-1.33132	-0.243469	-1.24394	-0.583717
BTRC	0.6239	2669	0.52	0.5761	2902	0.565	0.6631	2062	0.39	-1.04	4078	0.8238	-1.35	4652	0.932	0.9498	1638	0.3247	-1.1	3978	0.795	-1.38	4721	0.9415	-1	3314	0.6725	0.769749	0.924969	-0.583918	1.36704	0.99891	0.712978	0.572542	0.287878
BUB1	0.5672	2775	0.542	-1.41	4657	0.952	1.25	629	0.102	1.14	948	0.183	0.4659	2532	0.5095	1.22	703	0.137	-0.653	2545	0.512	1.42	251	0.0457	-0.8795	2793	0.5602	1.12212	0.624549	-0.289181	-0.139619	-0.034319	0.311084	-0.603398	1.26119
BUB1B	-0.8704	3615	0.737	-0.8442	3656	0.739	0.6233	2155	0.408	1.53	81	0.0137	-1.28	4510	0.9065	1.34	375	0.0677	-1.08	3927	0.784	-1.37	4697	0.9374	-0.7974	2456	0.4882	0.691062	0.360336	-2.38875	-0.40765	-0.196689	-0.669886	-0.798899	-0.772809
BUB3	-1.43	4631	0.956	0.823	2221	0.421	-1.36	4618	0.934	0.6297	2589	0.5205	1.52	114	0.019	1.06	1270	0.2441	-0.8095	2986	0.605	1.17	895	0.1641	-1.27	4433	0.8882	-0.563291	-1.92666	-0.546291	-0.262516	-0.083971	0.298353	0.075326	-0.345775
BYSL	-1.39	4563	0.944	1.31	546	0.086	-1.4	4726	0.952	-1.44	4798	0.9558	1.26	572	0.1043	-1.38	4741	0.9408	1.22	639	0.121	-1.07	4092	0.8157	1.58	108	0.0192	0.547762	0.176527	-0.344979	1.15827	-0.431083	-0.7794	0.045707	-0.492584
BZW1	-1.64	4901	0.992	-1.35	4585	0.938	0.8747	1522	0.276	-1.27	4545	0.9032	-0.9048	3532	0.7109	-1.4	4759	0.9456	0.5568	2120	0.443	-1.03	4022	0.7994	1.54	143	0.025	0.752073	1.09745	1.18803	1.26155	0.602401	0.505806	0.735997	-0.012108
C10ORF110	0.9987	1611	0.28	1.2	880	0.141	-1.4	4713	0.949	1.19	790	0.1478	0.938	1436	0.2737	1.67	12	0.0036	-1.16	4179	0.836	0.7829	2136	0.4206	-1.58	5016	0.9907	-0.031731	-1.07486	-1.00868	-0.77953	0.320122	0.551286	0.153816	1.00652
C13ORF15	-1.55	4797	0.979	-1.55	4824	0.977	-0.6584	2673	0.523	0.7973	2118	0.4191	0.9599	1375	0.2715	-1.16	4368	0.8739	-0.3946	2240	0.451	0.8511	1920	0.3709	-0.5459	1777	0.3499	-0.456974	-0.339889	-0.495933	1.32311	-0.255623	-0.336393	-0.276733	-0.414499
C15ORF15	-1.43	4633	0.957	1.37	391	0.061	-1.57	4936	0.985	-0.6761	3164	0.6306	-0.9828	3745	0.7602	-1.3	4606	0.9207	-0.8482	3108	0.619	-1.38	4720	0.943	-0.7445	2270	0.4319	-2.82506	-2.20358	-2.56009	-0.773989	-1.2827	-1.39837	-1.71814	-2.60629
C19ORF40	-1.04	4000	0.83	1.1	1231	0.215	-1.37	4661	0.936	-1.5	4868	0.9681	-0.8441	3368	0.6759	-1.52	4888	0.9735	-1.17	4212	0.841	0.5279	2704	0.5441	1.38	250	0.0395	0.991567	0.23489	0.406713	0.675882	0.890038	-0.464725	-0.864762	0.399848
C1GALT1	0.5599	2790	0.557	0.8744	2052	0.39	-1.3	4464	0.906	0.5266	2762	0.5551	0.7212	2100	0.4142	1.03	1385	0.266	0.7695	1658	0.331	1.16	908	0.1668	-0.5894	1854	0.365	1.43362	1.37681	0.819734	0.674534	1.04065	0.906086	0.739577	1.42397
C1GALT1C1	0.9097	1887	0.341	1.12	1167	0.202	-0.9329	3435	0.692	1	1426	0.2784	0.8044	1868	0.3657	0.6723	2487	0.5094	0.5622	2111	0.427	0.9288	1683	0.3208	0.6839	1435	0.2802	-0.665986	-1.6	-1.49551	-0.96989	-1.27318	-0.743562	-1.53824	-1.41615
C1ORF103	0.8393	2103	0.387	-1.12	4237	0.87	1.32	484	0.076	-0.5847	2992	0.598	-0.6918	2961	0.5965	1.5	96	0.018	-1.12	4039	0.81	-0.6477	3062	0.6148	-1.12	3865	0.7793	0.825049	0.116763	-0.492915	-0.750091	0.299866	0.403142	0.047705	-0.081641
C1ORF142	0.7109	2479	0.486	0.8073	2269	0.444	-0.6586	2674	0.525	1.16	874	0.164	0.9171	1499	0.2863	0.5242	2785	0.5649	0.8433	1452	0.279	-1.43	4785	0.9534	1.09	561	0.1006	-0.227086	0.132969	0.098346	0.230607	-0.106536	-0.506714	0.109215	0.698231
C1QA	-0.7181	3288	0.657	0.9614	1721	0.319	-1.2	4217	0.862	1.01	1388	0.2728	1.11	990	0.1869	1.32	405	0.0738	0.9365	1228	0.238	0.752	2224	0.434	-0.5156	1744	0.3416	-0.336224	-1.25635	-1.22279	-0.861452	-1.42261	-0.757991	-0.696139	-0.265091
C1QB	0.8689	2013	0.367	-0.861	3695	0.75	0.9707	1274	0.223	0.4615	2824	0.5648	1.31	447	0.0837	1.37	316	0.0562	1.01	1085	0.207	1.42	247	0.0447	-0.8868	2825	0.5654	1.16976	-0.098507	0.049833	0.120939	-0.801143	1.355	-0.172926	0.736401
C1QBP	1.1	1257	0.21	1.23	788	0.134	-0.5701	2503	0.485	1.15	911	0.1738	0.5609	2438	0.481	-0.9705	3965	0.7995	-0.6912	2645	0.521	0.7161	2316	0.4626	-1.18	4107	0.8181	-1.03827	-1.48865	-0.304376	-0.836977	-1.179	-0.854512	-1.17569	0.462664
C1QC	1.52	168	0.019	-1.57	4853	0.981	1.74	36	0.003	-0.9721	3918	0.7931	0.7901	1901	0.3742	-1.03	4115	0.8234	-0.8695	3181	0.642	-1.12	4211	0.8497	-0.6753	2034	0.4044	0.289586	-0.369691	0.204531	0.84065	0.314098	0.699987	-0.17382	-0.317058
C1QL1	0.9107	1882	0.34	1	1592	0.292	0.5911	2212	0.423	1.07	1165	0.2293	-0.7478	3125	0.6281	0.685	2454	0.4973	-1.11	4022	0.815	-0.6288	3021	0.6027	-1.12	3863	0.7922	-0.490718	-1.00363	-0.38322	-0.205391	0.238051	0.399999	-0.88936	0.667569
C1QL2	1.03	1480	0.255	-0.8201	3595	0.726	0.87	1533	0.278	1.06	1214	0.241	-1.13	4130	0.8357	1.19	791	0.1539	-1.25	4433	0.887	1.22	699	0.1292	-1.05	3559	0.7168	0.097553	-0.745259	-0.020788	-0.929982	0.802937	0.09602	-0.424958	0.690563
C1QL3	-1.38	4553	0.943	-1.43	4678	0.957	-0.6674	2704	0.529	-1.41	4756	0.9485	1.54	95	0.0148	-1.62	4984	0.9866	0.6217	1992	0.405	-0.6112	2993	0.5991	1.61	93	0.0164	1.69107	0.848923	1.36422	1.71717	1.13903	0.189477	1.20224	1.06125
C1QL4	-0.6185	3082	0.605	-1.31	4530	0.926	0.8951	1467	0.264	-0.8975	3723	0.7552	0.8193	1823	0.3554	0.6231	2614	0.5334	-1.44	4828	0.965	1.33	425	0.0818	-1.05	3542	0.7144	0.209039	-0.983633	0.538762	-0.471966	0.814928	1.04105	-0.636397	-0.418032
C1R	-0.8211	3509	0.708	-1.26	4472	0.916	0.5603	2264	0.433	0.4765	2814	0.5634	-1.07	4000	0.8034	1.14	975	0.1904	-1.38	4735	0.945	-1.21	4383	0.8822	-1.32	4601	0.9188	-0.410393	-0.165575	0.67733	1.26733	0.939086	1.23119	0.089572	0.61743
C1RL	1.34	520	0.076	0.776	2371	0.469	1.24	659	0.105	-0.8148	3503	0.7033	1.1	1009	0.183	-0.7509	3381	0.6819	-0.8294	3055	0.609	-0.7236	3242	0.6506	-0.6181	1899	0.3518	-0.202804	-0.562509	-0.560868	0.268402	0.024124	-0.556978	-0.737729	0.449736
C1S	0.9993	1608	0.28	0.5646	2918	0.569	1.17	780	0.135	0.8546	1919	0.3798	0.9235	1481	0.2932	1.15	942	0.1831	-1.18	4226	0.85	0.7987	2080	0.4058	-1.34	4669	0.9305	-0.045648	-0.241315	0.462245	0.406142	0.70965	1.17358	1.35201	0.84995
C2	-0.6145	3071	0.613	0.9121	1905	0.359	-0.8307	3131	0.626	1.12	990	0.191	-0.723	3042	0.6014	1.03	1366	0.2539	0.9536	1186	0.221	1.29	525	0.0987	-0.4411	1679	0.3019	0.303852	-0.152899	-0.300501	0.081083	-0.269318	0.56426	0.485932	0.760552
C22ORF28	-1.34	4502	0.932	-0.9721	3956	0.808	-0.7587	2936	0.58	-1.06	4119	0.8312	0.6183	2329	0.4685	0.6335	2600	0.5276	-0.6217	2474	0.498	-0.8593	3596	0.7235	-0.7207	2185	0.4318	-0.050148	0.043437	0.156834	0.67794	-0.166109	-0.624188	0.189332	0.752325
C3	-0.7627	3375	0.681	1.05	1431	0.256	-1.55	4921	0.982	-0.9896	3962	0.8006	0.7851	1914	0.3681	-0.6743	3206	0.6452	-1.33	4651	0.923	-1.19	4348	0.885	-1.12	3843	0.7679	-1.70985	-1.38575	-1.2271	0.558196	0.888138	-0.301638	-0.356353	-0.186519
C3AR1	-0.9984	3908	0.805	0.7492	2471	0.472	-1.09	3903	0.788	-0.7863	3422	0.6942	1.24	628	0.1204	-1.65	5001	0.9904	0.9414	1214	0.236	1.24	662	0.1223	1.46	193	0.0328	1.43884	0.941855	1.19057	1.31909	0.219886	0.028324	0.276455	0.699028
C4A	-1.08	4070	0.84	-0.8283	3615	0.731	0.8188	1660	0.305	-0.8852	3684	0.7432	-1.11	4073	0.8219	-0.9172	3831	0.7649	-1.09	3940	0.796	-1.11	4181	0.8333	-1.24	4354	0.8824	0.302918	0.478622	0.67241	0.596955	1.46022	1.33916	1.35385	1.36013
C4B	1.08	1328	0.225	1.1	1232	0.214	0.7344	1896	0.354	1.09	1099	0.2179	-1.26	4442	0.8966	1.12	1051	0.2014	-1.41	4793	0.966	-0.5789	2944	0.5844	-1.49	4932	0.982	-0.926536	-0.249367	-0.513892	-0.922352	0.183796	-0.042701	0.21663	-0.039382
C4BPA	0.9928	1633	0.284	0.8584	2105	0.397	1.12	904	0.157	0.4764	2816	0.5635	-1.24	4391	0.8862	-1.27	4566	0.9081	-0.6838	2633	0.528	-0.5816	2949	0.5876	0.9471	831	0.1616	-0.106775	0.438766	1.16557	0.215745	0.67006	-0.164729	-0.494779	0.245154
C4BPB	-1.46	4682	0.962	-0.9537	3915	0.8	-0.8751	3260	0.653	-0.8275	3534	0.7169	-0.9189	3572	0.7274	1.23	671	0.1312	-0.9986	3626	0.727	-0.6933	3162	0.6372	-1.03	3467	0.7004	1.19096	1.05732	0.144883	1.03179	0.921118	0.731862	0.598439	0.670418
C5	-0.6087	3059	0.602	-1.26	4473	0.916	1.15	824	0.142	0.924	1692	0.3327	-1.2	4300	0.8698	1.38	303	0.0538	-1.37	4728	0.943	0.7344	2274	0.4447	-1.14	3948	0.7977	1.23378	1.39112	1.22345	-0.660978	1.22602	1.27496	1.18281	0.334591
C5AR1	-2.06	5041	1	-1.6	4888	0.986	-1.43	4765	0.96	-1.02	4041	0.8163	0.9172	1498	0.2977	1.11	1094	0.2099	-0.7092	2697	0.543	1.05	1294	0.2431	-0.6964	2097	0.4153	1.48814	0.722196	0.196027	0.736929	0.867741	0.422203	0.879572	1.05188
C6	-1.33	4480	0.931	0.8246	2211	0.429	-1.31	4522	0.914	0.5078	2784	0.5549	0.995	1282	0.2396	-0.5428	2955	0.5962	0.793	1589	0.305	0.7883	2109	0.4165	-1.23	4305	0.854	-0.041324	-0.519947	0.366743	0.180001	-0.416064	0.445568	-0.197214	0.829873
C7	1.08	1308	0.221	0.9573	1741	0.324	-0.9669	3533	0.714	-0.5481	2943	0.5865	-0.8298	3332	0.676	-1.01	4057	0.8145	-0.6281	2485	0.5	0.6081	2576	0.5106	1.02	676	0.1343	-0.030435	-0.413125	-0.72904	0.672858	-0.101246	-0.291928	-0.034901	0.218842
C7ORF16	-1.16	4210	0.875	-1.3	4529	0.931	0.8411	1596	0.294	1.36	328	0.0667	-1.03	3899	0.7892	0.7057	2387	0.4874	0.6966	1818	0.357	-1.41	4771	0.95	-0.5018	1731	0.3121	-0.954504	-0.225718	-1.41134	-0.530573	-0.69	-0.973464	-1.03052	-0.676688
C8A	-0.7356	3313	0.666	0.8245	2213	0.429	-0.8301	3130	0.625	0.9506	1607	0.3017	-0.9596	3691	0.7464	0.8088	2058	0.4165	-1.17	4197	0.838	-0.6887	3147	0.632	-1.14	3925	0.7831	-0.824539	-0.13435	-0.295421	0.621201	0.86588	0.163004	-0.282627	-0.187281
C8B	1.13	1155	0.191	0.8917	1990	0.371	0.9422	1347	0.239	-1.59	4953	0.9831	0.685	2192	0.4343	1.14	978	0.1905	-1.37	4730	0.944	-0.644	3054	0.6132	-1.34	4662	0.9301	-0.292549	-1.45565	-1.1184	-0.201866	-0.308626	-0.306833	-0.626866	-1.08849
C8G	-0.6968	3227	0.647	-1.01	4043	0.832	0.8332	1613	0.299	0.9949	1448	0.2719	0.5806	2404	0.4738	1.32	406	0.0826	1.17	718	0.128	-0.5677	2920	0.5825	-0.8558	2699	0.5248	1.35054	1.66768	0.19873	1.04168	0.24454	0.940499	0.630346	0.477048
C9	0.6292	2660	0.53	1.3	550	0.09	-1.04	3737	0.765	-1.53	4908	0.9747	0.7476	2018	0.392	-1.49	4860	0.968	-0.8675	3175	0.633	-1.34	4656	0.9337	0.9972	724	0.1328	-0.478614	-0.551626	0.173848	0.15704	-0.358859	-1.00253	0.199961	-1.61895
C9ORF95	-1.1	4108	0.853	-1.02	4069	0.837	-1.41	4740	0.95	-1.29	4573	0.911	-0.979	3740	0.7569	0.706	2384	0.4894	-1.09	3961	0.792	-1.44	4795	0.9572	-1.4	4805	0.9547	-0.450062	0.078385	0.36805	1.30719	1.28775	0.869715	1.74551	0.517236
C9ORF97	1.35	477	0.067	1.24	740	0.118	1.27	594	0.097	1	1425	0.2784	1.08	1059	0.2019	1.4	261	0.0447	-1.21	4331	0.87	1.22	734	0.1345	-1.37	4734	0.942	-0.739319	-1.4522	-0.876482	-1.3296	-0.919245	-0.375953	-0.239229	-0.415026
CA1	-0.7976	3459	0.701	-0.7804	3493	0.712	1.1	940	0.162	0.3764	2851	0.5659	1.12	974	0.1752	1.17	853	0.1654	-0.8225	3027	0.605	1.03	1370	0.2525	-1.31	4564	0.9033	-0.787856	-2.50209	-1.63903	-1.04953	-0.976206	-1.32788	-1.30672	-0.699653
CA12	0.9679	1709	0.301	1.09	1268	0.223	0.6413	2121	0.4	0.6389	2571	0.516	-1.11	4074	0.8257	0.658	2529	0.5157	-1.08	3917	0.782	-1.49	4844	0.9668	-0.9659	3170	0.6367	-1.19447	0.160301	-0.087746	0.097714	0.372685	0.018583	0.420997	0.604945
CA13	1.01	1580	0.275	-1.11	4224	0.867	1.23	684	0.114	0.83	2005	0.3974	-1.3	4550	0.914	-0.6487	3145	0.6363	-1.37	4731	0.944	-1.2	4364	0.8795	-1.11	3805	0.7652	0.032244	0.793233	0.776726	1.40228	1.28147	0.496265	0.640741	1.25203
CA14	0.9266	1828	0.325	0.9969	1610	0.292	0.742	1873	0.349	0.8172	2049	0.4011	0.9401	1426	0.2726	0.684	2456	0.5005	1.6	85	0.015	0.5859	2631	0.5244	0.7459	1295	0.2323	1.49894	1.00863	0.170465	1.44004	-0.344572	1.14632	0.82833	1.04002
CA2	-0.9844	3884	0.809	-0.8367	3638	0.746	0.809	1686	0.313	-1.75	5021	0.9954	1.59	60	0.0141	-1.85	5042	0.999	1.09	917	0.159	1.09	1153	0.2109	1.55	127	0.0184	1.0479	-1.16326	0.549811	1.61593	-0.49045	-0.599021	-0.022062	0.002039
CA3	1.11	1236	0.205	0.9513	1758	0.329	0.6579	2073	0.399	0.8286	2011	0.3934	-0.7643	3160	0.6251	0.8552	1941	0.3843	0.5851	2068	0.406	0.8625	1880	0.3636	-0.9002	2880	0.5648	0.891735	1.41174	1.11527	1.25442	0.856959	1.68433	0.99953	0.352238
CA4	-0.9283	3773	0.778	-1.46	4712	0.964	1.87	10	0	1.33	403	0.065	-1.22	4349	0.8783	1.3	453	0.0783	-1.22	4359	0.884	0.7351	2271	0.4442	-1.05	3541	0.7234	1.27598	1.25671	0.784348	0.40777	1.44511	1.19981	0.962301	1.11272
CA5A	1.45	261	0.035	1.56	95	0.013	0.8255	1635	0.304	1.08	1153	0.2193	-0.6554	2865	0.5685	1.37	319	0.0648	-1.07	3876	0.772	1.22	728	0.1363	-1.02	3404	0.6762	-0.794576	-1.41458	-1.62987	-2.09874	-1.3204	-1.1526	-1.41632	-1.29882
CA5B	0.5937	2724	0.533	0.6155	2828	0.551	0.9344	1360	0.244	0.8322	1996	0.4005	1.21	700	0.1325	0.718	2356	0.4811	0.9645	1162	0.236	1.11	1086	0.2004	-0.8211	2550	0.5252	-0.880594	-0.002763	0.395451	1.14624	0.049753	1.48853	0.896317	1.34838
CA6	0.6263	2665	0.518	0.9873	1642	0.303	-1.03	3733	0.754	-0.6594	3123	0.6266	-0.6595	2878	0.5841	0.9773	1563	0.3062	-1.25	4458	0.9	0.7844	2125	0.4137	-0.7011	2113	0.442	1.07174	0.504469	-0.219954	0.394848	0.621027	0.206605	0.360684	-0.466558
CA7	-0.84	3560	0.719	-0.7588	3445	0.693	-1.4	4716	0.949	-1.07	4139	0.8362	0.915	1506	0.2984	0.9986	1476	0.2898	0.6019	2041	0.413	0.7823	2140	0.4154	0.5432	1631	0.32	-0.748277	-1.25641	-1.20301	-1.06801	-0.829002	-0.775618	-0.505219	-1.24784
CA8	0.9272	1825	0.329	1.09	1287	0.226	-1.34	4591	0.928	1.17	849	0.1615	-1	3803	0.7682	1.1	1134	0.2171	-1.48	4883	0.975	-1.3	4575	0.9165	-1.22	4278	0.8607	-0.695667	-0.274949	-0.415807	-0.38221	0.09482	0.039438	0.091274	-0.335814
CA9	-1.18	4251	0.885	0.8531	2120	0.407	-1.04	3751	0.767	-1.08	4168	0.843	1.27	559	0.1072	-1.42	4779	0.9516	1.08	933	0.161	1.16	936	0.1719	-0.4567	1691	0.3035	-0.860439	-1.8118	0.095987	-0.186008	-1.05519	-0.396577	-0.313076	-0.389416
CAB39	0.6827	2559	0.489	-0.9842	3982	0.814	0.6238	2153	0.408	-1.23	4442	0.8931	-0.5373	2668	0.5332	0.9302	1710	0.3377	-1.02	3713	0.74	-1.65	4999	0.9904	-1.28	4481	0.8947	0.767491	0.26607	-0.245855	0.783415	0.639595	-0.591278	1.24643	0.555621
CABIN1	-0.6988	3231	0.648	-0.7422	3406	0.691	-0.7935	3022	0.604	1.04	1308	0.2447	1.12	948	0.1716	0.6338	2599	0.5258	0.9876	1118	0.203	1.43	240	0.0442	-1.32	4617	0.9135	-0.166053	0.041519	1.44271	1.03408	0.963077	1.64352	1.15446	0.921904
CACNA1A	0.8237	2154	0.406	0.6003	2857	0.567	-0.7903	3012	0.602	-0.7927	3439	0.697	0.7091	2128	0.4217	-0.9631	3945	0.7934	-0.6565	2553	0.514	-0.6189	3005	0.6018	0.5443	1629	0.3197	0.305294	0.33485	0.454622	1.0258	0.176229	0.782545	-0.011243	0.289658
CACNA1B	-0.5992	3043	0.608	1.2	914	0.155	-1.26	4373	0.889	-0.743	3306	0.6709	-1.14	4154	0.8399	1.11	1097	0.2104	-1.73	5037	0.999	-1.34	4650	0.9311	-1.1	3770	0.7583	-0.969475	-1.07232	-1.644	-0.887279	0.928311	-1.47524	-0.51368	-0.287901
CACNA1C	-1.19	4258	0.886	-1.93	5035	1	1.38	371	0.057	-1	3995	0.8024	-1.53	4932	0.9859	1.14	957	0.1841	-0.89	3260	0.658	-1.5	4876	0.9755	0.6348	1519	0.3235	-0.299067	-0.33266	-0.96855	0.266964	0.031831	-0.503708	0.168508	-0.066351
CACNA1D	-0.9976	3906	0.815	-0.6864	3282	0.664	-1.04	3752	0.767	-1.02	4043	0.8184	0.5816	2403	0.4735	0.8039	2081	0.42	-0.5108	2313	0.448	-0.8453	3552	0.7177	0.7634	1250	0.2249	0.079613	-0.432484	-0.809458	-0.698186	-0.77843	0.211644	-0.378201	-0.66359
CACNA1E	1.18	988	0.158	1.05	1439	0.258	1.37	395	0.06	0.8063	2085	0.4138	-1.35	4647	0.9317	1.17	864	0.1692	-0.781	2895	0.586	-1.14	4253	0.8579	-1.3	4548	0.9056	0.873737	0.928365	0.721954	0.823288	1.22423	1.70828	1.53956	0.222726
CACNA1F	1.22	847	0.13	0.6892	2633	0.512	1.37	390	0.059	-0.6463	3094	0.6224	-1.48	4888	0.9719	0.6307	2602	0.5291	-1.09	3963	0.792	-1.49	4859	0.969	-0.8341	2604	0.5181	-1.31868	0.175947	-0.171611	-0.119184	0.844591	-0.809556	0.892847	-0.456363
CACNA1G	1.06	1387	0.237	1.16	1020	0.176	0.4802	2334	0.449	-0.8265	3529	0.7165	0.6475	2272	0.454	-0.8859	3758	0.7567	-0.6902	2643	0.531	1.18	867	0.1588	-1.04	3520	0.709	0.650538	0.307134	1.02934	0.593671	0.933807	1.44616	0.357633	1.12544
CACNA1H	1.34	522	0.073	1.4	311	0.047	0.9235	1396	0.249	-0.8914	3701	0.7522	0.8851	1612	0.314	-0.8287	3603	0.7278	1.45	248	0.04	0.5696	2653	0.5279	0.8039	1161	0.2293	0.840199	0.837453	0.930593	1.06192	0.12784	-0.435222	0.992518	-0.027922
CACNA1I	0.734	2408	0.461	-1.2	4379	0.889	0.9122	1426	0.269	1.31	443	0.0725	-1.55	4953	0.9886	1.34	359	0.0603	-0.9572	3490	0.704	0.7982	2082	0.4042	-1.12	3856	0.7909	1.24976	1.40484	0.499432	0.888631	1.12342	1.25087	0.736006	1.56943
CACNA1S	-1.24	4327	0.907	-0.8258	3608	0.739	-1.02	3674	0.751	-1.02	4026	0.8164	1.17	814	0.1499	1.48	122	0.0298	-0.9326	3408	0.679	-0.6298	3023	0.605	-1.29	4518	0.8943	0.946066	0.217499	-1.22687	1.12798	0.305568	0.766329	1.24055	0.093945
CACNA2D1	-0.7095	3263	0.647	0.5979	2863	0.558	0.6122	2171	0.414	1.46	155	0.0201	-0.9231	3584	0.72	1.17	872	0.1629	1.42	285	0.047	-0.4564	2801	0.5544	-0.945	3076	0.6286	-0.090059	1.20342	0.663708	0.897713	-0.078327	1.18458	0.626012	0.882867
CACNA2D2	-0.6831	3210	0.635	1.23	789	0.125	-1.34	4576	0.925	1.12	1006	0.1964	-1.44	4824	0.964	1.01	1434	0.281	-1.23	4383	0.888	0.5172	2720	0.5362	-1.03	3442	0.707	-1.72285	-1.42649	-0.998135	-2.13106	-0.747806	-1.18317	-1.50787	-1.70206
CACNA2D3	-1.25	4335	0.904	-1.33	4561	0.932	-0.8754	3263	0.654	-0.5695	2976	0.5929	-0.6368	2824	0.57	-0.6821	3215	0.6503	-1.17	4207	0.845	0.7141	2323	0.4547	-0.8317	2592	0.5159	0.092875	-0.262973	0.852654	0.065731	0.855324	1.09203	0.035332	0.095679
CACNA2D4	0.7877	2246	0.422	-0.7332	3381	0.678	1.21	710	0.118	0.7745	2182	0.4337	1.36	367	0.0663	-1.43	4790	0.9538	1.45	254	0.041	-0.4891	2821	0.5658	-0.9423	3057	0.6156	-0.703042	0.085674	0.799572	1.26473	-0.050493	1.39749	0.825115	0.628135
CACYBP	0.5784	2758	0.538	-0.8018	3539	0.717	1.05	1055	0.186	-0.8772	3662	0.746	-0.8141	3291	0.665	-0.9462	3896	0.7866	0.6462	1938	0.394	1.02	1388	0.2621	1.79	25	0.0034	1.47292	1.03448	0.649001	1.15439	0.858979	1.82887	0.236454	0.481783
CAD	-1.4	4580	0.948	0.5503	2944	0.573	-1.13	4028	0.817	-0.6609	3128	0.6293	0.8323	1785	0.3479	-0.5042	2912	0.5898	-1.22	4354	0.874	0.6001	2600	0.5148	-1.33	4633	0.9261	-0.577166	-2.15757	-1.12804	0.035659	-0.094133	0.141014	-0.962409	-0.954038
CADM1	1.09	1298	0.218	0.7701	2399	0.461	1.18	766	0.141	-0.5886	2994	0.599	0.924	1479	0.293	-0.8035	3529	0.7127	0.6535	1922	0.391	1.11	1094	0.2048	0.8663	1015	0.199	-0.443309	-1.42849	-1.08248	-0.556634	-1.20526	-1.13806	-1.16888	-0.804599
CADM3	1.08	1343	0.226	1.12	1164	0.201	-0.9109	3375	0.678	0.9449	1631	0.3185	0.8969	1580	0.3071	-0.757	3394	0.6897	0.8042	1560	0.313	0.7148	2319	0.4542	-0.9512	3105	0.6236	-0.464147	0.025595	-0.249882	-0.068138	-0.181856	-0.036669	0.454573	0.668674
CALB1	0.7153	2467	0.484	0.9989	1601	0.291	-1.13	4023	0.82	0.9899	1466	0.2869	0.6765	2213	0.4401	1.02	1428	0.2765	-0.7048	2678	0.54	1.31	468	0.0862	-1.26	4407	0.8828	-0.266686	-0.282908	-0.566374	-1.10389	-0.729404	1.10997	-0.566225	0.552808
CALCA	1.29	639	0.091	0.7332	2510	0.483	0.72	1930	0.362	1.04	1303	0.2536	-0.7849	3211	0.6454	1.12	1047	0.2023	1.53	151	0.023	-0.9881	3920	0.7904	0.7276	1339	0.2643	0.393022	0.262501	-0.391069	0.713991	-0.07146	-0.280573	0.094817	-0.325172
CALCR	-1.54	4776	0.977	-1.59	4875	0.983	0.8697	1534	0.279	-0.6082	3025	0.6039	-0.9641	3700	0.7415	1.01	1429	0.2788	-1.11	4030	0.816	-0.8307	3510	0.7049	-1.04	3510	0.7171	0.772572	0.750434	0.309572	1.15482	1.63514	0.548305	0.802098	1.51835
CALCRL	-0.8845	3658	0.745	-0.6471	3205	0.637	-0.5909	2540	0.512	1.08	1138	0.2229	-1	3800	0.7629	-0.8824	3746	0.748	-1.09	3958	0.799	1.04	1326	0.2484	0.6892	1425	0.3019	-0.546437	-2.59375	-0.625018	-0.606265	-0.597685	-1.69452	-1.42382	0.941425
CALM1	0.6636	2587	0.5	1.25	723	0.116	-1.01	3669	0.741	-0.59	2996	0.5999	1.44	217	0.039	-1.29	4589	0.9127	1.34	407	0.072	1.03	1364	0.2568	1.54	141	0.0238	0.174609	-1.21834	-0.246259	0.246415	-1.47997	-0.118469	-0.658077	-1.15063
CALM2	1	1594	0.273	1.63	48	0.006	-1.56	4929	0.984	0.9519	1600	0.3009	-1.38	4707	0.9412	-1.08	4216	0.8455	-0.6752	2601	0.513	-0.9209	3764	0.7589	0.8821	978	0.1742	-1.67172	-1.56066	-2.23206	-1.59884	-1.66978	-1.73477	-2.92399	-1.68711
CALM3	0.9559	1746	0.31	0.7034	2601	0.502	0.9865	1227	0.216	0.8591	1900	0.3758	0.6634	2240	0.446	-1.2	4433	0.8851	1.13	821	0.15	-0.6767	3117	0.6289	0.6964	1414	0.2759	-0.346921	-0.84203	-0.514739	-0.736058	-0.270594	0.364558	-0.574739	0.044786
CALML3	1.29	642	0.092	1.31	534	0.085	-0.8713	3255	0.651	0.6524	2543	0.5096	1.06	1127	0.2153	-1.04	4134	0.8281	-0.7517	2820	0.569	0.8777	1847	0.3529	-0.7628	2331	0.4622	0.124324	-0.460359	-0.786349	-0.40561	-0.734793	-0.766393	-0.440634	-0.269342
CALML5	-1.78	4986	0.998	-0.9805	3973	0.811	-0.6456	2642	0.517	0.6626	2522	0.5038	1.46	196	0.0355	-0.8333	3618	0.7306	0.8868	1347	0.265	1.39	301	0.056	-1.19	4141	0.8335	1.62702	1.06619	1.4003	1.41231	0.536033	1.77874	0.775517	1.5058
CALML6	0.8856	1958	0.356	0.941	1792	0.335	-1.06	3813	0.771	-1.32	4644	0.9218	0.9536	1394	0.2754	0.5502	2755	0.5581	1.12	862	0.156	0.9469	1628	0.3094	1.41	226	0.0393	1.8301	-0.53347	-0.485656	0.319738	-0.316177	-0.982251	-0.313671	-0.867806
CALR	-1.18	4252	0.885	-1.59	4869	0.984	0.75	1854	0.345	-0.7579	3348	0.6716	-1.41	4764	0.9479	0.9057	1784	0.3487	-1.29	4553	0.903	-1.4	4762	0.9473	-0.8393	2625	0.5102	0.580168	1.16471	0.916676	1.06226	0.871846	0.19845	0.986209	1.41948
CAMK1	1.74	10	0.001	0.9508	1760	0.329	0.6737	2040	0.39	0.7169	2375	0.4666	-0.6452	2843	0.563	0.8935	1824	0.3572	-1.33	4655	0.923	-0.8777	3651	0.7352	-1.3	4556	0.9019	-1.79111	-1.51397	-1.20605	-1.39937	-0.484661	0.156332	-0.747298	-0.146946
CAMK1G	-1.11	4131	0.854	-0.7886	3512	0.708	-0.6848	2743	0.538	-0.5164	2907	0.5807	-1.31	4575	0.9188	1.3	461	0.0858	-1.75	5040	0.999	-1.09	4151	0.8395	0.8637	1021	0.2006	1.2221	1.03766	-0.285392	0.455553	0.814699	-0.07373	0.33598	0.065322
CAMK2A	0.957	1737	0.303	1.39	332	0.051	-1.18	4146	0.846	0.4886	2804	0.5581	-1.41	4783	0.9504	0.8822	1863	0.3662	-1.35	4691	0.93	-0.9731	3883	0.7855	-1.22	4254	0.8436	-0.589718	-1.12515	-0.895418	-0.320206	-0.120982	-0.340555	0.013444	0.021519
CAMK2B	1.06	1396	0.237	0.8136	2254	0.439	1.01	1158	0.205	-1.25	4486	0.9059	-0.845	3370	0.6764	-0.6221	3076	0.622	-1.26	4469	0.888	-1.09	4146	0.8422	-1.4	4796	0.9465	-0.205054	-1.19065	-0.31821	-0.37182	-0.062395	-0.393754	0.196165	-0.89423
CAMK2D	1.14	1110	0.184	0.7534	2451	0.485	-0.9031	3349	0.673	1.17	868	0.1636	-0.839	3358	0.6732	1.2	776	0.1511	0.9553	1179	0.22	-1.32	4613	0.9257	-0.6096	1882	0.3481	0.005827	0.16196	-1.23293	0.642191	0.098326	1.36008	0.354288	0.481269
CAMK2G	-0.7835	3420	0.694	0.7895	2323	0.459	-0.9589	3504	0.711	1.05	1236	0.2359	-0.6776	2921	0.5792	1.02	1400	0.2611	-1.31	4595	0.912	0.8459	1934	0.3744	-1.31	4578	0.9071	0.366062	0.293546	0.344639	-0.295008	0.292938	1.31602	0.184123	-0.277006
CAMK4	-0.6007	3045	0.608	1.29	603	0.103	-1.47	4837	0.967	-1.32	4641	0.9264	-1.26	4438	0.8972	-0.5833	2995	0.6075	-1.32	4624	0.918	-1.78	5037	0.9975	0.7243	1348	0.2416	0.043658	-0.729295	-0.815186	0.337724	0.026122	-0.614905	-0.432861	-0.59915
CAMKK1	-1.18	4249	0.883	-1.04	4088	0.838	0.7824	1764	0.325	-1.27	4551	0.9079	-0.5955	2756	0.5518	-1.1	4258	0.8511	0.9046	1300	0.254	-0.704	3184	0.6415	-0.8092	2497	0.4979	0.896732	0.149813	0.781559	0.854943	-0.066606	0.0761	0.152571	-0.181313
CAMKK2	1.21	901	0.145	-1.21	4392	0.905	1.77	24	0.002	1.26	568	0.1087	1.11	995	0.1793	1.05	1308	0.2442	-0.8808	3239	0.642	1.3	508	0.0954	-1.55	5003	0.9851	-1.59768	-1.03	0.501143	-0.805676	-0.694676	0.015239	-0.923184	0.296121
CAMP	0.5845	2743	0.536	0.7988	2302	0.438	-0.9347	3438	0.693	-0.6306	3066	0.6155	1.44	225	0.0411	0.8046	2078	0.4245	-0.9512	3463	0.699	0.6692	2438	0.4823	-0.7625	2329	0.462	-0.56186	-1.16419	-0.717166	-0.844146	-0.049995	0.069917	0.126812	-0.058205
CAND1	-0.6797	3201	0.639	-1.13	4263	0.878	-0.5743	2509	0.486	-0.7981	3455	0.6938	1.4	275	0.0562	-1.76	5035	0.997	-0.7875	2922	0.579	0.7747	2153	0.4258	-1.07	3638	0.7188	0.685854	-0.115499	0.510264	0.950601	0.267535	0.489114	0.956917	0.432673
CANT1	1.35	476	0.068	0.9988	1602	0.292	0.9937	1206	0.213	0.9621	1567	0.2932	-0.6879	2951	0.5843	1.19	810	0.157	-1.26	4482	0.891	-1.22	4414	0.8941	-1.26	4419	0.8766	-0.54114	-1.12451	-1.6441	-0.888276	-0.540724	-1.00651	-0.384995	-0.134081
CANX	0.8244	2152	0.397	0.9139	1899	0.355	0.5235	2308	0.441	0.7778	2168	0.4325	-0.9265	3597	0.7308	-1.26	4544	0.9035	1.68	44	0.004	-1.58	4953	0.984	0.8862	963	0.1892	-0.215957	0.243345	0.60611	0.875963	-0.720724	0.307785	1.56178	0.296973
CAP1	1.06	1394	0.237	1.35	447	0.07	-1.26	4376	0.89	-0.6381	3077	0.618	-0.893	3496	0.7135	1.27	537	0.1059	-1.42	4801	0.961	0.956	1596	0.3037	-0.5502	1787	0.3515	-0.153559	-0.98353	-1.33316	-1.35094	-1.11357	-2.49412	-1.31227	-0.748516
CAPN1	0.9825	1662	0.286	1.29	592	0.101	-1.32	4541	0.918	-0.6581	3117	0.6274	0.7501	2012	0.3964	-1.25	4514	0.8996	-1.04	3803	0.757	-0.914	3749	0.7542	0.9989	719	0.1423	-0.779214	-1.07153	-0.581847	0.843456	-0.548004	-0.810837	-0.780027	-0.376667
CAPN10	1.03	1486	0.256	0.9221	1860	0.348	0.9838	1237	0.218	-0.8818	3675	0.7413	1.26	573	0.1043	1.08	1211	0.23	0.9532	1187	0.241	1.4	268	0.041	-0.8461	2652	0.5456	1.11201	0.16428	0.147551	-0.170557	-0.081618	0.454845	0.730774	-0.55759
CAPN11	1.03	1502	0.259	1.18	967	0.162	-0.7427	2887	0.57	1.05	1231	0.2429	-0.9832	3747	0.7585	1.02	1403	0.2706	-0.9508	3460	0.699	-0.7199	3229	0.6509	-1.21	4236	0.8516	-0.73891	-0.493315	-0.31949	-0.869705	-0.585243	0.188248	-0.24945	-0.791716
CAPN2	1.49	201	0.026	1.39	350	0.053	-1.5	4866	0.972	0.6216	2605	0.5188	-1.24	4402	0.8904	-1.27	4564	0.913	-0.8811	3241	0.642	-0.9851	3913	0.7922	-0.5746	1822	0.3326	-2.02207	-1.45873	-0.845409	-0.87082	-1.15312	-1.45517	-1.41085	-2.12603
CAPN3	-1.09	4096	0.85	0.8035	2283	0.447	-0.9082	3365	0.676	0.5681	2704	0.5396	-1.28	4506	0.907	0.6652	2508	0.5117	-1.12	4061	0.813	0.6608	2465	0.4927	-0.9372	3037	0.5989	0.55002	1.19107	0.786513	0.583573	1.24697	0.637151	0.927337	0.783161
CAPN5	-0.5114	2937	0.577	-0.7608	3450	0.694	0.5871	2221	0.424	1.38	294	0.0522	-0.5639	2697	0.5401	1.33	386	0.069	0.6704	1881	0.383	0.7714	2160	0.4215	-0.6948	2092	0.4146	-1.40488	-1.64784	-2.23505	-1.91557	-2.11574	-2.46892	-1.61359	-0.83003
CAPN7	0.929	1819	0.328	0.6455	2759	0.534	0.7355	1894	0.353	-0.8343	3552	0.7216	-0.7629	3157	0.6333	-0.899	3786	0.7636	-1.26	4477	0.896	-1.34	4640	0.9292	-1.43	4851	0.9645	-0.454841	-0.388395	-0.093576	0.490984	0.84683	-0.319345	1.20391	1.25536
CAPN9	1.32	557	0.083	1.04	1462	0.262	0.7219	1925	0.363	1.25	600	0.1149	0.7382	2056	0.3964	0.7514	2259	0.4553	1.48	210	0.034	0.8168	2022	0.3957	-1.19	4145	0.8235	1.42464	1.26312	1.1045	1.36573	0.748266	1.61589	1.32955	1.46361
CAPNS1	1.7	24	0.002	1.4	327	0.049	-1.3	4496	0.91	0.7472	2274	0.4574	0.8516	1739	0.3442	-1.22	4467	0.8865	0.8734	1378	0.283	0.9987	1460	0.277	-0.6752	2032	0.4276	-0.752829	-0.932595	-0.787265	-0.444293	-1.20919	-0.103595	-0.18297	-1.23824
CAPNS2	0.9444	1770	0.314	0.9653	1707	0.316	-0.7444	2897	0.575	0.8394	1971	0.3848	-0.6584	2875	0.5697	1.06	1280	0.2395	1.48	218	0.035	-1.33	4637	0.9305	1.3	327	0.0525	-0.904733	-0.404621	-1.41665	-0.072815	-1.12015	-1.57722	0.209267	0.308137
CAPRIN2	0.9856	1655	0.289	1.48	202	0.024	-1.32	4527	0.916	1.24	642	0.1233	-1.09	4046	0.8176	1.26	577	0.1144	0.6982	1812	0.369	-1.04	4038	0.8127	-1.14	3921	0.7916	-0.091602	0.415768	-0.395708	0.660596	0.543625	1.10191	0.360048	0.025024
CARD10	-0.7363	3318	0.66	0.9754	1676	0.312	-0.8908	3313	0.664	-0.497	2887	0.5764	-1.44	4827	0.9607	1.31	439	0.0829	-1.38	4754	0.947	-1.19	4338	0.8744	0.846	1063	0.2097	1.29254	0.974098	0.398637	0.161113	1.36548	0.030939	0.307425	0.876531
CARD11	1.67	31	0.003	1.78	8	0	-0.8988	3337	0.67	0.7162	2378	0.4672	1.09	1022	0.1862	-0.9474	3899	0.7861	-0.7647	2852	0.564	-0.7891	3403	0.6869	-0.8389	2621	0.5099	-0.809483	-0.871834	-1.16253	0.099226	-1.28143	-0.26277	-0.307674	-0.728118
CARD14	0.9249	1839	0.327	0.5592	2929	0.582	0.8077	1691	0.314	1.14	954	0.1823	-0.8308	3335	0.6682	1.53	73	0.0202	0.5397	2143	0.419	1.1	1134	0.2079	0.7151	1368	0.2454	-0.264416	-1.03062	-1.71337	-1.18443	-1.35346	-1.33789	-2.09131	-2.12004
CARD6	-1.49	4717	0.971	-1.09	4191	0.864	-1.04	3760	0.768	1.05	1239	0.2441	-0.6306	2812	0.5671	-0.9829	3996	0.803	-0.7454	2797	0.565	-0.8534	3577	0.7211	-1.02	3409	0.6902	-0.284677	0.285101	-0.511064	0.237503	-0.328681	0.969818	-0.168338	-0.076878
CARD9	0.877	1986	0.362	1.34	464	0.07	-1.27	4390	0.893	0.7036	2409	0.4815	1.27	540	0.1017	-1.22	4469	0.8908	1.17	727	0.135	-0.6241	3012	0.6051	-0.6861	2066	0.4092	-1.0048	-0.718034	-1.37595	1.32424	-0.987303	-0.186085	-1.44035	0.159229
CARM1	1.33	537	0.075	1.32	520	0.081	0.7924	1738	0.319	1.08	1141	0.2223	0.8148	1840	0.3578	0.8758	1889	0.3743	-0.6569	2555	0.514	1.56	78	0.0107	-0.7745	2380	0.4707	-1.53099	-2.7533	0.073919	-2.27151	-1.63462	-0.52892	-2.73741	-1.08545
CARS	-1.04	4009	0.821	-1.6	4885	0.986	1.38	368	0.054	1.15	897	0.1736	-0.7036	2992	0.6036	0.9189	1745	0.3468	0.9649	1161	0.224	-0.7857	3395	0.6837	-0.6747	2028	0.4041	-1.00286	-1.45109	-1.74067	-0.691481	-1.69986	-0.30647	-0.951578	-2.30554
CARS2	-0.7823	3416	0.693	1.15	1068	0.188	-1.36	4627	0.932	1.41	234	0.0486	-0.7887	3220	0.6421	1.39	282	0.0567	0.9196	1270	0.239	0.7786	2147	0.4234	-1.05	3556	0.7038	-0.113126	-0.621178	-0.304377	-0.488765	-0.785744	-0.816122	-0.973713	-0.837294
CARTPT	0.9665	1712	0.302	0.9178	1886	0.352	-0.7291	2858	0.561	-0.9063	3746	0.7607	-0.7463	3117	0.6242	-0.8766	3730	0.7529	-1.34	4666	0.928	-1.27	4520	0.9066	1.09	562	0.1098	-0.844107	0.327034	-0.079062	-0.096337	-0.32151	-1.61436	-0.138041	0.53895
CASK	1.17	1021	0.168	1.06	1404	0.251	1.32	491	0.078	0.8654	1880	0.3659	-0.8321	3337	0.6692	1.35	342	0.0708	-0.6866	2639	0.519	0.9795	1525	0.2795	-0.732	2222	0.4241	-0.042873	-0.522622	-0.494109	-0.698863	0.20365	-0.490519	-0.653065	-0.214692
CASP1	1.05	1431	0.247	-0.9135	3819	0.779	1.42	312	0.044	0.4389	2838	0.5675	-1.3	4542	0.9125	1.48	116	0.0209	-0.9836	3584	0.719	-0.6029	2981	0.5955	0.8001	1169	0.2324	0.596493	-0.195662	-1.03305	-1.01828	-0.765637	-0.812892	-0.882862	-0.522522
CASP10	-1.14	4189	0.867	-0.7118	3336	0.669	-0.824	3113	0.621	1.09	1097	0.2175	1.17	797	0.1523	1.08	1197	0.229	1.04	1022	0.2	1.18	842	0.1498	0.7793	1215	0.2631	0.160094	-0.20314	0.543814	-0.57587	-0.226343	0.584315	-0.602343	0.437248
CASP12	0.7992	2210	0.415	0.8982	1959	0.366	0.976	1256	0.221	0.9738	1520	0.299	-1.01	3833	0.7743	0.988	1523	0.297	-0.8278	3052	0.616	1.3	500	0.0912	-1.24	4325	0.8682	-1.67154	-1.99433	-1.14562	-2.25227	-1.44351	-0.69787	-1.95655	-0.83812
CASP2	-1.41	4591	0.95	-1.11	4229	0.867	-0.9966	3618	0.732	-1.12	4243	0.8503	-1.23	4371	0.8837	-0.9728	3972	0.7908	-1.14	4107	0.829	0.7585	2204	0.4314	1.57	114	0.0202	1.52102	1.13634	1.21938	1.22798	1.49336	1.06681	0.170258	0.846966
CASP3	0.9327	1811	0.325	1.5	175	0.02	-1.27	4416	0.896	-0.604	3014	0.6048	-0.7396	3093	0.6203	0.7727	2201	0.4445	-0.8772	3221	0.647	0.8896	1814	0.346	-0.7696	2359	0.4674	-0.232127	-0.354989	-0.011094	-0.273275	0.377658	0.061164	0.10853	-0.293506
CASP4	1.49	195	0.022	1.53	142	0.015	1.37	405	0.061	1.52	92	0.0148	-1.15	4184	0.8468	0.9683	1591	0.3112	0.8479	1437	0.288	-0.6572	3078	0.6191	0.7406	1312	0.2583	-1.05971	0.282476	-1.01405	-0.848339	-1.371	-1.11261	-1.11001	-0.458447
CASP6	0.7042	2501	0.477	0.8092	2266	0.439	-0.6791	2728	0.554	1.06	1215	0.24	0.6579	2253	0.4496	0.6382	2585	0.5185	0.9612	1167	0.237	0.5451	2683	0.5286	0.5833	1591	0.3403	-1.08325	-0.383626	-0.979669	-0.222834	-1.2414	0.441005	-1.1112	-1.30676
CASP7	1.28	681	0.1	1.44	250	0.035	0.3934	2359	0.453	1.05	1253	0.2469	1.39	302	0.0497	1.09	1168	0.224	1.28	527	0.099	-1.32	4614	0.922	-0.8458	2651	0.5455	-1.31939	-1.84495	-1.87187	-2.11908	-1.52201	-1.52127	-1.01331	-1.17314
CASP8	-1.38	4549	0.943	-1.67	4943	0.993	1.2	726	0.124	-1.4	4735	0.9456	0.8587	1712	0.3305	0.8287	2007	0.407	-1.13	4096	0.824	-0.6785	3119	0.63	-0.4487	1685	0.3309	1.54277	0.929298	0.888985	1.36956	1.24227	0.618455	1.35206	1.51824
CASP8AP2	-0.831	3537	0.713	-1.52	4789	0.973	1.06	1037	0.183	-0.8155	3506	0.705	0.6138	2343	0.4697	-1.34	4671	0.9267	0.6922	1833	0.385	-0.9966	3941	0.785	0.9027	929	0.1972	-0.596594	0.239416	1.00914	1.07733	-0.090745	-0.605706	1.1405	1.32095
CASP9	1.53	144	0.018	1.55	109	0.015	0.5288	2304	0.442	-0.992	3969	0.8017	1.61	52	0.0067	-1.59	4955	0.9831	1.57	104	0.016	1.35	383	0.0718	1.33	297	0.052	-0.696829	-0.547481	0.019731	0.185579	-1.4253	-0.204671	-0.748037	-1.31033
CASR	-1.56	4814	0.981	-1.64	4920	0.991	1.05	1067	0.189	0.6185	2611	0.525	1.06	1124	0.214	0.6168	2624	0.5357	0.975	1139	0.22	0.5915	2619	0.5192	0.694	1419	0.2773	0.950963	0.628265	0.272181	0.988481	0.559728	0.983234	0.605502	1.13655
CAST	-1.48	4702	0.968	-1.29	4511	0.929	-0.6452	2641	0.518	0.6771	2478	0.4972	0.9287	1463	0.2903	0.7788	2182	0.4406	0.88	1363	0.27	0.6572	2469	0.4876	1.08	585	0.1136	-0.391182	-0.530855	-0.611871	0.342356	-0.940113	-1.88931	-1.33062	0.255954
CAT	-1.09	4100	0.846	1.11	1207	0.211	-0.9167	3393	0.681	0.9726	1525	0.2997	-0.7671	3171	0.6355	0.9764	1567	0.3041	-0.8628	3154	0.637	-1.02	4009	0.8062	-1.24	4341	0.8697	-0.320991	-0.729149	-0.890149	-0.679104	-0.517146	-0.953141	0.087016	-1.61098
CAV1	0.64	2640	0.525	-1.14	4277	0.88	1.48	216	0.035	1.35	353	0.0718	-1.27	4486	0.9038	1.35	356	0.0742	-0.5679	2375	0.465	-0.7837	3389	0.6836	-1.01	3354	0.6682	-1.36007	-1.00133	-1.6967	-1.61689	-1.1094	-0.815856	-1.32787	-1.15609
CAV2	1.18	966	0.152	1.05	1415	0.254	-1.07	3836	0.775	-0.7414	3301	0.6663	-1.05	3962	0.7924	-1.47	4830	0.9646	0.5406	2141	0.448	-1.11	4178	0.8319	0.8561	1036	0.2201	0.617413	0.950142	1.04454	1.34892	1.07848	0.139792	1.15009	0.282754
CAV3	-1.27	4372	0.917	-1.55	4830	0.979	0.9024	1448	0.258	1.2	746	0.1407	-0.5701	2707	0.5347	1.24	636	0.1247	-0.8443	3102	0.617	0.6234	2544	0.5107	-1.43	4854	0.9586	-1.48483	-2.14691	-1.78392	-1.89958	-1.39881	-1.47813	-1.60587	0.27485
CBL	1.59	89	0.009	1.22	828	0.133	1.02	1135	0.203	1.19	774	0.1418	-1.19	4275	0.8623	0.5835	2709	0.539	0.9453	1205	0.244	0.8201	2010	0.3922	0.821	1110	0.2379	0.40888	1.25842	1.36649	0.56075	0.657739	1.62588	0.745586	0.976604
CBLB	-0.6563	3155	0.621	-1.24	4438	0.909	0.805	1700	0.313	-0.8637	3627	0.7317	-1.04	3925	0.787	-0.7235	3309	0.6664	-0.9904	3603	0.727	-1.16	4289	0.8533	-0.8076	2492	0.514	0.223288	0.352548	-0.243331	0.498599	0.530926	-1.42425	1.01937	0.162436
CBLC	0.7633	2324	0.45	-1.24	4431	0.913	1.38	381	0.059	1.32	433	0.0842	1.39	300	0.0602	0.6378	2588	0.5248	1.54	143	0.025	1.2	801	0.1462	-0.7483	2283	0.4341	1.04119	0.924042	1.20148	1.18533	0.162809	1.25072	0.992643	1.50513
CBR1	-0.9829	3877	0.795	-1.34	4576	0.931	1.11	909	0.169	-1.12	4247	0.8558	0.9429	1420	0.2821	-1.07	4192	0.8369	-0.9288	3397	0.684	-1.49	4847	0.9673	0.9058	923	0.1817	-0.046467	0.291338	0.623161	1.7339	0.825176	0.281426	0.798528	0.47203
CBR3	-0.9147	3736	0.762	-0.8309	3623	0.733	0.8877	1485	0.268	-0.8101	3486	0.7068	0.5089	2501	0.5025	-0.8315	3612	0.7297	-1.18	4238	0.852	1.35	388	0.0731	-0.9597	3144	0.6308	1.06827	0.478594	0.205212	-0.207202	0.012364	0.614439	-0.221114	0.038333
CBS	0.8261	2144	0.404	0.7768	2367	0.468	-1.08	3880	0.79	1.44	184	0.0395	-1.02	3857	0.7821	0.5745	2722	0.55	0.9093	1291	0.246	-0.7037	3182	0.6388	0.6393	1508	0.2737	-1.98716	-0.550897	-1.27672	-1.20862	-1.58919	-1.88646	-1.18581	-1.532
CBX2	0.9079	1892	0.342	1.1	1252	0.219	-0.8884	3299	0.663	-0.7648	3364	0.6833	-0.6028	2768	0.5544	0.9028	1795	0.3573	0.5227	2162	0.436	-1.68	5012	0.9935	-0.8907	2843	0.5691	0.195674	-1.13339	-1.27692	-0.371486	-1.31311	-0.212015	-0.753048	-1.64959
CBX3	-0.9989	3910	0.815	-1.3	4521	0.93	0.9906	1215	0.215	1.04	1278	0.2397	-0.7207	3035	0.6004	0.6984	2405	0.4914	-0.8175	3012	0.602	-0.6398	3046	0.6095	-0.9463	3080	0.6082	1.24224	1.20328	0.947595	0.621548	1.25425	0.877005	1.39068	1.50429
CBX4	-1.44	4643	0.958	-1.07	4156	0.852	-0.9219	3413	0.684	-1.15	4308	0.8661	-0.8538	3389	0.6911	-0.8161	3564	0.7197	-1.47	4878	0.974	-1.27	4510	0.9038	-0.5546	1795	0.3531	1.48239	1.61124	1.88857	1.27643	1.57853	1.21931	1.60041	1.37458
CBX5	1.05	1415	0.241	1.59	78	0.01	-1.07	3843	0.784	0.9777	1503	0.2827	-1.48	4881	0.9673	1.25	601	0.1175	-0.7726	2872	0.569	-1.22	4417	0.8944	-0.958	3134	0.6186	-1.13744	0.966242	0.069151	0.403452	1.57084	0.116809	1.3866	1.05364
CBX7	-1.63	4881	0.99	-1.47	4722	0.963	0.5925	2209	0.423	0.8846	1830	0.3653	0.5145	2494	0.5036	-1.2	4428	0.8794	0.5992	2044	0.427	-0.9394	3799	0.7583	0.9939	731	0.1569	1.17077	1.49105	1.33867	1.93806	1.36087	0.786654	1.46137	1.62974
CCBP2	-1.31	4454	0.923	0.7634	2418	0.462	-1.17	4139	0.842	-0.7048	3221	0.649	1.25	596	0.1141	-0.7824	3472	0.7021	1.06	970	0.181	1.36	348	0.0654	-0.5617	1811	0.3548	1.34802	0.702647	0.418031	1.00683	-0.100041	0.563018	-0.065893	1.1605
CCDC6	-0.7588	3365	0.672	0.6877	2640	0.513	-0.9877	3591	0.728	-1.22	4437	0.8928	1.14	913	0.1724	-1.59	4954	0.983	0.7915	1596	0.318	1.3	494	0.0899	1.45	199	0.0337	0.704619	0.354411	0.366364	0.227177	0.505881	-0.280938	-0.278016	0.385799
CCK	-1.43	4630	0.956	-1.2	4381	0.897	0.4948	2322	0.447	0.9969	1444	0.2826	-1.31	4568	0.9176	1.04	1343	0.257	-0.61	2453	0.492	-1.28	4543	0.9095	-0.8846	2813	0.5638	1.47548	1.65003	1.08883	1.59053	1.46853	1.42649	1.3297	1.19929
CCKAR	-0.9003	3699	0.754	-1.63	4914	0.99	1.45	275	0.036	1.14	938	0.179	0.9093	1533	0.3093	1.25	618	0.1109	0.4668	2212	0.461	1.31	476	0.0787	-1.28	4491	0.9092	1.32493	1.24644	0.745578	1.2084	1.24261	1.93355	1.18609	1.79702
CCKBR	-1.1	4112	0.849	-1.59	4864	0.983	1.18	771	0.133	1.01	1381	0.2723	1.28	529	0.0961	0.6715	2490	0.5037	1.28	522	0.098	1.14	1000	0.1826	-0.464	1698	0.3604	0.536009	0.415078	-0.115485	0.393294	-0.329201	0.314759	0.134321	1.01874
CCL1	1.21	875	0.141	0.9582	1737	0.322	0.8134	1676	0.311	1.36	331	0.0673	-1.13	4139	0.8376	1.41	236	0.051	1.05	995	0.175	1.21	743	0.1383	-1.5	4946	0.9756	-1.11023	-0.97273	-1.19897	-1.30602	-0.775117	-0.679202	-0.55289	0.793614
CCL11	0.9595	1731	0.302	1.11	1223	0.214	0.8047	1703	0.315	-0.5384	2931	0.5853	-1.3	4545	0.9129	0.6963	2413	0.4956	-0.936	3423	0.689	1.03	1349	0.2541	-0.6877	2073	0.4101	0.29107	-0.005498	-0.499237	0.061334	0.232691	-0.041572	-0.276102	-0.60165
CCL13	0.8413	2096	0.393	0.6479	2751	0.547	1.06	1025	0.18	1.46	167	0.0298	0.7845	1916	0.3774	1.41	226	0.0404	1.03	1044	0.197	1.34	394	0.0745	-1.29	4503	0.9001	-0.733949	-0.18221	-0.183146	-0.382594	-0.538656	0.997841	-0.468006	1.01192
CCL15	1.09	1281	0.216	0.9122	1904	0.356	-0.9732	3550	0.718	1.64	23	0.003	0.8358	1775	0.3458	0.7506	2262	0.4612	-0.8757	3209	0.645	1.58	65	0.0088	-1.52	4975	0.9864	-0.761286	-0.976928	-0.667041	-0.457735	-0.408736	0.653397	-0.6857	-0.645369
CCL16	-0.6817	3206	0.639	-1.05	4120	0.848	1.15	844	0.142	1.34	366	0.0647	0.8657	1677	0.3257	-0.839	3637	0.7343	1.41	304	0.053	1.17	893	0.1637	-0.863	2727	0.5431	0.41298	0.250294	0.652667	0.112014	0.671482	0.593155	-0.223918	0.816655
CCL17	0.8783	1983	0.365	0.8703	2066	0.393	-0.6756	2722	0.535	1.14	929	0.1788	-0.4362	2570	0.5093	1.85	1	-0.0001	-0.9355	3420	0.682	1.49	157	0.0262	-1.64	5036	0.996	0.532871	0.021942	-0.456078	-0.273443	0.521598	1.3104	-0.132483	0.148981
CCL18	1.34	501	0.074	-1.05	4103	0.846	1.57	126	0.019	0.7329	2327	0.4553	0.4689	2531	0.5026	1.19	813	0.1572	-0.9965	3619	0.725	0.7699	2164	0.4289	-1.09	3721	0.7364	0.719956	-0.15273	0.11031	0.759399	0.262259	-0.194858	0.351786	1.0812
CCL19	0.8027	2202	0.422	0.9188	1880	0.353	-0.9372	3445	0.695	1.15	907	0.1726	0.7524	2004	0.3887	1.11	1102	0.2082	1.32	453	0.08	0.6959	2372	0.4739	0.8342	1082	0.1944	0.054872	0.203477	-0.484724	0.179178	-0.611387	1.79964	0.334844	-0.071114
CCL2	-1.17	4235	0.872	1.08	1320	0.228	-1.26	4363	0.895	-1.23	4443	0.8932	0.7364	2061	0.4043	-0.7852	3482	0.7032	-1.45	4845	0.968	0.6623	2460	0.4857	-1.14	3930	0.7934	-0.33428	-0.944895	-0.544692	0.26804	1.04502	-1.0976	0.110494	0.245901
CCL20	1.19	944	0.156	0.6501	2744	0.546	1.45	269	0.041	1.04	1291	0.2415	0.9145	1511	0.2877	0.6058	2654	0.5385	0.6215	1994	0.392	1.54	99	0.0163	-0.7749	2383	0.456	-1.40277	-1.79315	-1.66471	-1.31258	-1.58141	-0.577209	-1.91337	-1.67864
CCL22	1.1	1274	0.212	-1.02	4070	0.837	1.22	690	0.109	1.43	200	0.0355	-0.823	3317	0.6712	1.18	838	0.1625	0.6881	1845	0.374	0.8837	1831	0.3488	-1	3307	0.6719	1.12918	1.3556	0.021506	0.268331	0.009466	1.97109	0.109144	1.46758
CCL28	-0.4391	2907	0.57	-1.52	4786	0.972	1.31	513	0.081	-1.66	4995	0.9907	1.15	862	0.1646	0.767	2218	0.4486	-1.14	4128	0.83	-0.6868	3140	0.6334	-1.11	3800	0.764	-0.347327	-1.14539	-0.702153	0.183477	-0.47349	-0.901495	-0.429599	-1.01994
CCL3	0.8926	1935	0.353	-0.71	3333	0.668	1.04	1079	0.193	1.1	1061	0.2073	-1.52	4924	0.9792	-0.8108	3551	0.7173	-1.06	3865	0.772	-0.7277	3248	0.6551	-1.18	4089	0.8226	-0.550284	-0.78177	-0.167593	-0.452495	-0.01943	0.051965	-0.79479	-0.046301
CCL3L1	1.41	356	0.048	1.11	1227	0.214	0.8906	1476	0.266	-1.67	4997	0.9914	-1.45	4845	0.9626	1.06	1288	0.247	-0.8803	3235	0.649	-1.19	4334	0.874	1.66	66	0.0116	1.1697	0.626342	0.247377	0.623289	0.851898	-0.717942	0.206074	-0.291949
CCL4	1.15	1070	0.177	1.09	1267	0.224	0.6091	2179	0.418	1.21	739	0.1398	1.13	929	0.1689	0.6894	2438	0.4963	1.17	737	0.13	1.1	1120	0.2055	-0.7866	2419	0.4652	1.10934	0.792648	0.033305	0.651092	0.374767	1.45116	0.559391	1.59507
CCL5	-0.8252	3519	0.717	1.03	1489	0.267	-1.25	4332	0.883	-0.7413	3300	0.6695	-1.13	4143	0.8383	1.05	1294	0.2487	0.8634	1403	0.28	-0.8958	3705	0.7448	-0.6417	1945	0.3872	0.451567	0.711195	0.780952	0.757144	0.768532	0.655176	0.890618	0.777138
CCL7	-1.17	4232	0.88	0.7746	2381	0.456	-1.38	4675	0.942	-1.44	4795	0.9553	1.06	1123	0.2029	-0.988	4007	0.8078	0.6127	2019	0.395	-1.26	4491	0.9066	1.26	372	0.0596	0.475638	0.795175	0.703246	0.70859	0.149441	0.231314	1.16568	-0.01554
CCNA1	-1.34	4495	0.934	-1.57	4854	0.981	1.03	1122	0.199	-1.42	4767	0.9505	1.01	1244	0.2422	-1.23	4495	0.8955	-0.4753	2279	0.457	0.8343	1963	0.3838	-0.8815	2800	0.5615	0.699223	0.097063	0.126955	1.34597	0.756154	-0.977615	0.380594	1.09156
CCNA2	-0.9083	3721	0.759	-1.59	4878	0.984	1.43	304	0.042	-1.15	4303	0.8652	-1.45	4844	0.9624	0.7505	2263	0.4613	-1.1	3993	0.8	-1.62	4979	0.9886	-0.8806	2796	0.561	-0.348262	-0.192673	0.145858	0.322426	1.31538	0.577763	1.49772	0.264253
CCNB1	0.973	1698	0.297	-0.7469	3417	0.686	1.39	360	0.055	-0.801	3461	0.7022	-0.6809	2928	0.5912	1.15	935	0.1812	0.6844	1852	0.376	0.9741	1539	0.2921	-1.29	4502	0.9001	1.46086	1.57524	1.07657	1.17715	1.30799	1.53411	1.3798	1.63124
CCNB2	0.8796	1980	0.364	1.14	1100	0.192	0.5186	2312	0.444	0.749	2269	0.4437	-0.9106	3551	0.7185	1.13	995	0.1912	-1.27	4488	0.892	1.12	1058	0.1931	-1.05	3555	0.7037	-0.534459	-2.02065	-1.77668	-2.14717	-1.2467	-0.325799	-1.8708	-0.823006
CCNB3	-1.63	4894	0.991	0.5108	2986	0.584	-1.47	4836	0.971	0.5365	2750	0.5451	-1.38	4711	0.9479	1.15	936	0.1771	-1.4	4774	0.96	-0.8287	3504	0.7035	-0.8037	2482	0.5111	-1.6869	-1.77152	-1.3192	-1.81078	-1.45107	-1.60564	-2.12291	-3.25035
CCNC	-0.7585	3363	0.672	-0.8035	3543	0.718	-0.8815	3282	0.658	1.19	805	0.1532	1.09	1027	0.1961	-0.8889	3767	0.758	-0.5912	2419	0.486	1.53	112	0.0164	-0.4665	1700	0.3332	-1.17291	-1.0912	0.31476	-0.839014	-0.775024	0.373084	-1.41571	-0.418651
CCND1	-1.58	4840	0.983	1.06	1395	0.249	-1.39	4694	0.946	-1.48	4854	0.9647	0.8307	1788	0.3489	-1.13	4319	0.8622	-1.21	4327	0.869	-0.6338	3031	0.6085	-1.26	4427	0.8861	-0.311196	0.56762	0.851635	1.40754	1.38289	1.72892	0.92463	1.20426
CCND2	0.8361	2111	0.397	-0.5364	3066	0.618	1.22	688	0.109	-1.77	5028	0.9968	1.27	555	0.1057	-1.49	4862	0.9683	-0.7739	2875	0.57	-0.827	3499	0.7083	1.62	89	0.0124	0.848381	-0.045899	0.282333	0.951614	0.178255	-0.57061	0.561297	-0.869774
CCND3	1.38	421	0.058	-1.76	4990	0.995	2.02	1	0	1.1	1054	0.2016	0.8937	1592	0.2999	1.2	771	0.1503	-0.8784	3225	0.64	1.19	825	0.1508	-1.27	4438	0.8803	0.21359	-2.59158	-2.0926	-0.676494	-1.00614	0.139841	-1.69464	-0.517144
CCNE1	-0.8211	3510	0.715	-1.24	4436	0.914	0.8657	1543	0.28	-0.6718	3151	0.6285	0.8562	1720	0.3212	-1.56	4927	0.9793	1.77	15	0.004	0.5941	2612	0.5217	1.62	88	0.0123	-0.292631	-0.113586	0.511413	0.003408	-0.60208	-0.019201	-0.014732	-0.658259
CCNE2	-1.32	4465	0.929	-1.27	4480	0.923	-0.7117	2810	0.554	-0.8002	3459	0.695	-0.8753	3443	0.6959	-0.6621	3178	0.6391	-1.36	4706	0.934	-1.38	4722	0.9417	-1.16	4042	0.8053	-0.920943	-1.2739	-0.878614	-0.537993	-0.159953	-1.16074	-1.65326	-1.11101
CCNG1	-0.8924	3675	0.749	-1.38	4628	0.945	1.12	880	0.154	-0.9268	3797	0.7731	-1.52	4917	0.9788	-0.7988	3515	0.7102	-1.22	4358	0.875	-1.51	4882	0.9728	0.5139	1651	0.3239	-1.19756	-1.35815	-1.23043	-0.904667	0.077312	-1.53977	-0.811372	-1.99742
CCNG2	0.791	2235	0.429	0.749	2472	0.488	-0.4962	2400	0.465	0.6674	2509	0.4973	-1.46	4854	0.9628	-0.693	3234	0.6524	0.8181	1532	0.292	-1.06	4079	0.8299	-0.7998	2465	0.477	-1.55764	0.112039	-0.235921	0.04317	-0.325277	-0.623046	-0.561194	0.064644
CCNH	-1.33	4486	0.932	-1.46	4707	0.963	1.14	858	0.146	1.22	698	0.1344	1.18	791	0.1535	1.45	160	0.0289	1.12	853	0.154	1.53	105	0.0157	-1.19	4158	0.8368	0.185835	-0.650253	-1.00719	-0.623602	-0.918162	0.932032	-0.570287	-0.544996
CCNI	-1.47	4694	0.966	-1.43	4682	0.958	0.9519	1317	0.235	-1.32	4646	0.927	0.9711	1343	0.2554	-0.6657	3188	0.6409	-0.8856	3251	0.645	-0.9974	3947	0.7978	0.6933	1420	0.2534	0.915993	0.415148	0.815996	0.761267	0.930316	0.504206	0.250008	0.048297
CCNK	0.731	2418	0.459	-1.22	4405	0.902	1.29	534	0.087	1.42	223	0.0379	-1.11	4082	0.8267	1.16	887	0.1725	-0.8613	3152	0.637	0.6766	2412	0.4772	-1.24	4356	0.8711	-1.2117	-1.31903	-2.1079	-0.561048	-1.08661	-0.669947	-1.88514	-2.04201
CCNT2	1.21	898	0.145	0.9813	1663	0.304	0.8198	1656	0.307	0.8875	1820	0.3502	0.9737	1336	0.2536	1.23	654	0.1277	-1.02	3706	0.737	-0.8367	3525	0.7136	-1.35	4692	0.927	-1.56418	-2.35752	-2.02352	-1.81054	-1.77109	-0.831807	-1.70233	-0.977453
CCR1	-1.12	4146	0.856	-0.9	3788	0.771	-1.1	3924	0.793	-1.22	4426	0.8909	0.6362	2301	0.4594	-0.9617	3940	0.7929	-1.12	4040	0.811	0.761	2192	0.4283	0.6264	1534	0.3012	0.646693	0.077999	0.862331	0.16989	0.942905	0.757606	0.447454	0.136566
CCR10	-1.32	4470	0.93	-1.7	4971	0.992	1.33	459	0.074	1.15	904	0.1741	1.26	579	0.1102	1.1	1137	0.2173	1.65	56	0.007	1.21	769	0.1394	0.7953	1184	0.234	1.36352	1.52607	0.193204	1.37054	0.09823	1.77467	1.41831	1.09761
CCR2	-1.09	4098	0.85	0.7495	2470	0.488	-1.1	3926	0.8	1.21	731	0.1391	1.23	642	0.1232	0.775	2193	0.4385	0.8875	1346	0.257	0.7751	2151	0.4256	-1.37	4737	0.9342	0.883344	1.26551	0.704952	1.45298	0.449613	1.9474	1.40036	1.79962
CCR3	-1.12	4153	0.862	1.24	759	0.13	-1.55	4927	0.982	-0.7142	3238	0.6485	-0.8099	3282	0.6546	-0.9055	3802	0.7643	-0.7383	2775	0.55	-0.7305	3255	0.6545	-0.5014	1729	0.312	-0.086618	-0.303788	0.346733	-0.18718	-0.157923	0.743163	0.516717	0.306807
CCR4	0.6007	2713	0.53	0.9463	1776	0.332	-0.521	2425	0.47	1.08	1133	0.2207	1.29	496	0.0922	0.6532	2547	0.5179	0.7399	1726	0.347	1.65	29	0.0036	-1.32	4594	0.9176	0.84882	0.323221	0.778389	0.728012	0.873388	1.85446	0.861641	1.42789
CCR5	-1.4	4578	0.947	-1.43	4677	0.956	-0.5595	2488	0.482	0.6438	2560	0.5128	-1.14	4168	0.8421	0.8837	1857	0.3691	-1.2	4283	0.859	-1.48	4839	0.9664	-1.25	4379	0.8767	0.946025	1.3095	0.50463	1.44273	1.33422	1.05768	1.62942	1.32911
CCR6	-0.7351	3312	0.66	-1.63	4913	0.989	1.5	196	0.025	-0.9387	3834	0.7778	-1.03	3889	0.7846	-1.1	4257	0.8502	-1.49	4912	0.978	-1	3959	0.7981	-0.8519	2682	0.5349	0.472549	0.133994	0.196429	0.376537	0.916462	-0.546194	-0.101704	0.787601
CCR7	0.7796	2275	0.437	-1.27	4488	0.925	1.4	340	0.054	-0.6474	3098	0.6152	0.911	1526	0.2896	1.01	1448	0.2714	-1.05	3836	0.763	-0.8532	3576	0.7215	-1.18	4119	0.8192	1.24407	1.13332	0.736163	1.20655	1.18209	1.517	1.17415	1.35381
CCR8	-0.9881	3893	0.81	-1.07	4141	0.854	0.5796	2230	0.429	-1.11	4230	0.8552	0.8558	1721	0.3218	1.3	454	0.0916	-0.4086	2246	0.437	-1.08	4132	0.8395	-1.24	4350	0.8607	0.232776	-0.621321	-0.728579	0.025048	-0.142174	0.267653	-0.064461	0.176731
CCS	0.7354	2400	0.456	-1.12	4249	0.871	1.28	568	0.092	-0.7537	3332	0.6769	-0.7397	3094	0.6206	-1.11	4267	0.8531	0.5581	2117	0.428	0.6954	2376	0.4668	0.6543	1482	0.2917	1.12214	0.470845	0.17589	1.26585	1.07743	0.611531	1.34906	1.1241
CD14	1.03	1503	0.259	-1.05	4117	0.844	1.08	972	0.17	1.12	991	0.1929	-0.9135	3564	0.7237	1.15	930	0.1805	-0.8786	3228	0.648	1.16	925	0.1707	-1.49	4935	0.98	0.237319	-0.453816	-0.735693	-0.444616	0.263861	-0.144803	-0.060239	0.527042
CD151	0.5204	2840	0.555	1.11	1195	0.209	-1.56	4933	0.987	1.26	582	0.1105	0.8165	1831	0.3568	1.09	1144	0.2186	0.7284	1748	0.353	-0.8377	3530	0.7123	-1.38	4758	0.9474	-1.11305	-1.26996	-1.55369	-0.194237	-0.490886	0.584987	-0.991328	0.142802
CD160	-1.24	4328	0.903	-1.39	4635	0.948	1.04	1071	0.19	-1.45	4814	0.9589	-1.52	4923	0.9792	0.6339	2597	0.5273	-1.29	4557	0.911	-1.01	3982	0.8024	-0.6886	2075	0.4106	0.964737	1.15851	0.643649	0.280811	1.03375	-0.112834	0.43248	0.030564
CD180	1.63	53	0.007	1.59	68	0.009	-0.8914	3315	0.667	1.38	281	0.0581	-1.07	3990	0.8066	0.5678	2734	0.5517	1.02	1069	0.189	1.04	1314	0.2415	0.4318	1666	0.3001	-1.83088	-1.28294	-0.583094	-1.47502	-2.09207	-1.0759	-1.74609	-1.39561
CD19	0.4575	2882	0.564	1.11	1216	0.211	0.7612	1824	0.339	1.15	915	0.1734	-1.22	4345	0.878	1.46	140	0.0201	-1.21	4325	0.877	-0.8442	3550	0.7124	-1.39	4783	0.9586	1.33073	0.900427	-1.09054	0.334054	0.860584	1.76244	0.47288	0.476888
CD1A	1.51	173	0.019	1.14	1078	0.186	-1.31	4508	0.912	-0.9991	3981	0.8052	-0.9716	3719	0.7541	-0.977	3982	0.7998	-1.03	3729	0.742	-0.8811	3660	0.7355	-0.6889	2076	0.4109	-0.682114	-1.01581	-1.01777	0.114887	-0.118492	-1.32505	-0.818104	-0.531048
CD1B	-1	3917	0.806	-0.7083	3329	0.667	0.7386	1882	0.352	-1.23	4447	0.8888	0.6363	2300	0.4589	-1.11	4281	0.8471	-1.24	4408	0.892	-0.9628	3854	0.7699	-0.8472	2656	0.5463	1.22438	0.786773	-0.131634	1.33977	0.795322	0.668057	0.726911	-0.11683
CD1C	1.33	547	0.076	1.09	1294	0.227	1.02	1127	0.201	1.27	546	0.0943	-0.9655	3702	0.743	1.2	775	0.1453	0.6506	1929	0.406	0.6285	2531	0.4985	-1.47	4913	0.9788	0.688926	0.525883	-0.317351	-0.028444	0.166531	0.728064	-0.241958	-0.05614
CD1D	-0.6435	3127	0.614	0.5746	2905	0.565	-0.5018	2404	0.466	1.24	625	0.1181	-1.37	4699	0.9398	1.12	1025	0.1997	-1.19	4254	0.854	-1.33	4626	0.9262	-1.5	4948	0.9816	-0.4889	1.11572	0.424568	0.831529	1.41816	0.23328	1.32303	0.469985
CD1E	-1.53	4754	0.976	-0.754	3435	0.69	-1.22	4270	0.878	-1.39	4733	0.9429	0.8593	1707	0.3396	-0.82	3577	0.7163	-1.29	4540	0.915	-1.36	4690	0.9374	0.7467	1294	0.2784	1.44193	1.1485	0.293139	1.45909	1.07225	0.832954	0.787118	0.804041
CD2	-1.02	3958	0.821	0.8974	1963	0.372	-1.51	4883	0.976	1.01	1391	0.26	-0.7211	3037	0.6006	0.8477	1956	0.3894	-0.6647	2573	0.508	0.7618	2188	0.4341	-1.33	4631	0.9169	-1.29534	-0.620609	-0.354488	0.14652	-0.554823	0.27713	0.347205	0.893479
CD200R1	1.19	941	0.148	-0.7385	3394	0.681	1.67	62	0.007	1.22	682	0.1248	1.16	828	0.1591	0.7025	2396	0.4888	1.65	58	0.005	1.23	688	0.123	-0.6413	1942	0.41	0.38346	0.482809	-0.225057	0.234443	-1.13406	0.687818	-0.343957	0.887912
CD207	1.19	949	0.15	1.15	1066	0.185	-0.7557	2928	0.579	1.01	1404	0.2764	-1.14	4171	0.84	1.28	511	0.0911	1.18	703	0.136	-1.26	4496	0.896	-0.9022	2892	0.5906	-0.588075	-0.136927	-0.4691	0.18262	-0.791374	-0.377365	0.700051	-0.815952
CD209	-1.17	4234	0.881	-1.38	4621	0.948	-0.9164	3392	0.682	-1.14	4293	0.867	0.9001	1563	0.2961	-1.55	4912	0.9768	0.9323	1235	0.233	-0.7315	3257	0.6553	1.47	180	0.0269	1.13897	0.757484	1.59499	1.35712	0.63557	1.46269	1.16638	0.439871
CD22	-0.5906	3027	0.606	0.7758	2372	0.469	-0.8112	3078	0.615	0.5654	2706	0.5405	1.12	955	0.1725	-1.56	4928	0.9794	0.661	1907	0.374	0.6083	2575	0.5169	-1.14	3913	0.7805	-0.639483	-1.00324	0.002179	0.771549	-0.185368	0.522425	0.243587	0.517755
CD226	-1.79	4988	0.997	0.6476	2753	0.547	-1.36	4623	0.932	-1.1	4212	0.8516	1.16	845	0.1546	-0.7179	3292	0.6637	0.7495	1707	0.329	1.09	1152	0.2108	0.7282	1337	0.2406	0.970969	0.652407	0.067315	0.906281	0.213226	0.686443	0.260709	0.127985
CD24	-0.5958	3037	0.601	-0.7021	3317	0.663	0.9166	1410	0.268	0.9722	1528	0.303	1.29	497	0.0886	0.7915	2128	0.4366	1.65	54	0.004	0.97	1555	0.2977	0.7636	1248	0.2713	1.27051	0.538628	-1.0193	0.561069	-0.988651	0.647839	0.533209	1.14806
CD244	0.8769	1987	0.362	0.9776	1670	0.31	-0.661	2689	0.525	1.05	1229	0.2427	-1.06	3977	0.7988	-0.8616	3691	0.7453	-1.33	4647	0.925	-1.26	4484	0.8994	-0.6903	2081	0.4118	-0.944236	-0.374546	-0.183172	-0.06003	-0.438085	-0.220991	-0.418304	0.700881
CD247	1.18	973	0.155	0.6181	2823	0.55	1.35	424	0.065	0.9362	1653	0.3242	-1.48	4882	0.9707	1.14	955	0.1862	-0.9966	3620	0.726	0.6456	2494	0.4929	-1.24	4326	0.8684	1.08836	0.401892	-0.884381	0.118345	0.24409	0.342336	-0.068048	-0.196523
CD27	-1.78	4982	0.998	-0.9976	4010	0.819	-1.05	3783	0.765	-0.9601	3889	0.788	-1.15	4203	0.8496	0.5171	2790	0.5662	-1.25	4427	0.886	-0.7387	3277	0.6607	-0.7954	2450	0.4864	1.41756	1.10689	1.23645	1.21051	1.28541	1.14534	0.260297	0.277499
CD274	-0.9217	3758	0.775	0.7279	2531	0.501	-0.5817	2521	0.489	-0.6218	3042	0.6052	-0.8186	3302	0.6598	0.8161	2043	0.4116	-0.4982	2303	0.446	-0.6799	3123	0.6273	-0.761	2326	0.445	0.138879	-0.456856	-0.627558	-0.259147	0.722486	-0.265581	0.041041	-0.102325
CD276	1.41	344	0.047	0.6899	2629	0.511	0.8885	1483	0.267	0.5807	2685	0.5407	1.3	493	0.0908	0.7441	2284	0.4662	0.6953	1827	0.37	1.29	528	0.0954	-0.9499	3092	0.6225	-0.1295	-0.136579	-0.013409	-0.270879	-0.472042	-0.039484	0.366433	0.211299
CD28	-0.9279	3769	0.778	1.02	1544	0.278	-1.14	4060	0.826	-0.9864	3951	0.7991	-1.1	4053	0.8208	-0.9719	3971	0.8002	-0.7007	2665	0.527	-0.4942	2825	0.5687	-0.5857	1844	0.3371	0.067243	0.175197	0.136402	0.729671	-0.201963	0.363505	-0.212652	-0.906856
CD2AP	1.36	469	0.066	1.41	296	0.045	-1.48	4856	0.974	0.8392	1974	0.3944	-0.6184	2792	0.5675	-0.6686	3195	0.6393	-0.8484	3109	0.631	1.18	858	0.154	-1.2	4187	0.8546	0.029231	-0.246614	0.746708	0.002559	0.236613	0.395478	-0.101576	0.759689
CD2BP2	1.11	1213	0.203	1.13	1131	0.197	-0.569	2501	0.484	0.936	1657	0.3134	-1.74	5036	0.9979	1.04	1341	0.249	-1.48	4894	0.973	-1.07	4097	0.8352	-1.32	4603	0.9117	-0.49261	-0.422283	-0.872633	-0.377078	0.327805	-0.614143	-0.15324	-0.248512
CD33	-0.6621	3167	0.624	-0.9097	3805	0.776	0.9341	1361	0.244	1.36	325	0.0573	1.31	458	0.0852	0.8035	2084	0.4251	1.5	186	0.029	1.32	428	0.0823	0.6887	1426	0.2789	0.282509	-0.128587	0.030145	0.444785	-0.742489	0.344659	-0.531608	1.0282
CD34	0.7402	2389	0.468	0.9381	1804	0.339	-0.6075	2565	0.499	0.7716	2189	0.4354	0.7469	2019	0.3993	1.19	809	0.1562	-0.8011	2962	0.6	1.38	310	0.0571	-1.01	3370	0.6847	1.3106	0.147409	-0.150315	-0.001749	0.380486	1.11315	0.374198	0.596453
CD36	1.05	1419	0.244	0.5361	2960	0.577	0.9139	1419	0.255	-1.14	4296	0.8634	0.4642	2535	0.5099	-1.03	4107	0.8222	1.08	938	0.173	-0.8655	3614	0.727	0.5648	1610	0.3172	-0.085756	-0.206998	-0.384269	0.190207	-0.583904	-0.331849	0.126825	0.392835
CD37	-0.6581	3160	0.63	0.9972	1605	0.292	-1.37	4665	0.936	1.23	663	0.1273	0.7547	1995	0.3936	1.6	32	0.0044	1.16	769	0.142	1.38	307	0.057	-0.9308	3014	0.6057	-1.92635	-1.63198	-1.42516	-1.36426	-1.4149	-0.932776	-1.26061	-1.12047
CD38	1.59	80	0.008	1.5	174	0.02	1.6	99	0.013	1.48	138	0.0253	0.5476	2451	0.4931	0.7687	2214	0.4477	1.61	80	0.012	1.37	340	0.0643	-0.8015	2476	0.4916	-1.46918	-1.177	-1.61873	-2.09207	-1.72852	-0.634052	-1.47222	-1.2025
CD3D	-0.6499	3140	0.618	-0.9845	3983	0.814	1.08	987	0.172	-1.1	4213	0.8505	0.7182	2108	0.4154	0.5706	2731	0.5526	-1.01	3657	0.731	-0.9416	3811	0.7666	-0.8572	2705	0.5385	-0.622977	-1.23867	-0.651468	-1.07096	-0.436397	-0.344543	-0.285571	-0.649973
CD3E	1.23	839	0.127	-0.9421	3890	0.793	1.46	252	0.033	-0.9521	3871	0.7835	-1.01	3829	0.7737	-0.5384	2949	0.5966	-0.8745	3204	0.645	1.55	90	0.0127	0.7794	1214	0.2405	0.249862	-1.50503	-0.00095	-1.26237	-0.637548	-0.265243	-0.395896	0.442839
CD3EAP	0.8262	2143	0.404	0.8665	2077	0.396	0.9465	1333	0.238	1.21	735	0.1392	-1.47	4876	0.9655	1.1	1119	0.2121	-0.701	2667	0.527	-1.16	4282	0.8705	-1.3	4544	0.8976	-1.0841	-0.263295	-0.574959	-0.540765	0.410438	0.917961	0.338594	-0.513175
CD3G	1.45	250	0.033	0.8785	2034	0.387	1.71	49	0.004	-0.8777	3666	0.7405	1.12	951	0.1719	-1.57	4942	0.981	0.8046	1559	0.3	-0.8213	3486	0.7051	0.9235	880	0.16	-0.001156	0.57268	0.36802	1.07938	0.130294	0.721971	-0.083903	0.139118
CD4	1.13	1159	0.191	0.9694	1696	0.317	1.32	485	0.076	1.12	984	0.1912	-1.56	4955	0.9842	0.8993	1813	0.359	-0.9333	3414	0.688	-1.18	4325	0.8733	0.7373	1319	0.2602	1.26972	1.29955	0.552527	0.81323	0.781709	0.659585	0.325963	1.10895
CD40	0.8619	2034	0.372	1.19	942	0.153	0.8085	1688	0.311	1.07	1181	0.2322	0.684	2194	0.4347	-1.14	4331	0.8639	1.42	284	0.049	1.11	1071	0.2008	1.46	190	0.0324	0.975134	0.926611	0.821075	-0.405209	-0.355511	1.17806	-0.26811	0.626358
CD40LG	1.32	562	0.079	0.7221	2552	0.49	-1.04	3744	0.757	-0.6819	3174	0.6387	-1.04	3905	0.7872	0.4455	2848	0.5775	-1.05	3829	0.761	-0.9622	3852	0.7773	-0.9611	3150	0.6322	-1.60555	-1.06812	-1.2831	-0.277113	-0.051524	-1.79957	-0.506629	0.520926
CD44	0.6165	2691	0.524	1.18	974	0.163	-0.722	2837	0.557	-1.17	4354	0.8737	-1.6	4981	0.989	1.26	568	0.1125	-1.38	4744	0.946	-1.35	4662	0.9318	-1.2	4202	0.8443	1.04439	0.303429	-0.023673	1.04388	1.90979	1.18107	0.980889	0.363713
CD46	-0.8068	3481	0.706	0.93	1831	0.345	-1.26	4360	0.887	-0.6396	3081	0.612	-1	3812	0.7732	0.7956	2112	0.426	-1.11	4021	0.806	-0.7068	3195	0.6407	-0.5888	1852	0.3381	0.404654	0.700352	0.698109	0.935625	1.21084	0.209601	0.924439	0.292637
CD47	-0.7864	3431	0.687	0.7902	2321	0.445	0.5983	2198	0.42	-0.5736	2979	0.5945	1.01	1238	0.2416	0.6601	2524	0.5152	0.8372	1470	0.295	0.6644	2452	0.4853	1.09	574	0.1116	0.585333	0.359511	0.527786	-0.051672	-0.37038	-0.651952	0.036456	-0.052366
CD48	0.9934	1629	0.278	1.06	1384	0.248	0.7272	1910	0.359	-1.38	4711	0.9408	1.09	1050	0.199	-0.6417	3128	0.633	-1.45	4847	0.968	-0.7831	3387	0.6824	-0.8939	2856	0.5713	1.03692	-0.655778	0.07908	1.30821	1.16738	0.076513	1.06732	0.990511
CD5	-0.6684	3180	0.634	1.25	706	0.12	-0.6566	2669	0.524	1.12	994	0.1943	1.24	623	0.1146	0.6569	2535	0.51	1.45	243	0.038	1.48	167	0.0205	0.8093	1149	0.2441	1.17962	0.073408	0.332282	0.283802	-0.061928	0.854427	-0.016286	1.02004
CD52	0.9183	1852	0.335	0.9715	1687	0.315	-0.629	2608	0.51	-1.39	4724	0.9434	0.9843	1310	0.2567	1.25	610	0.1198	-1.05	3834	0.763	-0.9981	3949	0.7955	-0.8423	2637	0.5253	-0.791775	-2.04478	-2.04466	-0.829297	-1.54369	-1.66934	-0.853934	-1.62905
CD53	1.01	1559	0.27	1.51	158	0.018	-1.27	4387	0.892	1.44	181	0.0324	1.02	1208	0.2361	1.4	268	0.046	1.47	223	0.036	1.55	88	0.0127	-1.23	4289	0.862	1.19573	0.803803	-0.192089	0.801597	0.041131	1.34893	1.24406	1.22393
CD55	1.46	247	0.032	1.26	696	0.112	0.6785	2029	0.383	1.41	242	0.042	-0.6503	2852	0.5762	1.13	997	0.194	1.09	912	0.167	-1.16	4293	0.8652	-1.05	3539	0.7136	0.091749	1.20671	0.365666	0.786453	0.368613	0.847167	1.36577	1.53688
CD58	1.55	129	0.016	0.8429	2150	0.414	1.32	477	0.076	-0.8642	3631	0.7309	1.51	129	0.027	-1	4038	0.8137	1.66	53	0.009	1.4	276	0.0531	1.36	263	0.0413	0.972606	-0.890198	-0.634922	0.40746	-1.3791	-0.244627	-0.382545	-1.05751
CD59	-0.7984	3462	0.695	0.9303	1828	0.342	-1.31	4521	0.915	1.22	693	0.1333	1.21	696	0.1374	1.13	1006	0.1958	1.07	958	0.179	1.47	182	0.0312	-0.8614	2720	0.5415	1.56783	0.908348	0.729052	0.475146	0.310915	1.97762	0.775278	1.18992
CD6	0.9535	1750	0.311	0.8615	2097	0.394	-0.7215	2835	0.557	1.11	1035	0.2013	-0.7811	3199	0.6468	0.782	2168	0.4444	1.57	111	0.014	-1.28	4539	0.9053	0.6202	1551	0.3295	-0.588906	0.363265	-0.681801	-0.556834	-1.74566	0.111437	0.3639	-0.709903
CD63	-1.41	4602	0.951	-1.11	4218	0.865	-0.7576	2935	0.58	-0.7031	3219	0.6466	1.25	595	0.1086	1.2	745	0.1403	0.564	2107	0.44	0.4323	2778	0.549	-1.27	4439	0.8987	1.10074	0.211755	-0.283186	0.661925	-0.019382	1.10464	0.962656	0.716837
CD68	-0.8765	3632	0.741	-1.33	4562	0.932	1.12	899	0.156	-1.8	5037	0.9985	0.8969	1579	0.3071	0.7112	2369	0.4869	-1.01	3684	0.735	-1.34	4643	0.9295	0.7017	1403	0.2737	0.992548	-0.129526	-0.159718	-0.074954	0.184	0.366503	-0.032151	-0.759964
CD69	1.15	1097	0.182	1.37	384	0.059	-1.07	3847	0.785	0.585	2677	0.5348	-0.9324	3618	0.7302	1.09	1164	0.22	0.8087	1556	0.297	-0.8617	3601	0.7272	0.8557	1039	0.1845	-0.690624	-0.136114	-0.54806	-0.290224	-1.19424	-0.587122	-0.692128	-0.968399
CD7	-1.45	4664	0.96	-0.9567	3922	0.802	-1.44	4788	0.963	-0.9879	3957	0.7941	0.6099	2351	0.4714	0.4586	2839	0.5696	-1.42	4798	0.968	0.4691	2761	0.5445	-0.9323	3023	0.6177	1.39196	1.46326	1.04233	1.34571	1.31149	1.24872	1.58173	1.13069
CD72	0.8602	2039	0.378	1.21	871	0.148	-1.38	4677	0.938	-1.61	4961	0.9836	0.6327	2308	0.4551	-1.21	4446	0.8932	-0.9293	3400	0.677	-1.01	3964	0.7987	0.6289	1526	0.2766	0.033695	-0.915853	-0.018569	-0.077616	-0.084671	-0.923604	-0.088654	-0.102164
CD74	-0.809	3486	0.702	-1.27	4481	0.918	0.9334	1363	0.244	0.5211	2768	0.5483	1.6	57	0.0056	-1.22	4465	0.8859	0.4972	2185	0.457	1.33	415	0.0699	-0.8469	2654	0.5459	0.681047	-0.604444	0.400046	0.431309	0.347021	1.02731	-0.20025	1.22038
CD79A	-1.07	4055	0.834	-0.8414	3650	0.737	0.9022	1449	0.261	0.8996	1784	0.3504	0.9374	1441	0.2857	-0.8041	3532	0.7131	-0.5593	2367	0.475	0.9518	1618	0.3062	-1.2	4169	0.8392	-0.45928	-0.556453	0.098366	-0.038081	-0.060905	-0.162743	-0.445231	0.893636
CD79B	1.11	1220	0.201	-0.7605	3448	0.694	-0.8798	3276	0.656	1.21	706	0.1366	0.8731	1653	0.3209	-1.25	4515	0.8996	0.9423	1211	0.236	1.11	1105	0.206	-1.43	4847	0.9643	-1.41391	-1.46469	-1.28649	-0.450511	-1.02079	-0.8796	-0.982505	-0.534499
CD80	-0.548	2971	0.584	-0.7879	3510	0.708	-0.5576	2483	0.482	0.5518	2725	0.5492	0.3726	2559	0.5156	0.4511	2843	0.5769	0.5955	2048	0.415	1.01	1404	0.2677	0.8203	1114	0.221	0.407762	0.26106	0.606006	-0.351051	0.075719	-0.086747	0.431503	1.23763
CD81	0.6218	2676	0.521	1.13	1160	0.201	-0.9046	3353	0.673	0.9683	1542	0.3061	1.11	981	0.189	0.8228	2018	0.4151	0.6042	2038	0.425	1.35	375	0.06	-0.5792	1829	0.3851	0.669411	-0.531753	-0.734808	-0.343863	-0.732303	-0.026197	-1.2507	-0.746879
CD82	1.12	1199	0.198	1.1	1259	0.221	0.7393	1878	0.352	1.25	594	0.113	1.11	987	0.1865	-0.5062	2913	0.5903	1.23	604	0.109	1.45	201	0.0341	-1.08	3709	0.746	-0.552207	-0.869392	-0.697568	-1.06474	-1.72282	-0.854163	-1.21463	-0.646235
CD83	0.5768	2759	0.538	-0.9482	3903	0.797	0.8878	1484	0.267	-0.9636	3898	0.7891	-1.56	4960	0.9851	-0.6565	3163	0.6386	-0.6384	2506	0.505	-1.24	4454	0.8948	0.8166	1131	0.223	-0.342931	-0.366847	-0.68409	-0.036695	-0.088004	-1.23361	-0.563802	-0.433439
CD86	-1.48	4706	0.969	-0.6489	3207	0.647	-1.3	4491	0.908	0.7762	2174	0.4262	-1.07	4009	0.8108	-0.6908	3230	0.6515	1.23	609	0.107	0.9739	1541	0.2844	1.17	476	0.0793	0.890976	1.32734	1.12006	0.51627	0.258812	0.241359	1.17165	1.70694
CD8A	-0.6623	3168	0.624	0.8557	2115	0.398	-0.5135	2415	0.468	1.39	269	0.0489	0.751	2010	0.3959	1.36	324	0.0584	1.15	788	0.144	1.32	439	0.0832	-0.9038	2905	0.5807	1.50295	1.65485	1.21976	0.299922	-0.639281	1.97757	0.221062	1.47666
CD8B	-1.1	4124	0.851	-1.3	4517	0.924	0.7299	1905	0.356	-1.62	4971	0.9896	1.14	910	0.1753	-1.5	4873	0.9732	-1.13	4078	0.826	-0.8139	3464	0.696	-0.9179	2964	0.6041	-0.71836	-1.4888	0.01348	-0.15413	-0.212213	-0.239348	0.188058	-0.273103
CD9	-0.7872	3434	0.696	1.49	184	0.025	-1.27	4405	0.895	0.6667	2511	0.4974	0.797	1887	0.3599	-0.7589	3400	0.6854	-0.5029	2308	0.447	0.7787	2146	0.4233	-1.18	4114	0.8185	0.149389	0.145602	0.748101	0.735253	0.808824	1.07022	0.828227	1.4718
CD93	1.56	109	0.012	-0.444	3036	0.596	1.28	578	0.094	-1.24	4471	0.8969	-0.5148	2631	0.5285	-1.47	4838	0.9623	0.8357	1473	0.296	0.6341	2518	0.4972	1.63	80	0.0135	1.00004	0.863947	0.986796	1.00252	0.506124	0.190727	0.10492	0.611195
CD96	-0.8949	3680	0.751	0.864	2088	0.393	-1.22	4269	0.87	1.13	975	0.1885	1.35	384	0.0653	-1.07	4193	0.8339	0.642	1952	0.409	0.7593	2199	0.4309	-0.735	2231	0.4619	-0.49554	0.074056	0.727447	0.218193	-0.552946	0.271096	0.039273	0.880864
CD97	-1.51	4733	0.972	-1.49	4750	0.967	-0.8661	3240	0.647	-1.78	5033	0.9993	0.8749	1645	0.3304	-0.9135	3822	0.7625	-0.8911	3268	0.659	-1.2	4352	0.8688	1.48	173	0.034	1.51596	0.528132	0.348	1.68067	0.661801	-0.651805	0.891094	0.66584
CD99	-1.24	4329	0.903	-1.35	4592	0.939	0.8233	1642	0.303	-1.51	4888	0.9712	-0.5686	2705	0.5413	0.9064	1782	0.3547	-1.31	4609	0.919	-1.5	4868	0.971	-1.21	4237	0.8522	1.49872	0.574817	-0.111865	1.39812	1.83857	1.25644	1.71995	0.128217
CDA	1.41	340	0.046	1.33	486	0.073	1.07	1002	0.175	1.09	1117	0.2193	0.976	1328	0.2616	1.08	1192	0.2287	1.57	107	0.017	1.24	665	0.1228	0.9189	891	0.1761	0.809401	-0.4354	-0.793734	-0.398562	-1.28084	0.338736	-1.06625	0.317659
CDAN1	0.5706	2771	0.541	-0.6831	3273	0.655	-1.02	3686	0.743	1.23	644	0.1238	-0.6781	2924	0.5896	0.7208	2351	0.4811	-1.02	3712	0.739	1.23	670	0.1239	-1.01	3343	0.6795	1.71664	1.42512	1.25322	0.937662	1.55035	1.61958	0.987472	1.7992
CDC14A	1.22	854	0.131	1.65	34	0.004	-0.8237	3111	0.621	1.65	19	0.0023	-1.15	4199	0.8486	1.32	412	0.0766	-0.7656	2855	0.578	-0.8325	3515	0.7099	-1.22	4266	0.8584	-1.4065	0.035864	-0.468893	-0.083732	0.883833	1.38906	0.292931	0.272361
CDC14B	0.7338	2409	0.471	0.6228	2814	0.558	-1.02	3683	0.752	1.53	84	0.014	0.8579	1713	0.331	1.4	251	0.0431	0.8581	1411	0.282	1.51	130	0.0207	-1.27	4440	0.8888	-0.542987	-1.50567	-0.875564	-1.39433	-1.22468	0.127512	-0.610987	-0.531483
CDC16	-1.78	4983	0.998	0.7797	2356	0.452	-1.49	4861	0.975	0.8027	2101	0.4155	-0.8507	3382	0.6895	-0.7339	3337	0.6781	-0.7157	2712	0.547	-0.616	2999	0.6005	-1.49	4945	0.9811	-1.38099	-2.03574	-1.4245	-0.663303	-0.548072	-1.15745	-1.34347	-0.040011
CDC2	-1.09	4093	0.85	-1.5	4759	0.971	1.24	648	0.104	0.8163	2052	0.4018	0.9278	1467	0.2799	1.14	977	0.1891	0.7569	1689	0.325	-0.7642	3334	0.6724	0.9782	765	0.138	1.53491	0.612532	-1.20663	-0.478214	-0.407013	0.690518	-0.608654	-0.57298
CDC20	-1.27	4366	0.91	0.6481	2750	0.533	-1.21	4234	0.864	0.67	2503	0.4955	-1.38	4713	0.948	1.08	1184	0.2261	-0.7804	2894	0.589	-1.07	4099	0.8169	-0.739	2248	0.4644	-0.711935	-1.63226	-1.22075	-1.58357	-0.977104	-0.979132	-0.758604	-0.375384
CDC23	-1.28	4409	0.915	0.654	2730	0.529	-1.31	4511	0.913	0.9938	1453	0.2674	0.6858	2189	0.4291	1.41	242	0.012	1.16	746	0.15	-0.7861	3397	0.6428	-0.83	2585	0.5532	0.14435	0.687766	-0.816872	-0.251892	-0.477103	0.32706	0.656651	-0.192
CDC25A	-1.95	5033	1	-1.35	4584	0.937	-1.3	4474	0.908	-1.22	4435	0.892	-1.27	4473	0.9004	1.23	665	0.1285	-1.59	5002	0.992	0.8093	2048	0.3978	-0.7638	2338	0.4626	1.57585	1.20979	0.34231	1.1424	0.835471	1.76915	0.691821	-0.452182
CDC25B	0.6954	2526	0.481	1.11	1215	0.211	-1.2	4195	0.856	-0.8668	3637	0.7401	0.9111	1525	0.2996	1.38	302	0.0529	0.9857	1121	0.215	0.707	2351	0.4586	-0.9812	3219	0.6516	0.709405	0.020426	-0.496158	0.084876	0.032091	0.32031	0.45878	0.494495
CDC25C	0.8948	1928	0.351	0.6694	2682	0.522	-0.8833	3288	0.659	1.16	876	0.1628	1.1	1011	0.198	0.8739	1898	0.3812	1.45	244	0.038	1.08	1204	0.222	-1.02	3401	0.6993	-0.216832	-1.8654	-0.26948	0.025075	-0.413426	0.860003	-0.78406	0.673803
CDC26	-1.43	4639	0.957	-1.31	4534	0.927	0.7951	1732	0.318	-1.22	4431	0.8915	-1.13	4150	0.839	0.9962	1489	0.2919	-1.51	4926	0.981	-1.12	4217	0.8508	-0.9833	3228	0.6536	0.048512	-0.092945	-0.894461	0.833315	0.926598	0.427777	0.302411	-0.020295
CDC27	-1.09	4104	0.852	-1.49	4749	0.97	1.41	327	0.051	0.9149	1724	0.328	1.19	763	0.1412	0.7285	2326	0.472	-0.8438	3099	0.617	1.19	810	0.1491	-1.03	3464	0.6866	0.751832	0.082935	0.07431	0.866782	0.130973	0.25252	-0.175845	0.635839
CDC2L1	-1.8	4993	0.997	-1.59	4867	0.984	-1.29	4455	0.905	-0.5438	2937	0.5803	-1.27	4478	0.903	0.7993	2099	0.4238	-1.1	3994	0.798	-0.8128	3459	0.6994	-1.14	3927	0.7833	-1.26038	-2.2231	-2.00541	-1.37059	-0.796319	-0.874739	-1.26865	-1.61377
CDC2L2	-1.7	4938	0.995	-1.63	4908	0.989	-1.48	4850	0.973	1.28	526	0.0956	0.7411	2044	0.4023	0.6184	2622	0.5353	-0.5436	2349	0.471	0.673	2427	0.4799	-1.17	4062	0.8186	-0.817353	-1.45225	-1.58291	-0.533082	-0.770116	-0.309875	-1.15319	-0.06928
CDC2L5	0.8869	1953	0.355	-0.8312	3624	0.733	1.14	850	0.146	-0.6581	3118	0.6274	0.5585	2439	0.4902	0.9038	1793	0.3563	-1.22	4346	0.873	0.8814	1838	0.3503	-1.52	4971	0.9855	0.508042	-0.601215	-0.6801	-0.190499	0.955818	0.428086	0.248154	0.233763
CDC2L6	0.8854	1960	0.356	-0.7266	3368	0.675	-0.9714	3548	0.717	0.6491	2550	0.5106	-0.9048	3533	0.7197	0.7892	2134	0.435	0.5171	2165	0.439	-1.53	4910	0.9766	-1.02	3379	0.6854	-0.868637	-0.249419	-0.683663	-0.105438	-0.180284	-1.01192	0.324253	0.143141
CDC34	-1.54	4784	0.978	-1.56	4837	0.98	0.9131	1422	0.253	1.57	56	0.013	1.18	794	0.1474	0.8883	1845	0.3607	1.13	816	0.143	1.69	17	0.003	-0.7778	2393	0.4587	1.31227	0.762097	0.601733	0.772831	0.369657	2.29776	-0.218142	0.861141
CDC37	-1.3	4428	0.919	-0.953	3911	0.799	0.5703	2244	0.43	-1.49	4863	0.9698	1.46	198	0.0279	-1.32	4640	0.9202	1.11	880	0.17	-0.878	3652	0.7295	1.38	249	0.0514	0.634893	-1.17035	-1.45917	1.50466	-1.16546	-0.595989	-0.611686	-1.41769
CDC40	-1.11	4135	0.854	-0.9155	3829	0.78	-0.9383	3447	0.696	-1.13	4261	0.8585	-0.648	2846	0.5752	-0.8771	3733	0.7531	-1.02	3720	0.741	-1.23	4423	0.8894	1.02	680	0.1357	-0.200949	-1.36907	-1.38494	0.993907	-0.467296	-0.363609	-1.34151	-0.759116
CDC42	-1.74	4960	0.997	0.6093	2843	0.554	-1.37	4667	0.94	-1.3	4601	0.9147	1.1	1017	0.194	-1.18	4399	0.8775	0.9619	1164	0.226	-1.24	4443	0.8927	1	717	0.1421	-0.138545	-0.17107	-0.412709	0.833932	-0.434303	-0.387096	0.315095	0.113397
CDC45L	-0.9978	3907	0.8	1.11	1219	0.209	-1.6	4965	0.995	0.6125	2628	0.5275	1.36	362	0.0655	0.9601	1617	0.3172	-0.8664	3170	0.639	0.592	2617	0.519	-1.02	3428	0.6935	-0.61535	-1.57163	-1.42637	0.025769	-0.445569	-0.189041	-0.845473	-1.6728
CDC6	0.8867	1955	0.355	0.9761	1674	0.311	-0.5512	2471	0.479	1.03	1330	0.259	0.9557	1389	0.2746	1.19	780	0.1526	-0.9543	3479	0.701	0.7331	2276	0.4451	-1.26	4404	0.8826	-0.792898	-1.23737	-1.2838	-0.466558	-0.348449	-0.111588	0.404899	-0.702029
CDC7	1.27	709	0.11	0.8792	2030	0.386	1.08	986	0.172	0.7569	2240	0.438	1.38	324	0.0646	0.757	2247	0.4512	1.2	672	0.12	1.29	540	0.1003	-0.5388	1766	0.3205	-0.113327	-0.856558	-0.386301	-0.886404	-1.75161	-0.420606	-0.301358	-0.334085
CDCA8	-1.54	4773	0.977	-1.52	4785	0.972	-0.6843	2742	0.538	1.07	1175	0.2304	-1.28	4504	0.9054	-0.5381	2948	0.5965	-1.27	4486	0.897	-0.9404	3805	0.766	-1.17	4076	0.8205	-0.24287	0.485606	0.690351	0.603462	1.132	1.4821	0.909644	-1.10746
CDH1	0.5309	2825	0.565	0.9065	1926	0.365	0.7226	1923	0.363	1.22	694	0.1325	-1.09	4042	0.8184	1.39	274	0.056	-0.631	2489	0.491	1.22	713	0.1339	-0.7838	2407	0.4631	-1.33835	-1.59714	-1.37937	-2.42512	-1.18009	-1.58648	-1.50489	-0.811194
CDH15	0.7878	2244	0.431	0.9009	1949	0.369	-0.9816	3575	0.728	-1.08	4158	0.841	-1.25	4426	0.8923	1.22	698	0.1365	-1.22	4351	0.874	-0.9055	3727	0.7504	1.07	607	0.1185	1.2682	1.12041	0.273188	0.86795	0.937939	0.131054	0.617583	-0.249829
CDH2	0.4288	2898	0.578	1.03	1505	0.271	-1.22	4271	0.872	1.18	813	0.1514	-0.9854	3754	0.7624	1.14	962	0.1869	-1.56	4982	0.988	-1.41	4769	0.9494	-1.14	3946	0.7866	-0.141622	0.359987	-0.262614	0.923364	0.808673	1.18785	1.14543	1.30853
CDH5	0.5545	2795	0.558	0.9101	1916	0.361	-1.14	4036	0.822	0.662	2525	0.5043	0.5552	2442	0.4912	1.28	512	0.0988	-0.8962	3284	0.661	-0.5831	2953	0.5879	-0.7761	2386	0.4716	0.307072	-0.249899	-0.463442	-0.557405	-0.873348	-1.57929	-0.883652	-0.347118
CDIPT	1.15	1095	0.18	-0.7512	3425	0.688	1.05	1053	0.186	0.9228	1697	0.3397	0.5925	2382	0.4796	1.33	397	0.0659	-1.03	3742	0.754	0.6435	2501	0.4919	-1.1	3769	0.7703	1.37193	1.27186	0.459129	1.17165	1.3433	0.926496	1.32007	1.70383
CDK10	1.14	1121	0.185	1.19	931	0.15	1.11	911	0.157	-0.82	3512	0.7074	-0.7015	2988	0.6022	-0.4885	2899	0.5801	-1.38	4750	0.956	1.14	999	0.1823	-0.7994	2461	0.5088	0.507148	-0.269904	0.788668	0.022246	0.331514	0.215479	0.367929	1.27376
CDK2	1.31	583	0.087	0.7398	2491	0.494	1.62	87	0.012	1.09	1088	0.2144	-0.8158	3294	0.6659	-0.7174	3291	0.6698	1.13	825	0.151	-1.44	4791	0.9558	0.9813	758	0.1487	-0.142605	0.501808	-0.317184	0.923086	-0.459949	-0.223659	0.36917	0.240025
CDK3	0.6782	2568	0.505	-0.7422	3407	0.691	1.06	1022	0.18	1.22	685	0.1319	0.6453	2281	0.4486	-1.26	4549	0.911	1.25	570	0.099	-0.5515	2892	0.5788	-0.7654	2342	0.4483	-0.723282	0.115544	0.064481	1.65786	0.761617	1.12288	0.149442	1.53132
CDK4	-1.61	4862	0.987	1.14	1084	0.191	-1.68	5000	0.996	-1.01	4014	0.8126	1.39	304	0.0609	0.6441	2569	0.5223	0.6805	1857	0.365	1.53	108	0.0184	0.8812	981	0.1747	-0.14191	-2.18407	-1.28267	-0.513784	-1.17581	-0.441862	-1.34762	-1.07123
CDK5	-0.9596	3828	0.785	-1.5	4757	0.967	0.7874	1753	0.323	-0.625	3052	0.6131	-0.9871	3756	0.7604	0.9797	1554	0.3025	-0.8079	2979	0.604	0.998	1464	0.2788	-1.61	5026	0.9951	-0.166601	-1.28874	-0.447693	-0.284289	-0.047321	0.836366	-0.128	0.165082
CDK5R1	-1.33	4474	0.927	0.9971	1607	0.295	-0.9824	3580	0.724	-1.16	4324	0.8645	1.3	486	0.086	-0.9067	3808	0.7598	1.22	626	0.119	1.32	433	0.0722	0.6555	1479	0.3155	-0.261193	-0.157001	0.824312	-0.311177	-0.331123	0.00085	0.070229	0.314005
CDK5R2	1.14	1130	0.186	0.9429	1785	0.333	0.769	1803	0.334	1.31	459	0.0752	1.27	552	0.0997	0.783	2161	0.4436	1.41	309	0.05	1.32	459	0.0754	-1.04	3533	0.7206	0.987119	0.640293	0.907253	0.292782	-0.509437	1.28087	0.677001	0.949596
CDK5RAP1	1.41	355	0.048	1.14	1110	0.193	1.28	561	0.089	0.6444	2559	0.5092	-1.15	4190	0.8459	1.32	409	0.0829	-1.01	3671	0.732	0.7896	2103	0.4157	-1.11	3815	0.7585	-0.218807	0.089303	-0.970711	-0.342368	0.434328	0.191892	0.121707	-0.110646
CDK6	0.9466	1764	0.316	-1.46	4711	0.961	1.74	35	0.003	1.22	683	0.1311	-0.7238	3048	0.614	1.11	1101	0.2113	-0.9413	3434	0.692	0.5621	2668	0.5239	-1.34	4657	0.9288	-2.54609	-2.85248	-2.68374	-2.18154	-2.54696	-1.37514	-2.12408	-0.549597
CDK7	0.8677	2017	0.372	1.09	1293	0.228	-1.11	3953	0.804	0.7306	2332	0.4645	1.08	1079	0.2047	0.6109	2641	0.5383	1.58	95	0.015	1.61	52	0.0069	0.717	1362	0.2676	0.95225	0.136006	0.309086	-0.075942	-0.885017	0.035785	-0.001887	-0.346765
CDK8	1.66	39	0.004	0.8626	2092	0.398	-0.6599	2682	0.525	0.8697	1872	0.3686	1.24	614	0.117	-0.95	3910	0.7883	-0.8631	3156	0.637	1.04	1329	0.2495	-0.7404	2251	0.4462	-0.685951	-1.89615	-1.52717	-0.596794	-1.82112	-0.24718	-1.33178	-1.5005
CDK9	1.03	1507	0.258	0.4344	3017	0.606	1.24	647	0.104	-0.8197	3511	0.7065	1.54	103	0.0233	1.13	1013	0.1946	1.31	463	0.081	1.01	1411	0.2607	-0.9729	3200	0.6326	0.291646	-1.00265	-1.66875	-0.374846	-1.90747	-0.279483	-0.583041	-0.433382
CDKL1	-1.11	4130	0.854	-1.62	4895	0.988	1.11	925	0.161	-0.807	3479	0.7052	-1.21	4326	0.8747	-0.7561	3393	0.6892	0.94	1218	0.237	-0.6722	3107	0.626	1.1	550	0.106	1.50053	1.68754	1.02016	0.975071	0.201267	0.204803	1.05826	1.07472
CDKL2	0.8583	2045	0.374	1.83	3	0	-1.42	4752	0.957	0.7666	2214	0.4394	-0.7831	3202	0.6441	-0.9647	3950	0.7942	1.31	455	0.081	-1.23	4440	0.8927	0.9736	775	0.1519	-0.797413	-0.567303	-0.594539	-0.066855	-0.933648	-0.92802	-0.356628	-0.264818
CDKN1A	0.9741	1692	0.292	-0.8684	3713	0.763	1.32	480	0.077	1.33	393	0.0786	1.17	813	0.1499	1.2	764	0.1493	0.9165	1277	0.241	1.57	75	0.0138	-1.39	4774	0.943	1.18378	0.172462	0.514446	0.754372	0.731489	1.77348	0.346776	1.72101
CDKN1B	1.84	3	0	1.13	1146	0.199	1.34	449	0.072	0.5577	2714	0.5423	1.06	1122	0.2023	-1.42	4778	0.9513	0.7718	1653	0.318	0.8945	1796	0.3413	0.7902	1193	0.2141	-0.279241	-0.180801	0.411835	1.54679	-0.059821	-0.742716	-0.719696	-0.025299
CDKN1C	0.6763	2572	0.506	1.06	1381	0.247	-0.8192	3102	0.619	1.12	1013	0.196	0.478	2527	0.5014	0.7862	2144	0.4324	1.16	762	0.134	0.7221	2301	0.4586	-1.09	3754	0.7426	0.144636	-0.006033	0.222068	0.613973	0.478749	1.60743	0.638651	1.24293
CDKN2A	0.7926	2227	0.419	0.8184	2237	0.424	-0.5868	2527	0.492	0.9834	1484	0.292	-1.33	4605	0.9241	1.24	625	0.1216	-0.8253	3043	0.614	1.06	1261	0.2355	1.13	520	0.097	0.7338	0.388455	-0.877672	-0.187737	-0.554938	-0.760463	-0.67742	-0.448325
CDKN2B	1.04	1455	0.252	-0.7392	3396	0.682	0.7338	1898	0.354	1.11	1046	0.2029	1.49	157	0.026	-0.6042	3042	0.6178	0.8772	1370	0.272	0.8216	2002	0.3905	-1.06	3633	0.7288	0.047634	-0.238861	-0.291656	0.137314	-0.579454	0.840165	-0.241893	0.05291
CDKN2C	0.8851	1962	0.369	-0.9514	3909	0.796	1	1174	0.222	-0.83	3540	0.7187	0.5428	2457	0.4942	-0.7404	3352	0.6805	0.8441	1450	0.29	0.8468	1931	0.3736	1.6	96	0.0168	1.45327	0.973661	1.04662	0.423179	0.052087	-0.35122	0.100573	0.947919
CDKN2D	0.9822	1664	0.292	1.21	849	0.136	-1.5	4870	0.977	-1.2	4398	0.8825	-0.7969	3250	0.6528	1.31	434	0.0816	-0.918	3354	0.677	0.8816	1837	0.3503	-0.9612	3154	0.6323	0.444737	-0.523279	0.143798	-0.676773	-0.017049	-0.429971	-0.006053	-0.857744
CDKN3	1.34	510	0.075	1.51	163	0.021	-0.8525	3194	0.64	0.6805	2462	0.4898	1.46	200	0.0395	-1.51	4875	0.9711	1.77	17	0.004	1.32	429	0.0825	1.85	9	0.002	1.34602	0.539721	0.198318	0.75827	-1.59745	-0.254072	-1.1268	-0.866299
CDO1	-0.7362	3317	0.66	0.8694	2070	0.387	-1.23	4279	0.873	-1.46	4830	0.9618	-0.91	3547	0.7223	-1.21	4449	0.8883	-1.2	4306	0.864	-0.9322	3785	0.7618	-0.6624	1991	0.3981	0.175579	-0.130829	0.729012	-0.570808	0.305762	-0.970626	0.270395	-0.533592
CDR1	-1.52	4744	0.976	-0.7488	3422	0.688	-1.19	4187	0.859	-0.9086	3754	0.7381	-0.8272	3325	0.6514	-0.7157	3285	0.639	-0.7996	2956	0.583	-0.4201	2789	0.5308	0.7825	1207	0.274	0.183325	0.335194	-0.138963	-0.093807	-0.066456	0.285236	-0.032622	-1.78426
CDS1	1.23	840	0.134	0.5197	2977	0.593	1.57	130	0.019	1.19	808	0.1512	-0.7727	3182	0.6306	0.7499	2268	0.4566	-1.01	3686	0.734	-1.02	4012	0.8116	-1.2	4178	0.829	-0.351878	-0.0782	-0.050634	0.729163	0.558942	-0.580033	0.735652	1.05401
CDS2	-0.6366	3108	0.621	-1.67	4942	0.99	1.62	86	0.012	-1.32	4640	0.9201	-1.08	4012	0.805	-1.2	4429	0.8799	-1.06	3849	0.775	1.13	1025	0.1876	1.63	85	0.0127	1.37462	1.39454	1.39673	1.19036	1.22849	0.020283	0.795878	0.345844
CDT1	-0.6751	3192	0.637	-0.8687	3716	0.763	-0.9121	3379	0.679	1.37	315	0.0643	-1.18	4260	0.8643	1.58	42	0.011	-0.8804	3236	0.642	1.31	465	0.088	0.8172	1126	0.2025	-0.391004	-1.13816	-1.20376	-1.82225	-0.669342	-1.03591	-2.04226	-0.972106
CDX1	1.28	669	0.099	1.63	49	0.005	-0.7975	3040	0.604	-0.9033	3736	0.7588	1.42	250	0.0474	-1.01	4052	0.8141	0.879	1366	0.27	1.24	659	0.1222	-0.8603	2716	0.5404	1.35507	-0.058108	0.311138	-0.309841	0.043853	0.430635	0.603288	1.21663
CDX2	1.52	159	0.02	1.57	87	0.012	-1.43	4770	0.956	0.5523	2724	0.5446	1.5	140	0.0284	-1.42	4783	0.9519	1.19	687	0.124	1.13	1024	0.1858	0.9294	867	0.1571	0.682174	-0.549641	-0.4289	0.751698	-0.868657	0.358474	-0.517376	-1.33442
CDX4	-0.9693	3846	0.801	1.05	1420	0.255	-1.45	4798	0.96	0.7522	2256	0.4414	1.32	433	0.0844	1.07	1245	0.2347	1.34	412	0.073	1.15	963	0.1752	-1.09	3761	0.7443	0.311199	-0.823365	-0.218519	0.725885	-0.632434	1.34449	0.00926	0.759463
CEACAM1	-0.7408	3326	0.663	0.8959	1971	0.367	-0.8463	3176	0.634	0.8708	1871	0.3677	-1.42	4787	0.9538	0.6474	2561	0.5209	-0.7402	2782	0.562	-0.4577	2804	0.5614	-0.6146	1890	0.3753	0.128287	-0.080059	0.073567	0.080777	0.071243	0.052572	-0.120959	0.240411
CEBPA	-1.72	4952	0.994	-2.05	5041	1	1.76	27	0.003	1.3	471	0.0898	0.9166	1501	0.2865	0.5541	2750	0.5562	1.17	721	0.128	1.33	403	0.0783	0.8418	1070	0.1898	0.31335	0.322901	0.11686	0.013655	-0.393135	0.696698	-0.17172	0.596616
CEBPB	-1.41	4598	0.953	-1.75	4989	0.995	1.47	234	0.036	0.9811	1491	0.2803	0.7058	2133	0.417	0.7955	2113	0.426	1.29	490	0.086	0.9064	1751	0.3324	0.8018	1166	0.2091	1.45643	1.2458	1.17846	1.20701	-0.432192	1.51538	1.25953	1.15988
CEBPD	-0.5952	3036	0.597	1.09	1282	0.225	-1.37	4656	0.938	-1.41	4759	0.949	0.9806	1316	0.2592	-0.6848	3222	0.6516	-1.15	4144	0.835	1.2	799	0.1457	-0.8016	2477	0.4917	0.654282	-1.1472	0.606291	-0.503358	0.573615	-0.430209	-1.05767	-0.514796
CEL	1.19	946	0.149	1.04	1468	0.263	-0.8588	3216	0.643	1.25	592	0.1126	-1.22	4346	0.8787	1.52	77	0.0146	-0.8256	3044	0.615	-1.3	4571	0.9159	-1.29	4520	0.902	-0.656541	-0.865297	-2.12104	-0.906441	-0.900513	-0.843421	-0.505059	-1.16625
CELSR1	0.8418	2094	0.392	0.6419	2770	0.55	-0.4987	2402	0.466	1.29	495	0.0933	0.7619	1972	0.3817	0.8442	1959	0.3924	0.7294	1745	0.34	0.7554	2210	0.439	-1.41	4813	0.9507	-1.66775	-0.473107	-0.0167	-0.843988	-0.078527	0.908114	-0.10559	-0.511237
CELSR2	0.7028	2502	0.491	-1.47	4716	0.966	1.35	436	0.07	-0.6964	3203	0.6397	0.7153	2115	0.4113	-1.34	4666	0.931	0.8913	1339	0.255	-0.8318	3514	0.7105	-0.6002	1868	0.344	-1.43644	-1.40525	-1.01997	-0.656257	-1.01695	-1.33534	-1.10435	-0.264501
CELSR3	0.7515	2359	0.447	-0.7943	3524	0.712	0.6245	2150	0.408	0.8429	1961	0.3878	-1.25	4437	0.8941	1.43	208	0.0363	-1	3644	0.73	1.11	1070	0.2005	-1.15	4001	0.8081	0.846386	0.501344	0.201987	-0.387671	0.592406	0.298656	0.864388	1.09626
CENTA1	0.8283	2138	0.402	-0.8847	3755	0.774	0.725	1918	0.361	-0.91	3759	0.7591	-0.7924	3237	0.645	1.09	1163	0.22	0.9796	1132	0.207	-1.45	4803	0.9589	0.6221	1547	0.2789	-0.103446	0.772026	-0.042027	1.42573	-0.282414	-0.569075	1.34354	0.343952
CENTD1	1.06	1384	0.235	1.45	242	0.035	-1.13	4004	0.818	-1.48	4852	0.9657	-1.27	4470	0.9007	-0.7203	3299	0.665	-1.64	5023	0.994	-1.46	4816	0.9608	-1.13	3878	0.773	0.105761	-0.051104	-0.166588	0.509249	0.946283	0.024297	0.593949	0.140366
CENTD2	-0.7023	3237	0.644	-0.7748	3480	0.7	0.8803	1506	0.272	-0.9197	3784	0.7683	1.05	1148	0.2209	1.04	1349	0.2576	-0.7894	2929	0.592	0.9591	1587	0.3017	-1.29	4507	0.9005	1.31762	0.360041	0.443918	0.406326	0.856465	1.53597	1.38827	0.577982
CENTD3	0.9816	1668	0.292	-0.6738	3256	0.65	1.1	942	0.164	0.9595	1572	0.3083	0.6218	2324	0.4667	1.22	706	0.1374	-0.5903	2417	0.486	0.5748	2645	0.5254	-1.4	4792	0.9522	-0.958496	-1.2833	-1.27278	-0.600233	-1.33544	-0.978806	-0.393832	0.226237
CEP290	-0.6974	3230	0.641	0.7693	2401	0.458	-1.02	3711	0.747	0.8622	1892	0.374	1.13	931	0.1762	1.35	348	0.0632	-0.5779	2396	0.482	-0.5198	2852	0.5708	-1.33	4634	0.9264	0.926758	0.047712	-0.483219	0.763916	0.535301	0.95414	0.377295	0.865813
CER1	-1.53	4767	0.976	-1.01	4039	0.826	-0.7394	2881	0.567	-0.9152	3774	0.7581	0.9629	1369	0.2789	-0.8148	3561	0.7135	0.6093	2027	0.423	1.03	1342	0.2522	-0.9736	3203	0.6571	1.43477	0.733907	1.0358	1.5475	1.15027	1.28145	1.45282	1.60851
CERK	1.23	821	0.123	0.7312	2514	0.485	0.5086	2316	0.445	1.25	613	0.1162	1.2	724	0.1423	-1.01	4070	0.8171	1.47	222	0.036	1.39	284	0.0536	1.05	630	0.1236	1.06672	0.734441	0.710659	1.3995	-1.12668	1.38221	0.137468	0.421591
CES1	0.6869	2547	0.486	1.39	343	0.051	-1.73	5019	0.999	0.4379	2839	0.5676	-1.39	4743	0.9473	0.5976	2680	0.5433	-1.3	4579	0.914	-1.28	4536	0.9088	-1.2	4198	0.8436	-1.638	-1.53916	-0.542522	-0.857618	-0.475513	-1.14637	-0.743277	-1.16209
CES2	1.15	1090	0.179	1.37	401	0.06	-1.06	3828	0.773	0.5172	2773	0.5565	1.73	10	0.0004	0.9262	1723	0.3407	1.44	258	0.043	1.52	116	0.0173	-0.6565	1977	0.3959	0.865231	-0.372951	-0.637645	-0.685546	-1.10896	-0.313496	0.072838	-0.251605
CES4	-0.493	2929	0.585	1.44	255	0.037	-0.9685	3538	0.718	0.8279	2016	0.3937	-0.76	3151	0.6225	1.1	1132	0.2132	0.6427	1948	0.383	0.7482	2237	0.4437	-0.8565	2701	0.5253	-1.1577	-0.915732	-1.05693	-1.04815	-1.08039	-1.01048	-1.2288	-1.36773
CES7	-0.6322	3102	0.62	-1.05	4098	0.844	0.6603	2067	0.397	0.7535	2250	0.4402	-1.41	4776	0.95	-1.23	4479	0.8999	-0.6577	2556	0.503	-1.24	4451	0.9005	0.5696	1605	0.2895	0.511821	1.03757	0.736186	1.42483	0.612114	0.359906	0.03374	1.35884
CETN2	-1.23	4313	0.904	-0.909	3801	0.786	-0.7854	2997	0.6	-1.47	4834	0.9628	0.7847	1915	0.3682	-1.28	4571	0.914	-1.27	4500	0.895	-1.57	4945	0.9818	-1.03	3477	0.6879	-0.659293	-0.737814	-0.588786	0.929726	0.700759	-0.532067	0.056846	0.240227
CETP	1.65	43	0.005	-1.09	4181	0.861	1.87	11	0	-0.6628	3131	0.6233	0.9729	1340	0.2536	-0.6199	3072	0.621	-0.6721	2594	0.512	0.9884	1498	0.2744	-1.04	3494	0.6923	0.734881	0.462089	0.344248	1.16241	0.62521	0.888968	1.17403	1.22052
CFB	0.9373	1793	0.322	1.06	1377	0.246	-1.12	3996	0.81	0.9022	1764	0.3485	-0.995	3780	0.7653	0.766	2223	0.4494	-0.9173	3350	0.677	-1.3	4569	0.9154	-1.11	3824	0.7692	-0.745631	-0.776155	-1.17262	-0.838242	-0.193532	0.742263	-0.523578	-0.793653
CFD	-0.9511	3812	0.781	-0.8282	3614	0.731	0.612	2172	0.414	-1.46	4818	0.9601	-1.19	4264	0.8643	-1.34	4676	0.9296	0.7238	1756	0.355	-1.63	4989	0.9892	1.61	94	0.0166	0.568815	0.060117	-0.477483	0.918555	0.545495	-0.482056	0.345911	0.286352
CFH	1.5	188	0.021	0.5122	2985	0.583	1.23	672	0.113	-0.6234	3049	0.611	0.9411	1424	0.2915	-0.8831	3750	0.7483	1.06	966	0.189	-0.7738	3361	0.676	1.18	459	0.0957	-0.634922	-1.53444	-1.54965	-0.328136	-1.32536	-0.373589	-1.17935	-1.88088
CFHR1	-1.54	4787	0.978	1.05	1412	0.254	-1.78	5030	1	0.6962	2427	0.4864	-0.7478	3124	0.6249	-1.11	4284	0.8552	-1.25	4429	0.887	1.25	626	0.1158	1.25	381	0.0647	0.75157	0.59044	1.02011	0.818133	1.01317	0.496544	-0.909263	1.03141
CFHR2	1.18	964	0.152	0.7881	2327	0.447	1.11	916	0.158	-0.8232	3520	0.7147	0.8557	1723	0.3324	0.7943	2117	0.4316	-0.956	3482	0.702	-0.7995	3423	0.6918	-1.26	4420	0.8852	0.032673	0.905249	-0.02141	1.05588	0.639168	0.042958	0.551867	0.996341
CFHR3	0.7203	2448	0.466	0.6829	2652	0.515	1.06	1049	0.183	0.8008	2108	0.4168	-1.5	4905	0.9752	1.21	739	0.1446	-1.32	4629	0.922	-1.18	4329	0.8738	-1.18	4117	0.8276	0.135239	-0.078704	-0.494041	-0.145619	0.540671	0.025473	0.040757	0.350704
CFHR4	-0.7803	3409	0.683	-0.6	3128	0.62	-0.559	2487	0.482	1.24	643	0.1236	-1.09	4031	0.8132	1.26	565	0.1114	1.33	432	0.076	-0.9926	3931	0.7922	0.7054	1396	0.272	1.54173	2.09994	1.14444	1.19498	0.864026	1.17824	1.54082	1.61671
CFHR5	-1.1	4117	0.85	-1.61	4894	0.987	1.16	800	0.139	1.2	752	0.1383	-1.2	4308	0.8701	-0.5523	2965	0.5959	-0.7186	2718	0.556	0.9245	1701	0.3278	-1.21	4212	0.8592	-0.450959	-0.262986	1.08747	-0.459469	0.770281	1.08493	0.837017	1.08164
CFI	0.8533	2054	0.378	1.2	902	0.143	-0.4384	2372	0.455	-0.5533	2952	0.5847	1.07	1111	0.219	-0.5922	3012	0.6091	1.26	562	0.107	-0.6281	3020	0.6025	-1.36	4723	0.9492	-0.168886	0.121035	0.927542	0.125286	0.482609	1.03054	1.59689	0.737256
CFL1	1.2	910	0.142	1.09	1264	0.222	0.649	2093	0.397	-0.9468	3855	0.7821	0.8761	1642	0.3195	-1.11	4286	0.8553	-1.12	4052	0.813	1.42	243	0.0434	0.9206	888	0.1752	0.173913	-1.88965	-0.73892	-0.223726	0.208408	-0.174029	-2.41168	-1.00249
CFL2	1.12	1195	0.198	1.64	46	0.005	-1.34	4580	0.926	0.7096	2394	0.4781	-0.6657	2890	0.5835	-0.5607	2974	0.602	-0.8673	3174	0.64	-1.37	4696	0.9373	-1.34	4670	0.9305	-0.635173	-1.7514	-0.675293	-0.706552	-0.313305	-0.485497	0.145126	-0.497296
CFLAR	-0.9407	3794	0.785	0.5946	2869	0.57	-0.9748	3554	0.723	0.5041	2787	0.5556	1.22	660	0.1261	-0.6156	3065	0.6188	1.29	495	0.086	1.35	379	0.0722	-1.01	3364	0.6695	0.42684	-0.433235	-0.265899	0.254097	-0.632458	0.556897	-0.320756	-0.050679
CFP	0.6191	2685	0.535	-1.02	4061	0.835	1.38	379	0.059	0.6395	2567	0.5113	-1.34	4626	0.9275	1.08	1189	0.2246	-1.44	4824	0.96	-1.1	4165	0.8474	-1.12	3836	0.7647	0.05386	0.629949	0.981945	0.462504	1.41953	-0.067464	0.282417	1.4996
CFTR	0.8677	2018	0.368	-1.35	4588	0.938	1.48	219	0.03	1.08	1149	0.2243	-1.25	4425	0.8921	1.39	272	0.0472	-1.1	3991	0.8	-0.5523	2893	0.5781	-1.45	4891	0.9716	-0.119152	-1.18499	-1.037	-0.501184	0.523944	-0.206214	0.783459	0.993456
CGN	0.5621	2787	0.555	-1.07	4148	0.855	0.8278	1624	0.302	-0.9043	3738	0.7554	0.9929	1287	0.2411	0.7344	2309	0.4683	0.7517	1702	0.328	1.5	143	0.0243	-1.04	3521	0.6963	0.609018	0.066207	0.745374	0.182858	0.197104	0.034812	0.662091	0.044198
CHAD	-0.7096	3264	0.647	0.6296	2800	0.544	-1.07	3841	0.776	-0.6713	3150	0.6103	1.24	627	0.1096	-0.7885	3486	0.6824	1.27	533	0.096	1.04	1324	0.2421	-1.26	4402	0.9059	1.09704	1.16566	1.36865	1.09261	1.0474	1.20236	1.61005	1.38401
CHAF1A	-1.06	4047	0.832	-1.16	4320	0.885	-0.4849	2393	0.462	1.14	941	0.1815	1.2	722	0.1423	0.9458	1652	0.327	0.8145	1540	0.307	1.45	210	0.0362	-0.8705	2759	0.55	-0.852818	-1.76999	-1.02858	-1.86467	-0.910843	-0.175687	-1.7232	0.353579
CHAT	0.9797	1675	0.293	-0.7338	3382	0.678	0.9382	1356	0.242	-1.33	4653	0.9238	-0.7335	3074	0.6174	-0.785	3480	0.7029	-0.8687	3179	0.641	-0.985	3912	0.78	0.8144	1136	0.2238	0.034037	-0.254253	-0.472402	-0.08812	-0.624604	-0.331501	0.426168	-1.10735
CHD8	-1.09	4084	0.843	-0.5927	3119	0.618	-1.33	4561	0.923	1.2	762	0.1462	0.8714	1661	0.3221	1.42	218	0.0385	1.74	19	0.002	0.9242	1702	0.3242	0.8023	1165	0.2303	0.358917	0.362088	-0.993892	0.392682	-1.34385	0.325363	0.176521	0.299871
CHDH	1	1584	0.276	1.23	792	0.126	-1.08	3879	0.784	1.2	768	0.1452	-1.1	4056	0.8212	1.18	831	0.1604	0.5417	2140	0.418	0.6197	2551	0.5117	-1.07	3652	0.7237	-0.224614	0.165703	-0.199885	-0.828033	-0.321994	-0.133515	0.395366	-0.006506
CHEK1	1.26	738	0.108	1.03	1516	0.274	1.4	337	0.05	-1.56	4924	0.9816	-1	3817	0.7649	-1.21	4443	0.883	-0.9833	3582	0.722	-1.63	4988	0.9937	0.7437	1303	0.2797	0.174898	-0.454304	-0.344897	0.261718	-0.057102	-1.13908	0.597185	-0.483208
CHEK2	1.63	51	0.006	1.22	812	0.13	0.8803	1505	0.272	0.9129	1732	0.3407	0.9375	1439	0.2856	1.3	458	0.0854	-0.6609	2565	0.517	0.8839	1830	0.3484	-1.24	4344	0.8698	0.489967	-0.0479	-0.139223	-0.338571	0.501716	-0.286246	0.124709	1.81407
CHGA	0.9688	1707	0.3	0.6498	2746	0.532	0.6533	2086	0.395	0.7879	2144	0.4255	-1.13	4151	0.839	-1.53	4890	0.9733	0.8646	1401	0.278	-0.8821	3667	0.7367	1.25	376	0.0637	-0.603728	-0.351334	-0.149311	0.925629	0.043258	-0.667916	-0.844609	0.302865
CHGB	-0.7462	3334	0.672	0.6417	2771	0.55	-0.7721	2970	0.591	-0.5769	2984	0.5893	-0.911	3553	0.7186	-1.12	4292	0.8603	-0.7816	2896	0.576	-1.06	4086	0.8325	-0.9828	3226	0.6407	-1.23399	-1.16619	-0.957282	-0.601353	-1.33081	-1.18394	-1.09053	-1.21522
CHIA	-1.52	4748	0.974	-1.38	4618	0.944	0.6295	2144	0.405	1.02	1355	0.2653	0.5851	2399	0.4812	1.22	696	0.1365	-1.31	4611	0.919	0.7817	2141	0.4159	-1.05	3557	0.7164	0.993902	0.850272	0.814585	0.424522	1.38376	1.38626	1.24294	0.267368
CHKA	-0.984	3883	0.798	-1.2	4382	0.897	1.23	682	0.114	1.37	313	0.0558	-1.19	4283	0.8665	1.44	192	0.0334	-1.1	3983	0.796	0.6492	2484	0.4914	-1.29	4525	0.9022	-0.1107	-0.305012	-0.090172	-0.076296	1.2823	1.30216	0.374489	0.898426
CHKB	0.9127	1872	0.339	0.9112	1913	0.357	-0.3992	2363	0.453	-0.7752	3386	0.6888	1.63	44	0.0054	-0.537	2947	0.5961	1.2	675	0.124	1.11	1095	0.2049	-1.22	4249	0.855	0.728829	0.263522	0.770688	0.501817	-0.042336	0.238885	0.58121	0.025873
CHMP1B	-1.22	4301	0.898	-1.18	4348	0.892	0.7146	1947	0.364	1.37	312	0.0499	0.9863	1303	0.2663	1.14	968	0.1856	-0.6486	2526	0.522	-0.5527	2894	0.5757	-1.43	4855	0.9699	0.124633	-0.113616	-0.940344	0.47341	0.997129	1.38435	0.959407	1.60631
CHN1	-0.576	3005	0.591	0.9362	1810	0.338	-1.14	4039	0.818	-0.9718	3917	0.7931	0.8799	1630	0.3171	-1.35	4690	0.9326	1.27	538	0.095	1.04	1303	0.2458	1.43	213	0.0359	1.01507	0.735944	0.854812	1.12252	0.893779	0.424786	-0.027006	0.699962
CHP	-0.8975	3688	0.753	-0.65	3209	0.639	-0.9499	3484	0.701	-0.521	2918	0.5756	-1.36	4671	0.9395	1.13	985	0.1881	-1.43	4817	0.97	-1.4	4757	0.9506	-1.41	4811	0.9634	-0.799754	-0.25278	-1.42015	-0.86667	1.36169	-0.406491	0.501698	-0.13161
CHPF	0.7471	2370	0.45	0.5027	2991	0.585	0.5787	2232	0.427	0.71	2391	0.4778	0.8819	1620	0.3257	0.6063	2651	0.5302	-0.7171	2715	0.555	1.06	1266	0.238	-1.47	4912	0.9788	-1.04049	-2.32694	-0.5135	-0.879182	-0.962035	-0.562492	-0.768495	0.267223
CHPT1	-0.6097	3064	0.602	0.746	2477	0.474	0.494	2325	0.447	1.01	1386	0.2726	-0.7908	3229	0.6487	0.6544	2541	0.5177	1.03	1032	0.194	0.6657	2448	0.4843	1.31	317	0.055	1.1523	1.13387	0.556817	0.412296	-0.223021	-0.243704	-0.032577	-0.072654
CHRD	1.26	752	0.116	-0.9715	3955	0.817	1.75	30	0.003	1.06	1209	0.2325	1.39	293	0.0598	-0.5999	3029	0.6122	1.54	136	0.025	0.6133	2564	0.5145	-0.8962	2864	0.5607	0.848557	0.514616	-0.387781	0.64216	-0.731359	1.34578	0.821963	0.345478
CHRM1	-1.23	4306	0.899	-0.7362	3387	0.68	-0.5985	2549	0.495	-0.8771	3661	0.7459	-0.6425	2837	0.5722	0.7958	2111	0.4306	0.7342	1740	0.35	-1.12	4209	0.8486	1.28	357	0.0598	0.731253	-0.498089	-1.73615	0.366972	-1.49898	0.111794	-0.789639	-0.721091
CHRM2	-1.06	4038	0.83	0.7412	2489	0.477	-1.03	3714	0.748	-1.43	4777	0.9532	-0.6845	2940	0.5927	-0.8537	3672	0.7414	-1.05	3828	0.761	0.8795	1842	0.3512	-0.768	2351	0.4661	0.375503	-0.416907	0.238917	-0.031719	0.32326	-0.077049	-0.136082	0.794663
CHRM4	-1.16	4215	0.876	-1.42	4665	0.954	1	1179	0.21	1.05	1237	0.2445	-1.17	4232	0.8542	0.906	1783	0.3592	-0.6237	2478	0.512	0.8791	1843	0.3573	-0.7427	2264	0.4666	0.491952	0.553059	0.6226	0.019404	0.416771	0.160643	0.171617	0.789681
CHRM5	-1.78	4985	0.998	-0.5787	3100	0.615	-1.7	5011	0.997	-1.57	4934	0.9796	0.5695	2426	0.4863	-0.8666	3703	0.7479	-0.8704	3185	0.642	-1.36	4689	0.9361	-0.6662	2004	0.3995	0.523369	0.092877	0.060336	1.44273	0.53709	-0.238875	1.37935	-0.024392
CHRNA1	-0.6423	3124	0.614	0.8281	2196	0.417	-0.5876	2531	0.492	0.5295	2759	0.5544	1.29	495	0.0915	0.6343	2596	0.5273	0.9677	1156	0.223	1.12	1046	0.196	-1.24	4339	0.8697	-0.220147	-1.04597	0.120216	-0.390516	-0.615577	0.610229	0.375096	0.526161
CHRNA10	-0.8398	3558	0.725	0.9935	1620	0.296	-1.37	4646	0.934	1.34	382	0.0761	-1.11	4100	0.8293	1.08	1176	0.2227	0.8024	1564	0.301	-0.7822	3383	0.6829	-1.12	3849	0.7689	-2.99584	-1.43562	-1.91088	-2.14238	-1.79066	-0.946421	-1.78714	-1.597
CHRNA2	1.44	277	0.038	-1.05	4101	0.845	1.47	231	0.036	-0.9382	3830	0.7753	-0.8199	3306	0.661	-0.911	3817	0.7678	-1.34	4678	0.927	-0.4598	2805	0.565	0.5302	1644	0.2949	0.770282	0.587948	0.317237	1.12629	1.21501	0.256871	-0.210868	-0.155087
CHRNA3	-0.4821	2924	0.584	1.01	1571	0.284	-1.06	3816	0.778	1.3	491	0.0859	-1.36	4676	0.9361	1.59	35	0.0049	-1.01	3683	0.735	0.9055	1754	0.3358	-1.31	4575	0.9136	-0.613869	0.872574	0.386987	0.009812	0.982686	0.858036	0.574375	1.45143
CHRNA4	1.13	1158	0.191	0.9079	1921	0.359	-0.6406	2632	0.515	-0.8212	3515	0.7137	-0.6343	2822	0.5687	0.5735	2724	0.5523	0.9246	1258	0.245	0.9352	1662	0.317	1.06	617	0.1214	0.000569	-1.70305	-1.10293	-0.707798	-0.949442	-0.161038	-1.66966	-0.558598
CHRNA5	1.1	1259	0.21	1.29	580	0.092	-1.45	4803	0.965	1.26	581	0.1103	-1.53	4934	0.9809	1.08	1208	0.2321	-0.9153	3345	0.676	-1.47	4823	0.9636	-1.14	3942	0.7967	-0.79655	-0.571822	-0.673892	-0.58086	-0.19579	-0.553477	-0.022593	-0.447234
CHRNA6	-0.701	3233	0.649	0.9981	1603	0.292	-1.47	4842	0.967	-0.6977	3209	0.646	1.07	1082	0.2061	1.47	134	0.0241	0.7833	1619	0.323	1.26	610	0.1125	-1.03	3454	0.6986	0.24887	-1.32282	-0.718501	-0.260878	-0.116862	0.07369	-0.906919	-1.08162
CHRNA7	1.43	285	0.039	1.1	1239	0.216	-0.7974	3039	0.604	-0.8572	3606	0.7347	-1.3	4547	0.913	-0.8894	3770	0.7583	-1.62	5016	0.994	-1.03	4015	0.809	-0.6212	1905	0.378	-0.786058	-0.86067	-0.589209	-0.202088	0.55331	0.355638	-1.05013	-0.069177
CHRNA9	-0.691	3216	0.638	-0.9085	3799	0.775	0.7961	1730	0.317	1.13	968	0.1866	1.27	561	0.1023	0.695	2415	0.4917	1.37	363	0.064	1.29	527	0.0886	0.9268	873	0.1868	-0.316896	-0.022581	0.852703	0.426043	-0.400538	0.02809	0.072183	1.00909
CHRNB1	-0.8127	3492	0.703	0.5856	2883	0.562	-0.7654	2950	0.585	-0.6979	3210	0.6441	-0.8334	3343	0.6748	1.37	311	0.0468	-1.16	4166	0.844	-1.35	4667	0.9311	-1.58	5014	0.9964	-0.670373	-1.69984	-1.0541	-1.45107	0.298077	-0.25298	0.08675	-0.595475
CHRNB2	1.27	717	0.111	0.6086	2846	0.564	1.26	607	0.097	1.12	1000	0.1952	-1.64	5008	0.9937	0.7565	2250	0.4575	0.6153	2015	0.408	-1.11	4187	0.8466	0.6595	1472	0.2896	0.391435	0.543074	0.001322	0.419429	-0.096179	1.14978	-0.028918	-0.39515
CHRNB3	1.25	768	0.114	1.24	746	0.119	0.999	1188	0.211	-0.8933	3707	0.7529	0.8052	1866	0.3654	-0.5986	3025	0.6152	-0.7626	2847	0.575	-1.07	4100	0.8285	0.8651	1018	0.1995	-0.015011	-0.191781	0.376222	1.24906	0.289616	-0.408654	0.719107	0.467212
CHRND	1.12	1197	0.201	0.806	2274	0.445	0.7907	1746	0.323	0.6329	2584	0.5191	-0.5812	2732	0.5446	1.4	262	0.0449	-1.17	4196	0.844	0.6636	2455	0.4856	-1.5	4951	0.9824	0.775669	-0.002374	-0.513539	0.431269	1.23903	0.527351	0.960578	0.645552
CHRNE	1.55	121	0.013	1.02	1522	0.274	1.28	572	0.093	-0.6969	3207	0.6454	1.13	933	0.1768	0.8176	2037	0.4156	0.844	1451	0.29	0.8913	1804	0.3448	-0.5809	1835	0.361	0.286938	-0.523082	-0.44839	-0.082376	-0.447939	0.116811	-0.136922	0.062456
CHRNG	1.42	316	0.044	1.24	765	0.121	-0.9288	3426	0.689	0.7623	2227	0.4432	1.36	364	0.0658	-0.8525	3667	0.7409	0.9693	1152	0.223	0.7666	2178	0.4249	-0.9816	3222	0.6521	-1.59023	-1.29821	-0.581726	-0.535423	-1.59961	0.200012	-0.102115	-0.190096
CHST1	1.65	40	0.004	1.64	44	0.005	1.07	1008	0.175	1.28	536	0.0978	0.7879	1908	0.3754	-0.8166	3565	0.7203	0.6715	1878	0.382	1.3	491	0.0896	0.8875	958	0.1886	0.992684	0.903924	1.32561	0.508131	0.819952	1.496	0.299331	0.935615
CHST11	-0.8097	3488	0.702	0.9291	1834	0.343	-1.07	3844	0.777	1.01	1417	0.2767	-1.18	4250	0.8622	0.9963	1488	0.2918	-0.8767	3214	0.647	1.06	1255	0.2343	-1.2	4168	0.8392	1.08901	0.907232	0.904369	0.032866	0.658478	1.17187	0.353636	1.20787
CHST12	-0.8555	3590	0.728	-0.9298	3863	0.787	-0.9145	3386	0.679	0.912	1736	0.3417	-0.6106	2779	0.5581	-1.02	4096	0.8212	-1.05	3840	0.763	-0.8649	3611	0.7269	-1.28	4494	0.8984	0.325633	0.617578	0.363256	1.38704	1.06239	1.35852	0.232926	1.26044
CHST13	1.2	911	0.149	1.49	180	0.024	-1.18	4151	0.847	-0.8963	3718	0.7547	1.55	94	0.0145	-0.7519	3382	0.6871	1.34	406	0.072	1.16	906	0.1662	-1.06	3621	0.7267	0.153	-1.44405	0.099208	0.345832	-1.19016	0.494148	0.598376	-0.427701
CHST14	-0.5781	3008	0.603	0.9998	1597	0.291	-0.5083	2409	0.468	0.7709	2194	0.4293	1.37	341	0.0671	-0.7825	3473	0.6973	1.21	653	0.115	1	1442	0.2652	-1.05	3580	0.7072	1.55189	1.62816	1.51768	1.83437	1.20051	1.20997	1.78431	2.16047
CHST2	1.23	823	0.124	1.21	856	0.138	-1.21	4242	0.865	0.7291	2337	0.4685	1.47	178	0.0245	-0.6538	3158	0.6327	1.48	215	0.031	1.3	497	0.082	0.8506	1052	0.2225	0.496892	-0.406848	0.309765	-0.131384	-1.24615	0.258849	-0.235326	0.417829
CHST3	1.42	327	0.046	1.54	127	0.017	-1.23	4275	0.872	-1.06	4107	0.8323	1.52	112	0.0249	1.07	1246	0.235	1.17	738	0.13	1.08	1196	0.2182	-1.04	3531	0.6981	0.602748	-0.435677	-0.319478	0.28838	-0.928311	1.10317	0.423299	-0.574909
CHST4	-0.8363	3549	0.723	0.7537	2449	0.484	0.5601	2266	0.435	-0.5201	2911	0.5761	1.46	203	0.0396	-1	4039	0.8138	1.32	452	0.08	1.23	685	0.1299	0.8989	936	0.1681	-0.264104	-1.3214	0.288804	-0.122937	-1.17483	-0.677328	-0.396925	0.687835
CHST6	-1.17	4223	0.878	-1.3	4527	0.926	1.11	920	0.16	1.34	361	0.0642	1.18	782	0.1527	0.6124	2636	0.5373	1.09	922	0.169	1.21	750	0.1368	-1.01	3351	0.6807	0.978159	0.442911	0.489134	0.285156	-0.246838	1.18033	0.164307	1.74206
CHST7	1.24	797	0.127	-0.636	3180	0.643	1.38	370	0.058	-0.7173	3243	0.6504	0.6363	2299	0.4533	-0.478	2887	0.5855	-0.8548	3131	0.624	0.8899	1811	0.3445	1.31	315	0.0504	0.631592	-0.277933	-0.118527	-0.637586	-0.298878	-0.60114	-0.559228	-0.29864
CHSY1	0.762	2328	0.439	1.56	99	0.011	-0.9118	3378	0.678	1.19	803	0.1527	-0.902	3520	0.7182	-0.7541	3387	0.6883	-0.9287	3396	0.684	0.9046	1757	0.3365	-0.9534	3114	0.626	-0.973216	-1.16515	0.121735	-1.13425	-0.549316	0.078575	-0.261323	0.27217
CHUK	-0.413	2904	0.566	-0.9588	3929	0.8	0.8474	1580	0.305	1.19	788	0.143	0.9937	1284	0.2633	1.01	1435	0.2814	-0.628	2484	0.513	1.06	1253	0.2328	-1.51	4958	0.9866	1.13814	0.993681	0.028243	1.05917	0.899657	1.77325	1.3019	1.64155
CIDEB	0.5287	2830	0.553	0.5307	2966	0.578	0.7483	1859	0.347	-1.38	4715	0.9413	-1.38	4706	0.9414	1.1	1108	0.2122	-1.65	5027	0.997	-1.31	4595	0.919	-0.9201	2974	0.5951	-0.380136	-1.01948	-0.433904	-0.573413	1.12333	-0.541033	0.079708	-0.571899
CIITA	-1.63	4891	0.991	-0.5347	3065	0.605	-1.29	4441	0.903	0.7406	2301	0.4621	1.27	558	0.102	0.8651	1920	0.3874	1.12	846	0.163	1.31	486	0.0797	-1.06	3594	0.7347	1.36176	0.648531	1.01459	1.29383	0.879622	1.97418	0.634383	1.39615
CIP29	1.24	792	0.118	1.59	74	0.009	-1.27	4399	0.894	0.627	2594	0.5213	-0.8351	3349	0.6789	1.13	1012	0.1968	-0.918	3355	0.677	1.29	521	0.0947	0.8187	1119	0.2221	-1.00736	-1.95152	-2.33195	-2.22501	-1.52512	-1.61718	-2.32697	-1.90298
CIR	1.07	1364	0.233	1.4	316	0.047	-1.31	4519	0.914	-1.69	5001	0.9956	0.6475	2273	0.4542	-1.32	4650	0.9225	-1.37	4717	0.95	-0.8946	3702	0.7378	-0.9242	2994	0.6094	-0.31998	-1.8733	0.119042	-0.134075	0.305451	-0.969229	-0.100859	-0.945693
CIRBP	0.8256	2147	0.404	-0.7381	3391	0.69	0.6741	2038	0.39	0.5318	2757	0.5494	-0.8812	3459	0.6992	-1.31	4628	0.9244	1.33	422	0.074	-1.01	3989	0.8071	1.51	154	0.0237	-1.22187	-1.3181	-1.12713	-1.4618	-2.14245	-1.09037	-1.68714	-1.65557
CISH	0.7162	2462	0.483	0.9538	1750	0.325	-1.28	4428	0.898	1.37	307	0.0629	-0.8273	3326	0.6656	-0.5607	2975	0.6013	1.57	102	0.019	1.39	291	0.0558	0.8128	1140	0.2044	-0.103333	1.19777	0.739908	0.055352	-0.679643	-0.431134	0.14837	0.540997
CIT	1.27	714	0.104	1.01	1568	0.286	1.35	432	0.067	0.9502	1609	0.3196	-0.854	3391	0.6851	0.5495	2756	0.5507	0.5468	2133	0.446	-0.8165	3472	0.6969	-0.6957	2094	0.4392	-0.363125	0.199933	-1.0034	0.648228	-0.259763	0.631845	-0.246201	0.138399
CITED1	1.37	451	0.063	1.24	757	0.13	-0.6087	2569	0.5	-0.6052	3019	0.5995	0.9187	1492	0.2849	1.07	1250	0.2355	1.15	779	0.136	1.12	1064	0.1944	-0.5964	1862	0.3419	0.203201	-0.841807	-0.432886	-0.846535	-1.03268	-0.328805	-0.289834	-0.587309
CITED2	-1.39	4575	0.945	0.5682	2915	0.568	-1.63	4979	0.993	-1.62	4967	0.9861	0.7392	2053	0.4034	-0.6239	3082	0.6251	-1.2	4288	0.861	-1.04	4037	0.8126	1.03	656	0.1298	1.37781	1.42898	0.189766	0.991746	0.650828	-0.333989	0.823084	0.396059
CKB	-0.6451	3128	0.615	-0.5307	3060	0.605	1.06	1028	0.181	-0.8273	3533	0.7169	0.9775	1323	0.2611	0.6543	2542	0.5178	1.09	918	0.169	-0.7718	3356	0.6775	-0.875	2778	0.5546	1.12681	1.20626	0.230018	1.05725	0.408548	0.858285	1.17761	0.324372
CKM	0.8326	2120	0.4	-0.8023	3540	0.725	0.9662	1285	0.227	-0.6418	3084	0.6132	0.5461	2454	0.4858	0.7626	2230	0.4467	-0.6667	2581	0.509	0.9814	1516	0.2784	-0.6315	1921	0.3575	0.980624	0.768104	1.02892	1.13283	0.735567	0.851913	0.995125	1.10013
CKMT1A	1.49	202	0.024	0.4521	3014	0.592	1.35	435	0.067	1.61	32	0.0048	1.09	1024	0.1955	0.5249	2784	0.5648	1.34	419	0.073	1.23	674	0.1251	-0.619	1901	0.3769	-0.639187	-0.82744	-0.262481	-0.680982	-1.83529	0.067107	-0.800825	-0.13821
CKMT1B	0.9704	1702	0.299	-1.03	4073	0.831	1.67	60	0.007	1.06	1225	0.242	1.24	632	0.1181	1.06	1251	0.2392	1.05	1004	0.196	1.02	1377	0.2591	-1.02	3376	0.6952	-0.38515	-0.983866	-1.1215	-0.284073	-1.37257	0.296401	-0.886752	0.005236
CKMT2	1.44	272	0.037	1.2	881	0.141	0.5584	2270	0.434	-0.6244	3051	0.6128	-0.8794	3458	0.7052	1.26	573	0.113	-1.55	4962	0.986	0.9166	1723	0.3292	-1.03	3439	0.6954	-0.024063	-0.972826	-0.418556	-0.173179	0.745351	-0.235803	-0.628634	0.328981
CKS1B	0.8863	1957	0.358	1.11	1194	0.209	0.9443	1340	0.239	-0.9507	3866	0.7832	0.8514	1742	0.3355	0.6396	2579	0.5247	-1.17	4209	0.846	-1.45	4801	0.9579	-1.13	3875	0.7809	0.147864	0.315236	0.055076	1.10841	0.576302	0.342963	0.69736	0.247403
CLC	0.7588	2338	0.453	0.8755	2050	0.388	0.9141	1418	0.252	0.874	1861	0.3598	1.21	693	0.1327	0.6984	2407	0.4914	-1.04	3808	0.757	0.784	2130	0.4198	0.9671	792	0.1422	1.00217	0.465167	0.346026	0.599926	0.149656	-0.066	1.00184	-0.323102
CLCA1	0.8491	2070	0.381	-1.66	4931	0.992	1.68	58	0.007	1.05	1272	0.2483	0.6924	2173	0.4302	1.23	670	0.1306	0.8938	1329	0.261	-0.5701	2925	0.5836	-1.01	3359	0.6831	1.33344	1.28181	-0.346536	0.712602	0.834487	0.556786	0.955529	2.03725
CLCA2	-1.1	4126	0.852	-1.14	4284	0.878	-1.35	4599	0.93	-0.7257	3264	0.6623	0.7735	1947	0.3832	-1.36	4697	0.933	1.68	45	0.005	1	1440	0.2739	0.7924	1188	0.2353	0.34958	-0.106171	0.405332	0.424746	-1.04133	-0.773434	-0.131741	-0.528059
CLCA4	0.7596	2334	0.453	-1.43	4673	0.956	1.5	202	0.031	-0.9916	3966	0.8016	-1.31	4570	0.9179	-0.9779	3983	0.8003	-1.37	4724	0.942	-0.6663	3096	0.6231	-1.23	4300	0.8642	0.30028	0.572923	0.923452	1.06053	1.48011	1.64537	1.13073	1.23229
CLCF1	0.9335	1805	0.325	1.15	1070	0.185	-0.8456	3174	0.634	-0.6923	3191	0.6435	-0.8533	3388	0.6909	-0.814	3558	0.719	-0.8053	2972	0.602	-1.24	4444	0.8927	-1.04	3503	0.7065	-0.242184	0.63626	-0.16855	0.664754	0.338889	-0.037241	0.854193	-0.796631
CLCN2	0.8346	2115	0.398	-1.28	4496	0.926	1.55	149	0.022	-1.64	4981	0.9866	1.43	232	0.0468	-1.56	4923	0.9784	1.2	677	0.121	1.01	1420	0.2618	1.02	678	0.1245	0.266006	-1.57022	0.266024	0.105919	-0.80022	0.099997	-0.03053	-0.77599
CLCN7	0.6584	2594	0.503	-1.54	4809	0.975	1.67	64	0.007	-1.24	4467	0.8923	1.05	1140	0.226	-1.53	4900	0.9786	-0.768	2863	0.582	1.35	373	0.0594	1.83	16	0.0006	1.32372	0.648991	1.19254	0.280322	0.745935	-0.049165	-0.77553	-0.096184
CLDN1	1.21	891	0.144	1.53	145	0.019	-0.9608	3513	0.712	1.17	845	0.1611	-0.6953	2968	0.5982	1.26	566	0.1123	0.6798	1858	0.379	1.14	975	0.1799	-0.7426	2263	0.4481	0.034371	-0.331714	-0.629881	-0.29608	-0.525927	0.91256	-0.704357	-1.188
CLDN10	-1.75	4967	0.997	-0.9098	3806	0.776	-1.29	4440	0.902	-0.927	3799	0.7732	-0.6417	2834	0.5721	-0.7472	3371	0.6837	-0.966	3518	0.707	-1.2	4351	0.8772	0.637	1512	0.2982	0.839374	0.292794	0.206227	1.48698	1.02273	1.80414	0.82854	0.335136
CLDN11	-1.02	3963	0.816	1.05	1419	0.254	-1.59	4958	0.99	0.838	1979	0.3917	1.26	571	0.1081	1.28	502	0.0972	1.52	160	0.026	1.64	31	0.0046	0.6541	1483	0.2917	1.31573	0.187421	-0.023779	-0.1716	-0.66616	-0.392147	-0.509551	0.675312
CLDN14	-1.37	4525	0.942	-0.7698	3472	0.706	0.6202	2161	0.414	0.8569	1911	0.3725	1.24	622	0.1189	0.6452	2568	0.5217	0.7637	1669	0.322	1.4	264	0.0516	-0.9737	3204	0.6332	1.33265	1.03783	1.55927	0.424186	0.569569	1.60975	1.51686	1.71054
CLDN15	1.27	713	0.11	0.778	2361	0.467	0.735	1895	0.354	1.53	91	0.0205	-0.7284	3061	0.6034	1.55	56	0.0156	0.4582	2215	0.431	1.35	374	0.0711	-1.35	4699	0.9283	-0.68161	-1.75229	-1.33639	-1.99915	-1.13698	0.748371	-1.17309	-0.810216
CLDN16	0.81	2185	0.416	0.79	2322	0.459	-0.5849	2525	0.49	1.33	392	0.0693	1.2	717	0.142	0.6802	2470	0.5053	1.1	895	0.163	1.51	127	0.0206	-1.33	4639	0.9268	1.3342	1.37856	1.18137	0.698771	0.703208	1.31756	0.703928	1.71669
CLDN17	-0.9649	3835	0.798	-0.9721	3957	0.817	-0.9365	3443	0.694	0.7218	2356	0.4626	0.392	2557	0.5076	0.5592	2745	0.5551	0.6106	2025	0.396	-0.8518	3572	0.7212	0.8834	975	0.1736	0.240587	0.105978	-0.095882	1.81638	1.07702	-0.539785	0.302442	1.16893
CLDN18	0.5444	2809	0.549	1.09	1284	0.226	-1.33	4549	0.92	0.6382	2573	0.5168	0.9278	1466	0.2907	-1.45	4813	0.9581	1.31	470	0.084	0.847	1930	0.3735	-0.6772	2040	0.4057	-0.583561	-0.595421	0.422329	0.811252	-0.700861	1.46397	0.342053	-0.107463
CLDN19	-1.3	4427	0.925	-0.6807	3268	0.661	-1.09	3904	0.794	1.4	259	0.047	-1.28	4499	0.9043	0.9628	1612	0.315	0.8824	1356	0.268	0.559	2674	0.5311	-0.7916	2437	0.4846	1.30755	1.45798	1.39506	1.30137	1.00714	1.22528	1.57087	1.64092
CLDN2	-0.9218	3759	0.766	-1.12	4246	0.871	1.13	873	0.152	-0.9815	3936	0.7973	-1.78	5043	0.999	1.45	167	0.0301	-1.36	4709	0.939	-1.49	4860	0.969	-0.9843	3233	0.6543	0.161411	-0.151329	-1.47983	-0.391504	0.436211	-1.878	-0.890573	-0.770247
CLDN20	0.7089	2486	0.473	0.7558	2442	0.468	-0.6202	2595	0.505	0.7436	2291	0.4599	-0.7429	3105	0.6259	1.45	170	0.0246	-0.9595	3495	0.706	1.46	194	0.0245	-0.9793	3215	0.6625	0.218998	-0.233838	-0.002481	1.33544	1.14077	1.59396	0.571269	0.75263
CLDN22	0.5787	2755	0.538	0.7137	2580	0.496	0.6333	2134	0.404	0.7746	2181	0.4364	0.7212	2099	0.4183	1.44	191	0.0275	-1.14	4117	0.832	0.7675	2172	0.4244	-1.44	4874	0.9735	-0.953208	-1.48595	-1.55649	-1.01	-0.361688	0.474356	-0.314907	-0.849171
CLDN23	-0.8369	3551	0.717	-1.16	4305	0.883	1.26	608	0.1	0.8748	1856	0.3659	0.8654	1678	0.326	-0.6349	3110	0.6297	-0.6822	2624	0.527	1.46	196	0.0332	0.6055	1569	0.3079	0.497196	0.767637	0.035218	0.208821	0.689658	0.448913	-0.56328	-0.193887
CLDN5	1.54	132	0.014	1.26	670	0.109	-0.9692	3541	0.715	-0.6938	3197	0.6442	0.8232	1811	0.3528	-0.6527	3153	0.6379	-0.8384	3078	0.623	0.9895	1495	0.2837	0.6552	1480	0.2914	0.86891	-0.247553	-0.450159	0.825467	0.207178	-0.296055	-0.296919	0.038097
CLDN7	0.7842	2256	0.424	0.7499	2467	0.471	-1.12	3976	0.803	-1.18	4368	0.8754	-0.7449	3113	0.6236	1.06	1258	0.2426	-1.45	4844	0.968	1.26	600	0.1103	-0.9144	2941	0.5906	0.976556	-0.322215	-0.460457	-0.422286	0.620101	0.3067	-0.154812	-1.36503
CLEC10A	-1.29	4418	0.916	-0.7972	3529	0.714	0.7858	1756	0.323	-1.01	4006	0.8087	-1.37	4688	0.9384	-0.5684	2981	0.605	-1.25	4432	0.887	-1.45	4800	0.9578	0.7936	1186	0.2348	1.44357	1.67983	1.08763	1.5659	1.47168	0.660362	0.755304	1.47704
CLEC5A	0.8864	1956	0.358	1.12	1175	0.203	-1.02	3703	0.755	0.5532	2719	0.5441	-0.7768	3189	0.634	1.53	72	0.0195	-1.55	4963	0.985	-0.8883	3682	0.7392	-1.1	3773	0.7503	-1.1124	-1.5635	-1.64267	-1.8843	-1.12024	-0.62013	-1.2764	-1.13626
CLEC7A	0.7207	2446	0.466	1.14	1097	0.189	-0.8382	3158	0.629	1.05	1268	0.2479	0.5317	2471	0.4967	-0.5357	2944	0.5959	-0.8024	2965	0.6	0.7129	2327	0.4557	-0.5555	1799	0.3534	-1.1444	-1.83412	-1.25781	-1.15385	-2.13332	-1.29187	-1.02128	-0.791836
CLIC1	-0.9174	3749	0.763	-1.56	4842	0.98	1.12	891	0.155	0.7052	2404	0.4806	0.7247	2090	0.4115	1.06	1255	0.2416	0.6317	1974	0.401	-0.9455	3817	0.7689	-1.42	4842	0.9634	0.149706	0.558188	0.226691	0.690037	1.09871	1.16786	1.11213	0.660931
CLK1	1.03	1497	0.258	-0.6761	3261	0.651	1.01	1152	0.207	0.9676	1547	0.3026	-0.9968	3786	0.766	0.657	2534	0.516	-0.8362	3074	0.622	-0.5961	2972	0.5927	0.5555	1619	0.3184	0.214978	-0.460478	-0.831492	-0.272286	-0.571279	-0.866327	-0.464243	-0.938976
CLK2	0.88	1978	0.36	-1.23	4422	0.905	1.23	668	0.112	0.5632	2707	0.5464	0.9176	1495	0.2975	0.6371	2591	0.526	0.7963	1579	0.317	1.19	840	0.1521	0.6991	1410	0.2747	-0.018339	-1.01858	-0.18917	-0.708024	-0.384434	0.668282	-0.39613	0.165628
CLK3	0.8057	2195	0.419	0.766	2412	0.477	0.7261	1913	0.36	-0.6741	3157	0.6297	-0.7391	3091	0.6093	0.4771	2823	0.5744	-1	3633	0.728	-1.07	4108	0.8363	-0.7287	2208	0.4214	-0.413413	-0.611495	-1.47877	0.405956	-0.733055	-1.0726	-0.774309	-0.731849
CLK4	1.02	1530	0.267	1.17	1001	0.165	-0.5303	2434	0.492	0.6592	2530	0.5015	0.8937	1591	0.319	0.4695	2829	0.5677	-0.8702	3184	0.643	0.5938	2613	0.5125	-0.8825	2802	0.5753	0.271515	-0.551922	-1.04333	0.376974	-0.376349	0.396652	0.138652	-0.361033
CLN3	0.7104	2482	0.472	-0.4607	3038	0.596	0.7405	1876	0.351	-0.5827	2988	0.5954	-0.4921	2606	0.5262	0.8337	1989	0.4092	0.7937	1587	0.331	1.02	1384	0.2602	-0.5144	1743	0.3675	1.46701	0.936406	0.842552	0.820901	0.698076	0.051139	1.21154	1.37565
CLOCK	-1.09	4099	0.85	-1.48	4734	0.968	1.54	158	0.023	-1.06	4121	0.8313	-1.24	4394	0.8863	1.06	1283	0.2466	-1.38	4757	0.948	-1.78	5038	0.9988	-1.07	3663	0.7379	0.520561	0.369795	-1.28763	0.694033	1.32269	-1.2463	0.265558	0.710914
CLTA	0.876	1991	0.375	-0.7142	3341	0.668	0.9366	1357	0.258	0.9215	1699	0.3343	0.5089	2500	0.5025	-1.16	4354	0.8698	-0.9013	3304	0.666	0.5257	2708	0.5384	-1	3320	0.6737	-2.50382	-1.93637	-1.50571	0.006352	-1.00973	-1.90025	-1.31243	-0.940872
CLTB	1.82	4	0	1.25	710	0.121	0.7674	1807	0.336	1.47	145	0.0328	0.7456	2024	0.3927	0.4485	2845	0.5775	0.8282	1499	0.286	1.36	360	0.0683	0.7752	1222	0.2199	-1.1214	-1.48363	-1.44904	-1.55043	-1.91474	-0.331658	-2.47925	-1.74883
CLTC	-1.11	4129	0.846	-1.43	4681	0.957	1.36	408	0.062	-0.5428	2935	0.5823	1.33	412	0.073	-1.07	4191	0.8338	0.888	1345	0.276	-0.4859	2820	0.559	-1.11	3804	0.7774	-0.683421	-2.26941	-1.48603	1.06957	-1.37138	0.045303	-1.16878	-0.909274
CLTCL1	-1.53	4763	0.976	-1.01	4025	0.823	-0.9179	3400	0.681	0.6728	2497	0.4991	-0.7257	3054	0.6148	-0.6098	3053	0.6197	0.8956	1321	0.259	-1.4	4759	0.9481	-0.9146	2942	0.5907	0.894224	1.12435	1.07611	1.56251	0.992351	1.56465	1.93038	0.866817
CLU	1.46	240	0.031	1.26	669	0.109	1.11	926	0.161	1.34	378	0.0661	-0.5732	2713	0.5423	1.02	1411	0.2731	1.12	844	0.154	-1.39	4741	0.9454	0.8182	1123	0.2223	-1.8366	-0.849695	-1.45971	-0.472345	-1.89492	-1.40229	-1.2013	-0.291918
CLYBL	1.25	772	0.114	-1.09	4186	0.859	1.67	61	0.007	1.23	667	0.1283	-0.9973	3787	0.7662	-0.8675	3706	0.7485	0.4501	2220	0.449	0.929	1682	0.3207	0.653	1485	0.2922	0.291643	-0.428057	-0.11022	-0.359338	-0.380631	0.501432	-1.19691	-0.069308
CMA1	1.03	1506	0.258	1.27	642	0.109	-0.9015	3344	0.671	-1.68	4999	0.9906	-1.7	5028	0.9965	-0.8606	3689	0.7393	-1.23	4396	0.877	-0.872	3640	0.7329	-0.7043	2120	0.4065	1.18463	0.637184	0.783083	1.01144	1.18864	0.253061	0.44865	0.490728
CMAS	-0.8401	3561	0.725	0.8717	2062	0.392	-0.8387	3161	0.632	-0.9528	3873	0.7841	-1.46	4862	0.9659	1.26	563	0.1111	-1.23	4385	0.88	-0.6396	3044	0.6106	-1.24	4328	0.8684	1.43908	1.33614	0.53261	0.751476	1.334	1.0908	1.17867	1.7192
CMBL	1.15	1083	0.177	0.5206	2973	0.581	1.23	680	0.114	0.4904	2802	0.5617	-1.55	4952	0.9835	1.26	567	0.1124	-0.7317	2752	0.558	-1.11	4177	0.8442	-0.6666	2005	0.3995	0.325366	1.03991	-0.05212	-0.374938	0.564021	-0.926252	0.768418	1.21392
CMKLR1	-1.17	4227	0.88	0.7535	2450	0.485	0.7617	1819	0.339	0.8002	2110	0.4111	-1.46	4865	0.9638	1.27	540	0.1085	-1.27	4489	0.892	-1.45	4804	0.959	-1.25	4369	0.8649	-0.251245	-0.795504	-1.12855	-1.02321	0.532386	-0.945032	-0.450666	-0.247872
CNDP1	0.6471	2624	0.508	-0.6073	3140	0.623	-0.5029	2405	0.466	-0.6032	3012	0.6024	1.17	804	0.1548	-0.9829	3995	0.7969	0.6756	1868	0.393	1.23	683	0.1219	0.5944	1579	0.3373	0.098688	-0.334858	-0.230269	0.949626	-0.26206	0.940395	0.126372	-0.786428
CNGA3	-1.21	4276	0.883	1.21	844	0.132	-1.17	4120	0.844	0.8365	1985	0.3935	1	1257	0.2457	1.35	355	0.0643	1.59	91	0.015	1.15	965	0.1771	-0.8418	2635	0.5246	1.50716	-0.167028	-1.00412	0.044955	-1.50316	-0.466417	-0.019259	-0.162965
CNGA4	-0.7957	3453	0.693	-1.83	5020	0.998	1.48	220	0.03	1.26	566	0.1063	-0.9044	3531	0.7193	1.49	110	0.0201	-0.6312	2490	0.502	0.7497	2232	0.4356	-0.9209	2977	0.5958	1.66276	1.20028	0.514179	1.55685	1.16761	1.63463	0.987773	1.80515
CNGB1	-0.5444	2965	0.595	0.981	1665	0.304	-1.1	3948	0.803	-0.726	3265	0.6623	0.6857	2190	0.4339	0.9515	1635	0.3231	0.8884	1344	0.264	-0.8147	3469	0.7005	-1.18	4129	0.8302	0.033587	-0.221624	0.754064	0.783546	-0.023273	0.734661	1.09028	0.446807
CNP	-1.23	4308	0.9	-1.07	4137	0.848	-0.8558	3205	0.64	0.612	2630	0.5275	0.8787	1636	0.3179	-1.69	5015	0.9933	0.8403	1459	0.292	1.15	954	0.174	-0.8637	2731	0.544	-0.275726	0.383857	1.20134	0.555906	0.715437	1.19649	0.717316	0.515235
CNPY3	-0.6187	3083	0.605	0.6799	2654	0.516	0.7612	1823	0.339	-1.27	4537	0.9024	0.7393	2052	0.4062	-0.8739	3724	0.7435	1.12	839	0.162	0.8063	2058	0.4	1.02	672	0.1451	1.15562	-0.025577	0.063363	-0.301188	0.428444	0.429372	0.112304	0.071653
CNPY4	1.11	1222	0.204	1.4	314	0.049	-1.1	3931	0.801	0.9263	1683	0.3195	-0.8205	3311	0.6612	-1.15	4349	0.874	-0.7512	2816	0.556	-0.7363	3271	0.6578	0.4687	1665	0.2991	-0.350574	0.115094	0.207215	1.12713	0.499217	0.916669	-0.063534	0.057617
CNR1	-1.53	4761	0.976	-0.8408	3649	0.737	-1.48	4851	0.974	0.8067	2083	0.4136	1.47	183	0.0317	1.08	1185	0.227	1.4	323	0.055	1.25	618	0.1149	-1.44	4875	0.9695	0.789359	0.332395	-0.288881	0.241085	-0.521062	1.27259	0.482655	0.196782
CNR2	-1.15	4200	0.873	-1.01	4038	0.832	0.9265	1382	0.246	-1.46	4824	0.9613	-0.8213	3313	0.662	-1.49	4854	0.9674	-1	3638	0.728	-0.6948	3166	0.6343	1.35	269	0.0429	0.403335	0.526201	0.764548	1.16745	0.855333	-0.035677	0.75551	-0.305053
CNTF	1.35	492	0.072	1.5	173	0.023	-1.2	4193	0.857	-1.51	4887	0.9717	-1.13	4153	0.8401	-1	4035	0.8135	-1.65	5025	0.995	-0.9642	3859	0.7813	-0.5659	1813	0.3294	0.493962	-0.343361	-0.016366	0.236491	0.807029	-0.059481	-0.189869	-0.998126
CNTFR	1.56	115	0.014	0.7424	2485	0.492	1.29	544	0.088	0.8216	2034	0.3982	-0.8274	3327	0.6658	1.14	950	0.1842	0.8072	1557	0.299	1.04	1323	0.2431	0.9554	814	0.1477	0.537161	-0.057483	-1.27215	-1.21175	-1.29036	-1.05636	-0.414032	-0.240855
CNTN1	-0.5978	3040	0.608	0.9055	1929	0.365	-0.6459	2645	0.518	-1.41	4752	0.9486	-1.01	3845	0.7798	0.8077	2065	0.4177	-1.12	4064	0.813	-0.9221	3766	0.7595	0.67	1458	0.2642	0.650932	0.576343	0.389509	-0.243648	0.491608	-0.819481	0.096303	-0.010294
COASY	-0.8796	3643	0.742	0.6895	2630	0.512	-0.9416	3462	0.697	1.04	1282	0.2511	-0.5121	2629	0.5302	1.34	371	0.0624	0.5405	2142	0.448	-1.19	4339	0.8657	-1.15	3994	0.8166	0.821861	0.686306	-0.52376	0.579238	0.681246	-0.255692	0.835059	1.66433
COL10A1	0.7114	2476	0.472	0.6679	2687	0.523	-1.07	3832	0.774	-1.21	4417	0.8867	-0.8727	3433	0.7014	-1.22	4472	0.8909	-0.9756	3547	0.714	-0.9326	3787	0.7623	-0.7807	2401	0.476	-0.88791	-1.37719	-0.389444	-0.01542	-0.197396	-1.10485	-0.366112	-0.555988
COL11A1	1.11	1212	0.2	0.7605	2429	0.464	0.722	1924	0.361	0.8522	1931	0.3811	-0.8889	3487	0.7102	0.7351	2307	0.4722	-1.09	3942	0.789	0.8637	1874	0.3616	-1.47	4911	0.9749	-0.873786	-0.929835	0.136088	-0.411187	0.477558	0.573503	-0.312215	0.987636
COL11A2	1.04	1440	0.247	0.5201	2976	0.593	0.7496	1856	0.345	0.7887	2141	0.4181	-0.7196	3029	0.5997	0.857	1938	0.3829	-0.6487	2527	0.499	-0.5431	2879	0.5769	1.05	632	0.1134	0.19528	-0.951421	-1.37212	-0.441858	-0.619295	-0.194927	-1.08228	0.351482
COL12A1	0.5714	2770	0.54	-1.84	5022	0.999	1.94	4	0	1.05	1258	0.248	1.01	1230	0.2498	-1.36	4706	0.9334	0.7754	1643	0.34	-0.4762	2814	0.5571	-0.7459	2280	0.4689	0.114132	0.728322	0.239599	0.467675	0.189031	0.396333	0.62932	0.154084
COL13A1	-0.7964	3454	0.7	-0.6096	3143	0.633	-0.6963	2764	0.546	1.06	1224	0.2336	0.9306	1458	0.2781	1.33	394	0.0807	1.23	616	0.108	1.32	438	0.0836	-0.7253	2199	0.4188	0.667263	0.074996	-0.270174	-0.925449	-0.858779	-0.700876	-0.549111	0.013982
COL15A1	-1.53	4764	0.976	-1.12	4234	0.869	0.9591	1300	0.228	-1.55	4918	0.9764	-0.7437	3107	0.6229	-1.13	4312	0.8608	-0.723	2731	0.552	-1.16	4284	0.8641	0.9288	870	0.1711	0.416576	0.229309	0.480191	0.505969	0.611396	-0.477768	0.876125	0.435595
COL16A1	1.05	1434	0.247	-0.9455	3899	0.795	0.8333	1611	0.298	-1.3	4598	0.9129	-0.7609	3153	0.635	-1.33	4654	0.9228	-0.9331	3412	0.686	0.8975	1780	0.3461	1.29	334	0.0679	-0.380673	-0.392498	-0.263802	-0.157812	-0.367648	-1.09828	-1.21239	-0.986785
COL17A1	1.04	1469	0.254	1.3	556	0.088	-0.6831	2737	0.537	-0.4999	2892	0.5766	-0.9898	3766	0.7623	0.902	1798	0.3576	-1.4	4777	0.953	0.9814	1517	0.2874	-1.34	4673	0.9306	-0.222254	-0.191539	0.615629	0.045069	1.00042	0.094829	0.78223	0.425755
COL18A1	-0.7419	3329	0.663	-1.51	4780	0.972	1.36	418	0.064	-1.03	4047	0.8174	0.8611	1700	0.3288	0.5392	2766	0.5615	-1.17	4200	0.844	0.9714	1550	0.2943	-1.29	4499	0.8993	-0.142962	-1.0312	0.242554	0.701295	-0.249287	0.604813	0.216941	0.017471
COL19A1	-1.03	3985	0.821	0.7666	2408	0.46	-1.51	4877	0.978	1.06	1196	0.2371	-1.21	4334	0.8759	1.32	408	0.0684	-1.19	4277	0.866	-1.06	4075	0.8111	-1.19	4149	0.846	-0.438467	0.43462	0.022658	0.39476	1.34576	0.645139	1.27593	0.70504
COL1A1	-1.38	4554	0.943	-1.23	4426	0.908	-0.58	2517	0.49	0.9056	1753	0.3455	-0.4757	2589	0.5207	1.31	425	0.0797	-1.33	4657	0.927	1.12	1040	0.1944	-1.3	4541	0.9048	1.32097	0.350524	0.609132	0.867425	1.17073	1.2285	0.847196	1.64279
COL1A2	1.47	224	0.027	1.13	1149	0.2	-0.675	2719	0.533	-1.09	4192	0.8397	1.51	124	0.0159	0.536	2771	0.5534	1.18	712	0.138	1.02	1399	0.2643	-1.05	3581	0.7319	0.938407	-0.188	0.566131	0.822985	-0.465533	0.440454	0.279378	-0.066975
COL21A1	0.8371	2109	0.396	-1.4	4645	0.952	1.48	214	0.034	0.9789	1496	0.2956	-1.55	4949	0.983	-0.7319	3331	0.6767	-1.46	4867	0.972	0.629	2530	0.5003	-0.6948	2091	0.4146	-0.002725	0.338714	0.709158	-0.190245	1.14065	0.37532	-0.09699	-0.495702
COL22A1	-0.9722	3854	0.792	-1.12	4240	0.87	1.2	720	0.122	-0.5928	3000	0.5981	0.7607	1978	0.3952	-0.7355	3341	0.6717	-0.8442	3101	0.627	1.37	339	0.0542	-0.6343	1925	0.4073	1.11197	0.609078	1.04691	0.625289	1.02822	0.458813	0.31978	0.864958
COL23A1	1.25	770	0.121	0.9702	1691	0.312	0.8502	1576	0.289	-0.5313	2925	0.5778	0.7382	2055	0.3963	-1.28	4578	0.9164	-0.6793	2612	0.515	-0.4732	2812	0.5662	0.9013	933	0.1669	-0.583799	-1.67241	-0.644067	-0.2777	-0.426842	-1.87915	-1.44926	-0.057226
COL24A1	1.15	1082	0.177	-0.7327	3380	0.678	1.38	380	0.058	1.15	914	0.1758	0.7259	2089	0.4111	0.9734	1576	0.3063	-0.6683	2586	0.52	1.22	721	0.1329	-1.47	4914	0.9749	-0.943288	-1.19874	-0.541216	-1.28476	-0.399707	0.895764	-0.531151	-0.027641
COL25A1	-0.891	3673	0.748	-0.6253	3165	0.629	-1.04	3761	0.76	-1.08	4167	0.8438	-1.46	4856	0.9654	1.2	753	0.1481	-1.16	4168	0.84	-1.32	4619	0.9237	-1.04	3530	0.7113	-0.627258	-1.09004	-0.495591	-1.21476	-0.28047	-1.4302	0.171159	-0.791072
COL27A1	0.9376	1791	0.318	0.5745	2906	0.577	1.58	113	0.016	-0.7436	3308	0.6642	-1	3806	0.7718	-0.7189	3294	0.6643	-1.18	4239	0.849	-0.5427	2878	0.5769	-0.7734	2374	0.455	0.226261	0.188661	1.12932	0.013989	1.14546	-0.254703	0.594875	1.33058
COL2A1	0.725	2433	0.478	0.4935	2997	0.597	0.7459	1865	0.347	0.8782	1846	0.357	-0.8656	3414	0.6896	0.7997	2097	0.4235	-1.03	3755	0.747	-1.21	4371	0.8895	-1.24	4323	0.8569	-0.127015	0.130338	-0.339194	-0.296153	0.010681	0.469749	-0.825603	-0.896766
COL3A1	1.65	44	0.005	1.36	405	0.061	-0.6449	2638	0.516	1.16	887	0.1712	1.32	445	0.0834	-1.08	4220	0.8433	1.44	270	0.045	0.8096	2047	0.3977	-0.6254	1911	0.3795	0.488199	0.017341	0.918766	0.511176	-0.363648	1.36282	1.44369	1.27818
COL4A1	-1.54	4786	0.978	-1.66	4936	0.992	0.5671	2250	0.43	-0.4511	2860	0.5716	-1.53	4930	0.9805	1.14	969	0.1897	-1.78	5042	1	-1.54	4919	0.9778	0.6186	1554	0.3049	1.11937	1.9414	1.0815	1.10595	1.83129	-0.079012	1.12262	1.13114
COL4A2	0.6566	2597	0.503	0.9757	1675	0.311	-0.8308	3132	0.625	-0.6228	3046	0.6117	-1.58	4972	0.9881	0.6987	2403	0.4939	-1.33	4640	0.924	-1.38	4725	0.9419	-0.9666	3173	0.6374	-1.4278	-0.337764	-0.479092	-0.624932	0.148558	-0.647644	0.080542	-0.720364
COL4A3	1.04	1439	0.248	1.46	235	0.031	-1.46	4818	0.968	0.7056	2401	0.4805	0.6591	2250	0.4485	-0.7979	3513	0.71	-0.819	3017	0.611	-1.07	4103	0.8286	-0.9088	2919	0.5849	-2.01773	-2.7933	-1.00928	-1.17016	-1.04379	-1.57358	-1.08676	-1.00932
COL4A3BP	-0.6126	3068	0.612	1.78	6	0	-1.53	4906	0.98	1.07	1177	0.225	-0.9656	3703	0.7511	1.22	690	0.1342	-0.6143	2457	0.483	-1.1	4168	0.8481	-0.6514	1965	0.3696	-1.31378	-0.558344	-2.04026	-0.965993	-1.05419	-0.944611	-0.771627	-0.287993
COL4A4	-0.6389	3118	0.613	-0.9142	3821	0.779	0.9224	1397	0.25	1.13	967	0.1861	-0.9049	3534	0.7197	1.16	888	0.1725	-0.9602	3499	0.704	-1.23	4427	0.8909	-1.38	4761	0.9477	-0.859982	-0.935428	-0.930621	-0.448865	-0.122856	-0.469927	-0.288326	0.160226
COL4A5	1.07	1351	0.228	1.33	500	0.08	-1.43	4763	0.954	-0.9441	3849	0.7784	-1.12	4123	0.8351	0.8432	1961	0.393	-1.03	3758	0.748	-1.62	4973	0.9873	-0.9215	2981	0.5833	-1.50658	-0.541633	-1.03903	-0.910742	-0.654501	-1.72879	-0.173523	-1.69189
COL4A6	-0.8694	3613	0.743	0.9424	1786	0.335	-0.7754	2978	0.593	1.04	1298	0.2431	-0.8338	3345	0.6702	1.1	1126	0.213	-0.5814	2401	0.469	-0.9281	3779	0.7623	0.8798	982	0.1752	0.31943	0.143908	-0.825657	-0.275241	-0.176808	-1.40021	-0.848476	-0.116667
COL5A1	-1.13	4174	0.863	0.9268	1843	0.345	-1.32	4543	0.919	-0.8861	3689	0.7505	-0.9291	3606	0.7319	-0.7963	3507	0.7091	-1.56	4976	0.989	-0.671	3105	0.6256	0.7567	1264	0.2504	0.477001	-0.1477	-0.111322	0.683342	1.11738	-0.306373	-0.640375	0.912094
COL5A2	-1.04	4013	0.826	1.17	975	0.163	-1.5	4873	0.978	0.7771	2170	0.4358	-1.12	4122	0.8305	-0.6962	3244	0.6528	-1.18	4241	0.858	-0.6345	3032	0.6053	-0.6512	1964	0.4155	-1.13779	-2.11739	-1.46025	-0.923912	-1.13176	-2.01399	-1.85984	-2.28757
COL5A3	1.62	60	0.006	1.59	69	0.008	1.39	353	0.053	0.9069	1749	0.3449	-0.994	3776	0.7641	-1.16	4369	0.8739	0.7422	1722	0.345	-1.24	4459	0.8954	1.01	693	0.1382	0.603721	1.20647	0.610524	1.28092	0.545817	1.15701	0.955548	0.366606
COL6A1	1.01	1560	0.27	0.5734	2907	0.566	0.9939	1205	0.213	0.9676	1546	0.3026	0.7282	2084	0.4101	-0.5364	2946	0.596	0.9508	1195	0.232	-0.9912	3927	0.7915	-0.6443	1950	0.3881	0.336968	0.153361	0.016026	0.903854	0.361937	0.577533	0.641078	0.098775
COL6A2	-1.11	4138	0.855	0.4143	3025	0.594	-0.6806	2732	0.536	0.6959	2428	0.4867	0.8528	1734	0.3349	1.22	681	0.1332	-0.7125	2708	0.545	0.6755	2416	0.4778	-1.39	4777	0.9505	1.13543	0.82616	0.350686	1.1409	1.02086	1.2975	0.971586	1.29691
COL6A3	1.39	397	0.054	1.16	1037	0.178	1.03	1120	0.199	0.9827	1486	0.2923	-1.44	4823	0.9599	1.05	1306	0.2507	-0.8924	3272	0.659	-1.16	4283	0.8638	0.6876	1427	0.2791	1.05272	0.023818	-0.65715	-0.104333	0.683286	0.204288	0.549333	-0.381965
COL7A1	-0.8011	3470	0.703	-1.05	4112	0.847	0.631	2142	0.41	-1.05	4087	0.8298	1.47	179	0.0354	-0.9374	3876	0.7813	1.7	31	0.007	1.36	353	0.0658	1.58	104	0.0164	1.67864	0.795983	0.408003	0.723601	-0.879388	1.08733	-0.175561	-0.163482
COL8A1	1.01	1565	0.271	1.52	151	0.017	-1.44	4785	0.963	1.42	222	0.0379	-0.7644	3161	0.6341	0.9474	1644	0.3258	0.8067	1558	0.312	-0.6858	3137	0.6271	-1.06	3608	0.7251	-2.12202	-2.93714	-3.23268	-2.29849	-2.71823	-1.73963	-3.25717	-3.1118
COL8A2	0.9447	1768	0.317	1.48	199	0.024	-1.48	4858	0.974	-1.69	5002	0.9932	-1.15	4187	0.8471	-1.43	4786	0.9531	-0.8277	3051	0.616	-1.42	4776	0.9524	1.29	338	0.0572	-0.387307	-1.17101	0.176618	-0.972286	-0.139974	-1.93879	-0.889229	-1.56759
COL9A1	1.44	281	0.038	1.25	730	0.117	0.7636	1813	0.338	-0.8482	3589	0.7307	0.6179	2330	0.4688	-1.29	4591	0.9128	0.8934	1331	0.261	-1.23	4436	0.8925	0.8005	1168	0.2318	-1.34017	-1.49978	-1.11874	-0.529412	-1.85477	-1.32689	-0.806802	-1.0035
COL9A2	0.6436	2632	0.523	-1.38	4625	0.949	1.02	1142	0.203	0.8736	1863	0.3599	-1.73	5035	0.9975	-0.6469	3139	0.6331	-1.28	4517	0.898	-1.25	4461	0.9011	0.9751	771	0.1392	0.51867	1.41652	0.872393	1.00978	1.36744	0.532022	0.0761	-0.331231
COL9A3	-1.37	4534	0.941	0.8801	2026	0.379	-1.28	4432	0.9	-1.25	4483	0.8998	-1.02	3858	0.7791	0.6875	2445	0.5003	-1.34	4674	0.93	-1.01	3970	0.7995	-0.9909	3255	0.6605	0.947811	-0.334528	-0.449592	-1.19051	0.74031	-0.737064	-0.03543	-0.395546
COMP	-1.23	4309	0.9	-0.8444	3657	0.739	-1.06	3795	0.767	-0.9667	3905	0.7906	1.38	313	0.0568	-0.8502	3660	0.7394	1.5	190	0.029	1.41	262	0.0488	1	706	0.1404	1.33279	0.070288	0.613163	0.778022	-0.117738	1.31392	0.228216	0.211904
COMT	1.01	1578	0.271	1.19	916	0.155	0.6312	2139	0.41	1.3	482	0.0847	-1.37	4702	0.9402	0.5935	2691	0.5453	-0.7852	2911	0.589	0.9594	1584	0.3015	1.02	674	0.134	-0.862427	-0.951518	-0.366253	-1.15966	-1.46097	-0.964445	-0.768836	-0.218635
COPA	-1.59	4848	0.985	-1.16	4314	0.884	0.6442	2112	0.399	1.17	848	0.1615	0.3908	2558	0.5154	1.12	1029	0.2002	-0.7632	2851	0.576	-1.09	4147	0.8361	-1.15	3965	0.8011	0.376369	-0.808257	-1.59695	1.5233	1.41728	0.803834	0.697018	1.10816
COPS3	1.13	1139	0.189	0.9286	1836	0.346	1.17	794	0.134	-0.9295	3808	0.77	1.14	892	0.1617	1.31	423	0.087	-0.6901	2642	0.521	1.13	1016	0.1843	-1.31	4579	0.9074	1.67955	1.40662	1.13997	1.42096	1.65383	1.47922	1.63164	2.08788
COPS5	-1.7	4944	0.996	-1.1	4202	0.863	-1.36	4617	0.934	-1.03	4055	0.8192	-1.03	3895	0.785	1.07	1228	0.2373	-1.44	4832	0.965	-0.7322	3261	0.6566	-1.55	5004	0.9899	1.09081	-0.500383	-1.5105	0.784409	1.15514	1.39918	0.148466	-0.121137
COQ2	-1.1	4118	0.85	-0.9408	3887	0.793	-0.7093	2803	0.549	0.8389	1975	0.3912	-1.17	4238	0.8598	0.6587	2527	0.5155	-1.11	4018	0.808	-1.09	4153	0.8396	-1.11	3810	0.7661	-0.818449	0.144809	0.711889	0.043655	1.05124	0.974723	0.84884	0.259962
COQ3	1.29	640	0.091	0.6657	2696	0.524	1.37	399	0.06	0.658	2532	0.5065	-1.56	4957	0.9842	1.19	793	0.1541	-1.37	4723	0.942	-1.52	4897	0.9751	-1.1	3789	0.7622	0.435047	1.29507	0.038237	1.03609	1.59364	-0.158994	1.26201	1.24466
COQ5	-1	3920	0.807	1.27	646	0.103	-1.24	4311	0.879	-1.46	4828	0.9615	0.9136	1518	0.2989	-0.7651	3414	0.6945	-0.7172	2716	0.548	-1.01	3981	0.8024	1.04	651	0.1282	-0.727739	-1.80318	-1.09206	-0.168734	-0.644791	-1.50122	-0.898941	-0.525364
COQ6	-1.05	4017	0.826	0.6485	2748	0.533	-0.9596	3506	0.708	-0.8261	3525	0.7165	-0.634	2820	0.5687	-1.1	4255	0.85	-1.02	3724	0.742	-1.39	4732	0.9429	-0.8774	2785	0.5576	1.3449	0.417634	0.893362	1.32771	1.45267	0.531418	0.509828	1.26271
COQ7	0.9043	1903	0.344	0.6967	2618	0.52	1.06	1031	0.181	-0.9349	3821	0.773	0.5753	2411	0.4758	0.7318	2313	0.4698	-1.06	3853	0.768	1.16	914	0.167	1.07	609	0.1086	1.1512	0.523236	0.339279	-0.015905	-0.111087	-0.01043	-0.928676	-0.897489
COX10	-0.7358	3315	0.666	1.34	469	0.074	-1.1	3939	0.801	1.1	1057	0.2057	-0.5758	2716	0.5433	1.34	382	0.0687	-0.8031	2967	0.6	0.849	1926	0.3723	-0.8838	2810	0.5632	-0.308736	-1.63138	-1.17976	-1.84544	-1.0361	-0.30098	-0.575218	-1.0644
COX15	-1.08	4068	0.839	1.27	648	0.104	-1.34	4577	0.925	1.31	462	0.0824	0.6022	2363	0.4748	1.39	287	0.0492	1.22	630	0.114	1.04	1302	0.2458	-1.23	4303	0.8644	-0.708981	-0.807285	-1.09641	-0.66544	-0.592855	0.286948	-0.248428	-0.258698
COX5A	-1.65	4908	0.99	0.9642	1712	0.317	-1.65	4989	0.995	-1.23	4465	0.9014	1.49	164	0.0314	1.21	732	0.1423	1.04	1009	0.177	0.7083	2348	0.4675	-0.5035	1733	0.3123	-0.674931	-2.37046	-1.59712	-1.25731	-2.27423	-1.89768	-0.823477	-1.58901
COX5B	-0.9885	3895	0.81	-1.55	4832	0.979	1.27	589	0.094	-0.8221	3518	0.7074	-1.43	4811	0.9552	1.3	466	0.0936	-1.09	3959	0.79	0.6017	2596	0.5196	-0.9353	3028	0.5967	-1.16983	-0.433105	0.03126	-0.524841	1.10028	0.734448	-0.156295	0.897773
COX6C	0.916	1863	0.333	1.25	704	0.12	-1.01	3651	0.746	0.7819	2157	0.4222	-1.05	3941	0.7969	0.5654	2741	0.5521	-1.05	3817	0.759	-0.9229	3768	0.7598	0.819	1118	0.2014	-0.447811	-0.346629	-0.565318	0.202783	-0.585681	-1.30869	-0.905465	-0.873215
CP	0.8436	2087	0.385	-0.973	3958	0.809	1.75	28	0.003	0.7707	2195	0.4294	1.07	1089	0.1965	-0.616	3067	0.619	1.13	832	0.146	-0.7885	3401	0.6864	0.8138	1139	0.2042	0.404771	0.650225	0.56059	1.43858	-0.523775	0.746163	0.481265	0.810463
CPA3	0.8674	2019	0.372	0.7446	2483	0.491	-1.03	3721	0.761	1.21	738	0.1398	-1.41	4780	0.9503	1.08	1210	0.2286	-0.7958	2944	0.585	-1.34	4658	0.9337	-1.33	4644	0.9194	-0.408615	0.09568	-0.063481	-0.607628	-0.017582	0.40353	0.276915	0.573447
CPB2	0.8492	2069	0.387	1.14	1075	0.189	-1.11	3961	0.805	-0.9052	3739	0.7556	-0.7443	3111	0.613	-0.6244	3084	0.6228	-0.7533	2825	0.557	-0.8703	3631	0.7318	-0.9932	3264	0.6497	-0.234482	0.189102	-0.434412	0.145845	-0.200445	-0.997762	-0.125546	-0.24827
CPE	0.9331	1806	0.32	-0.9423	3891	0.804	1.48	213	0.034	1.34	375	0.066	0.9102	1531	0.2997	-0.589	3006	0.612	-0.7461	2798	0.566	-0.691	3153	0.6358	0.925	876	0.1729	-0.744595	-0.130978	0.200034	-0.844454	-0.369517	0.391829	-0.486443	-0.516519
CPEB1	-1.06	4042	0.831	-1.21	4401	0.901	0.6716	2043	0.387	-1.38	4709	0.9391	-0.993	3774	0.7595	0.6827	2461	0.4984	-1.63	5018	0.998	-1.29	4555	0.9097	0.7061	1395	0.2946	1.53988	1.22919	1.04119	2.04674	1.76691	0.116119	1.39764	1.34434
CPN1	1.19	952	0.15	0.7135	2582	0.496	1.13	877	0.153	0.6971	2421	0.4857	1.42	252	0.0476	-1.11	4285	0.8552	1.42	288	0.05	1.22	736	0.1345	-0.9378	3038	0.6115	-1.27231	-2.23309	-1.10306	-1.47079	-1.82124	-1.28973	-1.03671	-0.018394
CPN2	-0.9708	3849	0.791	1.01	1560	0.284	-1.39	4706	0.948	0.6742	2489	0.4985	1.27	548	0.1025	0.6782	2474	0.5064	0.9584	1174	0.228	1.24	652	0.1206	-0.9019	2891	0.579	-0.671431	-1.74	-0.732447	-0.714105	-1.36979	-0.015173	-1.11356	-0.682655
CPO	1.02	1533	0.263	1.01	1573	0.285	-0.9689	3540	0.718	-0.8141	3501	0.7029	-1.11	4093	0.8283	-1.01	4058	0.8176	0.6916	1835	0.36	-0.7148	3213	0.6445	-0.955	3117	0.6163	-1.34721	-2.33306	-1.18434	-1.11313	-0.750472	-0.889325	-1.53087	-1.05444
CPS1	1.24	789	0.124	1.33	477	0.077	-0.7656	2952	0.588	0.6096	2636	0.5248	-1.19	4270	0.8663	0.7895	2133	0.4302	0.9242	1260	0.237	-0.9414	3808	0.7688	0.8873	959	0.1722	0.444739	0.008787	0.517259	-0.010948	-0.522299	0.683281	0.494117	-0.015235
CPSF1	-0.7438	3331	0.666	1.28	633	0.091	-1.49	4859	0.976	0.9519	1599	0.3183	0.5138	2495	0.5037	0.7969	2108	0.4323	1.54	135	0.018	-0.635	3033	0.6056	0.8755	991	0.2113	-0.852626	-0.952314	-0.804656	-1.01911	-1.5857	-0.478478	-1.00525	-0.998999
CPSF2	-1.53	4762	0.976	1.09	1280	0.225	-1.41	4737	0.954	0.8893	1811	0.3568	-1.51	4913	0.9771	1.13	1011	0.1967	-1.59	5004	0.992	-1.05	4061	0.8191	-1.3	4551	0.907	-0.845996	-0.646179	-1.75415	-0.964875	0.1324	-0.476837	-1.20214	-0.732049
CPSF3	-1.72	4951	0.994	-0.7646	3463	0.704	-1.39	4689	0.94	1.18	827	0.1544	0.9359	1444	0.2747	1.37	314	0.0632	-1.06	3856	0.768	0.883	1833	0.3489	-1.28	4469	0.884	0.848637	0.423625	-1.02084	-0.043847	-0.07098	0.12009	-0.268015	0.063071
CPSF4	-1.37	4522	0.94	-0.523	3054	0.603	-1.39	4701	0.947	0.7492	2267	0.4515	1.12	959	0.1803	0.7482	2274	0.4629	-0.7265	2739	0.554	1.23	671	0.1246	0.6712	1455	0.2852	-0.542988	-0.581237	1.01315	0.491905	-0.382744	1.73001	-0.168449	0.165454
CPSF6	0.8036	2201	0.421	-1.76	4994	0.995	1.32	487	0.077	1.05	1252	0.2371	1.24	611	0.1172	-1.09	4238	0.8487	1.39	332	0.057	1.14	980	0.1772	1.15	500	0.0833	1.45106	1.47036	-0.178405	1.26561	0.117321	1.20948	0.031668	0.456078
CPT1A	1.51	180	0.02	1.23	780	0.124	0.623	2156	0.408	1.21	728	0.1393	0.8062	1864	0.3647	-0.6584	3167	0.6395	1.68	43	0.004	1.01	1422	0.2709	0.7661	1242	0.2466	-0.232082	-0.388094	-0.138366	-0.832745	-0.742978	-0.677573	-0.858494	0.44364
CPT1B	0.5833	2746	0.536	1.09	1276	0.224	-1.28	4426	0.898	0.6518	2545	0.5098	1.31	465	0.0868	-1.4	4754	0.9453	0.5616	2113	0.427	0.3986	2785	0.5574	1.34	277	0.0497	-0.082824	-0.88647	-0.710712	0.844811	-0.422319	-0.643883	-0.658918	-1.33328
CPT1C	0.8285	2137	0.402	1.45	241	0.035	-1.33	4557	0.921	0.6621	2524	0.4997	-0.5246	2647	0.5219	1.17	861	0.1667	-1.27	4502	0.895	1.16	931	0.1716	-1.48	4926	0.9717	-0.040704	-0.570613	-0.679356	0.031163	0.329703	0.757644	-0.80389	-0.324471
CPT2	1.16	1044	0.17	0.7748	2380	0.456	0.706	1968	0.369	0.753	2252	0.4495	1.17	826	0.1585	1.04	1338	0.256	0.6169	2010	0.407	1.1	1126	0.2098	-1.32	4592	0.9169	-0.072567	-0.116625	-0.481816	-0.639261	-0.390178	-0.118169	-0.090302	0.12218
CR1	1.38	402	0.055	0.5912	2875	0.56	1.68	59	0.007	-0.9076	3751	0.7615	-1.16	4225	0.8545	0.5073	2800	0.5685	-0.6971	2656	0.535	-1.77	5035	0.9979	-0.7359	2235	0.4434	-0.461755	-0.740291	-0.959137	0.312396	-0.320241	-0.956016	0.192943	-0.30339
CR2	0.8753	1993	0.363	-0.5209	3052	0.603	0.8638	1547	0.283	1.11	1023	0.1992	0.7417	2043	0.4022	1.45	153	0.028	0.6454	1940	0.394	-0.8702	3630	0.7296	-1.18	4120	0.8284	-0.643438	-0.818386	-1.34268	-0.29597	0.144157	1.00525	0.327454	-0.410685
CRADD	0.7089	2487	0.473	1.53	144	0.015	-1.43	4778	0.962	0.6883	2443	0.4908	0.7197	2106	0.415	0.8814	1867	0.3702	-0.6678	2584	0.52	1.17	899	0.1653	-1.22	4252	0.856	-0.02285	-0.76876	-0.638033	-0.537967	-0.440458	0.217122	-0.056644	0.761874
CRAT	1.42	313	0.045	-0.6702	3244	0.656	1.51	191	0.029	-1.58	4942	0.9802	-1.24	4407	0.8911	1.12	1054	0.2024	-1.54	4952	0.983	-1.22	4408	0.8936	0.9969	725	0.133	0.91701	0.313814	-0.495051	-0.248967	0.740766	-0.38597	0.382084	-0.208947
CREB1	-1.22	4293	0.899	-1.37	4612	0.948	-0.956	3502	0.709	-1.42	4766	0.9502	1.2	723	0.1365	0.5238	2786	0.565	-1.04	3788	0.754	0.9304	1678	0.3157	0.8142	1138	0.2039	1.06715	0.578897	0.837591	0.539711	0.597386	1.31216	0.414127	1.07576
CREB3	-1.31	4444	0.922	-0.794	3522	0.712	-1.46	4816	0.967	1.22	699	0.1349	1	1258	0.2458	1.28	513	0.0993	1.1	887	0.16	1.17	886	0.1621	-1.19	4165	0.8383	-0.483645	-0.915426	-0.422326	-1.27396	-0.888152	1.25528	-0.931357	0.398311
CREB3L1	-0.6912	3218	0.638	-0.9426	3893	0.794	-0.7556	2927	0.579	0.7267	2344	0.4663	-1.43	4809	0.9573	1.4	259	0.0445	-1.09	3948	0.79	-0.9531	3830	0.7731	-0.8396	2626	0.5229	1.13441	0.208849	-0.838866	0.170746	0.065943	-0.100762	-0.401569	0.127012
CREB3L2	-1.25	4338	0.905	-1.24	4442	0.91	1	1177	0.21	0.584	2679	0.539	-1.69	5023	0.9973	1.27	526	0.1047	-1.27	4495	0.898	-1.42	4773	0.9517	0.7836	1206	0.2386	-0.113057	-0.164752	-1.85739	-1.48945	0.005197	-0.493951	-0.285526	-1.58801
CREB3L3	-1.7	4939	0.993	-1.78	5003	0.996	1.41	322	0.05	0.9088	1744	0.3437	1.75	9	0.0004	0.8707	1907	0.3773	1.78	13	0.001	1.2	790	0.1442	0.7862	1198	0.2378	1.38916	0.584941	0.390791	1.26617	-0.574507	1.36597	0.752852	0.545705
CREB5	1.1	1258	0.209	1.23	791	0.126	-1.08	3857	0.781	1.08	1132	0.2207	0.9914	1288	0.253	-0.6911	3231	0.6541	0.9495	1197	0.232	1.14	996	0.1842	1.55	132	0.0224	0.561237	0.173173	0.002241	0.024586	-0.692073	0.07049	0.031282	0.020071
CREBBP	-1.04	4008	0.825	-1.52	4787	0.972	1.06	1043	0.183	-0.8131	3497	0.7083	-1.32	4595	0.9212	-0.9718	3969	0.7968	-0.6387	2507	0.505	-1.6	4961	0.9859	1.19	450	0.0802	0.187659	0.805639	0.201019	1.829	1.06989	0.008875	1.46666	0.20713
CREM	0.7922	2228	0.419	1.64	43	0.004	-1.53	4903	0.984	1.1	1066	0.208	-0.5802	2729	0.5445	1.15	921	0.1778	-0.8731	3197	0.644	-1.38	4716	0.9413	-1.17	4083	0.8218	-1.4328	-1.5379	-1.66318	-0.931035	-1.33136	-0.872226	-0.504473	-1.13026
CRH	-0.595	3034	0.607	-1.08	4173	0.86	1.02	1143	0.203	0.6675	2508	0.4973	-0.6758	2914	0.5783	-0.8123	3555	0.7131	-0.4821	2285	0.444	-0.6716	3106	0.6233	-0.6555	1974	0.3726	1.39497	1.58854	1.34	1.01401	1.18821	0.999629	1.19842	1.62642
CRHBP	-1.17	4224	0.879	-1.58	4857	0.982	-1.13	3998	0.811	-1.64	4980	0.9883	0.6414	2287	0.4564	-0.7778	3456	0.7003	-0.6834	2631	0.528	-0.9697	3875	0.7818	-0.7855	2414	0.4801	1.07978	-0.376466	-0.545294	0.453687	0.657659	-0.623402	0.558779	-0.206894
CRHR1	-1.63	4890	0.991	-1.14	4278	0.877	-0.6508	2653	0.519	-0.7614	3355	0.6775	1.07	1085	0.214	0.773	2200	0.4495	-0.8249	3039	0.614	0.8962	1789	0.3467	-1.02	3406	0.7008	1.2063	1.28617	1.32158	1.41436	0.578514	1.35712	1.1636	1.00285
CRHR2	0.7272	2427	0.477	-1.4	4641	0.952	1.4	348	0.055	0.9159	1722	0.3383	-1.24	4409	0.8885	1.06	1274	0.2447	-1.31	4601	0.917	-0.9687	3870	0.781	-0.8851	2817	0.5644	0.114146	0.934123	0.234777	0.654419	1.31942	1.06469	1.02437	1.37952
CRK	-1.18	4241	0.882	-0.729	3371	0.676	-1.21	4222	0.861	0.6783	2473	0.4967	1.52	116	0.019	-1.38	4739	0.9423	1.36	377	0.066	0.9981	1462	0.2787	-0.831	2589	0.5153	1.16307	1.27041	1.46448	1.30822	1.08391	1.5876	1.56822	1.655
CRKL	1.04	1448	0.25	1.32	502	0.076	-1.43	4776	0.962	1.41	243	0.0427	-1.09	4043	0.8175	1.15	929	0.1805	1.24	589	0.107	0.7815	2142	0.416	1.03	670	0.1336	-0.424088	-0.22252	-0.689741	-0.531026	-0.461785	-0.217636	-0.176346	-0.845416
CRLF2	1.44	267	0.036	1.65	38	0.004	-0.8769	3267	0.655	0.8375	1983	0.3924	1.02	1199	0.2337	-1.3	4612	0.916	1.26	559	0.099	1.16	933	0.172	0.7027	1401	0.2734	-1.09627	-1.53754	-1.27171	-1.13955	-1.49694	-1.63306	-1.26257	-1.15491
CRLS1	-1.27	4376	0.904	0.7989	2300	0.445	-1.3	4483	0.913	1.14	960	0.1848	0.8853	1611	0.3137	0.7474	2275	0.4634	0.9266	1253	0.244	1.39	294	0.0546	-0.8196	2545	0.5063	0.774695	-0.4526	-0.421041	-0.249877	-0.031454	0.21727	-0.792844	-0.308555
CRP	1.05	1428	0.246	1.11	1203	0.21	-0.798	3042	0.604	0.843	1960	0.3878	1.2	712	0.141	1.38	301	0.0526	0.8532	1424	0.285	1.47	169	0.0283	-1.19	4147	0.8348	-0.238381	-1.00277	-0.599457	-0.746577	-0.812173	-0.43381	-1.13804	-0.070543
CRTAM	1.29	638	0.091	1.52	150	0.016	0.7562	1832	0.342	1.04	1276	0.2504	0.9757	1329	0.2716	0.9213	1739	0.3488	1.13	830	0.161	0.9851	1508	0.2868	-1.2	4192	0.8557	-0.673777	-1.67877	-1.33359	-0.535289	-1.53467	0.104164	-1.16477	-0.571085
CRTC1	0.8533	2055	0.378	1.44	256	0.036	-1.15	4072	0.826	1.38	286	0.0511	-0.5154	2632	0.5286	1.65	17	0.0017	1.08	937	0.173	1.17	901	0.1658	-1.34	4661	0.9299	-0.462918	-1.75274	-1.65054	-1.12885	-1.12855	-0.039094	-0.265996	-0.485831
CRY1	0.8963	1923	0.351	0.7868	2331	0.448	1.05	1061	0.188	0.9601	1571	0.2942	1	1264	0.2365	1.45	155	0.0361	1.09	920	0.16	1.5	137	0.0221	-1.05	3540	0.7007	1.09687	0.441089	0.984389	-0.109303	-0.201039	0.911614	0.753946	0.883046
CRY2	1.15	1091	0.179	0.8711	2063	0.386	-1.12	3978	0.804	-0.8364	3557	0.7234	-0.6431	2839	0.5726	-0.9345	3868	0.7802	-0.9036	3310	0.667	-1.54	4921	0.978	-0.9524	3109	0.6249	0.73431	0.549091	0.529374	1.27757	0.916704	0.900629	1.20744	0.565871
CRYAB	-0.5298	2955	0.591	0.8265	2206	0.427	1.08	975	0.17	-1	3989	0.8072	-0.4703	2587	0.5127	0.5379	2769	0.5609	-0.7294	2747	0.544	1.15	970	0.1759	-0.8419	2636	0.5126	0.992412	0.815594	0.829772	0.624305	0.875825	0.790015	0.617442	0.293683
CS	0.9995	1607	0.28	0.9446	1782	0.333	-1.14	4049	0.82	0.7983	2116	0.4176	-1.59	4978	0.997	1.64	19	-0.0001	-1.29	4547	0.929	-0.8311	3512	0.6868	-1.01	3353	0.6968	-0.351273	-1.23649	-1.57225	-1.2255	-0.999613	-0.675677	-0.543886	-0.924084
CSAD	0.9774	1684	0.295	1.21	857	0.138	-1.27	4415	0.896	-0.7197	3251	0.6588	0.6227	2322	0.466	-1.35	4684	0.9302	-1.02	3726	0.742	1.29	514	0.0933	1.28	350	0.0588	-0.19314	-0.746845	-0.102444	-0.067466	-0.279122	-0.723252	-1.135	0.420305
CSDA	1.02	1543	0.264	-1.12	4250	0.874	0.741	1875	0.35	1.33	394	0.0787	-0.8173	3298	0.6592	1.11	1078	0.2054	0.5637	2109	0.412	-0.7229	3240	0.6503	-0.9912	3256	0.6476	0.108388	-0.038884	-0.285362	0.308236	-0.257714	0.351085	0.124792	1.04236
CSE1L	0.7831	2262	0.434	0.5473	2949	0.587	-0.9231	3416	0.685	-1.18	4374	0.8727	0.5525	2446	0.4932	-0.5887	3005	0.6078	-0.6325	2493	0.516	-0.4499	2796	0.554	0.913	908	0.1922	-1.01114	-2.26459	-2.90401	-1.61002	-2.12791	-2.11164	-2.19434	-1.60379
CSF1	-0.7968	3455	0.701	-0.7865	3506	0.715	0.8332	1612	0.299	0.8826	1834	0.3608	-0.6837	2939	0.5922	0.7566	2249	0.4575	-0.6794	2614	0.526	0.8662	1871	0.3601	0.8845	973	0.19	-0.117151	-0.088449	-0.345892	0.352073	-0.10606	1.38528	-0.512624	0.224059
CSF1R	-0.5632	2988	0.6	0.697	2617	0.519	-0.8705	3251	0.652	-0.4425	2855	0.567	1.22	679	0.1299	-0.8038	3531	0.7088	-0.7351	2764	0.548	0.606	2583	0.5182	0.9491	826	0.1497	0.417139	-0.710561	-0.750162	0.296413	0.030632	0.374938	-0.550124	0.247399
CSF2	-0.4969	2932	0.586	0.4744	3007	0.601	-1.07	3833	0.781	-1.15	4305	0.8653	1.23	654	0.1271	-1.15	4353	0.8698	0.5642	2106	0.426	1.39	285	0.0536	0.502	1656	0.3253	0.386054	-0.596944	0.270342	0.423364	0.106184	1.24685	-0.779009	-0.856384
CSF2RA	-1.32	4464	0.925	-0.9846	3984	0.814	-1.22	4266	0.869	0.4816	2810	0.5628	-1.23	4383	0.8854	0.932	1701	0.3364	-0.9891	3600	0.721	-0.8963	3706	0.745	-1.16	4029	0.8133	-1.23942	-1.53475	-1.10637	-1.89423	-0.703561	-1.12933	-0.528369	-1.66369
CSF2RB	-0.8997	3697	0.761	-1.33	4560	0.938	1.12	887	0.152	-1.5	4872	0.9692	-1.3	4549	0.9146	0.8758	1888	0.3701	-1.46	4857	0.967	-1.13	4231	0.8596	-1.09	3727	0.7371	-0.137557	-0.880016	-0.657424	-0.952472	0.250027	-0.529713	0.153159	0.342565
CSF3	1.18	962	0.159	1.25	717	0.123	0.6156	2166	0.416	1.04	1307	0.2545	-1.22	4343	0.8786	-0.7105	3274	0.6659	-0.8511	3119	0.63	-0.988	3919	0.7904	-1.01	3369	0.6846	-1.58337	-0.163338	-0.857429	-0.112128	0.249829	-0.045214	-0.630816	-0.487167
CSF3R	-1.97	5034	1	-1.69	4959	0.991	0.75	1853	0.345	-0.9791	3930	0.7955	-1.11	4094	0.8285	-1.11	4273	0.8573	-1.18	4224	0.845	-0.5075	2838	0.5703	1.01	687	0.1274	1.52734	1.17215	0.715607	1.27102	1.33507	0.484956	-0.042204	1.11619
CSGLCA-T	1.06	1407	0.243	1.07	1337	0.237	0.8043	1707	0.313	1.12	996	0.1952	-0.7309	3066	0.6189	-0.8852	3756	0.749	1.13	822	0.159	0.8422	1946	0.3803	0.953	819	0.1749	-0.4865	-0.638806	-1.37391	-0.930374	-1.32573	-0.539891	-0.826329	-0.973583
CSK	0.8641	2030	0.375	-0.5385	3070	0.619	1.12	894	0.154	1.07	1164	0.2276	1.3	484	0.0891	-0.8824	3745	0.7552	1.69	40	0.004	0.7272	2292	0.4484	-0.627	1914	0.3804	0.79573	0.732421	0.649643	1.70202	-0.246261	1.55109	1.46703	1.45071
CSMD1	0.9236	1843	0.331	1.05	1413	0.254	-0.59	2538	0.493	1.05	1246	0.2447	0.8866	1608	0.3126	1.2	759	0.1492	0.8828	1355	0.268	0.9837	1512	0.2863	0.8183	1121	0.2223	-0.743694	0.270274	-1.00999	0.083966	-1.06089	-2.25617	0.03933	-0.819314
CSNK1A1	-1.6	4861	0.987	0.6288	2803	0.544	-1.55	4924	0.986	1.13	963	0.185	-1.33	4619	0.9259	1.56	52	0.0099	-1.07	3872	0.773	0.6797	2404	0.4754	-1.29	4506	0.9003	1.18708	0.719309	-0.245338	-0.053031	0.977865	0.479047	0.235323	-0.025761
CSNK1A1L	-1.47	4693	0.966	-1.29	4507	0.915	-0.7658	2955	0.6	-0.4807	2872	0.5689	-1	3809	0.764	0.6019	2663	0.5318	-1.3	4570	0.92	1.13	1028	0.188	-0.6324	1923	0.4064	0.604161	0.373501	0.249795	0.294619	0.353746	0.957053	-0.798969	-0.268128
CSNK1D	-0.758	3360	0.679	1.32	511	0.083	-1.19	4181	0.854	-1.3	4604	0.9215	-0.5115	2627	0.5197	1.4	252	0.0522	-1.58	4989	0.989	-1.41	4767	0.9492	-0.8326	2597	0.5043	1.72183	1.25909	0.553406	1.65051	1.70871	1.09384	1.49329	1.30336
CSNK1E	0.9856	1654	0.289	0.7467	2475	0.473	0.9967	1195	0.212	0.7211	2360	0.4702	-0.5816	2733	0.5448	-1.34	4681	0.9301	0.6954	1824	0.37	0.7111	2335	0.4566	1.25	385	0.0658	-0.338576	0.107019	0.770468	0.883691	0.066002	0.324683	-0.173028	0.011602
CSNK1G1	-0.5859	3018	0.593	0.8956	1974	0.368	-1.13	4009	0.815	-1.43	4779	0.9534	0.6962	2164	0.4286	1.18	835	0.1608	-1.48	4881	0.975	-1.19	4344	0.876	-0.9153	2945	0.5913	0.998365	0.144636	-0.271726	0.976948	0.991044	0.547846	0.900802	-1.35682
CSNK1G2	1.12	1174	0.197	-1.02	4059	0.835	1.47	249	0.037	-0.7125	3233	0.6479	-0.7613	3154	0.6235	-1.09	4244	0.8499	-0.7598	2839	0.561	-0.7087	3202	0.6413	-0.9422	3056	0.6046	1.85983	2.13494	1.716	1.93181	1.55028	1.51846	1.38303	1.69632
CSNK1G3	1.01	1574	0.274	-0.7155	3343	0.671	0.9507	1323	0.234	1.19	792	0.1507	-1.03	3890	0.7847	1.08	1203	0.2315	-0.7361	2768	0.56	1.25	612	0.1134	-1.43	4858	0.9653	-1.80693	-2.17476	-1.06605	-1.86158	-1.27054	-1.04868	-1.47721	-1.0306
CSNK2A1	1.32	560	0.079	1.08	1325	0.235	1.27	587	0.096	0.7614	2230	0.4435	-0.5017	2617	0.5259	-0.8356	3625	0.7323	1.05	997	0.186	0.7432	2251	0.4396	1.17	466	0.0835	1.07034	1.17997	1.11627	1.39914	1.11054	1.31884	1.45886	1.06961
CSNK2A2	1.12	1210	0.195	-0.9997	4013	0.816	0.9479	1329	0.25	-1.02	4036	0.8135	0.5914	2384	0.4803	-0.7016	3261	0.6553	-0.7966	2946	0.598	0.3749	2787	0.551	-0.7778	2392	0.4925	0.916017	0.971228	0.970791	1.00276	0.855641	-0.210818	1.29308	1.54229
CSNK2B	0.7495	2364	0.461	-0.7885	3511	0.716	1.08	978	0.171	-0.8761	3658	0.7395	-0.8831	3466	0.6997	1.17	874	0.1692	-1.03	3744	0.746	0.9602	1580	0.2959	-0.7632	2335	0.4467	1.90036	-0.458498	-0.251559	0.215211	0.974591	-0.183499	-0.68483	0.777654
CSRP1	1.04	1462	0.251	1.16	1030	0.181	-1.24	4304	0.878	1.43	203	0.0359	0.9007	1560	0.3054	0.6876	2444	0.5002	0.9532	1188	0.23	1.12	1044	0.1955	-1.22	4258	0.8566	-1.61511	-0.801226	0.158585	-1.01745	-0.285546	1.16105	-0.307425	0.143522
CSRP3	-0.9196	3754	0.764	-1.04	4090	0.838	0.8214	1649	0.304	0.8387	1977	0.3914	0.9985	1272	0.2479	-0.687	3225	0.6522	-1.5	4922	0.98	-0.4207	2790	0.5591	-1.13	3900	0.7847	-0.490815	-1.55001	-0.159077	-0.082491	-0.134891	-0.351478	-0.14457	0.144477
CST3	-0.7855	3426	0.695	0.8232	2219	0.43	-1.09	3905	0.794	0.9472	1624	0.3041	0.571	2422	0.4776	0.9595	1620	0.3066	1.38	347	0.059	1.04	1334	0.245	1.77	32	0.0044	-0.313123	-1.52905	-1.41477	-1.66475	-1.75025	-1.28288	-1.61174	-1.29578
CSTF1	1.25	781	0.115	-1.18	4351	0.893	1.27	591	0.097	-1.24	4466	0.8953	1.3	489	0.0903	-1.18	4393	0.8768	0.4234	2231	0.45	1.2	779	0.1415	0.9017	931	0.183	0.768312	0.149407	0.94256	1.30559	0.14	0.438121	-0.669585	-0.191486
CSTF2	-0.697	3228	0.641	0.5638	2921	0.569	-0.9318	3431	0.692	1.02	1365	0.2678	1.73	12	0.0005	-1.28	4585	0.9112	1.38	340	0.06	-0.8415	3540	0.7141	1.07	603	0.1177	0.954393	0.621491	0.451735	1.26266	-7.6e-05	0.64018	0.667355	0.64007
CSTF2T	0.7816	2265	0.426	0.9335	1821	0.34	-0.7302	2860	0.562	1.28	525	0.0947	0.9885	1296	0.255	1.04	1354	0.2586	0.8176	1534	0.307	1.06	1246	0.2333	-0.9995	3298	0.67	-0.845575	-0.781307	-0.775818	-0.534851	-0.968831	-0.166941	0.478292	-0.492703
CSTF3	0.898	1919	0.349	0.6122	2836	0.553	0.7922	1739	0.319	1.42	224	0.0381	0.8815	1623	0.3166	-1.27	4560	0.9077	1.17	729	0.135	-0.9462	3818	0.7693	-0.7011	2114	0.4187	-1.08133	-1.54921	-0.445335	0.49628	-0.904344	0.187447	-0.744859	-0.148765
CTBP1	-1.35	4510	0.935	0.6516	2740	0.531	-1.07	3852	0.779	-1.18	4367	0.8752	1.7	20	0.0015	-0.7507	3380	0.6864	0.9942	1104	0.211	1.51	134	0.0212	-0.9505	3099	0.623	1.22139	0.045007	0.773481	0.313411	0.084196	0.070789	0.298739	-0.397506
CTBP2	0.7231	2437	0.479	0.7139	2577	0.51	0.7984	1721	0.319	0.8974	1794	0.3405	-1.1	4069	0.8247	-1.32	4641	0.9268	0.7844	1616	0.31	-1.5	4862	0.9676	1.24	397	0.0645	-0.770621	0.715835	0.504977	-0.000705	-0.220152	0.775272	-0.071519	-0.635338
CTBS	-0.9263	3767	0.777	0.633	2794	0.554	-1.21	4228	0.865	1.07	1187	0.227	-0.9088	3542	0.7178	0.9894	1514	0.2861	-0.9572	3489	0.698	1.19	833	0.1518	-1.31	4567	0.9044	0.222396	-0.772716	-0.269367	-0.682076	0.243614	0.717628	0.129748	-0.002172
CTCF	0.7537	2353	0.445	-1.2	4384	0.897	1.01	1151	0.207	0.9899	1467	0.2899	1.13	917	0.1764	0.5209	2788	0.5569	1.35	396	0.073	1.24	651	0.1152	0.8412	1072	0.2275	1.32165	0.889812	0.488914	0.559065	0.181134	1.55921	0.344254	0.922002
CTF1	0.8565	2048	0.376	1.29	597	0.095	-1.34	4584	0.927	0.654	2540	0.5047	1.14	883	0.1707	1.21	728	0.1368	-0.6776	2606	0.536	1.54	91	0.009	-1.21	4217	0.8596	1.29264	-0.102538	0.159326	-0.144903	0.415769	0.786602	0.448073	1.1384
CTGF	-1.5	4721	0.969	-0.9542	3917	0.8	-1.23	4289	0.876	0.5524	2723	0.5489	1.41	260	0.0493	-1.21	4454	0.8887	1.67	51	0.005	0.9751	1534	0.2916	1.2	440	0.0783	0.153782	0.659432	0.546303	0.401718	-0.818481	0.363231	0.846866	0.47202
CTH	-1.02	3961	0.816	0.8936	1983	0.369	-0.935	3439	0.693	0.6548	2535	0.5083	1.31	457	0.0851	0.7528	2256	0.4596	0.5852	2067	0.418	0.9286	1685	0.3209	-1.17	4072	0.8201	-2.76733	-0.39321	-0.455899	-0.045255	-0.547866	0.514925	0.019413	-0.124557
CTLA4	-1.74	4959	0.997	-1.16	4315	0.884	-1.27	4388	0.892	1.09	1093	0.2154	-1.31	4571	0.9179	0.781	2171	0.4389	-1.46	4868	0.972	-0.8933	3698	0.7429	-1.53	4987	0.9877	1.07632	1.72807	1.35083	1.59183	1.39559	1.75253	1.40313	1.96845
CTNNA1	0.6793	2562	0.49	-0.9109	3813	0.776	1.06	1018	0.179	0.8221	2033	0.4061	-1.21	4324	0.8741	0.5838	2707	0.5388	-0.9655	3515	0.71	0.8036	2067	0.401	-0.7996	2462	0.5088	-0.884179	-1.28351	-1.19712	-2.11266	-1.25471	-0.840095	-1.75288	-0.974728
CTNNA2	-1.49	4709	0.966	0.8377	2165	0.41	-1.38	4674	0.942	-0.6674	3139	0.6329	0.7094	2127	0.4217	-1.15	4351	0.8698	-1.25	4452	0.891	0.8085	2051	0.3984	-1.1	3777	0.7601	0.767517	-0.338508	0.146183	0.656749	0.956136	0.942855	0.347135	1.2156
CTNNA3	1.12	1193	0.198	0.8181	2238	0.424	-0.6053	2558	0.498	-1.35	4673	0.9339	-1.31	4560	0.9165	-0.5946	3016	0.6113	-1.34	4687	0.929	-1.07	4096	0.8345	0.7425	1307	0.2344	0.802651	0.633497	0.93533	0.908727	1.56998	0.971878	1.02592	-0.196636
CTNNAL1	0.8684	2015	0.372	-0.7627	3456	0.703	1.29	539	0.087	0.707	2396	0.4793	-1.02	3864	0.7804	1.09	1159	0.2217	0.7744	1646	0.328	-1.13	4234	0.8551	-1	3313	0.6724	-0.593319	0.080462	-0.380114	-0.362465	0.017657	-0.471819	0.712858	0.228576
CTNNB1	-1.47	4687	0.963	1.09	1274	0.223	-1.69	5007	0.997	-0.6109	3030	0.5833	0.7444	2029	0.393	-0.9861	4001	0.7771	-0.9019	3305	0.655	-0.626	3017	0.5844	-1.31	4562	0.9339	-0.003343	-1.46252	0.695288	0.591168	-0.23031	-0.560868	-0.12125	0.585144
CTNNBIP1	-0.7156	3281	0.65	-0.7176	3349	0.671	-1.05	3781	0.765	1.24	619	0.117	1.01	1242	0.242	0.9728	1580	0.3071	0.9509	1194	0.232	1.09	1156	0.2155	-1.08	3689	0.743	-0.515111	-0.564905	-0.825016	-0.43472	-0.835918	0.786905	-0.46804	0.644561
CTNND1	0.7052	2497	0.475	-1.15	4297	0.882	0.9275	1379	0.247	0.5725	2696	0.5341	1.3	483	0.0857	-1.26	4548	0.9014	0.8719	1382	0.284	1.37	321	0.052	0.5341	1639	0.3511	-0.259551	-1.29077	-0.104993	-0.720115	-0.784444	-0.849325	-1.16214	0.271816
CTPS	-0.5334	2958	0.592	0.7039	2598	0.516	0.5762	2238	0.43	1.4	250	0.0509	1.14	916	0.1657	1.3	455	0.0917	0.6964	1820	0.357	1.46	190	0.0342	-1.21	4223	0.8376	-0.000891	0.103203	-0.391957	-0.218383	-0.515061	1.1764	0.632589	0.600383
CTPS2	-1.04	3995	0.828	-1.07	4138	0.853	0.6713	2044	0.391	1.41	246	0.043	-0.7924	3236	0.65	-0.561	2977	0.6021	0.7313	1743	0.351	0.9421	1644	0.3135	-0.8225	2556	0.5084	-0.550555	-0.384025	0.942137	0.072145	-0.018653	0.035816	-0.00131	0.77075
CTSA	-1.09	4087	0.844	-0.5925	3118	0.618	-1.02	3692	0.744	0.9051	1756	0.346	0.6621	2242	0.4464	0.8902	1835	0.3645	0.933	1232	0.24	0.7824	2139	0.4154	0.9784	764	0.15	0.83053	0.39153	-0.804238	0.638412	-0.55798	0.64297	-0.465021	-0.638231
CTSB	0.7794	2277	0.427	0.6419	2768	0.536	-1.03	3716	0.748	0.8526	1928	0.381	1.19	756	0.1488	-1.61	4976	0.9851	0.8971	1318	0.259	0.8367	1961	0.3824	1.13	518	0.0969	1.3717	1.27437	0.983525	1.17564	0.738672	0.891513	0.657666	1.05803
CTSD	0.7125	2473	0.486	1.01	1555	0.282	-1.19	4165	0.85	-1.02	4018	0.8144	0.9901	1294	0.2429	0.7647	2225	0.4455	-0.5735	2385	0.467	1.12	1043	0.191	-0.763	2332	0.4466	1.75757	0.113471	0.570509	0.585442	0.646002	1.25979	0.704193	0.664563
CTSE	0.9237	1842	0.328	-0.8887	3764	0.775	-0.6744	2718	0.534	1.73	7	0.0021	1.53	110	0.0249	-0.9563	3920	0.7913	1.72	24	0.005	1.37	341	0.064	-0.7476	2282	0.4338	0.310846	0.19668	0.395768	1.06374	-1.4468	0.993361	0.781241	0.532863
CTSG	0.6838	2557	0.502	0.9952	1613	0.294	-1.01	3665	0.749	0.9749	1517	0.2839	1.29	494	0.0939	0.7215	2347	0.478	0.7088	1784	0.351	1.39	293	0.056	0.8174	1125	0.2025	0.567318	-0.868367	-1.25435	-0.189437	-0.752536	1.32735	-1.29577	-0.402126
CTSK	1.57	103	0.014	-0.7097	3331	0.675	0.9796	1247	0.22	0.9513	1601	0.3014	1	1262	0.2365	1.04	1355	0.2514	-1.13	4094	0.818	1.07	1233	0.226	-1.07	3664	0.7256	0.513911	0.628292	0.429102	-0.437651	0.266463	1.19055	0.488611	1.206
CTSL1	1.17	997	0.16	1.17	983	0.166	-0.7386	2880	0.567	-0.6313	3069	0.6159	1.11	985	0.186	-0.7944	3502	0.7085	0.8187	1530	0.306	1.18	843	0.1533	-0.7217	2189	0.4329	-0.018706	-1.75775	-1.04041	-0.697069	-0.70959	0.678946	-1.26516	-0.254508
CTSL2	1.32	569	0.085	-0.9569	3925	0.811	0.8728	1526	0.275	-1.13	4263	0.8623	1.2	725	0.1368	-0.9009	3790	0.7616	-0.8849	3249	0.645	-0.7962	3419	0.6906	-0.4907	1719	0.31	0.540127	0.311267	0.606444	0.665291	0.6469	1.60993	1.24546	0.857395
CTSS	-0.5154	2943	0.588	-1.29	4506	0.927	1.3	528	0.086	0.9782	1500	0.296	-0.747	3120	0.6247	1.2	756	0.1482	0.6033	2040	0.412	-0.9866	3915	0.7899	-0.9129	2934	0.5891	1.55918	1.70119	1.05387	1.54666	1.32481	1.53155	1.82215	1.59705
CTTN	1.54	136	0.018	0.72	2560	0.506	1.24	657	0.105	1	1421	0.2662	1.38	317	0.0632	-1.37	4717	0.9402	1.5	191	0.032	1.1	1138	0.2088	0.8924	948	0.1701	-0.76807	-1.38213	-0.567257	-0.073277	-1.47505	-0.296762	-1.71074	-0.816801
CUGBP1	0.4726	2875	0.563	0.7138	2578	0.496	1.21	705	0.118	-1.53	4905	0.9739	-1.37	4693	0.9386	-0.8328	3615	0.7302	-1.38	4733	0.945	-0.8889	3685	0.7399	-0.5063	1736	0.3393	-0.860473	-1.4594	0.102974	-1.67411	-0.449542	-1.50556	-0.553815	-0.692097
CUGBP2	0.7877	2247	0.422	-1.65	4927	0.991	1.52	176	0.022	1.46	160	0.0286	0.7541	1997	0.3937	1.01	1450	0.2813	1.25	573	0.102	0.6494	2483	0.4914	-0.8482	2661	0.5312	-0.041037	-0.513714	-0.444969	0.861666	-0.028492	0.749911	0.778522	0.684031
CUL1	0.6542	2604	0.518	1.38	370	0.056	-1.18	4158	0.849	-0.7481	3321	0.6742	1.38	308	0.0564	-0.9495	3907	0.7883	-0.7419	2785	0.564	-0.5196	2851	0.5708	-1.14	3935	0.7949	0.311355	-0.350726	0.477209	1.13973	0.687674	1.01436	0.93285	1.04303
CUL2	0.5817	2749	0.55	0.943	1784	0.334	-1.05	3768	0.77	-0.6602	3125	0.6289	-1.16	4208	0.8507	-1.26	4552	0.9063	-0.8992	3298	0.664	0.4746	2758	0.5498	0.5821	1595	0.3137	-0.739659	-0.488512	0.156927	0.203961	0.11888	-0.788218	-0.625556	0.016569
CUL3	-1.04	3997	0.823	-1.13	4258	0.873	-0.9172	3397	0.681	1.16	872	0.1613	-1.52	4927	0.9844	1.31	446	0.077	-1.13	4067	0.824	1.04	1299	0.245	-1.18	4094	0.8364	1.43645	1.67682	1.16923	1.2386	1.31752	1.52965	1.28247	1.71237
CUZD1	-1.51	4728	0.971	-1.09	4192	0.86	-1.52	4898	0.982	-1.24	4476	0.8942	-1.15	4178	0.8425	-1.33	4662	0.9241	-1.38	4755	0.957	-1.25	4466	0.8903	0.7069	1390	0.2942	-0.061341	-0.050589	0.610571	0.76582	1.11689	0.576353	0.092855	-0.322869
CX3CL1	-0.6469	3131	0.615	0.9703	1690	0.316	-1.1	3947	0.797	0.9344	1665	0.3251	-0.4904	2603	0.5233	-1.3	4615	0.9168	0.8343	1479	0.297	-1.16	4276	0.8624	0.9084	918	0.1808	-0.962034	-0.056417	-0.872389	0.761696	-0.853268	-0.459131	-1.25492	-1.25273
CX3CR1	-0.7123	3272	0.648	1.16	1013	0.174	-1.46	4828	0.97	-0.7952	3448	0.6957	1	1253	0.2578	0.6909	2431	0.4939	-0.6276	2483	0.513	0.7547	2215	0.4334	0.6711	1456	0.3097	1.1439	0.40317	0.133953	1.00075	0.746489	0.203187	-0.040588	0.722354
CXCL10	1.45	264	0.035	1.26	672	0.109	0.5726	2241	0.429	-1.26	4510	0.9039	-1.42	4799	0.955	-0.7745	3446	0.6987	-1.03	3752	0.746	-1.23	4441	0.8927	0.8044	1159	0.2291	1.01273	1.11455	1.06212	0.832337	1.09556	-0.153914	1.27737	0.572621
CXCL11	-0.6376	3111	0.612	0.8697	2068	0.387	-0.9814	3573	0.723	0.8941	1801	0.3437	1.07	1081	0.1956	1.23	674	0.1306	0.7451	1714	0.331	-0.9546	3833	0.775	-1.49	4941	0.9752	-0.830968	-1.69999	-1.50834	-1.32403	-1.6829	-0.53016	-0.793744	-0.759646
CXCL12	-1.18	4245	0.882	-0.9104	3810	0.776	-0.9328	3434	0.692	-1.09	4191	0.8469	1.39	298	0.0551	-0.5852	3002	0.6107	1.12	845	0.154	0.7748	2152	0.4204	0.9766	767	0.1502	-0.943057	-1.19473	-1.21588	-1.38015	-1.60363	-0.273647	-0.800848	-1.66396
CXCL13	1.06	1405	0.239	-0.7619	3452	0.702	0.9133	1421	0.253	-0.6054	3020	0.5997	-0.5903	2746	0.5406	-0.8049	3533	0.7091	-0.7518	2821	0.556	0.4234	2779	0.56	-0.8624	2724	0.5292	-0.781974	-1.4335	-0.085218	-1.16074	-0.701282	-0.662989	-0.290661	-0.834734
CXCL2	1.39	400	0.054	1.21	868	0.14	-0.6354	2622	0.513	-0.757	3345	0.6794	1.3	470	0.0873	0.9764	1565	0.3041	1.23	610	0.11	1.16	915	0.1679	-1.26	4395	0.8804	-0.404438	-1.975	-1.22877	-1.33508	-1.74121	-1.76075	-0.71206	-0.783586
CXCL3	1.48	211	0.025	1.17	986	0.167	0.5464	2284	0.436	-0.7233	3259	0.661	0.8496	1746	0.3365	0.8056	2073	0.4241	-0.7046	2677	0.54	1.33	404	0.0789	-0.9029	2897	0.5795	-1.127	-2.59456	-1.81587	-1.50169	-1.37725	-0.502746	-1.87003	-1.73593
CXCL6	-0.8172	3499	0.706	-1.6	4886	0.986	1.5	203	0.026	1.21	734	0.1397	1.37	343	0.063	0.7991	2101	0.4285	0.9581	1175	0.228	1.09	1159	0.2165	0.6836	1437	0.2803	1.99854	1.13386	1.23105	1.69468	1.21299	0.669699	1.47927	2.03839
CXCL9	1.37	452	0.063	1.13	1142	0.198	1	1170	0.208	0.6767	2481	0.4924	-0.9491	3663	0.7395	1.47	139	0.0326	-1.49	4900	0.974	-1.58	4952	0.9831	-1.23	4301	0.8532	-0.13651	-0.403396	-1.2386	-0.023285	0.576696	-0.239106	0.490962	-0.015316
CXCR3	-0.865	3607	0.74	0.5718	2911	0.578	-0.6321	2615	0.51	-1.31	4618	0.9168	1.31	461	0.0861	-1.23	4483	0.8939	-1.09	3944	0.79	-0.7206	3231	0.6512	0.717	1361	0.2676	0.998423	1.09381	1.15689	1.54514	1.10798	0.488674	1.06222	1.1335
CXCR4	-0.7819	3415	0.684	-1.16	4312	0.884	0.8888	1482	0.267	-0.6034	3013	0.6048	-1.21	4329	0.8752	0.7052	2392	0.49	-0.943	3439	0.694	-0.5733	2930	0.5847	1.12	526	0.0992	0.915182	1.52421	0.666803	1.25021	0.842053	-0.296256	0.861464	1.18844
CXCR6	-0.74	3325	0.668	-0.5979	3126	0.63	-0.9755	3555	0.723	-0.9591	3888	0.7879	0.9771	1325	0.2613	-1.24	4504	0.8974	0.6038	2039	0.412	1.16	907	0.1666	-0.7516	2295	0.4543	-0.04674	-0.739271	-1.04362	-0.252665	-0.950443	-2.46722	-0.365007	-0.703808
CYB5R1	-1	3914	0.806	-1.26	4467	0.915	-0.5068	2407	0.467	0.7328	2328	0.4629	-1.21	4319	0.873	-0.4566	2874	0.5838	-1.03	3732	0.744	-1.22	4416	0.8882	-1.02	3411	0.6906	0.944786	1.27321	0.936028	0.379583	0.747359	0.918921	1.31736	1.60037
CYB5R3	1.05	1422	0.244	0.6742	2674	0.52	0.7298	1906	0.356	0.5914	2661	0.529	1.54	96	0.0116	0.8587	1934	0.3915	0.6643	1893	0.4	-0.5074	2837	0.5638	-0.7264	2202	0.4572	1.30645	0.604961	0.676988	1.06538	0.850987	1.02035	1.06017	0.963291
CYBA	1.1	1272	0.213	1.06	1375	0.246	0.4484	2348	0.452	0.408	2847	0.5687	-0.979	3741	0.7569	-0.7899	3490	0.7061	0.7601	1680	0.336	-1.14	4244	0.857	0.8076	1153	0.2275	1.01782	0.370593	0.127228	1.56491	0.89234	1.26806	1.07789	0.659074
CYBB	1.38	407	0.056	1.55	114	0.015	-0.5191	2420	0.471	-1.38	4718	0.9431	-0.7554	3143	0.6198	-0.6807	3214	0.6471	-1.28	4528	0.9	-1.41	4764	0.9482	-0.7174	2174	0.4132	-0.470393	0.01569	-0.766069	1.12018	0.389277	-0.308913	0.347742	-0.138841
CYC1	-0.9035	3709	0.756	-1.01	4029	0.824	-1.13	4026	0.817	1.26	580	0.1095	1.07	1084	0.2062	1.22	695	0.1364	-1	3654	0.73	1.16	938	0.1725	-0.9321	3020	0.6071	-0.001125	-1.06682	-1.06927	-0.998936	-1.0281	-0.062054	-0.884143	-0.773686
CYCS	0.9946	1623	0.282	0.9866	1645	0.304	0.6655	2058	0.389	1.36	339	0.0605	0.562	2436	0.4894	1.07	1216	0.2332	0.7804	1630	0.324	-0.9821	3903	0.7881	-1.47	4920	0.9765	1.42289	1.605	0.596148	1.44452	0.682068	1.88719	1.46098	1.64201
CYGB	-1.1	4106	0.848	-1.03	4085	0.835	-0.9407	3457	0.697	-0.8876	3696	0.7441	0.9228	1484	0.302	0.7792	2181	0.4457	-0.8429	3096	0.626	1.04	1304	0.2452	-1.15	4000	0.8183	0.372721	-0.645315	0.129318	-0.023661	0.039657	1.33901	0.134867	0.34277
CYLD	0.6097	2702	0.538	1.12	1179	0.204	-0.6524	2657	0.521	-0.5448	2939	0.5803	-0.5582	2690	0.5313	-1.21	4461	0.896	1.1	894	0.155	-0.7742	3364	0.6784	1.08	584	0.1038	0.098959	0.031566	0.081016	0.594252	-0.447285	0.829748	0.174802	-0.690153
CYP11A1	1.59	83	0.009	1.78	7	0	-0.9153	3388	0.68	1.25	602	0.1144	1.09	1054	0.2002	1.49	108	0.0201	0.4753	2210	0.445	1.73	8	0.0011	-1.12	3832	0.7712	-0.729002	-1.07174	-0.279588	-1.1766	-0.923448	0.171656	-1.03571	0.127849
CYP11B1	-0.7077	3255	0.646	-1.18	4344	0.892	1.12	905	0.157	0.9822	1489	0.2925	-0.8051	3268	0.6588	1.04	1339	0.256	0.956	1177	0.229	-0.9222	3767	0.7564	-0.8318	2594	0.5162	-0.574035	-0.551082	-1.28201	-0.403471	-1.49134	-0.867169	-0.662743	-0.043842
CYP11B2	-1.18	4254	0.884	0.6144	2832	0.552	-1.11	3975	0.803	0.7133	2384	0.4762	0.7907	1900	0.3772	-0.8228	3586	0.7175	-0.8612	3151	0.638	0.917	1721	0.3318	0.9575	811	0.1728	0.164936	-0.353826	-1.15071	0.732075	-0.700213	0.189159	-1.20708	-0.847309
CYP17A1	-1.42	4609	0.952	-1.64	4921	0.991	0.821	1654	0.304	1.26	585	0.1037	-1.16	4223	0.8511	1.12	1044	0.2009	0.7618	1673	0.347	0.8642	1873	0.3688	-1.15	3968	0.8139	1.50648	1.58726	1.23513	1.20527	1.23542	1.67313	1.41764	1.62012
CYP19A1	1.21	895	0.144	0.8923	1989	0.376	0.7026	1976	0.374	1.53	89	0.0204	0.4248	2549	0.5059	-0.7111	3276	0.6601	-0.88	3234	0.641	-0.5635	2910	0.5817	1.03	660	0.1203	-0.031179	0.698993	-0.079746	-0.034842	-0.000711	-0.49308	0.187775	0.212624
CYP1A1	-0.9444	3802	0.787	-0.7802	3492	0.712	0.9328	1367	0.243	1.34	380	0.0757	1.09	1049	0.1892	0.9701	1584	0.2982	0.8742	1376	0.262	0.7185	2310	0.461	-1.08	3698	0.7322	-0.330022	-0.748821	-0.201592	-0.059153	-0.472343	-0.016205	0.057004	1.06156
CYP1A2	1.07	1371	0.234	0.8877	2003	0.374	-0.9898	3596	0.729	-1.56	4930	0.9786	1.46	197	0.0357	-1.56	4925	0.9791	1.45	246	0.04	0.9424	1643	0.313	1.73	42	0.0063	0.482585	-0.64937	-0.208062	1.00741	-1.34977	0.026297	-0.568743	-0.630834
CYP1B1	0.7759	2287	0.439	1.13	1153	0.2	-1.36	4645	0.933	-1.21	4414	0.8864	0.5746	2413	0.4846	-1.28	4581	0.9112	-0.9413	3433	0.692	-1.14	4247	0.8574	0.9417	843	0.1645	1.13454	0.942802	0.721839	1.30168	0.203963	-0.586127	1.21578	1.35522
CYP21A2	1.27	701	0.102	-0.6523	3212	0.64	1.03	1099	0.197	1.1	1062	0.2074	0.9512	1398	0.2765	0.8642	1924	0.3808	1.3	474	0.085	0.6244	2541	0.5029	-1.08	3672	0.7398	-2.23118	-2.5094	-2.31276	-1.57671	-2.23807	-0.904546	-1.89438	-1.31484
CYP24A1	-0.5119	2940	0.577	0.5172	2979	0.582	-0.6347	2620	0.513	-0.4848	2874	0.5749	1.17	818	0.1572	-1.35	4682	0.9302	0.8445	1447	0.289	0.8899	1810	0.3459	-0.7453	2274	0.4499	1.68044	1.43959	1.52891	1.49312	1.16143	1.20786	1.64215	1.93564
CYP26A1	-0.8623	3602	0.739	-1.18	4345	0.894	1.09	971	0.169	0.9494	1614	0.3024	0.4888	2516	0.4994	0.7982	2104	0.4244	0.6061	2035	0.398	0.5893	2625	0.5233	-0.9778	3212	0.6368	0.162167	0.269342	-0.493465	-0.468098	-0.325889	-0.606612	0.025096	0.772742
CYP27A1	1.18	990	0.164	1.04	1461	0.262	-0.6098	2574	0.5	-0.7024	3218	0.6432	1.68	27	0.0053	0.839	1972	0.397	1.12	849	0.148	1.36	357	0.0678	-0.948	3087	0.61	1.08749	-0.378685	0.514738	0.15048	-0.23474	0.700458	0.807051	0.098248
CYP27B1	-0.6731	3189	0.63	-0.5305	3059	0.605	-1.38	4681	0.944	-1.36	4688	0.9347	1.12	973	0.183	-1.05	4148	0.8315	-0.543	2346	0.471	0.8199	2011	0.3916	1.52	149	0.0258	0.825865	0.03299	0.431057	0.276958	0.107415	-1.37467	-0.177624	1.13045
CYP2A13	1.34	517	0.076	1.1	1249	0.219	-0.8533	3198	0.641	-0.7927	3440	0.6908	1.41	264	0.0545	-0.7723	3440	0.6926	1.57	112	0.021	0.6748	2419	0.4853	-0.9369	3035	0.5985	0.208372	0.266209	-0.140502	0.982661	-0.574209	0.960535	1.2317	0.272155
CYP2A6	1.36	456	0.062	0.8924	1987	0.37	1.44	285	0.039	-0.6308	3067	0.6156	1.55	87	0.0134	-0.7048	3266	0.6623	1.38	352	0.061	1.61	50	0.0068	-0.5573	1801	0.3538	1.49104	1.01617	1.26124	1.20833	0.744009	1.37506	1.15754	1.47367
CYP2A7	1.14	1101	0.181	1.09	1279	0.225	1.03	1116	0.199	1.26	569	0.1074	1.35	379	0.0687	0.9141	1763	0.3499	1.27	546	0.096	1.54	95	0.0129	-1.24	4332	0.8688	-0.683091	-0.751639	-1.19594	-1.03424	-1.4186	0.094244	-0.195199	0.77659
CYP2B6	0.9864	1648	0.283	1.22	813	0.138	-0.8105	3075	0.615	-1.32	4645	0.9209	1.23	650	0.121	-1.37	4716	0.936	0.9411	1216	0.247	-1.09	4150	0.8252	1.03	668	0.1439	0.322156	-0.026963	-0.181187	1.37243	-0.163692	0.064933	-0.189712	-0.554377
CYP2C18	-0.7551	3353	0.677	0.7552	2443	0.483	-1.24	4308	0.878	1.28	541	0.102	-0.4803	2596	0.5146	0.8132	2050	0.4134	0.6015	2043	0.4	0.8426	1945	0.3759	-1.32	4616	0.9132	-0.150241	0.121119	0.835853	-0.285761	0.029114	1.41188	0.565287	0.969897
CYP2C19	0.9704	1701	0.299	0.7906	2320	0.445	-0.7498	2910	0.575	-0.6137	3034	0.6086	1.25	600	0.1143	0.6758	2479	0.5072	1.07	960	0.179	1.28	560	0.1014	-1.05	3579	0.7197	-0.575611	-0.232919	0.656965	-0.215864	-0.15348	0.89351	1.08158	1.148
CYP2C8	1.03	1474	0.255	1.07	1359	0.243	1.25	636	0.103	1.35	342	0.061	1.41	258	0.0489	1.07	1243	0.2388	1.69	42	0.004	0.9714	1551	0.2944	-0.9062	2911	0.5828	0.865391	0.670469	0.414796	1.40343	-0.385201	1.58141	1.11281	1.7694
CYP2C9	0.9047	1900	0.343	-0.7108	3334	0.675	1.2	730	0.119	-1.04	4061	0.8235	-0.7198	3031	0.5998	-0.7036	3264	0.657	-1.33	4637	0.92	-1.04	4048	0.8216	-1.16	4011	0.7977	-1.30791	-0.53122	-0.001912	-0.540888	0.166775	0.158773	0.192866	-0.447192
CYP2D6	-0.9916	3896	0.802	-0.7122	3339	0.669	-0.8332	3140	0.626	0.5832	2681	0.539	1	1265	0.2468	-0.7274	3318	0.6747	1.03	1034	0.195	1.35	387	0.073	0.6261	1536	0.3013	1.02911	0.061512	0.497977	-0.130646	0.159438	0.906491	0.160797	0.03498
CYP2E1	1.24	798	0.119	1.03	1499	0.27	0.6933	1997	0.375	-0.7179	3247	0.6577	1.25	608	0.1161	1.27	522	0.1026	0.9085	1296	0.252	0.6103	2573	0.5098	-0.7212	2188	0.4323	0.179919	-0.597666	-0.545782	0.654264	-0.948894	-0.569378	0.351133	1.09647
CYP2F1	-1.76	4972	0.996	-0.5963	3125	0.63	-1.39	4708	0.944	-1.02	4039	0.8183	1.22	661	0.1263	-1.02	4078	0.8204	0.4342	2227	0.434	0.7671	2173	0.4305	-1.03	3434	0.6825	-0.949495	-2.40353	-0.798712	-1.1745	-1.13058	-1.254	-0.976463	-0.438684
CYP2J2	1.21	881	0.142	1.32	513	0.084	-1.23	4272	0.872	0.739	2304	0.4506	-1.39	4727	0.9431	-1.05	4149	0.8337	-0.6192	2468	0.486	-1.49	4842	0.9657	0.8634	1022	0.1817	-1.80125	-0.021467	-0.022226	1.07104	0.1348	-0.0804	0.352118	0.131608
CYP2R1	1.14	1100	0.181	0.8018	2290	0.435	1.21	708	0.118	1.37	319	0.0565	-0.9281	3602	0.7315	0.9166	1756	0.3483	-1.05	3812	0.758	-0.5765	2937	0.5861	-1.31	4583	0.915	-0.78682	0.957064	1.24182	1.48909	1.27919	1.17143	1.13958	2.04865
CYP2S1	-0.8361	3546	0.717	0.7626	2423	0.463	-1.14	4038	0.818	0.7575	2239	0.4497	-0.8142	3292	0.6647	0.8005	2095	0.4294	-1.29	4549	0.916	0.9257	1694	0.3265	-1.45	4894	0.9758	0.076017	-0.184076	-0.021577	0.068775	0.761535	0.273883	-0.229277	0.98923
CYP2U1	-0.9684	3845	0.79	0.8968	1966	0.367	-1.38	4687	0.944	-0.86	3617	0.7362	-0.9735	3727	0.7551	1.12	1026	0.1997	-0.6787	2610	0.526	1.06	1237	0.2322	0.5006	1658	0.3254	0.814813	-0.150074	-0.41338	0.130309	-0.870983	-0.670993	-0.703682	0.082964
CYP39A1	1.46	233	0.031	1.38	372	0.057	-0.7657	2954	0.588	-0.8468	3586	0.7211	-1	3810	0.7731	-1.24	4512	0.9045	-0.4747	2278	0.443	-0.6806	3126	0.6277	1.42	216	0.0323	-0.646229	-1.27618	-1.19822	-0.304881	-1.51391	-1.72792	-1.55497	-1.66086
CYP3A4	1.21	879	0.141	1.21	853	0.144	0.6999	1981	0.375	-0.7902	3432	0.6899	0.8807	1626	0.3078	-0.793	3497	0.7036	-0.8138	3001	0.599	0.6825	2397	0.4816	-1.02	3407	0.6777	-0.672311	0.109514	1.10814	1.33381	1.10751	0.717439	1.06134	1.87639
CYP3A43	1.59	87	0.011	1.28	624	0.105	1.15	847	0.143	-0.7358	3290	0.6599	-0.9855	3755	0.7625	-1.45	4820	0.9603	-0.9252	3381	0.675	-1.06	4083	0.8314	0.6073	1567	0.2827	-0.906477	1.16812	1.3434	1.57542	1.14597	1.03653	0.694269	1.34521
CYP3A5	0.6026	2711	0.542	0.6379	2782	0.551	0.6417	2120	0.406	0.5387	2745	0.5481	-0.5205	2640	0.521	0.844	1960	0.3925	-0.9697	3531	0.706	-0.64	3047	0.6095	-1.33	4637	0.9184	-0.091377	0.168018	0.221087	1.5541	0.880189	0.82275	1.12022	1.24819
CYP3A7	1.56	105	0.014	0.8365	2168	0.42	0.8984	1459	0.26	-0.7644	3363	0.6754	1.18	770	0.1449	-0.7478	3373	0.6803	-0.9268	3385	0.676	-0.571	2926	0.5834	-0.693	2087	0.3981	1.04962	0.798257	1.00478	1.31716	1.44301	1.34998	0.616043	1.5402
CYP46A1	0.5603	2789	0.556	0.3643	3031	0.608	0.6375	2127	0.407	1.28	523	0.0992	0.942	1421	0.2716	-1.05	4154	0.834	0.787	1608	0.309	0.8582	1898	0.3663	-1.42	4832	0.9548	-1.33884	-0.815536	-0.027582	-0.043068	-0.29655	0.177326	-0.350965	0.582143
CYP4A11	-1.08	4073	0.846	0.7163	2569	0.509	-1.05	3770	0.771	-0.6223	3044	0.6055	0.8136	1844	0.3485	0.7996	2098	0.4235	-0.615	2459	0.483	0.7215	2302	0.4592	-0.9269	3001	0.5893	0.430346	0.401379	0.784548	-0.503339	0.373165	0.906566	1.22196	0.725198
CYP4A22	0.7597	2332	0.44	0.7728	2388	0.456	-0.7659	2956	0.585	0.7673	2211	0.4387	1.46	199	0.0361	-0.4881	2896	0.5869	0.7073	1789	0.363	1.41	257	0.0477	-0.9576	3129	0.6296	-0.552067	-0.872421	0.126897	-0.670894	-0.627784	0.466217	-0.614429	-1.44135
CYP4B1	1.18	970	0.161	1.2	885	0.15	-0.9628	3520	0.714	-0.4912	2884	0.5712	1.23	651	0.1252	-1.3	4607	0.9208	1.21	654	0.116	0.9568	1592	0.2984	0.8543	1042	0.1854	-1.55503	-1.50395	0.056469	-0.390262	-0.925968	-0.013643	-0.694667	-0.623596
CYP4F12	0.7619	2329	0.439	0.7724	2390	0.457	-0.9207	3409	0.683	1.28	518	0.0935	0.9158	1503	0.2981	0.9251	1728	0.3415	1.26	554	0.098	-1.08	4138	0.8342	-1.47	4923	0.9771	-0.876074	-1.14996	-1.15862	-0.634181	-0.808657	0.154026	0.299557	-0.236659
CYP4F2	0.6309	2656	0.516	-0.8985	3785	0.77	0.8276	1625	0.301	1.18	832	0.1519	-0.7431	3106	0.6259	1.17	878	0.1638	0.6999	1808	0.381	-1.26	4483	0.8938	-1.02	3426	0.7041	-1.02425	-0.842368	-1.45303	-0.922863	-0.924341	0.018739	-0.377155	-0.753475
CYP4F3	1.34	523	0.073	1.25	702	0.113	-1.44	4782	0.962	1.43	202	0.0355	0.5149	2492	0.5009	0.7356	2302	0.4717	1.04	1020	0.191	1.11	1072	0.2008	-1.24	4337	0.8696	-0.648804	0.255988	0.526285	0.567933	0.5319	1.04671	0.69148	0.828927
CYP51A1	0.5723	2767	0.553	-1.16	4322	0.888	0.8796	1509	0.272	1.08	1135	0.2213	-0.701	2984	0.6018	1.46	149	0.027	-0.8831	3246	0.651	0.8521	1916	0.3748	-0.6532	1967	0.3928	-1.64586	-2.16771	-2.07367	-3.38974	-2.71048	-1.36476	-2.14762	-1.81532
CYP7A1	1.17	1019	0.168	1.36	416	0.064	-0.5982	2548	0.495	1.13	964	0.1838	1.02	1207	0.2246	-0.8098	3547	0.7115	1.11	875	0.151	-0.549	2890	0.5779	-1.54	4995	0.9841	-0.587403	-0.297093	0.458382	0.150502	-0.198922	1.11145	1.03593	1.31514
CYP7B1	1.19	959	0.158	0.7748	2379	0.469	-0.605	2557	0.498	1.37	317	0.0648	-0.8717	3431	0.6932	0.7503	2264	0.4566	-0.9483	3454	0.691	0.7321	2280	0.453	-0.4131	1673	0.3006	0.501026	0.364892	0.572065	-0.071993	0.381572	0.062197	-0.00382	-0.104685
CYP8B1	0.9042	1904	0.344	0.7665	2409	0.476	1.3	515	0.083	-0.9116	3765	0.7603	1.38	320	0.0636	0.8244	2013	0.406	-0.8023	2964	0.589	0.5765	2641	0.5277	-1.31	4565	0.9038	-1.36128	-2.37444	-1.44014	-1.01364	-0.957531	-1.48041	-0.859073	-1.14825
CYR61	1.38	410	0.056	1.18	958	0.159	0.8053	1698	0.313	0.5622	2708	0.5368	0.9805	1317	0.2694	-0.6035	3040	0.6126	1.02	1060	0.207	0.5711	2649	0.521	0.8725	999	0.2129	1.57998	1.22256	1.16918	1.23165	1.1581	1.89647	1.37585	1.84519
CYSLTR1	1.23	815	0.13	1.24	743	0.128	-0.8762	3265	0.655	-1.18	4372	0.8792	-0.931	3616	0.7293	0.8148	2046	0.4126	0.4833	2204	0.429	-1.12	4206	0.8535	0.8512	1049	0.1871	1.73047	1.15781	0.611962	0.859911	1.06993	0.775266	1.22595	1.50227
CYSLTR2	1.05	1410	0.24	1.11	1211	0.212	-1.3	4481	0.907	1.21	719	0.1366	-0.7929	3240	0.645	1.4	257	0.0528	0.8512	1430	0.275	-0.9191	3761	0.7576	-1	3317	0.6589	0.590644	0.954677	0.245913	-0.007465	0.180021	1.14317	1.28685	1.16802
DAAM1	1.43	299	0.042	1.65	33	0.004	-1.33	4569	0.924	0.9807	1492	0.2935	0.7593	1982	0.3909	1.13	990	0.1922	1.18	715	0.134	0.947	1627	0.3093	-0.7789	2396	0.4743	-0.570164	-1.58418	-1.57032	-0.987459	-2.01843	-1.41816	-1.1226	-1.32781
DAB1	0.686	2552	0.487	-0.7373	3389	0.681	0.9712	1273	0.223	0.787	2146	0.4259	-1.36	4669	0.9338	-1.01	4068	0.8169	-0.7294	2748	0.556	-0.8182	3474	0.7019	-1.17	4081	0.8211	0.685438	1.11309	0.375599	1.69781	0.628739	1.59152	0.588213	1.43688
DAB2	1.41	330	0.045	1.63	52	0.005	-1.25	4339	0.885	-0.8104	3488	0.7018	-1.01	3840	0.7693	0.8005	2094	0.4294	-0.9468	3449	0.697	-0.8617	3602	0.7218	-0.4832	1712	0.3638	0.285439	-0.163996	-0.511945	0.127321	0.026563	0.075553	-0.494655	-0.926388
DACT1	-1.59	4850	0.985	-0.9097	3804	0.776	-1.47	4830	0.971	0.9092	1743	0.3432	0.5433	2456	0.4942	0.8602	1931	0.3838	-1.05	3841	0.763	0.9075	1748	0.3346	-1.03	3430	0.694	0.666503	0.447661	-0.080148	0.031025	0.966322	1.0969	0.790087	0.272946
DAD1	-1.01	3941	0.819	1.65	39	0.005	-1.59	4950	0.988	1.38	297	0.0615	0.5859	2397	0.4726	-0.5547	2968	0.5993	1.08	936	0.161	-0.7706	3354	0.6752	-0.7729	2371	0.4545	-0.999275	-0.819826	-0.956262	-0.249725	-1.62176	-0.699567	-0.509134	-0.237648
DAG1	1.34	500	0.07	1.62	59	0.006	-0.8143	3085	0.614	0.676	2483	0.4978	0.7408	2046	0.4024	-0.7574	3395	0.69	-0.8895	3258	0.657	-1.25	4475	0.8979	0.7048	1397	0.2725	-1.32265	-0.112799	-1.18261	-0.097276	-0.619341	-1.07543	-1.06442	-1.38017
DAO	-0.8076	3483	0.701	-0.8674	3711	0.754	-1.01	3646	0.737	1.3	480	0.0847	1.06	1128	0.2154	-1.13	4322	0.8627	-0.5355	2339	0.468	1.12	1041	0.195	-1.05	3576	0.7194	-1.44727	-1.25414	0.028929	-0.262822	0.018822	1.37386	-0.132868	0.518407
DAP	1.03	1473	0.253	1.03	1506	0.271	-0.8916	3316	0.667	1.09	1090	0.2145	1.09	1039	0.1969	-0.6037	3041	0.6177	0.8787	1367	0.27	0.5937	2614	0.5179	-0.8661	2743	0.5464	0.129447	-0.7767	-1.42235	0.501065	-0.949494	0.772778	-0.888007	-0.002058
DAPK1	1.25	776	0.115	-0.8355	3633	0.735	1.57	131	0.016	-0.7438	3309	0.6713	0.9769	1326	0.2614	-0.9991	4031	0.811	0.653	1923	0.391	1.44	216	0.0375	-0.5256	1753	0.3444	-1.30753	-2.36136	-2.39999	-1.89704	-1.87782	-1.92299	-1.82758	-1.33033
DAPK2	1.23	812	0.121	1.31	528	0.084	-0.5874	2529	0.492	1.64	22	0.0027	1.06	1130	0.2158	0.7822	2166	0.4386	1.48	211	0.033	1.59	59	0.0079	-1.1	3786	0.7611	1.1035	1.04097	0.740939	0.257482	0.430961	1.80545	0.684327	1.62273
DAPK3	0.8829	1971	0.361	0.6685	2686	0.537	1.72	41	0.004	1.42	232	0.0479	-1.62	4993	0.9898	0.7941	2120	0.427	0.7856	1610	0.31	-1.32	4607	0.9255	0.8973	939	0.1688	0.084243	0.761306	-0.420938	0.130983	-0.097222	-0.52524	-0.393903	0.599249
DAPP1	1.06	1375	0.233	0.9744	1678	0.31	-1	3637	0.744	1.07	1186	0.2268	-0.7335	3073	0.6062	0.9656	1602	0.3013	1.08	942	0.163	0.7523	2221	0.4412	1.27	358	0.0575	1.83405	1.22024	0.169901	1.15986	0.679997	0.4848	0.047105	0.72019
DARC	1.23	822	0.124	1.51	162	0.018	-1.08	3859	0.781	1.36	329	0.0575	1.13	932	0.1763	0.7171	2357	0.4836	1.61	79	0.011	0.9432	1641	0.312	1.13	522	0.0977	0.928117	0.393726	-0.314119	0.669021	-1.14078	0.76445	-0.339459	-0.220673
DARS	-1.75	4969	0.997	0.8724	2059	0.385	-1.73	5018	0.999	0.6391	2570	0.5159	0.9578	1384	0.2734	0.7406	2290	0.4687	-0.5241	2329	0.466	0.8106	2046	0.3971	-1.14	3915	0.7902	-0.251571	-0.925609	-1.73645	-0.405135	-0.010734	0.485584	-0.319735	-0.30479
DARS2	0.9858	1653	0.289	1.24	742	0.119	-0.8997	3339	0.67	1.18	826	0.1495	1.22	664	0.1238	0.8323	1995	0.4102	0.8298	1496	0.309	1.29	545	0.0911	-1.27	4458	0.9007	-1.85063	-1.74829	-1.95602	-0.775244	-0.940655	0.52946	-0.860482	-0.651178
DAXX	0.8314	2124	0.392	1.13	1151	0.2	-0.7515	2915	0.577	-1.19	4395	0.8818	0.9139	1515	0.2988	0.4366	2852	0.5781	-1.33	4639	0.924	-0.8746	3646	0.7327	-1.19	4153	0.8362	-0.164875	-1.10157	-1.29335	0.342173	0.359927	-0.936649	0.034606	-0.17678
DAZAP2	1.11	1238	0.204	0.5574	2934	0.571	1.33	466	0.074	-1.16	4336	0.8707	-0.6164	2788	0.561	-1.25	4523	0.9008	0.4925	2194	0.443	-1.66	5002	0.9916	0.8094	1148	0.2267	0.724984	0.574623	0.135003	1.67701	0.180949	0.411245	0.931567	-0.143179
DAZL	-0.7642	3380	0.681	-1.37	4615	0.948	1.38	373	0.059	1.02	1378	0.2693	-1.25	4414	0.8895	-1.16	4361	0.873	1.15	773	0.142	-1.05	4055	0.8174	1.29	343	0.0584	-2.09481	-0.430722	-0.4691	-0.305749	-1.07216	-0.384303	-0.353099	-0.372421
DBC1	-0.4932	2930	0.574	1.04	1457	0.261	-1.06	3817	0.771	-0.6309	3068	0.6156	1.09	1028	0.1961	-1.44	4807	0.9569	-1.03	3766	0.748	0.5305	2699	0.5374	-0.7268	2203	0.437	-0.508573	-0.678764	0.560259	0.477627	0.022257	0.01125	-0.032787	-0.089273
DBH	0.5528	2797	0.546	1.33	482	0.073	-1.3	4465	0.907	1.25	599	0.1136	-1.41	4777	0.9524	0.9744	1573	0.3059	-0.9789	3557	0.716	-0.729	3251	0.6555	-0.738	2242	0.4446	0.954846	0.588768	-0.305125	-0.117391	0.72752	-0.261019	-0.268213	0.405493
DBN1	1.06	1379	0.234	0.9501	1763	0.33	1.12	896	0.154	0.7739	2183	0.4271	0.965	1363	0.2586	1.26	560	0.1111	-0.7317	2754	0.546	0.7585	2203	0.4364	-1.57	5009	0.9886	0.342451	0.082479	0.804172	1.56947	1.01949	1.30337	1.14166	1.76831
DBP	1.13	1152	0.192	0.9721	1684	0.311	-0.617	2588	0.504	0.9503	1608	0.3018	-0.4538	2576	0.5107	-0.9567	3924	0.7916	-1.06	3846	0.765	1.02	1400	0.258	-1.12	3840	0.7657	-1.9197	-1.94863	-0.795029	-1.22998	-0.730498	-0.439335	-1.455	-1.2282
DBT	-0.9874	3892	0.797	-0.8433	3653	0.74	0.6286	2145	0.426	1.22	679	0.1307	-1.32	4588	0.9207	0.7747	2195	0.4434	1.05	1000	0.186	-0.8136	3463	0.6996	1.19	447	0.0795	0.557492	0.735409	0.012403	0.248867	-0.270403	-0.230505	0.912294	0.439974
DCC	1.08	1342	0.228	-1.08	4171	0.855	1.47	233	0.031	-0.7061	3223	0.6495	-1.35	4651	0.932	0.4422	2849	0.5776	1.15	784	0.143	-1.11	4183	0.8454	0.8712	1002	0.196	0.754797	0.763912	0.652099	-0.35049	-0.27732	-0.20677	0.755583	0.551794
DCI	1.2	913	0.142	1.32	503	0.077	-0.7893	3007	0.598	0.9175	1716	0.3374	1.31	450	0.0842	0.635	2594	0.5272	0.4474	2221	0.449	1.26	606	0.1113	-1.61	5029	0.9954	0.048562	-1.18295	-0.88439	-0.216531	-0.511522	0.422292	-0.922571	-0.002422
DCK	0.8203	2159	0.409	0.6584	2719	0.542	-0.5502	2470	0.479	0.8395	1969	0.391	0.5943	2377	0.4779	-0.7891	3489	0.7058	-0.5958	2426	0.488	0.696	2371	0.4665	-1.15	3975	0.8028	-0.480932	-0.015878	0.711763	0.288404	0.282146	0.393588	0.794123	1.31491
DCLRE1A	1.01	1582	0.275	0.6523	2737	0.53	0.6471	2100	0.398	-1.1	4209	0.8497	1.2	718	0.142	-1.13	4309	0.8602	-0.909	3323	0.671	0.8962	1788	0.3422	-1.21	4224	0.8503	0.770447	-0.172825	1.17406	1.13074	1.08324	1.03425	1.43247	1.49937
DCLRE1B	-0.7563	3356	0.678	1.16	1003	0.177	-1.51	4884	0.976	-0.5031	2895	0.5735	1.2	731	0.1378	-1.48	4845	0.9659	0.4939	2193	0.427	1.29	516	0.0967	-0.6857	2064	0.3929	-0.777845	-1.34861	-1.47598	-0.578322	-0.848896	-0.366334	-0.774354	-1.24023
DCLRE1C	0.7609	2330	0.439	1.3	555	0.088	-0.5319	2437	0.473	0.8813	1839	0.3615	1.06	1119	0.2124	-1.09	4240	0.8475	1.2	667	0.121	0.6953	2377	0.4668	-0.9442	3067	0.617	0.278505	0.50786	0.478493	0.755498	0.318751	0.182368	1.00479	0.650812
DCN	-1.4	4584	0.949	-1.38	4622	0.944	-0.4093	2365	0.454	0.751	2261	0.4502	1.07	1097	0.2083	-0.9904	4010	0.8072	-0.4132	2248	0.452	0.7781	2148	0.418	-0.924	2991	0.5985	1.14492	1.27952	1.02513	1.62846	1.40533	-0.288557	1.05844	1.83016
DCP1A	-1.36	4517	0.939	-1.6	4889	0.986	-0.9199	3406	0.683	0.886	1827	0.359	-0.6485	2848	0.5754	-0.782	3470	0.7021	-0.707	2686	0.542	0.673	2426	0.4799	-1.04	3495	0.7054	1.78645	1.77018	1.60315	1.81974	1.84719	1.85031	1.6875	2.57311
DCT	1.42	315	0.045	1.09	1300	0.229	1.22	702	0.112	1.15	918	0.1767	-0.6664	2894	0.5838	-0.6013	3033	0.6166	1.15	787	0.144	-0.6662	3095	0.6231	-1.43	4845	0.964	-0.837143	0.137347	-0.275741	0.343788	-1.0469	-0.067297	0.023204	1.06085
DCTD	-1.03	3977	0.82	0.9007	1950	0.365	-1.06	3810	0.77	-1.14	4280	0.8608	-0.7861	3215	0.6459	-0.8308	3609	0.729	-1.59	5003	0.992	-1.22	4410	0.8875	-0.6316	1922	0.3825	1.44151	1.23164	1.05046	1.06929	1.18618	0.217407	1.10581	0.916566
DCTN1	-1.68	4929	0.992	1.54	131	0.017	-1.88	5040	1	0.6586	2531	0.5018	0.8544	1731	0.3225	0.9983	1479	0.2787	-1.03	3764	0.749	1.04	1332	0.2449	-1.36	4713	0.9304	-0.762544	-1.34179	-0.910891	-0.241562	-0.456244	0.038222	-1.17913	-1.77872
DCXR	1.4	361	0.049	1.49	187	0.022	-0.9151	3387	0.679	-1.44	4791	0.9543	-0.791	3230	0.6525	-1.35	4691	0.9322	-1.01	3682	0.741	-0.9431	3814	0.7607	1.37	252	0.0515	-1.12628	-1.27723	-0.865674	-1.17943	-1.42383	-1.69281	-1.37156	-1.84253
DDB1	-1.07	4063	0.837	-0.4333	3033	0.595	-0.9491	3482	0.701	1.09	1111	0.2183	-0.7148	3017	0.6088	1.13	1007	0.1958	-0.9978	3625	0.727	-0.806	3438	0.6953	-1.15	3973	0.8021	0.098955	-0.056804	-2.21325	-0.231288	0.083866	-0.89199	-0.276529	-0.02057
DDB2	-0.6675	3178	0.634	0.9827	1660	0.303	-1.35	4598	0.927	0.7644	2216	0.4328	-0.9083	3540	0.7173	0.6705	2493	0.5078	-0.6326	2497	0.492	-0.7466	3293	0.664	-1.33	4643	0.9192	1.05303	1.18656	1.06158	0.903026	1.28064	1.19119	1.53038	1.69383
DDC	1.26	735	0.108	1.22	811	0.13	-1.05	3791	0.766	-1.28	4552	0.9082	1.65	37	0.0032	-1.22	4476	0.8919	1.07	957	0.178	1.49	150	0.0237	1.57	112	0.0206	1.36054	-0.031469	0.431812	0.80905	-0.142406	-0.327904	-0.393028	0.756639
DDEF1	1.02	1516	0.261	1.09	1285	0.226	-1.1	3936	0.795	0.8026	2102	0.4156	-0.9063	3537	0.7206	-0.8767	3732	0.753	0.9552	1181	0.229	-0.586	2956	0.5889	-0.7124	2150	0.4269	0.259408	0.548568	0.670092	0.132034	0.305173	0.902801	0.703978	1.09674
DDEF2	1.22	850	0.137	1.07	1332	0.236	0.809	1685	0.313	1.08	1124	0.215	0.921	1488	0.2836	0.9415	1662	0.3215	0.8596	1407	0.271	0.8292	1974	0.3868	0.9871	740	0.136	1.33951	0.587803	0.272422	0.676426	-0.08953	0.741614	-0.971873	0.273707
DDHD1	0.9434	1774	0.317	-1.47	4718	0.963	1.19	737	0.126	-0.5358	2929	0.5848	-0.8704	3426	0.6998	0.8808	1868	0.3705	-1.09	3965	0.794	-0.5897	2961	0.5901	-1.05	3536	0.7132	-0.624625	-0.758653	-0.074302	-0.847274	0.136045	-0.343243	-0.375111	-0.579853
DDIT3	-0.9677	3841	0.79	-1.2	4383	0.897	0.6368	2128	0.402	-1.42	4765	0.9498	-0.8791	3457	0.7049	0.8052	2075	0.4241	-1.27	4505	0.901	0.7207	2305	0.4515	-0.443	1681	0.3304	0.407112	0.064339	0.087947	-0.925465	0.02854	-0.614317	0.224151	0.498203
DDIT4	0.9043	1902	0.344	0.6241	2809	0.546	0.7958	1731	0.317	0.6379	2574	0.5169	1.46	191	0.0342	1.04	1346	0.2575	1.51	177	0.028	1.18	849	0.1552	0.565	1609	0.3172	1.21399	0.179286	-1.50724	-0.17035	-1.02334	0.255448	0.297785	0.390761
DDO	-1.47	4692	0.965	-1.12	4245	0.871	0.7971	1726	0.317	-0.574	2980	0.5945	-0.8655	3413	0.698	0.8355	1980	0.4027	-1.09	3964	0.792	0.9542	1605	0.3046	0.9739	773	0.1516	1.29998	0.656998	0.744502	-0.11412	1.06906	0.275931	-0.273616	0.565469
DDOST	0.7944	2222	0.417	1.23	795	0.126	-0.8779	3271	0.656	1.05	1266	0.2477	-1.14	4167	0.8419	0.7884	2137	0.4355	-1.3	4563	0.913	-1.68	5010	0.9935	-1.22	4281	0.8608	-1.88979	-1.23361	-2.45189	-0.431421	-1.14572	-1.38309	-1.04976	-0.920367
DDR1	0.5963	2717	0.532	-0.5731	3093	0.613	0.533	2301	0.439	1.11	1027	0.1999	1.19	754	0.1486	0.6484	2557	0.5203	1.71	30	0.004	1.49	153	0.0239	1.57	115	0.0207	1.54232	1.05539	0.654489	0.437397	-0.661982	1.26081	-0.247317	0.324626
DDX1	-1	3921	0.818	-1.29	4503	0.927	0.7386	1881	0.351	0.5848	2678	0.5385	0.6514	2262	0.4523	-0.8482	3657	0.7389	-0.8585	3141	0.635	1.49	147	0.0237	-0.8957	2862	0.5732	-0.507289	-0.033022	1.05022	-0.70746	-0.11156	0.120259	-0.053877	0.671244
DDX18	-1.87	5016	1	-0.8139	3574	0.723	-1.81	5034	1	-0.7733	3384	0.6835	-1.07	3988	0.7992	0.7448	2281	0.469	-1.23	4370	0.886	-0.8328	3516	0.7063	-0.7182	2178	0.4525	-0.836395	-2.2159	-3.11303	-1.61473	-1.31269	-1.94036	-2.71575	-1.95397
DDX19A	0.6447	2628	0.51	0.7718	2392	0.457	0.8661	1540	0.282	1.07	1174	0.2303	-0.77	3176	0.6366	0.9334	1692	0.335	1.14	805	0.146	0.7316	2282	0.4461	-1.02	3382	0.6861	-0.818191	-1.20233	-0.483007	-0.366917	-0.432748	-0.572981	-0.557049	-0.267075
DDX20	-1.52	4745	0.975	-1.85	5025	0.998	1.16	802	0.136	0.7623	2226	0.4432	1.3	475	0.0882	-1.08	4224	0.8446	1.29	494	0.088	0.9454	1633	0.3109	1	708	0.1409	0.375231	-0.558307	-0.275597	-0.35369	-0.59998	-0.559407	-0.150978	-0.053192
DDX23	-1.31	4443	0.922	0.7246	2543	0.489	-1.31	4507	0.912	-0.5272	2922	0.5827	0.7938	1896	0.3715	0.7278	2327	0.4772	-0.8744	3203	0.645	-0.5172	2846	0.5702	-0.9534	3113	0.626	1.09992	-0.321424	-2.17819	0.447498	-0.241361	-1.04107	-1.34596	-0.82465
DDX4	1.34	512	0.075	1.23	775	0.132	1.04	1087	0.193	1.2	766	0.1474	-1.39	4733	0.9459	0.9843	1538	0.2993	-0.7882	2923	0.591	-1.04	4053	0.8174	0.9107	912	0.1797	-1.20185	-1.23181	-1.6974	-1.73385	-1.49929	-2.23771	-1.48027	-1.00205
DDX41	0.5072	2849	0.569	1.39	360	0.053	-1.38	4671	0.937	0.8415	1966	0.3833	-0.7549	3141	0.6192	1.21	736	0.1429	-0.949	3455	0.692	1.14	995	0.1797	-0.8404	2628	0.511	-0.556908	-2.62071	-3.17668	-1.17968	-1.29442	-1.7072	-2.81251	-0.958218
DDX47	1.14	1111	0.183	1.11	1209	0.211	-1.14	4042	0.818	1.46	168	0.0298	-0.7326	3070	0.6172	1.19	816	0.1573	-1.18	4237	0.852	-0.8128	3458	0.6993	-1.15	3971	0.802	-2.90001	-2.10928	-1.87109	-2.31304	-2.23462	-0.682576	-2.07423	-0.567019
DDX50	1.21	885	0.142	1.33	475	0.077	-0.7467	2904	0.576	0.8461	1946	0.3861	0.9241	1478	0.293	-0.6877	3226	0.6526	1.3	478	0.086	1.68	19	0.0026	-0.7118	2149	0.4266	-0.895499	-1.4841	-0.32843	-1.49303	-1.60756	0.290711	-1.11286	-0.792013
DDX51	-1.55	4803	0.98	-1.46	4713	0.962	-0.8803	3281	0.657	-0.8129	3495	0.7083	1.22	666	0.1299	-0.9323	3864	0.7786	0.7736	1651	0.329	0.8956	1791	0.3425	-0.7127	2154	0.4269	0.148389	-1.22822	-0.797445	0.191847	-0.313395	1.20902	-0.988056	0.335675
DDX52	-1.23	4314	0.9	1.07	1346	0.239	-1.44	4784	0.963	-1.09	4189	0.8393	-0.9538	3679	0.7363	-0.8298	3607	0.7214	-0.8608	3149	0.638	-1.11	4195	0.8355	0.9252	875	0.1874	1.07726	0.781503	0.984573	0.955995	1.15036	0.673099	0.941187	0.831995
DDX54	0.8592	2042	0.374	1.53	140	0.015	-1.35	4604	0.931	1.32	418	0.0742	1.2	728	0.143	0.7623	2231	0.4523	-1.09	3974	0.795	1.4	269	0.0508	-1.04	3505	0.707	-0.797608	-1.9332	-1.42741	-2.6376	-1.77238	-0.167806	-1.34308	-0.240349
DDX55	0.6986	2520	0.479	0.8969	1965	0.367	-1.02	3682	0.743	-1.19	4394	0.8811	0.5918	2383	0.4786	0.6146	2629	0.5362	0.7459	1711	0.343	-0.5653	2914	0.5819	-0.7312	2213	0.44	1.30468	1.00072	1.01019	0.353992	0.459308	-0.105352	1.42141	0.017964
DDX56	1.48	214	0.025	0.5726	2909	0.566	1.61	94	0.013	1.27	550	0.1025	0.8623	1694	0.3283	-0.6049	3045	0.6181	0.6993	1809	0.368	1.04	1328	0.2494	-1.09	3746	0.7515	-1.20596	-1.7394	-1.65731	-1.16834	-1.37376	-0.989995	-1.48803	-0.976847
DEDD	1.72	17	0.002	1.64	45	0.005	-0.7448	2899	0.571	-0.7737	3385	0.6881	-0.5761	2717	0.5433	-1.02	4089	0.8195	1.12	856	0.155	1.21	749	0.1366	1.49	163	0.0293	-0.159656	-0.605225	-0.087953	-1.83354	-0.91659	-1.06215	-1.17577	-0.736976
DEDD2	1.13	1137	0.188	0.6837	2651	0.528	0.641	2122	0.406	-0.7574	3347	0.6712	1.24	633	0.1214	-1.29	4599	0.9195	0.4468	2222	0.433	1.05	1277	0.2342	-0.7941	2444	0.4717	-0.351168	-1.71597	-0.685257	-0.137828	-0.164451	-0.8194	-0.548371	0.847841
DEFA1	0.7113	2477	0.486	1.13	1143	0.198	-0.7828	2990	0.598	1.18	817	0.1524	1.18	769	0.1437	-1.12	4300	0.8627	1.09	914	0.159	1.4	271	0.0524	0.8853	970	0.1728	-0.445542	-0.70199	-0.090492	-0.823695	-0.711443	0.125338	-0.672965	-0.777362
DEFB1	0.9378	1790	0.322	0.821	2230	0.422	0.6023	2193	0.419	-1.06	4118	0.8281	1.23	657	0.1219	-0.976	3981	0.7924	1.11	870	0.168	-0.66	3085	0.6149	1.19	451	0.0932	1.32272	1.13022	1.18485	1.30991	0.499644	1.18925	1.15066	0.843783
DEFB4	1.02	1534	0.263	1.13	1155	0.2	-1.39	4705	0.943	-0.8291	3538	0.7184	0.8211	1814	0.3544	-0.903	3796	0.7656	1.18	711	0.133	0.7835	2132	0.4148	-1.35	4698	0.9364	-1.51367	-2.994	-1.87882	-1.1089	-1.7757	-2.01178	-1.45595	-1.35343
DEGS1	0.5473	2804	0.561	-0.8084	3559	0.729	0.5816	2228	0.428	-1.08	4162	0.8415	1.09	1026	0.1961	0.5723	2727	0.5525	1.06	985	0.183	-1.52	4898	0.9752	1.24	393	0.0674	1.23768	0.737807	0.563366	1.48409	0.406278	0.776693	1.22514	0.321643
DEGS2	-0.5625	2986	0.587	1.04	1478	0.266	-1.02	3694	0.744	-0.7	3214	0.647	-0.7952	3247	0.6515	-0.6627	3181	0.6418	-0.5992	2430	0.489	-1.1	4166	0.842	-0.8099	2499	0.4982	-0.732456	-0.692056	-1.28088	-0.052083	-0.865818	-1.10688	-0.352258	0.21847
DERA	1.21	900	0.139	1.01	1554	0.283	-0.9191	3404	0.682	0.8453	1951	0.3864	-0.7278	3058	0.6159	0.7535	2255	0.4593	0.8814	1361	0.269	-0.9875	3918	0.7901	-0.6058	1878	0.3719	0.042056	0.048949	-0.219734	0.185306	-0.22132	0.104299	1.1393	-0.798056
DES	0.6681	2577	0.497	1.54	119	0.013	-1.06	3807	0.769	-1.31	4610	0.9159	1.29	501	0.081	-1.42	4776	0.9557	0.6985	1811	0.376	0.938	1656	0.3101	1.16	488	0.1078	-0.933688	-0.871897	0.304433	0.287139	-0.649641	-1.09996	-1.09511	-0.99705
DFFA	-0.7987	3464	0.695	-0.8617	3699	0.751	0.9027	1447	0.26	1.01	1396	0.2737	0.7784	1933	0.3807	1.1	1123	0.2152	0.5881	2063	0.417	1.34	392	0.0743	-0.4481	1684	0.3308	1.07106	0.436621	0.638566	0.592141	0.344238	-0.263554	0.53442	1.11335
DFFB	0.8728	2002	0.364	-0.6915	3296	0.659	1.27	595	0.097	-0.7225	3257	0.6604	1.12	970	0.1821	-0.9284	3858	0.7767	-0.6452	2518	0.509	1.04	1297	0.2446	-0.8556	2698	0.5379	-0.729749	-1.91869	-1.06913	-1.39228	-1.21856	-0.59283	-1.47333	-2.57167
DGAT1	-0.7279	3300	0.662	0.9264	1845	0.348	-0.6707	2711	0.532	1.6	39	0.0099	-1.24	4398	0.8898	1.17	852	0.1651	1.13	835	0.146	0.7074	2350	0.468	-0.588	1851	0.3378	0.073616	1.14589	-0.24727	0.376329	-0.373232	0.526	-0.418774	1.29327
DGAT2	1.06	1383	0.235	0.8347	2173	0.422	-0.4729	2385	0.46	1.26	583	0.1108	1	1250	0.2341	-1.08	4232	0.8473	1.05	989	0.173	-0.6361	3038	0.6075	-1.28	4486	0.888	-0.829793	-0.154022	0.185305	0.498923	-0.826332	0.813526	1.15467	0.252242
DGKA	-1.22	4289	0.895	-0.8111	3566	0.722	0.4928	2326	0.447	-0.9867	3952	0.7999	-1.1	4072	0.8252	-1.05	4145	0.8308	0.4815	2205	0.445	0.5755	2644	0.5251	1.17	472	0.0847	0.614063	0.200007	0.028414	-0.044022	-0.170612	-0.353816	-0.079516	-0.051646
DGKB	1.07	1356	0.229	1.54	124	0.016	-1.41	4733	0.948	0.8417	1965	0.383	1.3	472	0.09	-1.68	5012	0.9913	1.55	132	0.023	1.21	772	0.1424	1.45	197	0.0279	1.41716	1.24103	1.40636	1.7563	0.965353	1.56656	0.940215	2.17691
DGKD	1.61	72	0.009	1.15	1055	0.185	0.7138	1951	0.368	-1.04	4076	0.8261	0.7557	1993	0.3863	-1.59	4957	0.983	1.05	996	0.175	1.22	737	0.1372	1.57	110	0.0169	-0.908464	-1.04082	0.035714	-0.523579	-1.76235	-0.661167	-2.03961	-0.679526
DGKE	0.8828	1972	0.361	0.5926	2873	0.57	0.8418	1594	0.294	-1.16	4316	0.8714	-0.6633	2886	0.5719	-1.36	4701	0.9379	-0.9019	3306	0.658	-1.27	4523	0.9118	-0.6384	1935	0.3611	-0.345791	-0.404858	-0.009217	1.01496	0.315676	-1.0881	0.059962	-1.15126
DGKG	-0.8258	3522	0.71	-0.4994	3044	0.6	-0.7	2775	0.545	-0.9714	3915	0.793	-0.7357	3081	0.6181	-1.31	4625	0.9177	-0.8275	3050	0.616	0.639	2507	0.4951	-0.9405	3049	0.6139	1.12486	1.16071	1.07105	1.34521	1.11025	-0.0736	0.23245	1.60553
DGKH	0.8174	2167	0.41	-1.05	4115	0.847	1.15	841	0.142	-0.9769	3927	0.7944	-1.49	4896	0.9709	-1.45	4817	0.9599	-0.5905	2418	0.472	-1.54	4926	0.9773	0.8279	1088	0.1972	-1.28491	-0.411755	-0.918981	0.351739	-0.771337	-1.26654	-0.163169	-0.828552
DGKI	1.33	531	0.077	-0.8733	3724	0.767	1.6	104	0.014	0.8594	1899	0.3758	-1.17	4231	0.8567	1.25	621	0.1207	-1.28	4532	0.907	0.6799	2402	0.4753	0.8502	1053	0.2081	1.19722	0.598795	-0.204311	-0.226828	0.514372	0.498391	-0.220167	-0.512222
DGKQ	1.3	629	0.089	1.11	1226	0.214	0.9745	1261	0.221	1.34	377	0.0661	1.33	413	0.0781	1.29	481	0.0913	1.49	204	0.032	1.4	275	0.0517	-0.8827	2804	0.562	-0.219941	-0.148184	-1.11179	-1.1727	-2.96548	0.834346	-1.14632	-1.29815
DGKZ	1.14	1126	0.186	1.05	1421	0.254	-0.8532	3196	0.639	-0.7396	3295	0.6654	-0.8849	3473	0.7	0.7246	2335	0.4784	-0.649	2528	0.523	-0.5236	2859	0.5678	-1.29	4534	0.9156	-1.28846	-1.65226	-1.61617	-1.19119	-1.46615	-1.09344	-0.582878	-1.03195
DHCR24	-0.4879	2927	0.573	-1.49	4747	0.966	1.3	525	0.085	1.21	737	0.1355	0.9656	1359	0.2774	-0.5983	3023	0.6111	1.59	92	0.012	1.03	1355	0.2538	-0.9313	3017	0.6164	0.696437	0.925289	0.601244	1.19223	0.095364	1.05996	0.696764	1.14716
DHCR7	-1.05	4026	0.833	-0.8646	3704	0.761	-0.7514	2914	0.579	0.4709	2818	0.5603	-0.9703	3715	0.7535	-0.7936	3499	0.7039	1.14	802	0.141	-0.6684	3100	0.6216	0.6275	1529	0.2769	-0.825111	-0.349336	0.60061	-0.299355	-0.001363	-1.14278	0.31721	0.09142
DHDDS	0.8445	2082	0.384	1.29	596	0.095	-1.54	4915	0.985	-1.13	4257	0.8575	0.857	1717	0.3314	-0.4914	2901	0.5877	0.6182	2006	0.407	-1.25	4479	0.898	-1.24	4359	0.8723	-0.961843	-1.54716	-0.55095	-0.702887	-0.480261	-0.936137	0.053237	-0.645643
DHFR	-0.6197	3086	0.605	0.8898	1995	0.373	-1.13	4027	0.817	0.8076	2077	0.4129	-1.12	4103	0.8302	1.32	407	0.0738	-0.7376	2773	0.561	-0.9564	3838	0.774	-1.31	4561	0.9109	1.06716	1.84642	1.37527	1.65508	1.64843	1.41222	1.88763	1.71395
DHH	1.48	205	0.027	1.21	854	0.144	-0.5404	2454	0.477	-0.6232	3047	0.6119	-1.6	4983	0.9893	-1.09	4239	0.8474	-1.48	4895	0.977	-1.57	4949	0.9825	0.8686	1009	0.1978	-0.490848	0.427601	0.730718	0.735297	1.04931	-0.635084	0.644429	0.513694
DHODH	1.26	750	0.11	1.3	558	0.088	-0.8314	3134	0.625	-0.8688	3645	0.7411	-0.5397	2669	0.5335	1.27	545	0.1075	-1.39	4764	0.949	1.32	454	0.0847	-1.04	3506	0.7072	0.025163	-1.36863	-0.750648	-0.477985	0.016284	-0.47463	-0.792384	-0.276568
DHRS1	1.37	431	0.06	0.7254	2535	0.503	1.71	51	0.004	-1.31	4627	0.9241	-0.7376	3087	0.6082	-0.8703	3713	0.7453	-0.4824	2286	0.444	-1.17	4296	0.8734	1.29	340	0.0543	0.316129	0.239282	-0.635363	0.766406	-0.310731	-1.41391	-0.22476	-0.309218
DHRS2	1.41	332	0.045	1.38	363	0.054	-0.5159	2418	0.469	1.35	351	0.062	1.62	49	0.0063	1.14	963	0.1884	1.29	497	0.088	1.62	42	0.0058	-1.15	3992	0.8061	-0.204415	-1.06476	-0.755453	-0.101449	-1.30039	0.358921	-0.646548	1.56603
DHRS3	1.24	809	0.121	1.54	129	0.013	-0.8885	3301	0.663	-1.3	4608	0.9153	0.9268	1470	0.291	-0.7859	3484	0.7035	-0.8261	3047	0.615	-0.8712	3636	0.7304	-1.24	4335	0.8692	0.34849	-0.307333	0.671357	0.322826	0.221725	0.382162	1.07386	-0.0842
DHRS4	0.7857	2253	0.432	-0.8473	3661	0.751	1.04	1075	0.19	-1.21	4420	0.8883	-1.05	3961	0.794	0.7598	2242	0.4547	0.937	1227	0.238	-1.02	4002	0.8055	1.06	620	0.1217	1.37747	1.10934	0.892945	0.961825	0.473769	0.026226	1.22698	-0.059058
DHRS7	0.6538	2606	0.518	1.37	380	0.059	-1.7	5012	0.997	-0.7922	3436	0.6906	-1.17	4229	0.8558	-1.08	4218	0.846	-1.31	4599	0.912	-0.9914	3928	0.7952	0.9946	730	0.1335	0.256851	0.272879	-0.200321	1.22165	0.785516	0.444725	0.241588	0.052949
DHRSX	0.8189	2162	0.409	-0.672	3249	0.657	1.26	606	0.096	0.6142	2624	0.5266	-0.8561	3398	0.6926	0.9358	1681	0.333	-1.12	4042	0.812	-0.8711	3635	0.7303	-0.8641	2733	0.5446	1.39077	0.969768	0.40724	0.457245	0.398501	0.718289	1.10961	0.53836
DHX58	-0.8768	3634	0.741	1	1591	0.291	-0.6555	2667	0.521	0.8566	1912	0.3784	-1.02	3869	0.7811	-1.17	4375	0.8746	-1.02	3708	0.738	-1.24	4453	0.8947	-0.7174	2173	0.43	0.444655	-0.103277	0.260152	1.34478	0.271971	0.720768	0.007612	0.387112
DIABLO	0.9096	1888	0.341	-0.6257	3166	0.629	1.05	1065	0.188	0.7998	2112	0.4204	0.7311	2075	0.4126	1.01	1444	0.2822	-1.25	4443	0.897	0.7464	2242	0.4388	-1.3	4547	0.9168	1.31451	0.884082	0.777578	1.48277	1.2563	1.32832	0.48689	1.76852
DIAPH1	0.9639	1717	0.299	-0.6845	3277	0.663	-0.7722	2971	0.591	-0.8355	3555	0.7226	-0.6819	2933	0.5915	-0.8408	3642	0.7349	-0.8426	3094	0.626	-0.8784	3653	0.7345	-0.8658	2742	0.5464	1.05129	0.871805	1.16329	1.36114	1.30985	0.773702	1.11463	1.82292
DIAPH2	0.3838	2902	0.569	1.12	1172	0.203	-0.8036	3062	0.607	1.44	186	0.0329	-1.08	4027	0.8121	1.65	15	0.0014	-0.5347	2337	0.468	1.32	456	0.085	-1.13	3881	0.7812	0.044358	0.075779	0.132508	-0.446711	0.156591	0.040493	-0.692153	0.365786
DICER1	1.52	165	0.021	1.46	230	0.032	-1.27	4396	0.894	-1.33	4649	0.9282	-0.91	3548	0.7184	-1.68	5010	0.9911	0.954	1183	0.221	0.7307	2286	0.4538	1.7	53	0.0075	-0.375401	0.042417	0.003501	-0.290653	-0.731423	-2.02865	-0.411215	-1.08119
DIDO1	-0.9529	3817	0.781	-0.8343	3630	0.735	-0.5489	2466	0.478	0.5277	2761	0.5472	-1.11	4087	0.8241	0.667	2501	0.5056	-1.13	4075	0.826	0.6359	2514	0.4959	1.04	654	0.1399	-0.607583	-0.254323	-0.415328	-1.19059	-0.918019	-0.97825	-0.89274	-1.64317
DIO1	-1.12	4145	0.856	0.7273	2533	0.487	-1.14	4035	0.818	0.9708	1531	0.3014	-0.5852	2740	0.5467	-0.716	3286	0.6693	-1.1	3984	0.797	0.9177	1717	0.3285	-1.13	3893	0.7829	0.670486	0.748362	1.25935	1.4391	1.36821	1.40736	1.10736	1.63882
DIO2	-0.6587	3162	0.622	1.08	1327	0.235	-1.3	4479	0.909	1.08	1120	0.2196	-0.8002	3260	0.6551	1.13	1001	0.1943	0.7731	1652	0.329	0.9722	1545	0.2934	-1.09	3756	0.7534	-0.262044	-0.532487	-0.722234	0.162226	-0.48452	0.735872	-0.980395	0.112323
DISC1	-0.8011	3471	0.696	-1.09	4194	0.86	-0.7925	3018	0.6	1.34	384	0.0669	0.5297	2474	0.4974	1.15	932	0.1806	-0.9333	3415	0.688	-0.5068	2835	0.5686	-1.49	4943	0.981	-1.44685	-1.71397	-1.12419	-0.193826	-0.428115	0.899268	-0.797331	0.612709
DIXDC1	-0.8019	3473	0.697	0.8721	2060	0.385	-1.16	4097	0.831	-0.7864	3423	0.6914	-0.8963	3507	0.7062	1.09	1173	0.2253	-0.809	2983	0.604	0.9476	1625	0.3128	-1.08	3707	0.7569	0.725646	0.301443	0.340786	0.362916	1.0668	0.775122	0.728625	1.23171
DKC1	-0.7484	3339	0.673	1.17	995	0.176	-1.16	4101	0.836	0.9976	1440	0.2704	-0.7248	3051	0.6024	0.998	1481	0.2791	-1.01	3676	0.734	0.6947	2379	0.4743	-0.5676	1816	0.3301	-0.857698	-1.48368	-2.13809	-0.831491	-1.15711	-1.37956	-1.86852	-1.82227
DKFZP434E1119	1.02	1548	0.268	0.9936	1618	0.298	0.8889	1481	0.267	0.8378	1981	0.3919	1.42	251	0.0476	-0.9159	3826	0.7715	1.37	367	0.064	-0.822	3490	0.7041	-1.23	4293	0.863	-0.12414	0.273817	0.740989	1.41045	-0.101649	0.95947	0.945551	0.691008
DKK1	0.9106	1884	0.34	0.9373	1808	0.337	-0.5778	2515	0.489	-1.28	4556	0.9087	0.8905	1601	0.3097	-0.6329	3103	0.6287	-0.7196	2721	0.549	1.29	537	0.0967	0.972	781	0.1521	1.27581	0.405181	0.504167	0.515352	0.498864	-0.48302	0.661069	0.594337
DKK2	1.34	527	0.074	1.29	588	0.093	-1.22	4268	0.87	1.24	630	0.1196	0.961	1373	0.2709	-0.8559	3675	0.7424	1.52	159	0.026	1.08	1178	0.2201	0.9052	926	0.1818	-0.710916	-1.17266	-0.585532	-1.19251	-1.91732	-0.15739	-1.09811	-0.920348
DKK3	-0.9708	3850	0.791	-1.11	4217	0.865	-0.7894	3009	0.598	1.25	607	0.1153	1.08	1070	0.2034	1.43	201	0.0349	0.6547	1918	0.39	0.9934	1486	0.2811	-0.9842	3232	0.6541	-1.09473	-1.51987	-2.86608	-1.81299	-2.0778	-1.00141	-1.26671	-1.42376
DKK4	-1.35	4505	0.933	-1.17	4327	0.887	-1.33	4566	0.924	0.9956	1447	0.2833	0.9691	1349	0.2657	-0.9696	3963	0.7956	1.23	619	0.112	1.16	943	0.1725	0.9621	801	0.1562	-0.461198	0.224701	0.46596	0.469837	-1.01247	1.40691	-0.296999	0.045919
DLAT	1.15	1099	0.182	1.11	1206	0.212	-0.5442	2459	0.478	0.9769	1506	0.2832	-0.8289	3330	0.6666	1.37	307	0.0612	-0.5774	2394	0.468	-1.39	4737	0.945	-1.13	3898	0.7763	-0.595147	-0.347918	-0.631166	0.109122	0.135358	0.124093	0.800267	0.747108
DLD	-1.28	4397	0.914	1.36	408	0.061	-1.39	4688	0.945	1.25	593	0.1059	0.9374	1440	0.2936	0.6675	2499	0.5055	0.8958	1320	0.272	0.6414	2504	0.4929	-1.47	4910	0.9783	0.630708	-0.015934	-0.484233	0.570183	-0.78662	1.31441	-0.084974	-0.035587
DLG4	-0.6636	3171	0.625	-1.19	4369	0.896	0.7747	1786	0.33	1.29	508	0.0896	1.14	894	0.1691	1.05	1303	0.2504	1.51	169	0.027	1.13	1038	0.194	-1.02	3417	0.6917	-0.035198	-0.073231	-0.709722	-0.078963	-1.1675	0.42281	-0.243092	-0.726529
DLG7	1.51	175	0.023	-0.7432	3410	0.692	1.63	80	0.011	-1.31	4616	0.9227	-1.34	4640	0.9308	0.6939	2420	0.4939	-1.3	4571	0.908	-1.76	5033	0.9971	-1.13	3905	0.7782	-1.12798	-1.38451	-0.495755	-0.80777	0.190511	-0.445333	-0.9007	-0.867268
DLL1	-0.7631	3376	0.675	-1.12	4248	0.871	1.34	447	0.071	0.8085	2074	0.4123	-0.9662	3705	0.7508	-1	4043	0.8127	0.7452	1713	0.344	0.8142	2030	0.3952	1.17	468	0.0842	0.468338	0.961788	0.890506	0.511067	0.125604	-0.851349	0.162541	0.664634
DLL3	0.7178	2456	0.468	0.9957	1612	0.297	-1	3642	0.736	0.68	2467	0.4956	0.8122	1848	0.36	1.31	427	0.0799	-0.7268	2742	0.554	1.26	602	0.1108	-0.7747	2381	0.4707	0.466513	-0.607251	-0.801931	-0.798094	-0.717487	0.075332	-0.968453	-1.2839
DLL4	1.33	546	0.079	-0.8984	3784	0.78	1.82	16	0.001	-1.47	4841	0.9637	-0.969	3710	0.7531	-1.12	4297	0.8621	0.7273	1750	0.341	-0.9496	3827	0.7728	-0.7001	2109	0.4037	-0.441231	-0.38318	0.585107	-0.146865	-0.524362	1.01469	0.693241	-0.227531
DLST	1.33	529	0.077	0.8945	1979	0.375	0.7817	1766	0.327	-0.7979	3454	0.6934	-0.5849	2738	0.539	-0.7413	3354	0.6761	-1.12	4065	0.813	0.5077	2730	0.5491	-0.7346	2230	0.4252	-0.417844	-1.64814	-1.08712	-0.071781	-0.063204	-0.795511	-0.99776	-0.17758
DLX1	1.18	989	0.158	-0.7319	3378	0.678	1.08	982	0.172	0.744	2287	0.4554	0.9901	1295	0.2536	-0.6836	3220	0.6511	1.6	83	0.012	1.04	1315	0.2467	-0.6927	2085	0.4135	1.36684	1.608	1.33248	1.56133	-0.111772	0.813304	1.57507	1.18157
DLX3	1.36	461	0.064	1.31	538	0.085	0.6344	2131	0.403	1.39	273	0.0417	1.05	1151	0.2294	1.16	886	0.1655	1.07	954	0.187	1.31	477	0.0789	-1.04	3524	0.7192	0.011336	-1.0064	-0.460323	-0.632831	-1.21636	0.933238	-0.545701	0.904388
DLX6	0.7446	2378	0.452	0.9579	1739	0.324	-1.4	4723	0.952	-1.09	4174	0.845	-0.9511	3672	0.7434	0.9208	1740	0.3449	-1.43	4806	0.961	-1.64	4994	0.9901	-0.7895	2430	0.4831	-0.287357	-0.613535	-1.21485	0.057874	0.392083	-0.624125	-0.399915	-0.456197
DMC1	-0.924	3763	0.776	0.876	2047	0.388	-1.33	4568	0.923	-0.7752	3387	0.6817	0.6141	2342	0.4624	-1.08	4213	0.8451	-1.27	4511	0.897	0.6076	2578	0.5171	0.5346	1638	0.2941	0.60107	-0.196322	-0.110476	1.26762	0.421048	1.10819	-0.135397	0.650352
DMD	1.13	1156	0.193	0.9205	1873	0.352	-0.7931	3019	0.604	1.01	1385	0.2725	-1.13	4145	0.8388	1.4	263	0.0453	-0.7043	2674	0.539	-0.7974	3422	0.6908	-0.821	2549	0.5068	0.100518	-0.006176	-0.842545	-0.984599	-0.897479	-0.799714	-0.359081	-0.349439
DMGDH	0.8775	1985	0.366	1.23	771	0.131	0.8751	1519	0.274	-0.4716	2868	0.5687	0.5844	2400	0.4729	-1.35	4685	0.9345	-0.6615	2567	0.505	-0.6044	2984	0.594	1.15	498	0.0831	1.20767	1.39867	1.48305	1.69213	1.14003	1.57831	1.24574	1.27412
DNAJA1	0.6784	2566	0.491	1.42	281	0.042	-1.37	4647	0.937	-1.23	4454	0.8946	-1.31	4569	0.9177	-1.34	4674	0.929	-0.8799	3233	0.649	-1.39	4738	0.9452	-0.7142	2163	0.4281	-1.27196	-1.19816	-0.940628	0.088176	-1.00895	-1.42673	-0.700294	-0.913498
DNAJA2	0.8487	2071	0.388	1.18	957	0.166	-1.08	3866	0.788	-1.14	4294	0.8671	0.756	1991	0.3861	-1.36	4704	0.9381	0.4897	2199	0.428	1.01	1432	0.2639	1.54	140	0.0201	0.02295	-1.15508	0.558252	-0.293177	-0.697551	-0.080869	-0.60545	-0.079097
DNAJA3	0.6915	2536	0.483	-1.32	4547	0.93	1.46	263	0.035	1.27	542	0.0921	-1.64	5005	0.9957	1.25	598	0.1082	-1.52	4943	0.989	-0.9696	3873	0.7728	-1.13	3901	0.797	-0.214164	-0.491193	-1.11437	-0.419723	0.384682	0.258084	-0.155094	-0.164071
DNAJA4	0.9648	1715	0.302	-1.08	4162	0.853	0.918	1405	0.253	1.04	1315	0.2555	0.5649	2432	0.4877	0.6136	2632	0.5368	-0.6491	2529	0.511	0.8566	1902	0.3674	-0.8969	2868	0.5744	0.213904	-0.205234	0.078493	-0.712231	-0.588901	0.565183	-0.303087	-0.280515
DNAJB1	0.5143	2845	0.568	-1.63	4912	0.988	1.9	7	0	0.4932	2797	0.5571	0.9107	1530	0.2896	-1.17	4387	0.8814	1.35	402	0.071	0.9419	1645	0.3092	0.6812	1442	0.2589	1.30258	0.891685	0.759771	1.27451	0.400338	0.723787	0.306808	0.132139
DNAJB11	-1.31	4445	0.923	-0.8564	3686	0.747	-0.6331	2616	0.512	1.3	490	0.0858	-1.2	4290	0.8689	1.07	1218	0.2339	-1.08	3912	0.781	1.09	1164	0.2173	-0.6445	1951	0.3882	1.16995	0.853969	0.596361	-0.293133	0.418217	0.400621	0.172283	0.243206
DNAJB2	0.4925	2864	0.561	-0.9661	3941	0.805	1.43	293	0.04	0.9752	1515	0.2986	-1.38	4712	0.9429	1.46	141	0.0258	-1.34	4669	0.929	-1.03	4031	0.8118	-1.24	4347	0.8698	-1.83436	-2.19548	-2.35298	-2.53076	-1.46763	-1.13752	-1.29606	-0.692297
DNAJB4	0.431	2895	0.578	-1.19	4370	0.9	1.12	907	0.156	1.16	888	0.168	0.8307	1787	0.3378	-0.6147	3062	0.6188	0.9245	1259	0.237	0.6518	2474	0.4979	-1.14	3924	0.7831	-1.08272	-1.07407	-0.903766	-0.533665	-0.903295	0.153703	-0.526028	0.101245
DNAJB9	-1.27	4374	0.904	-0.8953	3779	0.769	-0.8361	3152	0.64	0.9893	1468	0.2877	-0.7548	3140	0.6291	1.34	378	0.0685	-1.31	4589	0.916	0.612	2568	0.5092	-1.13	3884	0.7819	-1.78698	-1.4808	-1.44894	-1.6828	-0.571652	0.263603	-1.23869	-0.394594
DNAJC3	-1.5	4725	0.973	0.6873	2641	0.526	-1.29	4442	0.903	-0.5407	2932	0.5799	1.05	1134	0.2052	0.9179	1748	0.34	-1.43	4804	0.957	1.11	1097	0.2012	-1.23	4298	0.8529	0.426719	0.130022	0.129322	0.286056	1.02066	1.05928	0.431108	0.86783
DNAJC4	-1.09	4095	0.85	0.5878	2878	0.572	-1.01	3657	0.747	0.9651	1555	0.3084	-0.7984	3256	0.6556	0.727	2330	0.4776	-1.49	4909	0.984	-0.9534	3831	0.7655	-1.25	4387	0.8896	0.368642	-0.107236	0.201976	0.884496	1.17016	1.41603	0.206508	0.445085
DNAJC5	-0.9069	3718	0.758	0.9576	1740	0.324	-0.8592	3217	0.643	0.8261	2022	0.3998	-1.22	4342	0.8782	0.9686	1589	0.3111	-0.9986	3627	0.728	0.6325	2523	0.498	-1.09	3731	0.7494	1.08887	0.725786	0.384886	0.216851	0.586016	0.67423	0.640363	0.767017
DNM1	1.26	732	0.107	0.8515	2126	0.401	1.06	1045	0.183	1.25	605	0.1153	-0.5779	2722	0.5438	1.34	379	0.0685	0.5547	2126	0.429	-0.9578	3842	0.7752	-1.22	4282	0.8608	-1.94323	-1.01896	-1.33213	-0.595117	-1.31059	0.697689	-1.06723	-1.74297
DNM2	1.1	1270	0.212	0.9599	1731	0.323	-0.708	2799	0.549	1.05	1273	0.2485	1.49	155	0.0259	1.08	1213	0.2328	1.07	952	0.177	1.39	289	0.054	-0.9674	3174	0.6379	0.077425	-2.3494	-1.93187	-0.895483	-1.63244	0.075152	-2.14459	0.070993
DNMBP	1.09	1299	0.22	1.35	429	0.065	-1.4	4719	0.951	0.7179	2370	0.4726	-0.7264	3055	0.6152	1.43	205	0.0354	-0.74	2781	0.562	0.9215	1707	0.3257	-1.21	4211	0.8469	-0.949446	-0.192741	-0.06407	0.419718	-0.168812	0.439847	0.228505	-0.359139
DNMT1	1.19	939	0.155	0.6228	2813	0.558	0.717	1943	0.366	0.9657	1553	0.2912	-0.9363	3626	0.7319	-0.8388	3636	0.7264	-0.6516	2541	0.5	0.7678	2170	0.4304	0.9714	784	0.1405	0.446938	-0.011285	-0.381206	0.402117	0.045038	0.278115	-0.771476	0.426641
DNMT3A	-0.799	3466	0.702	1.28	616	0.105	-1.41	4728	0.948	0.7518	2257	0.4416	-0.837	3352	0.672	1.06	1254	0.2364	-0.401	2241	0.437	1.2	796	0.1447	-0.674	2024	0.385	-0.498048	-1.23286	-0.582974	-1.56178	-0.524136	-0.076041	-1.2889	0.298909
DNMT3B	-0.8783	3637	0.748	0.6986	2610	0.519	-1.19	4172	0.852	-1.8	5036	0.9983	0.8479	1751	0.3374	-1.49	4865	0.9673	-0.8908	3263	0.657	0.8077	2052	0.3988	1.79	26	0.0034	0.937116	-0.789077	0.518322	-0.272152	-0.243614	-1.00528	-0.931736	-1.46932
DNMT3L	1.61	71	0.009	-0.5744	3095	0.625	0.9884	1221	0.216	-1.01	4007	0.8105	1.42	248	0.051	0.6071	2648	0.5383	-0.972	3535	0.707	1.3	490	0.0919	1.66	64	0.0096	1.32087	0.090565	0.017361	0.056636	-0.340832	-0.534331	-0.718614	-0.930957
DNTT	1.12	1208	0.2	1.25	703	0.113	-1.23	4284	0.874	0.6169	2615	0.5255	-0.876	3448	0.7034	1.19	800	0.1549	-0.7825	2899	0.587	-0.6644	3091	0.6222	-1.07	3654	0.7356	-0.706799	-1.28778	-0.840702	-1.13518	-0.597266	-1.29633	-0.33664	-0.908625
DOCK1	1.06	1404	0.242	-1.07	4154	0.851	1.24	651	0.108	0.9019	1767	0.353	-0.8701	3424	0.6929	1.07	1248	0.2389	-0.8572	3137	0.636	-0.9841	3910	0.7797	-1.18	4113	0.8398	-0.888945	-1.01124	-1.06938	-1.20876	-0.788804	-0.414367	-0.762177	-0.263035
DOCK9	1.57	95	0.012	1.3	563	0.093	-0.8949	3327	0.669	1.1	1074	0.2056	1.33	418	0.0818	0.7717	2206	0.441	1.54	140	0.025	1.19	807	0.1478	0.7101	1380	0.2473	0.638665	0.355364	-0.623399	0.289412	-1.68237	-0.38419	0.302169	0.963316
DOK1	1.41	352	0.048	1.65	36	0.004	-0.7143	2816	0.556	-1.27	4539	0.9119	-0.5925	2749	0.5413	1.02	1395	0.26	-1.11	4019	0.806	0.8712	1858	0.3571	0.9206	887	0.161	0.600825	-0.471391	-0.41584	-0.415586	0.076991	-0.759893	-0.450498	-1.1882
DOK2	-0.9522	3815	0.781	-0.9482	3902	0.796	0.7856	1758	0.324	0.615	2620	0.5263	1.07	1105	0.2096	1.22	687	0.1342	0.6642	1896	0.386	1.08	1177	0.2198	-0.8312	2591	0.5153	0.473398	-0.08638	-0.614406	0.545278	-0.114135	-0.030545	-0.004184	0.129212
DOLPP1	0.9997	1606	0.279	0.8934	1985	0.369	1.19	748	0.128	-1.23	4463	0.8951	1.03	1192	0.2322	0.8048	2077	0.4243	-0.8301	3060	0.618	1.4	273	0.0514	-0.7261	2201	0.4363	1.44865	0.762739	0.320121	0.451401	1.13282	0.407429	0.953087	1.37845
DOT1L	-1.04	4005	0.831	0.7222	2551	0.505	-1.29	4452	0.905	-0.9031	3734	0.7548	1.18	783	0.1465	-0.9413	3885	0.7827	-0.725	2736	0.541	1.37	331	0.0628	-0.9362	3032	0.5977	1.39613	0.786027	1.64621	1.31544	1.35461	1.12729	1.34568	2.02289
DPAGT1	-1.34	4499	0.932	-1.54	4807	0.975	-0.4374	2371	0.455	1.38	293	0.052	-0.4454	2573	0.5174	1.06	1286	0.2469	0.6413	1955	0.396	-0.9973	3946	0.7945	-0.943	3062	0.6158	1.06919	1.32384	0.611232	1.37106	1.12505	1.69672	1.52374	1.37376
DPEP1	-1.1	4115	0.849	-1.26	4463	0.914	0.7778	1777	0.328	-1.16	4342	0.8713	-0.5511	2682	0.5362	-0.8604	3686	0.7448	-1.13	4085	0.822	-1.07	4094	0.8267	-0.651	1963	0.3914	1.05702	0.418462	0.432275	1.46643	1.13051	1.27338	0.559259	-0.384749
DPF2	-1.51	4732	0.974	-1.74	4981	0.994	1.23	667	0.106	-1.71	5011	0.9927	-0.5421	2673	0.5261	-1.07	4203	0.8417	-1.22	4348	0.869	-0.9832	3907	0.791	1.05	640	0.1162	0.192821	-0.015997	1.13489	0.858102	1.39273	-0.262522	0.555174	0.397067
DPM1	1.42	328	0.046	1.44	249	0.037	1.32	494	0.079	-0.7224	3256	0.6533	-0.7974	3253	0.6473	-0.8006	3521	0.7076	1.42	291	0.05	-0.9565	3839	0.7762	1.2	443	0.0721	-0.444315	-0.282163	-0.245619	-0.195911	-0.719788	-0.702333	0.006852	-0.575149
DPM2	1.06	1374	0.233	1.25	727	0.125	-0.809	3070	0.614	0.8767	1851	0.3579	-0.7014	2986	0.59	0.8577	1937	0.3826	0.7194	1763	0.346	1.33	418	0.0812	-0.754	2303	0.4382	-0.128182	-0.623768	-0.288756	-0.619397	-0.426676	0.081176	-0.2158	-0.466996
DPP4	1.09	1292	0.218	1	1589	0.29	-0.8816	3283	0.658	0.8534	1926	0.3805	-1.2	4295	0.8697	-1.06	4180	0.8351	-0.7562	2830	0.571	-1.4	4754	0.9473	-1.06	3632	0.7284	-0.404898	-0.31014	-0.172563	0.367962	0.80241	0.637276	0.128353	0.27659
DPPA2	-0.8723	3620	0.745	-0.9685	3948	0.816	0.7999	1718	0.318	-1.14	4291	0.8667	-1.04	3903	0.7902	-1.01	4065	0.8185	-1.08	3918	0.782	-1.13	4223	0.857	0.8207	1113	0.2006	-0.239548	-0.225739	-0.228261	-0.088695	0.289042	-0.605989	0.284778	-0.78941
DPPA3	-0.5889	3024	0.597	-0.9151	3826	0.779	-0.3932	2362	0.474	0.832	1997	0.3968	0.6495	2270	0.453	0.9258	1726	0.341	-0.8491	3111	0.629	0.8653	1872	0.3608	-1.1	3778	0.7601	-0.690822	-1.0571	0.064649	0.227355	0.045056	-0.038769	-0.094724	0.502273
DPPA4	-0.9023	3705	0.755	-1.44	4686	0.957	0.8924	1473	0.265	1.02	1353	0.2642	-0.9674	3709	0.7512	0.9261	1724	0.341	-0.6656	2575	0.519	0.9368	1658	0.3159	-1	3302	0.6709	-0.29411	-0.262758	-0.336109	-0.438308	-0.091838	-0.71399	0.412324	0.819614
DPPA5	-0.9679	3842	0.79	-1.13	4256	0.873	1.32	493	0.077	-1.19	4384	0.8751	-0.4946	2610	0.5266	0.9812	1546	0.3034	-1.29	4559	0.918	-1.09	4152	0.8262	-1.25	4371	0.8848	1.86152	1.43248	1.23722	1.62996	1.64386	1.03164	1.83495	1.83502
DPYD	0.6309	2655	0.516	1.44	260	0.037	-1.04	3735	0.755	-1.35	4684	0.9326	1.3	492	0.0907	-1.24	4508	0.8986	0.6289	1975	0.402	0.7089	2344	0.4577	-0.693	2086	0.4136	-1.53155	-1.45331	-0.753496	-1.29529	-1.30751	-1.08635	-0.322877	-0.327102
DPYS	0.7431	2381	0.467	0.7336	2508	0.497	0.8193	1658	0.307	-1.49	4857	0.9668	1.46	194	0.0378	-1.48	4847	0.9662	1.03	1046	0.185	-0.6856	3136	0.63	0.7824	1208	0.2172	0.166462	-0.916987	0.05748	0.662883	-0.461341	-0.631599	0.347403	-0.115888
DPYSL2	1.15	1074	0.176	1.23	802	0.128	-0.8052	3067	0.608	-1.63	4976	0.9878	-1.24	4400	0.8873	-1	4033	0.8116	-0.8769	3218	0.647	-1.2	4362	0.8789	1.42	214	0.0364	-0.53305	-1.43794	-0.970721	-1.08871	-1.00519	-1.6744	-1.23166	-1.46496
DPYSL5	1.46	239	0.032	1.47	216	0.029	-1	3634	0.742	0.7641	2217	0.4418	-0.9488	3662	0.7419	1.2	766	0.1505	0.754	1694	0.339	-1.18	4316	0.8705	1.08	589	0.1144	-0.228468	0.129074	-1.29313	-0.202227	-1.14684	-1.21479	-0.911313	-0.130682
DRAM	-0.5665	2993	0.588	-1.28	4498	0.92	1.37	398	0.06	1.08	1160	0.226	0.8846	1613	0.3145	-0.8882	3764	0.7579	-0.6821	2623	0.527	0.9951	1477	0.28	0.6415	1502	0.2966	1.59676	1.30144	1.3653	1.45127	1.09791	1.40337	1.44055	1.12094
DRD1	-1.55	4801	0.98	-0.8612	3697	0.75	-1.33	4555	0.923	1.63	24	0.0033	-1.22	4358	0.8813	1.19	782	0.1529	-0.867	3172	0.64	-0.7228	3239	0.653	-0.9199	2973	0.595	-2.15525	-2.52724	-2.06952	-2.18651	-1.93145	-2.24598	-1.78196	-1.12738
DRD2	-0.5894	3025	0.606	-0.6705	3245	0.656	-0.8332	3138	0.628	1.18	825	0.1531	1.2	708	0.1347	-1.01	4061	0.8177	1.25	576	0.101	1.43	236	0.043	-0.6584	1981	0.3741	-1.50557	-1.45571	-0.550053	-0.886191	-1.51738	0.73238	-1.88519	-1.35649
DRD3	-1.26	4350	0.907	-0.7821	3498	0.704	-1.12	3990	0.807	-0.8431	3580	0.728	0.9023	1553	0.3043	1.22	709	0.1382	0.6861	1850	0.375	1.19	811	0.1482	-0.8338	2601	0.5179	0.988402	0.190721	0.341521	0.383514	1.08299	-0.409153	1.15979	1.3587
DRD4	0.4585	2880	0.576	-1.01	4027	0.83	1.32	489	0.077	0.9025	1762	0.3364	1.21	686	0.1311	-0.9088	3813	0.7665	-0.3766	2239	0.436	1.47	174	0.0307	-1.09	3724	0.737	0.828767	-0.197508	0.991984	0.553624	0.535597	1.69348	0.359344	1.12057
DRD5	0.8187	2164	0.4	0.8619	2093	0.394	-0.9425	3467	0.698	0.713	2385	0.4764	1.09	1051	0.2068	0.4687	2831	0.5677	-1.07	3873	0.781	1.07	1231	0.2292	-1.3	4554	0.9192	0.03116	-0.926478	0.903679	0.713445	1.00614	0.452845	0.818757	1.65848
DSE	1.08	1325	0.223	-0.92	3839	0.781	1.06	1034	0.197	-1.19	4381	0.8786	1.23	645	0.1245	-1.72	5027	0.9959	0.6371	1968	0.399	0.889	1818	0.3466	-0.5198	1748	0.3424	1.06617	0.249139	1.30001	1.66609	0.792868	0.579545	1.06659	1.20766
DSP	0.6636	2586	0.496	0.8567	2112	0.405	-0.7	2776	0.565	-0.894	3711	0.7534	1.7	22	0.0015	-0.7049	3267	0.6624	0.7164	1767	0.359	1.16	928	0.1713	-1.05	3566	0.7181	1.31725	0.550357	0.09286	0.663161	-0.452819	0.565692	0.690196	-0.0467
DTNBP1	0.9488	1761	0.314	1.24	748	0.119	-1.5	4874	0.978	1.18	821	0.157	-0.6935	2963	0.5972	1.4	264	0.0458	0.9093	1292	0.252	-1.15	4261	0.8594	-0.7963	2454	0.4873	-0.931004	-1.04342	-1.46196	-1.3234	-1.10454	-1.47996	-0.680552	-0.486657
DTX1	-1.38	4545	0.942	-1.68	4952	0.994	1.05	1063	0.188	0.7868	2147	0.4262	1.59	66	0.0096	1.28	520	0.1025	-0.7845	2905	0.589	0.5686	2656	0.5283	-1.2	4176	0.8403	1.11035	1.20106	1.22388	1.13291	1.47889	1.90869	1.50526	2.16022
DTX2	0.686	2551	0.501	0.8362	2169	0.421	1.18	763	0.127	-1.43	4776	0.9522	1.22	671	0.1287	-1.7	5020	0.9932	1.24	600	0.105	-0.8809	3659	0.7367	1.21	418	0.0679	1.26532	1.07067	1.0706	1.7611	0.33062	-0.447254	0.90632	1.08539
DTX3	1.17	998	0.165	-0.9055	3796	0.784	1.03	1113	0.197	0.7629	2224	0.4428	-1.42	4784	0.953	0.9605	1616	0.3167	-1.09	3971	0.794	-1.01	3972	0.7997	-0.5797	1831	0.3604	-0.550219	0.168635	0.220953	-0.065704	0.480072	-0.505406	-0.363465	-1.00246
DTX3L	0.7928	2226	0.428	1.22	831	0.141	-0.8346	3144	0.629	1.18	811	0.1514	0.4589	2536	0.5034	0.6475	2560	0.5207	1.3	480	0.084	1.12	1066	0.195	-1.34	4648	0.92	-1.15878	-0.65535	-1.03266	-1.03614	-0.871767	0.055867	-0.638158	-0.945147
DTX4	1.27	694	0.101	0.9506	1761	0.329	-0.4789	2390	0.461	1.17	851	0.1625	0.877	1641	0.3191	1.21	740	0.1446	-0.7761	2877	0.584	1.24	644	0.1192	-1.23	4321	0.8674	-0.384877	-1.01559	-0.376487	-0.964166	-0.31272	0.119432	-0.99564	-0.099879
DTYMK	-0.7872	3435	0.687	1.43	277	0.039	-1.27	4403	0.894	1.21	725	0.1392	0.8037	1871	0.3659	1.14	959	0.1882	0.724	1755	0.355	-1.07	4104	0.8289	-1.03	3460	0.6993	-1.01888	-1.2526	-1.92244	-0.462858	-0.664306	-1.27964	-0.269605	-0.255275
DUOX1	0.6732	2573	0.507	0.7284	2528	0.501	0.9353	1359	0.242	1.34	362	0.0642	0.9708	1344	0.2649	1.29	476	0.0901	1.11	884	0.16	0.9895	1496	0.2837	-0.9226	2987	0.5974	0.342718	0.976947	0.837234	0.349203	0.16656	1.72686	0.606516	1.296
DUSP1	1.46	237	0.032	1.17	989	0.174	0.5376	2298	0.44	1.17	867	0.1629	-1.1	4055	0.821	1.45	152	0.036	0.821	1522	0.291	0.9388	1655	0.311	-1.05	3573	0.7068	1.1724	1.7313	0.453743	0.882161	0.919478	1.30181	1.25452	1.35363
DUSP10	0.7251	2432	0.478	0.8612	2099	0.4	0.9542	1310	0.234	0.8639	1887	0.367	0.7562	1990	0.386	1.04	1331	0.2478	1.1	893	0.155	1.02	1385	0.2546	-0.8732	2769	0.5394	0.708831	0.927078	1.00192	0.654071	0.285399	1.18687	1.08393	1.02796
DUSP14	-1.2	4269	0.889	-1.94	5037	1	1.29	532	0.087	1.42	220	0.0328	-0.5358	2664	0.5376	0.7618	2234	0.457	-0.5039	2310	0.477	1.22	700	0.1254	-0.8563	2700	0.553	0.405359	0.729864	0.837449	0.037174	0.376444	1.68312	0.487508	0.705208
DUSP4	-0.8256	3521	0.718	-1.52	4792	0.975	1.47	241	0.037	1.13	979	0.1889	-0.7164	3024	0.598	0.5066	2801	0.5691	-0.5645	2373	0.464	0.4585	2766	0.5562	-0.9944	3273	0.6508	0.326393	-0.054956	1.00029	0.835512	1.11956	0.62023	0.462577	1.06761
DUSP6	-1.26	4345	0.907	-0.8235	3604	0.729	-1.08	3893	0.785	-1.61	4964	0.9879	-1.25	4423	0.8931	-0.8737	3723	0.7434	-1.16	4190	0.847	-1.49	4856	0.9735	-1.19	4133	0.8434	0.310645	-0.26211	0.451546	0.536417	1.22206	0.644105	1.01405	-0.402976
DUSP8	-0.5872	3020	0.594	1.16	1026	0.177	-0.7438	2893	0.57	1.08	1144	0.224	-0.7182	3028	0.6113	0.7615	2237	0.4573	1.06	979	0.191	0.943	1642	0.316	1.21	432	0.0879	-0.094549	-0.417349	0.100582	-1.32466	-0.809384	0.054312	-0.3432	-0.392443
DUSP9	0.7374	2394	0.47	0.9189	1879	0.353	-1.14	4034	0.822	-1.01	4017	0.814	1.65	36	0.0078	-0.8618	3692	0.7402	1.49	200	0.033	1.46	185	0.0337	-1.45	4886	0.964	1.03334	0.507551	1.47056	1.06432	0.661092	1.19397	1.58412	1.16774
DUT	1	1592	0.277	0.9399	1795	0.336	-0.7201	2834	0.556	1.45	178	0.0252	-1.35	4649	0.9357	-0.6943	3236	0.6518	-0.7915	2936	0.596	0.734	2275	0.4452	-1.02	3385	0.6968	-3.52377	-1.49458	-0.65526	-1.70131	-0.700847	-0.913631	-0.684977	0.038167
DVL1	0.7165	2461	0.469	1.02	1536	0.278	-0.544	2458	0.477	1.05	1247	0.2458	-0.8892	3489	0.7029	-0.5731	2984	0.6036	-0.842	3092	0.626	-0.564	2911	0.5798	-0.6779	2042	0.4288	-0.100309	0.233763	0.245242	0.987214	-0.132497	0.700107	0.301708	0.361693
DVL2	1.17	1022	0.166	-1.08	4167	0.855	1.52	180	0.022	-0.7081	3227	0.6505	-0.8884	3485	0.7102	-0.7319	3330	0.6767	0.6598	1908	0.388	0.6476	2488	0.4922	0.8664	1014	0.1989	0.222616	0.005102	-0.539986	-0.753912	-0.039022	-1.13227	0.015383	-0.866926
DVL3	1.14	1102	0.181	-1.69	4964	0.994	1.28	581	0.094	1.37	310	0.0551	1.39	301	0.0555	-0.9798	3987	0.8013	1.43	277	0.047	0.8772	1848	0.3529	0.826	1096	0.2188	1.09076	1.4017	-0.660072	1.14404	-0.006862	0.35552	0.416498	1.22193
DYRK1A	1.38	404	0.055	0.7253	2537	0.488	1.29	559	0.09	-0.8189	3510	0.7118	-0.7463	3118	0.6242	0.9691	1587	0.3106	0.6616	1905	0.387	1.28	558	0.1014	-0.6625	1992	0.3981	0.919028	0.464621	0.12077	-0.3887	-0.448405	0.229865	-0.188391	0.25004
DYRK1B	0.8119	2180	0.414	-1.26	4474	0.922	1.28	564	0.09	1.06	1202	0.2318	-0.8972	3511	0.7103	0.833	1993	0.4013	-0.7075	2690	0.531	-0.6329	3030	0.6063	-1.34	4658	0.9214	0.197593	0.124074	0.290589	0.72871	0.306564	0.478662	1.02222	1.70853
DYSF	1.5	187	0.025	1.55	106	0.015	-0.5297	2432	0.473	-0.8522	3597	0.7236	-1.2	4291	0.8699	1.16	915	0.1758	-1.02	3710	0.74	-0.9795	3900	0.7894	-0.7992	2460	0.4764	-0.388034	-0.571902	-1.28489	-1.07038	-0.347846	-0.671894	-0.206397	-0.466694
E2F1	1.05	1417	0.241	-0.7	3312	0.67	0.9797	1246	0.22	0.675	2486	0.4934	1.37	334	0.0662	0.737	2299	0.4662	1.55	123	0.023	0.9146	1729	0.3262	-0.9033	2900	0.5669	1.75046	0.750108	0.499489	0.938444	0.337325	1.31348	2.01774	1.57933
E2F2	-0.6499	3141	0.618	-1.55	4827	0.977	1.09	952	0.167	-0.8528	3598	0.7331	1.5	142	0.0239	0.9499	1637	0.3244	1.27	545	0.096	1.19	828	0.1504	-1.05	3575	0.7194	1.66574	1.33596	0.854059	1.51202	0.044415	1.82331	1.49803	1.1103
E2F3	-1.11	4136	0.859	-1.1	4203	0.867	0.6868	2011	0.383	0.6143	2622	0.5232	-1.46	4866	0.9642	0.8837	1858	0.3656	-1.05	3830	0.762	-1.51	4884	0.9707	-0.6789	2046	0.3878	1.26655	1.69546	0.937312	1.03523	1.52532	0.629839	1.08613	1.27666
E2F4	1.12	1204	0.198	1.14	1105	0.191	-1.08	3897	0.787	-0.7788	3400	0.6911	1.45	214	0.0386	-0.6277	3088	0.6268	1.17	719	0.134	1.22	701	0.1293	-0.8197	2546	0.5064	1.4125	0.551121	1.04094	0.913639	0.251409	1.11319	1.25229	1.63832
E2F5	0.9311	1815	0.326	1.29	601	0.096	1.05	1069	0.189	1.17	856	0.1638	-0.7453	3115	0.6237	1.22	701	0.1366	-1.12	4043	0.812	0.8915	1803	0.3487	-1.3	4546	0.9049	-3.0179	-2.93883	-2.51205	-2.65223	-2.21314	-1.59861	-2.55191	-2.08601
EARS2	0.6983	2521	0.48	0.8937	1982	0.38	0.6335	2133	0.424	-1.02	4035	0.8129	1.09	1021	0.2011	0.7783	2184	0.4464	-0.6093	2451	0.506	1.16	937	0.1715	-0.6728	2020	0.4265	1.16018	-0.874752	-3.02519	0.313576	-0.076475	-0.472182	-0.478398	-0.151187
EBF1	1.51	179	0.02	1.4	315	0.047	-1.19	4183	0.854	0.9541	1592	0.3118	1.14	880	0.1679	0.7006	2398	0.4926	-0.4833	2289	0.458	1.21	747	0.1364	0.9367	854	0.1669	0.543417	-0.066992	-1.15	0.652755	-0.383285	0.115053	-1.32471	-0.188257
EBI2	0.6206	2680	0.521	1.16	1008	0.173	-1.15	4092	0.829	-1.45	4799	0.9569	1.47	185	0.0261	-0.8063	3539	0.7085	1.29	506	0.096	0.6338	2519	0.4966	-0.5588	1806	0.3775	0.676009	0.289728	1.26729	0.615461	-0.361489	0.270805	1.24091	1.31597
EBI3	-1.24	4317	0.906	-1.14	4279	0.88	0.567	2251	0.433	0.987	1478	0.2771	0.7826	1920	0.3691	-1.67	5009	0.991	0.7381	1730	0.336	0.7912	2098	0.4148	-0.5889	1853	0.3383	0.243371	0.28722	0.561731	0.954788	-0.015963	0.609756	0.304744	1.20756
EBP	1.25	783	0.123	1.14	1095	0.192	-0.5999	2551	0.495	1.05	1260	0.2376	0.6928	2171	0.425	1.17	851	0.1649	-1.23	4392	0.877	-0.723	3241	0.6504	-1.03	3481	0.6895	-0.468991	-0.976815	-1.32115	-1.15023	-0.822682	-0.487241	-1.0564	-1.09314
ECE2	1.32	567	0.08	1.1	1255	0.22	0.5906	2216	0.423	0.8457	1948	0.3863	-1.34	4625	0.9273	-0.6155	3064	0.6219	-0.4769	2281	0.457	-1.61	4969	0.9867	-0.6994	2106	0.4178	-0.840885	-0.126674	-0.168862	0.049361	-0.790603	-0.080974	-0.136371	-0.527023
ECGF1	1.23	816	0.13	-1.13	4270	0.879	1.65	68	0.008	-0.755	3338	0.6693	1.19	764	0.1412	-1.44	4798	0.956	0.9815	1129	0.205	1.51	124	0.0201	1.02	683	0.1272	0.726463	0.754459	0.823369	1.26496	-0.295737	0.180847	0.237933	0.172261
ECHS1	1.08	1331	0.224	1.48	212	0.028	-0.4317	2370	0.457	0.9341	1666	0.3142	0.638	2295	0.4527	0.7878	2138	0.4312	0.6471	1935	0.381	0.7127	2328	0.4641	-0.6697	2010	0.3826	-0.561315	-0.972908	-0.544915	-0.398389	-0.446083	0.29452	-0.759209	0.455681
ECSIT	-0.6161	3074	0.614	0.9174	1889	0.355	-0.642	2633	0.515	0.8824	1835	0.3537	0.721	2101	0.4068	-0.6744	3207	0.6452	-0.6397	2508	0.495	1.08	1183	0.2156	1.31	318	0.0508	1.35519	0.407248	-0.09701	0.392454	0.143891	-0.434742	0.065127	-0.719062
EDA	-0.5126	2941	0.577	-0.7356	3385	0.679	-0.5584	2485	0.482	0.8094	2071	0.4117	0.771	1953	0.3843	0.8303	2001	0.406	-0.7102	2700	0.544	-1.1	4169	0.8425	-1.12	3834	0.7722	-0.634894	-0.110178	-0.57965	-0.601293	-0.025198	1.28913	0.736625	-0.174031
EDG1	-1.27	4369	0.91	-1.81	5014	0.998	1.54	155	0.02	-0.8812	3672	0.7479	1.24	613	0.117	-0.9593	3930	0.7918	0.951	1193	0.231	0.8322	1967	0.3852	-0.801	2475	0.4913	1.77152	1.54865	1.53244	1.85552	1.45517	1.94693	1.79207	1.70874
EDG4	-1.56	4815	0.981	-1.14	4275	0.876	-1.07	3829	0.774	-1.45	4803	0.9575	0.9698	1347	0.2653	0.9934	1498	0.2939	-0.7832	2903	0.587	1.3	501	0.0912	0.7375	1318	0.2601	1.75333	1.52185	1.03918	1.083	1.36952	1.24644	1.19024	1.64485
EDG7	0.4479	2888	0.577	0.8253	2209	0.428	-1.07	3845	0.784	-0.8085	3481	0.6995	-1.25	4430	0.8958	0.6464	2566	0.5213	1.15	774	0.135	-1.3	4581	0.9178	1.07	608	0.1086	-1.05537	-0.530222	-0.957588	-1.18222	-1.37119	-1.08207	-0.759012	-1.77401
EDN1	-1.44	4645	0.958	-1.47	4729	0.968	0.4049	2356	0.454	-0.7962	3451	0.6926	-1.28	4491	0.9043	0.7958	2110	0.426	-1	3653	0.73	-1.27	4508	0.9092	-0.8274	2572	0.4991	0.0091	0.322004	0.673916	-0.623324	0.299151	0.974298	1.11402	-1.10932
EDN3	-0.653	3146	0.619	0.7326	2512	0.484	-1.18	4144	0.844	-0.7936	3443	0.6978	1.25	604	0.1152	-1.25	4540	0.903	0.9296	1241	0.242	1.4	272	0.0513	-0.9046	2907	0.5814	0.275761	-1.49505	0.359698	-0.339934	-0.483802	-0.576	-0.636797	0.038648
EDNRA	-1.11	4132	0.858	0.8119	2259	0.44	-0.7807	2985	0.597	1.58	49	0.0116	-1.42	4796	0.9528	1.23	664	0.1286	-1.01	3679	0.734	0.5863	2629	0.5243	-0.8413	2632	0.5122	-0.805471	-1.33348	-1.77314	-1.55193	-0.450841	-0.316971	-0.861469	-0.576755
EDNRB	0.9266	1829	0.326	0.8836	2018	0.382	-0.6261	2603	0.508	1.03	1337	0.2502	1.39	296	0.0601	0.6432	2570	0.5228	1.69	38	0.007	1.17	887	0.1619	-0.8263	2569	0.4981	0.655245	0.489725	0.434479	1.16781	-0.043561	1.31141	0.644031	0.87619
EEA1	0.9495	1758	0.314	1.14	1077	0.186	-1.08	3896	0.787	1.21	708	0.13	-0.4793	2594	0.5242	-1.56	4930	0.9834	1.17	731	0.142	-0.5426	2877	0.5721	0.954	817	0.1743	-0.179999	-0.035787	0.518663	0.155906	-0.619683	0.476567	0.013794	-0.652284
EED	-1.01	3938	0.819	-0.6217	3156	0.637	-0.9541	3496	0.707	-0.6671	3137	0.6257	1.59	63	0.0149	-1.12	4294	0.861	1.54	144	0.025	1.1	1140	0.209	1.28	355	0.0573	0.821379	0.477334	-0.329369	0.971776	-0.341415	0.10726	0.886152	0.719365
EEF1A2	-0.8371	3553	0.723	-1.18	4353	0.896	1.04	1089	0.193	0.5231	2766	0.5559	0.9267	1471	0.2911	1.24	646	0.1247	0.6439	1943	0.395	0.7608	2195	0.4284	-0.7163	2168	0.4296	1.21809	0.989353	0.626382	1.33603	0.931412	1.33689	1.2333	0.967458
EEF1B2	-0.5471	2968	0.584	1.23	801	0.128	-1.06	3819	0.772	0.8441	1957	0.3874	-0.8609	3409	0.6953	0.8819	1865	0.37	-1.09	3946	0.79	-1.02	4000	0.8051	-0.9684	3179	0.6384	-0.130753	-0.54226	-1.01397	0.604054	0.643978	-0.030652	0.021984	-0.126324
EEF1D	1.6	73	0.009	1.59	79	0.01	-1.55	4925	0.982	-0.5426	2933	0.5855	-1.05	3936	0.7914	1.22	683	0.1338	-1.32	4621	0.921	-0.8352	3522	0.7107	-1.64	5034	0.9963	0.149655	-0.278829	-0.464205	-0.191915	1.26537	0.522315	0.228938	0.880113
EEF1G	0.84	2098	0.387	1.36	413	0.062	-1.13	4006	0.815	-0.9998	3984	0.8005	0.7066	2131	0.4255	-0.8278	3600	0.7206	-1.19	4256	0.862	-0.7217	3232	0.6472	-0.8602	2715	0.5559	-1.35438	-1.31485	-0.887136	-0.307284	-0.588287	-0.518122	-0.889359	-1.62258
EEF2	0.7352	2401	0.456	-1.53	4798	0.973	1.17	793	0.137	-1.09	4195	0.8477	1.51	125	0.0211	1.08	1181	0.2263	-1.01	3687	0.735	-0.7269	3246	0.6545	-1.53	4986	0.9877	-1.17112	-2.35885	-2.02483	-0.82452	-0.637058	-0.506273	-1.25436	-2.41186
EEF2K	-1.5	4719	0.968	-1.23	4430	0.909	-0.7895	3011	0.598	-1.52	4897	0.9732	-0.7905	3228	0.6486	-1.27	4562	0.9081	-0.8941	3278	0.66	-0.5783	2940	0.5865	1.36	266	0.048	1.465	1.3592	1.26548	1.06252	1.33482	0.500252	1.31363	0.599281
EFNA1	-1.33	4479	0.927	-1.07	4142	0.849	-1.41	4734	0.954	-1.09	4194	0.817	-1.33	4616	0.9365	0.6168	2625	0.5104	-1.19	4266	0.871	-1.13	4229	0.8299	-0.7654	2343	0.4829	-0.779049	-0.614294	-0.409858	1.12645	0.539951	-0.660818	0.24859	0.220778
EFNA2	-1.24	4319	0.906	-1.24	4432	0.914	-0.634	2618	0.511	-1.58	4943	0.9803	0.8726	1656	0.3119	-1.02	4088	0.8218	-1.12	4046	0.81	1.23	677	0.1286	1.38	244	0.0385	1.64641	-0.545	0.018167	0.565456	-0.003683	-0.622818	-0.01846	-0.803942
EFNA3	1.01	1553	0.268	-0.9636	3937	0.804	0.8901	1477	0.267	1.16	896	0.1699	-1.42	4788	0.9592	1.11	1092	0.2087	-0.9567	3487	0.703	-1.28	4548	0.9074	-0.9851	3236	0.6682	-0.771427	0.062848	-0.510949	0.018895	0.512705	0.787129	0.333942	0.441099
EFNA4	0.6853	2554	0.487	-1.4	4643	0.949	1.49	211	0.028	1.28	521	0.0941	-1.38	4708	0.9421	1.29	484	0.0917	-1.59	5001	0.992	0.6758	2414	0.4778	-1.02	3416	0.6916	-0.213876	-0.085142	0.301277	-1.68493	0.490013	-0.0649	-0.170756	1.31092
EFNA5	-0.6379	3112	0.622	1.12	1190	0.208	-1.44	4786	0.957	0.9765	1507	0.2834	0.836	1774	0.3337	-0.9079	3810	0.766	1.73	23	0.005	0.8293	1973	0.3868	1.1	553	0.0992	1.01432	1.23973	1.23213	1.52346	0.12327	0.71938	1.27121	0.903988
EFNB1	0.8571	2047	0.381	1.17	994	0.175	-1.47	4838	0.967	1.14	930	0.1788	-1.3	4543	0.9138	1.55	61	0.0168	-0.8108	2989	0.597	-1.7	5021	0.9944	-1.08	3702	0.7331	-1.47793	-1.84261	-1.93456	-2.45359	-1.26638	-1.26658	-1.02149	-0.147641
EFNB2	-1.17	4230	0.88	-1.29	4501	0.921	-0.6089	2570	0.499	-0.8759	3657	0.7452	0.572	2417	0.4856	-0.5241	2930	0.5935	-1.06	3844	0.765	0.8625	1878	0.3624	-0.6806	2049	0.407	0.780021	0.091648	-0.080454	0.656626	0.350256	-0.252367	-0.20717	0.506448
EFTUD2	-1.52	4743	0.974	1.22	819	0.131	-1.65	4985	0.995	-1.48	4846	0.9637	-0.9039	3529	0.7191	0.7906	2131	0.434	-1.31	4587	0.916	-0.8497	3568	0.7184	0.6136	1557	0.3061	-0.678664	-4.14701	-3.68859	-1.29272	-1.5971	-2.43915	-2.95272	-2.6441
EGF	0.9219	1846	0.329	-0.8599	3693	0.758	1.15	823	0.139	0.9437	1637	0.3071	-0.6923	2962	0.5862	0.6379	2586	0.5248	-0.606	2446	0.478	1.33	411	0.0795	-1.27	4429	0.8783	1.1629	0.686183	0.913482	0.588065	1.06645	0.996757	-0.025746	0.427262
EGFR	-0.6551	3154	0.62	-0.6431	3194	0.636	-0.6578	2672	0.523	-0.627	3055	0.6143	-1.2	4315	0.8722	-0.6478	3143	0.6359	-0.8253	3042	0.614	0.7608	2194	0.4284	0.9487	827	0.1612	0.464522	0.243018	0.14207	1.01933	0.751798	-0.748285	-0.639853	0.570629
EGLN1	1.37	450	0.063	1.43	264	0.039	0.684	2016	0.384	-0.6954	3201	0.6392	-1.11	4095	0.8287	1.03	1373	0.2548	-1.58	4994	0.989	-1.03	4035	0.8168	0.7713	1234	0.2217	0.208143	0.196347	-1.1672	-0.194281	0.188072	-0.236398	-0.320498	-0.018445
EGLN3	1.62	54	0.006	1.2	904	0.144	0.8628	1548	0.283	-1.03	4059	0.82	0.952	1396	0.276	-0.7711	3434	0.6975	0.8658	1395	0.278	0.8153	2027	0.3945	0.9935	734	0.1439	0.057145	-0.031108	0.739913	-0.316813	0.059178	-0.636719	-0.254819	-0.626704
EGR1	1.02	1542	0.264	1.01	1551	0.281	0.8262	1630	0.303	1.14	926	0.1782	0.8942	1589	0.2995	-1.11	4282	0.8583	0.9925	1106	0.2	1.12	1067	0.1959	0.6394	1507	0.2737	-0.228788	0.018441	0.689034	0.805723	0.679296	1.57605	-0.138754	0.8404
EGR2	1.39	396	0.054	0.7137	2579	0.511	1.24	646	0.103	1.32	420	0.0825	-0.5241	2645	0.5219	-0.6934	3235	0.6525	1	1089	0.196	-1.13	4225	0.8576	1.17	469	0.0785	1.34024	1.302	0.250811	1.57449	0.612169	1.13246	0.159758	-0.207232
EGR3	1.45	262	0.035	1.31	527	0.084	0.5216	2309	0.442	-0.8861	3688	0.7505	-0.5807	2731	0.5445	1.12	1027	0.1997	-0.7604	2842	0.574	-1.28	4525	0.907	-1.21	4227	0.851	-0.654229	-0.951203	-0.918063	-1.04822	-0.414363	-0.729394	0.131762	0.026435
EGR4	0.6275	2663	0.531	1.25	701	0.12	-1.48	4855	0.969	1.5	108	0.0245	-1.02	3850	0.781	0.9176	1750	0.3402	0.8287	1498	0.286	-1.11	4200	0.8528	1.7	51	0.0073	-0.570779	1.19332	0.119434	0.597448	0.25512	1.05902	-0.002957	-0.447053
EHD2	0.9201	1849	0.33	-0.5942	3120	0.629	0.5928	2208	0.424	0.6832	2452	0.4884	1.15	879	0.1615	0.8753	1893	0.3704	-0.9829	3581	0.716	0.9174	1718	0.3241	-0.9013	2885	0.5663	1.1784	0.947399	1.25584	1.26126	1.3425	1.60637	0.640995	1.93311
EHHADH	1.37	453	0.062	0.8948	1978	0.369	1.53	167	0.021	1.01	1379	0.2702	-1.19	4274	0.8649	1.12	1060	0.205	-1.29	4554	0.91	0.5253	2709	0.5384	-1.18	4099	0.8249	-0.375987	-0.706922	-1.03575	-1.316	-0.45964	-0.987367	-1.05764	-0.893109
EHMT1	0.8918	1936	0.353	-0.6975	3305	0.662	0.6462	2102	0.398	0.8102	2067	0.4108	-1.34	4633	0.9287	1.41	225	0.0402	-1.08	3926	0.784	-0.5803	2945	0.5872	-0.8059	2487	0.4947	-1.02233	-1.61859	-1.29584	-1.38358	-0.639461	-1.11283	-1.29744	-1.75012
EHMT2	-1.7	4940	0.994	-0.7479	3419	0.694	-1.15	4082	0.831	1.28	532	0.0891	0.6924	2174	0.433	1.31	438	0.0762	1.28	526	0.099	-0.5474	2888	0.574	-0.8854	2819	0.5785	0.037201	1.85583	0.927595	1.26571	0.779016	1.94722	1.44132	1.24204
EI24	-1.29	4420	0.917	1.2	890	0.142	-1.54	4920	0.985	-0.7497	3327	0.6748	-1.56	4961	0.9851	0.7752	2192	0.4433	-1.22	4336	0.871	-1.64	4992	0.9901	0.743	1305	0.2576	-0.87891	0.819829	0.788038	0.122685	0.971601	-0.601869	0.744714	0.460739
EIF1	-1.26	4343	0.907	0.6193	2820	0.549	-1.19	4170	0.851	0.9581	1578	0.3093	0.6165	2335	0.4691	0.6389	2582	0.525	0.7259	1753	0.354	1.32	448	0.0841	-0.6503	1959	0.3911	-0.83497	-0.342842	-0.151075	-0.689829	-0.457388	-0.476182	-0.851449	-0.747869
EIF1AX	-1.61	4871	0.989	-1.05	4099	0.841	-1.21	4224	0.862	1.35	341	0.0609	0.8203	1819	0.3545	1.47	133	0.0238	0.6556	1915	0.39	1.02	1378	0.2595	-1.32	4608	0.9198	-2.45837	-3.46788	-3.27234	-3.13153	-2.19116	-0.294854	-2.06132	-1.66114
EIF1AY	-1.12	4156	0.86	0.8924	1988	0.37	-1.21	4244	0.866	-1.38	4710	0.9391	-1.36	4675	0.941	-0.7662	3420	0.6873	-1.37	4721	0.951	-1.16	4288	0.8533	-0.83	2587	0.5327	0.520798	-0.059043	-0.185977	0.80394	0.922156	0.355439	-0.272392	-0.122475
EIF2AK1	1.28	663	0.103	1.33	493	0.078	-0.9795	3566	0.726	0.8044	2091	0.409	0.9143	1513	0.2882	-0.5949	3019	0.6114	1.53	145	0.025	-0.9131	3748	0.7532	1.07	610	0.1087	0.032415	-0.152069	-0.191409	-0.802612	-0.898461	0.391913	0.297177	-0.576603
EIF2AK2	0.8903	1943	0.355	0.6618	2707	0.54	1.58	116	0.017	-1.27	4550	0.9128	-0.9281	3603	0.7276	1.15	925	0.1784	-1.05	3823	0.761	-1.27	4524	0.912	0.9851	746	0.1365	0.258705	-0.421484	-1.35322	-0.95517	-0.387077	-0.324501	-0.604528	-1.39657
EIF2AK3	-1.43	4629	0.956	0.5834	2888	0.563	-1.27	4392	0.893	0.5494	2728	0.5232	1.24	631	0.1109	-1.15	4344	0.8447	0.9987	1092	0.229	1.18	860	0.141	0.6582	1475	0.3302	0.378508	-0.270306	-0.035597	0.100284	-0.541885	0.353531	-0.474035	-0.222164
EIF2AK4	0.8871	1951	0.355	0.7717	2394	0.457	0.7691	1802	0.334	0.8499	1936	0.3829	-1.05	3948	0.7922	0.7344	2308	0.4728	-1.44	4833	0.965	-1.67	5006	0.9924	-1.07	3659	0.7366	-1.30482	-0.290638	-0.625926	0.656637	0.100979	0.296614	0.473316	-0.833757
EIF2B1	-0.6761	3194	0.631	0.8282	2195	0.417	-0.9818	3577	0.724	1.25	612	0.1099	1.37	328	0.0544	0.9191	1743	0.3502	1.02	1073	0.21	1.11	1082	0.1998	-1.32	4615	0.929	-0.574939	-1.5122	-1.38555	-0.244875	-1.36394	0.163666	-0.646532	-0.482141
EIF2B2	1.11	1240	0.204	0.7919	2315	0.444	1.29	533	0.087	0.7333	2324	0.4623	-0.8215	3315	0.6701	1.34	376	0.0681	-1.47	4875	0.974	-0.5056	2833	0.5679	-1.25	4389	0.8786	0.091978	-1.49706	-1.86115	-1.1727	0.034403	-0.469811	-0.867949	0.141302
EIF2B4	-1.41	4588	0.95	-0.6411	3191	0.634	-1.34	4583	0.926	-1.24	4475	0.8941	0.6861	2186	0.4359	1.01	1458	0.2853	-1.49	4901	0.983	-1.26	4494	0.8955	-0.716	2167	0.4513	1.23377	-1.24866	-2.16241	0.858535	-0.021601	0.50393	-0.56188	-0.028872
EIF2B5	-1.51	4731	0.972	-1.07	4143	0.849	-1.27	4406	0.895	-0.7345	3286	0.663	0.8557	1722	0.3417	0.5946	2689	0.5346	0.6192	2004	0.419	-1.16	4294	0.8545	-0.9987	3291	0.6799	-0.326698	-1.33488	-2.24016	1.12873	-0.249316	-0.589348	-0.760475	0.265804
EIF2S1	-1.25	4341	0.906	-1.58	4861	0.982	-0.7274	2853	0.56	0.8547	1918	0.3798	-1.36	4673	0.9352	1.12	1037	0.2016	-1.26	4463	0.893	-1.35	4676	0.9339	-0.6039	1874	0.3713	-0.588275	-1.67758	-2.69984	0.166377	-0.791533	-1.61903	-1.77144	-0.980334
EIF2S2	-1.58	4844	0.993	-0.7465	3416	0.667	-1.55	4923	0.995	1.11	1038	0.2017	-1.6	4985	0.9896	1.03	1388	0.2663	-1.28	4533	0.907	-1.6	4965	0.9864	0.5822	1594	0.3137	-4.86523	-3.67138	-5.00398	-2.83203	-3.48263	-4.67915	-4.70678	-3.21242
EIF2S3	-1.77	4975	0.998	-1.2	4377	0.896	-1.44	4787	0.963	-0.9189	3782	0.7679	-0.6078	2774	0.5566	0.6186	2620	0.535	-1.04	3807	0.758	-0.9496	3826	0.7709	-1.03	3450	0.6981	0.802222	0.210255	-1.61666	1.56202	0.562859	-0.813455	-0.250152	0.493635
EIF3H	-1.2	4275	0.891	0.5204	2975	0.581	-0.8594	3218	0.643	0.7543	2246	0.4535	0.7017	2146	0.4281	1.21	727	0.1365	-0.9634	3507	0.709	0.4983	2742	0.54	-1.29	4536	0.9156	-0.201304	-1.10259	-1.27805	-1.44604	-1.00239	-0.345838	0.164389	0.306519
EIF4A1	0.8477	2074	0.382	1.5	171	0.02	-1.36	4637	0.936	1.62	29	0.0023	-1.43	4812	0.9629	1.19	804	0.1484	-0.648	2524	0.522	-0.9083	3732	0.7442	-0.5598	1808	0.3778	-0.972055	-0.172125	-1.39725	-0.764549	-0.806729	-0.585372	-1.26075	-0.651555
EIF4A2	1.22	853	0.131	1.09	1271	0.223	1.06	1042	0.183	0.5881	2671	0.5377	-1.45	4839	0.9616	0.975	1570	0.3054	-0.9629	3506	0.705	-0.507	2836	0.5686	-1.49	4938	0.9806	0.690744	0.772906	0.267286	0.521792	0.777615	0.875102	0.476087	0.472608
EIF4B	-0.637	3110	0.612	-0.5812	3102	0.616	-0.9998	3627	0.734	1.54	75	0.0123	1.63	47	0.0059	1.26	581	0.1151	0.9781	1136	0.218	1.5	140	0.0225	-1.05	3546	0.7149	-0.364665	-1.55381	-0.85098	-0.869925	-1.20198	-0.007033	-1.306	0.837326
EIF4E	0.4908	2865	0.561	-1.34	4574	0.935	1.11	913	0.158	-0.9336	3815	0.7665	-1.21	4317	0.8719	1.18	837	0.154	-1.47	4877	0.98	-1.08	4133	0.8215	-1.29	4511	0.9127	0.649012	-0.048818	-0.833858	0.799855	1.13998	0.626581	0.513259	0.390938
EIF4E2	-1.77	4977	0.998	-1.56	4844	0.98	-1.05	3763	0.761	-1.11	4222	0.847	1.34	399	0.0702	-1.62	4985	0.9899	-0.8165	3008	0.609	1.09	1146	0.2114	-1.18	4092	0.836	1.10957	0.560257	0.942799	0.861152	0.948109	0.952003	0.035654	0.89444
EIF4EBP1	-1.45	4658	0.959	0.8169	2243	0.425	-1.05	3793	0.767	-1.49	4860	0.9653	1.27	546	0.1025	-0.9351	3870	0.7803	-0.8834	3247	0.652	0.8683	1867	0.3656	-1.04	3509	0.7073	-0.085079	-1.13253	-0.910301	-0.833379	-0.383295	-1.27946	-0.82257	-1.4635
EIF4EBP2	-1.01	3926	0.818	-1.16	4318	0.887	-0.8403	3167	0.632	0.9303	1676	0.3168	0.8193	1824	0.3457	-1.31	4620	0.9239	-0.8669	3171	0.633	1.01	1426	0.2635	1.27	363	0.0578	1.41629	1.20341	1.63342	1.73667	1.32272	1.30449	0.754687	0.963054
EIF4G1	1.38	425	0.057	1.26	665	0.108	-0.7678	2959	0.586	-1.05	4092	0.827	-1.17	4234	0.8582	1.08	1205	0.2316	-1.43	4821	0.964	-0.8564	3587	0.7219	-1.23	4296	0.8636	-0.360153	-1.66268	-2.25533	-1.04214	-0.92545	-1.56245	-1.77967	-1.47582
EIF4G2	-1.54	4780	0.978	-1.75	4983	0.997	1.32	497	0.078	1.48	134	0.0241	1.35	376	0.0679	0.9789	1556	0.303	1.41	308	0.053	0.5987	2607	0.5155	0.7582	1263	0.2497	0.942788	0.409351	-1.4644	1.02252	-1.10006	-0.292519	-0.148809	1.47301
EIF4G3	1.28	657	0.096	0.9384	1801	0.336	-0.5621	2492	0.483	0.9981	1438	0.2814	0.5355	2466	0.4954	1.33	385	0.0689	-1.2	4301	0.863	-0.9081	3731	0.7516	-0.903	2898	0.5797	-1.03855	-2.33421	-2.11712	-0.941471	-1.50936	-0.676462	-1.71846	-0.604375
EIF5	0.9805	1670	0.293	1.49	185	0.022	-1.27	4393	0.893	-0.7538	3335	0.6769	1.16	829	0.1597	-0.9237	3846	0.7756	0.969	1154	0.223	0.7892	2104	0.4115	-0.8534	2688	0.5359	-0.660284	-1.38942	-1.28989	-0.441133	-1.11581	0.11487	-0.09274	-0.714683
EIF5A2	-0.996	3904	0.804	-1.52	4794	0.973	1.29	535	0.087	-0.8105	3489	0.7018	0.868	1669	0.3339	-1.25	4516	0.8956	1.33	427	0.079	-1	3958	0.7882	0.8053	1158	0.2459	-0.99883	-0.124725	0.04045	0.735437	-0.689253	0.336831	0.207085	-0.653358
ELA1	1.16	1053	0.172	1.4	319	0.048	-1.15	4066	0.825	1.52	96	0.0154	0.9502	1400	0.2771	-0.9061	3805	0.7674	1.29	496	0.088	1.33	420	0.0812	-0.5607	1809	0.3547	-1.33956	-0.861442	-1.02884	-0.689602	-1.2468	-0.039498	-1.39743	0.217948
ELA2	-0.8289	3530	0.712	-1.19	4367	0.895	1.04	1092	0.195	-0.6688	3143	0.6337	1.71	18	0.001	0.8995	1811	0.3589	0.7364	1734	0.348	1.2	794	0.1449	-1.5	4952	0.9825	1.33789	0.694549	1.1232	1.5116	1.47338	1.46917	1.40444	1.98514
ELA2A	0.9629	1719	0.304	1.27	659	0.107	-1.26	4368	0.888	-0.6745	3158	0.6359	0.7117	2123	0.4199	1.05	1328	0.2547	0.5354	2149	0.434	0.8053	2063	0.4004	-0.9482	3088	0.6214	1.4249	0.906432	0.351457	1.08116	0.33452	0.895186	0.740578	1.73638
ELA2B	1.05	1409	0.243	1.32	508	0.078	-1.25	4355	0.887	1.18	831	0.1589	-0.7645	3162	0.6342	1.41	233	0.0407	1.2	666	0.121	1.32	440	0.0832	1.13	523	0.0979	0.797402	0.882087	-0.057582	-0.582019	-0.626863	-0.527835	-0.35449	1.3455
ELA3A	1.16	1028	0.166	-0.9328	3868	0.788	1.46	262	0.034	0.6781	2474	0.4968	-1.3	4544	0.9125	1.55	57	0.0106	-0.5737	2386	0.48	-0.5221	2855	0.571	1.63	84	0.0145	1.52616	1.26322	-0.374944	0.327012	0.542054	-0.890224	-0.123439	0.459216
ELA3B	-1.43	4636	0.956	-1.11	4226	0.861	-1.21	4226	0.87	-1.23	4459	0.8827	1.32	436	0.0672	0.9627	1613	0.3032	1.19	678	0.135	1.1	1127	0.1979	1.34	283	0.0601	1.86345	0.869615	0.359677	1.47935	0.792466	1.18043	1.23276	1.08966
[truncated: 3,360 more rows]
