# Supplementary material for: MDM4 Is Targeted by 1q Gain and Drives Disease in Burkitt Lymphoma
Source: Oxford University Press journal article supplement (doi:10.1158/0008-5472.can-18-3438), 2019-04-18
Supplement: 00085472can183438-sup-211452_2_supp_5441217_ppfxkv.xlsx [file 00085472can183438-sup-211452_2_supp_5441217_ppfxkv.xlsx]

## Sheet: TP53mut_vs_wt_GENE-E
Supplementary Table 7. GENE-E ranking of genes with differential shRNA counts in TP53mut vs TP53wt Cell lines from the Achilles screen combined and by cancer type.
Gene	ALL_TP53mut_vs_TP53wt_KS_score	ALL_TP53mut_vs_TP53wt_KS_rank	ALL_TP53mut_vs_TP53wt_KS_pvalue	ALL_TP53mut_vs_TP53wt_KS_pvalue rank	bone_TP53mut_vs_TP53wt_KS_score	bone_TP53mut_vs_TP53wt_KS_rank	bone_TP53mut_vs_TP53wt_KS_pvalue	bone_TP53mut_vs_TP53wt_KS_pvalue rank	breast_TP53mut_vs_TP53wt_KS_score	breast_TP53mut_vs_TP53wt_KS_rank	breast_TP53mut_vs_TP53wt_KS_pvalue	breast_TP53mut_vs_TP53wt_KS_pvalue rank	CNS_TP53mut_vs_TP53wt_KS_score	CNS_TP53mut_vs_TP53wt_KS_rank	CNS_TP53mut_vs_TP53wt_KS_pvalue	CNS_TP53mut_vs_TP53wt_KS_pvalue rank	colon_TP53mut_vs_TP53wt_KS_score	colon_TP53mut_vs_TP53wt_KS_rank	colon_TP53mut_vs_TP53wt_KS_pvalue	colon_TP53mut_vs_TP53wt_KS_pvalue rank	haem_lymph_TP53mut_vs_TP53wt_KS_score	haem_lymph_TP53mut_vs_TP53wt_KS_rank	haem_lymph_TP53mut_vs_TP53wt_KS_pvalue	haem_lymph_TP53mut_vs_TP53wt_KS_pvalue rank	ovary_TP53mut_vs_TP53wt_KS_score	ovary_TP53mut_vs_TP53wt_KS_rank	ovary_TP53mut_vs_TP53wt_KS_pvalue	ovary_TP53mut_vs_TP53wt_KS_pvalue rank	pancreas_TP53mut_vs_TP53wt_KS_score	pancreas_TP53mut_vs_TP53wt_KS_rank	pancreas_TP53mut_vs_TP53wt_KS_pvalue	pancreas_TP53mut_vs_TP53wt_KS_pvalue rank	skin_TP53mut_vs_TP53wt_KS_score	skin_TP53mut_vs_TP53wt_KS_rank	skin_TP53mut_vs_TP53wt_KS_pvalue	skin_TP53mut_vs_TP53wt_KS_pvalue rank
MDM4	0.9992	1	-0.0001	1	0.7418	939	0.0936	984	0.9197	25	0.0005	14	0.7606	369	0.038	415	0.9641	3	0	2	0.9903	1	-0.0001	1	0.8686	62	0.0047	73	-0.5809	8698	0.8151	8617	0.7966	292	0.0271	325
MAP2K7	0.9771	2	0.0011	27	-0.8231	10265	0.8962	9504	0.3007	5040	0.4962	5238	0.6817	902	0.2326	2486	0.4519	3391	0.4251	4516	0.6791	822	0.2278	2434	0.7666	373	0.1379	1563	0.6951	992	0.2312	2515	0.8495	101	0.0686	744
SEC1	0.9676	3	0.0029	53	0.3115	5020	0.4934	5243	0.6565	1307	0.2663	2829	0.7338	511	0.176	1918	0.559	2249	0.353	3806	0.5332	2187	0.3556	3820	0.515	2482	0.3701	3884	0.8326	147	0.0827	913	0.7916	318	0.121	1281
FAHD2A	0.9578	4	0.0044	66	0.7555	826	0.1781	1920	0.5981	1889	0.3246	3458	0.3682	4261	0.4676	4964	0.6334	1515	0.2844	3050	0.7193	579	0.1837	2008	-0.4631	7226	0.5574	5864	0.532	2829	0.388	4145	0.7258	683	0.1918	2078
PIGL	0.9508	5	0.0006	19	0.6336	1986	0.2404	2598	-0.615	9015	0.7817	8225	0.5953	1749	0.2407	2581	0.8446	112	0.0239	297	0.5895	1634	0.2278	2435	-0.5325	8032	0.6787	7175	0.4699	3504	0.3772	4067	-0.3271	5773	0.5181	5527
NOP16	0.9481	6	0.0008	20	0.7072	1260	0.1647	1777	0.4316	3701	0.3986	4257	-0.6591	9499	0.8259	8751	0.7832	328	0.0565	665	0.8096	157	0.0357	423	0.6823	978	0.137	1545	-0.6438	9344	0.8092	8551	0.6607	1241	0.1793	1930
WFDC11	0.9473	7	0.0001	4	0.8026	506	0.051	545	0.6061	1815	0.1701	1879	0.6465	1197	0.1216	1295	0.9071	28	0.001	25	0.547	2063	0.1988	2161	0.8201	160	0.0138	190	0.5537	2563	0.2486	2704	0.6159	1673	0.169	1788
ACIN1	0.9363	8	0.0003	7	-0.5319	7697	0.714	7593	0.4824	3112	0.3038	3212	0.6926	799	0.0795	857	0.511	2762	0.2635	2844	0.8298	114	0.0094	109	0.606	1631	0.1536	1730	-0.6052	8980	0.8399	8911	0.6155	1678	0.1692	1795
CNTFR	0.9355	9	0.0001	3	0.7005	1328	0.1024	1087	0.4861	3066	0.2604	2767	0.6141	1532	0.1118	1186	0.5662	2190	0.1609	1809	0.669	919	0.0569	649	0.7342	552	0.0261	322	-0.4986	7871	0.7768	8202	0.2736	5082	0.4694	5000
CD3E	0.9343	10	0.0016	38	-0.9299	10609	0.992	10561	0.659	1282	0.1739	1923	0.7013	738	0.1229	1307	0.4571	3322	0.3641	3905	0.721	562	0.0959	1077	0.7097	756	0.1125	1272	0.7998	275	0.0509	579	0.8607	80	0.0195	251
TRIM50	0.9327	11	0.0123	150	0.6368	1951	0.2997	3219	0.8765	68	0.0434	523	0.8046	210	0.1001	1033	-0.4546	7215	0.5645	5973	0.5541	1988	0.339	3662	0.4672	2994	0.4055	4220	-0.5881	8778	0.6709	7132	0.8037	263	0.1084	1137
CSNK1A1	0.9282	12	0.0003	8	-0.5589	7951	0.7402	7879	0.7587	438	0.0415	500	0.8468	94	0.0082	106	0.2948	4954	0.4785	5052	0.7651	315	0.0306	371	0.9067	22	0.0011	26	0.39	4397	0.4247	4541	0.8427	116	0.0119	133
IFNA21	0.9269	13	0.0143	173	0.861	238	0.0761	803	0.6833	1026	0.2349	2504	0.9769	2	0.0011	19	0.7283	635	0.1852	2069	0.6893	751	0.2167	2329	0.7378	531	0.1701	1884	0.5625	2439	0.3625	3906	0.9259	15	0.0175	221
LEO1	0.9257	14	0.0003	9	0.7413	944	0.0939	990	-0.5679	8527	0.8011	8442	0.6611	1073	0.1079	1125	0.6558	1289	0.1174	1362	0.808	161	0.0158	184	0.7841	287	0.0261	321	0.5979	2019	0.1965	2156	-0.3348	5848	0.5447	5797
ARHGEF11	0.9223	15	0.0025	48	-0.5985	8344	0.7273	7745	0.8565	97	0.0175	219	0.7044	717	0.1191	1258	0.715	750	0.1121	1312	0.6555	1028	0.1581	1756	0.7555	430	0.0722	868	-0.4538	7382	0.6326	6749	0.566	2248	0.2823	2987
TNFRSF12A	0.9222	16	0.0165	192	0.8008	521	0.1322	1434	0.455	3408	0.4326	4580	0.3913	4017	0.4576	4846	0.7717	365	0.1354	1562	0.6362	1208	0.269	2867	0.766	376	0.1384	1570	0.7701	429	0.1478	1609	-0.588	8549	0.6612	7086
CACNG3	0.9203	17	0.0001	5	-0.2889	5544	0.5313	5610	0.2844	5130	0.4785	5067	0.5775	1943	0.1456	1592	0.5846	1992	0.1444	1638	0.5106	2399	0.1896	2061	0.2457	5065	0.4759	5004	0.295	5290	0.4891	5242	0.3742	4303	0.3875	4122
PEF1	0.917	18	0.0192	222	0.7691	731	0.1642	1769	-0.6208	9082	0.7034	7407	0.7456	449	0.1617	1768	0.8441	114	0.0673	801	0.9433	8	0.0083	95	-0.3627	6015	0.5112	5395	-0.8777	10622	0.9578	10201	-0.679	9470	0.7534	8030
AFF1	0.9156	19	0.0001	2	0.5182	3203	0.2752	2959	-0.4196	6888	0.677	7136	0.5832	1888	0.14	1522	0.7608	426	0.0174	231	0.7234	543	0.0276	321	0.6068	1623	0.1131	1283	-0.3846	6659	0.6452	6857	-0.4438	6977	0.6759	7231
JTB	0.9127	20	0.0006	18	0.6342	1982	0.1909	2045	0.5091	2817	0.2772	2936	0.6512	1151	0.117	1240	0.705	838	0.0742	881	0.6658	942	0.0919	1032	0.4179	3534	0.3474	3635	0.3939	4350	0.4206	4509	0.7227	710	0.0711	773
RAB5B	0.9125	21	0.0006	17	0.4515	3811	0.363	3879	0.5624	2282	0.2191	2366	0.7061	700	0.0712	769	-0.7243	10011	0.9396	9973	0.7723	272	0.0279	326	0.5683	1979	0.1922	2089	-0.3301	6124	0.5731	6106	0.527	2660	0.2617	2755
TRIM21	0.9089	22	0.0036	59	0.9069	115	0.0164	199	0.7541	466	0.0786	934	-0.3875	6448	0.5608	5931	0.6673	1177	0.1621	1831	0.8728	47	0.0105	124	0.8074	195	0.0397	489	0.3575	4777	0.4666	4987	0.519	2750	0.3227	3449
SMURF1	0.9079	23	0.0041	61	0.7363	981	0.1361	1469	0.5379	2527	0.3088	3274	0.4059	3842	0.4088	4341	0.5004	2854	0.3294	3566	0.5986	1557	0.2203	2360	0.4737	2920	0.3371	3520	0.4005	4285	0.4354	4649	0.5273	2659	0.3168	3389
PDE4DIP	0.9055	24	0.0252	300	-0.7394	9694	0.8091	8591	-0.4669	7425	0.5811	6144	0.7714	325	0.1346	1463	0.7017	870	0.2144	2357	-0.6016	8767	0.6709	7082	0.7372	535	0.1706	1889	0.6534	1396	0.2775	3008	-0.8894	10605	0.9605	10206
RASGRP2	0.9053	25	0.0003	11	-0.5335	7714	0.7477	7955	-0.3932	6576	0.6452	6800	0.6381	1269	0.0921	965	0.7933	288	0.0097	136	0.7424	437	0.0198	230	0.7376	533	0.0245	304	-0.3597	6393	0.6158	6573	0.7673	436	0.0211	258
RTP2	0.9045	26	0.0013	31	0.7918	586	0.058	621	0.7126	762	0.0705	825	0.6938	792	0.0787	848	0.7664	391	0.0359	408	0.8436	91	0.0076	88	0.6375	1344	0.1255	1412	0.5697	2345	0.228	2489	0.7038	848	0.0838	890
UBE2D3	0.9034	27	0.0003	6	0.4809	3550	0.3116	3336	0.729	631	0.032	385	0.3918	4007	0.3564	3794	0.8392	126	0.0026	49	0.6593	992	0.0636	714	0.8304	137	0.0031	58	-0.466	7519	0.7427	7852	-0.3995	6489	0.6232	6643
DCTD	0.9029	28	0.0015	36	0.5152	3229	0.3046	3270	-0.5022	7816	0.7314	7703	0.667	1016	0.1031	1068	0.5003	2857	0.2758	2956	0.6915	737	0.0718	811	0.5916	1760	0.1691	1868	-0.337	6185	0.5793	6174	0.46	3385	0.3249	3472
C17orf48	0.9029	29	0.0015	33	-0.743	9733	0.9108	9676	0.7605	426	0.0401	488	0.4399	3437	0.3343	3554	-0.3532	6069	0.5693	6017	0.5257	2255	0.2206	2362	0.4398	3273	0.3243	3385	0.2912	5315	0.5067	5406	-0.6485	9171	0.8571	9080
TPX2	0.9015	30	0.0015	35	0.402	4283	0.4079	4345	0.6871	978	0.0891	1051	0.6909	813	0.0809	871	0.756	447	0.0426	484	-0.7128	9904	0.9338	9874	0.7967	236	0.0214	278	0.5917	2096	0.2037	2240	0.5646	2267	0.2213	2376
DPF3	0.901	31	0.0272	322	-0.8551	10422	0.9237	9832	0.8844	58	0.0385	463	0.6333	1303	0.2812	2978	0.7096	795	0.2054	2279	0.8307	113	0.0721	815	0.5532	2097	0.3446	3604	-0.7552	10226	0.8513	9026	0.8155	215	0.0979	1023
ZNF702P	0.8957	32	0.0311	367	0.5602	2758	0.3652	3903	-0.8761	10612	0.9576	10197	0.3006	4894	0.4903	5187	-0.8884	10635	0.9651	10266	0.7937	197	0.105	1173	0.8259	149	0.0813	965	0.7017	930	0.2241	2446	0.886	42	0.0416	480
MRGPRD	0.893	33	0.0003	10	-0.2963	5584	0.5343	5650	0.6446	1428	0.0921	1087	0.5235	2534	0.1998	2178	0.5842	1998	0.1447	1645	0.7381	463	0.021	249	0.3972	3806	0.3397	3548	-0.2788	5759	0.549	5839	0.7396	585	0.0321	377
GCG	0.8912	34	0.0071	90	0.7522	853	0.1208	1310	-0.667	9597	0.8345	8782	0.8991	30	0.0063	74	0.6196	1647	0.2182	2398	0.4304	3280	0.3657	3921	0.6937	863	0.1274	1437	0.6839	1094	0.158	1732	-0.6391	9066	0.7865	8377
MOS	0.8911	35	0.0348	401	0.7535	840	0.1813	1951	0.6148	1734	0.3092	3275	0.8642	63	0.0518	540	0.6715	1139	0.2454	2657	0.9055	17	0.0244	287	0.8463	101	0.0631	773	-0.7366	10104	0.8291	8807	0.6335	1501	0.2905	3073
RAB3A	0.891	36	0.0025	46	0.7243	1082	0.1077	1154	0.7075	800	0.0733	858	0.6344	1292	0.1327	1436	0.76	429	0.04	465	0.7836	231	0.0235	280	0.9361	6	0.0002	7	0.2712	5424	0.5152	5496	0.7344	624	0.0631	704
CRLF2	0.8906	37	0.0071	89	0.7469	899	0.1262	1366	0.9079	33	0.0048	69	-0.5941	8831	0.7527	7962	0.81	224	0.0392	448	0.7717	278	0.057	650	0.7505	462	0.0752	897	-0.3988	6791	0.5877	6265	0.7193	743	0.1182	1241
TRIM23	0.8893	38	0.0025	47	0.6578	1731	0.1691	1825	0.5802	2075	0.1985	2160	0.4082	3820	0.3671	3908	0.6262	1584	0.1449	1649	0.781	241	0.0241	286	0.7296	595	0.0532	649	0.3823	4474	0.4324	4609	0.4283	3726	0.3561	3779
GABRR2	0.8879	39	0.0026	49	0.9442	50	0.0029	48	0.5892	1986	0.1895	2075	0.7511	412	0.0433	463	0.7841	322	0.0276	326	0.7305	503	0.048	539	0.8369	116	0.0093	131	0.3479	4860	0.4624	4942	0.8457	110	0.0109	121
ABCA4	0.887	40	0.0077	95	0.9372	57	0.0078	101	0.5798	2081	0.268	2851	0.681	910	0.1433	1568	-0.3299	5845	0.5219	5527	0.6182	1407	0.1984	2154	0.622	1473	0.2051	2211	-0.3212	6062	0.5336	5681	0.6349	1488	0.2112	2261
SPOCK3	0.8852	41	0.0004	12	0.5028	3336	0.2898	3109	0.4872	3055	0.2588	2753	0.7205	606	0.0343	391	0.4839	3027	0.2502	2709	0.4544	2989	0.2509	2677	0.5925	1753	0.126	1417	-0.583	8722	0.8595	9110	0.672	1128	0.0781	842
REG1B	0.8849	42	0.0027	51	0.614	2177	0.2125	2239	-0.3867	6506	0.6133	6471	0.7167	630	0.0626	665	0.5443	2399	0.2296	2502	0.6729	887	0.0854	963	0.758	421	0.0377	478	0.7063	880	0.0832	918	-0.5571	8198	0.7608	8111
TNF	0.8846	43	0.0384	441	0.9874	4	0.0018	30	0.5736	2168	0.3466	3683	0.5713	2021	0.3369	3575	0.4318	3643	0.4392	4651	0.7193	577	0.1837	2007	0.7507	457	0.1535	1729	-0.7376	10113	0.8303	8822	0.4352	3644	0.4407	4678
PGM5P2	0.8825	44	0.0401	462	0.8972	133	0.0476	510	-0.5951	8802	0.6795	7156	0.9505	5	0.0073	91	0.6757	1094	0.2414	2607	0.8718	48	0.0442	501	0.7631	392	0.1416	1605	-0.6147	9072	0.697	7402	0.778	383	0.1356	1440
KIF2C	0.8817	45	0.0033	56	0.739	961	0.0956	1010	-0.4852	7625	0.7131	7514	0.732	519	0.0528	549	-0.6438	9270	0.8709	9216	0.4141	3491	0.3371	3631	0.8169	167	0.0147	197	0.5612	2453	0.2378	2583	0.7801	375	0.0351	415
IRX4	0.881	46	0.0033	57	0.7131	1198	0.1177	1271	0.4538	3430	0.3353	3569	0.7531	397	0.0423	450	0.1919	5269	0.5032	5315	0.7643	323	0.0311	383	0.5386	2238	0.2208	2374	-0.392	6715	0.6274	6693	0.6881	984	0.0976	1018
RRN3	0.8804	47	0.0411	471	0.7988	536	0.1342	1447	0.6981	878	0.219	2361	0.5268	2486	0.3729	3966	0.7252	672	0.1878	2096	0.697	694	0.2083	2249	0.82	161	0.086	1018	0.7932	299	0.1216	1336	0.8096	238	0.1033	1076
SUGT1	0.8789	48	0.0034	58	-0.5466	7843	0.729	7765	-0.7219	10020	0.9378	9981	0.7864	260	0.0258	295	0.5818	2020	0.1911	2124	0.7868	221	0.0229	271	0.5751	1921	0.185	2020	0.4487	3748	0.3572	3862	0.6866	995	0.0989	1035
POLM	0.8774	49	0.0101	128	0.4215	4094	0.4128	4401	-0.7592	10254	0.921	9794	0.7754	303	0.0599	639	0.387	4112	0.4263	4526	0.8175	143	0.0318	388	0.804	205	0.0411	503	0.8212	182	0.0387	428	-0.4221	6750	0.5857	6255
ART3	0.876	50	0.0102	129	0.6477	1835	0.225	2398	-0.5377	8209	0.6997	7357	0.8017	219	0.0429	457	0.4615	3267	0.3607	3863	0.684	783	0.1297	1430	0.7287	601	0.0954	1108	0.5082	3084	0.3448	3717	0.671	1132	0.1682	1778
MDM2	0.8751	51	0.0038	60	0.7493	874	0.0886	926	0.3158	4928	0.4728	5013	0.9363	8	0.0001	2	0.449	3428	0.3302	3572	0.7343	482	0.0461	521	0.9083	20	0.0009	21	0.7096	856	0.0811	895	0.2991	4937	0.4701	5013
UNCX	0.8733	52	0.0452	507	0.9498	41	0.0148	184	0.741	541	0.1712	1893	0.7248	577	0.1853	2030	0.7241	685	0.1888	2107	0.6323	1250	0.2731	2916	0.7896	261	0.1131	1281	0.7012	936	0.2247	2453	0.8173	210	0.0951	1004
DCTN1	0.873	53	0.0005	16	-0.8323	10319	0.9812	10449	-0.3548	6194	0.5981	6328	0.7273	551	0.0307	351	0.8285	160	0.0038	62	0.8896	31	0.0003	4	0.8336	126	0.0028	54	0.3168	5137	0.4729	5059	-0.4982	7592	0.7383	7897
TGFB3	0.8728	54	0.0111	136	0.4577	3762	0.3862	4124	-0.4749	7510	0.6478	6829	0.603	1653	0.2321	2482	0.5748	2097	0.265	2864	0.8193	140	0.031	379	0.6051	1638	0.2219	2388	-0.5459	8362	0.7098	7536	0.4855	3093	0.3484	3689
DSG4	0.8716	55	0.0044	67	-0.5847	8207	0.7652	8144	0.6857	998	0.0908	1078	0.3136	4786	0.4611	4872	0.319	4785	0.4599	4866	0.8278	119	0.0098	114	0.5312	2321	0.228	2444	0.4002	4287	0.4131	4411	0.7741	400	0.0385	445
BIRC6	0.8705	56	0.0005	15	0.8185	428	0.0263	299	0.2841	5132	0.4787	5068	0.4556	3261	0.2779	2943	0.637	1477	0.097	1128	0.7446	425	0.0185	221	0.6476	1251	0.0789	943	0.3787	4512	0.41	4375	0.3485	4529	0.414	4378
PCDHB16	0.8692	57	0.0005	13	0.6449	1864	0.1514	1624	0.4268	3758	0.33	3516	0.4213	3658	0.3207	3402	0.7642	405	0.0168	218	0.7111	610	0.0323	392	0.8299	139	0.0031	59	-0.5864	8757	0.8622	9143	0.8231	190	0.007	76
PCDHGA2	0.8688	58	0.0125	154	0.6195	2131	0.2563	2761	0.6534	1334	0.1814	1993	0.4023	3887	0.4115	4366	0.7955	279	0.0478	557	0.7565	358	0.0661	742	-0.8021	10447	0.9572	10164	0.8454	114	0.0264	289	-0.2543	5344	0.4943	5259
MAPK3	0.8661	59	0.0492	556	-0.5462	7841	0.6175	6582	0.8179	185	0.0891	1047	0.6139	1536	0.2999	3182	-0.5253	7990	0.607	6436	-0.3678	5965	0.5093	5418	-0.6957	9815	0.7824	8254	0.605	1928	0.3257	3500	0.3578	4442	0.4754	5072
MLH3	0.866	60	0.0138	165	-0.8717	10474	0.9671	10294	0.8537	104	0.0192	241	-0.3581	6103	0.5369	5693	0.5814	2026	0.2597	2798	0.7491	395	0.072	813	0.2922	4831	0.4749	4995	-0.4788	7669	0.6545	6948	0.6604	1248	0.1794	1933
AGPAT4	0.8648	61	0.0498	558	0.8298	367	0.1045	1110	0.618	1694	0.3065	3247	0.8583	78	0.0559	590	0.9081	26	0.0249	304	0.7831	234	0.1152	1269	0.8113	188	0.0936	1090	-0.6721	9620	0.7574	8003	-0.5541	8159	0.6301	6741
CHRNA6	0.8637	62	0.0008	22	0.8408	318	0.0188	222	0.7128	757	0.0399	482	0.3986	3921	0.3486	3707	0.7691	384	0.0158	213	0.7879	216	0.0082	94	0.5955	1728	0.1235	1386	-0.6947	9805	0.9505	10117	0.56	2319	0.1827	1979
FIG4	0.863	63	0.0047	70	-0.4854	7254	0.6732	7158	0.5071	2841	0.279	2952	0.602	1662	0.1664	1816	0.6652	1201	0.108	1272	0.7073	628	0.0605	685	0.8529	83	0.0069	94	-0.3252	6089	0.569	6059	-0.5643	8282	0.7684	8185
ZNF16	0.8616	64	0.0009	23	0.7614	780	0.055	582	-0.6014	8871	0.8767	9251	0.8057	206	0.007	81	-0.4049	6629	0.6475	6855	0.4176	3457	0.294	3163	0.5256	2391	0.19	2070	0.3771	4533	0.4122	4399	0.7619	462	0.0223	277
NDUFS8	0.8611	65	0.0153	183	0.5259	3125	0.3359	3626	0.8053	226	0.0426	516	-0.5558	8364	0.7123	7556	0.5759	2087	0.2637	2847	0.3796	3923	0.4125	4418	0.8117	184	0.0376	476	0.5779	2256	0.2804	3036	0.7297	656	0.1084	1138
CHRNA4	0.8597	66	0.0053	75	0.7165	1162	0.1151	1240	0.704	824	0.0753	892	0.6288	1347	0.1368	1490	0.5282	2565	0.2462	2663	0.737	468	0.0447	511	0.8808	41	0.0035	63	0.3379	4949	0.4711	5041	-0.5506	8128	0.7536	8034
NFKB2	0.8589	67	0.016	187	0.6713	1609	0.2022	2152	-0.5196	8012	0.6853	7226	0.7389	484	0.0887	934	-0.5269	8005	0.6807	7191	0.7518	385	0.0697	779	0.6427	1287	0.1795	1965	0.5712	2327	0.2893	3114	0.7581	485	0.0836	886
TRAPPC2	0.8589	68	0.0545	607	-0.6458	8825	0.7112	7556	0.3963	4138	0.4632	4906	0.7932	245	0.1113	1178	0.611	1731	0.307	3322	0.7263	531	0.1765	1942	0.7631	391	0.1416	1606	0.72	772	0.2028	2229	0.5992	1872	0.3233	3454
DUSP6	0.8581	69	0.0549	613	0.9599	24	0.0107	130	0.8335	148	0.076	896	0.6444	1214	0.2713	2876	0.7892	303	0.1192	1385	-0.4075	6442	0.5256	5598	0.9151	18	0.0205	270	-0.5787	8681	0.6618	7025	0.8666	67	0.0551	620
ZNF626	0.8573	70	0.0009	25	-0.5393	7772	0.7524	8008	0.6204	1673	0.1152	1335	0.5142	2638	0.2103	2283	0.4347	3610	0.3119	3368	0.5948	1586	0.1128	1246	0.3485	4331	0.3974	4143	0.4479	3754	0.3289	3535	0.7588	481	0.0236	300
PAEP	0.857	71	0.0168	195	0.6924	1400	0.1813	1949	0.4975	2953	0.342	3644	0.8826	41	0.0093	122	-0.7447	10149	0.9104	9639	0.7717	277	0.057	651	0.6877	926	0.1324	1493	0.6535	1393	0.1961	2151	0.8614	79	0.0191	245
YY1	0.8566	72	0.0169	196	0.7618	778	0.1117	1188	-0.4097	6770	0.5913	6252	0.7483	429	0.0792	854	-0.3652	6189	0.5451	5771	-0.5292	7876	0.6686	7066	0.8755	48	0.0108	146	0.8144	205	0.0419	463	0.5504	2429	0.2967	3150
PTPLAD1	0.856	73	0.006	78	0.7936	572	0.0565	605	0.6805	1053	0.0969	1125	0.8072	197	0.0179	214	0.4382	3570	0.3409	3675	0.6584	1004	0.0993	1115	0.5954	1729	0.1655	1842	-0.6628	9533	0.8918	9464	0.6253	1580	0.1587	1682
TOM1L1	0.8557	74	0.0009	24	0.5262	3121	0.2681	2882	0.6522	1341	0.0855	1013	0.6262	1390	0.1024	1053	0.5165	2701	0.2148	2359	0.4234	3377	0.287	3074	0.6945	848	0.0478	568	-0.2954	5861	0.5599	5972	0.4372	3621	0.3156	3373
SHMT2	0.8556	75	0.0565	624	0.7192	1129	0.2174	2290	0.8932	46	0.0333	407	0.6979	763	0.2154	2331	-0.8425	10563	0.9352	9919	-0.6143	8908	0.6842	7216	0.5355	2270	0.3572	3740	0.9316	11	0.0157	179	0.7947	304	0.118	1233
OR52I2	0.8552	76	0.0175	203	0.9452	49	0.0056	81	0.4196	3838	0.4091	4353	0.4627	3176	0.3551	3783	0.4047	3920	0.4124	4364	0.6029	1526	0.2147	2303	-0.4659	7256	0.6162	6488	-0.47	7571	0.6477	6879	0.6612	1236	0.1788	1922
ITGAE	0.8552	77	0.0061	79	0.817	437	0.0429	471	0.6088	1790	0.1674	1853	-0.48	7518	0.6969	7411	-0.5965	8766	0.8224	8659	-0.5993	8733	0.8189	8631	-0.3984	6440	0.605	6372	-0.4092	6920	0.6426	6838	0.4637	3351	0.321	3432
DSCR3	0.8551	78	0.0175	204	0.6306	2014	0.2438	2632	0.7584	441	0.0759	895	0.798	228	0.0448	480	0.827	165	0.0311	363	0.8245	128	0.0288	337	0.942	5	0.0012	32	-0.3473	6284	0.5495	5848	0.8331	144	0.0327	391
HNRPLL	0.8543	79	0.001	26	0.8098	464	0.0292	330	0.5526	2383	0.1819	2000	0.5294	2455	0.1928	2103	0.4434	3503	0.3005	3239	0.7406	448	0.0203	234	0.7143	721	0.0361	452	-0.5104	7985	0.7899	8342	0.5397	2539	0.2037	2187
USP7	0.8536	80	0.0011	29	0.4783	3571	0.3134	3358	0.5281	2637	0.2112	2292	0.7512	411	0.0194	228	0.8775	56	0.0007	19	0.8768	41	0.0005	9	0.8575	75	0.0011	27	-0.6326	9235	0.9055	9609	0.6664	1177	0.083	880
ACOX3	0.8531	81	0.0064	84	0.7778	667	0.0686	723	0.3463	4666	0.4486	4757	0.3272	4666	0.4509	4746	-0.7165	9947	0.9335	9896	0.5476	2056	0.1987	2158	0.5747	1928	0.1853	2024	-0.623	9156	0.8558	9069	-0.6896	9590	0.8941	9506
ALMS1	0.8527	82	0.0582	639	0.6277	2045	0.3078	3303	0.8114	205	0.0959	1116	0.8057	207	0.0994	1027	-0.7734	10314	0.8709	9217	0.7016	662	0.2033	2204	0.9201	13	0.018	230	0.9265	13	0.0174	196	-0.4956	7567	0.59	6302
MYL7	0.8514	83	0.0191	219	0.6391	1930	0.2348	2527	-0.3177	5855	0.5247	5534	0.752	406	0.0759	825	0.7959	276	0.0476	555	0.7799	243	0.0517	579	-0.3704	6105	0.5381	5658	-0.7131	9950	0.8797	9333	0.5442	2494	0.3022	3211
THBS3	0.8508	84	0.0011	30	0.6923	1403	0.1088	1166	-0.5373	8203	0.8126	8574	0.6695	994	0.0674	711	0.7779	340	0.0133	183	0.6485	1093	0.0709	802	0.7953	241	0.0078	112	-0.5974	8892	0.8736	9269	0.5001	2953	0.2468	2625
PCDH15	0.8508	85	0.0011	28	-0.2358	5369	0.5093	5379	0.7255	660	0.0342	415	0.327	4667	0.4303	4566	-0.3877	6433	0.625	6620	0.2995	4697	0.4262	4550	0.5818	1851	0.1353	1525	0.4343	3915	0.3464	3733	-0.3277	5776	0.5513	5879
TOMM40	0.8504	86	0.0192	223	0.8324	351	0.0568	610	0.8128	197	0.0378	455	0.7384	489	0.0891	939	0.6596	1249	0.17	1899	-0.5586	8254	0.7026	7416	0.8302	138	0.0286	358	0.841	123	0.028	313	0.333	4665	0.4627	4935
SPINK5	0.8501	87	0.0192	221	-0.2757	5480	0.5041	5326	-0.8431	10560	0.9761	10376	0.7055	705	0.118	1248	0.5643	2202	0.2744	2943	0.5082	2416	0.2958	3188	0.7202	666	0.1041	1192	0.713	828	0.1269	1389	0.6066	1783	0.2424	2580
SDHAP3	0.8484	88	0.0195	228	0.4471	3862	0.3946	4215	0.434	3669	0.3959	4228	0.4751	3037	0.3443	3659	-0.4976	7675	0.6532	6913	0.5288	2225	0.2818	3017	0.6826	976	0.1362	1538	0.7162	803	0.1239	1357	0.4782	3177	0.3538	3748
CDC37	0.8472	89	0.0076	94	0.696	1365	0.132	1432	0.7038	826	0.0755	893	0.4878	2889	0.2834	2995	0.6995	893	0.0773	917	0.7338	486	0.0464	523	0.8046	201	0.019	244	0.5398	2719	0.2629	2865	-0.251	5333	0.5033	5362
ATRX	0.8472	90	0.0076	93	-0.3954	6374	0.5989	6369	0.6507	1359	0.1236	1419	0.6797	924	0.0906	955	0.6734	1122	0.1003	1161	-0.2755	5203	0.4933	5236	0.4955	2700	0.2624	2766	-0.3426	6234	0.583	6213	-0.2932	5534	0.5184	5528
SRP19	0.8464	91	0.0015	32	0.2492	5281	0.4968	5269	0.62	1676	0.1152	1334	0.6958	776	0.0485	502	0.6396	1452	0.0943	1093	0.3664	4065	0.3576	3842	0.8507	89	0.0014	34	-0.2475	5638	0.5334	5678	0.5119	2830	0.2348	2509
ADTRP	0.8463	92	0.0015	34	-0.4298	6713	0.648	6896	-0.3721	6362	0.6185	6527	0.4424	3405	0.2949	3129	0.7459	502	0.0232	287	0.8613	62	0.0009	10	0.3342	4466	0.4139	4314	-0.2949	5852	0.5597	5968	0.6788	1072	0.0721	787
FOXP1	0.8454	93	0.0078	97	0.6518	1794	0.1744	1889	0.796	254	0.0226	281	0.814	176	0.0156	179	0.6243	1611	0.1467	1663	0.3643	4086	0.3913	4180	0.4972	2682	0.2607	2754	-0.6605	9515	0.8892	9442	0.5635	2283	0.2231	2389
CYP4Z1	0.8453	94	0.0215	250	-0.6238	8592	0.7528	8015	-0.6076	8932	0.7731	8129	0.7044	715	0.1191	1259	0.2277	5245	0.4943	5227	0.5844	1687	0.2331	2489	0.4261	3434	0.3808	3996	-0.5568	8473	0.7204	7633	0.7097	807	0.1264	1342
SET	0.8451	95	0.0216	251	-0.2792	5494	0.5051	5332	0.8314	152	0.0293	351	0.5999	1692	0.2357	2526	0.6662	1196	0.1632	1838	0.7929	202	0.0443	502	0.5242	2398	0.2942	3095	-0.469	7562	0.6468	6867	0.8203	198	0.0389	450
CSE1L	0.8445	96	0.0016	37	0.3871	4427	0.4025	4299	0.7753	346	0.0142	177	-0.3402	5926	0.5719	6055	0.5135	2733	0.2187	2401	0.2634	4889	0.4504	4791	0.8148	176	0.0048	76	0.7459	577	0.0301	331	0.3521	4495	0.4089	4327
SGK223	0.8443	97	0.0078	96	-0.6904	9263	0.865	9166	0.8021	233	0.0206	256	0.5561	2166	0.2117	2294	-0.5692	8449	0.793	8343	0.571	1821	0.177	1951	0.3994	3777	0.3691	3876	0.5946	2062	0.2004	2197	0.6525	1323	0.1313	1389
LHB	0.8432	98	0.0659	746	-0.8036	10140	0.8779	9311	0.7631	412	0.146	1639	0.8565	80	0.0574	605	-0.5656	8409	0.6427	6810	0.7045	641	0.1992	2162	0.8485	93	0.0616	748	0.8051	243	0.1103	1208	0.6253	1578	0.3001	3185
ATP5C1	0.8413	99	0.0226	263	-0.5604	7966	0.6895	7329	0.8648	83	0.0145	182	0.6444	1215	0.183	2010	-0.3051	5636	0.5103	5398	-0.5329	7920	0.673	7106	0.8324	133	0.0279	343	0.678	1151	0.165	1813	0.7407	582	0.0982	1028
HECW1	0.8407	100	0.0676	765	-0.5664	8028	0.6364	6786	0.5973	1897	0.3257	3475	0.6251	1405	0.2894	3064	0.6461	1395	0.2724	2922	-0.5051	7565	0.5802	6140	0.8063	198	0.0979	1127	0.3925	4372	0.4691	5009	0.7389	595	0.179	1926
ALPL	0.8406	101	0.0084	104	0.6981	1348	0.13	1409	0.8238	169	0.0135	173	0.5335	2400	0.2354	2523	0.4284	3697	0.3508	3780	0.4882	2610	0.2552	2721	0.525	2395	0.2345	2514	0.5996	1998	0.1943	2129	0.3247	4742	0.453	4805
BMP2K	0.8399	102	0.0008	21	0.6591	1717	0.1147	1232	-0.4104	6778	0.7052	7427	0.6553	1121	0.0532	554	-0.3189	5755	0.5753	6065	0.6544	1043	0.045	514	0.483	2818	0.1976	2139	-0.5217	8102	0.8434	8951	-0.3869	6357	0.6346	6787
STK17A	0.8393	103	0.0086	105	-0.4896	7290	0.6777	7194	-0.2673	5508	0.524	5528	0.6273	1366	0.1388	1507	-0.4538	7207	0.6696	7070	0.8225	132	0.011	130	0.8292	141	0.0109	148	0.7205	767	0.0733	807	0.3561	4459	0.43	4557
LMBR1L	0.8384	104	0.0088	109	0.6387	1934	0.1861	2002	0.6944	918	0.0817	978	0.7166	631	0.0629	667	0.8105	222	0.0177	235	0.6755	856	0.0833	933	0.7645	385	0.035	432	-0.6458	9359	0.8767	9304	0.7412	576	0.0592	666
APOD	0.8382	105	0.0019	39	-0.3512	5991	0.5729	6093	0.6163	1713	0.119	1370	0.734	509	0.027	314	-0.3862	6416	0.623	6598	0.5	2486	0.2003	2168	0.7472	482	0.0202	266	0.6599	1328	0.0916	1006	-0.3206	5717	0.5448	5798
FKBP14	0.8375	106	0.0019	40	0.8896	158	0.0065	91	0.4135	3900	0.349	3704	0.2983	4913	0.4547	4812	-0.443	7075	0.6948	7348	0.7792	245	0.01	115	0.2807	4915	0.4578	4812	0.5076	3093	0.256	2782	0.4621	3369	0.2907	3077
CIRH1A	0.8374	107	0.0019	41	0.35	4744	0.4353	4643	0.6725	1141	0.068	798	0.3314	4626	0.4264	4525	0.652	1332	0.0823	984	0.6193	1394	0.094	1057	0.8785	44	0.0005	14	0.4241	4035	0.3588	3875	-0.3794	6277	0.6014	6415
CNDP1	0.8366	108	0.002	42	-0.2323	5363	0.5089	5373	0.4849	3080	0.2615	2776	0.6167	1500	0.1104	1162	0.7026	858	0.0468	539	0.7413	444	0.02	231	-0.4746	7365	0.7271	7695	-0.4536	7380	0.7287	7728	0.3496	4522	0.4129	4365
ZNF680	0.8366	109	0.0092	113	0.8561	252	0.0244	273	0.5977	1893	0.1792	1968	0.8667	56	0.0048	54	0.5034	2831	0.2732	2930	0.6322	1253	0.1219	1330	0.6605	1153	0.1042	1193	-0.3686	6493	0.6068	6481	0.6336	1500	0.1501	1602
ZNF513	0.8365	110	0.0707	798	-0.3085	5653	0.5051	5333	0.9732	4	0.002	37	-0.5111	7870	0.5935	6285	-0.7563	10229	0.852	8980	0.9159	15	0.0191	226	0.6025	1660	0.3045	3184	-0.4621	7461	0.5785	6163	0.541	2524	0.3729	3962
HTR1B	0.8363	111	0.0244	282	-0.7756	9976	0.8981	9521	0.5993	1881	0.2464	2623	0.6124	1551	0.2212	2382	0.6248	1603	0.2125	2342	0.3726	3997	0.4176	4462	0.5181	2454	0.2993	3135	-0.6942	9802	0.8605	9125	-0.485	7457	0.6375	6820
AKAP3	0.8362	112	0.0093	115	-0.6973	9335	0.872	9251	-0.6473	9383	0.8781	9278	0.4786	2999	0.2909	3090	0.6584	1259	0.1145	1338	0.4785	2712	0.2651	2829	0.6222	1470	0.1388	1576	-0.5234	8117	0.756	7990	0.4088	3927	0.3779	4007
SLC6A14	0.8361	113	0.0248	291	-0.6254	8603	0.7541	8026	0.4846	3089	0.3532	3748	0.7317	521	0.0953	991	0.6925	959	0.1356	1565	0.9243	13	0.0025	32	0.7191	679	0.1048	1197	0.8698	78	0.0148	163	0.6514	1334	0.1923	2081
PCDH20	0.8354	114	0.0093	116	-0.6128	8486	0.7926	8431	0.6514	1352	0.1231	1413	0.7044	716	0.072	786	0.5704	2145	0.2027	2248	0.7596	345	0.0331	401	0.3022	4757	0.4607	4840	0.2682	5442	0.5163	5506	0.4304	3697	0.3547	3762
PAPL	0.8353	115	0.0023	45	-0.6867	9231	0.8955	9491	0.5348	2567	0.2024	2208	0.7915	248	0.0092	120	0.6345	1500	0.0998	1151	0.7054	638	0.0348	419	0.577	1906	0.1391	1581	-0.296	5864	0.5603	5977	0.4991	2964	0.2481	2642
MCTP2	0.8349	116	0.0023	44	0.7252	1069	0.0829	858	0.5248	2663	0.2144	2322	0.7617	362	0.0169	197	-0.552	8260	0.8187	8616	0.3922	3767	0.3274	3509	0.4622	3034	0.2605	2750	0.3644	4700	0.4273	4567	-0.2766	5436	0.5131	5467
PISD	0.8336	117	0.0098	126	-0.444	6842	0.6388	6811	-0.5542	8374	0.7844	8265	0.7341	508	0.0522	544	0.425	3732	0.3537	3814	0.591	1621	0.1574	1747	0.6761	1030	0.0911	1065	0.3107	5188	0.4911	5272	-0.381	6295	0.5867	6271
FOSB	0.8333	118	0.0098	122	0.4342	3972	0.3778	4040	0.5248	2662	0.2598	2761	0.7936	242	0.0232	266	-0.427	6881	0.6425	6805	0.2481	4953	0.4732	5038	0.6868	936	0.0823	979	0.6744	1180	0.1136	1259	0.4019	4001	0.3856	4098
CRYBA1	0.8328	119	0.0271	320	0.9592	25	0.003	49	-0.6048	8908	0.7693	8088	0.4746	3045	0.3446	3664	0.6384	1463	0.1949	2167	0.6314	1261	0.184	2012	0.6515	1217	0.1707	1890	-0.628	9193	0.7936	8388	0.8187	204	0.0399	457
ZNF133	0.8312	120	0.028	334	0.8217	412	0.0625	662	0.4395	3601	0.3915	4180	-0.4117	6718	0.5809	6153	-0.6996	9821	0.8645	9147	0.4273	3328	0.3685	3961	0.7019	803	0.12	1357	-0.7315	10067	0.8994	9542	0.6827	1030	0.1536	1634
ESM1	0.8304	121	0.0027	50	-0.4069	6496	0.623	6656	0.7614	420	0.0177	224	0.6499	1160	0.0807	868	0.5391	2457	0.1886	2106	0.6097	1476	0.1016	1150	0.7247	630	0.0307	384	-0.3369	6184	0.5933	6325	-0.3854	6340	0.6075	6462
SPINK2	0.8288	122	0.0111	137	-0.4893	7285	0.6773	7187	0.632	1559	0.1422	1608	0.5469	2265	0.2216	2388	0.6813	1044	0.0927	1082	0.8734	46	0.0035	42	0.6461	1266	0.1177	1328	0.4215	4053	0.3886	4150	0.657	1281	0.1264	1341
CES1	0.8286	123	0.0777	867	0.4375	3945	0.4425	4716	-0.7084	9934	0.7965	8388	-0.573	8580	0.6496	6916	0.984	1	0.0004	10	0.8583	64	0.0529	602	0.7891	263	0.1134	1288	0.5598	2480	0.3648	3929	0.7394	587	0.1785	1916
PRB4	0.8284	124	0.0289	345	0.7626	772	0.1109	1182	-0.6568	9495	0.8238	8690	0.7858	262	0.0531	553	0.8193	191	0.0349	401	0.8581	67	0.0148	174	0.6184	1511	0.2097	2261	0.4659	3547	0.3807	4087	0.6652	1189	0.1738	1849
RPH3AL	0.8284	125	0.0778	868	0.7085	1244	0.2282	2438	0.6465	1407	0.2769	2934	-0.525	8020	0.6055	6429	-0.5457	8197	0.625	6621	0.7463	410	0.1538	1703	0.762	397	0.1426	1619	0.9605	6	0.0051	49	0.8239	187	0.089	951
PRDM10	0.8282	126	0.0291	347	0.7715	712	0.1032	1095	0.7633	409	0.0722	848	-0.4661	7358	0.6254	6639	0.706	823	0.1214	1410	0.5235	2281	0.285	3056	0.6793	1000	0.1403	1591	0.4827	3376	0.3659	3942	0.4046	3974	0.4138	4376
MRPL37	0.8282	127	0.0028	52	0.7024	1305	0.1013	1077	0.6806	1051	0.0613	727	0.3434	4527	0.4139	4394	0.7115	779	0.0403	469	0.3572	4160	0.3682	3956	0.6728	1053	0.0612	742	0.7214	761	0.0426	479	0.4192	3827	0.3353	3584
TNNT3	0.8281	128	0.0291	348	0.4055	4255	0.4242	4540	0.6698	1171	0.1616	1798	0.4168	3718	0.3991	4240	0.4574	3317	0.3635	3893	0.7642	324	0.0614	698	0.7867	272	0.0511	614	-0.3456	6265	0.5486	5832	-0.5148	7738	0.663	7108
TARDBP	0.8267	129	0.0297	352	0.9271	76	0.0102	124	-0.4568	7309	0.6325	6662	0.4668	3125	0.3514	3729	0.7638	409	0.0691	827	0.7307	500	0.088	990	0.7506	460	0.0752	896	-0.6252	9171	0.7913	8351	0.8331	143	0.0327	390
WDR83	0.8267	130	0.0114	141	0.7188	1136	0.1133	1207	0.6838	1020	0.0931	1103	0.8387	108	0.0094	123	0.8755	60	0.0043	70	0.7194	576	0.0539	621	0.7211	656	0.0583	706	-0.4929	7812	0.726	7693	0.3519	4497	0.4333	4602
ADH6	0.8265	131	0.0115	143	0.7707	717	0.0733	770	-0.2633	5493	0.523	5506	0.7104	669	0.068	716	0.6585	1258	0.1142	1335	0.5444	2090	0.2017	2182	0.5702	1965	0.19	2071	0.4508	3729	0.3552	3845	0.5753	2128	0.2093	2241
PLA2G2A	0.826	132	0.0115	144	-0.3419	5906	0.5547	5863	-0.3471	6119	0.5765	6098	-0.2963	5580	0.5255	5573	0.7139	764	0.0677	808	0.3202	4512	0.4331	4614	0.4676	2986	0.2927	3071	0.6837	1097	0.1063	1160	0.3068	4885	0.4648	4954
UBASH3A	0.8257	133	0.0116	145	0.57	2643	0.2529	2723	-0.3266	5935	0.5579	5901	-0.3594	6121	0.5766	6103	-0.2969	5579	0.5263	5576	-0.4373	6798	0.6331	6709	0.585	1816	0.1754	1926	0.4398	3853	0.3673	3956	0.4751	3218	0.3106	3297
STK33	0.8255	134	0.03	358	-0.6665	9043	0.7967	8466	0.4857	3070	0.3524	3741	0.3773	4163	0.4315	4576	-0.6425	9261	0.8066	8483	0.6832	793	0.1303	1440	0.7432	502	0.0812	964	0.3363	4961	0.4782	5110	0.6537	1314	0.19	2060
CBS	0.8253	135	0.03	356	0.5637	2729	0.3078	3302	0.8834	59	0.0097	127	0.7879	257	0.0511	533	0.5665	2186	0.2727	2923	0.742	438	0.0775	879	0.6347	1370	0.1904	2075	-0.4261	7089	0.6084	6500	-0.7344	9963	0.8843	9376
CD84	0.8246	136	0.0121	149	-0.8162	10226	0.9608	10235	0.5793	2086	0.1992	2172	0.6621	1062	0.1067	1111	0.7381	554	0.0513	611	0.6992	679	0.0659	741	0.831	136	0.0103	140	-0.3171	6017	0.5622	5994	0.8312	156	0.0151	191
ST6GALNAC1	0.8239	137	0.0125	151	0.6538	1767	0.172	1866	0.5994	1879	0.1774	1953	0.5262	2497	0.2414	2588	0.3623	4383	0.4237	4501	0.6724	892	0.0859	966	0.6183	1513	0.1437	1637	-0.4228	7058	0.656	6964	0.7323	640	0.064	713
SAFB2	0.8238	138	0.0125	153	0.5803	2532	0.2448	2641	0.6759	1098	0.1008	1168	0.6525	1141	0.1156	1227	0.63	1543	0.1406	1599	0.6913	738	0.0721	816	0.6944	851	0.0759	908	-0.5429	8328	0.7752	8189	0.6696	1140	0.1137	1198
LCN6	0.8234	139	0.0125	152	-0.7461	9756	0.9126	9704	-0.4611	7357	0.6888	7256	-0.3458	5982	0.5624	5955	0.861	79	0.0062	91	0.298	4706	0.4495	4783	0.5551	2081	0.2053	2213	0.6439	1503	0.1464	1598	0.6105	1731	0.1744	1855
GABPA	0.8232	140	0.0128	155	0.8002	526	0.0524	562	0.7638	405	0.0386	465	0.7462	447	0.0456	484	0.6991	896	0.0774	919	0.37	4021	0.3856	4121	0.9265	9	0.0003	8	-0.2796	5766	0.5415	5769	0.633	1513	0.1509	1610
CYP2R1	0.8231	141	0.0129	157	0.8199	422	0.0414	461	0.3008	5039	0.4842	5127	0.4282	3580	0.3448	3668	0.2563	5187	0.496	5250	0.3695	4024	0.3859	4125	0.6324	1390	0.1298	1455	-0.4125	6949	0.6464	6861	0.6156	1676	0.1691	1792
INHBC	0.8229	142	0.0131	158	-0.5688	8051	0.7495	7978	0.5657	2247	0.2152	2326	0.654	1130	0.1139	1211	-0.2986	5590	0.5275	5595	0.5512	2018	0.1962	2129	0.4744	2906	0.2859	2993	0.409	4192	0.4035	4293	0.6875	991	0.0981	1027
CD180	0.8227	143	0.0033	54	0.5673	2676	0.2254	2404	0.3318	4805	0.4413	4687	0.4412	3422	0.2961	3141	-0.5456	8194	0.8129	8549	0.6702	913	0.0557	641	0.4838	2808	0.2359	2525	-0.5338	8226	0.8111	8577	0.3666	4373	0.3946	4203
LPAR3	0.8216	144	0.0135	162	0.6978	1351	0.1304	1410	-0.4021	6684	0.629	6638	0.7521	405	0.0428	454	0.9074	27	0.001	24	0.865	57	0.0043	48	-0.2744	5327	0.506	5329	-0.5027	7906	0.7352	7782	0.493	3035	0.2951	3125
OLFM1	0.821	145	0.0138	164	0.5999	2333	0.2255	2408	-0.7215	10015	0.9372	9974	0.7247	578	0.0581	619	0.6549	1300	0.1179	1369	0.4052	3604	0.3455	3722	0.8977	25	0.0017	39	0.4331	3928	0.3748	4034	0.325	4739	0.4527	4802
PCDHB15	0.8206	146	0.0139	167	0.7273	1054	0.1053	1121	-0.2562	5462	0.5207	5483	0.7224	589	0.0594	630	0.3535	4476	0.4321	4579	0.4705	2799	0.2745	2934	0.5846	1820	0.1759	1932	-0.7074	9899	0.9279	9847	0.5095	2862	0.2777	2938
CRLF1	0.8197	147	0.0142	171	0.3695	4585	0.4347	4636	0.8158	190	0.0158	196	0.4081	3822	0.3673	3913	0.738	555	0.0514	613	0.8469	85	0.0069	80	0.4014	3753	0.3653	3833	-0.4674	7536	0.7002	7430	-0.5691	8332	0.7725	8233
SMPD1	0.8188	148	0.0149	177	0.6805	1522	0.1489	1600	0.479	3142	0.3067	3252	0.9439	6	0.0001	3	0.4567	3328	0.3222	3496	0.8615	60	0.0052	60	0.8335	127	0.0095	135	-0.4136	6964	0.6474	6871	0.5476	2459	0.2407	2567
SPIB	0.8187	149	0.0042	64	0.8638	226	0.0122	146	-0.692	9807	0.9491	10099	0.6621	1060	0.0715	774	0.6506	1348	0.0839	996	0.3263	4445	0.4044	4303	0.5123	2511	0.2028	2185	0.4318	3950	0.3492	3774	0.4368	3629	0.3159	3380
MYL9	0.8185	150	0.0042	62	0.6337	1985	0.1607	1739	0.5634	2273	0.1699	1877	0.561	2114	0.161	1765	0.5001	2860	0.2344	2542	0.7637	325	0.0134	155	0.5676	1985	0.1469	1673	-0.6142	9062	0.8901	9449	0.6472	1374	0.1007	1049
GZF1	0.8185	151	0.0042	63	-0.6809	9177	0.8899	9431	0.3416	4706	0.431	4565	0.6294	1343	0.1002	1034	0.2976	4935	0.4589	4856	0.385	3851	0.3342	3596	0.3342	4465	0.4139	4313	0.6223	1744	0.1294	1407	0.549	2443	0.1933	2093
STX11	0.8174	152	0.0151	179	-0.3551	6020	0.5656	6013	0.7059	813	0.074	866	0.5502	2221	0.2187	2364	0.3802	4173	0.4049	4279	-0.3811	6119	0.5739	6079	0.6662	1107	0.0998	1144	0.513	3029	0.2909	3135	0.6842	1017	0.1016	1060
UHMK1	0.8166	153	0.0043	65	0.6865	1458	0.1139	1222	0.6492	1375	0.0876	1034	-0.2693	5409	0.5133	5435	-0.3311	5857	0.5634	5959	0.6724	891	0.0542	625	0.4865	2784	0.2325	2493	0.3759	4554	0.4136	4418	0.8188	203	0.0076	86
ATP8B2	0.8148	154	0.0045	69	-0.6503	8876	0.8655	9169	0.5485	2434	0.1868	2052	0.3123	4794	0.4436	4686	0.7267	652	0.0332	379	0.6162	1417	0.0966	1086	0.413	3593	0.3195	3346	0.5942	2067	0.1566	1703	0.6547	1299	0.0925	980
SECISBP2L	0.8147	155	0.0045	68	0.7667	749	0.0511	546	0.6913	944	0.0542	642	0.7473	438	0.0208	246	0.3592	4412	0.4008	4249	0.7665	306	0.0126	148	0.8153	173	0.0046	70	-0.613	9054	0.8891	9440	0.6616	1229	0.0868	921
RRAGB	0.8146	156	0.0153	181	0.2889	5145	0.4896	5199	0.2274	5330	0.5126	5399	0.8995	27	0.0015	21	0.7476	499	0.0463	534	0.6629	964	0.0952	1069	0.7635	388	0.0353	436	-0.2787	5758	0.5412	5764	-0.4766	7363	0.6777	7258
TMPRSS11E	0.8139	157	0.0153	182	0.5895	2442	0.2366	2546	0.5082	2827	0.2783	2947	0.7448	451	0.0463	490	0.6043	1800	0.1687	1881	0.5408	2129	0.2048	2223	0.5635	2023	0.1965	2131	0.5435	2675	0.258	2813	-0.6994	9681	0.9047	9618
GDF5	0.8136	158	0.0155	184	-0.477	7185	0.666	7091	-0.4921	7700	0.7207	7588	0.7774	294	0.0287	331	-0.3175	5747	0.5389	5717	-0.571	8410	0.7869	8289	0.3654	4159	0.4062	4228	0.708	867	0.0825	909	0.7906	326	0.0303	354
LPHN1	0.8132	159	0.0364	419	0.7171	1155	0.1563	1689	0.4421	3574	0.3889	4155	0.6263	1388	0.2046	2224	0.6944	937	0.1341	1551	0.87	51	0.0111	136	-0.3555	5950	0.5301	5581	-0.5641	8544	0.7276	7715	0.6951	930	0.1421	1511
POLR3G	0.8132	160	0.0049	71	0.7167	1158	0.0899	939	0.6355	1516	0.1011	1172	0.7107	668	0.0393	425	0.3375	4646	0.4242	4509	0.4539	2996	0.2511	2682	0.4405	3264	0.2849	2986	0.23	5542	0.5192	5537	0.4248	3761	0.3289	3523
CH25H	0.8127	161	0.0051	72	0.3021	5078	0.4706	5005	-0.4444	7171	0.7087	7466	0.7748	305	0.0133	153	0.8605	80	0.0012	29	0.4216	3402	0.2893	3107	0.6072	1618	0.1127	1274	0.2441	5510	0.5161	5504	0.741	581	0.0319	375
CXCR6	0.8124	162	0.0051	73	0.555	2818	0.2384	2567	0.3445	4682	0.4282	4541	0.6533	1134	0.0779	840	0.7189	721	0.0368	422	0.8054	168	0.0049	59	0.7919	253	0.0086	124	0.5351	2788	0.2236	2435	0.7545	502	0.0254	312
VDAC1	0.8119	163	0.0052	74	-0.4207	6638	0.6375	6795	0.6174	1700	0.1177	1360	0.6133	1544	0.1123	1193	0.3367	4651	0.4248	4512	0.4839	2657	0.2185	2343	0.6925	877	0.0487	586	0.7694	435	0.0194	210	0.4925	3043	0.2554	2705
IL15RA	0.8114	164	0.0919	1040	-0.3717	6139	0.5231	5519	0.5302	2618	0.3835	4094	0.66	1083	0.2554	2722	0.7273	644	0.1863	2084	0.3863	3835	0.4509	4797	0.664	1125	0.247	2628	0.3605	4747	0.4824	5150	0.4353	3643	0.4407	4679
EGFL6	0.8112	165	0.0373	426	-0.5354	7734	0.6675	7113	0.2742	5186	0.4955	5230	0.507	2709	0.3197	3390	-0.6676	9516	0.8331	8774	0.7635	326	0.0618	703	0.4311	3375	0.3763	3944	-0.5674	8577	0.7315	7753	0.7705	423	0.0738	802
UGT1A3	0.8098	166	0.0374	429	0.9518	36	0.0045	65	0.4293	3729	0.4008	4274	-0.4497	7180	0.6125	6504	0.8288	159	0.0303	356	0.5574	1955	0.2605	2771	0.5993	1687	0.228	2445	-0.6546	9453	0.8214	8708	0.7009	870	0.1354	1437
DCHS1	0.8097	167	0.0162	188	0.3842	4450	0.4237	4531	0.5896	1983	0.189	2073	0.7874	259	0.0257	293	0.6646	1208	0.1084	1278	0.5808	1729	0.1686	1863	0.7735	337	0.0299	375	-0.5658	8560	0.8002	8453	-0.3196	5708	0.5322	5677
THBD	0.8095	168	0.0374	427	-0.5845	8203	0.7109	7549	0.7095	786	0.1193	1378	0.5434	2301	0.2878	3047	0.4985	2878	0.3307	3577	0.4449	3098	0.3522	3784	0.6899	902	0.131	1477	-0.5541	8454	0.7178	7609	0.6807	1052	0.1571	1661
MS4A10	0.8095	169	0.0374	428	0.7469	898	0.1261	1364	-0.4342	7051	0.6107	6447	0.5664	2058	0.2681	2848	0.7258	663	0.1035	1206	0.2772	4824	0.4688	5000	0.4767	2885	0.3348	3486	-0.3449	6258	0.5479	5824	0.3658	4379	0.443	4709
EHF	0.8092	170	0.0164	190	-0.8917	10533	0.989	10539	-0.6682	9609	0.8977	9506	0.6379	1270	0.13	1402	0.4423	3518	0.3372	3642	0.7242	539	0.051	569	0.7709	353	0.0311	390	-0.5002	7882	0.7328	7765	0.4407	3578	0.3456	3661
CD34	0.8088	171	0.0059	77	0.2743	5209	0.4856	5162	-0.4988	7778	0.7724	8119	0.6404	1247	0.0896	945	-0.669	9534	0.9339	9903	0.3259	4451	0.4047	4307	0.8031	212	0.0066	92	-0.7516	10202	0.9772	10415	0.7149	778	0.0455	523
INCENP	0.8087	172	0.0379	434	0.9555	30	0.004	58	0.7841	302	0.0551	654	-0.6642	9550	0.833	8817	0.5157	2708	0.3177	3454	0.5592	1930	0.2581	2752	0.8535	82	0.0184	237	-0.3317	6136	0.5382	5735	-0.5804	8458	0.7216	7703
VANGL1	0.8081	173	0.017	198	0.4067	4245	0.4041	4311	-0.2873	5634	0.5323	5620	0.7173	626	0.0623	660	0.6087	1755	0.164	1842	0.6985	684	0.067	749	0.6259	1438	0.1353	1524	0.3785	4517	0.4361	4656	-0.3419	5901	0.5495	5854
NAIP	0.808	174	0.0384	442	-0.7342	9646	0.8655	9170	0.7524	478	0.08	951	0.5538	2188	0.2791	2957	0.6038	1805	0.2361	2570	0.7541	371	0.0681	762	0.6953	841	0.1258	1416	0.3286	5036	0.4826	5152	0.7451	558	0.0943	990
CGREF1	0.8075	175	0.0387	444	0.4413	3916	0.3981	4247	0.4014	4063	0.4243	4498	-0.4894	7620	0.6453	6869	0.7959	277	0.0476	556	0.7261	532	0.0918	1030	0.7986	226	0.0439	533	-0.8263	10525	0.9677	10287	0.6893	975	0.1479	1580
CDA	0.8065	176	0.0174	200	-0.3943	6359	0.5981	6358	0.4875	3053	0.2995	3156	0.5629	2095	0.2055	2231	0.57	2149	0.2034	2258	0.4137	3497	0.3375	3637	0.7053	774	0.0689	831	0.45	3737	0.3557	3850	0.2884	5011	0.4768	5084
SIX4	0.8064	177	0.0063	83	0.5339	3036	0.2609	2802	-0.4079	6750	0.6637	6987	0.5486	2239	0.1723	1879	0.3675	4327	0.3908	4160	0.5825	1709	0.1236	1350	0.527	2365	0.1887	2053	-0.5706	8607	0.848	8987	0.8245	180	0.0069	74
LDHAL6A	0.8063	178	0.0399	456	-0.4179	6605	0.5804	6179	0.7387	560	0.0928	1096	0.4293	3571	0.3868	4118	-0.4041	6618	0.5762	6084	0.5351	2171	0.2776	2970	-0.5035	7693	0.6482	6864	0.568	2368	0.292	3153	0.9653	6	0.0005	8
PQBP1	0.8061	179	0.0175	202	0.8256	390	0.0382	430	0.6965	901	0.0802	955	-0.4206	6839	0.6369	6781	0.6663	1195	0.1073	1262	0.7722	273	0.0281	328	0.4131	3592	0.353	3692	0.5012	3169	0.3038	3250	-0.3552	6030	0.5612	5989
NLGN1	0.8058	180	0.0063	81	0.7431	929	0.0681	719	0.3743	4382	0.394	4209	0.3679	4268	0.3849	4098	0.339	4630	0.4224	4490	-0.2895	5284	0.4989	5299	0.5989	1696	0.1201	1358	0.5778	2258	0.172	1883	0.5875	1985	0.1561	1651
HIST1H2AG	0.8052	181	0.0978	1097	0.8914	150	0.0528	568	0.5311	2604	0.3831	4091	0.9552	3	0.0058	68	0.7334	590	0.1794	2017	0.7591	347	0.1408	1571	0.8001	220	0.104	1190	-0.3665	6468	0.5283	5631	-0.5821	8479	0.656	7021
ZFP64	0.8049	182	0.0981	1102	0.7246	1076	0.2114	2225	0.6864	989	0.2317	2473	-0.6277	9174	0.7042	7473	0.496	2897	0.3944	4192	0.714	599	0.1895	2058	0.7533	444	0.1516	1717	-0.5926	8831	0.6746	7161	-0.7249	9898	0.8032	8541
SIAH3	0.8045	183	0.0179	207	0.6719	1604	0.1566	1693	0.8115	204	0.0173	214	0.4375	3463	0.3369	3576	-0.6815	9659	0.9071	9607	-0.5065	7578	0.708	7455	0.4287	3398	0.3357	3502	0.7978	278	0.0267	293	0.4684	3300	0.316	3382
SLC31A1	0.8044	184	0.0179	209	0.5157	3227	0.3042	3267	-0.2928	5668	0.5351	5648	-0.3056	5651	0.5298	5618	0.469	3194	0.306	3311	0.4434	3116	0.3024	3273	0.7504	463	0.0416	511	-0.3854	6663	0.6205	6627	0.3297	4703	0.4489	4759
ARID1A	0.8044	185	0.0179	208	0.5852	2485	0.2406	2600	0.28	5153	0.4979	5259	0.6069	1605	0.1606	1761	0.7497	492	0.0453	526	0.8798	38	0.0029	35	0.661	1151	0.104	1191	-0.4548	7396	0.6866	7292	0.5785	2089	0.2068	2212
GALNT9	0.8042	186	0.0413	475	0.6703	1621	0.2031	2159	0.7646	399	0.071	832	0.7101	671	0.1136	1206	0.6004	1837	0.2402	2597	0.526	2251	0.2833	3035	0.4293	3392	0.3777	3964	0.7315	690	0.1096	1199	-0.7348	9966	0.8848	9386
YWHAE	0.8041	187	0.0989	1112	-0.7633	9895	0.8363	8843	0.9183	27	0.0192	239	-0.6607	9518	0.7441	7879	0.3899	4080	0.4604	4871	0.8254	124	0.0776	881	0.7364	542	0.1715	1894	-0.6681	9589	0.7531	7954	-0.9186	10643	0.9762	10392
EPHX1	0.8039	188	0.0063	82	0.3963	4336	0.3936	4208	0.6964	903	0.0499	603	-0.3417	5941	0.574	6069	-0.3574	6111	0.5903	6254	0.4911	2579	0.2094	2263	0.5945	1743	0.124	1394	-0.2874	5815	0.5545	5912	0.4457	3534	0.3078	3273
DDAH2	0.8039	189	0.018	210	-0.4717	7131	0.6613	7059	-0.3459	6102	0.5751	6084	0.3866	4063	0.3937	4189	0.3097	4864	0.4661	4936	0.6609	981	0.0964	1085	0.6941	858	0.0761	910	-0.7306	10060	0.9425	10024	0.7375	608	0.0614	687
RNF135	0.8028	190	0.0063	80	0.6373	1945	0.1578	1707	0.7668	388	0.0158	194	0.401	3901	0.3466	3684	0.5337	2511	0.1947	2164	0.4877	2616	0.214	2295	0.4065	3683	0.3276	3420	0.2313	5536	0.5192	5532	0.4173	3845	0.3394	3611
KRT6A	0.8026	191	0.1002	1125	0.463	3709	0.4278	4565	-0.7115	9957	0.8008	8438	0.8684	54	0.0489	509	-0.6667	9508	0.7484	7883	0.6392	1184	0.2667	2844	0.7725	343	0.131	1478	-0.9119	10657	0.9752	10383	-0.5542	8161	0.6301	6743
FOXN2	0.8018	192	0.0064	85	0.54	2978	0.2548	2741	0.6143	1738	0.1208	1396	0.6011	1674	0.1241	1323	0.3112	4848	0.4493	4759	0.4647	2878	0.2399	2563	-0.3482	5874	0.5712	6011	0.3664	4675	0.4247	4542	0.3702	4331	0.3919	4162
CCL4	0.8017	193	0.0425	484	0.8106	460	0.0699	739	-0.678	9693	0.8458	8913	0.7289	543	0.0973	1013	0.6314	1530	0.2033	2257	0.7534	379	0.0682	764	0.4035	3723	0.4018	4189	-0.7423	10139	0.9087	9638	0.6709	1134	0.1682	1780
SEC24D	0.8002	194	0.0194	225	-0.2776	5487	0.521	5488	0.651	1357	0.1235	1418	0.6881	832	0.0835	892	0.4909	2953	0.2854	3070	-0.3954	6283	0.5886	6240	0.6734	1048	0.0933	1087	0.4634	3590	0.3437	3705	0.7121	793	0.078	839
POLE4	0.8002	195	0.0194	227	-0.4665	7074	0.6574	7004	-0.5752	8603	0.8075	8523	0.3701	4237	0.4108	4358	0.636	1488	0.1344	1555	0.4705	2801	0.2745	2935	0.8022	215	0.0199	262	0.6288	1679	0.1617	1775	0.568	2224	0.2173	2330
SLITRK5	0.7998	196	0.0196	229	0.3596	4667	0.4428	4720	0.7864	287	0.0272	324	0.5849	1874	0.1824	2004	0.5544	2297	0.2194	2413	0.5912	1620	0.1573	1745	0.6533	1197	0.1104	1252	0.621	1757	0.1704	1863	-0.4933	7546	0.6945	7427
WBP11	0.7991	197	0.0433	495	-0.6205	8553	0.7492	7975	0.6707	1159	0.1606	1786	0.4138	3753	0.4016	4269	0.7688	387	0.0668	789	0.3416	4308	0.4391	4686	0.7852	280	0.0519	629	0.7015	931	0.139	1516	0.5705	2192	0.2779	2940
NCOA7	0.7987	198	0.0069	86	0.6728	1595	0.1268	1380	-0.5025	7823	0.7774	8167	-0.3205	5759	0.5534	5864	-0.5134	7855	0.779	8195	0.3575	4157	0.3676	3949	0.7833	290	0.0107	143	0.5214	2941	0.2399	2606	0.8196	199	0.0074	81
PCDHAC1	0.7986	199	0.02	233	0.5082	3292	0.3114	3332	0.5295	2624	0.2564	2734	-0.335	5883	0.5517	5845	0.744	515	0.049	570	0.6614	979	0.0962	1081	0.3491	4323	0.4227	4430	0.5454	2651	0.2559	2779	0.5204	2734	0.2663	2804
S100A14	0.7975	200	0.007	87	0.5332	3046	0.2612	2811	-0.3187	5865	0.5649	5976	0.5466	2269	0.1739	1897	0.7505	481	0.0209	268	0.6405	1169	0.0768	870	0.6364	1354	0.0889	1048	-0.716	9962	0.9613	10227	0.6134	1693	0.1307	1382
FHIT	0.7973	201	0.0206	240	-0.5271	7653	0.7097	7540	-0.5298	8123	0.7594	7997	0.591	1802	0.1771	1929	0.6439	1412	0.1282	1483	0.5927	1607	0.1557	1728	0.353	4293	0.4184	4383	-0.6995	9839	0.922	9794	0.6938	942	0.0917	978
DCP1A	0.7971	202	0.007	88	0.7179	1147	0.0885	924	-0.3455	6094	0.5897	6231	0.8073	196	0.0068	78	-0.5054	7773	0.7697	8094	0.614	1439	0.0987	1104	0.631	1408	0.0933	1088	-0.4653	7508	0.7419	7841	0.545	2483	0.1982	2135
NUDT9	0.7966	203	0.0072	91	0.5707	2634	0.2224	2352	0.3572	4553	0.4136	4385	0.6242	1416	0.1043	1084	0.2598	5168	0.4814	5106	0.732	493	0.0241	285	-0.3871	6296	0.6169	6499	0.4668	3539	0.3061	3280	-0.3685	6157	0.5891	6287
OBP2A	0.7962	204	0.1064	1194	0.6199	2125	0.3152	3383	-0.6498	9416	0.7339	7730	0.7078	688	0.2048	2226	0.8863	44	0.0377	427	0.7646	320	0.1347	1492	0.8512	88	0.0596	725	-0.75	10186	0.8456	8970	0.8205	196	0.0925	981
FBP1	0.7959	205	0.0213	247	0.3291	4883	0.4643	4935	-0.6193	9064	0.8524	8992	0.6297	1340	0.1361	1480	0.4948	2907	0.282	3018	0.857	70	0.0057	65	0.545	2174	0.2142	2307	-0.3544	6339	0.5941	6339	0.6435	1401	0.1404	1492
PDCD2	0.7954	206	0.0453	508	0.6287	2034	0.2466	2662	0.5586	2322	0.2872	3029	0.788	256	0.051	531	0.6445	1407	0.1875	2095	0.6	1547	0.2191	2350	0.7049	778	0.1169	1319	0.3226	5088	0.4862	5195	0.3118	4852	0.473	5048
CCNF	0.7953	207	0.0075	92	-0.6822	9188	0.891	9446	0.4905	3030	0.2542	2718	0.4129	3767	0.3302	3509	0.5323	2523	0.1968	2182	0.7304	505	0.0247	289	0.5253	2394	0.1904	2076	-0.6013	8937	0.8778	9320	0.5664	2244	0.1766	1886
ERN2	0.7952	208	0.0453	509	-0.6037	8397	0.7324	7803	0.3492	4638	0.462	4884	0.5569	2160	0.2764	2929	0.2891	5002	0.4837	5130	0.438	3183	0.3587	3853	0.3564	4259	0.4407	4637	0.828	161	0.0348	392	-0.7881	10281	0.9312	9908
CITED1	0.7949	209	0.0455	510	0.4645	3693	0.3804	4071	-0.3806	6439	0.5691	6019	0.67	992	0.1545	1693	0.3122	4838	0.4749	5014	0.8403	96	0.022	259	0.7357	547	0.089	1049	0.7864	334	0.0614	686	-0.3133	5667	0.5114	5454
SNX29	0.7943	210	0.0458	512	0.94	55	0.0072	97	0.728	638	0.1024	1186	0.3166	4764	0.4703	4990	0.4706	3177	0.3527	3800	0.5698	1830	0.2475	2633	0.8035	209	0.0412	506	0.729	704	0.1117	1236	0.3369	4630	0.4607	4898
SMARCA1	0.794	211	0.0078	98	0.8651	220	0.0115	138	0.7071	802	0.0434	524	0.2769	5069	0.4688	4978	0.5631	2216	0.1641	1844	0.501	2471	0.1984	2153	0.5283	2350	0.1873	2046	-0.6481	9386	0.9185	9752	0.7145	781	0.0459	527
KRT14	0.7939	212	0.0219	256	-0.383	6249	0.5889	6251	0.6048	1826	0.1707	1884	0.597	1728	0.1717	1872	0.8374	137	0.0102	147	0.6413	1160	0.1132	1250	0.4303	3381	0.3345	3482	-0.8153	10489	0.9848	10498	-0.2515	5334	0.5034	5368
ADAT1	0.7936	213	0.0219	255	0.8131	454	0.0452	495	0.3716	4414	0.4257	4512	0.6949	786	0.0783	844	0.4357	3594	0.3426	3689	0.4155	3479	0.3354	3614	0.736	544	0.0494	597	0.4509	3728	0.3552	3846	0.685	1009	0.1006	1046
TPP2	0.7936	214	0.008	99	-0.2905	5553	0.5318	5614	0.3722	4408	0.3963	4235	0.5624	2098	0.1597	1750	0.2807	5051	0.4704	4970	0.5393	2139	0.1607	1773	0.6305	1414	0.0937	1097	-0.6395	9296	0.9121	9674	0.6405	1429	0.1063	1114
CORIN	0.7936	215	0.0219	254	0.774	694	0.0707	745	-0.4877	7658	0.7165	7543	0.7667	340	0.0342	385	0.6592	1252	0.1133	1331	0.3714	4009	0.3834	4099	-0.4172	6692	0.6233	6582	0.6871	1058	0.1017	1105	0.405	3970	0.383	4069
FRAT1	0.7934	216	0.0219	257	-0.6402	8772	0.8197	8688	0.5663	2240	0.2137	2316	0.7221	592	0.0595	633	-0.6659	9497	0.8927	9418	0.7714	280	0.0283	333	0.7329	563	0.0512	616	0.4279	3997	0.3815	4093	0.6956	924	0.0901	965
MEGF6	0.7934	217	0.1087	1213	-0.3404	5894	0.5127	5402	-0.6333	9243	0.7165	7542	0.8652	60	0.051	532	0.85	102	0.0629	749	0.6518	1060	0.2553	2722	0.7441	498	0.1624	1816	0.8757	69	0.0475	531	0.7073	824	0.2114	2263
PDIA4	0.7934	218	0.0464	518	0.7996	532	0.0789	830	0.464	3308	0.3703	3941	0.6002	1690	0.235	2516	-0.8365	10542	0.9734	10357	0.5189	2322	0.2889	3100	0.7041	786	0.1176	1324	-0.8077	10461	0.9573	10195	-0.5627	8263	0.7048	7539
ARHGAP40	0.7929	219	0.1095	1223	0.6944	1383	0.2433	2627	0.5418	2489	0.3746	3987	0.853	82	0.0596	634	-0.6012	8827	0.6774	7147	0.5093	2408	0.369	3965	0.5522	2108	0.3452	3612	-0.9039	10652	0.9722	10341	0.7327	636	0.1859	2018
KRT5	0.7926	220	0.1098	1228	0.756	818	0.1775	1913	-0.638	9299	0.7212	7593	-0.3515	6036	0.5125	5423	0.5222	2639	0.3794	4046	0.7299	507	0.173	1909	0.613	1561	0.2946	3099	0.6418	1532	0.2893	3113	0.8098	237	0.1032	1074
PKD1	0.7926	221	0.1099	1229	-0.8496	10402	0.9198	9790	-0.6331	9240	0.7164	7541	0.8662	58	0.0507	528	0.7878	308	0.1207	1402	0.8712	49	0.0446	508	0.6376	1343	0.2727	2869	-0.8841	10628	0.9623	10240	0.4331	3661	0.4413	4687
C19orf48	0.7925	222	0.008	101	0.5904	2435	0.2019	2151	-0.2814	5592	0.537	5667	0.7473	437	0.0208	249	0.2697	5102	0.477	5032	0.3886	3810	0.3304	3555	0.6215	1483	0.1021	1169	-0.4904	7788	0.7681	8116	0.7195	739	0.0428	498
ADM	0.7923	223	0.0222	261	0.4649	3686	0.3492	3762	0.3003	5042	0.4844	5128	-0.3864	6426	0.6009	6380	0.2846	5032	0.4838	5131	0.4316	3266	0.3175	3403	0.8447	106	0.0083	119	0.5798	2225	0.2163	2352	0.4013	4007	0.3858	4105
THADA	0.7922	224	0.008	100	-0.5884	8244	0.8027	8520	0.6381	1487	0.0988	1151	0.6352	1283	0.0949	987	-0.4432	7082	0.6949	7353	0.5528	2006	0.1479	1649	0.5403	2219	0.1721	1902	0.5044	3130	0.2606	2838	0.6738	1108	0.0769	829
FGR	0.792	225	0.0474	528	0.4649	3687	0.3803	4068	-0.4509	7243	0.6279	6626	-0.7184	10001	0.8873	9384	0.4945	2915	0.3343	3617	0.6319	1257	0.1833	2005	0.6192	1502	0.2089	2255	-0.6087	9007	0.7753	8190	0.4298	3707	0.394	4191
CNOT6L	0.7919	226	0.0226	264	0.8333	346	0.035	395	-0.3088	5784	0.5445	5752	-0.4896	7626	0.7067	7506	0.7519	471	0.0445	512	0.3888	3809	0.3638	3908	0.4196	3511	0.3459	3617	-0.5232	8115	0.7555	7984	0.4269	3742	0.3576	3790
ZNF250	0.7913	227	0.0082	102	0.8015	517	0.0333	371	0.7154	735	0.0386	468	0.626	1391	0.1025	1063	0.4169	3804	0.3315	3590	0.5171	2336	0.1813	1991	0.6177	1520	0.1055	1205	0.7813	366	0.0151	172	0.7238	701	0.0409	470
CALR3	0.7912	228	0.0229	268	0.4888	3472	0.3274	3521	0.58	2078	0.1985	2158	0.4791	2991	0.2906	3083	0.7686	388	0.0346	399	-0.3336	5613	0.5248	5589	0.6818	982	0.0867	1023	0.6426	1524	0.1477	1607	0.3893	4148	0.3989	4242
RAB19	0.791	229	0.0033	55	0.6843	1480	0.0947	999	-0.3688	6323	0.6465	6816	0.6074	1600	0.0882	932	0.6779	1072	0.0419	480	0.6855	772	0.0275	318	0.8572	76	0.0005	13	0.6031	1956	0.114	1265	-0.4791	7382	0.7563	8062
TLL1	0.7908	230	0.0483	537	0.7698	723	0.1049	1116	0.7622	416	0.0734	860	-0.7945	10425	0.9519	10112	0.478	3098	0.3466	3736	0.6923	731	0.1231	1347	0.5951	1731	0.2323	2486	0.5507	2596	0.3094	3327	0.2888	5002	0.4821	5136
CMTM5	0.7902	231	0.0232	269	0.4203	4108	0.3911	4182	-0.5436	8274	0.7742	8143	0.7205	607	0.0602	645	0.7886	305	0.0259	312	-0.427	6673	0.6216	6604	0.2769	4936	0.4765	5012	-0.2905	5829	0.5451	5801	0.5267	2664	0.2619	2757
SLC38A1	0.7901	232	0.0084	103	0.6956	1371	0.1061	1131	0.5628	2276	0.1708	1885	0.2657	5113	0.4754	5029	-0.5895	8677	0.8589	9070	0.4208	3415	0.2901	3117	-0.3522	5911	0.5757	6057	0.7814	365	0.0151	170	0.6935	944	0.0596	667
SLC6A5	0.7894	233	0.0233	270	-0.7151	9499	0.8892	9422	0.4939	3000	0.2925	3092	-0.6557	9462	0.8869	9380	0.7357	569	0.0535	635	0.279	4814	0.461	4918	0.7478	479	0.0428	525	0.5784	2247	0.2186	2376	0.8522	98	0.0093	98
ATPAF2	0.7893	234	0.0087	108	0.3561	4700	0.4297	4585	0.6289	1585	0.1066	1237	0.6725	973	0.065	693	0.6868	1002	0.0555	657	0.5837	1695	0.1227	1341	0.7309	580	0.028	347	0.6518	1408	0.099	1078	-0.7064	9744	0.9419	10017
C12orf5	0.7893	235	0.0087	106	0.4311	4002	0.359	3837	-0.3929	6569	0.645	6796	0.4083	3819	0.3373	3579	0.6202	1644	0.1109	1302	0.6291	1290	0.0858	964	0.4453	3218	0.2795	2927	-0.3761	6577	0.6331	6751	0.5248	2692	0.2211	2375
DPYD	0.7891	236	0.0087	107	0.4094	4215	0.3814	4079	0.4598	3360	0.2917	3074	-0.617	9063	0.892	9433	0.5742	2103	0.1553	1739	0.4946	2542	0.2055	2228	0.6892	911	0.0505	607	-0.439	7222	0.7098	7538	0.6259	1568	0.1191	1254
UBE2B	0.789	237	0.049	553	-0.444	6841	0.5989	6370	0.5716	2188	0.2749	2917	0.5287	2468	0.3002	3186	0.2567	5184	0.4916	5201	0.3765	3950	0.4155	4444	0.8206	158	0.0333	416	0.3826	4471	0.4487	4786	0.5045	2907	0.336	3592
ADCYAP1R1	0.7882	238	0.0238	274	0.2813	5175	0.4927	5233	-0.7871	10391	0.9766	10384	0.7122	662	0.0667	707	0.7842	321	0.0276	325	-0.361	5893	0.5504	5848	0.5359	2268	0.223	2397	0.6808	1120	0.1092	1196	0.8065	250	0.0229	285
PITPNM1	0.788	239	0.024	279	-0.7009	9373	0.8747	9279	-0.4072	6737	0.6338	6675	0.6197	1464	0.1465	1601	0.7254	668	0.0601	712	0.6586	998	0.0991	1111	0.673	1052	0.0937	1093	-0.4577	7427	0.69	7331	-0.5948	8619	0.7998	8507
PHF12	0.7879	240	0.1141	1269	0.5815	2517	0.3483	3757	-0.4072	6740	0.5462	5767	-0.3583	6106	0.5145	5447	0.5393	2453	0.368	3937	0.8094	158	0.0915	1024	0.7036	788	0.206	2216	-0.4103	6934	0.5494	5845	0.6334	1506	0.2906	3075
TREM1	0.7878	241	0.0242	280	0.6719	1605	0.1567	1695	0.7345	591	0.0553	659	0.4951	2822	0.2751	2904	0.4653	3225	0.31	3348	0.6583	1005	0.0994	1117	0.7581	420	0.0377	477	-0.4813	7698	0.7139	7578	0.4819	3130	0.3035	3229
HOXA7	0.7876	242	0.1142	1270	0.9082	113	0.0404	451	0.8801	62	0.0419	506	0.4624	3181	0.4149	4407	0.6905	971	0.2245	2456	0.6432	1147	0.2634	2803	0.3913	3876	0.4524	4759	0.5902	2111	0.3387	3649	0.2649	5129	0.4951	5270
ATRN	0.7874	243	0.0244	284	-0.4308	6722	0.6289	6708	0.4716	3223	0.3148	3344	0.6794	925	0.0908	956	-0.747	10167	0.9542	10147	0.6554	1029	0.1015	1144	0.8644	66	0.0053	79	0.3644	4701	0.45	4800	-0.5165	7759	0.7174	7656
CNNM3	0.7873	244	0.1145	1274	0.6196	2128	0.3153	3385	0.9162	29	0.0201	250	0.52	2577	0.376	4006	-0.8381	10545	0.9315	9876	0.5804	1734	0.3187	3416	-0.5177	7857	0.5926	6223	0.9233	17	0.0184	199	0.6745	1104	0.248	2638
NSMCE1	0.7872	245	0.009	110	0.5657	2695	0.2276	2425	-0.3333	5995	0.5777	6115	0.7057	703	0.0413	440	0.6591	1253	0.0774	921	0.5955	1580	0.1123	1238	0.7516	452	0.0189	243	-0.6278	9189	0.9016	9561	0.3526	4493	0.4086	4326
ANK3	0.787	246	0.0246	286	0.3647	4625	0.4385	4672	-0.6036	8900	0.8375	8832	0.2784	5058	0.4843	5118	-0.5387	8119	0.7602	7988	0.6324	1248	0.1216	1326	0.424	3455	0.341	3558	-0.7581	10242	0.9602	10219	0.8243	185	0.0173	214
NEK7	0.7869	247	0.0247	287	0.5834	2502	0.2423	2619	-0.7672	10294	0.9655	10266	0.5938	1767	0.1742	1900	0.624	1615	0.1472	1669	0.896	26	0.0016	18	0.8874	35	0.0025	46	-0.6592	9497	0.8881	9426	0.4099	3917	0.3766	3997
H2AFZ	0.7866	248	0.0247	289	0.4709	3635	0.3432	3700	0.7873	285	0.0268	321	0.4273	3587	0.346	3676	0.5059	2807	0.2695	2898	0.3406	4313	0.4163	4450	0.2888	4857	0.47	4937	0.5665	2385	0.2323	2529	0.8041	261	0.0237	301
LONRF1	0.7865	249	0.0247	288	-0.5189	7582	0.7023	7471	0.72	701	0.0653	768	0.5235	2533	0.2442	2620	0.3434	4572	0.4414	4670	0.5763	1779	0.1729	1907	0.4189	3520	0.3467	3624	-0.5208	8089	0.7531	7952	0.6787	1074	0.1069	1118
SH3TC2	0.7863	250	0.0506	570	-0.4813	7223	0.6252	6685	0.5879	1998	0.2589	2754	-0.5359	8141	0.69	7335	0.3429	4576	0.4585	4850	0.7662	308	0.0603	680	0.5211	2422	0.2964	3115	-0.9124	10658	0.9952	10601	0.6839	1019	0.1524	1627
AQP2	0.7862	251	0.1159	1296	0.7531	844	0.1818	1958	0.4942	2997	0.4094	4355	0.5133	2644	0.3798	4042	0.7516	474	0.1582	1776	0.8517	79	0.0569	647	0.8177	165	0.0883	1036	-0.8708	10612	0.9543	10158	-0.4764	7362	0.5778	6172
DDX46	0.786	252	0.0092	114	0.8541	264	0.0139	174	-0.5736	8584	0.8478	8936	0.7374	495	0.0255	292	0.7127	774	0.0398	462	0.4884	2607	0.2134	2294	0.8096	191	0.0057	83	0.6996	954	0.0575	641	0.27	5103	0.4715	5030
SKIV2L	0.7859	253	0.0092	111	0.5559	2805	0.2375	2557	-0.4219	6913	0.6801	7169	0.8329	130	0.0032	37	0.7191	718	0.0367	419	0.4654	2866	0.239	2554	0.6793	1002	0.0568	687	0.6725	1198	0.0799	878	0.456	3423	0.2961	3140
NUB1	0.7858	254	0.0251	297	0.5056	3314	0.3139	3367	0.5115	2792	0.2737	2909	0.5037	2740	0.2647	2816	0.7063	820	0.0736	875	0.6463	1108	0.1082	1201	0.7042	784	0.0694	833	-0.6174	9095	0.8509	9021	0.7545	500	0.0514	580
CKM	0.7857	255	0.0251	296	0.2715	5222	0.4965	5266	0.4561	3397	0.3323	3541	0.3931	3987	0.3863	4113	0.534	2507	0.2406	2603	0.6585	1001	0.0992	1112	0.6636	1130	0.1025	1175	-0.55	8407	0.782	8262	-0.4412	6954	0.6433	6887
RALGPS2	0.7857	256	0.0092	112	0.6665	1651	0.1318	1424	-0.4312	7020	0.6915	7285	-0.2674	5399	0.512	5417	0.2986	4930	0.4585	4849	0.6198	1386	0.0936	1048	0.6412	1299	0.0853	1006	-0.4025	6839	0.666	7075	0.2971	4949	0.4561	4846
FGF16	0.7857	257	0.0507	571	0.7986	539	0.0795	835	0.7857	289	0.0539	639	0.6232	1422	0.2087	2266	0.7807	334	0.0582	683	0.8321	107	0.0256	300	0.4953	2704	0.3182	3330	-0.5888	8787	0.7521	7941	0.577	2100	0.2718	2864
THOC2	0.7855	258	0.0507	572	0.5761	2574	0.2959	3180	-0.5502	8341	0.7111	7497	0.4607	3201	0.357	3804	0.3543	4462	0.4509	4780	0.5134	2370	0.2918	3135	0.4654	3009	0.344	3595	-0.5753	8653	0.7385	7802	-0.5665	8311	0.7083	7574
ZNF17	0.7854	259	0.0251	294	0.5643	2718	0.2588	2784	0.8296	158	0.0121	157	-0.3474	5994	0.5642	5977	0.8453	107	0.0087	119	0.4326	3251	0.3159	3390	0.8204	159	0.0138	187	-0.4605	7445	0.6928	7357	0.7237	703	0.0703	764
RNF138	0.7854	260	0.1169	1311	-0.8659	10452	0.9313	9901	-0.8864	10623	0.9654	10264	0.8281	144	0.079	852	0.8085	230	0.099	1141	0.6438	1138	0.263	2799	0.8704	56	0.0478	569	-0.7448	10158	0.8391	8906	0.5971	1889	0.3254	3477
UBE3A	0.7849	261	0.0253	301	0.6647	1670	0.1637	1767	0.3602	4524	0.4364	4638	0.8456	96	0.0083	109	0.7596	434	0.0401	466	0.8252	125	0.0102	119	-0.6988	9840	0.9235	9801	-0.5224	8112	0.7545	7974	0.8591	84	0.0078	88
INSRR	0.7847	262	0.0254	302	0.431	4003	0.3803	4069	0.7162	730	0.0678	795	0.8837	39	0.0032	40	-0.5109	7830	0.7289	7705	0.8331	105	0.0089	101	0.7405	514	0.047	558	-0.722	9999	0.9374	9956	0.6522	1325	0.1318	1391
CHRNA3	0.7841	263	0.0095	117	0.3848	4448	0.4042	4314	0.5519	2390	0.1828	2006	0.6282	1356	0.1012	1044	0.2452	5217	0.4884	5178	0.6894	750	0.0447	510	0.6897	906	0.0503	603	-0.3897	6696	0.6521	6916	0.5236	2704	0.2223	2384
HCCS	0.784	264	0.0095	118	0.7965	549	0.0349	390	0.8887	53	0.0004	12	0.4593	3213	0.2747	2895	-0.4484	7142	0.7018	7423	0.352	4203	0.3745	4022	0.8607	70	0.001	25	0.5968	2035	0.1543	1674	0.6958	921	0.0572	647
LSMD1	0.7838	265	0.0256	303	0.8505	279	0.0267	304	0.3889	4230	0.4071	4339	0.3802	4133	0.4017	4271	0.7716	366	0.0335	385	0.6398	1177	0.1144	1258	0.6469	1257	0.1164	1314	-0.5778	8670	0.8118	8588	-0.5453	8070	0.748	7992
GPR144	0.7833	266	0.0096	119	0.6273	2051	0.1671	1796	0.7702	373	0.0152	186	0.3778	4159	0.3727	3965	0.7042	846	0.045	519	0.5094	2407	0.1906	2073	0.6718	1062	0.0618	753	0.5161	3004	0.2477	2690	-0.5578	8205	0.8026	8537
UGT2B17	0.7833	267	0.1191	1339	0.7811	642	0.151	1620	0.6932	929	0.224	2410	0.8371	117	0.0716	775	0.7572	444	0.1511	1712	-0.4449	6885	0.5446	5784	0.8213	157	0.0851	1002	0.5981	2017	0.3325	3574	0.9006	28	0.0314	367
ECI2	0.7833	268	0.0258	304	-0.5536	7909	0.7351	7830	-0.6924	9811	0.9176	9744	0.7157	637	0.0641	678	0.3398	4617	0.4433	4696	0.7519	383	0.037	433	0.8149	175	0.0155	209	0.3164	5141	0.4883	5225	0.5257	2681	0.2622	2762
BCORP1	0.7832	269	0.0096	120	0.663	1686	0.1346	1451	0.4844	3092	0.2621	2786	-0.3434	5960	0.5758	6095	-0.2078	5282	0.4985	5268	0.5546	1986	0.1467	1638	0.6271	1433	0.0967	1115	0.3516	4831	0.4415	4703	0.4931	3033	0.2544	2698
ABCB4	0.7832	270	0.0096	121	0.8744	196	0.0097	119	0.6733	1132	0.0675	791	0.7205	608	0.0343	392	0.2518	5199	0.4859	5151	0.2201	5017	0.4638	4950	0.7143	723	0.0361	453	0.2966	5277	0.4885	5228	0.813	226	0.0083	93
ZFR	0.7826	271	0.0098	124	-0.3393	5889	0.565	6007	-0.6932	9819	0.9495	10107	0.5514	2212	0.1701	1850	0.6388	1460	0.0952	1108	0.7693	291	0.0118	139	0.3147	4653	0.4325	4533	-0.4206	7032	0.687	7298	0.8142	221	0.0081	90
TAOK1	0.7825	272	0.0259	305	0.9157	94	0.0075	100	0.6866	986	0.0897	1062	-0.3939	6526	0.6088	6471	0.5241	2619	0.251	2713	0.8443	89	0.0073	86	0.3337	4472	0.4356	4573	0.5509	2593	0.2511	2732	0.7155	775	0.0756	821
SULT1E1	0.7824	273	0.0098	125	0.4931	3426	0.2987	3205	-0.6392	9309	0.9112	9671	0.6207	1453	0.1079	1127	0.2857	5028	0.4676	4953	0.6303	1272	0.0851	956	0.2955	4809	0.4476	4709	-0.2656	5702	0.5407	5759	0.6884	981	0.0645	716
MVK	0.7823	274	0.1198	1344	0.7754	686	0.1572	1699	-0.3526	6171	0.5203	5477	0.707	694	0.2054	2230	0.6305	1541	0.2876	3093	0.8576	69	0.0534	612	0.6855	945	0.2255	2417	-0.7007	9851	0.787	8317	0.612	1708	0.3128	3331
PPFIA1	0.7823	275	0.0098	127	-0.5117	7518	0.7285	7760	0.5473	2440	0.1877	2058	-0.5088	7845	0.777	8211	0.8151	203	0.006	88	0.7267	529	0.0261	305	0.4832	2813	0.2367	2533	0.4963	3215	0.2709	2940	0.6088	1753	0.1359	1443
SLC52A2	0.7821	276	0.026	309	0.6777	1546	0.1517	1629	0.6494	1373	0.1249	1439	0.6937	793	0.0789	851	0.5278	2574	0.2466	2667	0.5579	1949	0.1902	2067	0.6378	1340	0.125	1408	-0.2419	5624	0.5303	5654	0.8494	102	0.0103	106
NFATC4	0.7821	277	0.026	310	0.8245	399	0.0393	440	0.3732	4395	0.424	4493	0.7098	675	0.0684	725	0.9034	32	0.0012	30	0.7016	661	0.0646	729	0.6196	1499	0.1425	1616	-0.5749	8650	0.8094	8555	0.555	2379	0.2316	2475
HK3	0.782	278	0.026	307	-0.5054	7457	0.6904	7339	0.4881	3049	0.2983	3147	0.5757	1959	0.193	2108	-0.2905	5549	0.5239	5545	0.7683	296	0.0292	346	0.4092	3642	0.3563	3726	0.7775	396	0.0363	409	0.6084	1760	0.176	1880
OR2G3	0.7819	279	0.0098	123	-0.5446	7819	0.7576	8062	0.6012	1867	0.1343	1520	0.4321	3537	0.3083	3272	-0.479	7485	0.7397	7807	0.501	2474	0.1985	2156	-0.5894	8729	0.8609	9106	0.6596	1331	0.0916	1007	0.8227	192	0.007	75
PBX4	0.7819	280	0.026	308	-0.3683	6115	0.5758	6128	-0.595	8799	0.829	8730	-0.3497	6013	0.5665	5996	0.7243	683	0.0605	721	0.554	1991	0.1932	2104	0.8044	202	0.0191	248	-0.8176	10501	0.9858	10506	0.4925	3041	0.2957	3134
RNASE8	0.7815	281	0.0262	311	-0.6222	8575	0.8027	8519	0.7257	659	0.0616	730	0.5659	2070	0.2022	2203	0.8755	61	0.0043	67	0.6831	795	0.0777	882	0.6743	1042	0.0926	1080	0.7398	626	0.0598	670	0.4802	3155	0.3052	3248
STK36	0.7814	282	0.0533	588	-0.5272	7655	0.6594	7028	0.2929	5081	0.4899	5162	0.8917	36	0.0075	93	0.4889	2977	0.3391	3657	0.8219	135	0.0299	359	-0.6242	9103	0.7854	8297	0.5336	2812	0.3257	3501	-0.4054	6563	0.5726	6117
HPS6	0.7813	283	0.0102	130	-0.4253	6677	0.6431	6850	-0.255	5460	0.5217	5494	-0.2612	5372	0.5087	5386	0.8074	234	0.0072	105	0.5269	2244	0.1717	1894	0.7738	334	0.0131	175	-0.5185	8062	0.7961	8417	0.4805	3151	0.2686	2825
SLCO1B7	0.7812	284	0.0533	590	0.3312	4875	0.4723	5026	0.697	891	0.1312	1495	0.4193	3687	0.3963	4216	0.5885	1948	0.2527	2726	0.4069	3583	0.3877	4141	0.6056	1635	0.2215	2382	0.8376	134	0.0299	329	0.6174	1659	0.2303	2455
STX6	0.7806	285	0.0104	131	0.3269	4904	0.4531	4836	-0.5065	7878	0.7812	8215	0.5649	2077	0.1576	1724	0.6058	1783	0.1247	1444	0.6343	1228	0.0823	925	0.3273	4540	0.4206	4407	0.4006	4282	0.3862	4133	0.3331	4661	0.4279	4523
PNPT1	0.7795	286	0.0104	132	0.6622	1693	0.1351	1459	0.6397	1474	0.0976	1139	0.3022	4878	0.4528	4776	0.6809	1049	0.061	727	0.7156	589	0.0303	365	0.6672	1100	0.0648	791	0.4293	3977	0.3526	3808	0.7303	652	0.0373	432
ATF7IP2	0.7794	287	0.0107	133	0.6547	1759	0.1423	1528	-0.4356	7068	0.6982	7337	0.2903	4966	0.4597	4863	0.3198	4777	0.4415	4672	0.4997	2490	0.2006	2175	0.6806	991	0.0561	680	-0.4752	7631	0.7522	7944	0.4105	3903	0.3473	3674
NFAT5	0.7786	288	0.0109	135	-0.7302	9621	0.9261	9848	-0.3575	6219	0.602	6365	0.687	841	0.0535	556	0.3866	4123	0.3684	3950	-0.4094	6460	0.6298	6680	0.4856	2794	0.2336	2506	0.6667	1264	0.0854	946	0.4377	3611	0.3152	3368
PCDHA12	0.7786	289	0.0109	134	-0.6605	8983	0.8739	9268	-0.3733	6370	0.6201	6540	0.4832	2944	0.246	2642	0.5713	2135	0.1569	1758	0.5695	1834	0.1344	1485	-0.5078	7742	0.7708	8121	-0.5842	8734	0.86	9119	0.3953	4083	0.3649	3878
SPINT1	0.7781	290	0.055	615	0.4832	3528	0.3665	3918	0.507	2842	0.336	3577	0.444	3388	0.3718	3960	-0.5664	8423	0.7207	7613	0.7962	193	0.0422	480	0.6921	881	0.1295	1450	-0.3565	6362	0.5564	5931	0.6108	1722	0.2371	2540
MYL4	0.778	291	0.0278	327	-0.5006	7399	0.6869	7291	0.4306	3715	0.3589	3815	-0.5178	7947	0.7393	7842	-0.5619	8369	0.7862	8266	0.7743	261	0.0276	320	-0.5048	7708	0.7175	7585	0.7078	873	0.0826	911	0.6399	1432	0.144	1536
OR7G2	0.778	292	0.0278	328	0.3647	4624	0.4384	4668	0.4788	3145	0.3069	3254	0.4494	3323	0.3233	3439	0.6719	1130	0.1018	1180	0.6647	953	0.0931	1043	0.6557	1184	0.1088	1231	-0.2752	5738	0.5399	5749	0.3517	4500	0.4337	4607
MOCS2	0.7777	293	0.0278	326	0.8007	522	0.0521	559	-0.5188	8002	0.7481	7883	-0.5563	8368	0.7825	8258	0.8512	99	0.0077	111	0.3184	4532	0.435	4639	0.6969	832	0.0744	887	0.2934	5302	0.5056	5395	0.4666	3322	0.3181	3403
SLC25A4	0.7776	294	0.0112	139	0.7679	740	0.0507	539	-0.5465	8302	0.8223	8664	0.5904	1807	0.1332	1440	-0.3357	5904	0.5674	5997	0.3536	4191	0.3726	4003	0.4797	2846	0.2409	2573	-0.3971	6775	0.6602	7009	0.5584	2333	0.1842	1999
OTOR	0.7776	295	0.0112	140	0.5675	2673	0.2253	2403	0.4636	3315	0.2881	3034	0.6622	1059	0.0715	773	0.307	4873	0.4527	4792	0.6773	832	0.0519	580	0.3856	3943	0.3525	3690	-0.5459	8361	0.8227	8733	0.5055	2902	0.2413	2575
MS4A1	0.7776	296	0.0279	331	-0.5332	7707	0.7147	7600	-0.5043	7844	0.7342	7732	0.7309	526	0.0537	557	0.7197	712	0.0632	753	0.2508	4941	0.4721	5028	-0.4546	7128	0.6618	7025	0.6999	952	0.0887	982	0.7865	350	0.0323	381
GLS	0.7775	297	0.0112	138	-0.6721	9085	0.8833	9355	-0.4424	7150	0.7057	7436	0.4426	3401	0.2949	3127	0.5262	2593	0.2039	2264	0.6267	1317	0.0881	991	0.6451	1277	0.0814	966	0.4189	4083	0.3642	3924	0.6441	1398	0.1033	1077
EDAR	0.7774	298	0.0279	332	0.7508	865	0.0876	916	0.7131	754	0.0703	821	0.5356	2382	0.233	2491	0.3099	4860	0.4658	4934	0.7834	232	0.0235	281	0.4506	3150	0.3097	3235	0.8101	223	0.0211	235	0.3307	4689	0.4484	4756
TAS2R19	0.7769	299	0.0279	330	0.6086	2234	0.2179	2295	0.5507	2414	0.2323	2481	0.3904	4025	0.3891	4148	0.6716	1136	0.1019	1182	-0.307	5411	0.5095	5423	0.5672	1991	0.1933	2096	-0.5893	8796	0.8222	8724	0.7008	871	0.0857	907
ALX3	0.7765	300	0.028	333	-0.2459	5378	0.5125	5399	0.5832	2038	0.1962	2137	0.6029	1655	0.1654	1811	0.6069	1771	0.1655	1854	0.8236	131	0.0107	126	0.4877	2771	0.2714	2853	-0.5021	7901	0.7344	7777	-0.4224	6754	0.6263	6682
ZNF434	0.7763	301	0.0114	142	0.801	520	0.0336	374	0.3243	4856	0.4474	4748	0.7388	485	0.0251	287	0.5848	1990	0.1443	1636	0.6758	850	0.0525	596	-0.2678	5283	0.5032	5295	0.3632	4718	0.4287	4582	0.4046	3976	0.3541	3756
SLC25A32	0.7756	302	0.0117	146	0.5487	2887	0.2451	2648	0.5969	1900	0.1388	1563	0.8061	202	0.007	85	0.4878	2987	0.2467	2670	-0.4277	6685	0.6539	6915	-0.3365	5767	0.5596	5890	-0.5048	7932	0.7833	8282	0.2705	5102	0.4712	5027
NDUFV1	0.7756	303	0.0287	340	-0.6352	8710	0.8142	8640	0.8698	77	0.0051	73	0.7808	281	0.0275	318	0.3414	4592	0.4428	4687	-0.679	9622	0.905	9570	0.5069	2578	0.2507	2669	0.5339	2807	0.2689	2920	-0.4045	6551	0.6103	6493
PRKDC	0.7752	304	0.057	627	0.7906	594	0.0863	899	0.5476	2437	0.2979	3141	0.8834	40	0.0092	118	0.8178	194	0.0354	403	0.3666	4060	0.4216	4495	0.8513	87	0.0197	261	-0.7358	10103	0.9036	9582	0.7173	758	0.12	1266
SI	0.7751	305	0.0121	148	0.5511	2863	0.2422	2616	0.4576	3388	0.2945	3111	0.4476	3349	0.289	3059	-0.3937	6502	0.634	6706	0.7364	470	0.0218	257	0.5374	2251	0.176	1933	-0.3581	6377	0.6141	6551	0.6946	934	0.0581	654
PKIA	0.775	306	0.0291	346	-0.6366	8733	0.8156	8657	0.4664	3280	0.3214	3422	-0.2987	5597	0.5264	5583	0.7615	423	0.0394	449	0.6576	1013	0.1001	1125	0.6676	1095	0.0988	1137	-0.5945	8852	0.8275	8788	0.5774	2093	0.2077	2220
HNRNPK	0.7748	307	0.0573	631	-0.7202	9546	0.8512	9010	0.6822	1038	0.1467	1644	-0.5875	8751	0.7455	7899	0.7249	675	0.1042	1223	0.7734	266	0.0556	640	0.8715	53	0.0122	166	0.3617	4732	0.4641	4958	-0.5707	8350	0.7122	7607
PRKAR2B	0.7746	308	0.0292	350	0.5209	3175	0.2995	3216	-0.8162	10488	0.9853	10483	0.31	4814	0.4635	4908	0.7082	806	0.0725	862	0.6771	836	0.0818	919	0.4357	3321	0.3289	3436	-0.3199	6046	0.564	6015	0.6218	1621	0.1626	1714
KRTAP10-5	0.7739	309	0.1285	1420	-0.4524	6925	0.5613	5969	0.8911	49	0.0345	420	-0.7579	10264	0.8567	9070	0.7952	281	0.1118	1310	0.3038	4656	0.4826	5135	0.8886	34	0.0366	463	0.8943	46	0.0354	400	0.8116	230	0.101	1054
FZD1	0.7736	310	0.0128	156	-0.5713	8080	0.7853	8351	0.6307	1573	0.1054	1223	0.4417	3413	0.2953	3135	0.4892	2973	0.2451	2656	0.6101	1469	0.1013	1139	0.47	2966	0.2511	2677	-0.5757	8656	0.8522	9040	-0.2516	5336	0.5012	5339
LGALS17A	0.7735	311	0.1289	1423	-0.5917	8278	0.6562	6990	0.703	835	0.2139	2319	0.8781	46	0.0422	445	0.7778	343	0.1293	1494	0.7536	376	0.1465	1636	0.659	1162	0.252	2680	0.3158	5147	0.4973	5317	0.7137	783	0.2054	2199
NCF4	0.7734	312	0.0298	354	0.7098	1226	0.1196	1292	0.5559	2345	0.2254	2418	0.6267	1374	0.1393	1514	0.7723	362	0.033	378	0.7283	520	0.0493	553	0.3656	4157	0.4062	4230	0.4218	4050	0.3884	4149	0.4378	3607	0.3484	3691
ALOX12B	0.7732	313	0.03	359	0.8442	304	0.0296	333	-0.3835	6467	0.6105	6440	0.8292	140	0.0114	138	-0.452	7188	0.6673	7053	0.5124	2382	0.2332	2490	0.7654	378	0.0341	426	0.5156	3009	0.289	3110	0.6714	1131	0.1121	1179
CXCL2	0.7728	314	0.0585	643	-0.8244	10274	0.9384	9985	-0.3943	6593	0.5802	6133	0.7546	390	0.0742	812	0.9099	25	0.0049	78	0.5801	1738	0.2373	2531	0.4672	2993	0.3429	3578	0.5053	3116	0.3466	3734	0.7438	564	0.0956	1007
MYLK2	0.7727	315	0.1296	1437	0.8104	462	0.1213	1316	0.6138	1740	0.3099	3285	0.8372	116	0.0716	776	0.572	2122	0.3409	3676	0.7206	566	0.1823	1997	0.6953	842	0.2153	2318	-0.4004	6812	0.544	5792	0.569	2214	0.3492	3703
SFTPA1	0.7726	316	0.1299	1442	0.9114	104	0.0386	434	0.7736	359	0.1349	1528	0.6819	899	0.2324	2485	0.5679	2172	0.3457	3721	0.7901	211	0.1092	1209	0.9183	14	0.0187	240	-0.8113	10476	0.9075	9630	0.3666	4372	0.472	5039
NQO2	0.7725	317	0.0134	160	0.5436	2940	0.2519	2713	0.6041	1834	0.1307	1491	0.5817	1910	0.141	1539	-0.6049	8866	0.8752	9254	0.8577	68	0.0009	12	-0.2049	5138	0.4853	5102	-0.5408	8298	0.8178	8658	0.6227	1608	0.1226	1302
DFFA	0.7724	318	0.0304	362	0.4148	4177	0.3951	4228	0.3272	4834	0.4644	4922	0.6916	808	0.08	865	0.7134	768	0.068	812	0.374	3977	0.3809	4073	0.5833	1835	0.1777	1953	-0.7115	9938	0.9306	9878	0.5294	2637	0.2591	2731
TRMT1	0.7722	319	0.0134	159	-0.9005	10553	0.9952	10608	0.7772	334	0.0138	175	0.4406	3429	0.2967	3148	0.6442	1410	0.0905	1056	0.5518	2010	0.1486	1653	0.3296	4523	0.4186	4385	0.3317	5008	0.4608	4921	0.7498	526	0.0274	331
SOCS6	0.7719	320	0.0135	161	0.9458	48	0.0012	23	-0.3408	6054	0.5843	6171	0.74	476	0.0244	276	-0.5031	7749	0.7681	8076	0.4312	3272	0.2786	2977	0.3299	4522	0.4184	4379	0.3067	5213	0.4817	5142	0.7741	401	0.0185	232
CCBL1	0.7717	321	0.0591	654	0.7324	1010	0.1407	1510	-0.9158	10653	0.9956	10597	0.4923	2848	0.3301	3507	0.6926	957	0.1352	1561	0.6378	1195	0.1769	1947	-0.5057	7716	0.6503	6888	-0.5819	8707	0.7451	7875	0.2987	4940	0.4774	5092
PRKAG2	0.7707	322	0.0137	163	-0.465	7054	0.6832	7255	0.785	293	0.0116	150	-0.5714	8559	0.8446	8939	0.4826	3048	0.2523	2724	0.6509	1069	0.0691	773	0.4215	3485	0.3093	3233	0.6775	1156	0.0755	838	0.342	4581	0.4197	4429
FOXA1	0.7707	323	0.0138	166	-0.5997	8354	0.8134	8631	0.6907	950	0.0545	648	0.6453	1202	0.0848	902	0.657	1280	0.0782	934	0.3291	4421	0.401	4265	0.7063	770	0.0402	495	0.3512	4838	0.4418	4708	0.3953	4085	0.3649	3879
GNG13	0.7706	324	0.1324	1473	0.722	1105	0.2138	2252	-0.3623	6258	0.5239	5525	0.4311	3550	0.4367	4621	-0.4553	7221	0.5649	5980	0.835	103	0.0693	776	0.4351	3330	0.4275	4478	-0.7942	10415	0.8912	9461	-0.4399	6938	0.5569	5954
ATP5F1	0.7705	325	0.0311	366	0.2523	5273	0.5028	5317	-0.4353	7065	0.6619	6969	0.6249	1407	0.1408	1536	0.302	4905	0.4727	4995	0.5829	1702	0.1667	1843	0.7081	763	0.0672	819	0.4949	3237	0.31	3339	0.5624	2296	0.2247	2401
AGPAT3	0.7704	326	0.0312	369	-0.6225	8579	0.8028	8521	0.5926	1954	0.1859	2042	0.5157	2624	0.2531	2706	0.7839	323	0.0276	322	0.4933	2554	0.2496	2660	0.8567	77	0.0064	89	0.4432	3801	0.3624	3905	0.2864	5022	0.4775	5093
CNDP2	0.7696	327	0.0141	169	0.6281	2042	0.1664	1790	0.7356	582	0.029	344	-0.4295	6951	0.6814	7249	0.4066	3897	0.3454	3717	0.3038	4655	0.4235	4517	0.7499	466	0.0193	253	0.6196	1773	0.1311	1429	-0.3225	5729	0.5465	5814
TXK	0.7694	328	0.0141	168	0.4108	4205	0.3798	4061	0.329	4821	0.4435	4709	0.3921	4005	0.3562	3792	0.353	4481	0.4072	4318	0.7336	487	0.0233	277	0.6578	1170	0.071	853	0.2738	5414	0.5042	5380	-0.2483	5323	0.5001	5327
ARL4D	0.7691	329	0.0315	373	-0.5432	7807	0.7257	7719	0.5132	2779	0.2715	2880	0.656	1114	0.1124	1194	0.4696	3190	0.3057	3303	0.8892	32	0.0018	21	0.5261	2380	0.2334	2504	0.4997	3181	0.3056	3271	0.2695	5106	0.4859	5169
MMP23B	0.7687	330	0.1345	1502	-0.4385	6788	0.554	5849	0.6956	909	0.221	2383	0.8157	171	0.09	949	-0.4566	7242	0.566	5988	0.6143	1436	0.2886	3097	0.5876	1788	0.3176	3326	0.8392	128	0.0759	842	0.4312	3688	0.4424	4701
OPN1LW	0.7683	331	0.032	375	0.6855	1469	0.1432	1538	0.4954	2977	0.2916	3071	0.4042	3864	0.3725	3963	0.7906	300	0.0248	303	0.7415	443	0.0426	489	0.5616	2038	0.1993	2156	-0.5441	8340	0.7759	8198	0.2482	5180	0.4929	5243
AFM	0.7675	332	0.0324	380	-0.6487	8858	0.8286	8772	-0.4772	7541	0.704	7416	-0.2923	5551	0.5234	5548	0.5106	2768	0.2639	2850	0.5919	1613	0.1567	1734	0.5812	1860	0.1795	1966	0.5629	2434	0.2357	2564	0.7885	339	0.0311	365
NUMB	0.7674	333	0.0141	170	0.5406	2972	0.2544	2739	-0.7699	10312	0.984	10466	0.73	533	0.0293	342	0.5743	2101	0.155	1737	0.6482	1097	0.0711	806	0.5919	1756	0.1264	1423	0.4037	4250	0.3825	4100	0.633	1512	0.113	1192
TAF1	0.7672	334	0.0615	687	-0.5918	8281	0.72	7667	0.7425	532	0.0895	1060	0.4365	3476	0.38	4045	-0.4089	6673	0.5798	6120	-0.4806	7315	0.62	6571	0.5984	1699	0.2291	2456	0.3649	4695	0.4613	4931	-0.6571	9264	0.8062	8561
PTPRG	0.7671	335	0.0142	172	0.6018	2307	0.192	2053	0.579	2091	0.1556	1724	0.3447	4521	0.413	4387	0.4475	3445	0.295	3176	0.5924	1610	0.1153	1272	0.5018	2629	0.2149	2315	-0.5884	8783	0.8641	9173	-0.5951	8625	0.8429	8940
HMGB1	0.7663	336	0.1374	1536	0.8201	419	0.1129	1200	-0.401	6669	0.5428	5739	0.5654	2074	0.3437	3650	0.8558	88	0.0581	682	0.8659	55	0.0478	537	0.7858	276	0.1169	1320	-0.7849	10375	0.882	9360	0.7002	875	0.2205	2369
SLIT3	0.7661	337	0.0331	382	0.95	40	0.0014	27	-0.2277	5398	0.5154	5428	0.7581	380	0.0397	429	-0.5027	7744	0.7206	7612	0.8195	139	0.012	145	0.6927	872	0.0776	928	0.3898	4399	0.4248	4543	0.5301	2624	0.2585	2725
ST8SIA1	0.766	338	0.0143	174	0.7388	964	0.0716	753	-0.4438	7166	0.7077	7457	-0.3746	6286	0.6076	6458	0.5634	2211	0.163	1836	0.6941	710	0.0419	477	0.7502	464	0.0192	251	-0.5427	8325	0.8197	8687	0.6607	1243	0.0875	934
ARAF	0.766	339	0.0331	383	0.2942	5125	0.4873	5182	-0.3259	5925	0.5575	5894	0.6997	749	0.0749	815	-0.5219	7954	0.7419	7830	0.4421	3142	0.3037	3285	0.6526	1205	0.1117	1265	0.766	455	0.0433	483	0.4602	3381	0.3246	3467
GNB1L	0.766	340	0.0331	385	0.7797	651	0.0669	706	0.7532	472	0.0446	534	0.4719	3068	0.2976	3156	-0.2853	5516	0.521	5511	-0.5129	7669	0.7175	7567	0.7766	323	0.0289	364	0.3168	5138	0.488	5220	-0.6665	9365	0.8734	9283
CUTC	0.7657	341	0.0634	699	0.556	2802	0.3136	3359	-0.6834	9737	0.8509	8977	0.8029	216	0.0426	452	-0.7476	10173	0.9119	9652	0.9031	20	0.0047	55	-0.5357	8067	0.6819	7211	0.7205	768	0.121	1329	0.7914	322	0.0584	660
SOX12	0.7655	342	0.1384	1554	-0.6674	9054	0.7338	7820	0.7186	716	0.1955	2127	0.9541	4	0.0059	70	-0.3519	6054	0.5142	5439	0.3846	3860	0.4516	4809	0.5	2649	0.3796	3977	0.453	3697	0.4378	4669	0.5306	2620	0.3807	4032
RNF44	0.7651	343	0.1388	1558	0.765	761	0.1685	1817	0.9574	8	0.0049	70	0.5519	2204	0.3549	3777	-0.7009	9830	0.7858	8260	-0.4021	6363	0.5231	5575	-0.4457	7034	0.5493	5779	-0.5959	8872	0.6776	7194	0.9594	8	0.0059	56
GPS1	0.7649	344	0.0146	176	0.7352	989	0.075	786	0.641	1459	0.0963	1119	0.5353	2383	0.1862	2039	0.8752	62	0.0008	23	0.4049	3610	0.3099	3334	0.7359	546	0.0254	314	0.443	3804	0.335	3605	0.6865	996	0.0663	726
TRIM27	0.7646	345	0.0641	705	-0.6855	9214	0.8164	8665	0.7552	459	0.078	923	-0.7593	10272	0.9241	9783	-0.511	7832	0.6655	7036	0.5022	2462	0.3013	3252	0.4245	3451	0.3827	4014	0.3086	5204	0.4912	5273	0.9226	16	0.0041	38
BMP15	0.7646	346	0.0337	388	0.7522	854	0.0865	904	0.6847	1007	0.0919	1085	0.5837	1884	0.1829	2008	0.7005	883	0.0769	910	-0.3092	5421	0.5104	5439	0.5536	2092	0.2073	2231	0.4136	4139	0.3978	4234	0.4202	3815	0.3642	3875
HESX1	0.7642	347	0.0338	391	0.9502	39	0.0014	28	0.3622	4503	0.4351	4628	0.6554	1120	0.113	1201	-0.4644	7324	0.6804	7187	0.5674	1849	0.1805	1984	0.5599	2044	0.2011	2169	0.6649	1281	0.1229	1350	-0.5556	8176	0.7589	8088
ROM1	0.7641	348	0.0643	710	0.4985	3373	0.3546	3801	-0.5533	8369	0.7162	7539	0.461	3198	0.3567	3798	0.5399	2447	0.2956	3185	0.6223	1365	0.1932	2105	0.7558	429	0.072	866	0.6144	1831	0.2423	2633	-0.2915	5517	0.503	5361
DRP2	0.764	349	0.0146	175	-0.4772	7186	0.6952	7393	0.6832	1029	0.0595	704	0.4764	3024	0.2532	2707	0.4314	3651	0.3155	3414	0.8224	133	0.0032	38	0.5345	2280	0.1808	1978	-0.4165	6998	0.683	7248	0.3946	4090	0.3658	3892
HOXA9	0.764	350	0.0645	715	-0.4736	7151	0.6207	6627	0.4374	3626	0.3928	4195	0.5605	2121	0.2734	2887	-0.4741	7436	0.634	6709	0.5812	1726	0.2367	2525	0.7334	559	0.0909	1061	0.3461	4868	0.4724	5053	-0.6044	8709	0.7481	7993
USP2	0.764	351	0.0338	390	-0.516	7555	0.6993	7438	0.7064	807	0.0739	864	0.59	1815	0.1778	1941	0.4578	3314	0.3208	3482	0.3814	3899	0.3723	3999	0.6388	1330	0.1243	1401	-0.5487	8395	0.7804	8239	-0.3079	5632	0.5253	5599
MCTS1	0.7636	352	0.0339	392	-0.6346	8704	0.8141	8638	0.329	4822	0.4624	4893	0.7701	329	0.0323	372	0.763	415	0.0389	442	0.7218	554	0.0524	592	0.3289	4530	0.4405	4633	-0.5986	8906	0.8336	8845	0.7243	693	0.07	761
ZNF649	0.7635	353	0.0651	730	0.6563	1744	0.217	2286	-0.3502	6149	0.5448	5755	0.3493	4480	0.4514	4749	0.3792	4182	0.4329	4593	-0.5298	7882	0.6697	7074	0.266	4984	0.4824	5076	-0.7077	9901	0.8741	9276	0.789	337	0.0598	668
MRGPRX3	0.7634	354	0.0651	731	-0.444	6843	0.5989	6372	0.6102	1780	0.2329	2488	0.909	23	0.0044	51	0.5844	1994	0.2568	2770	-0.8033	10443	0.9579	10170	0.518	2455	0.2994	3138	0.2337	5531	0.5086	5431	-0.3975	6471	0.5673	6045
RYR2	0.7633	355	0.0149	178	0.7359	983	0.0744	780	0.5628	2277	0.1708	1886	0.4128	3768	0.3303	3510	0.7078	810	0.0427	486	0.628	1305	0.0867	978	0.7222	649	0.0319	403	-0.3992	6800	0.6622	7029	0.3706	4328	0.3911	4155
TOM1	0.7631	356	0.0342	394	-0.682	9185	0.8583	9098	-0.6027	8886	0.8365	8809	0.6445	1212	0.1239	1321	0.6381	1466	0.1328	1530	0.6934	717	0.0699	783	0.8264	146	0.0118	161	-0.7667	10301	0.9646	10258	0.503	2925	0.2841	3017
MZF1	0.7622	357	0.0346	397	0.8549	258	0.0246	277	-0.444	7170	0.67	7058	-0.4732	7446	0.6905	7339	0.7209	708	0.0625	742	0.469	2821	0.2764	2960	0.6421	1295	0.1219	1368	-0.459	7431	0.6913	7340	0.6238	1596	0.1597	1694
FOXRED1	0.7622	358	0.0346	398	-0.8081	10165	0.9565	10186	0.5523	2386	0.2295	2457	0.5425	2309	0.2257	2417	0.6277	1567	0.1434	1627	0.7108	611	0.0588	666	0.3608	4211	0.4108	4285	0.7273	718	0.0689	769	-0.4966	7575	0.6971	7449
NR2C2AP	0.7616	359	0.0659	747	0.5991	2341	0.2759	2968	0.7644	402	0.0711	836	0.6072	1603	0.2275	2435	-0.5446	8176	0.6988	7393	0.4288	3305	0.3671	3937	0.8937	28	0.0069	93	0.7826	353	0.0643	717	0.4684	3302	0.3627	3853
IMPAD1	0.7615	360	0.0349	402	0.5441	2934	0.2796	2995	0.4214	3818	0.3679	3919	-0.5808	8661	0.8084	8529	0.8224	182	0.0136	185	0.3471	4250	0.4102	4378	0.6931	866	0.0769	921	0.5994	2001	0.1946	2134	0.5143	2797	0.2731	2885
NUDT2	0.7614	361	0.1421	1596	0.773	701	0.1601	1733	0.7187	713	0.1954	2125	-0.4208	6841	0.5427	5751	-0.6024	8843	0.6786	7158	0.5228	2289	0.3623	3898	0.4602	3056	0.4101	4269	0.5231	2919	0.3947	4207	-0.4618	7195	0.5703	6089
CD6	0.7613	362	0.0153	180	0.6954	1373	0.1064	1134	0.4929	3011	0.2509	2689	0.7111	666	0.0391	421	0.4644	3236	0.2747	2946	0.6192	1396	0.0942	1060	0.441	3261	0.2845	2984	-0.4026	6844	0.6662	7078	0.7053	839	0.0512	577
HMSD	0.7609	363	0.0155	185	0.6419	1899	0.1536	1655	0.5346	2571	0.2026	2210	0.7158	636	0.0371	405	0.5272	2581	0.2024	2245	0.8602	63	0.0009	11	0.5465	2164	0.1658	1845	-0.7563	10229	0.9789	10431	0.2098	5245	0.4896	5207
FFAR2	0.7605	364	0.0352	406	-0.5913	8275	0.7712	8207	-0.3315	5983	0.5617	5945	0.6462	1199	0.122	1299	0.5182	2680	0.2568	2773	0.8028	174	0.0168	199	0.5316	2316	0.2277	2442	0.4018	4266	0.4114	4391	-0.5748	8400	0.7795	8308
ENPEP	0.7604	365	0.0352	405	0.6478	1833	0.1779	1918	0.6907	951	0.0854	1012	0.6347	1290	0.1325	1432	0.8449	110	0.0088	124	0.6614	976	0.0962	1083	0.5458	2168	0.2132	2296	-0.4326	7145	0.6652	7061	0.6415	1417	0.1429	1525
SULF1	0.7602	366	0.0355	407	-0.3426	5914	0.5551	5874	0.7726	365	0.0333	408	0.7584	379	0.0395	428	0.5582	2255	0.2156	2369	-0.6479	9296	0.8738	9245	0.4693	2970	0.2911	3053	-0.2644	5696	0.5361	5706	0.2252	5229	0.4961	5290
KIAA2018	0.7599	367	0.0158	186	0.774	695	0.0477	512	-0.7018	9881	0.9537	10164	0.4639	3165	0.2689	2859	0.5744	2099	0.1549	1736	0.2894	4759	0.434	4620	0.5196	2443	0.1956	2120	0.6145	1828	0.1359	1473	0.4052	3967	0.3529	3746
GJB2	0.7598	368	0.0671	758	-0.4736	7152	0.6207	6629	0.6749	1106	0.1549	1717	0.7546	391	0.0742	811	0.6781	1068	0.1493	1698	0.442	3145	0.3545	3806	-0.4315	6867	0.5885	6178	-0.7279	10043	0.8951	9498	-0.3696	6169	0.5456	5805
NTSR1	0.7597	369	0.0358	411	-0.6579	8958	0.8367	8853	-0.3821	6451	0.609	6425	0.4832	2943	0.2873	3040	0.672	1128	0.1017	1176	0.7922	204	0.0207	243	0.7675	369	0.0329	411	-0.3409	6223	0.5815	6201	0.6905	963	0.0945	997
LENG1	0.7597	370	0.0358	410	-0.3683	6117	0.5759	6129	0.6472	1399	0.1269	1457	0.5464	2273	0.2219	2390	0.2472	5213	0.4989	5273	0.3402	4315	0.4167	4451	0.4556	3097	0.3035	3180	0.6688	1241	0.1199	1317	0.6838	1021	0.1019	1063
KRT15	0.7594	371	0.0673	762	0.4974	3386	0.3552	3807	0.5054	2858	0.3369	3587	0.6518	1147	0.1747	1910	0.6735	1119	0.1541	1733	0.8325	106	0.0254	295	-0.5775	8582	0.7294	7713	-0.3505	6312	0.5513	5874	0.4275	3739	0.3956	4210
CYP27B1	0.7592	372	0.0676	767	0.567	2684	0.3049	3275	0.8974	39	0.0062	87	0.555	2176	0.2784	2946	0.3688	4311	0.4397	4652	0.7258	533	0.0919	1031	0.3064	4717	0.4682	4921	-0.6198	9123	0.7861	8306	-0.4766	7365	0.6314	6760
C10orf10	0.7591	373	0.0361	415	0.5124	3247	0.307	3293	0.7324	608	0.0563	672	0.5518	2208	0.2167	2341	0.6664	1189	0.107	1257	0.5848	1675	0.1647	1817	0.7389	522	0.0477	566	0.6728	1195	0.115	1271	0.4559	3425	0.3285	3516
PTGFR	0.759	374	0.0163	189	0.6081	2245	0.1853	1995	0.4601	3355	0.2914	3065	-0.5495	8283	0.8197	8682	-0.5216	7950	0.7885	8299	0.6142	1437	0.0986	1103	0.6372	1347	0.0885	1041	-0.7501	10188	0.9769	10402	-0.7294	9924	0.9553	10160
C3AR1	0.7587	375	0.0362	416	0.276	5200	0.4952	5255	-0.4036	6699	0.6302	6649	-0.4269	6922	0.643	6844	0.6465	1390	0.1262	1465	0.6035	1517	0.1458	1623	0.7379	528	0.0481	576	0.5805	2216	0.2156	2342	0.488	3073	0.2982	3160
SRSF2	0.7586	376	0.0005	14	-0.4494	6886	0.7608	8099	0.652	1346	0.0118	155	0.2849	5004	0.4032	4287	0.2439	5222	0.4605	4874	0.6506	1072	0.0073	84	0.8398	110	-0.0001	1	0.4392	3860	0.2046	2251	0.6963	916	0.0062	59
SRC	0.7581	377	0.0365	420	0.491	3452	0.3254	3500	-0.5946	8792	0.8285	8727	-0.2668	5397	0.5117	5413	0.5498	2344	0.2242	2453	0.6781	830	0.0813	910	0.685	954	0.0839	992	0.3632	4716	0.4507	4810	0.6034	1821	0.1813	1958
GAB1	0.7577	378	0.0165	191	0.5019	3340	0.2901	3112	-0.7291	10067	0.9684	10289	-0.5617	8445	0.8322	8807	-0.358	6120	0.5909	6262	0.7341	484	0.0228	269	0.7439	499	0.0219	281	0.5673	2374	0.184	2012	0.3747	4300	0.387	4115
PRIM2	0.7577	379	0.1453	1638	0.9292	70	0.0267	305	0.3978	4118	0.4627	4898	-0.498	7717	0.5843	6181	-0.9055	10645	0.9728	10349	-0.4128	6498	0.5279	5617	0.7107	752	0.199	2154	-0.4722	7593	0.5845	6236	0.9837	1	0.0004	6
DNAJA2	0.7573	380	0.0167	193	0.6567	1739	0.1408	1511	0.7134	750	0.0395	476	0.5305	2438	0.1917	2091	-0.6682	9522	0.9337	9898	0.5157	2347	0.1832	2004	0.4056	3695	0.3286	3432	0.5785	2243	0.1716	1880	0.6981	897	0.0552	624
CDH4	0.7572	381	0.0368	421	0.5956	2379	0.231	2472	-0.33	5969	0.5604	5927	-0.4699	7404	0.6869	7307	0.7049	839	0.0742	882	0.4673	2841	0.2792	2983	0.7283	604	0.0538	654	-0.4014	6825	0.6361	6784	0.5914	1948	0.1939	2099
RABGEF1	0.7568	382	0.0167	194	-0.4308	6721	0.6486	6903	0.4676	3263	0.2826	2981	0.3656	4295	0.3871	4123	0.6102	1743	0.12	1393	0.4224	3393	0.2885	3095	-0.3041	5499	0.5287	5565	0.3421	4910	0.4502	4804	0.3541	4480	0.4071	4316
ADH1C	0.7566	383	0.0372	425	0.7725	705	0.0719	756	0.675	1105	0.1015	1176	0.6302	1335	0.1355	1476	0.7249	677	0.0604	718	0.7305	502	0.048	540	0.7028	796	0.0704	845	-0.6722	9622	0.9009	9555	-0.3897	6384	0.5956	6355
DIRC2	0.7565	384	0.0372	424	-0.3501	5984	0.5613	5968	-0.369	6327	0.5979	6321	0.7421	468	0.0479	498	0.6678	1174	0.1051	1232	0.7193	578	0.0539	622	0.5689	1974	0.1913	2083	-0.5824	8716	0.8161	8636	-0.5536	8155	0.7573	8070
CCT5	0.7563	385	0.0169	197	0.448	3845	0.3425	3690	0.7184	718	0.0377	452	0.5032	2745	0.2245	2410	0.7101	790	0.0409	476	0.6447	1126	0.0737	837	0.7796	313	0.0117	160	-0.5531	8446	0.8297	8815	-0.501	7617	0.7411	7917
SH2B3	0.7558	386	0.0375	430	-0.8608	10441	0.9784	10421	-0.7767	10340	0.9713	10319	-0.5439	8209	0.7683	8106	0.5371	2480	0.2372	2577	-0.3712	6010	0.5629	5978	0.7251	624	0.056	678	-0.6	8924	0.8355	8867	0.7728	409	0.0395	455
AQP8	0.7553	387	0.0379	432	0.6911	1415	0.137	1475	-0.3428	6075	0.5729	6057	0.78	287	0.0279	320	0.8315	153	0.0112	158	0.3803	3917	0.3733	4009	0.619	1505	0.1429	1626	-0.3455	6264	0.5851	6241	0.5553	2376	0.2312	2464
ABCC6	0.7551	388	0.0379	435	0.8752	194	0.0186	221	-0.6667	9591	0.8961	9486	0.3796	4138	0.402	4275	-0.4342	6971	0.6499	6880	0.7144	595	0.0571	652	0.4106	3619	0.3556	3712	0.6316	1651	0.1586	1741	-0.476	7354	0.6771	7252
VCPIP1	0.7545	389	0.0381	439	0.4878	3483	0.328	3530	0.4839	3101	0.3028	3204	0.6142	1531	0.1527	1680	0.6245	1607	0.1463	1662	0.6916	736	0.0718	812	0.5777	1898	0.183	2004	-0.7777	10343	0.9714	10331	-0.251	5332	0.5033	5364
PNMA1	0.7544	390	0.0172	199	0.865	222	0.0116	142	0.5697	2203	0.1638	1821	0.4362	3481	0.3021	3214	0.8282	161	0.0038	61	0.4117	3527	0.3008	3245	0.7599	413	0.0166	220	-0.5997	8917	0.876	9298	0.5986	1879	0.1463	1562
ATP5J	0.7541	391	0.0382	440	-0.2561	5410	0.5145	5427	0.868	80	0.0052	75	0.4706	3084	0.2987	3170	0.5397	2450	0.2345	2543	0.6714	902	0.087	979	0.4922	2737	0.2666	2809	-0.6429	9333	0.8737	9271	0.3377	4625	0.4438	4714
DCP1B	0.7539	392	0.0174	201	0.7511	863	0.0619	658	-0.2863	5626	0.54	5706	-0.3635	6170	0.5956	6320	0.3751	4242	0.3821	4072	0.5379	2150	0.1617	1788	0.3294	4524	0.4187	4388	0.3985	4303	0.3889	4157	-0.424	6777	0.6514	6980
NDUFB7	0.7539	393	0.0717	805	-0.6805	9171	0.8117	8611	0.7825	308	0.0564	673	0.6677	1012	0.1568	1720	0.5752	2093	0.2646	2859	0.5777	1764	0.2396	2558	0.7697	360	0.0626	762	-0.3952	6752	0.5854	6245	0.5304	2622	0.3147	3355
RP9	0.7536	394	0.0717	806	0.716	1170	0.1573	1702	0.7649	396	0.0708	828	-0.3517	6040	0.5335	5653	-0.561	8349	0.7155	7554	0.5124	2381	0.2929	3144	0.7743	330	0.0587	709	0.3516	4832	0.4695	5021	0.5772	2096	0.2718	2865
CXADR	0.7535	395	0.1505	1708	0.925	79	0.0285	323	0.9759	2	0.0009	23	-0.6362	9262	0.7143	7573	-0.5797	8573	0.6549	6925	0.4368	3195	0.421	4491	0.7914	255	0.1111	1257	0.6686	1243	0.2602	2834	0.4758	3202	0.4155	4396
PHACTR2	0.7529	396	0.0178	206	-0.7728	9963	0.9529	10144	0.5822	2052	0.152	1685	0.5846	1877	0.1383	1505	0.6718	1133	0.0683	816	0.3833	3877	0.337	3629	0.7159	704	0.0353	437	0.2177	5560	0.5217	5563	0.7944	307	0.0127	149
CYB5A	0.7528	397	0.0178	205	-0.5393	7773	0.7525	8009	-0.5757	8606	0.8497	8958	0.4923	2849	0.2364	2533	0.5694	2156	0.1584	1781	0.8066	166	0.0048	57	0.5533	2096	0.1595	1783	0.3721	4607	0.4182	4477	-0.4172	6687	0.643	6878
MTMR10	0.7525	398	0.0727	811	0.5872	2471	0.287	3087	0.231	5324	0.5014	5296	0.8939	34	0.0072	90	0.5528	2314	0.2849	3061	0.6227	1357	0.1929	2099	-0.4254	6786	0.5836	6135	0.5207	2953	0.3357	3614	0.7005	874	0.1356	1441
ITGA9	0.7525	399	0.0181	211	-0.4184	6610	0.6351	6767	0.6618	1251	0.0783	929	0.2794	5051	0.4669	4958	0.5676	2175	0.1596	1795	0.8314	109	0.0023	29	0.6516	1215	0.0755	902	0.3216	5096	0.4688	5005	0.7082	816	0.0499	565
PLCD1	0.7524	400	0.0389	446	0.8195	425	0.0416	462	0.33	4814	0.4616	4881	0.5009	2772	0.2675	2844	-0.73	10053	0.9425	10016	0.5235	2280	0.2225	2381	-0.4112	6609	0.6174	6507	0.3134	5172	0.49	5257	0.544	2497	0.2441	2603
WFDC10A	0.7522	401	0.0731	816	0.4967	3393	0.3558	3813	-0.4148	6826	0.5949	6291	-0.7676	10306	0.9312	9860	0.7452	507	0.086	1016	0.6501	1076	0.1625	1799	-0.6008	8856	0.7577	8009	-0.438	7215	0.6195	6613	0.8159	214	0.0411	475
FRMD1	0.7522	402	0.1526	1730	0.8409	317	0.0937	986	-0.7963	10431	0.894	9453	0.8626	69	0.0531	552	0.626	1589	0.2923	3148	0.9503	5	0.0068	79	0.8121	183	0.0921	1076	0.7154	810	0.2077	2282	0.6904	965	0.2299	2448
PLD1	0.7521	403	0.0731	814	0.7901	595	0.0866	907	0.812	202	0.0383	460	-0.3622	6155	0.5407	5730	0.8026	246	0.0437	496	0.3604	4122	0.4266	4553	0.8672	64	0.0135	183	0.3567	4787	0.4669	4988	0.8062	251	0.0474	540
SUCLA2	0.7516	404	0.0183	212	0.6759	1566	0.1236	1340	0.6314	1567	0.1048	1217	0.5253	2512	0.1985	2161	-0.3519	6053	0.585	6186	0.3173	4541	0.4122	4415	0.8466	99	0.0016	38	0.6622	1308	0.0897	990	0.586	2004	0.1573	1665
CST3	0.7515	405	0.0733	817	0.6836	1491	0.1895	2031	0.5553	2351	0.2906	3055	0.6335	1300	0.1974	2152	0.5297	2551	0.306	3310	0.7002	673	0.1146	1260	-0.5858	8687	0.7388	7825	0.3195	5117	0.4875	5218	0.8024	269	0.0497	563
ST8SIA2	0.7515	406	0.0183	213	0.6879	1443	0.1126	1198	0.4243	3784	0.3328	3547	0.7155	643	0.0373	407	0.6853	1011	0.0563	664	0.6447	1125	0.0736	835	0.4726	2932	0.2486	2645	-0.467	7530	0.7438	7861	0.7815	369	0.0162	200
TUBG1	0.7514	407	0.0735	822	-0.6834	9201	0.8147	8649	0.7642	404	0.0712	840	-0.6497	9397	0.8157	8619	0.5621	2222	0.2766	2965	0.3224	4489	0.4513	4805	0.828	145	0.0295	371	-0.6447	9351	0.8104	8569	0.6345	1491	0.2115	2264
AVPR1B	0.7512	408	0.0737	827	-0.5901	8265	0.7173	7633	0.677	1087	0.153	1698	0.7175	624	0.1071	1115	0.4986	2877	0.3307	3578	0.7998	181	0.0401	456	0.815	174	0.0358	445	-0.3228	6074	0.5343	5689	0.5657	2255	0.2825	2991
EDNRB	0.751	409	0.0399	459	0.5409	2969	0.2819	3027	0.6318	1565	0.1425	1612	0.5557	2170	0.2122	2297	0.5152	2713	0.2598	2799	-0.3593	5877	0.549	5827	0.3431	4377	0.4274	4477	0.7288	705	0.0679	758	0.41	3915	0.3765	3996
SRPR	0.7508	410	0.0399	460	0.6316	2005	0.1939	2074	0.6951	913	0.0811	965	0.6041	1636	0.1643	1800	0.425	3731	0.3537	3813	0.4912	2578	0.2522	2696	0.7339	556	0.0508	611	0.5943	2065	0.2008	2201	0.4533	3448	0.3316	3548
SLC15A1	0.7507	411	0.0399	458	0.7761	680	0.0697	734	0.4862	3064	0.3004	3166	0.8994	28	0.0015	22	-0.4204	6796	0.6358	6736	0.3932	3750	0.359	3856	0.4218	3479	0.3433	3581	-0.5587	8489	0.7913	8353	-0.3616	6092	0.5679	6058
YME1L1	0.7507	412	0.0399	457	0.7515	859	0.087	912	-0.2259	5396	0.515	5424	0.6617	1066	0.1071	1116	0.5002	2859	0.2759	2958	-0.6834	9653	0.9085	9601	0.5341	2284	0.225	2414	-0.4652	7506	0.6978	7408	0.3639	4400	0.4236	4491
ACSL6	0.7505	413	0.0185	214	-0.5881	8242	0.8026	8518	0.5194	2725	0.2211	2388	0.7994	226	0.0076	98	0.5474	2366	0.1788	2007	-0.7147	9917	0.9629	10236	-0.4259	6792	0.6679	7083	0.7437	587	0.0307	341	0.3705	4329	0.3914	4157
IFI27	0.7505	414	0.04	461	0.6107	2214	0.2164	2276	0.4942	2995	0.2922	3088	0.8595	75	0.0061	72	0.7268	649	0.059	697	0.3014	4676	0.4468	4758	0.3316	4497	0.4375	4595	0.4683	3523	0.3368	3624	0.4395	3593	0.3468	3668
PGLYRP2	0.7504	415	0.1535	1741	-0.6749	9116	0.7416	7893	0.729	630	0.1844	2027	0.5714	2018	0.3367	3570	0.7312	607	0.1824	2039	0.558	1948	0.3365	3623	0.8707	54	0.0477	565	-0.8352	10551	0.9274	9842	0.7272	675	0.1909	2066
AXL	0.7504	416	0.0186	215	-0.7634	9896	0.9477	10092	-0.5336	8167	0.8086	8537	0.3881	4045	0.3606	3849	-0.3967	6549	0.6368	6748	0.4642	2885	0.2401	2568	0.667	1101	0.0651	796	0.371	4619	0.4191	4489	0.7166	762	0.0444	514
ZKSCAN4	0.7504	417	0.0743	835	-0.4947	7342	0.6337	6751	0.6528	1338	0.1819	1998	-0.5696	8541	0.7261	7708	0.9398	12	0.002	40	0.3318	4390	0.4449	4739	0.6143	1548	0.2127	2285	-0.2441	5629	0.5106	5445	-0.6754	9439	0.8251	8750
NXF5	0.7501	418	0.0745	838	-0.457	6983	0.609	6475	0.4948	2986	0.3442	3665	0.3447	4520	0.4544	4808	0.569	2160	0.2708	2905	0.7195	574	0.0972	1089	0.5074	2567	0.3069	3202	-0.473	7604	0.6494	6891	0.5923	1941	0.2573	2720
HARS2	0.7501	419	0.0188	217	-0.6201	8551	0.8365	8848	0.5151	2768	0.2263	2426	0.6497	1163	0.0808	870	0.5959	1884	0.1331	1535	0.4982	2504	0.2027	2197	0.7766	322	0.0122	165	-0.3135	5992	0.5735	6112	0.7823	367	0.0159	197
RWDD2A	0.7501	420	0.0188	216	0.4974	3385	0.2935	3150	-0.4571	7314	0.7247	7631	0.6277	1363	0.1014	1048	0.6417	1436	0.0923	1079	-0.4625	7096	0.701	7395	0.5007	2640	0.2164	2329	-0.697	9818	0.9516	10129	0.5837	2032	0.16	1701
CST5	0.7496	421	0.154	1758	-0.7487	9777	0.8205	8701	0.7823	309	0.1256	1444	0.7046	710	0.2076	2255	0.8649	75	0.0525	621	0.9583	4	0.0042	47	-0.7689	10273	0.8693	9209	-0.8354	10553	0.9275	9843	-0.6309	8986	0.7051	7542
MAN2B2	0.7496	422	0.0404	467	-0.9667	10662	0.9991	10661	0.6841	1016	0.0929	1100	0.4866	2903	0.2845	3008	0.6147	1690	0.158	1774	0.4281	3316	0.3219	3454	0.5295	2337	0.2298	2461	0.432	3946	0.3761	4054	-0.4449	6998	0.6464	6921
LTBP4	0.7491	423	0.0755	842	-0.7673	9924	0.8917	9456	-0.2944	5677	0.514	5413	0.6862	850	0.1374	1495	0.6205	1639	0.2168	2386	0.6727	888	0.14	1558	0.7163	701	0.1071	1218	-0.7235	10011	0.8899	9447	-0.3455	5936	0.5294	5643
TOP3B	0.749	424	0.0191	218	0.7823	636	0.0419	465	0.4013	4066	0.3639	3871	-0.7056	9898	0.9589	10191	0.7106	784	0.0408	474	0.7256	534	0.0267	308	-0.2877	5407	0.5167	5441	0.5641	2422	0.1885	2068	0.4982	2974	0.2487	2644
SLA2	0.7488	425	0.0191	220	0.2924	5130	0.4751	5063	0.5313	2601	0.2063	2249	0.6518	1146	0.0793	855	0.612	1709	0.118	1373	0.8487	82	0.0013	17	0.595	1733	0.1236	1388	0.5765	2276	0.1736	1908	-0.2813	5459	0.5167	5517
HES4	0.7486	426	0.041	470	0.6163	2162	0.2102	2215	0.7842	300	0.0278	328	0.6652	1032	0.1047	1088	0.7737	356	0.0323	373	0.7233	545	0.0513	573	0.644	1281	0.1199	1351	-0.6938	9797	0.9176	9738	-0.5632	8268	0.7674	8179
URM1	0.7485	427	0.0194	226	0.5129	3241	0.2801	2999	-0.5959	8814	0.8708	9194	0.6281	1357	0.1013	1046	0.6484	1368	0.0857	1014	0.7688	294	0.0119	142	0.7914	254	0.0086	123	-0.6639	9543	0.9315	9887	-0.3317	5817	0.554	5916
PKD2L1	0.7483	428	0.0194	224	-0.62	8549	0.8365	8846	0.4948	2985	0.2489	2661	0.598	1716	0.1266	1354	0.5234	2625	0.2065	2292	0.7027	651	0.0371	435	0.5703	1964	0.1451	1652	-0.4531	7376	0.7281	7722	0.6223	1614	0.123	1307
GTPBP6	0.7479	429	0.0197	230	0.4753	3591	0.3155	3386	0.5668	2235	0.1671	1848	-0.3036	5634	0.539	5707	0.7726	361	0.0151	198	0.6138	1441	0.0989	1106	0.4442	3232	0.2809	2944	-0.6521	9429	0.921	9778	0.2738	5081	0.4692	4996
RBKS	0.7479	430	0.0416	477	-0.8686	10460	0.9828	10458	0.5681	2220	0.2115	2294	0.6411	1236	0.1271	1359	0.341	4599	0.443	4688	0.6557	1026	0.1014	1141	-0.5443	8176	0.7626	8060	0.2569	5476	0.5195	5540	0.5106	2850	0.2769	2928
USP5	0.7477	431	0.0759	847	-0.4051	6482	0.571	6071	0.6248	1622	0.2178	2349	-0.4901	7630	0.6458	6874	0.8434	116	0.0244	302	0.7935	198	0.044	500	0.8528	84	0.0185	238	-0.5243	8125	0.6913	7341	-0.6844	9528	0.8335	8853
SART1	0.7475	432	0.0417	479	0.3568	4691	0.4448	4744	0.6654	1218	0.1097	1265	0.5663	2061	0.2019	2199	0.7019	865	0.0762	902	-0.585	8571	0.8019	8456	0.5194	2445	0.2387	2553	-0.414	6971	0.6475	6875	-0.3794	6280	0.5857	6257
HDAC11	0.7473	433	0.0419	480	0.6146	2175	0.2122	2233	0.4283	3746	0.3612	3844	0.5406	2329	0.2276	2439	0.5155	2711	0.2594	2794	0.4956	2532	0.2473	2630	0.6332	1385	0.1292	1447	-0.7453	10160	0.9517	10133	0.4308	3691	0.3541	3753
ZNF208	0.7472	434	0.0422	482	-0.3773	6195	0.584	6215	0.7715	367	0.0343	418	0.5878	1845	0.18	1970	0.5455	2385	0.2286	2491	-0.3423	5697	0.5326	5656	0.7204	661	0.0589	711	-0.3784	6605	0.6151	6562	0.3952	4086	0.3917	4159
DCX	0.7472	435	0.0199	231	0.6667	1648	0.1318	1423	-0.3471	6118	0.5907	6246	0.281	5034	0.4657	4942	0.8942	37	0.0004	12	0.7551	359	0.0154	177	0.5774	1902	0.1387	1574	-0.4178	7013	0.6847	7265	-0.6094	8757	0.8577	9090
LOC100506422	0.7471	436	0.0199	232	0.4787	3567	0.3131	3353	0.4974	2956	0.2466	2630	0.5026	2751	0.2257	2418	-0.3972	6553	0.6376	6757	0.4673	2843	0.2374	2534	0.5866	1799	0.1308	1475	0.7963	282	0.0116	113	0.5861	2003	0.1573	1666
DERA	0.7469	437	0.02	234	0.6766	1560	0.1229	1331	0.7642	403	0.0169	209	-0.3892	6469	0.6283	6678	0.5783	2068	0.1504	1709	-0.4721	7220	0.7133	7518	0.7731	342	0.0133	181	0.6818	1110	0.0728	802	0.684	1018	0.0674	736
ASCL4	0.7468	438	0.077	861	-0.4271	6693	0.5868	6236	0.2691	5210	0.497	5247	0.3006	4895	0.4764	5045	0.7539	455	0.0777	924	0.623	1354	0.1923	2089	0.4787	2854	0.3334	3470	-0.3112	5966	0.528	5630	-0.547	8092	0.6889	7374
NDUFB5	0.7465	439	0.0201	237	0.9209	86	0.0027	43	0.6662	1206	0.0742	870	0.3814	4120	0.3686	3932	-0.5711	8467	0.8412	8843	0.6585	1000	0.064	719	-0.3524	5920	0.5758	6063	0.4974	3202	0.2692	2924	0.3493	4525	0.413	4368
RALGAPA1	0.7462	440	0.0201	236	0.6397	1922	0.1554	1675	0.3539	4590	0.4183	4445	0.7251	573	0.0321	368	-0.6494	9324	0.9185	9727	0.6649	950	0.0603	679	0.6218	1476	0.1018	1164	0.4601	3625	0.3146	3381	-0.4485	7049	0.6813	7289
XYLT1	0.7462	441	0.1575	1803	0.5731	2600	0.3548	3804	0.7845	298	0.1227	1411	-0.6446	9343	0.7244	7686	0.7586	440	0.1495	1701	-0.4276	6683	0.5357	5689	-0.6757	9631	0.7587	8026	-0.4885	7763	0.595	6350	0.8271	167	0.0867	920
PLEC	0.7461	442	0.0201	235	-0.4051	6483	0.6221	6644	0.5624	2281	0.171	1889	0.5194	2585	0.2045	2222	0.7121	777	0.0399	463	0.5701	1829	0.1339	1482	0.6843	963	0.0528	643	-0.7635	10281	0.9816	10460	0.3992	4027	0.3608	3823
CASP5	0.746	443	0.0202	238	0.5557	2810	0.2378	2561	-0.3688	6325	0.6155	6493	0.6406	1243	0.0893	941	0.4809	3066	0.2551	2749	-0.4077	6448	0.6276	6664	0.5092	2546	0.205	2210	0.4671	3534	0.3059	3276	0.3218	4773	0.437	4642
FOXB2	0.7459	444	0.0428	489	-0.4034	6467	0.605	6441	0.7146	740	0.0693	811	0.6315	1325	0.1345	1460	0.4094	3874	0.3711	3971	0.6163	1416	0.1354	1498	0.7991	225	0.0206	272	0.4224	4048	0.3872	4140	-0.3753	6236	0.5811	6210
HIST1H2BD	0.7457	445	0.0779	869	0.7511	862	0.1217	1318	-0.561	8448	0.7242	7622	-0.4234	6868	0.5907	6248	0.8091	229	0.04	464	0.745	422	0.0754	854	0.6852	951	0.1348	1514	-0.4294	7118	0.6112	6531	0.265	5127	0.4882	5187
LEP	0.7453	446	0.0204	239	0.5662	2688	0.2271	2419	-0.5715	8562	0.846	8914	0.8332	129	0.0031	36	0.4553	3357	0.2853	3068	0.6368	1203	0.0804	905	0.7331	561	0.0266	330	-0.4906	7790	0.7682	8118	0.6583	1265	0.0894	956
GPM6B	0.7453	447	0.0432	491	0.7211	1113	0.1104	1179	0.5913	1969	0.1875	2057	0.4521	3299	0.3209	3408	0.7973	270	0.0227	282	0.4902	2589	0.2529	2704	0.6896	907	0.0798	948	0.2875	5339	0.5084	5427	0.3915	4127	0.3961	4215
ITGB6	0.7452	448	0.0432	494	0.6192	2133	0.2075	2190	0.4751	3196	0.3111	3298	0.7272	552	0.0567	596	-0.3432	5973	0.5594	5919	0.7163	586	0.0556	639	0.6144	1547	0.1466	1669	0.4168	4109	0.3951	4211	0.6016	1850	0.1829	1983
ITPKB	0.7452	449	0.0785	874	0.7413	940	0.1314	1419	0.6866	987	0.1413	1597	0.5282	2471	0.3008	3194	0.619	1651	0.2193	2410	0.7476	401	0.0731	828	0.6464	1260	0.1761	1939	0.7787	386	0.0677	753	0.4239	3772	0.3989	4243
USP1	0.7451	450	0.0432	493	0.8264	386	0.0379	425	0.7435	528	0.0505	607	-0.4063	6658	0.6225	6602	0.6034	1812	0.1696	1894	0.776	252	0.027	311	0.2736	4952	0.4783	5031	0.3654	4690	0.4483	4783	0.4232	3787	0.3613	3830
JUND	0.7451	451	0.0786	877	0.7016	1315	0.1711	1856	0.6164	1712	0.2269	2429	0.6787	928	0.146	1595	0.7326	597	0.0966	1126	0.7403	449	0.0789	896	0.393	3855	0.4119	4292	0.3071	5211	0.4918	5276	0.5913	1952	0.2583	2724
TPST1	0.7444	452	0.0208	243	0.5174	3209	0.2758	2964	0.5934	1947	0.1418	1604	0.6798	923	0.0585	620	0.456	3341	0.2841	3045	0.3389	4335	0.3894	4162	0.6365	1353	0.0889	1046	0.4819	3385	0.2886	3108	0.7738	402	0.0186	234
CRYAA	0.7444	453	0.0437	498	0.7575	805	0.0839	870	0.8472	121	0.0081	113	0.4053	3849	0.3706	3946	0.4654	3223	0.3099	3347	0.2609	4899	0.4681	4987	-0.4643	7237	0.6738	7140	-0.5991	8912	0.8343	8850	0.5025	2929	0.2844	3019
PLAU	0.7443	454	0.0208	242	-0.4083	6507	0.6246	6675	0.5807	2070	0.1537	1704	0.5714	2019	0.1519	1663	0.4225	3750	0.3249	3528	-0.3054	5398	0.5102	5435	0.3889	3903	0.3484	3652	0.6799	1129	0.0744	821	0.6036	1817	0.1412	1494
FBXO25	0.7442	455	0.0438	499	0.6495	1814	0.1769	1906	0.6166	1708	0.1608	1787	0.662	1064	0.1069	1113	-0.3604	6153	0.5764	6088	0.4477	3071	0.2987	3219	0.5957	1727	0.1653	1840	-0.3923	6719	0.6275	6694	0.8244	183	0.0172	212
OIT3	0.7441	456	0.0438	500	0.7499	867	0.088	919	0.539	2517	0.2466	2627	0.5692	2037	0.1991	2168	0.5563	2278	0.2177	2395	0.5229	2287	0.223	2390	0.6519	1211	0.1126	1273	0.3731	4596	0.4427	4717	0.7929	310	0.0284	341
FEM1A	0.7437	457	0.0442	505	0.3854	4442	0.4227	4523	0.5878	1999	0.1908	2087	0.6188	1472	0.1478	1614	-0.5902	8686	0.8164	8590	0.6806	814	0.0799	902	0.6663	1106	0.0998	1145	-0.6537	9446	0.8843	9378	-0.4087	6602	0.6139	6534
HOXA2	0.7436	458	0.0442	504	0.3803	4478	0.4261	4549	0.5835	2034	0.1959	2130	0.6325	1316	0.1339	1452	0.4541	3371	0.3245	3520	0.3873	3822	0.3656	3917	0.673	1051	0.0937	1095	-0.4535	7379	0.6855	7282	0.8095	239	0.0219	268
ZFAND6	0.7436	459	0.0801	894	0.8743	197	0.0306	341	0.6674	1199	0.1645	1824	0.5572	2155	0.2762	2918	0.5793	2057	0.2618	2818	0.7719	276	0.0569	648	0.7508	456	0.075	894	-0.6208	9130	0.7871	8320	-0.3702	6177	0.546	5806
FBXO8	0.7434	460	0.0442	503	-0.7405	9708	0.9088	9655	-0.5359	8186	0.7655	8049	0.6414	1234	0.1269	1357	0.6522	1330	0.1205	1396	0.703	649	0.0636	713	0.8447	105	0.0083	117	0.4278	3999	0.3817	4094	0.5735	2157	0.2109	2256
ARHGAP31	0.7433	461	0.0211	244	0.4161	4157	0.374	4006	0.5463	2451	0.1889	2072	0.7321	518	0.0284	329	0.4627	3256	0.2767	2966	0.4563	2970	0.2489	2652	0.8497	92	0.0014	35	0.39	4398	0.3992	4250	0.6225	1612	0.1228	1304
JAM2	0.7432	462	0.0212	245	-0.8874	10522	0.9933	10580	0.4798	3132	0.2672	2840	0.5809	1918	0.1418	1548	0.5796	2052	0.1493	1697	0.6211	1375	0.0927	1041	-0.2783	5350	0.5101	5378	-0.5306	8189	0.8083	8539	0.7126	790	0.0468	535
ITGB8	0.7425	463	0.0212	246	0.5219	3167	0.2723	2931	0.7369	577	0.0283	336	0.336	4594	0.4201	4466	0.4545	3366	0.2863	3080	0.3856	3842	0.3336	3589	0.5865	1800	0.1308	1474	0.521	2946	0.2404	2614	0.6974	905	0.0562	633
GPD1L	0.7423	464	0.0809	901	-0.5156	7550	0.6496	6912	-0.3472	6120	0.5423	5734	0.7305	529	0.0962	998	0.5573	2265	0.2813	3015	-0.4629	7106	0.6068	6442	0.5098	2537	0.3053	3192	0.6337	1622	0.221	2415	-0.6891	9586	0.8386	8906
HPGDS	0.7422	465	0.045	506	0.8465	291	0.0287	326	0.5315	2599	0.2547	2719	0.6089	1584	0.1581	1728	0.6677	1175	0.1054	1235	-0.2868	5265	0.4965	5280	0.689	914	0.0806	958	-0.6019	8945	0.8367	8875	0.8042	260	0.0235	295
AP3D1	0.7419	466	0.0213	249	0.7364	978	0.074	775	0.6878	970	0.0566	675	0.6258	1397	0.1031	1067	0.6129	1698	0.1172	1359	0.7222	551	0.0283	331	0.7143	722	0.0361	451	-0.4422	7261	0.7133	7575	0.5608	2311	0.1819	1968
PANK1	0.7416	467	0.0815	907	-0.5995	8353	0.728	7754	-0.4612	7359	0.6365	6701	0.7547	389	0.0742	809	-0.7675	10289	0.9285	9851	-0.4604	7074	0.6045	6418	0.7302	588	0.0937	1094	-0.7	9843	0.8665	9203	0.8179	207	0.0402	463
ATP8A1	0.7411	468	0.0217	252	0.6227	2102	0.1711	1855	0.5226	2685	0.216	2335	-0.3924	6502	0.6323	6724	-0.5286	8017	0.7961	8370	0.622	1367	0.0921	1034	0.7606	410	0.0163	218	-0.4803	7687	0.7577	8012	0.723	708	0.0412	477
CDC42	0.741	469	0.0218	253	0.3915	4372	0.3981	4245	0.547	2443	0.188	2063	0.4659	3136	0.2661	2823	0.6942	941	0.0508	600	0.5843	1690	0.122	1333	0.5157	2477	0.1996	2158	0.597	2032	0.1542	1669	-0.3313	5810	0.5538	5913
SUMO3	0.7409	470	0.0822	912	-0.8706	10469	0.9668	10291	0.9595	6	0.0007	22	0.6003	1688	0.235	2518	-0.5816	8596	0.7369	7781	0.7772	249	0.0537	616	-0.3863	6283	0.5505	5787	-0.5366	8250	0.7022	7452	0.7678	433	0.0758	823
RNF25	0.7409	471	0.0822	910	0.8058	484	0.0731	769	-0.6803	9717	0.8481	8939	0.3743	4204	0.4335	4590	0.715	748	0.1121	1311	0.6776	831	0.1355	1499	0.7078	764	0.114	1295	0.3782	4522	0.452	4830	-0.2935	5537	0.5034	5365
UQCRB	0.7408	472	0.0822	911	0.7223	1099	0.1506	1615	0.707	804	0.1212	1401	0.568	2045	0.267	2831	0.5189	2670	0.3153	3407	0.4742	2755	0.3277	3515	0.4437	3239	0.363	3810	0.6475	1460	0.2029	2231	0.388	4169	0.4272	4514
SEC14L1	0.7405	473	0.0825	916	-0.5469	7847	0.6785	7200	0.5774	2114	0.2703	2873	0.8615	73	0.0157	180	0.5934	1908	0.2467	2671	0.3131	4578	0.4555	4854	0.3055	4726	0.4685	4923	-0.2894	5822	0.5201	5547	0.6683	1158	0.1704	1812
SPNS1	0.7402	474	0.022	258	0.8817	177	0.0082	104	-0.4023	6689	0.6556	6922	0.5553	2174	0.1658	1812	0.399	3977	0.3543	3818	0.7882	215	0.0082	93	0.4073	3669	0.3269	3409	-0.4996	7875	0.7779	8209	0.4911	3050	0.2568	2717
RGL1	0.7398	475	0.0221	260	-0.2603	5421	0.5159	5438	-0.3219	5891	0.5671	5992	0.4415	3416	0.2956	3139	0.6814	1041	0.0602	714	0.6289	1292	0.0861	970	0.6686	1091	0.0642	784	0.4224	4047	0.3609	3890	0.4658	3329	0.286	3030
VGLL1	0.7395	476	0.0223	262	0.6869	1454	0.1137	1213	0.4541	3425	0.2994	3153	-0.3812	6357	0.6176	6549	0.4304	3666	0.3161	3424	0.6254	1330	0.089	999	0.6863	940	0.0517	625	-0.7279	10044	0.9681	10289	0.8195	200	0.0074	82
NCOA6	0.7393	477	0.0461	514	0.5406	2973	0.2821	3030	0.7093	789	0.0724	850	0.7101	672	0.0681	718	-0.7018	9834	0.9237	9795	0.7446	424	0.0413	470	0.6162	1533	0.1453	1654	-0.6667	9571	0.8957	9506	-0.5998	8667	0.8048	8551
UGT2B7	0.7392	478	0.0836	935	-0.8095	10176	0.9275	9865	0.3912	4196	0.4326	4582	0.5135	2642	0.3142	3327	0.4314	3650	0.3891	4138	0.6706	911	0.1422	1583	0.6273	1432	0.1985	2149	-0.6916	9781	0.8578	9089	0.6732	1116	0.1649	1741
GJA8	0.739	479	0.0839	937	-0.6532	8908	0.7833	8334	-0.725	10045	0.8939	9451	0.5919	1793	0.2442	2621	0.6047	1792	0.2346	2545	0.736	472	0.0824	926	0.4976	2679	0.3161	3305	-0.6874	9748	0.8535	9050	0.2765	5069	0.4854	5166
CXCL1	0.7386	480	0.0227	265	0.7323	1011	0.0776	814	-0.3875	6514	0.6386	6730	-0.5164	7928	0.7859	8290	0.3763	4230	0.3805	4058	0.644	1134	0.074	841	0.3327	4481	0.4152	4331	0.432	3947	0.3489	3770	0.3027	4915	0.4517	4794
CENPF	0.7385	481	0.0228	267	-0.7007	9366	0.9052	9615	-0.219	5391	0.5108	5390	0.7627	358	0.0166	193	0.6335	1514	0.1003	1162	-0.5402	8003	0.7971	8400	-0.3057	5510	0.5301	5582	-0.395	6749	0.6579	6984	-0.76	10119	0.9723	10347
ADRM1	0.7383	482	0.0228	266	0.6953	1374	0.1064	1135	0.698	880	0.0487	587	0.8123	181	0.0056	64	-0.3686	6231	0.6009	6367	0.7578	353	0.0144	170	0.6635	1134	0.0671	816	-0.3395	6208	0.5948	6345	-0.6028	8697	0.8504	9030
KLK6	0.738	483	0.0472	523	0.7232	1089	0.1086	1164	-0.3728	6365	0.6016	6361	0.6781	932	0.0926	971	0.5317	2531	0.2424	2617	0.4832	2672	0.2599	2765	0.4202	3504	0.3451	3611	0.299	5262	0.5005	5347	-0.6102	8764	0.8175	8678
FUT2	0.7378	484	0.1673	1932	-0.6157	8509	0.6799	7223	-0.7047	9908	0.7922	8340	0.6609	1076	0.2545	2718	0.5913	1922	0.3241	3518	0.7756	258	0.122	1334	-0.4627	7221	0.5573	5863	-0.384	6656	0.5372	5718	0.7123	792	0.2072	2215
ZFAND3	0.7373	485	0.0234	271	0.8812	179	0.0084	106	0.6476	1393	0.0888	1042	0.6833	887	0.0556	586	-0.3672	6210	0.5996	6343	0.4106	3536	0.302	3261	0.5623	2032	0.151	1711	0.6664	1267	0.0856	949	0.5679	2227	0.175	1868
CASP8	0.7371	486	0.0235	273	0.4411	3919	0.3479	3751	-0.6726	9648	0.9369	9971	0.5227	2546	0.2007	2187	0.7714	367	0.0152	205	0.5522	2008	0.1483	1651	0.6202	1492	0.1036	1183	0.6126	1846	0.1379	1499	-0.375	6231	0.5959	6365
HPGD	0.737	487	0.0235	272	-0.5154	7547	0.731	7784	-0.4406	7126	0.7037	7411	0.4243	3626	0.3172	3359	0.6288	1555	0.1037	1213	0.3957	3719	0.3226	3460	0.353	4295	0.3917	4096	-0.2725	5724	0.5451	5800	-0.3303	5801	0.553	5903
RFC3	0.7368	488	0.0854	954	-0.719	9536	0.8492	8980	-0.2758	5567	0.508	5359	-0.3701	6237	0.5469	5789	0.8392	127	0.0261	313	0.3173	4542	0.4536	4832	0.4131	3591	0.3929	4109	-0.4277	7105	0.6097	6516	-0.4455	7006	0.6049	6434
NLGN4X	0.7366	489	0.1687	1949	0.7209	1115	0.2156	2274	0.5649	2255	0.3552	3762	0.8211	159	0.0844	901	0.587	1968	0.3273	3545	0.7394	456	0.1614	1781	-0.4823	7450	0.5671	5968	0.2915	5312	0.5009	5354	0.4693	3287	0.4188	4425
ZNF24	0.7366	490	0.0239	275	-0.6801	9168	0.8896	9425	0.4331	3679	0.3229	3437	0.553	2194	0.1679	1832	0.5115	2754	0.2211	2431	0.7373	466	0.0214	252	-0.2767	5342	0.5092	5364	-0.2644	5694	0.5402	5751	0.3403	4603	0.4211	4457
ZNF256	0.7364	491	0.0482	535	0.5481	2893	0.2759	2970	0.5352	2564	0.2499	2677	0.3218	4719	0.4553	4825	0.549	2350	0.2255	2463	-0.4052	6416	0.597	6350	0.4895	2757	0.2692	2830	-0.5579	8481	0.7905	8347	0.6606	1244	0.1221	1294
OR1G1	0.7364	492	0.0239	276	0.3658	4611	0.4208	4493	-0.8663	10599	0.9988	10648	0.6061	1613	0.1199	1268	0.4689	3195	0.2695	2897	0.6938	712	0.0421	478	0.7954	240	0.0078	110	-0.6097	9018	0.8854	9394	0.6378	1456	0.1088	1141
LRRC32	0.7363	493	0.0239	278	0.4735	3606	0.3173	3400	-0.7319	10081	0.9699	10306	0.2964	4929	0.4555	4829	0.4468	3453	0.2956	3184	0.7546	362	0.0154	179	0.734	555	0.0262	326	-0.5853	8747	0.8611	9134	0.7515	516	0.0268	320
GCM1	0.7363	494	0.0239	277	0.4248	4064	0.3656	3909	0.3153	4937	0.456	4831	0.4354	3493	0.3033	3227	0.4969	2891	0.2377	2580	0.6588	995	0.0639	716	0.6461	1265	0.0804	953	0.6647	1284	0.0871	967	0.2759	5072	0.4685	4985
TKTL1	0.7362	495	0.0242	281	-0.5709	8077	0.785	8348	-0.6401	9316	0.9119	9676	0.5299	2449	0.1923	2096	0.8325	150	0.0037	60	0.729	514	0.0254	293	0.6783	1011	0.0579	700	-0.378	6602	0.6356	6780	0.3435	4571	0.4184	4419
DHX38	0.7358	496	0.0244	283	-0.523	7619	0.7376	7854	-0.4008	6663	0.6542	6896	-0.3582	6104	0.5915	6259	0.6303	1542	0.1026	1193	0.6751	860	0.0529	603	0.6114	1579	0.1097	1244	0.4555	3676	0.3191	3435	-0.4233	6768	0.6512	6975
SGK196	0.7354	497	0.0486	542	0.379	4494	0.4272	4559	0.8631	86	0.0056	78	0.614	1534	0.1527	1677	0.714	763	0.0677	804	-0.4861	7369	0.6859	7234	0.6032	1652	0.1566	1756	0.6336	1623	0.1567	1706	-0.7539	10079	0.9447	10059
SLC22A8	0.7351	498	0.0248	290	-0.3181	5715	0.5489	5794	0.4145	3891	0.3475	3689	0.6484	1180	0.0819	882	0.8777	55	0.0007	18	0.7431	433	0.0194	229	0.6533	1198	0.0741	886	-0.2439	5628	0.5324	5669	0.666	1182	0.0834	884
ARL5B	0.7349	499	0.0249	293	0.6121	2198	0.1816	1955	-0.3881	6518	0.6393	6735	-0.4055	6651	0.6512	6932	0.4555	3349	0.2848	3059	0.5413	2122	0.1587	1762	0.3458	4358	0.4008	4178	0.7847	344	0.0143	157	0.6654	1188	0.0842	894
POP5	0.7347	500	0.0249	292	-0.3514	5993	0.573	6094	0.3055	5002	0.4635	4911	0.3975	3933	0.3499	3718	0.5448	2394	0.1818	2036	0.4484	3061	0.2572	2743	0.658	1169	0.0709	852	-0.4832	7712	0.7605	8044	0.6238	1597	0.1213	1290
SUZ12	0.7347	501	0.0487	544	-0.6406	8779	0.8201	8695	0.7312	611	0.057	678	0.7491	423	0.0445	474	0.4554	3355	0.3233	3509	0.5854	1668	0.1637	1808	-0.3626	6014	0.5693	5988	0.3709	4622	0.444	4732	0.3626	4408	0.4246	4500
SLC6A2	0.7347	502	0.0869	969	0.8353	338	0.0554	591	0.5704	2197	0.276	2921	0.6432	1225	0.1843	2016	-0.3113	5688	0.5134	5429	0.6813	810	0.1325	1461	0.7019	804	0.12	1356	-0.7611	10260	0.9224	9801	0.6854	1006	0.1515	1617
IRAK2	0.7344	503	0.0488	546	0.6483	1828	0.1776	1915	-0.7657	10287	0.9645	10259	0.5932	1777	0.1746	1908	-0.3899	6458	0.6051	6421	0.6733	881	0.0851	957	0.2948	4812	0.4663	4891	0.4568	3661	0.3496	3781	0.7072	825	0.0815	862
CENPN	0.7344	504	0.0488	545	-0.2614	5423	0.5162	5441	0.4273	3755	0.3617	3851	0.4101	3797	0.3649	3888	0.7188	723	0.0638	757	0.8539	78	0.0062	74	0.5138	2496	0.2446	2606	-0.2779	5751	0.5408	5760	0.6413	1419	0.1429	1524
IL2RG	0.7341	505	0.0251	295	0.4953	3402	0.2952	3172	0.5568	2337	0.1771	1948	0.3195	4743	0.4371	4629	0.6778	1074	0.063	750	0.4148	3484	0.2968	3195	0.7828	293	0.0108	145	0.6006	1984	0.1504	1633	0.5645	2269	0.1781	1909
PHRF1	0.7337	506	0.0252	299	-0.8262	10284	0.979	10426	0.565	2252	0.1688	1863	-0.518	7952	0.7873	8312	-0.2339	5315	0.503	5312	-0.3397	5669	0.5459	5795	0.7415	509	0.0229	288	0.5385	2744	0.2196	2386	-0.4575	7155	0.6925	7406
GPR113	0.7337	507	0.0489	549	-0.4915	7310	0.6792	7213	0.8227	171	0.0138	174	0.6289	1346	0.1367	1485	-0.5316	8051	0.7513	7912	0.6976	690	0.0675	755	0.5374	2250	0.2218	2386	0.3368	4955	0.4718	5046	0.2776	5066	0.4827	5141
IL1RN	0.7336	508	0.0252	298	-0.6449	8817	0.8606	9112	0.4088	3975	0.3559	3768	0.6609	1075	0.0721	788	0.5545	2295	0.1724	1928	0.5625	1896	0.14	1557	0.4282	3404	0.3009	3152	0.5895	2125	0.1603	1759	0.7023	862	0.0534	600
PSPH	0.7336	509	0.0489	550	-0.3635	6078	0.572	6087	0.6674	1198	0.108	1248	0.3927	3993	0.3866	4117	0.7083	805	0.0724	861	0.5655	1874	0.1827	1999	0.6695	1084	0.0971	1123	0.3988	4297	0.4149	4433	0.3331	4660	0.4472	4738
CTF1	0.7336	510	0.0881	983	0.7295	1032	0.1436	1544	-0.731	10074	0.8993	9532	0.8684	55	0.0133	154	0.6056	1784	0.2338	2533	0.3923	3764	0.401	4266	0.4007	3763	0.4045	4212	0.6908	1027	0.1508	1638	0.6947	933	0.1424	1517
POLR3F	0.7335	511	0.0489	551	0.7953	558	0.0553	589	0.8099	214	0.018	227	0.6845	870	0.0865	921	0.8264	166	0.0125	173	0.5731	1806	0.1755	1935	0.6188	1507	0.1431	1633	0.542	2688	0.26	2831	0.4643	3344	0.3206	3431
DGCR14	0.7333	512	0.0489	548	-0.409	6515	0.61	6488	0.649	1383	0.1253	1442	0.3852	4081	0.3956	4210	0.3563	4444	0.4298	4558	0.4812	2689	0.2619	2785	-0.6699	9587	0.8996	9510	0.3662	4677	0.4478	4775	0.4827	3122	0.3029	3222
TPRA1	0.7333	513	0.0883	985	-0.4135	6559	0.5768	6142	0.6326	1555	0.2076	2260	-0.4889	7616	0.6452	6865	0.5975	1872	0.2434	2626	0.3923	3762	0.401	4264	0.7808	308	0.0551	668	-0.551	8422	0.7155	7589	0.4298	3706	0.394	4190
CACNB4	0.7327	514	0.0259	306	0.6899	1430	0.111	1185	-0.2768	5569	0.5341	5637	0.4131	3765	0.33	3505	0.5871	1966	0.1419	1613	0.5688	1842	0.1349	1494	0.2902	4849	0.4511	4747	-0.3352	6165	0.5918	6311	0.751	519	0.0269	322
TXNDC17	0.7322	515	0.0262	312	-0.6474	8842	0.863	9141	0.3029	5025	0.4648	4924	0.7687	332	0.0148	175	0.5286	2563	0.201	2229	0.6782	829	0.0515	578	0.6153	1541	0.1068	1215	-0.6295	9206	0.9029	9576	0.5574	2342	0.1856	2008
TAF7L	0.7322	516	0.0262	313	0.4219	4085	0.3682	3938	-0.6507	9430	0.9194	9776	0.7954	237	0.0083	110	0.5115	2756	0.2211	2433	0.5881	1643	0.1191	1299	0.4831	2815	0.2368	2535	0.2794	5381	0.5003	5344	0.3839	4211	0.378	4008
IPO4	0.7321	517	0.0902	1011	0.592	2420	0.2823	3037	0.5021	2900	0.3394	3613	0.6113	1562	0.2222	2396	0.7058	825	0.1216	1417	0.8546	75	0.0162	190	0.6949	845	0.1261	1420	-0.4346	7178	0.6167	6580	0.4312	3685	0.3929	4177
ACOT8	0.7321	518	0.0263	314	-0.5654	8016	0.779	8280	0.2846	5129	0.4783	5065	0.5261	2500	0.1973	2150	0.3438	4567	0.4178	4430	0.3562	4167	0.3695	3972	0.6424	1292	0.0841	993	-0.6848	9727	0.9453	10056	-0.4848	7454	0.723	7729
ABCG2	0.7319	519	0.0263	315	-0.364	6082	0.5845	6216	0.6466	1406	0.0902	1071	0.5598	2132	0.1624	1778	-0.4905	7600	0.7542	7938	0.2774	4823	0.442	4711	-0.7539	10204	0.9803	10419	-0.4494	7330	0.7223	7659	-0.3337	5839	0.5558	5944
CRB1	0.7318	520	0.0495	557	-0.6144	8498	0.7946	8449	-0.519	8006	0.7485	7887	0.3755	4188	0.4059	4310	0.3805	4169	0.4049	4280	0.5807	1731	0.1687	1867	0.3401	4404	0.4304	4516	-0.4563	7410	0.6886	7313	-0.3575	6054	0.5636	6013
ARHGAP9	0.7317	521	0.0265	316	-0.4432	6833	0.6604	7043	0.3386	4748	0.4341	4609	0.4037	3871	0.3434	3648	0.6133	1695	0.1166	1356	0.6856	769	0.0474	530	0.5033	2613	0.2131	2293	-0.3507	6314	0.6044	6465	0.6827	1031	0.0691	747
PRMT3	0.7316	522	0.0906	1015	0.6967	1359	0.1772	1911	0.4683	3254	0.366	3892	0.8324	131	0.0284	328	0.9118	23	0.0046	72	0.6223	1364	0.1932	2102	0.5777	1897	0.2499	2663	-0.7841	10370	0.9407	10008	-0.4496	7060	0.6082	6467
GALNTL5	0.7315	523	0.0265	317	0.4452	3880	0.3445	3712	-0.3595	6239	0.6046	6384	0.5144	2636	0.2099	2279	0.4423	3519	0.3016	3259	0.2554	4925	0.4534	4830	-0.5577	8327	0.8243	8704	0.7185	787	0.0452	509	0.4529	3452	0.2991	3172
TBC1D16	0.7313	524	0.0267	318	-0.3611	6061	0.5815	6189	0.6598	1271	0.0798	946	0.6284	1354	0.1012	1043	0.7523	468	0.02	262	-0.2592	5130	0.4818	5123	0.384	3957	0.3547	3708	-0.4033	6855	0.6669	7092	0.639	1439	0.1074	1126
PLXNC1	0.7311	525	0.0268	319	-0.8421	10367	0.9838	10479	0.2577	5261	0.4944	5216	0.3914	4013	0.357	3801	0.5064	2804	0.2279	2484	0.773	269	0.011	129	-0.5203	7883	0.7832	8268	0.4781	3430	0.2926	3159	-0.4477	7036	0.6799	7278
ALG9	0.7311	526	0.05	562	0.6208	2121	0.2056	2180	0.2997	5046	0.4848	5129	0.5772	1946	0.1913	2085	0.3515	4496	0.4337	4607	0.7491	396	0.039	450	0.4769	2883	0.283	2973	0.5054	3115	0.2984	3219	0.8461	109	0.0109	120
IL4R	0.7311	527	0.05	561	-0.3352	5854	0.5504	5802	0.5202	2717	0.2644	2811	0.7368	499	0.0506	525	0.4172	3799	0.3623	3881	0.6625	966	0.0956	1074	0.2484	5057	0.4867	5113	-0.5088	7972	0.742	7844	0.4503	3487	0.3353	3583
TAS2R39	0.731	528	0.05	560	0.8203	418	0.0411	458	-0.5114	7926	0.7415	7810	0.6883	830	0.0835	891	-0.3723	6272	0.588	6220	0.5141	2366	0.2315	2467	0.6615	1145	0.1038	1186	-0.6429	9335	0.8737	9270	0.6905	961	0.0945	996
PRSS35	0.7305	529	0.0504	566	0.7165	1161	0.115	1238	-0.6191	9060	0.8523	8991	-0.3871	6440	0.6017	6386	-0.415	6741	0.6302	6671	0.4694	2815	0.276	2950	0.5453	2173	0.2139	2304	0.6732	1192	0.1145	1268	0.4268	3743	0.3576	3791
EML2	0.7304	530	0.0505	567	0.7977	542	0.0537	576	0.3543	4587	0.442	4690	0.6121	1553	0.1547	1697	0.6481	1372	0.1248	1445	0.6198	1387	0.1325	1460	0.5045	2600	0.2531	2692	0.3557	4792	0.4565	4880	-0.3209	5718	0.5332	5687
ARF6	0.7304	531	0.0505	568	0.4946	3410	0.3218	3461	0.4366	3637	0.3527	3745	-0.3062	5656	0.5301	5623	-0.5658	8413	0.7893	8306	0.8843	35	0.0024	30	-0.4566	7151	0.6643	7045	-0.6598	9504	0.8886	9432	-0.5226	7823	0.724	7742
LRP4	0.7302	532	0.0506	569	0.7305	1026	0.1022	1084	0.5366	2546	0.2483	2656	0.7149	644	0.0649	690	-0.729	10051	0.9422	10010	0.5006	2479	0.2432	2597	0.3663	4149	0.4055	4218	0.5152	3012	0.2893	3112	0.5071	2878	0.2802	2964
TATDN2	0.7302	533	0.0272	321	0.353	4727	0.4327	4615	-0.2843	5612	0.5387	5689	0.3847	4085	0.3657	3897	0.7473	500	0.0227	283	0.7141	598	0.0306	372	0.4488	3174	0.2764	2895	-0.2837	5789	0.552	5884	0.7966	293	0.0124	141
PRB3	0.73	534	0.0274	323	0.5672	2677	0.2254	2406	0.6462	1410	0.0903	1072	0.526	2502	0.1974	2151	-0.3422	5961	0.5746	6060	-0.4023	6368	0.6201	6575	-0.3524	5919	0.5758	6061	0.271	5425	0.5055	5392	0.6795	1066	0.0715	779
PLCD4	0.7298	535	0.0511	575	0.2945	5124	0.4873	5184	0.6658	1212	0.1093	1258	0.5976	1720	0.1712	1864	0.6645	1209	0.1084	1282	0.6128	1450	0.1377	1539	0.5134	2503	0.2447	2609	0.5435	2674	0.2579	2812	0.5827	2041	0.202	2170
PSMB7	0.7296	536	0.0511	576	0.7159	1171	0.1155	1244	0.4528	3442	0.3367	3584	-0.6452	9353	0.8766	9288	0.5307	2543	0.2435	2631	0.4449	3099	0.3014	3253	0.7823	299	0.0268	332	-0.665	9554	0.8938	9486	-0.4613	7190	0.6635	7118
SULT1B1	0.7295	537	0.0512	577	0.7267	1057	0.1057	1127	-0.3121	5809	0.5471	5782	0.4701	3089	0.2994	3176	0.6576	1272	0.1154	1348	-0.4727	7232	0.6717	7094	0.3396	4412	0.4309	4523	0.5661	2390	0.2327	2533	-0.3491	5983	0.5564	5950
PRR15L	0.7295	538	0.0275	324	0.6774	1547	0.1227	1325	-0.7333	10089	0.9705	10312	0.812	183	0.0057	67	0.3689	4309	0.3893	4142	0.7083	620	0.0338	411	0.6595	1157	0.0702	842	-0.2509	5649	0.5347	5692	-0.5927	8598	0.8401	8920
ATP6V0A2	0.7293	539	0.1774	2018	-0.9434	10638	0.9811	10447	0.9054	36	0.026	307	0.461	3199	0.4157	4414	-0.6873	9716	0.7704	8107	-0.5864	8584	0.6536	6911	-0.4141	6640	0.5332	5618	0.9072	32	0.0272	299	0.6072	1774	0.3165	3387
ERI1	0.7293	540	0.0276	325	0.8271	381	0.0238	266	0.4025	4052	0.3624	3857	0.659	1088	0.0731	797	0.4353	3601	0.3108	3358	0.4652	2872	0.2391	2556	0.4875	2774	0.2316	2481	0.8658	83	0.0014	26	-0.2984	5566	0.5275	5618
HTR3E	0.7292	541	0.0935	1055	0.7151	1177	0.1576	1703	-0.6083	8935	0.7747	8144	0.717	627	0.1072	1117	0.5346	2500	0.301	3246	0.7263	530	0.0916	1026	0.5284	2349	0.2906	3049	-0.7796	10355	0.937	9950	-0.3557	6036	0.5348	5706
LYZ	0.7291	542	0.0935	1056	-0.6381	8748	0.7689	8171	0.4468	3518	0.3852	4116	0.7374	494	0.0895	944	0.6764	1090	0.1516	1714	-0.5011	7520	0.6391	6765	0.5974	1712	0.23	2465	-0.7441	10154	0.9098	9647	0.6615	1233	0.1786	1919
ARHGAP1	0.7289	543	0.0516	580	0.6262	2071	0.2	2133	-0.6245	9134	0.8582	9049	0.64	1251	0.1282	1376	0.3833	4149	0.4021	4260	0.7291	513	0.0489	547	0.6584	1167	0.1066	1210	-0.5891	8793	0.8219	8720	0.4858	3092	0.3003	3189
C6orf118	0.7286	544	0.0517	582	-0.7439	9742	0.9113	9686	0.7663	393	0.0367	445	0.6009	1676	0.1678	1830	0.6578	1270	0.1153	1347	0.5401	2133	0.2058	2230	-0.3409	5804	0.5471	5751	0.6539	1391	0.1351	1465	0.463	3358	0.3216	3435
OGFOD1	0.7282	545	0.0278	329	0.5647	2709	0.2281	2436	-0.2692	5521	0.5284	5574	0.5645	2080	0.1581	1729	0.6561	1287	0.0788	945	0.5771	1772	0.1284	1417	0.5906	1769	0.1273	1436	-0.3566	6364	0.6116	6533	0.8002	275	0.0116	128
ARL2	0.7278	546	0.1787	2034	0.3952	4341	0.4622	4918	-0.7128	9965	0.8023	8465	0.9162	21	0.0207	243	0.9538	8	0.0064	95	0.8619	59	0.0504	564	0.8549	78	0.0573	692	-0.6922	9788	0.7772	8205	-0.5791	8445	0.6525	6990
CCL8	0.7278	547	0.0281	335	0.7129	1199	0.0925	971	-0.4834	7610	0.7549	7948	0.4501	3316	0.2846	3011	0.4944	2918	0.2401	2595	0.4889	2604	0.2125	2287	0.503	2618	0.2138	2302	0.7007	942	0.0568	628	0.2466	5184	0.482	5135
CPD	0.7276	548	0.0282	336	-0.487	7264	0.7054	7494	0.4852	3077	0.2614	2774	-0.5156	7917	0.7847	8276	0.3521	4491	0.4083	4329	0.6834	792	0.0491	549	-0.4942	7581	0.7542	7966	0.6508	1419	0.0996	1083	0.771	420	0.0199	252
PTRH1	0.7273	549	0.0526	584	-0.711	9453	0.8853	9378	0.6909	948	0.0853	1008	-0.6048	8939	0.8357	8843	0.6122	1705	0.1606	1802	0.6433	1144	0.1111	1227	0.6124	1565	0.1484	1684	0.3692	4646	0.4449	4741	0.6551	1295	0.1284	1357
GHRL	0.7268	550	0.0285	337	0.6984	1347	0.1037	1104	0.5064	2849	0.2375	2526	0.7728	315	0.0142	162	0.5951	1895	0.1335	1542	0.6493	1081	0.0706	793	0.5996	1683	0.1193	1345	0.5652	2406	0.1871	2039	0.3452	4556	0.4162	4401
NFATC3	0.7266	551	0.0285	338	0.5962	2369	0.1972	2101	-0.346	6105	0.5899	6235	0.5806	1919	0.142	1554	0.5159	2706	0.2159	2374	0.6052	1505	0.1053	1177	0.5052	2592	0.2104	2265	-0.7188	9979	0.9623	10238	0.53	2629	0.2148	2301
CTHRC1	0.7264	552	0.0531	587	-0.8228	10262	0.9642	10274	0.5696	2205	0.2095	2278	0.3401	4561	0.4409	4666	0.3393	4623	0.4439	4707	-0.55	8135	0.7617	7981	0.6053	1636	0.1542	1734	0.4705	3500	0.3347	3601	0.3681	4350	0.4199	4434
PLSCR4	0.7264	553	0.0531	586	0.474	3601	0.3408	3671	0.6179	1697	0.1596	1776	0.4118	3777	0.363	3873	0.4626	3258	0.3137	3381	0.4443	3105	0.3017	3257	0.8357	120	0.0094	132	0.6228	1737	0.1681	1845	0.4308	3692	0.3541	3754
GIT2	0.7261	554	0.0286	339	0.695	1378	0.1065	1139	-0.4872	7654	0.7589	7988	0.3758	4183	0.3753	3991	0.4631	3251	0.2762	2961	0.7968	189	0.0062	73	-0.4761	7375	0.7292	7711	0.3373	4954	0.4539	4853	-0.5163	7757	0.7577	8076
DUSP8	0.726	555	0.0288	342	-0.4589	6995	0.6775	7188	0.318	4908	0.4529	4790	0.7424	467	0.0233	267	-0.2409	5331	0.5052	5338	0.7048	640	0.0352	420	0.599	1693	0.1199	1352	-0.5838	8731	0.8598	9118	-0.8246	10465	0.9929	10577
SGPP1	0.7258	556	0.0288	341	-0.3478	5958	0.5713	6075	0.3038	5016	0.4643	4921	0.6767	941	0.0618	656	-0.2802	5482	0.5231	5538	0.5609	1908	0.1412	1575	0.5645	2015	0.1501	1701	0.5046	3129	0.2602	2833	0.7633	450	0.022	272
CD24	0.7256	557	0.0535	592	-0.3786	6209	0.5854	6226	0.3028	5027	0.4831	5118	0.7969	232	0.0225	262	0.5217	2643	0.2535	2737	0.7905	209	0.0217	256	-0.4367	6928	0.6448	6826	0.3704	4627	0.444	4733	0.7723	415	0.0399	460
SLC25A15	0.7256	558	0.0535	591	0.7207	1117	0.111	1183	0.5568	2340	0.2245	2414	0.7854	265	0.0258	299	0.6681	1171	0.1049	1228	0.7476	402	0.0401	457	0.7849	284	0.0258	318	-0.2987	5876	0.5501	5854	-0.5351	7956	0.7365	7877
LAPTM4A	0.7256	559	0.0288	343	0.6998	1336	0.1031	1094	0.6941	921	0.0515	618	0.5909	1803	0.1326	1434	0.5803	2037	0.1487	1688	0.4991	2494	0.2016	2180	-0.4902	7535	0.7483	7910	-0.6215	9143	0.8961	9512	-0.2934	5536	0.5244	5589
AKAP17A	0.7254	560	0.0537	594	0.8074	476	0.0483	517	0.5024	2896	0.2838	3001	0.4603	3206	0.3103	3291	0.8456	106	0.0086	118	-0.8289	10525	0.99	10544	0.6455	1272	0.1182	1333	0.56	2477	0.2394	2598	-0.557	8197	0.7603	8104
LAD1	0.7253	561	0.0289	344	0.6752	1569	0.1243	1344	-0.5561	8392	0.8316	8754	0.75	421	0.0201	237	0.678	1069	0.0627	745	0.3478	4240	0.3795	4060	0.8749	49	0.0006	16	0.3515	4834	0.4418	4707	-0.3851	6337	0.6074	6459
CLCA1	0.7252	562	0.0291	349	0.8642	225	0.0122	147	0.4285	3740	0.3282	3498	-0.4983	7721	0.7658	8089	0.5989	1856	0.1303	1509	-0.5154	7705	0.7703	8074	0.6617	1144	0.0682	826	0.6189	1783	0.1316	1436	0.6205	1630	0.124	1317
DOC2A	0.7247	563	0.0541	598	-0.3156	5704	0.5381	5691	0.78	319	0.0296	356	0.3336	4608	0.4457	4699	0.4568	3327	0.3222	3497	-0.4135	6510	0.6059	6433	0.5305	2329	0.2291	2455	0.3215	5097	0.4849	5179	0.4327	3665	0.3524	3738
EMR1	0.7246	564	0.0296	351	0.6448	1866	0.1514	1622	-0.3744	6385	0.6211	6557	0.27	5098	0.4735	5015	0.759	437	0.0179	239	0.7346	480	0.0225	264	0.7222	648	0.0319	402	0.7409	615	0.0321	357	0.8496	100	0.003	33
TNNT2	0.7246	565	0.0978	1100	0.6467	1843	0.2262	2413	0.4174	3862	0.4108	4365	-0.6109	9007	0.7744	8178	0.7663	392	0.0679	810	0.7701	283	0.0578	656	0.6798	998	0.1399	1587	-0.4219	7046	0.6047	6468	0.5558	2367	0.2918	3088
RGS8	0.7246	566	0.0978	1099	0.5465	2916	0.3216	3456	-0.4749	7507	0.6478	6830	0.3725	4220	0.435	4603	0.6981	909	0.1292	1493	0.6205	1379	0.1951	2121	-0.7972	10428	0.9539	10137	0.3637	4711	0.4624	4940	0.8874	40	0.0102	105
B3GALNT1	0.7245	567	0.0978	1101	-0.7853	10023	0.9065	9630	0.3127	4956	0.4814	5093	0.721	601	0.1045	1087	0.8691	71	0.0133	182	0.5849	1673	0.2328	2483	0.333	4479	0.4548	4785	-0.6563	9471	0.8229	8740	0.4076	3936	0.4119	4355
MSI2	0.7243	568	0.0545	605	0.3333	4856	0.4613	4911	0.5933	1948	0.1851	2035	-0.6122	9017	0.8436	8930	0.521	2653	0.2548	2746	0.6733	882	0.0852	959	0.7249	626	0.056	677	-0.3839	6654	0.6196	6614	0.8255	179	0.017	210
EFCAB1	0.7241	569	0.0545	608	0.4444	3888	0.368	3934	-0.598	8836	0.8324	8760	0.5484	2244	0.22	2375	-0.3695	6241	0.5846	6182	0.6685	922	0.0902	1007	0.4701	2964	0.2901	3044	-0.5853	8745	0.8184	8670	0.5476	2457	0.2407	2570
CYP3A5	0.7241	570	0.0298	353	0.4974	3383	0.2935	3151	-0.5096	7908	0.7842	8262	0.3288	4650	0.4289	4545	0.745	509	0.0235	292	0.4342	3227	0.2742	2931	0.6885	917	0.0507	608	0.3419	4913	0.4505	4808	0.6689	1152	0.0812	858
CXCL13	0.724	571	0.0546	610	0.3517	4736	0.4482	4776	-0.2985	5703	0.5379	5679	-0.4428	7089	0.6596	7009	0.4647	3233	0.3106	3357	-0.3637	5928	0.554	5887	0.7481	478	0.0428	524	0.3135	5171	0.49	5255	0.8468	107	0.0108	116
ZBTB25	0.724	572	0.03	360	0.638	1941	0.1572	1700	-0.3412	6058	0.5847	6175	-0.3528	6048	0.5859	6207	0.6923	960	0.0523	618	0.3434	4284	0.3848	4114	0.8787	43	0.0005	15	0.2427	5513	0.5165	5509	0.4002	4016	0.3595	3807
WFDC5	0.724	573	0.03	357	0.5468	2907	0.2476	2672	0.5639	2266	0.1697	1873	0.4653	3146	0.2671	2833	0.6582	1262	0.0777	922	0.55	2030	0.1504	1667	0.679	1004	0.057	689	0.5621	2441	0.1904	2089	0.358	4441	0.4031	4283
ARV1	0.7238	574	0.0546	609	-0.4304	6718	0.6283	6704	0.5226	2684	0.2619	2782	0.7797	288	0.028	324	0.5258	2599	0.2486	2690	-0.5469	8095	0.758	7939	-0.3947	6393	0.6011	6319	-0.4324	7144	0.6651	7059	0.4352	3645	0.3502	3711
BCS1L	0.7237	575	0.03	355	-0.4108	6530	0.6266	6692	0.5467	2446	0.1885	2066	0.5921	1790	0.1318	1420	-0.6312	9142	0.903	9545	-0.4276	6682	0.6536	6909	0.7696	362	0.0139	191	0.5508	2594	0.204	2246	0.76	472	0.0231	287
CLCNKB	0.7233	576	0.0549	614	0.4002	4298	0.4102	4371	0.5611	2292	0.2197	2372	0.6404	1246	0.1276	1370	-0.2763	5463	0.518	5481	0.4528	3012	0.2938	3162	0.6173	1524	0.1444	1646	-0.5359	8244	0.7687	8127	-0.3725	6199	0.5781	6176
ANK1	0.7232	577	0.0303	361	0.4454	3878	0.3445	3711	0.7027	838	0.0464	557	0.5322	2417	0.1902	2073	0.7754	350	0.0143	192	0.3786	3935	0.3426	3689	0.7984	227	0.0074	105	-0.5329	8214	0.81	8563	0.556	2362	0.1866	2026
HERC1	0.723	578	0.0991	1114	0.2601	5255	0.4953	5257	0.5428	2479	0.3033	3208	-0.6094	8989	0.7726	8152	0.2966	4942	0.4804	5088	0.6902	741	0.1244	1365	0.427	3421	0.3802	3990	-0.426	7087	0.6084	6501	0.6843	1016	0.1523	1626
TREX1	0.7229	579	0.1835	2071	-0.489	7280	0.5784	6157	0.4788	3147	0.4178	4440	0.9292	11	0.0147	173	-0.7655	10278	0.8618	9118	0.7997	182	0.0992	1113	0.9723	2	0.0018	41	-0.6145	9069	0.6968	7397	-0.7498	10060	0.8326	8845
MAP3K14	0.7226	580	0.0555	619	0.4918	3444	0.3245	3492	-0.5978	8834	0.8322	8758	0.8268	145	0.0117	140	-0.6119	8930	0.8402	8836	0.7207	565	0.0531	606	0.5068	2581	0.2509	2673	-0.4377	7206	0.67	7123	0.757	491	0.0491	555
MTO1	0.7226	581	0.0305	363	0.6652	1665	0.1329	1438	-0.3082	5777	0.5561	5878	0.328	4655	0.4293	4550	0.61	1745	0.1202	1394	0.5866	1655	0.1198	1307	0.286	4882	0.4548	4784	0.5891	2128	0.1609	1768	0.3366	4631	0.4241	4493
ZNF543	0.7224	582	0.0557	620	0.3644	4629	0.4385	4670	0.3807	4318	0.4163	4414	-0.2867	5511	0.5201	5505	0.549	2349	0.2255	2462	0.3508	4211	0.4066	4330	0.797	235	0.0213	277	0.5287	2864	0.2737	2969	0.517	2768	0.2701	2849
GFOD1	0.7223	583	0.0996	1120	-0.7717	9950	0.8952	9483	0.882	60	0.01	129	0.4704	3085	0.3486	3706	0.574	2104	0.2651	2865	0.7596	343	0.0644	724	0.7974	232	0.0441	535	-0.5814	8701	0.7446	7868	-0.5044	7658	0.6532	7000
SMOC1	0.7219	584	0.0559	622	-0.8064	10155	0.9557	10179	-0.3166	5848	0.5507	5827	0.6556	1118	0.1127	1199	0.5567	2274	0.2173	2394	-0.5016	7524	0.702	7408	0.6116	1577	0.1491	1694	-0.339	6198	0.5807	6189	0.7948	302	0.0279	337
GCNT1	0.7219	585	0.0311	368	0.371	4573	0.4163	4442	-0.4778	7546	0.7487	7888	0.4053	3847	0.3409	3618	0.5887	1945	0.141	1602	0.5637	1889	0.1385	1544	0.4665	2997	0.2551	2710	-0.6835	9715	0.944	10047	0.8778	52	0.0009	12
GFRA2	0.7218	586	0.0311	365	0.6695	1625	0.1299	1407	-0.6114	8975	0.8864	9371	0.3874	4057	0.3619	3866	0.4454	3473	0.2978	3205	0.3877	3817	0.3312	3563	0.7028	795	0.0422	516	-0.6669	9576	0.9333	9909	-0.3936	6429	0.6168	6564
BCL2L13	0.7217	587	0.0311	364	0.7221	1103	0.0851	887	-0.5954	8805	0.87	9188	0.6662	1022	0.0694	738	0.7753	351	0.0143	190	0.4816	2685	0.2219	2374	0.7033	789	0.0419	513	0.5816	2204	0.1678	1844	0.559	2328	0.1836	1992
ZNF33B	0.7211	588	0.1857	2102	0.7035	1292	0.2346	2522	-0.754	10220	0.8507	8975	-0.7955	10428	0.8934	9451	-0.5319	8054	0.6138	6511	0.8142	150	0.087	980	0.4601	3057	0.4102	4278	0.5811	2209	0.3455	3725	-0.5761	8417	0.6486	6950
U2SURP	0.7206	589	0.0314	371	0.5247	3138	0.2699	2899	-0.2473	5433	0.5183	5451	0.5666	2054	0.1567	1714	0.6572	1277	0.0782	933	0.7188	583	0.0296	356	0.8866	36	0.0004	12	-0.5703	8604	0.8477	8984	0.6085	1758	0.1363	1448
CCS	0.7205	590	0.0314	370	-0.7595	9864	0.9453	10060	0.8892	51	0.0004	7	0.8002	224	0.0076	94	0.5529	2313	0.1736	1944	0.7395	454	0.0205	239	0.685	953	0.0521	635	-0.8302	10542	0.9969	10623	0.6275	1555	0.118	1234
CNTRL	0.7204	591	0.0571	628	0.4806	3555	0.3347	3611	0.6248	1620	0.1514	1677	0.4182	3702	0.357	3803	0.6432	1422	0.129	1489	0.464	2890	0.283	3030	0.4499	3161	0.3101	3241	0.3557	4793	0.4565	4882	-0.5323	7927	0.7337	7852
NDUFA5	0.7202	592	0.0572	629	0.4972	3387	0.3199	3443	0.4198	3835	0.3702	3940	-0.3308	5839	0.5479	5801	0.4905	2960	0.2854	3072	0.7282	523	0.0493	554	0.7494	469	0.042	515	0.7876	327	0.0309	346	0.6113	1716	0.1736	1846
MMP13	0.72	593	0.0315	372	0.7332	1005	0.0765	805	-0.3049	5752	0.5532	5855	-0.2947	5571	0.5313	5635	0.7066	817	0.0432	492	0.7474	405	0.018	210	0.7082	762	0.0396	484	-0.3162	6012	0.5755	6131	-0.4067	6583	0.631	6751
OR6W1P	0.7196	594	0.0578	636	-0.6061	8421	0.7857	8357	0.5226	2686	0.2619	2783	0.5279	2475	0.2402	2574	0.4802	3078	0.2952	3180	0.3709	4012	0.3839	4105	0.6121	1569	0.1487	1688	-0.5726	8626	0.8072	8528	0.7893	335	0.0308	362
PCDHA2	0.7195	595	0.0319	374	0.7747	690	0.0474	507	-0.6153	9020	0.8899	9409	-0.5474	8251	0.8182	8660	0.6176	1664	0.113	1326	-0.3344	5628	0.5395	5744	0.585	1814	0.1322	1489	-0.4738	7613	0.7508	7927	0.4956	3006	0.2513	2673
TCL1B	0.719	596	0.0322	377	-0.8101	10183	0.9731	10355	0.4459	3528	0.3095	3277	0.61	1574	0.1155	1225	0.5506	2333	0.1753	1969	0.6056	1501	0.105	1172	0.65	1231	0.0763	914	0.5438	2669	0.2145	2335	-0.5234	7832	0.7648	8148
NPNT	0.719	597	0.102	1145	0.8004	525	0.0778	819	0.8294	159	0.0299	362	0.6985	756	0.1257	1343	0.5619	2223	0.2773	2970	0.5156	2351	0.2907	3123	0.6408	1307	0.1821	1989	-0.6857	9738	0.8521	9037	0.6121	1707	0.2355	2516
KCNA7	0.719	598	0.0323	378	0.6849	1476	0.1149	1236	0.8402	135	0.0031	51	0.7208	605	0.0342	384	0.7962	274	0.009	127	0.2579	4914	0.4521	4814	0.2996	4776	0.4445	4677	0.3143	5166	0.4756	5087	0.6067	1780	0.1381	1464
CSTB	0.7189	599	0.0324	379	0.7156	1176	0.0906	945	0.5719	2186	0.1623	1804	0.6087	1588	0.1168	1238	0.429	3689	0.3177	3455	0.3541	4184	0.3718	3992	0.4416	3256	0.2836	2979	-0.3301	6125	0.5872	6259	0.5857	2008	0.1577	1672
NAGPA	0.7184	600	0.1892	2144	-0.4535	6939	0.5618	5971	-0.4352	7063	0.5617	5943	-0.4659	7357	0.5684	6021	0.83	157	0.0789	946	-0.359	5874	0.5059	5371	0.816	171	0.0893	1051	0.3244	5081	0.495	5303	-0.4018	6515	0.5366	5725
PRDM7	0.7183	601	0.0585	641	0.3863	4434	0.4217	4510	-0.5206	8029	0.7504	7904	-0.4395	7046	0.6558	6972	0.7404	544	0.051	607	-0.4085	6453	0.6005	6379	0.3787	4018	0.3921	4102	0.2453	5507	0.5231	5581	0.4072	3942	0.3809	4035
BATF2	0.7183	602	0.0325	381	0.7944	567	0.0361	401	0.6431	1443	0.0935	1105	0.7712	326	0.0145	169	0.4393	3557	0.3051	3291	0.5475	2057	0.1525	1686	0.7644	386	0.0154	206	-0.541	8300	0.8181	8661	-0.2986	5567	0.5276	5620
ZNF835	0.7182	603	0.0585	642	-0.518	7573	0.7013	7461	0.6616	1254	0.1129	1306	0.8941	33	0.0021	26	0.4742	3136	0.3006	3240	0.6997	676	0.0658	739	0.4415	3258	0.3221	3367	-0.569	8600	0.8042	8496	-0.6202	8864	0.8267	8766
NEUROG1	0.7182	604	0.0587	647	0.9271	77	0.005	69	0.2989	5051	0.4852	5131	0.8194	163	0.0138	160	0.8261	167	0.0126	175	-0.4645	7127	0.6631	7003	0.7141	725	0.0629	772	0.5714	2326	0.2259	2472	-0.4501	7064	0.652	6984
CACNB3	0.7178	605	0.1032	1161	-0.4684	7090	0.6166	6564	0.6068	1810	0.2369	2523	0.7948	239	0.0471	495	0.5072	2796	0.3245	3521	0.8432	92	0.0209	247	0.7271	612	0.097	1122	0.3735	4588	0.4555	4868	0.7282	666	0.1108	1160
B3GALNT2	0.7177	606	0.0591	656	0.8874	163	0.0144	179	0.4389	3608	0.3503	3720	0.8373	114	0.0097	126	0.3664	4339	0.4189	4441	0.4652	2873	0.2822	3021	0.6614	1148	0.1038	1188	-0.4948	7828	0.7271	7709	0.4173	3846	0.3668	3901
PLK2	0.7177	607	0.0591	653	0.5655	2698	0.258	2775	0.635	1524	0.1397	1580	0.5385	2357	0.23	2467	0.557	2269	0.2172	2390	0.8041	170	0.0165	193	0.7201	669	0.0591	715	0.4625	3599	0.3445	3712	0.3454	4555	0.4377	4646
MLX	0.7176	608	0.1034	1162	-0.8326	10322	0.945	10056	-0.7519	10205	0.9157	9730	0.8282	143	0.0298	346	0.5368	2482	0.2984	3215	0.6401	1175	0.1737	1914	0.3662	4150	0.4329	4536	0.6243	1726	0.2318	2521	0.5538	2390	0.2937	3104
ABCC9	0.7174	609	0.1034	1163	-0.5974	8329	0.7252	7716	-0.6977	9853	0.865	9137	-0.411	6711	0.5805	6149	0.9363	15	0.002	43	0.6648	951	0.1487	1657	0.6084	1609	0.2187	2357	-0.6927	9791	0.859	9106	0.7907	325	0.0588	663
PRDX1	0.7174	610	0.0331	384	0.8079	473	0.0301	337	0.392	4189	0.3731	3975	-0.3653	6193	0.598	6350	0.7303	617	0.0309	361	-0.6556	9367	0.9227	9760	0.4064	3684	0.3278	3424	-0.2223	5594	0.5265	5614	0.6242	1591	0.1208	1279
MAB21L2	0.7172	611	0.0333	386	-0.4688	7095	0.6867	7288	0.2646	5233	0.4919	5185	0.7698	331	0.0147	172	0.6121	1706	0.118	1372	0.7828	236	0.0093	108	0.4858	2793	0.2335	2505	-0.7099	9920	0.9576	10196	0.8027	268	0.0107	113
DDX52	0.7171	612	0.0333	387	-0.551	7884	0.7644	8136	0.2982	5054	0.4691	4971	0.6153	1516	0.1112	1177	0.4986	2875	0.2357	2567	0.2568	4918	0.4529	4822	0.6327	1389	0.092	1075	-0.5033	7915	0.7819	8260	0.7847	360	0.0154	195
LRIG1	0.7165	613	0.1044	1170	0.7572	809	0.1162	1255	0.6752	1103	0.1549	1716	0.8783	45	0.0104	131	0.8128	211	0.0381	431	0.5267	2245	0.2831	3032	0.5408	2215	0.2816	2956	-0.7833	10369	0.9399	9995	-0.5654	8298	0.7071	7563
HIST1H3F	0.7165	614	0.0599	668	0.3748	4536	0.4308	4593	0.6631	1242	0.1116	1293	0.7649	349	0.0348	394	0.6266	1582	0.1445	1640	0.786	223	0.0229	270	0.5558	2075	0.2049	2209	-0.3795	6616	0.6159	6574	0.6644	1195	0.1185	1243
TINF2	0.7164	615	0.1045	1171	-0.7887	10043	0.9095	9661	0.7309	615	0.0997	1157	0.3049	4856	0.475	5026	0.7983	268	0.0465	537	-0.5533	8187	0.6956	7345	0.6463	1263	0.1761	1938	0.7314	691	0.1096	1198	0.6327	1516	0.2137	2284
EFCAB4B	0.7164	616	0.0337	389	0.7768	674	0.0449	493	0.3389	4743	0.4336	4597	-0.3607	6135	0.5934	6282	0.7304	616	0.0309	360	0.729	515	0.0254	294	0.4032	3727	0.3327	3462	-0.6434	9340	0.9151	9711	0.7071	828	0.0504	569
SLC25A13	0.7163	617	0.034	393	-0.5848	8208	0.7992	8487	0.4989	2938	0.245	2608	0.6824	897	0.0563	593	-0.3708	6258	0.6037	6402	0.5651	1883	0.1374	1536	0.6648	1112	0.0662	804	-0.6757	9651	0.9392	9988	0.7382	600	0.0329	394
UBB	0.7159	618	0.1049	1175	0.4871	3494	0.3634	3887	0.4335	3672	0.3972	4242	-0.3473	5993	0.5309	5631	0.8028	245	0.0437	497	0.4799	2699	0.3235	3469	0.3881	3911	0.4167	4352	-0.3571	6369	0.5566	5935	0.3433	4574	0.4574	4854
COL2A1	0.7156	619	0.0344	395	-0.815	10217	0.9754	10388	0.4975	2954	0.2464	2624	0.3648	4306	0.388	4132	0.4592	3301	0.2806	3005	0.343	4293	0.3849	4117	-0.3566	5961	0.5813	6112	0.512	3045	0.2503	2726	0.5206	2731	0.2256	2415
ZNF236	0.7156	620	0.0344	396	0.5819	2513	0.2098	2212	0.4803	3128	0.2666	2834	0.6838	880	0.055	583	0.5569	2270	0.1706	1907	0.6302	1274	0.0851	958	0.7853	279	0.0102	139	0.6875	1054	0.0682	763	0.8266	170	0.0066	68
SPRY3	0.7155	621	0.192	2177	-0.4047	6479	0.5365	5669	0.8308	154	0.0775	919	0.6835	883	0.2311	2475	0.592	1919	0.3235	3512	0.7938	196	0.105	1174	0.4023	3740	0.4483	4715	0.6899	1034	0.237	2576	-0.7366	9974	0.817	8670
TIPRL	0.7153	622	0.0606	677	0.8001	527	0.0524	563	0.6043	1831	0.1716	1896	-0.4687	7390	0.6854	7291	0.4295	3681	0.3491	3767	0.5491	2037	0.1979	2142	0.8017	216	0.02	264	0.7013	935	0.0875	969	0.5404	2529	0.2474	2632
GAA	0.715	623	0.061	681	0.3286	4888	0.4648	4942	-0.3505	6153	0.5792	6127	0.3885	4041	0.3916	4168	-0.5641	8392	0.788	8289	0.6721	895	0.0862	972	0.7278	608	0.0541	657	0.594	2069	0.2012	2204	0.8176	209	0.0187	239
PPP2CA	0.715	624	0.0347	400	0.4708	3637	0.3195	3439	0.4638	3310	0.2877	3031	-0.6281	9178	0.9038	9545	0.67	1156	0.0697	832	0.9262	12	0.0001	3	0.7339	557	0.0262	327	0.3726	4602	0.4178	4472	0.8562	89	0.0021	21
TULP4	0.7148	625	0.0347	399	-0.4406	6809	0.6578	7009	-0.2799	5586	0.5362	5657	-0.5565	8371	0.826	8753	0.5434	2407	0.1841	2056	0.6371	1199	0.0798	900	0.6063	1629	0.1137	1291	0.3759	4552	0.4135	4413	0.5757	2123	0.1673	1768
FAM3C	0.7146	626	0.0614	684	0.7928	579	0.0572	612	0.5495	2424	0.2337	2495	0.3768	4171	0.4051	4306	0.5341	2506	0.2405	2601	0.8311	110	0.0092	105	0.6097	1597	0.1502	1703	-0.4243	7070	0.657	6975	-0.3997	6491	0.6056	6443
ADRB1	0.7144	627	0.0615	686	0.6772	1550	0.1521	1635	-0.379	6428	0.6063	6399	-0.4368	7024	0.6532	6953	0.4274	3712	0.3514	3789	0.6968	695	0.0684	767	0.7107	753	0.0653	797	-0.4381	7216	0.6701	7126	0.3996	4023	0.3872	4117
PRR5	0.7143	628	0.1935	2193	-0.398	6398	0.5337	5644	0.5345	2572	0.3806	4047	0.3292	4648	0.4838	5109	0.6203	1642	0.2981	3212	-0.5064	7575	0.5809	6152	0.8073	196	0.0972	1124	0.3862	4437	0.4718	5048	0.3302	4695	0.4841	5152
HUS1	0.7136	629	0.035	403	-0.314	5687	0.5467	5763	0.5963	1911	0.1392	1569	0.5423	2311	0.1789	1958	0.8275	164	0.0039	63	-0.295	5316	0.5022	5339	-0.5031	7685	0.7645	8074	0.537	2768	0.2213	2417	-0.4984	7595	0.7385	7899
POLG	0.7135	630	0.0351	404	0.3562	4699	0.4296	4584	0.6861	993	0.0576	684	0.3452	4511	0.4125	4373	0.7341	579	0.0292	340	-0.62	8967	0.8879	9371	0.4984	2670	0.2186	2354	0.3706	4625	0.4194	4491	0.5265	2668	0.219	2351
SLCO1A2	0.7129	631	0.063	693	0.841	316	0.0311	344	-0.5062	7872	0.7353	7753	-0.2711	5414	0.5136	5438	0.7361	567	0.0531	629	0.8247	127	0.0104	121	0.7201	668	0.059	714	-0.7211	9995	0.9367	9948	0.8011	272	0.025	309
ZNRD1	0.7129	632	0.063	692	0.4301	4013	0.3808	4075	0.7335	600	0.056	669	0.585	1869	0.1823	2001	0.4696	3189	0.3057	3304	0.4487	3057	0.2975	3210	-0.4327	6880	0.6403	6773	0.4763	3451	0.3296	3542	0.5063	2893	0.2811	2973
GALNT8	0.7126	633	0.0357	409	0.6907	1421	0.11	1176	0.723	679	0.0354	433	-0.2784	5453	0.5193	5492	0.6557	1290	0.079	950	0.7296	510	0.0251	292	0.7182	688	0.0338	422	0.3634	4715	0.4283	4577	0.4422	3567	0.3118	3325
GOPC	0.7124	634	0.0632	695	0.7481	886	0.0894	931	0.5356	2557	0.2495	2668	0.2764	5073	0.4854	5133	-0.4163	6757	0.6315	6682	0.2898	4755	0.4547	4846	-0.5587	8345	0.7787	8219	-0.3851	6662	0.6202	6626	0.6641	1202	0.1188	1250
MMAB	0.7123	635	0.1088	1214	-0.517	7564	0.6513	6931	0.4787	3148	0.357	3788	0.822	156	0.033	376	0.5058	2808	0.3252	3532	0.5822	1714	0.236	2515	-0.6237	9099	0.7846	8287	-0.8825	10624	0.9888	10534	0.6589	1262	0.1818	1965
TCF19	0.7123	636	0.0632	696	0.7172	1153	0.1143	1229	-0.5956	8808	0.8299	8738	0.7424	466	0.0479	499	0.3193	4783	0.4595	4862	-0.6022	8773	0.8234	8678	0.4797	2842	0.2803	2940	-0.5045	7928	0.7376	7795	-0.4817	7410	0.6843	7317
GNB3	0.7123	637	0.0359	412	-0.3536	6011	0.5748	6115	-0.5412	8242	0.8167	8619	-0.3611	6142	0.5936	6289	-0.2063	5280	0.4985	5269	0.7133	602	0.031	380	0.6825	977	0.0543	662	-0.3082	5947	0.5696	6067	0.5246	2693	0.2213	2377
BIRC8	0.712	638	0.0359	413	0.4985	3374	0.293	3144	0.2378	5318	0.5016	5301	0.545	2289	0.1761	1922	0.7702	371	0.0157	208	0.5298	2214	0.1686	1865	0.5143	2488	0.201	2167	-0.6006	8931	0.8768	9305	0.4052	3966	0.3528	3745
N4BP2	0.7116	639	0.1093	1220	0.8492	286	0.0442	486	-0.4811	7581	0.6539	6891	0.6531	1137	0.1728	1881	-0.5352	8081	0.6887	7287	0.7456	415	0.0752	850	-0.7436	10143	0.9118	9652	0.703	916	0.138	1500	0.7915	319	0.0583	659
ENAM	0.7115	640	0.036	414	0.6869	1453	0.1137	1212	-0.6965	9845	0.9512	10126	0.7018	737	0.0442	473	0.582	2018	0.1472	1670	0.6205	1381	0.0932	1044	0.5402	2222	0.1721	1900	0.3329	4996	0.4598	4908	0.5744	2144	0.1689	1784
TAF7	0.7112	641	0.0637	701	0.729	1036	0.1039	1106	0.7138	746	0.0698	817	0.6301	1337	0.1356	1477	0.6108	1735	0.1618	1824	-0.5239	7808	0.7316	7697	0.3946	3834	0.3749	3929	0.6067	1915	0.1851	2025	0.5369	2560	0.2514	2679
HOXC9	0.7111	642	0.0637	700	0.8542	262	0.0248	282	0.5646	2258	0.2167	2342	0.4774	3015	0.2921	3101	-0.4688	7375	0.684	7222	-0.6428	9238	0.8688	9184	0.4004	3766	0.3675	3853	0.4954	3228	0.3098	3334	0.4016	4003	0.3857	4103
IL7	0.7111	643	0.0638	702	0.7569	810	0.0842	873	-0.5907	8747	0.8236	8685	0.5388	2351	0.2297	2460	0.446	3468	0.3329	3605	0.2603	4904	0.4686	4996	0.6813	987	0.0871	1029	-0.3889	6688	0.624	6661	0.8442	113	0.0115	125
GPR61	0.7107	644	0.0639	704	0.5431	2946	0.2803	3004	0.3638	4488	0.4338	4602	0.549	2237	0.2198	2371	0.2827	5041	0.485	5142	-0.516	7717	0.7225	7611	0.2936	4819	0.4672	4903	-0.493	7813	0.7261	7695	0.646	1381	0.1381	1466
JMJD1C	0.7107	645	0.0362	417	0.9018	123	0.0051	72	-0.5581	8411	0.8334	8772	0.8372	115	0.0026	29	0.5798	2044	0.1491	1691	0.6912	739	0.0435	498	-0.6837	9704	0.9466	10027	0.4608	3617	0.3139	3373	0.3974	4049	0.3626	3844
PCYOX1L	0.7105	646	0.1974	2232	-0.8641	10451	0.9301	9889	-0.8545	10581	0.944	10047	0.521	2565	0.3757	4000	0.8279	163	0.0807	970	0.9033	19	0.0255	297	0.6148	1544	0.2928	3074	-0.567	8573	0.6526	6923	-0.7086	9773	0.7841	8359
NONO	0.7104	647	0.0642	707	-0.2707	5454	0.5192	5470	0.6803	1059	0.097	1128	0.6586	1091	0.1103	1153	0.5429	2416	0.2312	2517	-0.5076	7599	0.7095	7486	0.774	331	0.0297	372	-0.7921	10410	0.9778	10419	0.7685	430	0.0429	501
TRIM44	0.7103	648	0.0643	709	0.4753	3590	0.3398	3660	0.3442	4685	0.4509	4775	0.325	4686	0.453	4784	0.411	3860	0.3689	3954	0.7053	639	0.0618	702	0.4735	2923	0.2867	3003	-0.5508	8418	0.7827	8273	0.5962	1901	0.1888	2046
TXN2	0.7103	649	0.0364	418	0.3771	4516	0.4116	4383	0.6686	1181	0.0712	839	0.4739	3049	0.2569	2732	0.4634	3249	0.2759	2957	0.4856	2645	0.2165	2324	0.7483	474	0.0196	260	-0.6974	9823	0.9517	10132	0.7764	391	0.0179	225
MICA	0.7101	650	0.0644	711	0.5314	3060	0.2907	3118	-0.4042	6705	0.631	6655	0.6719	980	0.0975	1014	0.5796	2050	0.1932	2149	0.9029	21	0.0013	16	0.6419	1297	0.1221	1370	-0.6333	9241	0.8646	9179	0.5282	2647	0.2606	2744
LINC00467	0.71	651	0.0644	713	-0.7135	9481	0.8877	9406	-0.2861	5625	0.5319	5614	0.4201	3677	0.3549	3778	0.8055	240	0.0197	257	-0.3729	6027	0.565	5994	0.3997	3771	0.3687	3871	0.583	2188	0.2122	2320	0.4828	3119	0.3029	3224
SERPINI1	0.7099	652	0.0645	716	0.8632	228	0.0226	252	0.6231	1640	0.1534	1702	0.6722	977	0.0975	1015	0.4286	3695	0.3504	3778	0.559	1934	0.1891	2053	0.6159	1536	0.1456	1658	-0.6394	9294	0.8703	9241	0.6008	1859	0.1837	1995
ABCD2	0.7097	653	0.0369	422	-0.3916	6336	0.6097	6486	-0.6336	9247	0.9053	9605	0.5777	1941	0.1454	1590	-0.4331	6956	0.6834	7213	0.4032	3632	0.3125	3352	0.4775	2876	0.2431	2593	0.4788	3421	0.2916	3148	0.6047	1806	0.1398	1487
ST13	0.7095	654	0.1112	1244	0.8706	202	0.0325	357	0.713	755	0.1156	1341	0.5471	2262	0.2841	3005	0.7987	265	0.0464	536	-0.7937	10405	0.9508	10088	0.7807	309	0.0551	671	0.7337	677	0.1077	1178	-0.6551	9242	0.804	8547
HSPA4	0.7094	655	0.037	423	-0.6905	9264	0.8985	9525	0.6209	1667	0.1147	1326	0.6968	773	0.0477	496	0.7378	557	0.0266	317	0.7547	360	0.0154	178	0.6358	1360	0.0896	1053	-0.6473	9374	0.9177	9739	-0.4479	7040	0.6806	7280
ORAOV1	0.7094	656	0.0645	714	0.6557	1750	0.1704	1842	-0.5189	8005	0.7484	7885	0.8655	59	0.005	59	0.7237	689	0.0608	725	-0.3707	6003	0.5625	5969	0.6701	1075	0.0968	1117	-0.6655	9557	0.8944	9491	0.4752	3214	0.3106	3298
DEFA5	0.7092	657	0.0646	720	-0.7711	9947	0.9315	9905	-0.5347	8179	0.7643	8042	0.4443	3384	0.3295	3500	0.4687	3197	0.3062	3313	-0.3985	6320	0.5915	6275	0.7203	663	0.059	713	0.437	3888	0.3697	3986	0.7708	422	0.0411	473
NAT8	0.709	658	0.1992	2254	-0.38	6220	0.5262	5552	-0.7418	10141	0.8371	8825	0.7096	679	0.203	2212	0.7508	477	0.1587	1788	-0.5396	7995	0.6084	6461	0.6866	938	0.2246	2412	0.6012	1978	0.3294	3538	0.9025	27	0.0297	350
CHRM2	0.7085	659	0.1998	2257	0.6012	2320	0.331	3564	0.7466	512	0.164	1822	0.5617	2107	0.3475	3695	-0.5143	7864	0.5977	6330	0.4098	3547	0.4384	4676	0.5455	2172	0.3509	3681	0.3905	4389	0.47	5027	-0.7348	9967	0.8152	8652
CCNL2	0.7085	660	0.1998	2256	0.8416	313	0.0935	982	0.738	568	0.1749	1933	-0.5403	8173	0.618	6552	0.9214	20	0.0189	250	-0.7442	10127	0.8388	8842	0.6915	885	0.2199	2365	0.6558	1370	0.2748	2976	-0.8345	10497	0.9179	9765
HAX1	0.7084	661	0.0376	431	-0.333	5840	0.5597	5948	0.3765	4362	0.3912	4175	-0.2853	5502	0.5235	5551	-0.3794	6339	0.6132	6504	0.7388	459	0.0209	246	0.5149	2483	0.2003	2163	-0.3444	6252	0.5986	6400	0.7196	736	0.0428	499
TAZ	0.7082	662	0.0649	725	0.7142	1189	0.1166	1264	0.6278	1590	0.1474	1648	0.6444	1213	0.1241	1322	-0.7007	9827	0.923	9787	0.4838	2658	0.2591	2757	0.6379	1337	0.125	1406	0.6582	1345	0.1308	1421	0.2726	5090	0.484	5148
OSR1	0.7081	663	0.0379	433	0.7563	815	0.0575	615	0.4823	3113	0.2645	2813	0.7744	308	0.0134	157	-0.5011	7724	0.7661	8055	0.6753	857	0.0527	600	0.6539	1195	0.0737	883	0.273	5416	0.5045	5382	0.7114	796	0.0478	543
CXCR1	0.7079	664	0.0649	727	0.4231	4074	0.3881	4141	-0.3502	6150	0.5789	6126	0.7036	723	0.0725	791	0.4453	3476	0.3337	3612	-0.3604	5888	0.5497	5839	0.6504	1227	0.1137	1292	-0.4995	7874	0.7322	7762	0.4473	3517	0.3387	3603
SLC23A1	0.7076	665	0.1124	1253	-0.6505	8879	0.7804	8300	0.6841	1017	0.1442	1624	0.5938	1769	0.2424	2603	0.5882	1951	0.253	2727	0.3941	3742	0.3994	4247	0.7117	744	0.1105	1253	0.5103	3059	0.3435	3703	0.4991	2963	0.3399	3614
DDX43	0.7075	666	0.1125	1255	-0.5546	7914	0.6837	7259	-0.4168	6849	0.5967	6307	0.3087	4826	0.4737	5016	-0.3207	5771	0.5178	5477	0.4468	3077	0.3505	3765	0.285	4886	0.4775	5020	0.3271	5051	0.4836	5164	0.6237	1600	0.2233	2394
FCGR2B	0.7074	667	0.038	438	0.6767	1559	0.1229	1330	0.4173	3867	0.3434	3657	0.5794	1930	0.1436	1575	0.486	3004	0.2484	2685	0.6123	1454	0.0999	1122	0.6385	1332	0.0871	1028	-0.6036	8964	0.8804	9345	-0.464	7217	0.699	7475
RGS13	0.7073	668	0.038	436	-0.6213	8561	0.8372	8857	-0.3617	6254	0.6065	6402	0.3595	4363	0.3943	4192	0.4661	3214	0.2729	2927	0.7487	397	0.0176	205	-0.2877	5408	0.5167	5440	0.4091	4187	0.3753	4043	0.4032	3985	0.356	3776
CHM	0.7073	669	0.0651	728	-0.8482	10399	0.975	10383	0.4007	4073	0.3931	4198	-0.6196	9095	0.8512	8998	0.6651	1202	0.1081	1273	0.7521	382	0.037	432	0.7702	358	0.0313	394	0.6387	1568	0.1511	1640	0.6809	1050	0.1047	1091
UBAP2	0.7073	670	0.1127	1256	0.3667	4605	0.4522	4823	0.714	745	0.1145	1322	0.8408	104	0.0245	277	0.5275	2579	0.3083	3333	0.3759	3957	0.4159	4446	-0.3137	5562	0.5071	5350	0.684	1093	0.1579	1731	0.6551	1296	0.188	2035
MMRN1	0.7073	671	0.0652	732	-0.5812	8174	0.7615	8104	0.5456	2457	0.2381	2532	-0.5138	7899	0.7357	7801	0.8115	219	0.0172	226	0.822	134	0.0113	137	0.6377	1342	0.1254	1410	0.4174	4103	0.3945	4202	-0.4396	6933	0.6422	6866
PLXNB2	0.7073	672	0.038	437	-0.445	6852	0.6621	7065	0.5764	2132	0.158	1763	0.5367	2371	0.1851	2027	-0.3633	6176	0.5952	6308	0.5898	1632	0.1178	1288	-0.3692	6092	0.5947	6242	-0.6536	9445	0.9223	9798	0.5149	2790	0.2316	2472
PRPF6	0.707	673	0.0655	736	-0.4116	6541	0.6121	6512	0.6606	1262	0.1139	1316	0.6655	1029	0.1047	1089	0.6748	1103	0.0987	1137	-0.5736	8445	0.7893	8313	0.7506	459	0.0416	509	0.7001	951	0.0884	980	-0.5357	7965	0.7374	7883
ST3GAL6	0.7067	674	0.0385	443	-0.6526	8900	0.8671	9187	0.4573	3392	0.295	3119	0.5611	2113	0.161	1764	0.4373	3583	0.3077	3326	0.5586	1942	0.1432	1598	0.6217	1480	0.1021	1167	0.4519	3718	0.3238	3476	0.759	479	0.0236	298
KRT23	0.7064	675	0.0388	445	0.382	4469	0.4069	4337	0.2912	5090	0.4734	5023	-0.4802	7521	0.7436	7872	0.4071	3895	0.3448	3714	0.4976	2509	0.2029	2199	-0.3446	5844	0.5673	5971	0.5911	2105	0.1588	1742	-0.5206	7799	0.7614	8117
KCNK10	0.7063	676	0.0389	447	-0.6181	8538	0.8345	8836	0.7399	549	0.0267	320	-0.4333	6989	0.6858	7297	0.7196	713	0.0365	414	-0.3032	5378	0.5094	5420	0.4301	3384	0.2986	3131	0.3654	4691	0.4266	4557	0.5229	2708	0.2231	2390
SLC10A4	0.706	677	0.0658	737	0.5226	3159	0.2982	3201	-0.4288	6987	0.6546	6907	0.4993	2793	0.2698	2866	0.7102	789	0.0712	842	0.7021	656	0.0643	721	0.6154	1540	0.146	1662	-0.5299	8179	0.7618	8052	0.784	364	0.0333	403
RHOT1	0.7057	678	0.0659	748	0.7941	568	0.056	601	-0.4492	7225	0.6758	7126	0.7452	450	0.046	487	0.5623	2220	0.2117	2339	0.4053	3603	0.3454	3721	0.4294	3391	0.3352	3496	-0.4204	7030	0.6538	6937	0.6903	966	0.0947	1000
KCNAB1	0.7057	679	0.0393	448	0.6324	1998	0.1617	1748	0.7018	847	0.0467	560	-0.5619	8447	0.8324	8809	0.5109	2764	0.222	2441	0.6018	1532	0.1075	1194	0.4344	3339	0.2933	3079	0.5414	2699	0.2168	2360	0.757	489	0.0243	303
PDK2	0.7056	680	0.0394	451	0.6817	1513	0.118	1281	0.3252	4849	0.4467	4740	0.4938	2837	0.2352	2520	-0.2809	5488	0.5237	5542	0.8106	155	0.0044	49	0.4448	3225	0.28	2936	-0.2437	5626	0.5322	5667	0.4986	2970	0.2485	2643
HACL1	0.7056	681	0.0394	452	0.7421	934	0.0691	725	0.5075	2837	0.2359	2518	0.7989	227	0.0077	102	0.2322	5239	0.492	5210	0.6184	1406	0.095	1066	0.705	776	0.0408	499	-0.318	6027	0.5767	6141	0.7393	589	0.0324	382
ABCF2	0.7055	682	0.0659	749	-0.5124	7529	0.6968	7412	0.3558	4570	0.4411	4681	0.7788	291	0.0283	327	0.4312	3655	0.3472	3741	-0.4866	7374	0.6865	7249	0.7123	737	0.0641	783	-0.2632	5691	0.5357	5703	0.8045	258	0.0235	297
SNX17	0.7055	683	0.1142	1271	-0.778	9987	0.9	9552	0.5331	2586	0.3131	3318	0.7594	372	0.0705	758	-0.3559	6092	0.5381	5708	0.8562	73	0.0156	183	0.3432	4376	0.4489	4722	0.6274	1693	0.2272	2479	-0.7737	10198	0.9189	9771
FBLN5	0.7054	684	0.0394	449	-0.6324	8679	0.849	8978	0.622	1653	0.1135	1313	0.3281	4654	0.4293	4551	0.5384	2468	0.1895	2113	-0.5521	8167	0.8119	8551	0.7122	738	0.0372	472	-0.3547	6341	0.6093	6510	0.696	918	0.0569	642
AP3M1	0.7054	685	0.0394	450	0.7093	1235	0.0954	1007	0.5037	2877	0.24	2557	0.7056	704	0.0413	439	0.6429	1424	0.0915	1070	0.4447	3101	0.2621	2789	0.5004	2645	0.2166	2333	0.6164	1807	0.1342	1456	0.4787	3172	0.2702	2851
PCGF1	0.7053	686	0.0659	745	0.8674	210	0.0211	239	0.4303	3718	0.3591	3821	0.6043	1633	0.164	1793	-0.5392	8124	0.7609	7995	0.7232	547	0.0514	576	0.7855	278	0.0257	316	-0.4315	7138	0.6636	7048	0.6994	884	0.0871	925
NDUFS1	0.7052	687	0.0394	453	-0.5647	8006	0.778	8273	0.6358	1512	0.101	1171	0.7262	562	0.0314	362	-0.3875	6430	0.6248	6617	0.4712	2792	0.2331	2488	0.7993	224	0.0071	100	0.6018	1971	0.1493	1626	0.4243	3767	0.3294	3526
PHF20	0.705	688	0.0662	751	-0.8023	10127	0.953	10147	-0.3315	5984	0.5617	5944	0.4148	3742	0.3597	3837	0.8355	140	0.0106	152	-0.5433	8047	0.7536	7899	0.6943	854	0.0759	907	0.6332	1629	0.1572	1719	-0.4829	7428	0.6856	7329
KCNB1	0.7049	689	0.0663	753	-0.4549	6958	0.6476	6893	0.7973	249	0.0224	277	0.2646	5120	0.4906	5190	0.6708	1150	0.1029	1196	-0.7308	10044	0.9449	10009	0.5881	1781	0.1721	1899	0.6137	1836	0.1777	1951	0.5877	1983	0.1975	2126
EBI3	0.7047	690	0.1148	1281	-0.5164	7560	0.6509	6927	0.5075	2836	0.3355	3570	0.6685	1001	0.156	1704	0.3586	4416	0.4481	4746	-0.4054	6420	0.5553	5900	0.7912	258	0.0487	588	0.8303	154	0.0339	382	-0.5719	8363	0.7132	7623
PRPF38B	0.7045	691	0.0397	454	0.2848	5164	0.4801	5108	0.3508	4627	0.4216	4485	0.5695	2036	0.1539	1689	0.2481	5209	0.4875	5164	0.7454	418	0.0183	215	0.6409	1304	0.0853	1004	0.4786	3426	0.2918	3150	0.6106	1727	0.1347	1423
FXR2	0.7044	692	0.0398	455	-0.4821	7230	0.7003	7449	0.7675	383	0.0158	197	0.7975	230	0.0077	101	0.5224	2636	0.2075	2304	0.3808	3911	0.3401	3671	0.7667	372	0.0149	201	-0.5467	8373	0.8233	8754	0.3465	4546	0.4152	4390
EEF1E1	0.7041	693	0.2046	2300	-0.3986	6408	0.5339	5646	0.7045	820	0.2119	2299	-0.683	9720	0.7671	8101	0.6588	1255	0.2595	2797	0.6993	678	0.2058	2232	0.7935	248	0.1089	1234	-0.6601	9510	0.7441	7865	0.7599	473	0.1555	1642
ZNF180	0.7039	694	0.1158	1294	0.5457	2922	0.3219	3466	0.3889	4232	0.434	4607	0.7473	439	0.0801	866	0.7763	347	0.061	729	0.5285	2229	0.2819	3018	0.5335	2290	0.287	3004	-0.5391	8277	0.7035	7481	0.7072	826	0.1286	1358
EIF6	0.7039	695	0.0401	463	-0.4946	7340	0.7127	7579	0.3981	4115	0.3676	3913	0.6491	1169	0.0815	877	0.7654	398	0.0165	216	0.6308	1269	0.085	952	0.7023	801	0.0425	520	0.7578	500	0.0239	259	-0.5196	7792	0.7604	8108
HTR7	0.7038	696	0.1159	1295	0.9521	34	0.0044	62	0.2644	5234	0.4979	5257	0.6099	1575	0.2236	2404	0.4059	3907	0.4116	4356	0.3395	4323	0.4403	4699	-0.6003	8850	0.7573	8001	0.6596	1333	0.1896	2079	0.7117	795	0.1243	1319
AXIN2	0.7037	697	0.0673	761	0.5201	3187	0.3002	3227	0.4897	3038	0.2969	3133	0.3456	4506	0.4357	4610	0.4463	3461	0.3328	3601	0.7366	469	0.0449	513	0.7287	600	0.0535	652	0.3906	4385	0.4244	4536	-0.778	10219	0.9605	10205
ZFP1	0.7037	698	0.0401	464	0.4825	3532	0.3095	3316	0.665	1222	0.075	889	0.6452	1204	0.0848	904	0.491	2951	0.2434	2629	0.6714	901	0.0551	633	0.6573	1176	0.0713	860	-0.5029	7910	0.7817	8256	-0.4021	6521	0.6263	6683
PPM1D	0.7036	699	0.0402	466	0.7787	660	0.0441	484	-0.5255	8078	0.8012	8447	0.6763	944	0.0621	659	0.7247	679	0.0341	392	0.5741	1799	0.1309	1449	0.7456	491	0.0209	274	-0.4581	7429	0.7337	7773	0.6675	1169	0.0825	873
ZNF25	0.7035	700	0.0402	465	0.7174	1149	0.0891	928	-0.4588	7336	0.7267	7656	0.4684	3109	0.2634	2802	0.7009	880	0.0471	549	0.2475	4958	0.4571	4874	0.6911	893	0.0495	598	-0.6233	9157	0.8978	9532	0.3196	4802	0.4388	4661
SOX13	0.7033	701	0.1164	1305	-0.6353	8711	0.7658	8151	-0.4762	7530	0.6492	6843	0.831	136	0.0286	330	-0.608	8895	0.7679	8074	0.8934	28	0.0058	66	-0.6001	8845	0.7568	7992	0.5543	2552	0.306	3278	-0.7136	9820	0.8636	9156
TAF8	0.7032	702	0.1164	1306	-0.5086	7487	0.6444	6861	0.9297	17	0.0029	48	0.7426	465	0.0843	899	-0.4128	6714	0.5834	6160	-0.4451	6889	0.5923	6285	0.7408	512	0.0833	987	0.2632	5458	0.5055	5393	-0.6269	8944	0.7742	8248
C14orf166	0.7031	703	0.0406	469	-0.3886	6305	0.6069	6459	0.5898	1981	0.1453	1635	0.4026	3885	0.3445	3661	-0.4627	7305	0.7205	7611	-0.4854	7360	0.7286	7669	0.4133	3590	0.3193	3343	-0.2822	5779	0.551	5866	0.6843	1015	0.0672	735
PTK7	0.703	704	0.0679	772	-0.4199	6629	0.6195	6608	0.7227	680	0.0636	747	0.5265	2492	0.241	2584	0.2316	5240	0.5015	5296	-0.4431	6866	0.6396	6775	0.7184	686	0.0604	730	0.446	3772	0.3603	3885	-0.3438	5920	0.5508	5872
TIMM8A	0.703	705	0.0679	773	0.3423	4809	0.4545	4854	0.3395	4730	0.4547	4814	0.7594	373	0.0389	420	0.3942	4029	0.3906	4158	-0.451	6949	0.6479	6848	0.5804	1868	0.1803	1972	-0.5667	8569	0.8012	8463	0.6836	1022	0.102	1065
PCDHB14	0.7029	706	0.0406	468	0.5714	2629	0.222	2347	-0.4487	7224	0.7138	7520	0.5741	1981	0.1495	1634	0.6983	905	0.049	569	0.4896	2596	0.2117	2277	-0.404	6509	0.6383	6747	-0.2116	5583	0.5254	5595	0.6229	1606	0.1225	1301
PDE6A	0.7028	707	0.2063	2315	0.6832	1496	0.2527	2720	-0.6314	9223	0.7148	7525	0.5922	1788	0.3193	3383	-0.8294	10524	0.9235	9793	-0.6675	9483	0.7457	7824	0.6301	1417	0.28	2935	0.9037	38	0.029	321	-0.3807	6294	0.5265	5612
CLPP	0.7026	708	0.0682	775	0.6974	1353	0.1309	1414	-0.7455	10162	0.9518	10137	0.9239	16	0.0002	7	0.778	339	0.0302	354	0.4797	2700	0.2639	2813	-0.3292	5701	0.5371	5651	0.7948	291	0.0274	304	-0.4447	6992	0.6462	6918
POC1A	0.7024	709	0.0411	472	-0.6179	8535	0.8341	8830	0.218	5348	0.5055	5335	0.3894	4033	0.3592	3830	-0.2992	5595	0.5366	5689	0.7908	207	0.0076	87	0.6076	1617	0.1125	1271	-0.3008	5892	0.5634	6005	-0.3476	5963	0.5682	6061
MSTN	0.7023	710	0.0685	776	-0.2381	5371	0.5105	5383	-0.6643	9573	0.8938	9447	0.7272	553	0.0567	595	0.7661	393	0.036	409	0.3912	3775	0.3611	3883	0.421	3494	0.3442	3600	-0.6036	8966	0.8384	8891	-0.3398	5885	0.5481	5838
UBA7	0.7023	711	0.0685	778	-0.6296	8648	0.8093	8592	0.537	2540	0.248	2650	0.253	5154	0.4946	5221	0.6375	1476	0.1333	1539	0.6208	1376	0.1315	1455	0.33	4521	0.4394	4622	-0.5049	7933	0.7384	7801	0.6089	1752	0.1757	1877
PLA1A	0.7022	712	0.0685	777	0.7169	1157	0.1144	1230	0.7419	536	0.0512	614	0.8138	177	0.0158	181	0.5361	2488	0.2382	2584	0.3361	4361	0.4196	4479	0.6928	869	0.0775	927	-0.7949	10418	0.9788	10428	0.5872	1989	0.198	2130
TSLP	0.7022	713	0.0412	473	0.6298	2023	0.1645	1775	-0.6604	9540	0.9282	9876	0.6768	939	0.0617	655	-0.4916	7610	0.7555	7949	0.5607	1910	0.1414	1578	0.4104	3621	0.3225	3369	0.6329	1634	0.1178	1290	0.6045	1811	0.1402	1489
IRAK1BP1	0.7021	714	0.0413	474	0.7302	1027	0.0781	823	-0.5349	8180	0.8097	8550	0.6436	1220	0.0858	916	0.6559	1288	0.079	949	0.3298	4410	0.4004	4258	0.502	2626	0.2148	2312	0.3442	4889	0.4479	4777	0.5314	2612	0.2132	2281
PNRC1	0.702	715	0.0414	476	-0.7353	9655	0.9304	9893	0.7998	241	0.0087	121	-0.6347	9247	0.91	9601	0.5012	2846	0.2336	2532	0.6012	1536	0.1078	1198	0.7993	223	0.0071	99	0.3887	4414	0.401	4267	0.7386	598	0.0328	393
CSNK1A1L	0.7017	716	0.0417	478	0.6946	1381	0.1068	1141	-0.4072	6738	0.663	6978	0.6026	1659	0.1226	1305	0.3341	4667	0.4278	4535	0.4131	3506	0.2991	3226	0.6117	1575	0.1096	1240	-0.3675	6475	0.6239	6659	0.6257	1573	0.1194	1258
FLT1	0.7017	717	0.0686	783	0.8344	341	0.0343	383	0.59	1979	0.1886	2068	0.2422	5185	0.4976	5252	-0.5496	8235	0.7731	8142	0.4558	2973	0.2906	3121	0.4376	3301	0.327	3411	-0.507	7955	0.7409	7832	0.5922	1943	0.1927	2087
MYLK	0.7016	718	0.1181	1326	0.7931	576	0.0839	872	-0.4065	6728	0.5892	6225	0.7383	490	0.0891	938	0.7446	511	0.0867	1022	0.9299	11	0.0025	31	-0.5336	8044	0.6794	7184	-0.9864	10670	0.9999	10670	0.5126	2821	0.3293	3524
GTF3C5	0.7015	719	0.2077	2328	0.6716	1607	0.2649	2843	0.87	76	0.0472	564	0.2882	4982	0.4926	5206	0.6965	925	0.2194	2414	0.6731	883	0.234	2501	0.9545	3	0.0056	82	0.5689	2356	0.3567	3857	0.7108	800	0.2085	2228
VSNL1	0.7013	720	0.0419	481	0.6332	1992	0.1613	1745	0.4427	3565	0.3134	3324	0.6272	1368	0.1018	1050	0.2831	5038	0.4694	4963	0.7323	492	0.0241	284	0.3746	4061	0.3656	3835	-0.3556	6356	0.6104	6525	0.4939	3026	0.2533	2688
DLGAP1	0.701	721	0.0423	483	0.6096	2222	0.1843	1980	0.6186	1689	0.1164	1351	-0.3824	6373	0.6195	6568	0.3421	4586	0.4193	4451	0.4588	2942	0.2463	2618	0.5174	2462	0.1976	2140	0.4131	4149	0.3715	4001	0.4403	3584	0.3132	3333
TACR3	0.7009	722	0.0692	784	0.5945	2393	0.2321	2483	-0.4153	6834	0.6414	6762	0.5896	1821	0.1782	1946	-0.3967	6547	0.6123	6493	0.3303	4405	0.4254	4533	-0.2921	5425	0.5149	5424	0.6089	1893	0.1835	2006	0.5753	2127	0.2093	2240
RAB8A	0.7009	723	0.0692	785	0.6988	1344	0.1297	1406	0.6035	1842	0.1725	1907	0.3424	4540	0.4387	4643	0.7143	756	0.0677	807	0.7705	282	0.0285	334	0.727	614	0.0548	665	-0.5643	8549	0.7981	8433	0.5517	2412	0.2359	2523
PEPD	0.7007	724	0.2089	2339	-0.6501	8873	0.716	7613	0.7445	524	0.1666	1845	0.8643	62	0.0517	539	0.4523	3385	0.4248	4514	0.5195	2314	0.3636	3906	0.4085	3647	0.4441	4673	0.2919	5310	0.5009	5355	-0.5491	8115	0.6263	6681
ARPM1	0.7003	725	0.0698	789	0.6767	1558	0.1525	1641	0.6219	1654	0.1552	1721	0.4532	3288	0.3199	3393	-0.4996	7707	0.7176	7581	0.5846	1683	0.1648	1822	0.6296	1418	0.1314	1481	0.9113	27	0.001	20	-0.5276	7873	0.7296	7803
AGAP3	0.7002	726	0.0426	486	-0.8749	10482	0.9915	10558	0.6611	1258	0.079	937	0.6929	797	0.0497	517	-0.5662	8418	0.8344	8790	0.7467	408	0.0182	214	0.5549	2083	0.1585	1774	-0.4881	7758	0.7653	8088	0.3966	4063	0.3629	3859
HSD17B6	0.7002	727	0.0426	485	-0.2878	5537	0.5307	5606	-0.399	6641	0.6525	6876	0.4653	3148	0.2671	2835	0.5211	2651	0.2087	2317	0.7837	230	0.009	103	0.4892	2763	0.2298	2462	-0.3194	6038	0.578	6155	0.7996	278	0.0116	129
LAMTOR3	0.7	728	0.1196	1343	0.633	1995	0.2415	2608	-0.6066	8922	0.7717	8111	-0.5805	8658	0.7379	7831	-0.5022	7740	0.6571	6947	0.6311	1264	0.1841	2014	0.5746	1929	0.2529	2691	0.5585	2493	0.3023	3238	0.6618	1225	0.1781	1911
GTF2H1	0.6999	729	0.0427	487	0.5147	3232	0.2784	2987	-0.4227	6919	0.6811	7179	0.513	2647	0.2116	2292	-0.4122	6709	0.6583	6957	0.3046	4649	0.423	4508	0.8162	170	0.0046	71	-0.5947	8856	0.8711	9245	0.793	309	0.013	155
RAD23A	0.6997	730	0.0705	793	-0.7476	9763	0.9133	9717	0.3337	4788	0.4591	4858	0.7448	453	0.0463	489	-0.3355	5898	0.5525	5858	0.4699	2806	0.2754	2943	0.4129	3595	0.3532	3694	0.668	1248	0.1208	1328	0.668	1163	0.1148	1209
EXOSC10	0.6997	731	0.0705	796	0.3608	4657	0.4417	4710	0.5707	2194	0.2081	2269	0.4668	3127	0.3022	3215	-0.4258	6863	0.6415	6799	0.7021	657	0.0643	723	0.6948	846	0.0757	903	0.4265	4009	0.3832	4105	-0.3527	6007	0.5595	5971
UQCRC2	0.6996	732	0.0428	488	0.3343	4853	0.447	4771	0.681	1048	0.0612	724	0.491	2861	0.2373	2543	0.5378	2473	0.1898	2117	0.3922	3766	0.3274	3510	0.3274	4539	0.4206	4408	0.3005	5248	0.4862	5198	0.6952	929	0.0576	651
AUP1	0.6995	733	0.0705	794	0.3862	4436	0.4219	4512	-0.326	5927	0.5575	5897	0.6981	761	0.0762	830	0.6226	1628	0.1488	1689	0.6984	685	0.0672	752	0.4605	3053	0.2983	3130	-0.6213	9139	0.8544	9059	0.4146	3865	0.369	3923
UGT2B10	0.6991	734	0.0708	799	-0.4926	7322	0.6804	7230	0.7331	602	0.0562	671	0.5941	1764	0.1742	1902	-0.4806	7495	0.6969	7371	0.8308	112	0.0092	104	0.5749	1927	0.1853	2023	0.523	2921	0.2807	3038	-0.6383	9057	0.8473	8993
GRHL3	0.6991	735	0.043	490	0.3932	4360	0.3961	4236	0.8327	150	0.004	60	-0.5549	8350	0.8249	8744	0.6266	1580	0.1057	1240	0.5587	1941	0.143	1597	0.3032	4745	0.4415	4644	0.2399	5520	0.5169	5520	0.5114	2839	0.2349	2512
LEPROT	0.6988	736	0.0711	800	0.7554	828	0.085	886	0.7232	677	0.0635	744	0.8181	166	0.0145	168	0.2728	5087	0.4897	5187	-0.5527	8177	0.7653	8021	0.6843	964	0.0844	997	0.457	3659	0.3493	3775	-0.4186	6708	0.6226	6632
ACOT12	0.6988	737	0.0432	492	-0.3263	5781	0.5551	5873	0.4101	3958	0.3539	3756	0.5741	1980	0.1495	1636	0.5864	1975	0.1425	1621	0.8354	101	0.0021	28	-0.4035	6499	0.6376	6744	-0.3328	6148	0.5896	6286	-0.3938	6435	0.6168	6566
CD248	0.6987	738	0.0711	801	0.3321	4864	0.4617	4914	-0.6366	9283	0.8664	9151	0.7211	599	0.06	641	0.7298	620	0.0572	673	0.5952	1584	0.1538	1702	-0.5165	7846	0.7317	7737	-0.6094	9016	0.8437	8954	0.7371	612	0.0615	688
HNRNPH3	0.6987	739	0.0711	802	-0.6414	8789	0.8208	8706	-0.5645	8489	0.797	8396	0.6138	1537	0.153	1683	-0.4488	7146	0.6645	7018	0.6006	1543	0.1493	1662	0.5749	1924	0.1852	2022	0.7019	927	0.0868	964	0.7238	700	0.0703	766
HLA-DMB	0.6986	740	0.0713	804	-0.4717	7130	0.6613	7057	0.515	2769	0.2696	2865	0.6016	1669	0.1668	1822	0.4974	2889	0.2785	2981	0.5485	2047	0.198	2144	-0.6017	8863	0.8281	8740	-0.2925	5839	0.5462	5811	-0.4104	6619	0.6152	6551
ATXN7	0.6985	741	0.0433	496	-0.9426	10637	0.9988	10656	0.7932	265	0.0103	139	0.3328	4615	0.4247	4508	-0.4945	7640	0.7588	7979	0.7057	635	0.0347	418	0.5135	2502	0.2022	2175	0.6846	1089	0.0707	792	0.5657	2257	0.1772	1896
YTHDF1	0.6978	742	0.0719	807	0.5961	2370	0.2302	2464	0.3943	4156	0.4003	4269	0.4459	3367	0.3275	3485	-0.2804	5485	0.5196	5492	-0.4693	7190	0.6675	7047	0.5983	1702	0.1619	1810	0.5916	2098	0.2037	2239	0.5206	2732	0.2662	2803
LDHAL6B	0.6977	743	0.044	501	0.4254	4057	0.3652	3900	0.5077	2831	0.2355	2510	0.3811	4122	0.3692	3935	0.5569	2273	0.1706	1904	0.3181	4534	0.4117	4402	0.7702	357	0.0138	188	-0.6046	8975	0.8813	9352	0.583	2039	0.1612	1706
TAT	0.6977	744	0.1219	1364	-0.4638	7046	0.6137	6534	0.7729	361	0.0645	758	0.2982	4917	0.4775	5059	0.8813	52	0.0103	148	-0.3044	5388	0.4905	5205	0.5518	2111	0.2729	2870	-0.6806	9698	0.8471	8979	0.3514	4502	0.452	4795
CX3CR1	0.6977	745	0.0441	502	-0.2991	5603	0.5366	5670	-0.3858	6496	0.6373	6709	0.4251	3622	0.3167	3351	0.6843	1016	0.0576	677	0.6489	1089	0.0708	797	0.8262	148	0.0034	61	-0.4635	7481	0.7396	7814	-0.3654	6129	0.5848	6242
RPTOR	0.6976	746	0.0244	285	0.7223	1098	0.0648	683	0.6734	1130	0.0454	542	0.4259	3607	0.28	2968	0.2712	5101	0.4745	5010	0.591	1622	0.0866	976	0.5162	2474	0.1621	1814	0.3304	5022	0.4522	4836	-0.329	5792	0.568	6060
CAMK4	0.6974	747	0.0057	76	0.5328	3050	0.1672	1799	0.2881	5107	0.4333	4592	0.3769	4167	0.2713	2875	0.4734	3149	0.1408	1600	0.6302	1273	0.0163	191	0.5742	1934	0.0448	542	0.4508	3730	0.2041	2248	0.3186	4810	0.3776	4006
PON3	0.6964	748	0.0734	818	0.9637	20	0.0007	12	0.6219	1655	0.1552	1720	-0.5066	7815	0.727	7722	0.4761	3116	0.2991	3220	-0.5124	7666	0.7169	7558	-0.6046	8894	0.8317	8784	0.5883	2137	0.207	2275	-0.3611	6088	0.5675	6051
APRT	0.6963	749	0.0735	821	0.5812	2519	0.2444	2635	0.7676	382	0.0362	436	0.7214	596	0.0598	635	-0.3415	5954	0.5572	5900	-0.4359	6777	0.632	6699	0.6712	1066	0.0955	1109	0.7052	896	0.0842	930	-0.4911	7523	0.6924	7405
SLC12A3	0.6959	750	0.0737	828	-0.8185	10239	0.9622	10252	-0.3287	5956	0.5594	5913	0.5913	1798	0.1768	1925	0.6201	1645	0.1518	1716	0.413	3508	0.3378	3643	0.3051	4732	0.4588	4822	0.466	3543	0.3398	3660	0.7369	615	0.0617	690
KCNA5	0.6958	751	0.0737	825	0.6186	2141	0.208	2194	0.3417	4704	0.4535	4798	-0.4622	7318	0.6795	7233	0.7074	812	0.073	867	0.7418	439	0.0426	484	-0.4452	7028	0.6532	6919	0.3213	5100	0.4849	5176	0.6091	1749	0.1755	1871
HES6	0.6957	752	0.0457	511	-0.5303	7683	0.7445	7923	0.516	2762	0.2256	2421	0.7191	615	0.0352	395	0.6985	903	0.0489	568	-0.559	8261	0.8192	8635	0.6934	865	0.0486	579	0.5916	2097	0.1583	1736	0.2845	5037	0.4635	4939
AKNA	0.6956	753	0.0738	829	0.8303	362	0.0363	404	-0.5667	8516	0.7989	8418	0.6019	1664	0.1665	1819	-0.7223	9997	0.9378	9957	0.8028	175	0.0168	198	0.4954	2702	0.2624	2767	0.2999	5258	0.5001	5341	0.828	163	0.0163	202
EMR2	0.6955	754	0.1238	1378	0.9181	90	0.0127	156	0.6104	1777	0.2328	2486	0.6827	890	0.1411	1541	-0.6191	9001	0.7809	8213	0.6157	1420	0.202	2184	0.5699	1966	0.2579	2725	0.6229	1736	0.2333	2541	-0.8199	10446	0.9557	10172
MBD3L1	0.6952	755	0.1238	1379	-0.8075	10159	0.9263	9852	-0.5623	8463	0.7261	7647	0.2903	4967	0.4816	5088	0.8325	149	0.0295	344	0.3203	4510	0.4522	4817	0.7237	639	0.1011	1159	-0.5748	8649	0.7381	7798	0.5255	2684	0.3183	3406
SOX14	0.6952	756	0.074	830	0.3744	4539	0.4313	4594	0.8731	73	0.005	71	0.5921	1791	0.1755	1915	-0.557	8312	0.7802	8205	-0.3517	5792	0.542	5766	-0.5666	8455	0.788	8324	0.8702	77	0.006	56	-0.4661	7237	0.6679	7152
KIAA0494	0.6951	757	0.046	513	0.5528	2846	0.2403	2595	0.5515	2399	0.1832	2012	0.2586	5143	0.4784	5073	0.4154	3815	0.3334	3609	0.575	1794	0.1304	1444	0.364	4169	0.3775	3960	0.3667	4670	0.4243	4535	-0.4452	7001	0.6774	7254
METAP2	0.6949	758	0.074	831	-0.6233	8587	0.8042	8543	0.7305	619	0.0573	682	-0.295	5572	0.5249	5567	0.5912	1924	0.1805	2024	-0.6091	8853	0.8306	8749	0.7311	577	0.0517	628	-0.3837	6651	0.6194	6610	0.6641	1203	0.1188	1248
HOXC5	0.6949	759	0.0462	517	0.7162	1166	0.0904	942	0.4657	3292	0.2845	3004	0.5933	1775	0.1312	1414	0.5353	2490	0.1926	2135	0.5505	2025	0.1498	1664	0.8356	121	0.0026	49	0.6887	1047	0.0672	748	0.5351	2580	0.2091	2239
BRPF3	0.6948	760	0.0462	515	-0.6471	8839	0.8629	9136	-0.456	7300	0.7235	7615	0.6692	997	0.0676	713	0.3697	4299	0.3882	4128	0.5141	2365	0.1859	2024	0.5276	2358	0.1882	2051	-0.3479	6291	0.6024	6440	-0.3568	6049	0.5758	6160
FZD4	0.6948	761	0.0741	833	0.7244	1078	0.1074	1150	-0.7434	10151	0.951	10125	0.4439	3389	0.3301	3508	0.7102	788	0.0712	843	0.7614	335	0.0325	393	0.6879	923	0.0816	970	-0.7195	9984	0.9356	9936	0.5822	2045	0.2024	2176
HLA-DRB3	0.6947	762	0.2147	2393	0.6997	1338	0.238	2563	0.5786	2095	0.3423	3646	-0.5478	8259	0.6244	6622	0.8247	173	0.0832	993	-0.4601	7067	0.5534	5876	0.6171	1526	0.2904	3046	0.8349	142	0.0806	888	-0.8225	10453	0.9083	9658
POP7	0.6945	763	0.0462	516	0.8766	193	0.0092	116	-0.4633	7383	0.7333	7720	0.6556	1116	0.0758	823	-0.391	6476	0.6299	6661	0.6479	1099	0.0714	810	0.5661	1999	0.1484	1685	0.3521	4826	0.441	4698	0.3892	4150	0.3716	3942
TRO	0.6945	764	0.0741	832	0.9189	88	0.0064	88	0.3507	4628	0.4452	4726	-0.3037	5637	0.529	5605	0.6502	1353	0.1227	1426	-0.3409	5681	0.5318	5648	0.4744	2907	0.2859	2988	-0.4086	6911	0.6425	6835	-0.6778	9455	0.8845	9379
PTPRQ	0.6943	765	0.2149	2396	0.7912	591	0.1418	1524	-0.7076	9930	0.7952	8367	0.6808	911	0.2336	2498	0.7499	489	0.1594	1793	-0.6498	9311	0.7252	7640	0.7267	615	0.1815	1986	-0.705	9873	0.7924	8373	0.6941	940	0.2264	2427
EHD4	0.6941	766	0.0743	837	0.4877	3484	0.3281	3533	0.3155	4933	0.4729	5015	0.3531	4441	0.4288	4543	0.6396	1451	0.1309	1515	0.6942	709	0.0694	778	-0.5379	8090	0.7551	7978	0.7468	568	0.0553	616	0.475	3219	0.3106	3302
TAS1R2	0.6939	767	0.0743	836	0.4917	3446	0.3246	3494	0.6873	973	0.089	1044	0.8542	81	0.0067	77	-0.5333	8066	0.7536	7930	0.4716	2784	0.2735	2923	0.2746	4945	0.4778	5025	-0.7517	10204	0.9558	10178	0.6046	1808	0.1802	1944
OGFOD2	0.6939	768	0.0468	519	0.5623	2739	0.2308	2471	0.3097	4975	0.4609	4876	0.6678	1010	0.0686	728	0.7497	491	0.021	272	0.3666	4061	0.3572	3840	-0.5516	8251	0.8171	8621	0.4673	3532	0.3057	3273	-0.4047	6554	0.6288	6715
GALNT10	0.6936	769	0.047	520	-0.4227	6658	0.6402	6825	-0.4412	7132	0.7045	7420	0.2621	5131	0.4769	5051	0.4032	3939	0.3491	3768	0.2984	4703	0.4271	4561	0.7236	641	0.0311	391	0.6936	1004	0.0632	709	0.4395	3592	0.3137	3344
MEST	0.6936	770	0.1248	1389	0.3831	4460	0.4425	4717	-0.6494	9409	0.8153	8603	0.4161	3730	0.3996	4248	0.822	185	0.0337	387	-0.3744	6046	0.5307	5635	0.6905	897	0.1307	1472	0.4026	4258	0.4334	4625	-0.521	7804	0.6674	7145
AASDHPPT	0.6935	771	0.0471	521	0.5536	2839	0.2399	2590	0.4015	4062	0.3638	3869	0.5748	1969	0.1481	1622	0.6747	1105	0.0665	784	0.5869	1651	0.1196	1305	0.5845	1822	0.1331	1501	0.3167	5139	0.4731	5062	-0.2364	5294	0.4967	5294
TNFRSF17	0.6934	772	0.0472	522	-0.3785	6206	0.5965	6344	0.3245	4852	0.4474	4746	-0.5926	8814	0.8655	9171	-0.2679	5425	0.5147	5446	-0.3431	5699	0.5493	5828	0.6244	1454	0.0993	1140	0.6404	1546	0.1095	1197	0.7619	461	0.0223	279
GALNT14	0.6934	773	0.2155	2400	0.4815	3544	0.4146	4417	0.399	4099	0.4623	4891	0.6221	1439	0.2926	3104	0.7863	313	0.1225	1424	-0.5898	8631	0.6576	6950	-0.5441	8175	0.6161	6485	0.6865	1062	0.2411	2621	-0.4568	7147	0.5675	6052
TAS2R60	0.6934	774	0.0473	524	-0.55	7875	0.763	8121	0.5675	2228	0.1665	1843	-0.6129	9024	0.8874	9387	0.6869	1001	0.0553	654	0.6458	1112	0.0728	821	0.5375	2247	0.176	1934	0.3024	5234	0.485	5180	0.759	480	0.0236	299
ZNF324	0.6934	775	0.1249	1391	0.5544	2827	0.3149	3378	-0.5165	7984	0.6838	7209	0.8377	113	0.0262	305	0.3437	4568	0.4579	4843	0.6617	973	0.1513	1673	0.5789	1883	0.2488	2648	-0.3182	6029	0.532	5666	-0.3164	5685	0.5131	5468
UBE2I	0.6934	776	0.1249	1390	0.8906	152	0.0221	247	0.3723	4406	0.4461	4733	0.8513	85	0.0193	225	-0.3316	5860	0.5228	5535	-0.2664	5159	0.4799	5104	0.9235	11	0.0027	50	0.5765	2277	0.2817	3049	-0.3444	5925	0.5288	5627
ARHGEF15	0.6933	777	0.0473	526	0.3174	4973	0.4598	4897	-0.4911	7692	0.7638	8035	0.6049	1625	0.1205	1275	0.718	728	0.0376	425	0.3525	4199	0.3739	4018	0.534	2285	0.1812	1983	-0.3378	6189	0.5936	6330	0.283	5048	0.4641	4946
CLCA2	0.6929	778	0.0473	527	0.6926	1399	0.1086	1163	-0.3246	5916	0.5697	6026	0.4857	2910	0.2438	2614	0.5775	2071	0.1509	1711	0.7448	423	0.0185	220	-0.2623	5258	0.5007	5265	-0.5105	7987	0.7899	8344	-0.8456	10524	0.9963	10624
WNT4	0.6928	779	0.1256	1396	0.5236	3147	0.3374	3642	0.7471	509	0.086	1020	0.7148	647	0.1097	1143	0.7142	757	0.1127	1321	0.6819	804	0.132	1457	0.8935	29	0.007	95	-0.666	9561	0.8336	8846	0.6319	1524	0.2144	2294
HIBADH	0.6928	780	0.0473	525	-0.4642	7049	0.6823	7250	-0.43	7002	0.6897	7264	0.4884	2883	0.2399	2571	0.5346	2502	0.1938	2157	-0.4498	6935	0.6854	7230	0.5585	2056	0.1554	1741	0.6827	1103	0.0724	799	0.4691	3290	0.2816	2977
POLD1	0.6926	781	0.2165	2409	-0.8631	10445	0.9291	9883	0.6472	1398	0.2765	2926	-0.4084	6685	0.5365	5683	0.9284	18	0.0155	207	0.6837	788	0.2233	2394	0.577	1904	0.3255	3400	-0.3467	6275	0.5206	5552	0.54	2536	0.3738	3970
MS4A6E	0.6924	782	0.0759	848	-0.7922	10070	0.9464	10074	0.5256	2659	0.2594	2759	0.6206	1455	0.1455	1591	0.8213	186	0.0139	188	0.3643	4088	0.3913	4181	0.2721	4957	0.479	5042	0.2264	5547	0.5257	5605	-0.3977	6473	0.603	6427
RELB	0.6924	783	0.0759	845	0.7677	742	0.076	802	0.5778	2110	0.2007	2191	0.3773	4162	0.4047	4296	0.4536	3375	0.3249	3529	0.6406	1166	0.1137	1255	0.4503	3155	0.31	3238	0.6952	990	0.0936	1027	0.5022	2934	0.2845	3023
PCDHA4	0.6924	784	0.0759	846	-0.3333	5843	0.5489	5795	-0.4768	7536	0.7039	7414	-0.2376	5300	0.5041	5331	0.9037	31	0.0012	28	0.6953	702	0.0689	772	-0.7397	10116	0.9524	10114	0.5267	2883	0.2756	2984	0.3751	4297	0.4135	4373
APOLD1	0.6923	785	0.2168	2412	-0.3806	6225	0.5265	5554	0.5088	2821	0.3994	4261	-0.6162	9054	0.6913	7348	-0.3674	6212	0.5198	5495	0.7879	217	0.111	1225	0.436	3315	0.427	4472	0.6908	1025	0.236	2567	-0.7404	9999	0.8204	8706
PIK3R2	0.692	786	0.0761	849	-0.441	6814	0.6367	6787	0.67	1168	0.1063	1234	0.5899	1816	0.1778	1940	-0.3625	6171	0.5795	6115	-0.4369	6791	0.6326	6705	0.7596	416	0.037	469	0.6305	1663	0.1596	1750	0.805	256	0.0234	294
RDH11	0.692	787	0.0477	529	-0.8748	10481	0.9915	10557	-0.5773	8620	0.8515	8980	0.6363	1280	0.0937	978	0.2477	5210	0.4875	5163	0.567	1856	0.1362	1509	0.646	1267	0.0804	952	0.3522	4824	0.4409	4694	0.3889	4156	0.3719	3946
PLCE1	0.6919	788	0.0477	530	-0.6373	8740	0.8536	9030	-0.301	5722	0.5504	5822	0.8005	220	0.0076	97	-0.3095	5668	0.5452	5776	0.4327	3250	0.2761	2956	-0.4005	6467	0.6336	6704	0.3332	4994	0.4594	4906	0.4286	3723	0.3263	3489
CCND2	0.6918	789	0.0478	531	0.7325	1009	0.0771	812	0.3744	4381	0.394	4207	0.6222	1436	0.106	1104	0.7034	849	0.0458	527	0.4381	3182	0.2693	2870	0.3995	3776	0.3367	3510	-0.7492	10182	0.9766	10399	-0.4093	6608	0.6348	6789
SENP8	0.6918	790	0.0478	532	0.7358	985	0.0746	781	0.4905	3029	0.2541	2717	0.596	1737	0.1287	1384	0.6666	1184	0.0718	851	0.8371	99	0.0018	23	0.5762	1913	0.1398	1586	-0.546	8364	0.8229	8742	-0.5789	8440	0.826	8757
LCN15	0.6916	791	0.1274	1412	0.72	1121	0.1532	1647	0.6332	1547	0.2067	2250	-0.4598	7286	0.6213	6589	0.7587	438	0.0735	873	0.8273	120	0.0274	317	-0.4286	6832	0.5864	6154	-0.3726	6540	0.5687	6056	-0.5544	8167	0.695	7433
EXOSC1	0.6914	792	0.048	533	0.8817	176	0.0082	103	0.592	1961	0.1433	1618	0.4687	3107	0.2627	2793	0.4593	3300	0.2805	3004	0.6381	1193	0.0787	894	0.3966	3813	0.3405	3554	0.3794	4504	0.4096	4367	0.3113	4859	0.4457	4728
FLCN	0.6912	793	0.0765	852	0.4199	4112	0.3916	4189	0.3423	4700	0.4529	4791	0.6575	1103	0.1111	1175	0.2813	5047	0.4851	5145	0.7112	609	0.0586	662	0.5805	1866	0.1803	1973	0.2686	5440	0.5161	5505	0.3907	4135	0.3971	4226
PDE6H	0.6912	794	0.0481	534	-0.5674	8037	0.7812	8308	0.5455	2460	0.1899	2080	0.6487	1178	0.0817	880	-0.497	7667	0.7625	8012	0.5349	2173	0.1638	1809	0.3816	3986	0.3576	3749	0.4799	3407	0.2909	3134	0.4808	3143	0.2686	2822
PCDHGA9	0.6912	795	0.0765	854	0.5007	3352	0.3181	3418	0.4262	3764	0.363	3862	0.394	3979	0.3852	4106	0.5131	2737	0.2619	2821	0.3449	4272	0.4118	4406	-0.5221	7915	0.7377	7814	-0.5007	7886	0.733	7768	0.3328	4668	0.4473	4744
MUTYH	0.6912	796	0.1283	1419	0.7957	555	0.0815	849	-0.8337	10538	0.9718	10325	-0.6374	9278	0.8044	8496	-0.3338	5880	0.5247	5553	0.8242	129	0.0289	341	0.6906	896	0.1305	1469	-0.5014	7893	0.6736	7155	0.6972	906	0.1397	1485
SCARF1	0.6911	797	0.0482	536	0.4992	3369	0.2924	3139	0.7134	748	0.0395	477	0.8094	189	0.0065	76	0.3333	4674	0.4285	4545	0.5033	2453	0.1965	2131	0.4911	2746	0.2276	2439	0.522	2935	0.2396	2603	-0.3302	5800	0.553	5904
CFI	0.6911	798	0.2182	2422	-0.8625	10444	0.9286	9877	0.8962	41	0.0313	377	0.7239	580	0.1861	2038	-0.6489	9318	0.7286	7699	0.4775	2719	0.3945	4198	-0.668	9573	0.7497	7925	0.5221	2933	0.3954	4215	0.7457	554	0.1703	1811
ABCA9	0.691	799	0.0768	857	0.2836	5168	0.4922	5228	-0.5143	7963	0.7439	7844	0.4484	3336	0.3246	3454	-0.515	7869	0.7343	7755	0.3899	3792	0.3627	3901	0.6229	1465	0.1382	1568	-0.4348	7181	0.6674	7099	0.6958	923	0.0898	963
PAPPA	0.6907	800	0.0484	539	-0.3938	6355	0.6116	6508	-0.5437	8276	0.8195	8646	0.5357	2378	0.186	2037	0.4846	3020	0.2496	2704	0.4898	2591	0.2116	2274	-0.3791	6209	0.6061	6388	-0.4636	7483	0.7396	7815	0.7894	333	0.0139	168
YBX1	0.6906	801	0.077	862	-0.4532	6935	0.6459	6875	0.2936	5074	0.4901	5166	0.3994	3913	0.3785	4029	0.6899	973	0.0854	1010	0.2385	4982	0.475	5056	0.3795	4013	0.3914	4092	0.497	3206	0.3083	3308	-0.3608	6083	0.5673	6046
MUC2	0.6906	802	0.077	859	0.7493	875	0.0886	925	0.8091	216	0.0184	231	-0.2715	5417	0.5137	5439	0.2935	4965	0.4792	5062	0.3524	4200	0.405	4309	-0.4365	6925	0.6446	6822	0.4804	3402	0.325	3487	-0.4662	7239	0.668	7155
CYP2J2	0.6906	803	0.0484	540	0.7655	756	0.0519	556	0.2843	5131	0.4785	5066	0.3902	4030	0.3583	3822	-0.2734	5450	0.5188	5488	0.6748	863	0.0531	607	0.7366	541	0.025	310	-0.4973	7859	0.7752	8188	0.4281	3730	0.3267	3493
RHD	0.6904	804	0.1291	1429	0.6637	1681	0.2091	2208	-0.3718	6358	0.5622	5953	-0.6089	8982	0.7721	8142	0.5652	2194	0.2733	2934	0.5743	1797	0.2428	2594	0.8011	217	0.0423	518	0.685	1081	0.1569	1711	-0.6707	9397	0.8195	8697
NPM1	0.6904	805	0.1292	1430	0.7179	1145	0.1554	1677	0.7793	326	0.0589	696	0.4221	3647	0.393	4182	0.7111	781	0.1157	1351	0.4127	3515	0.3817	4082	0.5314	2318	0.2881	3021	-0.7408	10133	0.9075	9631	0.9673	4	0.0005	9
LSS	0.6903	806	0.0771	863	-0.5091	7491	0.6939	7379	0.6863	991	0.09	1067	0.8635	65	0.0055	62	0.6381	1467	0.1328	1531	-0.2776	5211	0.4939	5246	0.4211	3493	0.344	3596	-0.4705	7576	0.7029	7468	0.6078	1768	0.1769	1891
YWHAQ	0.6902	807	0.0484	538	0.7087	1239	0.0957	1013	-0.6378	9295	0.9097	9660	0.4595	3210	0.2745	2894	-0.5749	8511	0.8448	8882	0.673	884	0.0538	618	0.2644	4992	0.4676	4912	0.5162	3003	0.2476	2688	0.5123	2828	0.2344	2505
PLD5	0.6901	808	0.0485	541	0.6927	1397	0.1081	1156	0.8449	124	0.0027	44	-0.3655	6195	0.5982	6353	-0.2971	5580	0.5349	5676	0.7996	183	0.0061	69	0.599	1695	0.12	1355	0.5801	2223	0.1703	1861	-0.5321	7924	0.7747	8252
SPTAN1	0.69	809	0.0487	543	-0.512	7527	0.7288	7763	0.5109	2796	0.2312	2469	0.722	593	0.0336	378	0.696	926	0.0501	589	0.8471	84	0.0013	15	0.4028	3733	0.3331	3467	0.5407	2709	0.2174	2367	-0.6733	9419	0.9165	9748
FIP1L1	0.6898	810	0.0488	547	0.6078	2250	0.1855	1998	0.36	4528	0.4097	4362	0.6184	1477	0.1095	1142	-0.3259	5805	0.5595	5921	0.5555	1976	0.146	1633	0.6852	949	0.052	632	0.788	324	0.0139	144	0.5318	2608	0.2128	2278
GLRB	0.6896	811	0.1298	1440	0.7576	802	0.1158	1250	-0.5732	8577	0.7366	7774	-0.5237	8012	0.677	7208	0.34	4613	0.4601	4869	0.3421	4303	0.439	4685	-0.4697	7299	0.619	6528	0.6758	1166	0.1685	1848	0.6289	1547	0.2178	2337
NAGS	0.6894	812	0.13	1444	0.6649	1667	0.2083	2200	-0.3688	6324	0.5591	5911	0.8291	141	0.0293	340	-0.8593	10599	0.983	10474	-0.4226	6621	0.5718	6059	0.7008	813	0.121	1364	0.34	4931	0.4759	5091	0.9391	10	0.0025	27
GAL3ST2	0.6892	813	0.0784	872	-0.2984	5598	0.5284	5579	-0.7914	10409	0.9778	10394	0.9317	10	0.0002	5	0.4588	3306	0.3185	3463	0.5702	1828	0.1772	1954	0.8073	197	0.018	229	-0.6568	9476	0.8863	9405	0.438	3604	0.3483	3688
BRD2	0.6892	814	0.1302	1446	-0.8762	10487	0.9696	10319	-0.6287	9198	0.7945	8358	0.593	1781	0.2434	2611	-0.6109	8920	0.7717	8126	0.8208	137	0.0305	370	0.6966	834	0.1246	1404	-0.5169	8044	0.6851	7277	0.6997	878	0.1364	1449
HRH2	0.689	815	0.0785	875	0.7277	1051	0.1049	1117	0.7388	558	0.0523	627	0.4272	3589	0.346	3677	0.7519	472	0.0445	513	0.3927	3759	0.3595	3864	0.6345	1373	0.1279	1440	-0.4256	7084	0.6584	6994	0.5862	2002	0.1988	2142
SLC35A3	0.6888	816	0.049	552	-0.4221	6648	0.6397	6817	0.3259	4843	0.4462	4735	0.5179	2600	0.2063	2238	0.3246	4745	0.4373	4635	0.6047	1511	0.1059	1180	0.3825	3973	0.3566	3731	-0.7476	10175	0.9761	10394	-0.296	5554	0.5261	5608
DES	0.6888	817	0.1305	1449	0.3976	4326	0.43	4587	0.7638	407	0.0715	844	-0.3668	6207	0.5442	5768	0.6534	1318	0.1765	1982	0.7654	312	0.0605	683	0.8284	143	0.0292	365	-0.6842	9725	0.8506	9016	-0.685	9536	0.8341	8860
SF3B4	0.6888	818	0.0785	876	-0.3754	6175	0.5822	6198	-0.7907	10406	0.9776	10391	-0.2918	5543	0.5231	5545	0.3384	4638	0.4449	4717	0.2414	4980	0.4747	5054	0.8686	61	0.0047	74	0.5987	2009	0.1953	2140	0.3167	4823	0.4581	4871
ST6GAL1	0.6885	819	0.049	554	0.4811	3549	0.3116	3337	0.4412	3582	0.3147	3343	0.6923	801	0.0501	520	0.7423	527	0.0249	305	0.4496	3042	0.256	2731	0.3867	3928	0.3511	3682	0.5174	2990	0.2454	2661	-0.3582	6057	0.5775	6171
CDK6	0.6884	820	0.0022	43	-0.5402	7781	0.8828	9353	0.2938	5073	0.3886	4151	0.5104	2674	0.0598	638	-0.3594	6138	0.7443	7853	0.6298	1282	0.0065	77	0.55	2128	0.0318	401	0.4263	4012	0.1932	2117	0.4026	3988	0.2003	2156
PPIE	0.6881	821	0.0793	883	0.3041	5062	0.4814	5117	0.6931	930	0.0829	993	0.5664	2059	0.2018	2197	-0.3448	5992	0.5612	5939	0.486	2636	0.2571	2740	0.8626	69	0.0055	81	0.3478	4862	0.4624	4939	-0.619	8854	0.8263	8761
PARS2	0.6879	822	0.0797	890	0.6124	2192	0.2143	2261	-0.45	7234	0.6763	7132	0.8468	95	0.0082	107	0.7304	615	0.0569	671	-0.5111	7644	0.7151	7537	-0.297	5453	0.5176	5447	-0.4014	6824	0.6361	6783	-0.4332	6875	0.6358	6803
PARP6	0.6877	823	0.0498	559	0.4614	3721	0.3277	3526	0.3263	4841	0.4461	4734	0.5661	2064	0.1568	1719	0.3928	4043	0.3617	3877	0.6065	1495	0.1037	1168	0.7705	355	0.0138	189	0.3024	5235	0.485	5181	-0.5259	7857	0.7685	8188
FTSJ1	0.6874	824	0.0503	563	-0.7147	9494	0.9156	9739	-0.5416	8245	0.8172	8620	0.7723	320	0.0143	166	0.3908	4070	0.364	3900	0.5738	1803	0.1312	1451	0.687	934	0.0515	622	-0.3724	6538	0.6293	6716	0.6916	956	0.0614	684
TDP1	0.6874	825	0.0503	564	0.4971	3388	0.2938	3152	0.7417	537	0.0258	305	0.748	432	0.0205	241	0.5008	2848	0.234	2535	0.6161	1418	0.0967	1087	-0.3293	5704	0.5524	5817	-0.4656	7514	0.742	7848	0.798	283	0.012	136
OPA1	0.6873	826	0.1315	1461	0.8167	439	0.0662	700	0.5463	2450	0.2994	3155	0.6349	1288	0.1962	2137	-0.5312	8047	0.6846	7228	0.3488	4230	0.4346	4633	0.5444	2184	0.2789	2923	-0.464	7491	0.6415	6823	0.6925	948	0.1448	1546
RNF213	0.6873	827	0.0802	895	0.6852	1472	0.1437	1545	-0.3129	5814	0.5474	5784	0.4762	3028	0.2933	3113	0.3014	4910	0.473	4998	0.6225	1360	0.1304	1445	-0.7469	10161	0.9571	10162	-0.4736	7612	0.707	7511	0.6557	1293	0.1275	1351
HNRNPAB	0.6872	828	0.0504	565	-0.2263	5355	0.5078	5356	0.626	1602	0.1091	1256	0.5957	1744	0.1291	1389	-0.4355	6995	0.686	7248	0.4964	2526	0.2038	2214	0.7373	534	0.0245	302	-0.6608	9519	0.9284	9862	-0.4282	6822	0.6567	7029
MYL6B	0.6868	829	0.1321	1467	0.6367	1954	0.2372	2552	0.5614	2290	0.2848	3006	0.4349	3496	0.3814	4058	0.7268	650	0.1026	1195	0.3106	4599	0.4562	4864	0.6403	1314	0.1829	2002	0.4748	3465	0.3724	4013	0.7257	684	0.1128	1188
ABHD1	0.6867	830	0.1322	1470	0.3946	4348	0.4327	4614	0.4867	3060	0.351	3729	0.2765	5071	0.4852	5127	0.6117	1717	0.2265	2469	0.5759	1783	0.2416	2579	-0.3516	5902	0.527	5548	0.5368	2772	0.3224	3461	0.8367	130	0.0313	366
PPP2R3A	0.6862	831	0.051	573	-0.8904	10530	0.9939	10588	0.3931	4174	0.3724	3966	0.61	1573	0.1154	1223	0.5817	2021	0.1474	1672	-0.253	5112	0.4792	5099	0.7184	683	0.0337	419	0.4645	3572	0.3088	3315	0.3548	4474	0.4064	4309
PLCB2	0.6862	832	0.051	574	-0.4895	7287	0.708	7521	0.3901	4212	0.3756	3998	0.7355	502	0.0264	308	0.6062	1776	0.1244	1440	0.3678	4047	0.3561	3828	0.5817	1854	0.1355	1529	-0.4333	7161	0.7024	7458	0.4032	3984	0.3559	3773
ICAM3	0.6861	833	0.0805	896	-0.7305	9624	0.9014	9571	0.7739	352	0.0328	398	0.5507	2215	0.2182	2356	0.413	3839	0.3659	3920	0.4575	2959	0.289	3103	0.6426	1291	0.1211	1366	-0.4089	6916	0.6426	6837	0.7859	354	0.0325	385
ADRA1D	0.6859	834	0.0806	898	0.6119	2199	0.2151	2270	0.7465	513	0.0484	582	0.7856	263	0.0258	294	0.795	283	0.0233	288	0.3485	4234	0.4088	4361	0.6268	1435	0.1347	1511	-0.5823	8714	0.816	8629	0.6838	1020	0.1019	1064
IMPG2	0.6856	835	0.081	902	-0.6568	8945	0.8355	8841	0.4813	3120	0.3048	3222	0.7667	339	0.0342	386	0.8389	130	0.0101	143	0.4742	2756	0.2705	2886	0.7187	681	0.0601	728	-0.6188	9113	0.8524	9042	-0.3335	5836	0.5438	5784
ATP6V1D	0.6854	836	0.0515	578	0.5796	2537	0.2132	2244	0.5163	2759	0.2251	2416	0.398	3929	0.3491	3712	0.5214	2648	0.2084	2312	0.7499	394	0.017	200	0.3814	3987	0.3578	3754	-0.5529	8443	0.8292	8809	0.5654	2261	0.1773	1897
CSPG5	0.6853	837	0.0813	906	-0.6089	8452	0.7888	8390	-0.64	9314	0.8717	9201	0.6496	1165	0.1187	1253	0.7348	576	0.0541	643	0.3714	4008	0.3834	4100	0.7609	406	0.0363	459	-0.7982	10434	0.9802	10446	-0.4527	7093	0.6556	7017
ZNF599	0.6852	838	0.0516	579	-0.589	8250	0.8032	8527	0.6993	869	0.048	576	0.5915	1797	0.1323	1426	-0.4688	7376	0.728	7693	0.3828	3880	0.3373	3634	0.7318	571	0.0274	340	0.5111	3053	0.2523	2743	0.3656	4385	0.3958	4213
HADHA	0.6852	839	0.1329	1477	0.8497	284	0.0438	478	-0.6237	9121	0.7885	8307	0.5989	1705	0.2368	2537	0.729	631	0.1006	1167	0.3546	4179	0.4295	4578	0.7757	329	0.0579	701	-0.4248	7077	0.6071	6483	-0.3757	6239	0.5513	5880
RASL10B	0.6852	840	0.0517	581	-0.3849	6269	0.6031	6414	0.4689	3248	0.2813	2967	0.7253	570	0.032	366	-0.3972	6554	0.6377	6758	0.4433	3120	0.2636	2804	0.6119	1572	0.1096	1239	0.3563	4789	0.4359	4653	-0.3916	6410	0.6142	6538
TRIM39	0.6847	841	0.2243	2482	-0.5878	8240	0.6534	6959	0.6702	1166	0.2503	2684	-0.4434	7102	0.5563	5892	0.9301	16	0.0147	195	0.3596	4130	0.4636	4945	0.5563	2071	0.3417	3565	-0.6335	9244	0.7163	7600	-0.2668	5400	0.4958	5281
SMARCA4	0.6846	842	0.0525	583	0.5253	3131	0.2696	2894	0.8585	92	0.0014	31	0.8386	109	0.0025	28	0.6382	1465	0.0955	1116	-0.7097	9882	0.9599	10199	0.6122	1566	0.1092	1236	0.4394	3857	0.3398	3662	-0.5	7610	0.7399	7911
NUDT4P1	0.6843	843	0.2245	2485	-0.6532	8907	0.719	7656	0.5621	2286	0.358	3799	0.7174	625	0.193	2107	-0.9968	10670	0.9999	10669	0.5964	1571	0.3053	3302	-0.3225	5643	0.5009	5267	-0.7066	9891	0.7943	8394	0.833	145	0.0812	857
TLR10	0.6843	844	0.0527	585	0.6614	1699	0.1357	1465	0.557	2335	0.1769	1946	0.6933	794	0.0495	514	0.6564	1285	0.0785	940	-0.5092	7622	0.7621	7985	-0.6947	9805	0.9532	10129	0.3786	4514	0.41	4374	0.5352	2578	0.209	2238
RPS25	0.6842	845	0.1335	1487	0.8899	156	0.0225	249	0.7242	673	0.1061	1230	0.6423	1227	0.1853	2032	-0.4888	7575	0.6456	6840	0.8473	83	0.0193	228	0.8772	46	0.0106	142	0.3979	4312	0.4365	4661	-0.7901	10288	0.9333	9924
PMPCB	0.6839	846	0.0825	914	0.7991	535	0.0528	569	0.5478	2436	0.2352	2505	0.7572	383	0.0401	431	-0.6442	9273	0.8712	9219	0.4037	3625	0.3478	3738	0.7999	221	0.0203	268	0.604	1946	0.1889	2071	0.2568	5156	0.4904	5211
EIF2B1	0.6838	847	0.0825	915	-0.683	9196	0.8591	9104	0.8483	116	0.008	111	0.3798	4137	0.402	4274	0.4124	3844	0.3673	3932	0.6005	1544	0.1493	1660	0.9538	4	0.0001	5	-0.3857	6665	0.621	6629	0.8668	66	0.0064	64
SPHAR	0.6838	848	0.0826	918	0.5946	2392	0.2321	2484	0.6111	1764	0.1655	1830	-0.3977	6568	0.6136	6515	0.6118	1712	0.1611	1811	-0.3907	6240	0.5823	6169	-0.3641	6030	0.5709	6007	0.434	3916	0.3729	4015	0.5389	2545	0.2494	2655
ZNF273	0.6837	849	0.0119	147	0.4649	3685	0.2635	2828	0.3153	4935	0.4148	4398	0.5653	2075	0.0684	726	0.4415	3527	0.2095	2328	0.5867	1653	0.043	493	0.3211	4594	0.3742	3924	-0.3393	6202	0.6705	7130	0.5322	2601	0.115	1213
FIGN	0.6835	850	0.0533	589	-0.5945	8303	0.8082	8578	-0.3417	6062	0.5854	6182	0.4733	3055	0.2578	2739	0.3663	4341	0.3916	4168	0.4144	3488	0.2974	3207	0.7139	728	0.0362	457	0.5038	3138	0.2614	2843	0.8554	90	0.0021	23
SEC22C	0.6834	851	0.0832	924	-0.2134	5342	0.5084	5364	0.4848	3081	0.3015	3181	0.7007	744	0.0742	810	0.4606	3280	0.3165	3431	0.6332	1240	0.1208	1318	-0.2974	5456	0.5177	5451	0.3895	4402	0.425	4547	0.4406	3579	0.3457	3664
TSC22D1	0.6834	852	0.0535	593	0.5683	2669	0.2247	2395	-0.6269	9173	0.9002	9546	0.7068	696	0.0411	438	0.478	3097	0.2582	2784	0.6008	1540	0.1081	1199	0.6044	1641	0.1149	1304	-0.5889	8791	0.8644	9178	0.374	4305	0.3878	4128
FAAH	0.6833	853	0.0833	929	0.6721	1599	0.1565	1690	-0.2313	5405	0.5159	5433	0.688	835	0.0836	893	0.7127	773	0.0692	828	0.2771	4825	0.462	4926	0.3665	4144	0.4052	4217	-0.8899	10637	0.998	10637	0.4626	3362	0.3222	3441
ASIP	0.6831	854	0.0835	931	-0.6096	8459	0.7893	8396	0.5711	2193	0.2077	2262	0.6567	1110	0.1116	1184	0.6554	1294	0.1175	1364	-0.3463	5742	0.5368	5700	-0.2982	5461	0.5179	5453	0.7488	559	0.054	605	0.5825	2043	0.2021	2171
LIPG	0.6831	855	0.0836	934	-0.2619	5425	0.5162	5440	-0.455	7294	0.6814	7183	0.4567	3251	0.315	3337	0.6671	1180	0.106	1243	0.7662	309	0.0305	368	0.7461	489	0.044	534	-0.5672	8576	0.8018	8470	0.8143	220	0.02	255
RIOK1	0.6828	856	0.084	939	0.6705	1618	0.1578	1710	-0.5124	7938	0.7424	7823	0.8213	158	0.0131	152	-0.736	10097	0.9463	10066	0.6187	1402	0.1331	1468	0.7113	748	0.0647	790	0.678	1152	0.1112	1222	-0.492	7531	0.6929	7413
NAALADL2	0.6828	857	0.0539	595	-0.3494	5979	0.5719	6082	-0.43	7003	0.6897	7263	0.7747	307	0.0134	156	0.5286	2562	0.2009	2228	0.4793	2705	0.224	2399	0.755	432	0.0182	231	-0.6012	8936	0.8776	9316	0.7913	323	0.0133	159
STAT5A	0.6826	858	0.0539	596	0.4367	3957	0.3534	3791	-0.4308	7013	0.6906	7276	0.6115	1558	0.1141	1212	-0.3898	6456	0.6284	6642	0.4369	3194	0.2708	2889	0.4721	2939	0.2489	2649	0.3109	5186	0.4786	5113	-0.3792	6275	0.6013	6411
FGF2	0.6826	859	0.0842	942	0.4823	3534	0.3334	3595	-0.5286	8105	0.7578	7974	0.6168	1495	0.1503	1641	0.368	4320	0.4169	4419	0.2859	4776	0.4572	4880	0.4451	3221	0.3175	3321	0.4529	3701	0.3534	3818	0.3246	4745	0.4531	4808
SLC7A1	0.6826	860	0.0842	941	0.8342	343	0.0344	387	0.3805	4321	0.4163	4413	0.7664	342	0.0343	390	-0.4343	6973	0.6501	6881	0.4921	2567	0.2509	2676	0.4355	3326	0.3292	3440	-0.7246	10020	0.9388	9982	0.3365	4632	0.4445	4718
DHRSX	0.6826	861	0.0842	943	0.55	2873	0.2742	2951	0.3999	4087	0.3941	4212	0.245	5176	0.497	5242	0.4522	3388	0.3263	3538	0.6043	1514	0.1447	1615	0.3259	4552	0.4432	4660	-0.4547	7395	0.6864	7291	0.4247	3763	0.3595	3806
MAGEC3	0.6825	862	0.0843	945	-0.6243	8596	0.8049	8550	0.6845	1011	0.0921	1088	0.504	2737	0.2642	2809	0.4624	3259	0.3141	3386	-0.7315	10051	0.945	10015	0.3875	3921	0.3818	4006	0.7461	575	0.0559	623	0.8977	32	0.0024	26
CPA6	0.6822	863	0.0541	597	-0.6899	9260	0.8981	9523	0.7338	597	0.0296	355	0.4708	3082	0.2607	2768	0.3338	4670	0.4278	4537	0.6653	946	0.0602	678	0.5269	2368	0.1887	2055	0.4279	3996	0.3539	3831	0.4673	3311	0.2839	3011
BAK1	0.6822	864	0.0542	600	0.3997	4304	0.3904	4169	0.5628	2278	0.1708	1887	-0.2667	5396	0.5119	5415	0.42	3769	0.3285	3554	0.6831	796	0.0493	555	-0.3519	5908	0.5755	6055	-0.2734	5729	0.5457	5807	0.5812	2053	0.1625	1713
NIT1	0.6822	865	0.0542	599	-0.9141	10581	0.9964	10624	-0.4512	7247	0.7176	7556	0.7079	687	0.0405	433	0.5856	1982	0.1435	1629	0.4006	3658	0.3154	3383	0.8697	59	0.0007	18	0.5012	3167	0.2646	2882	0.6371	1466	0.1094	1146
GPR3	0.682	866	0.0847	948	0.4279	4038	0.3832	4096	0.4515	3457	0.3372	3590	0.5512	2213	0.2174	2347	-0.3561	6094	0.5724	6038	0.4961	2530	0.2469	2627	0.4523	3131	0.3077	3212	0.495	3235	0.31	3341	0.6398	1434	0.144	1537
RIN3	0.6817	867	0.0543	601	0.4271	4046	0.3638	3891	0.4228	3802	0.3351	3567	-0.4612	7304	0.7203	7633	0.8228	180	0.0046	73	0.6412	1161	0.0764	863	0.7015	807	0.0433	530	0.6853	1078	0.0705	788	0.4232	3785	0.3307	3539
MUC7	0.6816	868	0.0544	602	0.5602	2757	0.2328	2491	0.5304	2616	0.208	2267	0.3871	4059	0.362	3868	0.5307	2542	0.1988	2202	0.6688	921	0.0573	653	-0.4105	6596	0.6459	6840	0.3701	4633	0.4199	4495	-0.311	5657	0.5376	5735
AP3B1	0.6816	869	0.0544	603	0.5503	2869	0.2432	2626	0.5919	1963	0.1433	1619	0.4254	3617	0.3162	3347	-0.4445	7096	0.6965	7365	0.7524	381	0.0164	192	0.7153	711	0.0354	440	-0.463	7474	0.7391	7810	-0.4028	6528	0.6271	6689
CACNA2D4	0.6815	870	0.0544	604	-0.7073	9418	0.9098	9667	0.5081	2828	0.2352	2507	0.7665	341	0.0155	178	0.3807	4168	0.3752	4000	-0.5651	8326	0.8257	8695	0.833	129	0.0029	55	0.5129	3031	0.2499	2716	0.5832	2037	0.1608	1705
CPSF3	0.6815	871	0.0545	606	-0.3138	5686	0.5466	5762	0.4787	3149	0.2685	2857	-0.398	6571	0.6404	6819	0.7228	695	0.0352	402	0.7208	564	0.0291	344	0.8001	219	0.0071	97	-0.4853	7726	0.7626	8061	0.5842	2026	0.1597	1691
REM1	0.6813	872	0.0854	953	-0.7115	9458	0.8857	9385	0.5098	2806	0.2766	2928	0.7252	572	0.0576	612	0.422	3753	0.3568	3835	0.4484	3060	0.298	3212	0.3852	3946	0.3844	4030	-0.4986	7870	0.7316	7755	0.5126	2822	0.2748	2911
PAQR5	0.6813	873	0.0547	611	-0.4693	7101	0.6873	7296	0.5633	2274	0.17	1878	0.8606	74	0.001	14	0.5602	2236	0.1671	1865	0.3779	3941	0.3437	3701	0.7613	404	0.0161	216	0.666	1272	0.0861	953	-0.269	5411	0.5086	5429
ARHGAP20	0.6811	874	0.0548	612	-0.8426	10372	0.9838	10481	0.5234	2668	0.2156	2327	0.4564	3257	0.277	2935	0.3627	4376	0.3965	4210	0.3628	4101	0.3617	3891	0.5192	2448	0.1959	2125	-0.3648	6448	0.6213	6633	0.4768	3188	0.272	2866
PRPF3	0.681	875	0.0857	958	0.7127	1201	0.1178	1274	0.5459	2455	0.2377	2527	0.3903	4027	0.3892	4149	0.6356	1491	0.1348	1558	0.5034	2452	0.2412	2577	0.6944	852	0.0759	905	-0.54	8287	0.7731	8161	0.2902	4993	0.4755	5075
ST3GAL5	0.6809	876	0.1367	1526	0.9331	61	0.0087	109	0.6982	877	0.1297	1482	-0.5616	8444	0.7176	7605	0.3799	4178	0.4323	4582	0.2566	4920	0.4731	5036	0.7482	475	0.0769	919	0.758	499	0.0847	936	0.7548	499	0.0865	916
BRD1	0.6804	877	0.0553	616	0.3212	4943	0.4571	4872	0.7945	259	0.01	132	0.6075	1599	0.1184	1249	0.5671	2178	0.1598	1798	0.4213	3405	0.2896	3111	0.7801	312	0.0115	158	0.4104	4172	0.3742	4028	-0.3723	6198	0.5928	6327
CUL7	0.6803	878	0.2288	2515	0.5317	3058	0.3844	4105	0.7967	253	0.1096	1263	0.8345	125	0.0735	802	0.8419	120	0.0694	829	-0.8366	10539	0.9298	9821	-0.337	5770	0.5052	5316	0.8264	167	0.0883	978	-0.5424	8030	0.6219	6623
SLC37A1	0.6802	879	0.1375	1539	-0.4235	6664	0.584	6214	0.5601	2301	0.2857	3016	-0.8092	10474	0.9619	10230	0.6321	1525	0.2029	2250	0.6246	1339	0.1904	2071	0.4399	3271	0.3664	3846	-0.7796	10354	0.937	9951	0.9054	24	0.0064	66
ADCY3	0.6802	880	0.0554	617	-0.3545	6018	0.5755	6123	-0.4558	7297	0.7232	7610	0.4265	3603	0.3146	3332	0.726	661	0.0333	381	-0.3053	5397	0.5102	5437	0.5479	2147	0.1642	1828	0.466	3545	0.3073	3292	-0.5314	7918	0.7738	8242
MFN2	0.6802	881	0.0858	959	-0.6071	8435	0.7867	8374	0.7797	325	0.0297	357	-0.4089	6691	0.6245	6624	0.7225	698	0.0615	734	0.4497	3039	0.2968	3196	0.8861	37	0.0026	48	0.315	5159	0.4892	5243	0.4177	3838	0.3663	3896
INA	0.6799	882	0.0555	618	0.6266	2067	0.1676	1807	0.7545	464	0.0204	254	0.62	1460	0.1081	1132	0.3943	4028	0.3602	3860	0.6296	1285	0.0853	962	0.4396	3277	0.2863	2997	0.3761	4548	0.4135	4414	0.4099	3916	0.3478	3682
EGF	0.6798	883	0.0861	961	0.7599	790	0.0828	855	-0.3938	6584	0.6202	6542	0.7444	456	0.0464	491	-0.4322	6946	0.6476	6860	0.7512	388	0.0377	441	-0.506	7720	0.7193	7606	-0.7844	10372	0.9748	10379	0.849	103	0.0104	107
RASGRP1	0.6796	884	0.1381	1547	0.6655	1658	0.2075	2191	-0.8776	10614	0.9884	10517	0.6693	996	0.1552	1699	0.4298	3677	0.3904	4156	0.8752	44	0.0095	111	0.4361	3314	0.3707	3892	0.5665	2386	0.2939	3176	0.5472	2463	0.2995	3177
MARCO	0.6796	885	0.0863	963	0.6455	1856	0.1797	1931	0.5239	2666	0.2604	2768	0.5121	2653	0.2566	2729	-0.7406	10123	0.9498	10099	0.5946	1590	0.1543	1705	-0.4685	7282	0.6793	7182	0.5593	2486	0.2404	2612	0.3885	4161	0.3997	4249
KCND2	0.6793	886	0.0865	964	-0.3311	5823	0.5476	5779	-0.5647	8495	0.7975	8399	0.7467	442	0.0454	482	0.8109	221	0.0175	233	0.4451	3095	0.3013	3250	0.8255	150	0.0122	164	-0.558	8482	0.7907	8348	0.4886	3067	0.2977	3156
CCKAR	0.6792	887	0.1388	1560	0.532	3055	0.3321	3581	0.4019	4059	0.4241	4494	-0.3547	6068	0.5355	5672	-0.7461	10161	0.911	9645	0.7512	390	0.0701	788	0.3648	4163	0.4344	4550	0.7285	710	0.1121	1239	0.3893	4149	0.4257	4503
SLC13A4	0.6792	888	0.1388	1559	0.7372	973	0.1356	1462	0.7501	493	0.0828	992	0.3183	4751	0.4693	4982	0.6044	1797	0.2351	2553	0.6735	879	0.139	1551	0.5322	2310	0.2878	3014	0.6944	996	0.147	1601	0.8114	231	0.0439	508
EDIL3	0.6791	889	0.0559	623	0.6281	2043	0.1664	1789	-0.3929	6567	0.6449	6793	-0.3671	6209	0.6	6368	0.5054	2814	0.2291	2498	0.4865	2629	0.2155	2313	0.6715	1064	0.0619	756	0.2473	5503	0.5152	5497	0.7633	452	0.022	270
CD5	0.6791	890	0.0867	965	0.676	1565	0.1533	1648	0.6868	983	0.0894	1057	-0.3512	6032	0.5677	6011	-0.6652	9490	0.8922	9410	0.5863	1662	0.1627	1800	0.4513	3143	0.3089	3227	-0.7628	10276	0.9627	10244	0.4765	3193	0.3091	3278
SLC30A4	0.679	891	0.0867	966	0.6136	2183	0.2132	2245	0.784	303	0.028	332	-0.3676	6214	0.5828	6168	0.7343	578	0.0546	648	0.701	666	0.065	732	0.6773	1021	0.0899	1055	0.4285	3986	0.3808	4088	0.375	4299	0.4136	4375
AGTRAP	0.679	892	0.0559	621	0.3497	4746	0.4355	4644	-0.4206	6902	0.6787	7151	0.4779	3009	0.2515	2694	0.6044	1798	0.1258	1462	0.649	1085	0.0707	794	-0.4225	6755	0.6635	7040	0.5881	2139	0.162	1781	0.5723	2169	0.1706	1815
HAL	0.6789	893	0.0869	968	-0.4123	6546	0.6129	6523	0.4194	3839	0.3707	3948	0.3819	4114	0.3992	4242	0.5595	2243	0.2149	2363	0.5603	1913	0.1875	2038	0.6312	1406	0.1306	1471	-0.3514	6320	0.591	6302	0.4837	3109	0.3026	3214
ATP6V0B	0.6785	894	0.1394	1568	0.4671	3663	0.3788	4050	0.6664	1204	0.1654	1829	0.6773	934	0.1474	1611	0.5868	1972	0.2543	2741	0.8496	81	0.0179	208	0.5485	2142	0.2755	2893	-0.8173	10499	0.9628	10247	0.8773	55	0.0133	158
TUBB3	0.6783	895	0.0565	625	0.5775	2568	0.2155	2273	0.6256	1604	0.1098	1269	0.6617	1067	0.0718	781	0.4463	3458	0.2968	3190	0.3461	4259	0.381	4074	0.6645	1116	0.0665	808	0.3436	4897	0.4487	4788	0.3306	4690	0.4301	4560
ZCCHC7	0.6782	896	0.0566	626	0.4994	3366	0.2924	3136	-0.3123	5812	0.5604	5925	-0.6043	8935	0.8784	9305	0.3559	4447	0.4049	4278	0.5924	1609	0.1153	1271	0.7758	327	0.0125	168	-0.2934	5844	0.5591	5955	0.4015	4006	0.358	3793
EN1	0.678	897	0.0877	977	0.264	5243	0.4995	5293	-0.299	5707	0.5381	5683	0.527	2484	0.2405	2578	0.4268	3716	0.3522	3798	0.731	499	0.0478	536	0.5258	2386	0.2337	2508	-0.5289	8174	0.7608	8046	-0.5813	8466	0.7859	8372
FBXO18	0.6777	898	0.0573	630	0.4074	4238	0.3837	4099	-0.3391	6045	0.5826	6163	0.6739	955	0.0637	672	0.7297	624	0.0314	364	0.485	2650	0.2173	2334	0.5706	1962	0.1449	1649	0.5467	2637	0.2094	2296	-0.6269	8945	0.8733	9276
ACTL7B	0.6777	899	0.1403	1574	0.4741	3600	0.3732	3989	-0.4473	7206	0.6247	6595	0.5721	2010	0.2636	2805	0.7591	436	0.0735	872	0.8373	98	0.0232	274	0.3847	3949	0.4193	4393	-0.711	9930	0.8774	9310	0.4724	3248	0.3586	3800
PROP1	0.6776	900	0.1404	1581	-0.698	9343	0.8276	8756	0.5157	2766	0.3291	3508	0.3311	4631	0.4629	4896	-0.6817	9662	0.8464	8907	0.656	1023	0.1573	1746	0.4178	3537	0.3882	4073	-0.8691	10609	0.9861	10508	0.6589	1261	0.1818	1964
SCN7A	0.6776	901	0.0573	632	-0.5459	7834	0.7589	8079	0.3706	4420	0.3981	4252	-0.5647	8482	0.8367	8849	0.7253	670	0.0338	388	0.643	1148	0.0746	847	-0.4185	6711	0.6582	6987	0.7572	505	0.0242	266	0.5322	2602	0.2122	2268
RPTN	0.6776	902	0.0879	980	0.6291	2031	0.1969	2098	0.4105	3948	0.3826	4079	0.4576	3238	0.3141	3325	0.3463	4544	0.4378	4642	0.322	4493	0.4318	4605	-0.5891	8726	0.8134	8578	0.6963	976	0.0925	1014	0.7313	649	0.0647	717
EFHA1	0.6775	903	0.0573	633	0.683	1498	0.1172	1268	-0.4943	7727	0.7682	8072	0.4713	3075	0.2599	2765	-0.4702	7393	0.7291	7710	0.5829	1703	0.1232	1349	0.7651	381	0.0152	205	-0.3246	6085	0.582	6206	0.4046	3973	0.354	3752
ACMSD	0.6775	904	0.0574	634	0.5684	2667	0.2245	2391	0.3015	5034	0.4663	4936	0.2879	4984	0.4618	4880	0.3786	4198	0.3774	4027	0.5591	1933	0.1428	1593	0.6785	1010	0.0578	699	0.4749	3463	0.2964	3197	-0.4147	6663	0.6404	6848
PUS1	0.6775	905	0.088	981	0.3241	4923	0.4678	4967	0.4188	3848	0.3717	3954	0.5828	1893	0.1839	2014	0.5602	2235	0.2143	2356	-0.484	7349	0.6835	7210	0.43	3387	0.3348	3485	0.6775	1154	0.1114	1230	0.4263	3745	0.3581	3796
CASP9	0.6774	906	0.0574	635	-0.4525	6926	0.6703	7140	0.3421	4701	0.4305	4559	0.5209	2569	0.2023	2209	0.3054	4882	0.4537	4801	0.7945	195	0.0069	81	-0.3755	6168	0.602	6336	-0.553	8444	0.8295	8811	-0.5406	8012	0.7839	8356
VTA1	0.6773	907	0.1408	1584	-0.7516	9801	0.8801	9329	-0.373	6367	0.5632	5965	0.6881	833	0.1363	1481	0.8834	49	0.01	139	0.3674	4049	0.4215	4494	0.5592	2051	0.2666	2810	-0.8134	10485	0.9611	10225	0.8408	121	0.029	345
SCNN1G	0.6772	908	0.0883	986	-0.4166	6592	0.6163	6558	0.2417	5313	0.5111	5394	0.67	990	0.0996	1030	0.4278	3705	0.351	3782	0.4081	3568	0.3434	3697	0.5601	2043	0.2009	2166	0.4883	3305	0.3161	3393	0.3959	4076	0.3907	4151
DPF2	0.6771	909	0.0883	987	-0.4424	6825	0.6379	6800	0.6867	985	0.0896	1061	0.6447	1209	0.1236	1318	0.2691	5107	0.4917	5204	-0.2575	5123	0.4858	5169	0.705	777	0.069	832	0.7025	923	0.0865	959	0.6802	1058	0.1052	1100
FAF1	0.6769	910	0.0581	637	-0.4194	6625	0.636	6778	-0.7494	10192	0.9766	10382	0.6569	1106	0.0752	818	0.6988	899	0.0486	564	0.5987	1555	0.1097	1215	0.471	2955	0.2501	2664	0.3738	4581	0.4161	4449	-0.5914	8586	0.8381	8900
P2RY14	0.6768	911	0.1412	1592	0.8998	129	0.0184	219	0.648	1391	0.1871	2054	0.6415	1233	0.1873	2046	-0.4465	7117	0.6098	6462	0.6936	713	0.1218	1329	0.7411	511	0.083	983	0.8044	247	0.0483	538	0.603	1827	0.2462	2618
VEGFC	0.6767	912	0.0581	638	0.771	716	0.0496	525	-0.5046	7846	0.7795	8194	0.3272	4665	0.4302	4565	-0.3035	5630	0.5397	5724	0.5666	1862	0.1364	1515	0.4548	3103	0.2692	2828	-0.4839	7715	0.7609	8047	-0.6713	9404	0.9155	9737
AMBP	0.6765	913	0.2329	2556	0.8459	295	0.0895	932	-0.8343	10539	0.9281	9873	0.6981	762	0.2152	2326	-0.5562	8304	0.6333	6701	0.6253	1333	0.2797	2992	-0.5533	8272	0.6244	6596	-0.4676	7542	0.5817	6203	0.5814	2052	0.3382	3602
NCR2	0.6765	914	0.0887	995	0.5071	3300	0.3127	3347	0.6496	1371	0.1247	1436	0.4801	2978	0.2901	3076	0.5346	2501	0.24	2594	0.5771	1774	0.1723	1902	0.6064	1627	0.1532	1727	-0.6322	9231	0.8636	9165	0.8243	184	0.0173	215
CXCL10	0.6764	915	0.0583	640	0.6634	1685	0.1344	1448	0.601	1869	0.1344	1521	0.3695	4248	0.3826	4071	0.526	2597	0.2041	2266	0.5071	2428	0.1927	2096	0.3442	4367	0.4024	4193	-0.8059	10457	0.994	10581	0.7202	729	0.0424	488
MAFF	0.6764	916	0.0887	996	0.8349	339	0.0341	380	0.8126	199	0.0172	213	-0.5006	7741	0.7199	7630	0.2794	5058	0.4863	5155	-0.6701	9525	0.8973	9482	0.4094	3640	0.3562	3725	-0.6351	9260	0.8658	9195	-0.5153	7745	0.7163	7648
SEC14L4	0.6762	917	0.0586	646	0.37	4582	0.4173	4455	0.7208	698	0.0363	438	0.443	3398	0.2942	3122	-0.3323	5872	0.5641	5970	-0.4143	6520	0.6361	6734	0.4473	3191	0.2772	2909	0.4657	3550	0.3073	3294	0.4808	3144	0.2686	2826
TRIM24	0.676	918	0.0586	645	0.4718	3627	0.3189	3435	0.7566	449	0.0194	242	0.3062	4849	0.4497	4737	-0.8806	10625	0.9992	10663	0.5373	2152	0.1619	1790	0.6927	874	0.0486	585	-0.4801	7684	0.7576	8010	-0.2658	5389	0.5064	5403
TUBB4B	0.676	919	0.1422	1600	-0.8552	10423	0.958	10201	0.6952	912	0.1333	1514	0.865	61	0.0142	164	0.579	2058	0.262	2822	-0.4018	6361	0.5522	5866	0.6005	1674	0.2269	2429	-0.5288	8173	0.6948	7378	0.5461	2472	0.3004	3191
TXNL1	0.6759	920	0.0586	644	0.473	3611	0.3177	3404	-0.3916	6558	0.6432	6777	0.4658	3138	0.2665	2826	0.7418	529	0.025	307	-0.3518	5793	0.5588	5928	0.3472	4338	0.399	4156	-0.4002	6808	0.6629	7037	-0.4831	7433	0.7218	7707
UQCRQ	0.6758	921	0.0892	999	-0.6018	8377	0.7819	8319	0.6871	977	0.0891	1049	-0.7033	9875	0.9271	9817	0.3263	4734	0.4541	4805	0.7222	550	0.0521	583	0.7314	575	0.0517	626	0.8074	233	0.0221	242	0.7215	721	0.0716	782
RFPL1	0.6756	922	0.1424	1602	-0.7192	9537	0.8497	8988	0.4534	3436	0.3787	4033	-0.3239	5795	0.518	5476	0.3484	4521	0.455	4812	0.6323	1249	0.1828	2001	0.6525	1206	0.1698	1883	-0.5121	7999	0.6814	7232	0.628	1552	0.2185	2347
MYF5	0.6755	923	0.0893	1002	0.5203	3185	0.3	3223	-0.7259	10048	0.9402	10007	-0.5844	8707	0.8129	8586	-0.53	8037	0.7503	7903	0.5567	1964	0.1912	2080	0.6844	962	0.0843	996	0.4852	3346	0.3193	3438	0.6526	1321	0.131	1386
SARS2	0.6755	924	0.0588	649	0.5933	2403	0.1998	2129	-0.4324	7032	0.6933	7297	0.6741	954	0.0633	669	-0.2134	5288	0.4994	5281	0.6982	688	0.0397	453	0.4268	3426	0.3025	3166	-0.7355	10100	0.9717	10336	0.6358	1477	0.1107	1158
SLC2A13	0.6755	925	0.0588	648	0.5454	2925	0.2495	2692	0.6111	1765	0.1237	1421	0.3932	3986	0.3544	3771	-0.2072	5281	0.4985	5267	0.4315	3269	0.2784	2976	0.6216	1482	0.1021	1168	-0.3737	6551	0.6308	6728	-0.7416	10010	0.962	10227
CNOT8	0.6755	926	0.0893	1001	0.5291	3081	0.2923	3134	-0.3662	6296	0.5952	6293	0.626	1394	0.1397	1519	-0.4129	6717	0.6281	6640	0.247	4962	0.4737	5042	-0.3245	5663	0.5329	5616	0.4174	4106	0.3946	4206	0.6098	1740	0.1747	1864
RGS6	0.6754	927	0.0893	1003	0.8322	354	0.0351	397	0.4734	3207	0.3129	3316	0.5728	2000	0.1957	2131	0.7264	656	0.0594	702	-0.6243	9025	0.8475	8931	0.6129	1562	0.1479	1682	0.4693	3513	0.3358	3615	0.2997	4931	0.4696	5001
TUBA3C	0.6754	928	0.0893	1000	0.7443	923	0.0922	966	0.4709	3232	0.3158	3357	0.4806	2972	0.2898	3069	0.4324	3633	0.3458	3723	-0.3841	6163	0.5766	6106	-0.5557	8302	0.7761	8183	0.5979	2021	0.1966	2157	-0.5633	8272	0.7677	8180
SMARCA2	0.6754	929	0.1426	1610	0.5365	3018	0.3287	3542	-0.5416	8244	0.7036	7409	0.457	3246	0.3598	3840	0.4553	3356	0.3652	3914	0.5466	2064	0.2694	2874	0.6061	1630	0.2209	2376	0.6513	1412	0.1988	2176	0.8643	73	0.018	229
SACS	0.6753	930	0.0893	1004	0.573	2604	0.2504	2697	0.5512	2402	0.2317	2475	-0.452	7211	0.6682	7131	0.6605	1239	0.1121	1313	0.4324	3253	0.316	3393	0.5271	2363	0.2324	2489	-0.5414	8311	0.7741	8173	-0.4624	7201	0.6643	7126
SPIC	0.675	931	0.0895	1005	0.6695	1624	0.1587	1717	-0.6693	9621	0.8986	9523	0.3318	4624	0.4469	4711	0.4281	3700	0.3509	3781	0.7843	228	0.0234	278	0.7866	273	0.0251	311	-0.4668	7528	0.6999	7429	0.7564	494	0.0495	561
IQGAP1	0.675	932	0.0589	650	0.3416	4812	0.4409	4703	-0.4709	7459	0.7398	7800	0.5862	1860	0.1367	1487	0.686	1007	0.0558	658	0.4897	2595	0.2116	2276	0.767	371	0.0148	199	0.7388	634	0.0332	379	-0.769	10171	0.9757	10387
ETV6	0.6747	933	0.059	652	0.411	4204	0.3796	4058	0.6453	1419	0.0911	1080	0.4474	3352	0.2893	3062	0.4375	3582	0.3077	3331	0.3991	3673	0.3175	3402	0.7184	684	0.0337	420	-0.3947	6743	0.6575	6979	0.6049	1803	0.1396	1483
TNIP1	0.6746	934	0.059	651	-0.347	5949	0.5706	6064	0.4417	3577	0.314	3332	0.6592	1086	0.073	794	0.4207	3765	0.3276	3548	-0.491	7420	0.7369	7747	0.7996	222	0.0071	96	0.6367	1591	0.1131	1254	-0.3744	6219	0.5956	6354
MVD	0.6746	935	0.1432	1616	0.3119	5012	0.4814	5118	0.8564	98	0.0175	220	-0.4504	7190	0.6129	6507	-0.6717	9562	0.836	8803	0.7666	304	0.0596	671	-0.2871	5400	0.4962	5210	-0.746	10166	0.911	9661	0.716	768	0.1211	1286
TRIM47	0.6744	936	0.0591	655	-0.5333	7709	0.7475	7950	0.6514	1351	0.0863	1022	0.5492	2232	0.1718	1875	-0.6	8814	0.8693	9199	0.5931	1602	0.1147	1261	0.6332	1386	0.0916	1069	-0.4147	6979	0.6809	7226	0.4509	3481	0.3013	3201
FOXR1	0.6744	937	0.0591	657	0.7554	827	0.0583	628	-0.6015	8873	0.8767	9253	0.4791	2993	0.2501	2683	0.7297	622	0.0314	366	0.339	4334	0.389	4160	0.5082	2558	0.2062	2220	-0.4399	7231	0.711	7547	0.3681	4351	0.3935	4184
DGKA	0.6744	938	0.0901	1010	0.8358	336	0.0332	370	0.3896	4219	0.4064	4328	0.5579	2147	0.2101	2280	-0.6519	9354	0.8801	9294	-0.4521	6973	0.6493	6868	0.3867	3929	0.3824	4011	0.3326	4998	0.4755	5086	0.6567	1285	0.1267	1345
ZNF577	0.6743	939	0.0901	1008	0.3483	4759	0.451	4802	-0.6529	9453	0.8833	9328	0.7314	522	0.0533	555	-0.34	5939	0.5559	5888	0.3835	3875	0.3704	3976	-0.469	7292	0.6796	7189	0.4928	3260	0.3117	3357	0.608	1765	0.1768	1889
OR2L13	0.6741	940	0.0591	658	0.4663	3672	0.3233	3478	0.4029	4046	0.3618	3852	0.368	4267	0.3847	4096	-0.3277	5816	0.5609	5936	0.6366	1205	0.0811	909	-0.3721	6126	0.5972	6275	0.3002	5253	0.4862	5200	0.6756	1098	0.0742	808
PKNOX1	0.6739	941	0.0901	1009	0.3379	4828	0.4576	4877	-0.4326	7035	0.6589	6943	0.7484	427	0.0448	479	0.6875	997	0.0873	1031	0.6049	1507	0.1443	1612	0.5935	1747	0.1671	1853	-0.5274	8159	0.7593	8033	-0.5003	7612	0.7	7483
PDE6D	0.6738	942	0.144	1624	-0.4203	6635	0.5822	6196	-0.3354	6008	0.5343	5639	-0.4618	7311	0.6222	6595	0.8016	250	0.044	500	0.7255	535	0.0921	1033	-0.5429	8154	0.6905	7315	0.644	1502	0.2067	2272	-0.4638	7214	0.6216	6618
ANKH	0.6738	943	0.0594	659	0.521	3174	0.2726	2936	0.5955	1925	0.14	1587	0.5225	2548	0.2008	2188	-0.5561	8303	0.8227	8664	-0.3269	5552	0.5322	5653	0.5818	1852	0.1353	1526	0.5738	2308	0.1761	1946	0.4252	3757	0.3285	3518
TOP2B	0.6733	944	0.1453	1637	-0.5785	8146	0.7062	7508	0.7737	357	0.0639	752	0.3667	4286	0.4389	4645	-0.6081	8896	0.7681	8077	-0.6599	9406	0.8223	8671	0.4779	2867	0.3338	3476	0.7054	891	0.1355	1469	0.7202	728	0.1175	1229
PROC	0.6733	945	0.0595	661	-0.579	8153	0.793	8434	-0.523	8055	0.799	8422	-0.4298	6954	0.6821	7253	0.4998	2861	0.2347	2546	-0.3046	5391	0.5098	5431	0.4008	3762	0.3355	3499	0.5819	2202	0.1675	1841	0.4373	3619	0.3156	3374
RNASE7	0.6733	946	0.2362	2591	0.6188	2137	0.3164	3391	0.9092	32	0.0232	285	0.7281	546	0.1819	1991	0.9567	7	0.0054	81	-0.6271	9052	0.698	7364	-0.7784	10333	0.8787	9301	0.6397	1555	0.2909	3133	0.3825	4221	0.4653	4959
ATCAY	0.6732	947	0.0595	663	-0.5422	7801	0.7554	8036	-0.3142	5822	0.5616	5940	0.8498	90	0.0017	24	0.3305	4697	0.4322	4581	0.2437	4972	0.4581	4892	0.4978	2677	0.2191	2360	-0.3191	6036	0.5777	6151	0.3651	4391	0.3965	4218
CASP3	0.6732	948	0.0907	1019	0.5687	2662	0.2549	2742	0.7679	380	0.0361	435	0.6613	1069	0.1076	1124	0.498	2881	0.2778	2976	-0.3826	6142	0.5752	6095	0.6118	1574	0.149	1693	0.3045	5222	0.4967	5314	0.9005	29	0.0022	25
TTLL1	0.6731	949	0.0595	660	0.7245	1077	0.0835	865	0.6064	1811	0.1285	1471	0.6647	1037	0.0703	751	-0.3309	5855	0.5633	5958	0.5418	2117	0.1581	1755	0.8116	186	0.0055	80	-0.6666	9568	0.9332	9905	-0.5105	7698	0.7513	8013
MAST4	0.673	950	0.0595	662	0.5818	2514	0.2099	2213	0.5443	2470	0.1922	2097	0.3169	4763	0.4392	4650	-0.5545	8286	0.821	8643	0.5846	1682	0.1216	1324	0.449	3172	0.276	2894	0.4314	3956	0.3495	3779	0.6107	1724	0.1346	1422
PPTC7	0.673	951	0.0595	664	0.4925	3436	0.2994	3214	-0.6029	8889	0.8778	9273	0.4715	3073	0.2596	2763	0.6143	1692	0.1155	1349	0.4571	2963	0.2484	2647	-0.3537	5926	0.5777	6078	-0.416	6994	0.6824	7242	0.7503	522	0.0273	330
XPOT	0.673	952	0.0596	665	0.8105	461	0.029	329	0.5599	2307	0.1735	1918	-0.3606	6133	0.5934	6283	-0.4969	7666	0.7624	8011	0.841	95	0.0016	19	0.3195	4611	0.4285	4494	0.2702	5430	0.5062	5401	0.6982	894	0.0552	625
CCNI	0.673	953	0.0596	666	0.2766	5198	0.484	5146	0.5158	2764	0.2257	2425	-0.5932	8822	0.8662	9185	0.4994	2865	0.235	2550	0.4857	2641	0.2165	2327	0.2909	4840	0.4504	4739	0.565	2409	0.1873	2047	-0.5447	8065	0.7883	8401
SLC18A1	0.6729	954	0.0908	1020	-0.8038	10141	0.954	10163	-0.4595	7341	0.6865	7238	0.6057	1617	0.1625	1779	0.5547	2293	0.219	2408	-0.301	5355	0.5058	5370	-0.417	6687	0.6232	6581	0.6382	1578	0.1513	1648	0.3401	4604	0.4419	4694
PSME1	0.6728	955	0.0597	667	-0.4824	7233	0.7005	7453	-0.2725	5546	0.5307	5605	-0.5811	8664	0.8546	9042	0.7686	389	0.0159	214	0.7285	518	0.0256	302	-0.3489	5886	0.5719	6022	0.4093	4183	0.3752	4040	0.807	249	0.0101	103
EHMT2	0.6727	956	0.091	1025	0.7789	659	0.0677	716	-0.471	7461	0.6982	7340	0.4622	3184	0.3076	3265	0.7644	404	0.0379	430	0.802	176	0.017	203	0.3546	4275	0.417	4356	-0.6281	9194	0.86	9122	-0.5225	7819	0.724	7744
SLC4A1AP	0.6726	957	0.091	1023	0.7096	1229	0.1197	1294	0.4469	3514	0.3426	3649	-0.4139	6750	0.6289	6688	0.6801	1052	0.0936	1087	0.2385	4983	0.475	5055	0.6286	1426	0.1327	1494	0.3268	5054	0.4809	5139	0.3726	4315	0.4155	4397
COL4A3	0.6726	958	0.091	1027	-0.8033	10136	0.9538	10161	0.8258	164	0.0131	165	0.788	255	0.0252	288	-0.4338	6966	0.6496	6878	0.6837	789	0.0773	878	0.3569	4250	0.4155	4336	-0.4735	7610	0.7066	7510	0.4208	3806	0.3639	3870
QRSL1	0.6726	959	0.0599	669	0.3886	4402	0.4008	4279	0.3407	4714	0.4319	4576	0.7268	559	0.0311	357	-0.2686	5428	0.5154	5454	0.5316	2200	0.1671	1848	0.6409	1303	0.0853	1008	-0.8252	10522	0.9966	10619	0.3428	4578	0.4188	4426
LIMS1	0.6726	960	0.1463	1650	0.6413	1905	0.2314	2475	0.746	515	0.087	1026	0.7061	701	0.1176	1247	0.2451	5219	0.4931	5215	-0.5085	7612	0.6455	6827	0.4499	3160	0.358	3755	-0.4119	6943	0.5971	6377	0.5371	2558	0.3091	3280
ST8SIA4	0.6726	961	0.091	1026	-0.3902	6322	0.5937	6316	-0.3735	6372	0.6021	6366	-0.4675	7376	0.6845	7274	-0.309	5660	0.5326	5650	0.6393	1183	0.1148	1265	0.4814	2828	0.2788	2922	0.6089	1890	0.1835	2007	-0.496	7570	0.6969	7445
PIM3	0.6725	962	0.2367	2599	-0.9129	10577	0.9639	10269	-0.6502	9421	0.7341	7731	0.7448	452	0.1629	1783	-0.7212	9987	0.81	8523	0.6884	754	0.2175	2337	0.8523	85	0.0588	710	-0.52	8076	0.6143	6553	0.7718	417	0.1426	1518
PRNP	0.6725	963	0.091	1022	0.809	469	0.0474	508	-0.3134	5819	0.5481	5796	0.6019	1666	0.1666	1820	0.5522	2321	0.2215	2437	-0.4733	7239	0.6724	7101	0.5991	1692	0.1613	1802	-0.6503	9409	0.8806	9346	0.4973	2986	0.2904	3070
PAK1IP1	0.6724	964	0.091	1024	0.7985	541	0.0531	573	-0.4324	7033	0.6588	6941	0.8756	48	0.0041	48	0.7512	476	0.0449	517	0.6107	1463	0.1394	1553	0.8502	91	0.0072	101	-0.4706	7579	0.703	7471	-0.2589	5356	0.5053	5396
DIRAS1	0.6723	965	0.1466	1654	0.5372	3010	0.3283	3535	0.6847	1008	0.1431	1616	0.8947	32	0.0071	89	0.5766	2078	0.2634	2843	-0.5449	8063	0.6849	7226	0.7712	350	0.0606	733	-0.5685	8595	0.7323	7763	0.7603	469	0.0815	863
PPP2R1A	0.6722	966	0.2371	2605	0.9827	7	0.0029	47	0.5903	1977	0.3314	3531	-0.3818	6362	0.5252	5568	-0.3034	5625	0.5019	5301	0.9349	9	0.0111	134	-0.893	10621	0.9692	10287	0.6004	1987	0.3299	3547	0.3171	4819	0.4882	5189
KRTAP13-4	0.6722	967	0.0913	1030	0.6071	2257	0.2192	2312	0.3207	4888	0.4694	4975	0.6644	1040	0.1051	1095	0.5146	2721	0.2607	2807	0.2921	4743	0.4537	4834	0.703	791	0.0701	838	0.5802	2221	0.2162	2349	0.5789	2082	0.2062	2205
MYO3A	0.6721	968	0.06	670	0.7248	1074	0.0831	862	-0.629	9205	0.9017	9569	0.635	1286	0.0949	988	-0.6541	9383	0.9225	9779	0.7148	593	0.0305	369	0.5281	2353	0.1878	2048	0.3733	4592	0.4169	4466	0.4309	3690	0.3238	3461
DCLRE1B	0.6721	969	0.06	671	-0.7119	9463	0.9131	9714	0.6675	1195	0.0728	855	-0.5855	8721	0.8584	9087	0.761	425	0.0174	232	0.4661	2861	0.2384	2550	0.6373	1346	0.0883	1039	-0.5567	8472	0.8338	8848	0.579	2080	0.1641	1734
COX6B2	0.672	970	0.0914	1031	-0.4895	7288	0.6776	7191	0.6714	1154	0.1049	1219	0.5284	2469	0.2399	2572	0.5582	2256	0.2156	2370	0.5339	2182	0.2119	2284	0.6752	1037	0.0919	1074	0.362	4730	0.4515	4826	0.7179	752	0.0744	810
CYP2C8	0.6715	971	0.0921	1042	-0.5209	7600	0.7041	7485	-0.4883	7663	0.7169	7548	0.6584	1095	0.1104	1155	0.3526	4486	0.4326	4588	0.4127	3514	0.3382	3650	-0.3203	5625	0.5306	5589	0.5661	2389	0.2327	2532	0.8655	71	0.0069	72
TTN	0.6714	972	0.0603	672	-0.7285	9608	0.9248	9837	0.4245	3783	0.3326	3546	0.6171	1491	0.1103	1152	-0.8195	10494	0.9961	10604	-0.3621	5905	0.5712	6042	0.3153	4647	0.4319	4527	0.6349	1609	0.1152	1274	-0.41	6614	0.6351	6794
PCDHB12	0.6712	973	0.0922	1045	0.6364	1959	0.1892	2026	0.8186	181	0.0153	188	-0.3524	6044	0.569	6029	-0.3197	5760	0.5398	5728	-0.5102	7629	0.7131	7516	0.6891	912	0.0805	955	-0.3402	6212	0.5811	6194	-0.4869	7479	0.6885	7369
MR1	0.6712	974	0.0604	673	0.7121	1210	0.0931	981	0.5769	2125	0.1577	1759	0.459	3218	0.275	2899	0.6544	1308	0.0799	960	0.6721	894	0.0544	626	0.4448	3224	0.28	2937	-0.7319	10070	0.9698	10306	0.3238	4752	0.4356	4627
MKL1	0.6711	975	0.0924	1048	-0.7174	9521	0.8916	9454	0.4283	3744	0.3612	3847	0.8306	137	0.0111	134	0.4894	2972	0.2866	3083	0.4555	2977	0.291	3128	0.4732	2925	0.2872	3006	0.327	5053	0.4807	5138	0.7474	542	0.0552	622
USP9Y	0.6711	976	0.0605	676	-0.615	8503	0.8314	8802	-0.7597	10258	0.9803	10434	0.5134	2643	0.2112	2288	-0.499	7698	0.7646	8033	0.6925	728	0.043	494	0.5967	1717	0.1227	1375	-0.6137	9059	0.8897	9446	0.6817	1042	0.0699	759
GGA3	0.6711	977	0.0924	1047	0.6904	1428	0.1377	1487	0.6038	1840	0.1722	1900	0.42	3679	0.3551	3781	0.7951	282	0.0233	289	0.7633	328	0.0311	381	0.6696	1081	0.097	1121	-0.445	7288	0.6771	7192	0.332	4676	0.4477	4750
DCT	0.6708	978	0.0605	675	0.7934	574	0.0365	407	0.2752	5178	0.4849	5130	0.2811	5033	0.4657	4941	0.5046	2821	0.2297	2503	0.3714	4007	0.3521	3781	0.5749	1925	0.1411	1599	0.554	2559	0.1998	2190	0.5225	2714	0.2236	2395
COPZ2	0.6708	979	0.0605	674	0.4967	3394	0.2943	3158	0.3929	4176	0.3725	3967	0.6851	862	0.0546	569	-0.4052	6639	0.6482	6866	0.754	374	0.0156	182	0.7009	812	0.0434	531	0.4838	3361	0.2867	3089	-0.2319	5289	0.496	5284
GGT7	0.6704	980	0.1487	1673	-0.8081	10164	0.9266	9856	-0.3634	6270	0.5556	5875	0.5367	2370	0.2935	3116	0.799	264	0.0462	533	0.5118	2387	0.2931	3148	-0.4445	7018	0.5988	6294	0.6675	1252	0.1797	1968	0.542	2513	0.3045	3239
CYP46A1	0.6704	981	0.0608	678	0.4042	4267	0.3868	4132	0.4735	3206	0.2748	2916	0.77	330	0.0147	174	0.4104	3870	0.3412	3680	-0.5569	8233	0.8176	8615	0.6335	1378	0.0914	1066	-0.4769	7643	0.7543	7971	0.5371	2559	0.2061	2204
TGM3	0.6702	982	0.0609	679	-0.5583	7946	0.772	8211	0.7038	827	0.0456	544	0.5296	2453	0.1927	2101	0.4005	3963	0.3522	3796	0.4875	2620	0.2143	2301	-0.3664	6065	0.591	6209	0.7329	680	0.0361	405	0.54	2535	0.2035	2183
FBN3	0.6702	983	0.0609	680	0.5114	3253	0.2818	3024	-0.2842	5611	0.5386	5688	0.212	5231	0.4922	5203	0.484	3026	0.2501	2708	0.5096	2405	0.1904	2070	0.7779	317	0.0119	162	-0.6001	8925	0.8762	9301	0.2342	5212	0.4852	5163
ACVRL1	0.6701	984	0.1489	1679	0.8251	393	0.0605	645	-0.3792	6430	0.5679	6009	0.8813	42	0.0098	127	-0.6999	9823	0.8648	9152	0.3687	4034	0.42	4480	-0.3547	5946	0.5298	5573	0.7619	480	0.0812	900	-0.6044	8708	0.748	7990
PDIA2	0.67	985	0.2394	2626	-0.5601	7960	0.63	6719	0.4601	3354	0.4294	4550	-0.3853	6410	0.5271	5587	0.7012	876	0.2149	2364	0.7647	318	0.1346	1491	-0.3939	6383	0.525	5529	0.6156	1816	0.3153	3387	0.7099	805	0.2095	2244
LZTS1	0.6699	986	0.0941	1061	0.7726	704	0.0718	755	0.5719	2187	0.2072	2254	-0.2781	5450	0.5168	5469	-0.5767	8537	0.8013	8431	0.4189	3441	0.3326	3578	-0.4004	6466	0.6064	6389	0.7398	627	0.0599	672	0.3757	4293	0.4127	4362
RIMS2	0.6697	987	0.0613	683	-0.5466	7844	0.7597	8087	0.4644	3304	0.2863	3023	0.349	4484	0.4077	4333	0.4721	3163	0.2657	2874	-0.341	5685	0.5469	5810	0.4271	3419	0.3021	3161	0.37	4634	0.4199	4497	0.4719	3259	0.278	2947
PCSK5	0.6696	988	0.0613	682	0.4258	4054	0.3652	3901	0.7851	291	0.0116	151	0.6043	1632	0.1207	1281	0.4906	2957	0.2438	2636	-0.5103	7631	0.7634	7996	-0.4137	6637	0.6517	6901	0.685	1082	0.0705	786	0.5656	2259	0.1772	1895
SCN4A	0.6695	989	0.0614	685	-0.3291	5803	0.5567	5902	0.5882	1995	0.1469	1646	-0.3282	5817	0.5601	5922	0.5845	1993	0.1445	1642	0.6007	1541	0.1082	1200	-0.495	7590	0.7548	7975	-0.2644	5695	0.5402	5755	0.7001	876	0.0545	611
HHAT	0.6692	990	0.0617	688	0.5253	3132	0.2697	2896	0.593	1950	0.1422	1607	0.5931	1780	0.1314	1416	-0.6595	9434	0.9258	9824	0.4531	3006	0.2519	2688	0.3474	4336	0.3988	4153	0.5249	2904	0.236	2566	0.3925	4121	0.368	3914
MS4A4A	0.6687	991	0.1506	1711	0.9129	99	0.0146	181	-0.6032	8893	0.7676	8065	0.6842	874	0.1393	1513	-0.3291	5831	0.5216	5519	-0.3475	5756	0.5135	5471	0.6564	1178	0.1655	1843	0.2856	5350	0.5004	5346	0.5363	2566	0.3094	3284
PRSS38	0.6683	992	0.0957	1068	-0.8154	10220	0.9604	10229	-0.6951	9834	0.9193	9774	0.5897	1818	0.1781	1945	0.6065	1773	0.1661	1857	0.5592	1931	0.1887	2050	0.5352	2274	0.2241	2407	-0.3845	6657	0.62	6625	0.6026	1833	0.182	1970
RAB23	0.6681	993	0.0625	689	0.728	1048	0.0799	840	0.5767	2127	0.1578	1760	0.4573	3242	0.2764	2928	0.6738	1115	0.0671	794	0.5846	1684	0.1217	1327	0.7598	415	0.0166	219	-0.5403	8291	0.8172	8651	-0.7574	10101	0.9711	10329
ACOT2	0.6681	994	0.241	2635	0.4608	3727	0.4289	4576	0.638	1490	0.2854	3013	-0.3239	5794	0.5055	5344	0.5905	1931	0.3248	3526	0.6902	742	0.2153	2308	0.8316	135	0.0766	917	-0.8008	10439	0.8982	9534	0.7078	821	0.2113	2262
ZFHX4	0.668	995	0.0959	1070	0.56	2759	0.2642	2833	-0.2589	5474	0.5218	5496	-0.6371	9275	0.8691	9210	0.7556	450	0.0427	487	-0.4262	6661	0.6206	6585	0.5655	2009	0.1947	2110	-0.4417	7251	0.6733	7149	-0.3638	6112	0.5699	6084
SCRT1	0.6679	996	0.151	1718	0.4478	3849	0.3941	4211	0.6766	1091	0.1533	1701	0.6977	764	0.1268	1355	0.825	171	0.032	372	0.5677	1847	0.2495	2659	0.6334	1380	0.1919	2086	-0.6468	9371	0.8128	8600	-0.7092	9778	0.8584	9100
UBTF	0.6679	997	0.0961	1072	0.7097	1227	0.1197	1293	0.5697	2201	0.2094	2277	0.7406	474	0.0487	505	-0.7099	9902	0.9293	9857	-0.7032	9826	0.9255	9782	0.3356	4445	0.4345	4552	-0.4676	7541	0.7004	7432	0.4058	3960	0.3822	4058
FKBP8	0.6679	998	0.0961	1071	0.5284	3087	0.2929	3141	0.7011	853	0.0775	918	0.3299	4642	0.4483	4721	0.6703	1153	0.1031	1200	0.468	2834	0.2774	2968	-0.5275	7984	0.743	7860	-0.4688	7557	0.7013	7446	0.7616	464	0.047	537
BID	0.6677	999	0.0962	1073	0.87	203	0.0204	234	0.4793	3141	0.3066	3250	0.3259	4677	0.452	4768	0.554	2302	0.2198	2417	-0.4223	6619	0.6174	6546	0.5587	2053	0.2024	2177	0.7845	346	0.032	355	0.6807	1053	0.105	1097
RNASE4	0.6677	1000	0.0962	1074	-0.9348	10622	0.9963	10622	-0.6432	9346	0.8741	9231	0.5011	2770	0.2675	2842	0.8398	122	0.0097	132	0.4923	2563	0.2506	2669	0.6218	1478	0.1392	1583	0.621	1756	0.1704	1862	0.7286	664	0.067	733
F7	0.6675	1001	0.0629	690	-0.7333	9639	0.9281	9870	0.4634	3317	0.2882	3035	0.8003	223	0.0076	95	-0.7219	9993	0.9645	10254	0.3659	4071	0.3585	3852	0.3118	4672	0.435	4559	0.6521	1406	0.0988	1074	0.4175	3842	0.3392	3608
CYP1A2	0.6674	1002	0.0629	691	-0.2871	5533	0.5301	5594	0.3351	4778	0.4377	4648	-0.5514	8313	0.8222	8712	0.4594	3297	0.2804	3001	0.6453	1116	0.0731	827	0.5656	2007	0.1489	1692	0.5511	2589	0.2039	2243	-0.7679	10167	0.9754	10384
MED20	0.6674	1003	0.0963	1076	0.3088	5034	0.4781	5089	0.809	218	0.0184	232	0.6466	1196	0.1214	1291	0.8251	170	0.0129	178	-0.6347	9142	0.8592	9062	0.7833	289	0.0261	323	-0.4439	7277	0.6764	7183	-0.5946	8615	0.7998	8509
GRK5	0.6674	1004	0.0963	1075	0.7877	606	0.0611	654	0.4176	3860	0.3739	3979	-0.2987	5598	0.5264	5584	0.5048	2817	0.2717	2914	0.4493	3044	0.297	3198	0.6666	1103	0.0994	1142	0.4864	3331	0.3181	3421	-0.7775	10215	0.9602	10201
HLA-DQA1	0.6672	1005	0.0631	694	-0.5425	7802	0.756	8044	0.3304	4811	0.4426	4696	0.4298	3561	0.3107	3294	0.5318	2528	0.1973	2189	0.2828	4792	0.4379	4667	-0.3335	5740	0.5558	5855	0.4119	4161	0.3731	4019	0.4442	3546	0.3096	3286
ITGB7	0.6672	1006	0.0966	1078	-0.6104	8464	0.7901	8406	0.5829	2042	0.1963	2138	0.6757	949	0.0947	986	0.4007	3957	0.3819	4070	0.5114	2389	0.2339	2499	0.623	1463	0.1381	1566	0.2976	5273	0.5015	5361	0.5862	2001	0.1988	2141
ZNF311	0.6672	1007	0.0966	1079	0.4809	3551	0.3342	3603	-0.3771	6415	0.6048	6389	0.4342	3508	0.3395	3604	-0.2546	5373	0.5103	5400	0.6566	1020	0.1008	1135	0.5258	2387	0.2337	2511	0.6465	1469	0.1435	1570	-0.5471	8094	0.7499	8010
IRAK3	0.667	1008	0.0967	1081	-0.5362	7741	0.718	7643	0.4837	3102	0.3028	3205	0.6972	769	0.0769	834	0.4748	3130	0.3001	3237	0.7018	659	0.0645	726	0.7881	266	0.0245	303	0.4785	3427	0.3267	3509	-0.6524	9212	0.8614	9137
HNRNPL	0.6668	1009	0.1527	1732	0.3583	4677	0.4582	4882	0.3483	4650	0.463	4901	0.6827	891	0.1411	1542	0.7347	577	0.0945	1096	-0.5565	8226	0.6993	7379	0.8333	128	0.0277	342	0.8178	193	0.04	440	0.2929	4977	0.4802	5121
ECHDC2	0.6668	1010	0.0633	698	0.4252	4059	0.3653	3907	0.7761	342	0.014	176	0.6259	1396	0.103	1066	0.3767	4226	0.3798	4054	0.314	4570	0.4146	4442	0.5943	1744	0.1241	1397	0.3049	5218	0.4831	5155	0.6332	1507	0.1129	1190
NMNAT2	0.6668	1011	0.0633	697	0.2456	5293	0.4975	5280	-0.3415	6060	0.585	6179	0.549	2236	0.1719	1876	-0.4908	7603	0.7548	7941	0.5845	1686	0.1218	1328	0.4165	3551	0.3151	3295	0.4633	3593	0.3103	3346	0.7422	572	0.0309	363
KCNMB4	0.6667	1012	0.1529	1736	-0.8306	10310	0.9429	10031	-0.522	8046	0.6875	7244	0.2649	5118	0.4886	5171	0.89	40	0.0078	115	0.4937	2551	0.3081	3326	0.638	1335	0.1864	2035	-0.7858	10385	0.9415	10016	0.3476	4536	0.4546	4821
HERPUD1	0.6665	1013	0.0972	1089	0.8273	380	0.0375	418	-0.3513	6159	0.5804	6136	0.575	1965	0.1935	2113	0.4856	3012	0.2902	3122	0.6815	807	0.0788	895	0.6121	1570	0.1487	1687	-0.6093	9013	0.8436	8953	0.3076	4879	0.4643	4950
C11orf30	0.6665	1014	0.0972	1091	0.2597	5257	0.5008	5301	0.3566	4556	0.44	4670	0.4901	2870	0.281	2975	0.4345	3614	0.3441	3700	0.3533	4194	0.4042	4298	0.7777	318	0.0286	359	0.3937	4356	0.4206	4510	-0.3699	6173	0.5753	6156
VPS13B	0.6664	1015	0.0972	1088	0.7867	609	0.0621	659	0.7699	376	0.0349	431	0.7145	648	0.0653	696	0.5102	2774	0.2644	2856	-0.4096	6464	0.6016	6390	0.629	1423	0.1323	1491	0.6465	1470	0.1435	1568	-0.713	9812	0.9151	9730
SLCO1B3	0.6664	1016	0.1529	1737	0.6116	2206	0.262	2817	-0.6072	8928	0.7727	8124	0.2792	5052	0.4848	5123	0.853	96	0.0191	253	0.6368	1202	0.1778	1956	0.6793	1001	0.1403	1593	0.5227	2925	0.3338	3588	0.4498	3496	0.3783	4014
LAMB1	0.6662	1017	0.0972	1090	0.5218	3170	0.2988	3207	0.6047	1827	0.1709	1888	0.2448	5177	0.497	5241	-0.5188	7915	0.7382	7795	0.8031	172	0.0167	196	0.7876	269	0.0248	305	-0.5837	8730	0.8169	8646	-0.6433	9110	0.8511	9037
CLINT1	0.666	1018	0.0638	703	0.7002	1331	0.1028	1091	0.3579	4543	0.4132	4378	-0.2795	5460	0.5197	5500	0.3918	4055	0.3632	3890	-0.2979	5337	0.5049	5364	-0.629	9159	0.9032	9552	0.5522	2576	0.2022	2223	0.7565	493	0.0244	304
FGF13	0.6659	1019	0.0973	1092	-0.8074	10158	0.9564	10183	0.7273	646	0.0602	713	0.863	67	0.0057	66	0.7499	488	0.0451	521	0.3083	4616	0.4423	4714	0.5013	2634	0.2566	2718	-0.6264	9178	0.8588	9099	0.6076	1771	0.1774	1899
KCNH4	0.6659	1020	0.1536	1745	-0.6367	8734	0.7679	8166	0.5516	2395	0.2942	3109	0.7836	274	0.0548	575	0.706	822	0.1214	1409	0.6589	994	0.1552	1717	0.5038	2605	0.3101	3240	0.5603	2473	0.2998	3225	0.4242	3769	0.3985	4237
ZNRF2	0.6658	1021	0.0974	1093	0.7771	672	0.0689	724	-0.5384	8214	0.7688	8083	0.6137	1541	0.1531	1685	-0.3392	5933	0.5557	5885	-0.5083	7607	0.7107	7495	0.7173	692	0.0609	738	0.3386	4943	0.4698	5025	-0.6044	8707	0.8121	8609
ABCD4	0.6656	1022	0.0975	1094	-0.8367	10346	0.9705	10333	-0.2562	5463	0.5207	5484	0.3747	4199	0.4068	4327	0.464	3242	0.312	3369	0.3787	3933	0.3755	4031	0.3808	3998	0.3897	4080	0.8015	262	0.025	275	0.535	2581	0.2536	2693
OR5I1	0.6653	1023	0.0642	706	-0.6265	8611	0.8435	8912	0.6771	1085	0.0647	762	0.5745	1973	0.1489	1625	-0.5616	8362	0.8294	8731	0.484	2656	0.2185	2344	0.3783	4022	0.361	3786	0.7603	493	0.0229	250	0.6458	1382	0.1022	1069
PAPOLG	0.6653	1024	0.0981	1103	0.6913	1413	0.137	1477	0.5406	2502	0.2447	2607	-0.3707	6248	0.5864	6209	0.6477	1376	0.1252	1451	0.4218	3397	0.329	3540	-0.4101	6589	0.6163	6490	-0.4126	6950	0.6465	6862	-0.594	8610	0.7996	8503
GK2	0.6652	1025	0.0983	1104	0.7813	641	0.066	696	0.5568	2339	0.2245	2413	-0.4872	7588	0.7051	7482	0.725	674	0.0604	715	0.6745	869	0.0838	938	0.4387	3290	0.3257	3405	0.6235	1733	0.1668	1830	0.6385	1447	0.1453	1551
FHDC1	0.6651	1026	0.0983	1106	0.5189	3197	0.3012	3237	-0.3018	5732	0.54	5707	0.3349	4599	0.4449	4693	0.5878	1955	0.1834	2047	-0.5077	7600	0.7097	7488	-0.2786	5354	0.508	5357	0.4023	4263	0.4108	4387	-0.4607	7186	0.6631	7112
RAB15	0.6651	1027	0.0643	708	-0.3623	6071	0.5824	6199	-0.5195	8011	0.7955	8372	0.5293	2459	0.1929	2105	0.4236	3745	0.3237	3514	0.6466	1105	0.0724	817	-0.3776	6193	0.6042	6360	0.7612	485	0.0226	246	0.6024	1839	0.1422	1513
FANCF	0.6651	1028	0.0983	1105	0.4896	3465	0.3267	3513	-0.3657	6294	0.5948	6290	0.8063	201	0.0183	218	0.3494	4510	0.4355	4621	0.5956	1577	0.1537	1698	0.7693	363	0.0315	399	-0.7	9844	0.9225	9802	-0.3366	5861	0.5461	5811
ISL1	0.665	1029	0.0644	712	-0.553	7904	0.7664	8157	0.3345	4783	0.4384	4653	-0.3058	5653	0.5404	5728	0.5239	2621	0.2061	2288	0.7008	668	0.0378	442	0.7133	732	0.0367	464	0.5978	2023	0.1532	1664	0.6376	1462	0.1089	1144
SLC19A1	0.6649	1030	0.0645	717	-0.4719	7134	0.6899	7335	0.7536	470	0.0208	261	0.76	370	0.017	202	-0.2888	5541	0.529	5614	0.4288	3308	0.2816	3014	0.7084	760	0.0396	486	0.4042	4243	0.3817	4095	0.3765	4286	0.3847	4090
FAM48A	0.6648	1031	0.0646	718	0.5378	3005	0.2563	2759	0.4044	4031	0.3599	3832	0.3661	4290	0.3865	4114	0.6235	1621	0.1085	1283	0.7307	501	0.0246	288	0.6496	1234	0.0769	920	-0.6286	9198	0.9023	9569	0.3059	4891	0.4501	4769
MBD6	0.6647	1032	0.154	1754	-0.8124	10201	0.9295	9886	0.6664	1203	0.1654	1828	0.598	1715	0.2382	2546	0.6541	1310	0.1759	1977	-0.6561	9372	0.8189	8629	-0.7429	10139	0.9117	9649	0.3532	4809	0.4686	5003	0.9049	25	0.0064	60
SLC22A18AS	0.6647	1033	0.0646	719	-0.3929	6344	0.6111	6502	0.469	3246	0.2813	2969	0.3633	4327	0.3902	4154	0.4781	3094	0.258	2781	0.503	2455	0.1968	2136	-0.3384	5781	0.5603	5905	-0.3899	6698	0.6523	6918	0.8148	218	0.008	89
LILRA4	0.6646	1034	0.1541	1759	-0.4087	6512	0.5739	6102	-0.5372	8202	0.699	7350	0.362	4338	0.4422	4675	0.329	4715	0.4662	4937	0.7572	356	0.0657	737	0.8698	58	0.0128	171	0.6141	1833	0.2427	2637	0.5256	2682	0.3182	3405
OR51B6	0.6645	1035	0.0646	721	-0.7826	10015	0.958	10200	0.4253	3774	0.3315	3537	0.5451	2287	0.1761	1921	0.5572	2267	0.1702	1900	0.5503	2028	0.1501	1665	0.3404	4403	0.4073	4244	0.3243	5082	0.4673	4992	0.5914	1949	0.1525	1629
CSNK1G2	0.6644	1036	0.0986	1109	0.7993	533	0.0528	570	-0.483	7602	0.7111	7495	0.3725	4221	0.4092	4345	0.3141	4818	0.4631	4902	0.4243	3364	0.3258	3493	0.7738	333	0.0298	374	0.3958	4330	0.4186	4479	0.8262	173	0.0168	208
TCF15	0.6643	1037	0.2449	2671	0.7117	1214	0.2248	2397	0.91	31	0.0227	282	0.6723	976	0.2421	2601	-0.5178	7901	0.6003	6356	-0.7313	10047	0.8212	8655	0.6969	833	0.2136	2299	-0.7645	10287	0.861	9133	-0.7871	10274	0.8741	9290
GRHPR	0.6641	1038	0.0648	723	0.6936	1390	0.1076	1152	0.3383	4752	0.4342	4611	0.8107	186	0.0059	71	-0.467	7359	0.726	7672	0.505	2440	0.1946	2114	0.5675	1988	0.1472	1677	0.7183	789	0.0452	507	-0.4061	6574	0.6301	6742
AP1S2	0.664	1039	0.2454	2676	0.972	14	0.0063	87	0.6171	1705	0.3073	3260	-0.5203	7970	0.6014	6385	-0.3611	6158	0.5168	5467	-0.7669	10263	0.8646	9136	0.372	4097	0.4619	4851	-0.7313	10065	0.8232	8746	-0.4878	7489	0.5859	6260
GNPTAB	0.664	1040	0.0648	722	0.513	3239	0.2801	3000	-0.7685	10303	0.9835	10464	0.5364	2373	0.1853	2031	0.682	1038	0.0597	706	-0.525	7822	0.7807	8193	-0.4338	6892	0.6792	7180	0.7208	766	0.0433	484	0.3325	4670	0.4285	4532
IRF8	0.6638	1041	0.0648	724	-0.4627	7036	0.681	7236	0.4688	3251	0.2813	2971	0.5879	1842	0.1351	1472	-0.368	6221	0.6003	6354	0.5275	2238	0.1712	1888	-0.497	7614	0.7575	8002	0.5443	2666	0.2138	2330	-0.5561	8184	0.8005	8517
NFKBIB	0.6637	1042	0.0649	726	-0.6616	8992	0.8745	9275	0.3273	4833	0.4455	4728	0.6036	1642	0.1214	1289	0.8387	131	0.0028	52	0.6932	718	0.0424	483	0.2811	4912	0.4574	4808	-0.5036	7919	0.7823	8269	0.6577	1275	0.0895	958
CCDC12	0.6637	1043	0.1555	1779	-0.598	8338	0.7259	7722	0.5721	2184	0.2744	2913	-0.442	7078	0.6062	6442	0.5269	2585	0.3091	3338	0.2738	4842	0.4701	5010	0.6105	1589	0.2162	2324	-0.4782	7655	0.6541	6939	0.6802	1059	0.1575	1669
MAP3K10	0.6637	1044	0.0992	1116	0.6084	2240	0.218	2300	-0.4286	6983	0.6545	6906	-0.339	5917	0.5548	5880	0.7477	498	0.046	529	0.4767	2729	0.2671	2849	0.4085	3646	0.3568	3735	0.6436	1510	0.1468	1599	-0.5409	8016	0.7439	7952
FOXD3	0.6637	1045	0.0992	1117	0.7524	851	0.0864	902	0.3202	4891	0.4695	4977	-0.721	10022	0.9397	9975	0.5015	2844	0.2742	2942	0.7606	341	0.0329	399	0.6988	820	0.0729	875	0.4039	4246	0.4091	4360	0.419	3830	0.3655	3887
HOXA10	0.6636	1046	0.0651	729	0.3308	4878	0.4501	4796	0.5026	2893	0.241	2573	0.3239	4699	0.4341	4596	0.7056	828	0.0435	495	0.3379	4344	0.3902	4167	0.647	1256	0.0797	947	0.6331	1630	0.1175	1287	0.3618	4415	0.3993	4246
PHGDH	0.6635	1047	0.0652	734	-0.6491	8863	0.8644	9161	0.2808	5148	0.4804	5081	0.5256	2505	0.1982	2157	0.3307	4696	0.4321	4580	0.6581	1009	0.0642	720	-0.6994	9845	0.9566	10156	-0.5372	8253	0.8148	8611	0.76	471	0.0231	288
GPER	0.6634	1048	0.0994	1119	0.4408	3921	0.371	3970	-0.3807	6441	0.6077	6413	0.7319	520	0.0528	551	0.5784	2066	0.1938	2158	0.6852	776	0.0763	862	0.8116	185	0.017	224	-0.393	6727	0.6278	6701	0.6355	1483	0.1478	1578
GJB4	0.6633	1049	0.0652	735	-0.2615	5424	0.5166	5446	0.7177	723	0.0378	454	-0.4099	6700	0.6566	6979	0.598	1865	0.1312	1517	0.6551	1034	0.0657	738	0.5856	1811	0.1318	1484	-0.7424	10142	0.9738	10368	0.6183	1652	0.126	1335
PTPRCAP	0.6632	1050	0.0652	733	-0.504	7440	0.7213	7679	0.5616	2287	0.1719	1897	0.5291	2464	0.1933	2111	0.6121	1707	0.118	1374	0.3154	4558	0.4137	4431	0.6574	1175	0.0711	855	-0.5512	8426	0.8275	8790	-0.611	8771	0.8595	9109
PHOSPHO1	0.6629	1051	0.156	1780	0.8413	314	0.0503	535	0.7031	834	0.125	1440	-0.4162	6786	0.585	6195	0.8135	207	0.0378	429	0.3463	4256	0.4361	4646	0.4807	2831	0.3313	3452	0.5031	3144	0.3483	3760	-0.5196	7794	0.6663	7140
AGPAT1	0.6629	1052	0.1562	1781	0.3748	4535	0.447	4770	0.785	294	0.0542	643	0.3414	4549	0.4566	4843	-0.5582	8321	0.7124	7524	0.3905	3783	0.4028	4285	-0.4547	7130	0.6077	6399	-0.6397	9300	0.806	8519	0.3338	4652	0.4619	4917
ZNF169	0.6627	1053	0.0998	1123	-0.8252	10279	0.9651	10279	0.7485	501	0.0475	569	0.6228	1426	0.1428	1565	-0.6725	9575	0.9	9503	0.6106	1465	0.1395	1554	-0.3611	5995	0.5676	5974	0.4658	3549	0.3408	3672	0.8747	57	0.0053	48
CYP2A13	0.6624	1054	0.1566	1785	0.8873	164	0.0236	264	-0.5059	7869	0.6756	7118	0.7784	292	0.0575	609	0.3474	4534	0.4553	4820	0.5903	1628	0.2275	2432	0.7977	231	0.0441	536	-0.4517	7351	0.6305	6727	-0.7623	10133	0.9083	9659
WFS1	0.6624	1055	0.0658	742	-0.6571	8947	0.8705	9231	0.6249	1617	0.1103	1277	0.5335	2399	0.1889	2057	0.6609	1236	0.0759	893	0.3016	4673	0.4253	4530	0.7687	366	0.0141	192	0.508	3089	0.2559	2780	0.7056	838	0.0511	576
ISCU	0.6623	1056	0.1567	1787	-0.3479	5959	0.5341	5649	-0.7661	10288	0.9278	9868	-0.575	8595	0.7315	7765	0.742	528	0.0886	1042	0.6743	871	0.1384	1542	0.8322	134	0.028	349	0.6398	1554	0.2119	2319	0.4397	3587	0.3856	4101
PRPS1	0.6623	1057	0.1568	1790	-0.6433	8806	0.774	8236	0.6582	1290	0.175	1934	-0.411	6709	0.5805	6148	-0.4354	6992	0.601	6369	0.4132	3504	0.3812	4077	-0.7523	10195	0.9189	9736	-0.6238	9163	0.7899	8339	0.7157	772	0.1212	1288
CMC2	0.6621	1058	0.0658	743	0.5476	2898	0.2466	2664	0.6512	1356	0.0864	1024	-0.6356	9256	0.9109	9619	0.647	1386	0.0871	1027	0.7631	330	0.0136	158	0.3115	4675	0.4351	4562	0.6247	1721	0.1261	1381	-0.4249	6785	0.6524	6988
HELQ	0.6621	1059	0.0658	738	-0.5782	8143	0.7922	8429	0.4793	3140	0.2676	2848	0.3742	4206	0.3771	4017	0.5885	1947	0.141	1601	0.4329	3244	0.2761	2951	-0.5163	7843	0.7794	8226	0.4882	3309	0.2802	3030	0.5397	2538	0.2037	2186
CLTA	0.6621	1060	0.0658	741	0.307	5052	0.4681	4973	-0.4881	7660	0.7606	8004	0.599	1704	0.1259	1345	-0.2978	5586	0.5355	5681	0.7299	508	0.025	291	0.7972	233	0.0076	107	-0.6371	9275	0.9095	9645	-0.3502	5989	0.5704	6093
SLC13A1	0.6619	1061	0.0658	739	-0.5328	7701	0.7466	7944	0.5737	2166	0.1604	1781	0.4621	3186	0.271	2872	0.6501	1355	0.0841	1001	0.5758	1784	0.1297	1431	0.4746	2903	0.246	2622	-0.2619	5687	0.5392	5744	0.8289	159	0.0064	65
SUMO2	0.6619	1062	0.1573	1798	0.6348	1975	0.2397	2585	0.8568	96	0.0174	218	0.4794	2988	0.3416	3630	-0.6856	9694	0.8498	8940	-0.416	6546	0.5653	5996	0.7811	307	0.0551	670	0.3944	4344	0.4407	4690	-0.4838	7442	0.6368	6813
NOX5	0.6619	1063	0.0658	744	0.8266	385	0.0242	270	0.4186	3850	0.341	3633	0.4513	3308	0.2832	2991	-0.3845	6386	0.6207	6565	-0.2597	5132	0.482	5127	-0.3307	5716	0.5538	5828	0.3347	4979	0.4569	4888	0.5555	2372	0.1872	2031
PAN2	0.6618	1064	0.1012	1136	0.8828	173	0.0161	198	0.604	1835	0.1721	1898	0.6823	898	0.0883	933	-0.3869	6425	0.602	6379	0.4686	2825	0.2769	2964	0.7494	468	0.042	514	-0.3076	5941	0.5554	5924	-0.3848	6334	0.5904	6307
SORCS2	0.6617	1065	0.0658	740	-0.2939	5574	0.5334	5641	-0.3844	6482	0.6358	6697	0.6138	1538	0.1121	1190	0.3477	4528	0.4139	4382	0.4043	3618	0.3108	3338	0.6624	1141	0.0676	822	-0.328	6107	0.5853	6243	-0.3081	5634	0.5352	5709
PSMA7	0.6617	1066	0.1013	1137	0.294	5128	0.4874	5185	-0.3379	6029	0.5677	6007	0.5779	1938	0.1897	2070	0.6749	1100	0.0987	1139	-0.3471	5753	0.5372	5710	0.928	8	0.0003	11	0.2662	5453	0.5167	5515	-0.547	8093	0.7498	8009
GPATCH1	0.6616	1067	0.1015	1138	0.5463	2917	0.2779	2983	-0.5175	7991	0.7474	7880	0.5687	2041	0.1994	2174	0.5884	1949	0.1829	2045	0.7073	629	0.0606	686	0.5959	1726	0.1651	1837	-0.5068	7952	0.7408	7828	-0.6293	8968	0.8371	8889
ABCD3	0.6615	1068	0.1017	1139	0.6558	1749	0.1703	1841	-0.8622	10589	0.9949	10586	0.6383	1267	0.1295	1396	-0.5216	7951	0.7418	7829	0.6253	1332	0.1285	1421	-0.4444	7016	0.6525	6911	0.5895	2124	0.2058	2263	0.6697	1138	0.1136	1197
DGUOK	0.6614	1069	0.1018	1141	-0.6973	9336	0.872	9250	-0.3936	6580	0.6201	6539	0.6208	1452	0.1449	1587	0.3618	4389	0.4242	4508	0.6224	1362	0.1307	1446	0.3571	4247	0.4153	4332	-0.4539	7383	0.6856	7284	0.4389	3599	0.3474	3675
OR4C11	0.6613	1070	0.102	1144	-0.2851	5519	0.5232	5521	0.3404	4716	0.4541	4805	0.4378	3461	0.3366	3569	-0.2891	5542	0.5229	5536	0.3974	3696	0.3547	3807	0.6547	1189	0.1093	1237	0.6292	1677	0.1611	1769	0.4835	3114	0.3028	3218
ARPP21	0.6612	1071	0.066	750	-0.5387	7764	0.7521	8000	-0.5307	8133	0.8057	8509	0.3962	3951	0.3514	3731	0.3198	4776	0.4415	4671	0.7755	259	0.0105	125	0.6199	1494	0.1038	1187	0.4993	3183	0.2667	2899	0.5251	2687	0.2207	2371
PNLIP	0.661	1072	0.0662	752	-0.5097	7504	0.7273	7746	-0.6265	9165	0.9	9543	0.4231	3639	0.3192	3382	0.633	1517	0.1009	1170	-0.2324	5070	0.4717	5026	0.6524	1208	0.0748	891	-0.3611	6403	0.6172	6587	0.7542	505	0.0256	314
FLT4	0.6609	1073	0.1584	1813	0.7249	1073	0.1478	1591	0.7838	304	0.0552	657	-0.5583	8401	0.7141	7572	0.4714	3169	0.352	3792	0.6351	1221	0.1799	1979	0.8043	203	0.041	502	-0.5976	8896	0.7626	8063	0.8052	255	0.0479	544
PGLYRP3	0.6608	1074	0.1021	1146	0.4532	3801	0.3616	3861	0.4475	3511	0.342	3643	0.4803	2973	0.29	3070	0.4952	2901	0.2813	3013	0.7364	471	0.0449	512	0.5586	2055	0.2024	2176	-0.474	7617	0.7073	7513	0.651	1337	0.1335	1408
GABPB1	0.6607	1075	0.0667	754	0.4013	4287	0.3892	4152	0.3126	4957	0.458	4854	0.3374	4587	0.4191	4457	0.4566	3332	0.2832	3038	0.7392	458	0.0207	244	0.6613	1150	0.0687	830	-0.3657	6459	0.6223	6646	-0.3475	5961	0.5682	6063
MTERF	0.6606	1076	0.1021	1147	0.6047	2281	0.2218	2339	-0.2529	5451	0.52	5474	0.5734	1987	0.1954	2128	0.544	2401	0.2302	2505	0.4321	3258	0.3164	3396	-0.4735	7348	0.6836	7228	0.645	1484	0.1453	1583	0.6776	1087	0.1078	1128
HUWE1	0.6605	1077	0.0668	755	-0.4504	6901	0.668	7117	0.3155	4932	0.4556	4826	0.6623	1057	0.0715	771	0.7193	714	0.0365	413	0.5163	2340	0.1822	1995	0.7842	286	0.0105	141	0.4162	4114	0.3675	3959	0.4811	3139	0.2682	2816
SMAD7	0.6604	1078	0.2494	2703	0.6648	1668	0.2721	2929	0.6187	1687	0.3059	3237	0.6813	905	0.233	2490	-0.6617	9456	0.7423	7835	-0.4989	7495	0.5752	6094	0.7148	715	0.1934	2099	-0.4795	7677	0.5893	6281	0.6886	979	0.2322	2477
B4GALT7	0.6604	1079	0.1022	1150	0.6682	1635	0.1605	1735	0.6003	1872	0.1761	1940	-0.4217	6853	0.6383	6800	0.8749	63	0.0043	71	0.8286	116	0.0096	113	-0.4433	7007	0.6514	6899	-0.5214	8097	0.7537	7959	0.5657	2256	0.2202	2367
NAPEPLD	0.6603	1080	0.0669	757	0.386	4437	0.4031	4305	0.5184	2735	0.2221	2395	0.5174	2605	0.2069	2244	0.5714	2134	0.1568	1756	0.2564	4921	0.4531	4824	0.308	4706	0.4378	4603	0.2745	5407	0.5036	5371	0.4743	3230	0.2742	2908
POLQ	0.6602	1081	0.1023	1151	0.5328	3049	0.2893	3105	-0.649	9404	0.8798	9290	0.541	2325	0.2273	2433	0.8321	151	0.0112	159	0.8344	104	0.0085	97	-0.271	5300	0.505	5312	0.3624	4725	0.4512	4822	-0.4123	6636	0.6171	6571
JAK2	0.6602	1082	0.0669	756	0.4933	3424	0.298	3197	-0.4403	7125	0.7033	7406	0.484	2934	0.2448	2633	0.2619	5150	0.4803	5086	0.8014	180	0.0056	63	0.5833	1834	0.1337	1506	0.6623	1306	0.0896	989	0.8818	47	0.0007	11
INSM2	0.6601	1083	0.1023	1153	-0.3519	5998	0.5633	5989	-0.5727	8574	0.8047	8496	0.4538	3283	0.3189	3376	0.7596	433	0.0401	467	0.5942	1591	0.1546	1710	0.2359	5090	0.4894	5150	-0.635	9259	0.8658	9194	0.6334	1504	0.1504	1603
KEL	0.6601	1084	0.1023	1152	-0.9071	10565	0.9919	10560	0.6368	1500	0.138	1557	0.4545	3275	0.3178	3369	-0.8167	10484	0.9868	10510	0.4349	3220	0.3131	3357	0.6334	1381	0.129	1444	0.6412	1539	0.1489	1620	0.5042	2911	0.2833	3001
PARN	0.6599	1085	0.0672	759	0.6442	1875	0.152	1634	0.7997	242	0.0088	123	0.3675	4273	0.385	4101	0.3776	4214	0.3787	4040	0.7234	544	0.0276	322	0.7519	450	0.0188	241	-0.5328	8211	0.8099	8561	-0.6065	8733	0.8537	9053
IRS4	0.6595	1086	0.1601	1831	0.7745	691	0.1002	1065	0.4403	3595	0.3906	4171	0.617	1492	0.2165	2339	0.7048	841	0.1225	1423	-0.407	6438	0.5571	5916	-0.3253	5668	0.5113	5397	-0.3729	6543	0.5689	6057	0.4848	3096	0.3492	3704
ALDOC	0.6595	1087	0.0673	760	-0.4723	7136	0.6904	7338	0.4192	3842	0.3401	3617	0.6318	1323	0.0973	1012	-0.3992	6574	0.6406	6780	0.2289	5007	0.4625	4935	0.5228	2409	0.1923	2090	0.7328	681	0.0361	406	0.5213	2722	0.2249	2403
MYL5	0.6594	1088	0.1602	1834	0.7223	1097	0.1506	1614	0.3491	4639	0.4621	4888	0.7046	711	0.119	1255	-0.9057	10646	0.9941	10577	0.358	4150	0.4277	4565	-0.3285	5696	0.5127	5410	0.4651	3561	0.3819	4096	-0.2955	5549	0.5042	5382
DIAPH2	0.6592	1089	0.1031	1158	-0.6236	8589	0.8042	8540	0.6213	1661	0.1558	1725	0.8108	185	0.0168	195	0.665	1203	0.1081	1274	0.857	71	0.0057	64	0.7394	519	0.0476	562	-0.3836	6650	0.6194	6608	0.8436	114	0.0116	126
DNMT1	0.6592	1090	0.1031	1159	0.6334	1990	0.1919	2051	0.7428	530	0.0507	609	0.5545	2181	0.2135	2306	0.6123	1704	0.1606	1804	0.6971	692	0.068	761	-0.3876	6304	0.5932	6227	-0.7195	9983	0.9356	9935	0.2887	5006	0.4765	5082
ZSCAN22	0.6592	1091	0.0675	763	-0.6416	8793	0.8571	9085	0.4377	3623	0.3182	3376	-0.5205	7974	0.79	8339	0.4266	3717	0.3198	3476	0.6919	735	0.0431	495	0.4202	3505	0.3105	3245	0.6313	1654	0.1198	1315	-0.3041	5607	0.5319	5674
MAP4K4	0.6591	1092	0.0675	764	0.3637	4637	0.4229	4524	-0.365	6286	0.6107	6445	-0.4191	6817	0.6667	7114	-0.4317	6942	0.6817	7199	0.5633	1891	0.1388	1545	-0.4405	6973	0.6866	7273	0.6391	1561	0.111	1215	-0.3846	6332	0.6069	6456
ZNF347	0.659	1093	0.1031	1160	0.667	1643	0.1616	1747	-0.6692	9620	0.8985	9522	0.4212	3661	0.3533	3755	0.7506	479	0.0451	524	0.7908	206	0.0215	254	0.6856	943	0.0834	988	-0.3027	5904	0.5527	5892	0.7158	771	0.0754	817
AKAP1	0.659	1094	0.1607	1840	0.6663	1653	0.2064	2183	0.655	1321	0.1786	1962	-0.5958	8854	0.754	7982	0.4932	2926	0.3357	3625	-0.3142	5460	0.4958	5267	0.847	97	0.0213	276	0.5996	1997	0.2596	2826	-0.6526	9215	0.8013	8524
CTPS2	0.6587	1095	0.0676	768	-0.3836	6256	0.6021	6401	0.4607	3348	0.2908	3057	-0.281	5468	0.521	5516	0.8134	208	0.0062	90	0.6363	1207	0.0814	911	0.3707	4108	0.37	3882	0.66	1326	0.0915	1003	0.6295	1544	0.1164	1220
ECHS1	0.6587	1096	0.0676	769	-0.6392	8757	0.8552	9054	-0.6197	9070	0.8943	9457	0.4347	3500	0.3041	3234	0.6875	998	0.0547	649	0.5246	2269	0.1743	1918	0.557	2065	0.1562	1753	0.357	4784	0.4351	4644	0.4877	3075	0.2611	2749
MORN4	0.6586	1097	0.1037	1164	-0.3886	6306	0.5932	6300	-0.5331	8163	0.763	8027	0.2721	5088	0.4869	5157	0.7525	465	0.0444	511	-0.2652	5155	0.4885	5188	0.3342	4462	0.4352	4567	0.751	544	0.0523	591	0.5096	2861	0.2773	2936
GPR142	0.6586	1098	0.0676	766	0.5065	3305	0.2859	3077	0.7082	795	0.0424	515	-0.3697	6231	0.6022	6396	0.4006	3961	0.3521	3793	-0.3705	5998	0.5808	6150	0.7735	336	0.0132	177	-0.3799	6618	0.6382	6801	0.6832	1028	0.0682	740
ABCB1	0.6586	1099	0.0676	770	-0.3739	6158	0.5925	6291	-0.348	6131	0.5919	6258	0.4178	3709	0.3251	3461	0.4682	3200	0.27	2900	0.828	118	0.0027	34	0.4738	2916	0.247	2631	-0.5416	8313	0.8186	8677	0.6944	936	0.0582	658
EIF2D	0.6584	1100	0.0677	771	0.4036	4272	0.3878	4137	0.5489	2432	0.1861	2044	0.5604	2123	0.1618	1770	0.5386	2464	0.1892	2110	0.3727	3996	0.3512	3775	0.7416	508	0.0229	289	-0.723	10003	0.9647	10259	-0.3751	6233	0.5959	6362
RASA2	0.6582	1101	0.0681	774	-0.7111	9456	0.9128	9709	0.388	4246	0.3792	4035	0.6903	817	0.0511	534	0.2772	5067	0.4723	4987	0.6168	1415	0.0961	1078	0.32	4604	0.4278	4486	0.5171	2994	0.2457	2664	0.7271	676	0.0392	453
PITPNM3	0.6579	1102	0.1042	1167	-0.4373	6778	0.6338	6753	0.257	5267	0.5063	5346	0.5959	1740	0.1729	1882	-0.5315	8050	0.7513	7911	0.3443	4278	0.4122	4413	0.556	2074	0.2048	2207	-0.4421	7260	0.674	7157	-0.2842	5475	0.5135	5472
TUBGCP3	0.6579	1103	0.1043	1168	0.588	2462	0.2383	2566	0.7618	419	0.0393	473	0.3682	4262	0.4127	4380	0.6693	1164	0.1038	1214	0.6736	877	0.0847	946	0.4258	3439	0.339	3542	-0.5491	8400	0.781	8249	0.8182	206	0.0187	237
ST8SIA5	0.6573	1104	0.0685	779	-0.5947	8308	0.8084	8584	0.5175	2743	0.2234	2402	-0.3736	6277	0.6065	6447	0.4106	3864	0.3406	3670	0.6464	1107	0.0726	819	0.3467	4346	0.3994	4161	0.5348	2794	0.224	2443	0.376	4288	0.3854	4095
BLNK	0.657	1105	0.0686	781	0.7022	1307	0.1014	1078	0.6254	1611	0.1099	1272	-0.3448	5976	0.5778	6121	0.5038	2827	0.2306	2509	0.5415	2119	0.1585	1761	-0.2767	5341	0.5092	5366	-0.4905	7789	0.7681	8115	-0.7858	10263	0.9825	10438
DDX42	0.6569	1106	0.1629	1875	-0.8741	10479	0.9688	10307	-0.4889	7669	0.6606	6954	-0.3164	5731	0.5141	5443	0.4867	2997	0.3403	3668	0.6421	1156	0.1717	1895	0.7901	260	0.0493	596	-0.6648	9552	0.8321	8838	-0.5516	8134	0.6935	7414
BTD	0.6569	1107	0.0686	780	-0.3382	5883	0.564	6000	0.6054	1822	0.1295	1478	0.771	327	0.0146	171	0.5509	2329	0.1748	1961	-0.4459	6899	0.6795	7164	0.4549	3102	0.2692	2827	0.5309	2842	0.2287	2496	0.6094	1745	0.1355	1438
CLCN1	0.6569	1108	0.1051	1176	0.7413	945	0.0939	992	0.7308	616	0.0572	679	0.4876	2892	0.2836	2998	-0.4756	7451	0.6921	7321	-0.3842	6166	0.5767	6109	0.5324	2308	0.2269	2430	-0.6355	9262	0.8661	9198	0.6449	1390	0.1385	1471
NSDHL	0.6568	1109	0.0686	782	0.4612	3723	0.3281	3532	0.7379	570	0.0279	330	0.6671	1015	0.069	735	-0.5382	8114	0.8059	8473	0.6272	1312	0.0876	983	0.3559	4265	0.3871	4059	-0.5416	8314	0.8186	8676	-0.3545	6023	0.5736	6134
AHCY	0.6568	1110	0.1052	1177	-0.5124	7530	0.6968	7410	0.4312	3708	0.3585	3808	0.7385	486	0.0496	516	-0.4659	7342	0.6817	7200	0.5172	2335	0.2279	2437	0.2232	5109	0.4917	5167	-0.2368	5612	0.5297	5650	0.7199	732	0.0729	793
SEMA6D	0.6566	1111	0.0692	786	-0.8191	10243	0.9769	10398	0.53	2620	0.2085	2270	0.7638	354	0.0163	190	0.7947	284	0.0094	130	-0.4789	7295	0.7206	7591	0.5114	2519	0.2032	2191	0.7251	733	0.0403	441	-0.8528	10538	0.997	10629
MGAT4A	0.6565	1112	0.0695	788	0.3033	5066	0.47	4994	-0.2525	5449	0.5204	5479	0.4818	2960	0.2472	2652	0.5842	1997	0.1446	1644	-0.5348	7950	0.7912	8335	0.4775	2878	0.2432	2594	0.722	758	0.0423	478	-0.3189	5705	0.5438	5785
ARSF	0.6564	1113	0.1057	1181	0.5921	2418	0.2347	2524	-0.2931	5672	0.5355	5650	0.6211	1449	0.1447	1584	-0.3565	6099	0.5726	6039	0.4763	2732	0.2677	2855	0.7017	805	0.0712	858	0.3761	4549	0.4387	4679	0.5529	2399	0.2342	2501
TRUB2	0.6564	1114	0.1057	1179	0.7251	1070	0.107	1144	0.4241	3786	0.3658	3887	0.6852	861	0.0856	913	0.3938	4034	0.3908	4159	0.418	3453	0.3337	3590	-0.3227	5645	0.5321	5611	0.7811	369	0.0338	381	0.7343	626	0.0631	703
TRPM4	0.6563	1115	0.1057	1184	-0.7901	10051	0.9446	10052	-0.6564	9489	0.8862	9366	0.3059	4851	0.4676	4965	0.6386	1461	0.1323	1524	0.3397	4318	0.4169	4454	-0.6049	8898	0.8318	8789	-0.4951	7830	0.7275	7713	-0.3609	6086	0.5674	6048
RPS3A	0.6562	1116	0.1057	1182	0.6063	2265	0.2203	2320	0.6864	988	0.0898	1063	-0.5623	8452	0.7897	8334	0.6618	1225	0.1107	1300	0.4731	2771	0.2715	2899	0.7717	347	0.0306	382	0.3692	4644	0.4448	4740	-0.6485	9170	0.8571	9081
TFPI2	0.6562	1117	0.1057	1185	-0.8472	10395	0.9747	10379	0.3949	4150	0.3999	4265	0.6227	1428	0.1428	1564	0.5569	2272	0.2172	2392	0.6249	1338	0.1288	1424	0.6286	1427	0.1327	1496	0.5609	2460	0.2381	2586	-0.3428	5911	0.5498	5864
IFNW1	0.6561	1118	0.1634	1888	-0.748	9767	0.8762	9294	0.388	4245	0.4345	4618	0.6485	1179	0.1787	1953	0.7794	335	0.0588	692	-0.79	10383	0.9482	10053	0.5438	2189	0.2795	2930	-0.6574	9485	0.8237	8759	-0.6689	9380	0.8171	8673
MAPT	0.6561	1119	0.1634	1890	-0.5869	8233	0.7131	7586	-0.7101	9947	0.8772	9260	0.7529	401	0.0751	817	0.6095	1749	0.2294	2500	0.7305	504	0.0881	992	-0.5218	7907	0.6673	7076	-0.6538	9448	0.8204	8693	-0.5664	8310	0.7082	7573
CNOT3	0.6561	1120	0.1058	1187	0.6104	2216	0.2165	2279	-0.3857	6495	0.6124	6462	0.695	783	0.0782	841	0.7501	485	0.0451	522	-0.4565	7022	0.6536	6910	0.5982	1705	0.1619	1809	0.7383	642	0.0608	680	-0.4114	6628	0.6163	6560
PGRMC1	0.656	1121	0.1058	1188	-0.4581	6988	0.6507	6925	-0.6692	9619	0.8985	9520	0.783	278	0.0267	312	0.3711	4283	0.4144	4389	0.6202	1382	0.1322	1458	0.6072	1619	0.1525	1724	-0.3971	6773	0.6322	6745	0.5476	2460	0.2407	2569
UGT1A4	0.6558	1122	0.1637	1893	-0.3993	6413	0.567	6023	-0.5385	8216	0.7006	7369	0.6657	1025	0.1594	1747	0.8861	45	0.0089	126	-0.3466	5745	0.5127	5461	0.2981	4787	0.4719	4959	-0.605	8978	0.7719	8150	0.5064	2889	0.3346	3572
QSOX1	0.6556	1123	0.0703	790	-0.4293	6710	0.6475	6892	0.4669	3273	0.2832	2990	0.4959	2816	0.2338	2500	0.6517	1338	0.0826	987	-0.3574	5855	0.5634	5986	0.3461	4353	0.4001	4170	-0.3557	6357	0.6106	6526	-0.3805	6291	0.6023	6422
CYP2E1	0.6555	1124	0.164	1895	0.5697	2648	0.3024	3243	0.5552	2352	0.2907	3056	0.4606	3203	0.3571	3807	-0.7313	10062	0.8989	9487	-0.6071	8832	0.7587	7948	-0.7199	9994	0.8895	9399	0.5517	2583	0.3087	3312	-0.525	7849	0.671	7178
HMGA2	0.6555	1125	0.164	1896	0.6404	1917	0.2329	2494	0.7982	246	0.0462	553	0.4774	3016	0.343	3643	-0.467	7358	0.6275	6637	0.6949	704	0.1205	1314	0.6847	957	0.135	1519	0.3527	4816	0.4691	5011	0.6809	1051	0.1569	1659
CRABP2	0.6554	1126	0.164	1897	0.6768	1556	0.1971	2099	0.3618	4506	0.4542	4810	0.307	4840	0.4741	5019	-0.4011	6598	0.5746	6061	0.6852	775	0.1283	1413	0.418	3533	0.3882	4074	-0.3237	6080	0.5348	5693	0.6615	1232	0.1785	1918
TTBK2	0.6554	1127	0.1641	1898	-0.6321	8672	0.7622	8109	-0.6234	9117	0.7881	8303	0.7292	539	0.097	1007	-0.5923	8712	0.7487	7888	0.7883	212	0.047	528	0.4115	3612	0.3944	4125	-0.8217	10509	0.9653	10263	0.7444	560	0.095	1003
BCL2L14	0.6554	1128	0.0704	791	-0.4151	6573	0.6319	6736	-0.2432	5424	0.5169	5439	0.4416	3414	0.2955	3137	0.4706	3178	0.2674	2884	0.6711	904	0.0552	634	0.5207	2427	0.1945	2108	0.5758	2287	0.1743	1916	0.5209	2728	0.2253	2409
RNF32	0.6553	1129	0.1063	1191	0.5734	2596	0.2499	2694	-0.671	9634	0.9002	9545	0.8032	215	0.0196	231	-0.4219	6813	0.6376	6756	0.3605	4120	0.3967	4219	0.5268	2369	0.2326	2495	-0.5491	8401	0.7811	8251	0.5399	2537	0.2481	2639
NR2F2	0.6552	1130	0.0705	795	0.4155	4167	0.3747	4015	0.3144	4948	0.4564	4841	-0.3484	6002	0.5821	6163	0.287	5014	0.4664	4941	0.5535	1998	0.1475	1644	0.7828	295	0.0109	149	0.3525	4820	0.4407	4691	-0.6343	9016	0.8796	9336
ADCY7	0.6552	1131	0.1065	1198	0.6107	2213	0.2164	2277	-0.4936	7719	0.722	7603	0.7427	464	0.0478	497	0.5982	1863	0.1748	1963	0.6136	1446	0.1372	1530	0.459	3065	0.2995	3139	-0.4165	6999	0.6503	6901	0.3545	4476	0.4313	4579
CD226	0.6551	1132	0.1065	1195	0.4818	3540	0.3337	3599	0.3815	4310	0.4152	4402	0.5821	1903	0.1847	2024	0.7924	292	0.0241	298	0.448	3070	0.2985	3218	0.6043	1642	0.1554	1740	-0.5783	8676	0.8121	8593	-0.5028	7635	0.7028	7511
DBH	0.655	1133	0.0705	792	0.7342	1000	0.0757	798	-0.6745	9662	0.9383	9987	0.531	2428	0.1913	2084	0.5076	2795	0.2266	2471	0.6745	867	0.0534	609	0.538	2240	0.1752	1925	-0.3255	6093	0.5832	6217	0.4615	3372	0.2909	3079
TNK1	0.655	1134	0.1065	1197	-0.6283	8629	0.8082	8577	-0.5041	7841	0.7337	7726	0.6255	1400	0.1401	1526	-0.6812	9657	0.9065	9599	0.7994	186	0.0178	207	0.6456	1271	0.1182	1332	0.5377	2757	0.2648	2888	0.4521	3463	0.3334	3557
TNNC1	0.655	1135	0.1065	1196	0.6597	1710	0.1676	1808	0.7075	799	0.0733	859	0.3543	4431	0.4273	4532	0.4942	2921	0.2826	3028	-0.3339	5618	0.5251	5592	0.3419	4387	0.4293	4503	0.5831	2187	0.2118	2318	0.6513	1335	0.1328	1402
VRK3	0.6548	1136	0.0207	241	-0.2705	5451	0.5436	5734	-0.4834	7609	0.8514	8979	0.6435	1221	0.0271	315	-0.2983	5587	0.5792	6111	0.5614	1905	0.0578	655	0.5213	2420	0.0997	1143	-0.4705	7577	0.8448	8965	-0.401	6503	0.704	7527
LOC100128076	0.6547	1137	0.2546	2743	-0.7121	9465	0.7804	8301	0.6158	1722	0.3083	3268	0.9241	15	0.0169	198	0.8005	258	0.1072	1260	0.7831	235	0.1152	1270	-0.7658	10260	0.8655	9166	0.6888	1045	0.2384	2588	-0.4559	7135	0.5668	6033
ADAT3	0.6546	1138	0.1072	1200	0.6167	2156	0.2102	2219	0.8112	206	0.0173	215	-0.4132	6740	0.6284	6682	-0.5378	8111	0.759	7981	-0.5085	7611	0.7108	7496	0.7357	548	0.0495	599	0.4008	4281	0.4123	4400	-0.5725	8369	0.7765	8272
ETFB	0.6546	1139	0.0707	797	0.6647	1669	0.1331	1440	0.4521	3453	0.3015	3182	0.6865	848	0.0539	561	0.2859	5027	0.4673	4952	0.3742	3976	0.3493	3752	0.3227	4583	0.4253	4457	-0.3768	6588	0.6344	6768	0.4945	3022	0.2525	2683
SLC25A47	0.6546	1140	0.2548	2745	0.6772	1551	0.2596	2795	0.6962	906	0.2204	2380	0.6848	868	0.2297	2462	-0.6805	9652	0.7626	8013	0.6238	1348	0.2813	3008	0.4611	3048	0.4091	4260	0.8569	97	0.0626	701	-0.4654	7231	0.5725	6114
CITED2	0.6543	1141	0.0712	803	-0.2637	5434	0.5174	5453	0.8201	176	0.0056	80	0.2507	5161	0.483	5104	0.6626	1221	0.0742	880	0.4427	3132	0.2642	2818	0.6187	1509	0.1046	1196	0.5884	2136	0.1618	1777	-0.565	8290	0.8124	8612
BRF2	0.6542	1142	0.1075	1203	0.7855	616	0.0632	665	0.407	3999	0.3863	4127	0.454	3279	0.3189	3378	0.4697	3186	0.3057	3306	0.3695	4025	0.3859	4126	0.3031	4748	0.4603	4835	-0.7421	10137	0.95	10107	0.5953	1913	0.1898	2057
NPHS1	0.6538	1143	0.1076	1204	-0.443	6831	0.6385	6805	0.763	414	0.0387	469	-0.415	6767	0.6297	6703	-0.3865	6422	0.6018	6377	0.472	2781	0.273	2910	0.7027	797	0.0705	846	-0.5138	8011	0.7467	7891	0.7915	320	0.0295	349
GPR17	0.6537	1144	0.2553	2751	0.357	4687	0.4788	5097	-0.4472	7204	0.5692	6021	0.8772	47	0.0427	453	0.7833	326	0.1248	1446	-0.3452	5724	0.5025	5341	0.4935	2724	0.3842	4027	-0.6395	9295	0.7219	7649	-0.4275	6815	0.5503	5870
PPP4R1L	0.6535	1145	0.1083	1208	-0.5759	8122	0.7567	8053	0.7549	460	0.0438	526	0.5167	2610	0.2517	2696	-0.3402	5943	0.5562	5891	-0.7317	10052	0.9452	10016	-0.4032	6496	0.6092	6417	0.3075	5208	0.4941	5296	0.601	1857	0.1835	1991
PAPSS1	0.6533	1146	0.1085	1209	0.5649	2705	0.2584	2779	0.6215	1658	0.1556	1723	-0.6993	9839	0.924	9782	-0.4761	7458	0.6925	7325	0.7428	434	0.0422	479	0.5212	2421	0.2374	2543	-0.4611	7451	0.6935	7364	0.7837	366	0.0336	405
MS4A12	0.6533	1147	0.1085	1210	0.8968	135	0.0122	145	0.7826	307	0.0286	341	0.5153	2629	0.2535	2711	-0.6731	9581	0.9006	9507	0.7723	271	0.0279	327	0.4474	3189	0.3135	3280	-0.7343	10092	0.9449	10055	0.5906	1956	0.1947	2103
PTRH2	0.6532	1148	0.0721	808	-0.3635	6077	0.5836	6208	0.4058	4014	0.3585	3804	0.7923	247	0.0091	117	0.507	2798	0.2272	2477	0.3252	4457	0.4053	4312	-0.4649	7245	0.7156	7567	-0.4478	7315	0.7209	7638	0.7334	631	0.0354	416
CASP1	0.6532	1149	0.2565	2761	-0.8168	10229	0.8905	9439	0.4094	3968	0.458	4853	0.6202	1457	0.2951	3131	-0.556	8300	0.6332	6698	-0.8101	10476	0.9085	9603	0.4725	2934	0.4015	4186	0.6883	1050	0.2391	2596	0.8893	39	0.039	451
PLXDC1	0.6531	1150	0.1089	1215	0.6269	2061	0.1994	2122	0.3852	4268	0.4116	4369	0.6211	1450	0.1447	1586	0.2982	4932	0.4756	5022	0.578	1762	0.1715	1893	0.4951	2705	0.2626	2768	-0.4801	7685	0.7126	7565	0.2994	4934	0.47	5012
LIMK1	0.653	1151	0.2567	2762	-0.9307	10611	0.9747	10377	-0.8229	10507	0.9177	9746	-0.7781	10363	0.8777	9294	0.3754	4238	0.4665	4942	0.7815	239	0.1169	1285	0.7776	319	0.1255	1413	-0.4633	7479	0.5792	6170	-0.5532	8151	0.6292	6722
ITPR3	0.6529	1152	0.0724	809	0.5887	2454	0.2034	2163	0.3909	4200	0.3745	3985	0.4992	2795	0.2296	2458	0.4349	3606	0.3113	3361	0.2494	4945	0.4562	4862	0.3955	3822	0.3415	3562	-0.3137	5993	0.5736	6113	-0.4586	7166	0.6939	7420
RAD51AP1	0.6527	1153	0.0726	810	0.4554	3785	0.3346	3609	-0.4992	7783	0.7727	8125	0.4817	2962	0.2473	2655	-0.279	5478	0.5222	5529	0.7995	184	0.0061	71	0.6675	1096	0.0648	794	-0.7699	10311	0.9838	10486	0.3468	4543	0.415	4389
FOXA2	0.6526	1154	0.1672	1930	0.3715	4566	0.4496	4787	-0.5827	8669	0.7456	7858	0.2941	4945	0.4796	5078	0.6614	1231	0.168	1875	-0.5103	7632	0.6471	6841	0.5818	1850	0.2461	2624	-0.4595	7438	0.6382	6803	0.7324	638	0.1061	1110
CXCR3	0.6525	1155	0.0728	812	0.366	4608	0.4205	4491	0.2921	5087	0.4731	5017	0.384	4092	0.3667	3905	0.8566	86	0.0014	32	-0.365	5942	0.5745	6086	0.5793	1879	0.1373	1555	0.3128	5175	0.477	5100	0.4429	3554	0.3109	3306
GAPVD1	0.6524	1156	0.1098	1226	-0.3191	5721	0.5392	5702	-0.3769	6411	0.6046	6383	0.4635	3173	0.3056	3248	0.3667	4335	0.4185	4435	0.3245	4465	0.4299	4582	0.7327	564	0.0513	617	0.2813	5370	0.511	5453	-0.3751	6234	0.5809	6208
GOT1	0.6524	1157	0.1672	1931	0.7941	569	0.0828	856	0.6777	1082	0.1524	1691	-0.4434	7100	0.6072	6455	-0.3807	6349	0.5573	5902	0.8703	50	0.011	132	0.5398	2226	0.282	2965	-0.4149	6983	0.599	6405	0.4024	3992	0.4161	4400
KIF6	0.6523	1158	0.0729	813	0.9201	87	0.0028	46	0.4269	3757	0.3299	3514	0.5616	2109	0.1604	1758	0.7138	765	0.0395	458	0.6617	972	0.0617	701	0.4147	3574	0.3175	3322	-0.5909	8814	0.8661	9197	0.6991	888	0.055	619
C1GALT1C1	0.652	1159	0.1105	1234	0.3214	4940	0.4697	4989	0.4399	3598	0.3494	3710	0.4484	3335	0.3246	3453	0.7377	558	0.0515	614	0.7196	572	0.0538	619	0.3883	3909	0.3812	4000	-0.6236	9162	0.8562	9078	0.5513	2416	0.2364	2531
OR2T5	0.6519	1160	0.2577	2765	-0.6694	9070	0.7359	7838	0.6223	1646	0.3018	3187	0.463	3175	0.4144	4400	-0.693	9761	0.7761	8167	0.7279	524	0.1755	1934	0.8773	45	0.043	526	0.5922	2089	0.3367	3621	0.8084	245	0.1047	1092
SUCLG1	0.6518	1161	0.0731	815	0.3825	4466	0.4066	4332	0.3882	4242	0.3786	4032	0.5952	1751	0.1296	1397	0.5946	1897	0.134	1549	0.5804	1735	0.1253	1374	0.4101	3625	0.3232	3375	-0.5442	8342	0.8211	8705	0.46	3386	0.2921	3091
SEPHS1	0.6518	1162	0.0213	248	-0.4354	6761	0.7195	7662	0.5583	2326	0.0819	980	0.713	657	0.0076	96	0.4517	3399	0.1938	2156	0.5275	2240	0.0821	923	-0.2908	5418	0.5592	5885	0.2955	5288	0.474	5073	0.5469	2468	0.1015	1058
UBE2U	0.6517	1163	0.0734	819	-0.6363	8731	0.8525	9025	0.4542	3421	0.2992	3150	-0.3101	5685	0.5441	5767	0.696	927	0.0502	591	0.4767	2727	0.2266	2421	0.586	1806	0.1311	1479	0.6503	1427	0.1003	1093	-0.2951	5547	0.5254	5600
ZNF165	0.6517	1164	0.0734	820	0.4148	4178	0.3755	4028	0.5681	2219	0.1658	1835	-0.6267	9164	0.9024	9529	0.3696	4301	0.3882	4130	-0.3447	5718	0.5506	5850	0.4678	2982	0.2537	2700	0.7514	542	0.0266	291	0.7198	733	0.0426	491
ZNF80	0.6515	1165	0.258	2767	0.7208	1116	0.2157	2275	-0.5949	8798	0.6794	7155	-0.51	7859	0.5925	6274	0.8726	66	0.047	546	0.6816	806	0.2253	2408	0.8367	118	0.0723	869	0.6366	1593	0.2936	3172	-0.4314	6859	0.5519	5887
FBXO7	0.6515	1166	0.0736	823	-0.6482	8850	0.8635	9147	0.4535	3434	0.3002	3162	0.6954	781	0.0488	507	0.6049	1788	0.1252	1450	0.5487	2043	0.1516	1674	-0.741	10127	0.9758	10367	0.6027	1960	0.1486	1614	0.7947	305	0.0127	147
GUCY1A2	0.6515	1167	0.0736	824	0.825	395	0.0245	275	0.4862	3065	0.2603	2766	-0.3419	5944	0.5742	6074	-0.4798	7489	0.7406	7817	-0.3601	5885	0.568	6018	0.5129	2508	0.2026	2181	-0.3675	6476	0.6241	6664	0.5359	2570	0.2075	2219
DAP	0.6514	1168	0.1109	1240	0.4218	4089	0.3898	4157	0.5985	1885	0.1786	1961	-0.5942	8834	0.8223	8713	0.3871	4110	0.3976	4222	0.7546	361	0.0357	424	0.4478	3185	0.3131	3271	-0.3589	6386	0.5978	6383	0.7255	686	0.0692	748
PLK4	0.6513	1169	0.0737	826	0.4477	3851	0.3425	3685	0.6085	1797	0.1263	1451	0.4993	2792	0.2296	2457	-0.4391	7038	0.6901	7300	0.6959	699	0.0411	466	0.4517	3139	0.2727	2867	-0.5334	8221	0.8105	8572	-0.2569	5353	0.5029	5359
ATP5G2	0.6513	1170	0.111	1242	-0.6169	8524	0.7973	8470	0.5288	2631	0.2569	2742	-0.2901	5533	0.5219	5527	0.7413	536	0.0504	595	0.5206	2303	0.225	2406	-0.2873	5404	0.5117	5402	-0.4525	7359	0.6845	7263	0.3203	4793	0.4557	4843
DGKE	0.651	1171	0.0741	834	0.5292	3080	0.2651	2849	-0.6486	9398	0.9185	9759	0.8005	221	0.0076	99	0.3502	4506	0.4106	4351	0.5914	1617	0.1161	1279	0.3092	4695	0.4367	4590	-0.3871	6678	0.6487	6887	0.6355	1484	0.1109	1163
PRPF4	0.6504	1172	0.0745	839	0.6732	1590	0.1266	1376	0.6941	920	0.0515	617	0.3786	4154	0.3718	3959	0.2452	5218	0.4884	5177	0.5095	2406	0.1905	2072	0.7137	729	0.0362	454	-0.5075	7960	0.7867	8315	-0.4911	7522	0.7299	7811
MADD	0.6503	1173	0.0748	841	0.7936	571	0.0363	405	-0.4038	6700	0.6574	6929	-0.5646	8481	0.8366	8848	0.418	3792	0.3303	3575	0.7689	293	0.0119	144	0.501	2638	0.2161	2322	0.442	3818	0.3369	3627	0.6974	904	0.0562	635
HSD17B11	0.6502	1174	0.0748	840	-0.2927	5568	0.533	5638	-0.3592	6238	0.6044	6382	-0.6683	9587	0.9364	9924	0.7912	297	0.0104	149	0.5184	2327	0.1793	1972	0.5789	1885	0.1375	1559	0.2977	5272	0.4881	5221	0.3809	4240	0.381	4039
EMD	0.6501	1175	0.1119	1247	0.4622	3715	0.3518	3783	0.6553	1320	0.1193	1379	0.5267	2491	0.2408	2582	0.4645	3235	0.3114	3362	0.3517	4205	0.4054	4313	0.3685	4129	0.4033	4200	-0.2977	5873	0.5497	5849	0.2786	5062	0.4824	5138
CHD1L	0.6496	1176	0.1122	1250	-0.3479	5961	0.5597	5944	-0.3164	5847	0.5506	5825	0.4133	3757	0.3612	3857	0.2684	5113	0.492	5209	0.5936	1597	0.1551	1715	0.6138	1555	0.1471	1676	-0.5249	8132	0.7575	8007	0.7048	842	0.0828	877
SIRPA	0.6495	1177	0.1123	1251	0.522	3166	0.2986	3203	-0.521	8033	0.7506	7906	0.3711	4232	0.4102	4355	0.611	1732	0.1617	1819	0.4918	2570	0.2514	2685	0.2621	5001	0.4824	5075	-0.5966	8883	0.8301	8820	0.7967	291	0.0271	326
ALB	0.6495	1178	0.1123	1252	0.6271	2055	0.1994	2123	0.3885	4237	0.4078	4343	0.6717	981	0.0979	1019	-0.368	6223	0.5835	6163	-0.5339	7931	0.741	7786	0.7341	554	0.0508	612	0.2673	5447	0.5165	5511	-0.4409	6947	0.643	6879
PRSS27	0.6495	1179	0.0757	843	-0.4087	6510	0.6247	6677	-0.3758	6398	0.6236	6580	0.6554	1119	0.0759	828	0.3772	4218	0.3792	4045	0.6799	818	0.0505	565	0.4336	3349	0.2941	3094	-0.587	8766	0.8625	9154	0.5363	2567	0.207	2214
LPP	0.6494	1180	0.0758	844	-0.2643	5436	0.5179	5455	-0.4498	7232	0.7158	7535	-0.3326	5861	0.5628	5965	-0.5764	8531	0.8458	8897	0.437	3192	0.2708	2891	0.4532	3125	0.2707	2848	0.3605	4746	0.4314	4602	0.7201	730	0.0424	487
KIF12	0.6493	1181	0.1124	1254	-0.3468	5948	0.5591	5934	-0.2592	5476	0.5219	5497	0.7368	500	0.0506	526	0.7241	684	0.0606	722	0.5328	2192	0.2128	2290	-0.6552	9444	0.8868	9376	0.3941	4347	0.4203	4505	0.6788	1071	0.1066	1116
TRIP13	0.6488	1182	0.0764	850	-0.819	10240	0.9769	10399	0.6113	1762	0.1236	1420	0.7439	459	0.0224	258	0.6747	1106	0.0665	782	-0.3466	5747	0.5526	5869	0.5343	2283	0.181	1980	0.4406	3844	0.3387	3651	0.4111	3901	0.3469	3671
UBE2S	0.6487	1183	0.1127	1257	0.4099	4212	0.4003	4270	0.3113	4963	0.4756	5037	0.5468	2268	0.2216	2387	-0.7423	10136	0.951	10113	0.6259	1325	0.1279	1410	0.8004	218	0.0202	267	0.5739	2306	0.2241	2445	0.7532	511	0.0516	584
ZRANB1	0.6484	1184	0.1711	1970	0.6486	1825	0.2244	2389	0.6179	1698	0.2255	2420	0.8004	222	0.0438	468	-0.6253	9076	0.7869	8280	0.6931	720	0.1222	1336	0.6146	1546	0.2126	2282	0.771	422	0.0738	812	0.4945	3021	0.3424	3642
NDUFS7	0.6483	1185	0.0765	853	0.4186	4128	0.372	3978	0.7263	654	0.0337	411	0.2007	5235	0.4935	5214	0.3138	4821	0.4471	4735	-0.6305	9095	0.8989	9504	0.7444	493	0.0216	280	0.8514	103	0.0025	34	0.4253	3756	0.3285	3520
FBXL20	0.6481	1186	0.0768	856	0.8452	297	0.0175	211	-0.454	7286	0.7209	7590	0.6244	1414	0.1041	1082	-0.3833	6372	0.6191	6550	0.4721	2779	0.232	2472	-0.359	5984	0.5844	6138	0.5659	2393	0.1865	2034	0.5762	2112	0.1667	1762
ECE1	0.648	1187	0.1136	1266	-0.4003	6424	0.6028	6409	0.3803	4325	0.4167	4418	0.7854	266	0.0258	297	-0.4881	7569	0.7047	7454	0.5782	1761	0.1713	1889	0.6576	1173	0.1073	1220	-0.4433	7269	0.6752	7164	-0.4578	7159	0.66	7074
PBXIP1	0.6479	1188	0.0768	855	-0.5505	7879	0.7635	8127	0.5382	2524	0.1988	2166	0.4524	3295	0.282	2984	0.5697	2151	0.1581	1775	0.432	3261	0.2775	2969	0.3933	3848	0.3441	3599	0.8963	45	0.0004	5	-0.4175	6690	0.6431	6882
ASF1A	0.6478	1189	0.0768	858	0.4229	4076	0.3675	3931	0.3572	4552	0.4136	4388	0.8341	126	0.0029	33	-0.4645	7326	0.7235	7635	-0.254	5114	0.4795	5103	0.5801	1869	0.137	1546	-0.6278	9190	0.9016	9562	0.7956	297	0.0126	146
LPO	0.6476	1190	0.077	860	0.6506	1807	0.146	1566	0.4848	3082	0.2616	2778	0.431	3552	0.3097	3287	-0.5999	8813	0.8692	9197	0.4674	2840	0.2373	2530	0.8154	172	0.0046	72	0.6007	1982	0.1503	1630	-0.6666	9366	0.9119	9700
STK32C	0.6476	1191	0.114	1267	-0.6662	9039	0.8451	8941	0.6412	1458	0.1332	1511	0.5254	2511	0.2416	2592	0.2739	5084	0.4892	5182	-0.6717	9546	0.8991	9506	0.5899	1771	0.1708	1891	0.3655	4688	0.4483	4782	0.7044	843	0.0832	883
USP16	0.6472	1192	0.0775	864	-0.5049	7451	0.7221	7688	-0.2458	5430	0.5178	5448	0.3803	4132	0.3697	3942	-0.3456	5998	0.5785	6106	0.645	1120	0.0734	831	0.5734	1942	0.1425	1617	0.6284	1685	0.1218	1340	-0.4005	6499	0.625	6659
PP2D1	0.6471	1193	0.1145	1277	0.6088	2230	0.2179	2299	-0.7803	10359	0.9733	10346	0.7488	424	0.0446	475	-0.3649	6188	0.5807	6130	0.7236	541	0.0513	575	0.4864	2786	0.2724	2862	0.4584	3641	0.3484	3761	-0.3549	6025	0.5611	5987
PDCD1	0.6471	1194	0.1723	1983	0.672	1601	0.2013	2147	-0.7771	10342	0.9364	9964	0.8595	76	0.016	184	0.6176	1663	0.2204	2423	0.6401	1174	0.1737	1913	0.643	1285	0.1791	1963	-0.5301	8181	0.6961	7389	0.8835	46	0.0115	124
LIPI	0.647	1195	0.0776	865	0.5181	3206	0.2752	2960	-0.2967	5691	0.5471	5781	0.6131	1545	0.1125	1196	-0.5896	8679	0.859	9073	0.3643	4087	0.36	3872	0.3704	4111	0.3704	3888	0.488	3314	0.2803	3033	-0.8877	10600	0.9986	10646
TREML4	0.647	1196	0.0776	866	-0.469	7097	0.687	7292	0.335	4780	0.4378	4650	0.3793	4140	0.3708	3948	0.4196	3772	0.3287	3557	0.4618	2915	0.2428	2592	0.5318	2313	0.1841	2016	-0.6078	8997	0.8842	9377	0.8222	193	0.007	77
HIST2H2AB	0.6469	1197	0.1145	1275	0.552	2851	0.2718	2926	0.5765	2128	0.2019	2205	-0.7239	10040	0.9414	9992	0.3875	4106	0.397	4218	0.4817	2683	0.2616	2782	-0.6195	9042	0.8465	8954	0.6032	1953	0.1898	2084	0.4743	3227	0.3113	3312
DUSP13	0.6465	1198	0.078	870	0.7814	640	0.0424	469	0.3509	4626	0.4215	4484	0.5951	1752	0.1297	1398	0.9374	14	0.0001	4	0.4322	3256	0.2766	2961	0.3046	4736	0.4406	4635	-0.5019	7899	0.7805	8243	-0.3405	5891	0.5625	6000
GABRE	0.6463	1199	0.0782	871	-0.4727	7143	0.6907	7341	0.4512	3466	0.3024	3198	-0.538	8159	0.8086	8531	0.3461	4548	0.4153	4399	0.3956	3721	0.3227	3462	0.3257	4555	0.4222	4426	0.5338	2808	0.2254	2460	0.3205	4790	0.4383	4653
BRCC3	0.6462	1200	0.0784	873	0.302	5079	0.4706	5004	-0.5643	8487	0.8385	8847	0.6384	1266	0.0918	962	0.4662	3213	0.2727	2924	0.586	1664	0.1203	1312	-0.2485	5214	0.4963	5213	0.6768	1159	0.076	844	-0.5387	7994	0.7821	8334
GATA6	0.6462	1201	0.115	1286	-0.4671	7080	0.6578	7011	-0.4171	6852	0.6435	6781	0.4371	3465	0.3372	3578	0.701	878	0.0766	909	0.816	148	0.0133	154	0.8114	187	0.0171	225	-0.4115	6941	0.6451	6854	0.7665	440	0.0441	512
RSC1A1	0.646	1202	0.2631	2818	-0.6021	8381	0.6665	7099	0.9061	35	0.0255	303	0.679	926	0.2346	2505	-0.4356	6998	0.5533	5866	0.7929	203	0.1061	1185	-0.5512	8247	0.6224	6570	-0.7613	10261	0.8585	9097	-0.8631	10555	0.9436	10040
EDN1	0.6459	1203	0.0788	878	0.5103	3268	0.2829	3044	0.4844	3093	0.2621	2787	0.5227	2545	0.2004	2183	0.8346	144	0.0034	57	0.5896	1633	0.1179	1289	-0.3574	5970	0.5817	6118	0.4312	3958	0.35	3787	-0.3177	5693	0.5428	5773
PDIA5	0.6459	1204	0.1152	1288	0.5162	3220	0.3037	3260	0.777	335	0.0308	371	0.3693	4250	0.4118	4368	0.7275	642	0.0589	693	0.5232	2284	0.223	2392	-0.5331	8038	0.7492	7919	-0.8033	10448	0.9818	10462	0.547	2466	0.2409	2573
LMO3	0.6459	1205	0.1734	1986	0.8378	328	0.0533	575	-0.3546	6188	0.5478	5790	-0.5109	7867	0.6657	7093	0.68	1053	0.1477	1674	0.6367	1204	0.1782	1960	-0.3972	6422	0.5594	5886	0.427	4006	0.415	4436	-0.3801	6285	0.5548	5928
TYK2	0.6457	1206	0.1153	1289	0.5016	3343	0.3173	3398	0.2957	5065	0.4885	5152	0.3106	4808	0.4629	4894	-0.4422	7067	0.6584	6958	0.6425	1149	0.1122	1237	0.4627	3029	0.2967	3118	-0.4043	6864	0.6381	6799	-0.3683	6154	0.5741	6137
NCLN	0.6457	1207	0.0789	879	0.4151	4173	0.3751	4020	0.3451	4676	0.4279	4535	-0.3402	5927	0.572	6056	0.5632	2214	0.1639	1841	0.6904	740	0.0439	499	0.3224	4585	0.4256	4462	0.7779	391	0.0162	185	0.4091	3924	0.349	3698
FBXW7	0.6457	1208	0.1154	1291	-0.3769	6187	0.5838	6211	0.8183	183	0.0154	189	-0.4922	7654	0.71	7531	0.7017	868	0.0763	903	-0.552	8165	0.7643	8013	0.4082	3653	0.3575	3746	-0.5983	8905	0.833	8842	0.8347	138	0.014	170
GSTP1	0.6457	1209	0.1154	1290	0.6296	2027	0.1963	2093	0.7638	406	0.0386	464	-0.4231	6864	0.6398	6813	0.8525	97	0.0075	110	0.7929	201	0.0205	238	-0.5153	7831	0.7304	7723	-0.5325	8204	0.7646	8082	0.5563	2357	0.2302	2452
SAFB	0.6456	1210	0.079	881	0.2579	5263	0.4933	5242	-0.4058	6720	0.6612	6962	0.2368	5203	0.4872	5164	0.8422	119	0.0025	48	0.354	4185	0.3719	3993	0.6181	1517	0.1051	1201	-0.3889	6689	0.6508	6904	-0.5315	7919	0.774	8246
CHRNE	0.6456	1211	0.079	880	-0.4375	6781	0.6552	6980	0.2833	5136	0.4791	5070	0.3016	4887	0.4531	4786	0.7701	373	0.0158	210	0.3864	3834	0.3329	3581	0.2619	5003	0.4688	4925	-0.3658	6461	0.6223	6644	0.3329	4666	0.4283	4527
SH3BP1	0.6453	1212	0.1161	1299	0.8377	329	0.0328	360	-0.3361	6014	0.566	5984	0.4444	3383	0.3295	3499	0.4572	3319	0.3216	3488	0.5135	2369	0.2321	2474	0.3807	3999	0.3899	4082	-0.3518	6324	0.5915	6305	0.5037	2917	0.2838	3006
GALNTL4	0.6452	1213	0.0792	882	-0.3109	5664	0.5442	5738	0.4581	3380	0.2938	3101	0.5728	1997	0.1508	1649	0.5438	2404	0.1835	2048	0.5456	2080	0.1544	1709	-0.4079	6562	0.6436	6810	0.5574	2510	0.1961	2152	0.3599	4426	0.4017	4265
MSGN1	0.6448	1214	0.0794	885	0.5107	3261	0.2823	3036	-0.2695	5525	0.5286	5579	0.5988	1706	0.126	1347	-0.5229	7966	0.7898	8314	0.5054	2437	0.1941	2112	0.4814	2826	0.2387	2552	0.6058	1922	0.1451	1581	0.679	1069	0.0718	786
IKBKG	0.6447	1215	0.0794	884	0.2705	5227	0.4875	5186	0.6105	1774	0.1242	1431	0.7378	493	0.0255	290	0.3029	4900	0.4552	4817	-0.4047	6412	0.6228	6619	0.5071	2575	0.2077	2237	-0.2514	5652	0.5349	5695	0.7099	804	0.0489	549
MYOD1	0.6447	1216	0.0794	886	0.4323	3997	0.3579	3831	0.8602	90	0.0014	32	0.2655	5115	0.4755	5033	0.4991	2869	0.2353	2561	0.3897	3797	0.3287	3534	0.4071	3672	0.3272	3413	-0.703	9863	0.9547	10161	0.5621	2301	0.1809	1957
BUD13	0.6446	1217	0.1166	1307	0.3079	5041	0.4789	5099	0.845	123	0.0086	120	0.5973	1723	0.1713	1866	0.2875	5010	0.4821	5119	0.314	4571	0.438	4670	0.4946	2706	0.263	2773	0.4963	3217	0.3089	3318	0.5697	2205	0.2148	2302
SLC17A7	0.6445	1218	0.0795	888	-0.6349	8708	0.8509	9007	0.5542	2363	0.1799	1973	0.3493	4479	0.4074	4329	-0.4111	6693	0.6565	6939	0.5964	1572	0.1115	1235	-0.6032	8873	0.8741	9257	0.8048	245	0.01	96	-0.3745	6221	0.5957	6358
C4BPA	0.6445	1219	0.1751	1999	0.6449	1863	0.2285	2444	0.7211	697	0.1098	1268	0.5992	1702	0.2362	2532	0.6186	1655	0.2195	2415	0.4307	3276	0.3657	3919	-0.7306	10061	0.8997	9512	0.4423	3813	0.4012	4271	0.7166	763	0.1206	1276
CYP1B1	0.6445	1220	0.0795	887	-0.5117	7519	0.7286	7761	0.4091	3971	0.3556	3764	0.2268	5217	0.4898	5185	0.5381	2471	0.1896	2116	-0.329	5572	0.5346	5674	0.4243	3454	0.3067	3199	-0.676	9658	0.9395	9991	0.5145	2793	0.232	2476
DBNL	0.6443	1221	0.117	1313	-0.7571	9845	0.9209	9802	-0.5909	8751	0.8236	8686	0.7397	479	0.0492	512	-0.3972	6555	0.6129	6501	0.5358	2168	0.2097	2265	-0.5147	7826	0.7295	7716	0.7049	898	0.0843	931	-0.455	7127	0.6576	7038
SIX3	0.6442	1222	0.0796	889	-0.3308	5817	0.5576	5917	0.3267	4837	0.4458	4730	0.5977	1718	0.1268	1356	0.5483	2356	0.1781	1996	-0.2419	5085	0.4744	5051	-0.3438	5835	0.566	5958	-0.5598	8500	0.8368	8879	-0.4114	6629	0.6367	6811
SDF4	0.6441	1223	0.1171	1315	-0.8239	10270	0.9647	10276	0.6704	1165	0.1062	1232	-0.637	9272	0.869	9206	0.5847	1991	0.1871	2089	0.4906	2584	0.2525	2699	0.636	1357	0.1265	1424	0.5007	3173	0.3044	3256	0.2557	5161	0.491	5218
CLNK	0.6441	1224	0.0798	891	0.5615	2748	0.2317	2480	0.3293	4819	0.443	4705	0.6181	1478	0.1098	1145	-0.5673	8434	0.8359	8802	0.3558	4170	0.3702	3975	0.5304	2332	0.1856	2027	0.5961	2045	0.1548	1684	-0.3913	6406	0.614	6536
OR52B6	0.6441	1225	0.2644	2836	0.627	2058	0.3083	3306	0.7274	645	0.1859	2043	0.4521	3301	0.4211	4473	-0.4792	7487	0.5778	6099	0.5785	1756	0.3198	3428	0.5201	2436	0.3671	3849	-0.7096	9916	0.7984	8434	0.6876	989	0.2332	2489
NDUFV2	0.644	1226	0.0799	892	0.5162	3221	0.2767	2973	0.318	4906	0.4527	4789	0.6196	1467	0.1085	1136	0.4475	3444	0.295	3177	0.7042	643	0.0356	422	0.397	3808	0.3398	3550	0.3888	4410	0.4009	4265	0.3859	4193	0.3757	3986
DNM1	0.6439	1227	0.08	893	0.449	3834	0.3408	3670	-0.3142	5823	0.5618	5946	0.6426	1226	0.0865	920	0.6295	1548	0.1032	1203	0.2611	4897	0.4513	4804	0.607	1620	0.1128	1275	0.5209	2950	0.2405	2615	0.4544	3438	0.2977	3158
SHC3	0.6437	1228	0.1177	1320	-0.3873	6295	0.5924	6285	-0.3214	5886	0.5547	5867	-0.5754	8597	0.8029	8479	0.8081	231	0.0188	249	-0.4974	7481	0.697	7359	0.5764	1910	0.1838	2011	-0.4527	7366	0.6849	7269	0.6835	1024	0.1021	1066
CLK2	0.6435	1229	0.1181	1327	-0.3515	5995	0.5627	5984	0.445	3539	0.344	3663	-0.5478	8258	0.7732	8156	-0.4595	7264	0.6761	7137	0.8744	45	0.0035	41	0.4923	2736	0.2663	2806	0.3099	5192	0.4917	5275	-0.3502	5988	0.5569	5955
PRDX6	0.6434	1230	0.0805	897	0.4378	3943	0.3519	3784	0.2472	5298	0.4985	5266	0.6808	912	0.0575	610	-0.3084	5653	0.5443	5763	0.7699	285	0.0115	138	0.6048	1639	0.1146	1300	-0.4101	6930	0.6762	7179	0.511	2844	0.2355	2517
COX8A	0.6433	1231	0.1764	2010	0.7718	708	0.103	1093	0.664	1234	0.1674	1852	0.4643	3157	0.3536	3762	-0.7109	9908	0.8774	9269	-0.5239	7807	0.6625	6994	0.7849	282	0.0521	637	0.7117	836	0.1287	1399	0.5405	2527	0.3062	3259
CD97	0.6431	1232	0.1184	1332	0.3025	5071	0.4825	5132	-0.5363	8189	0.7659	8051	0.4587	3221	0.3127	3313	0.6365	1485	0.1338	1547	0.4884	2608	0.2548	2716	0.3983	3796	0.3702	3886	0.5177	2985	0.2863	3088	0.641	1423	0.1431	1527
DNAJC1	0.6431	1233	0.0806	900	0.2187	5324	0.5024	5312	-0.4613	7361	0.7306	7693	0.6355	1282	0.0947	985	0.5461	2381	0.1799	2021	0.6765	843	0.0523	590	0.5014	2632	0.2158	2319	0.2923	5309	0.4907	5264	0.6488	1366	0.0989	1036
ATP11C	0.643	1234	0.0806	899	0.3621	4648	0.4241	4537	0.5049	2865	0.239	2544	-0.6833	9722	0.9465	10047	0.2639	5133	0.4796	5070	0.3489	4227	0.3779	4049	0.602	1663	0.1176	1325	-0.3631	6426	0.6194	6609	0.5045	2909	0.2423	2579
PCDH12	0.6427	1235	0.1774	2019	0.4342	3971	0.4036	4307	-0.5648	8497	0.7283	7670	0.7389	483	0.0887	935	0.678	1071	0.1494	1699	0.6837	787	0.1299	1434	0.5089	2549	0.3058	3193	-0.6226	9153	0.789	8335	0.6223	1613	0.2256	2413
KLF16	0.6426	1236	0.1774	2021	0.5408	2971	0.325	3497	0.6529	1337	0.1817	1996	0.6768	940	0.1476	1612	-0.3657	6197	0.5454	5782	0.528	2232	0.2824	3024	-0.418	6706	0.577	6074	0.674	1183	0.1709	1868	0.5063	2892	0.3347	3574
B3GNT2	0.6426	1237	0.1189	1336	-0.3021	5625	0.5303	5596	0.4993	2934	0.2869	3028	0.4919	2853	0.2789	2955	0.2756	5080	0.4882	5175	-0.4435	6868	0.6398	6778	0.7464	485	0.0438	532	0.3023	5237	0.4987	5325	0.6256	1575	0.1582	1676
PKDCC	0.6426	1238	0.081	903	0.6348	1974	0.1596	1728	0.6718	1149	0.0681	802	0.7801	286	0.0122	143	0.5797	2046	0.1492	1694	0.7077	624	0.0339	412	0.6775	1018	0.0583	708	0.6861	1065	0.0697	774	0.2861	5031	0.4627	4936
MCM8	0.6424	1239	0.1189	1335	-0.4156	6577	0.6156	6550	-0.4385	7102	0.6651	6999	0.4823	2953	0.2879	3049	0.6458	1399	0.1269	1472	-0.4426	6857	0.6392	6766	0.7231	643	0.0572	691	-0.3885	6684	0.6236	6657	-0.5421	8026	0.7444	7962
SLC35E3	0.6423	1240	0.119	1337	-0.4911	7305	0.6791	7209	-0.503	7831	0.7325	7714	-0.4584	7271	0.6759	7196	0.6784	1066	0.095	1103	0.7311	498	0.0477	534	0.3073	4711	0.4574	4807	0.5471	2634	0.2548	2764	0.3019	4922	0.4684	4983
DPP9	0.6422	1241	0.0811	904	-0.3751	6170	0.5934	6309	-0.2217	5395	0.5112	5396	0.6556	1117	0.0758	824	0.4029	3940	0.3493	3772	0.4967	2522	0.2036	2209	0.6688	1090	0.0639	780	0.407	4219	0.3781	4072	0.5789	2083	0.1641	1732
GPR174	0.6421	1242	0.0813	905	-0.4336	6746	0.6514	6934	-0.5182	7997	0.7943	8357	0.6059	1614	0.12	1270	-0.433	6954	0.6834	7210	0.7646	319	0.0131	151	0.5189	2449	0.196	2127	0.3694	4640	0.4208	4513	-0.2955	5551	0.5256	5601
COL8A2	0.6421	1243	0.1193	1341	0.7496	870	0.0882	922	-0.2408	5421	0.5177	5444	0.8227	154	0.0128	147	0.5943	1902	0.178	1993	0.5461	2070	0.1997	2164	0.6406	1310	0.1231	1384	0.4848	3351	0.3201	3441	0.407	3943	0.3809	4036
PFN1	0.642	1244	0.1781	2025	-0.4729	7144	0.6205	6624	0.8528	107	0.0197	246	0.6547	1125	0.1716	1868	-0.6016	8831	0.7601	7987	-0.7609	10227	0.9244	9777	0.5327	2304	0.2876	3012	0.612	1853	0.2454	2660	-0.4009	6502	0.5698	6082
SMC2	0.6418	1245	0.0815	908	0.6941	1385	0.1071	1145	0.7914	268	0.0107	142	0.3709	4234	0.381	4055	0.3688	4310	0.3893	4140	-0.5526	8176	0.8126	8560	0.8328	131	0.0029	56	-0.4594	7436	0.7351	7781	-0.3337	5840	0.5559	5945
GSX1	0.6416	1246	0.12	1345	0.5079	3296	0.3118	3340	0.6664	1202	0.109	1255	0.2746	5082	0.486	5140	0.6776	1081	0.0955	1113	0.4488	3054	0.2973	3201	0.5456	2169	0.2135	2297	0.5694	2350	0.2282	2490	-0.5238	7836	0.7256	7756
TFCP2L1	0.6416	1247	0.0818	909	0.8676	209	0.0111	131	-0.3759	6401	0.6237	6582	0.7162	634	0.037	402	0.4071	3894	0.3448	3713	0.5149	2359	0.1848	2020	0.3083	4702	0.4378	4601	-0.5091	7974	0.7886	8330	-0.5246	7845	0.7665	8173
GJC1	0.6415	1248	0.12	1347	-0.7658	9915	0.9273	9862	-0.7814	10364	0.9738	10357	0.4996	2788	0.2691	2861	-0.3437	5978	0.5601	5928	0.7244	538	0.051	570	0.5321	2311	0.227	2434	0.6226	1738	0.1683	1846	-0.4066	6582	0.6125	6515
RNF125	0.6411	1249	0.1203	1348	0.4041	4269	0.4066	4330	-0.6107	8962	0.8441	8897	0.6973	768	0.0768	832	0.3699	4295	0.4153	4397	0.7581	350	0.0338	408	0.5724	1949	0.1877	2047	0.4293	3978	0.3793	4080	0.8044	259	0.0235	296
TBX2	0.641	1250	0.0824	913	0.3541	4716	0.4318	4605	0.7728	362	0.0148	184	-0.4718	7426	0.7323	7773	0.4002	3965	0.3528	3805	0.3056	4640	0.4222	4502	-0.4353	6912	0.6809	7203	0.8731	75	0.0011	21	0.6903	967	0.0623	698
NTRK2	0.6409	1251	0.0826	917	-0.3231	5749	0.5526	5830	0.6371	1498	0.0994	1155	0.4715	3074	0.2596	2761	0.3281	4722	0.4341	4608	0.4246	3359	0.2857	3066	-0.3307	5715	0.5538	5827	-0.5721	8621	0.8495	9001	0.5376	2553	0.2053	2197
MAGOHB	0.6406	1252	0.0829	919	0.624	2087	0.1697	1832	0.4378	3619	0.3181	3373	-0.4507	7197	0.7069	7508	0.4768	3110	0.2599	2801	0.757	357	0.0146	172	0.6544	1192	0.0737	881	0.5897	2119	0.1602	1756	-0.4697	7279	0.7057	7548
DUT	0.6405	1253	0.083	920	0.5579	2788	0.2345	2516	0.4577	3386	0.2943	3110	0.7025	728	0.0439	469	0.6878	995	0.0543	646	0.4349	3219	0.2732	2919	0.4415	3257	0.2837	2980	0.478	3432	0.2929	3164	0.4813	3137	0.2682	2815
EIF2AK3	0.6405	1254	0.083	921	0.4581	3752	0.3319	3578	-0.5328	8157	0.8078	8526	0.7433	462	0.0228	264	-0.7009	9829	0.9539	10143	-0.281	5229	0.4937	5242	0.8036	208	0.0065	90	0.4427	3808	0.3353	3609	0.6197	1639	0.1248	1325
LEPROTL1	0.6403	1255	0.1213	1355	-0.6171	8525	0.7974	8471	-0.5265	8085	0.7565	7964	0.718	621	0.062	658	0.5304	2547	0.2436	2633	0.4251	3351	0.3253	3486	-0.391	6343	0.5967	6266	-0.2681	5710	0.5373	5719	0.5182	2756	0.2687	2829
NES	0.6403	1256	0.0832	925	0.6079	2248	0.1854	1997	-0.3899	6539	0.6409	6755	0.6826	895	0.0561	591	0.6376	1474	0.0961	1124	0.418	3454	0.2934	3152	0.5557	2078	0.1577	1768	-0.5481	8389	0.8242	8760	0.6681	1161	0.082	868
BCAT1	0.6401	1257	0.1804	2051	0.2501	5279	0.4968	5268	-0.8118	10477	0.9608	10227	0.6193	1470	0.2144	2317	0.4143	3821	0.4043	4274	-0.3667	5955	0.5254	5595	0.722	653	0.1022	1172	-0.3175	6020	0.5317	5661	-0.5887	8559	0.7304	7815
TRIP11	0.6401	1258	0.1213	1357	0.6073	2253	0.2192	2310	0.4002	4083	0.3938	4204	0.7076	689	0.0701	746	0.3735	4259	0.412	4361	0.4956	2533	0.2474	2632	-0.6453	9337	0.8753	9272	-0.5548	8459	0.787	8319	0.4654	3334	0.3196	3416
TCERG1	0.6401	1259	0.1213	1354	-0.3529	6005	0.5639	5998	0.3696	4431	0.4275	4532	0.7723	319	0.0309	353	0.4291	3688	0.3495	3774	-0.2472	5094	0.4827	5137	0.5694	1971	0.1907	2079	-0.3989	6795	0.6339	6759	0.8362	133	0.0134	162
PRKAR1A	0.64	1260	0.0832	922	0.5128	3242	0.2802	3001	-0.5709	8557	0.8456	8911	-0.3378	5903	0.5687	6022	0.3435	4571	0.4182	4433	0.7074	627	0.034	413	0.6236	1459	0.1002	1149	-0.7567	10233	0.9789	10429	0.5059	2895	0.2406	2565
POLH	0.64	1261	0.0832	923	0.5784	2556	0.2148	2266	-0.2901	5652	0.5415	5725	0.3832	4103	0.3674	3915	-0.6638	9482	0.9299	9862	-0.2419	5084	0.4744	5050	-0.5595	8355	0.8259	8723	-0.3391	6199	0.5941	6338	0.6259	1569	0.1191	1252
TCIRG1	0.6398	1262	0.0832	926	-0.5851	8215	0.7996	8494	0.539	2514	0.1983	2156	0.5982	1713	0.1264	1353	0.356	4446	0.4049	4281	0.6342	1231	0.0825	928	0.3291	4527	0.4191	4390	0.4081	4205	0.3765	4061	0.3678	4357	0.3936	4187
GNA12	0.6398	1263	0.2672	2871	0.3779	4507	0.4699	4992	-0.32	5876	0.5099	5373	0.8355	121	0.0729	793	0.8199	188	0.0866	1021	0.4268	3332	0.4273	4562	0.403	3730	0.4478	4710	-0.5884	8781	0.6711	7135	-0.8594	10550	0.9409	10004
PSTPIP2	0.6398	1264	0.0832	927	-0.3828	6247	0.6013	6396	-0.5205	8026	0.7963	8386	0.7281	547	0.0301	348	0.8553	90	0.0014	33	0.4536	2999	0.2516	2686	0.7501	465	0.0192	250	-0.5239	8122	0.8022	8472	0.5585	2330	0.1837	1996
COL9A1	0.6398	1265	0.1213	1356	0.9614	22	0.0007	13	-0.6688	9615	0.898	9512	-0.3512	6033	0.5678	6013	0.4658	3219	0.3093	3341	0.6755	854	0.0833	934	0.4848	2800	0.2744	2883	0.403	4254	0.41	4373	0.7527	513	0.0522	589
SEC61G	0.6397	1266	0.0833	928	-0.3262	5778	0.555	5869	0.7132	753	0.0395	475	0.5422	2314	0.1792	1966	0.3015	4909	0.4564	4830	0.7222	552	0.0283	330	0.3258	4554	0.4222	4425	-0.4739	7615	0.7509	7928	-0.4234	6774	0.6512	6974
RIMS3	0.6395	1267	0.1808	2057	-0.7647	9908	0.8892	9421	-0.6117	8979	0.7783	8176	0.8239	149	0.0319	365	-0.7695	10295	0.9299	9863	-0.6817	9639	0.8463	8914	0.8345	124	0.0273	337	-0.7559	10227	0.9181	9744	0.4273	3741	0.3956	4209
SLC20A2	0.6395	1268	0.0834	930	0.5442	2933	0.2512	2704	0.4978	2949	0.246	2617	-0.6704	9611	0.9378	9942	0.6062	1778	0.1246	1442	0.4469	3076	0.2592	2760	-0.6176	9025	0.8903	9408	-0.3528	6331	0.6075	6489	0.4423	3564	0.3118	3321
IL20RA	0.6394	1269	0.0835	933	0.6282	2041	0.1664	1791	-0.5526	8365	0.8276	8721	-0.2621	5374	0.509	5389	0.6085	1758	0.1215	1414	0.6047	1510	0.1059	1182	-0.3119	5548	0.536	5637	0.4337	3920	0.3469	3740	-0.4506	7073	0.6834	7311
TRIM11	0.6393	1270	0.0835	932	0.6956	1370	0.1061	1132	-0.329	5958	0.5743	6070	-0.3152	5719	0.5491	5813	0.818	193	0.0054	82	0.4952	2536	0.2052	2225	0.5366	2257	0.1776	1952	-0.6414	9320	0.9133	9694	-0.4912	7524	0.73	7812
CCNK	0.6391	1271	0.0838	936	-0.4586	6993	0.6772	7185	0.2907	5095	0.4734	5025	0.4839	2937	0.2451	2635	0.6897	977	0.0534	634	0.6536	1047	0.0669	748	0.8644	67	0.0008	20	-0.7321	10073	0.9701	10310	0.3928	4118	0.3677	3912
PARP16	0.639	1272	0.084	940	0.8813	178	0.0083	105	0.6474	1396	0.0893	1055	0.4643	3156	0.2683	2850	-0.248	5354	0.5075	5361	-0.2871	5270	0.4971	5285	0.5878	1787	0.1299	1457	0.7352	667	0.035	394	-0.323	5736	0.5467	5820
ZNF668	0.639	1273	0.084	938	0.6548	1757	0.1421	1527	0.456	3400	0.2964	3130	-0.4605	7298	0.7194	7627	0.7549	453	0.0189	251	0.4196	3428	0.2912	3130	0.7083	761	0.0396	485	-0.4069	6895	0.6715	7137	-0.5263	7862	0.7688	8192
SLC9A5	0.6389	1274	0.1218	1362	0.8029	501	0.0509	543	0.5947	1935	0.1831	2010	-0.3117	5693	0.5337	5654	0.6776	1080	0.0955	1115	0.4467	3078	0.2999	3238	0.3777	4028	0.3929	4110	-0.7321	10072	0.9435	10038	0.7797	376	0.0354	418
BCL10	0.6389	1275	0.1218	1363	-0.7437	9740	0.9112	9685	-0.549	8328	0.7795	8196	0.238	5198	0.4987	5267	0.8541	92	0.007	100	0.7375	465	0.0444	505	-0.427	6807	0.6335	6703	-0.7512	10197	0.9553	10172	-0.642	9098	0.8499	9022
TYR	0.6388	1276	0.0843	944	0.4555	3782	0.3346	3604	0.4276	3753	0.3291	3507	0.5527	2198	0.1684	1840	-0.5066	7790	0.7711	8117	-0.4561	7019	0.6934	7328	0.444	3237	0.2809	2943	-0.4138	6968	0.6796	7212	0.7905	327	0.0133	157
GTF3C4	0.6387	1277	0.1219	1366	0.587	2474	0.2389	2576	0.698	879	0.0792	939	0.4522	3298	0.3207	3403	0.2617	5153	0.4942	5225	0.6422	1154	0.1124	1239	0.679	1005	0.0889	1047	-0.4087	6912	0.6425	6836	0.3795	4257	0.4082	4324
SLC41A2	0.6387	1278	0.1219	1368	0.3868	4428	0.4213	4504	0.3988	4103	0.3951	4222	-0.5815	8668	0.8096	8547	-0.4459	7111	0.6619	6992	0.671	905	0.0877	984	0.6346	1371	0.1279	1439	-0.3018	5901	0.5521	5885	0.7224	713	0.0713	774
STX12	0.6386	1279	0.0845	946	0.3212	4942	0.4571	4870	0.7194	707	0.0371	448	0.3338	4606	0.4237	4489	0.5434	2406	0.1839	2052	0.7142	597	0.0305	367	0.4159	3558	0.3164	3308	-0.3434	6240	0.5978	6385	0.2837	5043	0.4638	4944
RAB17	0.6385	1280	0.0846	947	0.7215	1110	0.0852	892	0.5869	2005	0.1483	1652	0.5619	2106	0.1599	1755	0.6439	1413	0.0906	1057	0.5967	1567	0.1112	1229	0.5068	2583	0.2083	2246	0.5289	2861	0.2306	2511	0.234	5213	0.4852	5164
CD274	0.6385	1281	0.1222	1370	0.8303	360	0.0362	403	0.485	3079	0.3014	3177	0.5869	1853	0.1807	1977	0.7307	612	0.0565	667	0.7904	210	0.0217	255	-0.3393	5790	0.5458	5733	-0.7426	10146	0.9501	10110	0.6284	1548	0.1558	1649
EHBP1	0.6384	1282	0.0849	950	-0.2529	5403	0.5137	5417	-0.3798	6432	0.6278	6623	0.5958	1743	0.129	1388	0.3753	4239	0.3818	4069	0.6382	1192	0.0786	892	0.5643	2016	0.1503	1704	0.7097	855	0.0508	573	0.4968	2997	0.2501	2664
FKBP7	0.6383	1283	0.0849	949	0.4081	4230	0.3829	4092	0.5665	2238	0.1677	1855	0.4076	3828	0.3382	3584	0.595	1896	0.1335	1541	0.6155	1422	0.0975	1090	0.64	1318	0.0858	1013	0.3902	4393	0.399	4244	0.5613	2308	0.1815	1961
TIA1	0.638	1284	0.0851	951	-0.3201	5725	0.5503	5801	-0.3424	6070	0.5857	6186	0.415	3738	0.3278	3489	0.6505	1349	0.0841	998	0.4755	2740	0.2279	2436	0.7281	605	0.0293	366	-0.4771	7647	0.7545	7973	0.5309	2617	0.2138	2285
TGDS	0.6379	1285	0.1224	1371	0.4574	3764	0.3582	3833	-0.5571	8396	0.7882	8305	0.7715	324	0.0315	363	-0.3578	6116	0.5746	6059	-0.5433	8046	0.7536	7897	-0.3956	6408	0.6017	6330	0.5714	2324	0.2257	2467	0.2443	5191	0.4937	5250
LOC442075	0.6379	1286	0.1224	1372	0.7796	653	0.0672	710	-0.3474	6121	0.5767	6099	-0.479	7506	0.6953	7395	-0.5129	7849	0.7311	7734	0.7283	519	0.0493	551	0.3856	3944	0.3837	4023	0.5279	2870	0.2748	2977	0.5557	2369	0.2311	2463
HCRTR2	0.6379	1287	0.2692	2888	0.6819	1507	0.2539	2731	0.5721	2183	0.3475	3691	0.6702	988	0.2443	2623	-0.697	9797	0.781	8214	0.5864	1658	0.3135	3361	0.8973	27	0.0309	388	-0.6385	9284	0.7214	7644	0.855	91	0.0638	711
KHDRBS2	0.6378	1288	0.0853	952	-0.5711	8079	0.7852	8350	-0.3956	6606	0.6484	6836	0.3703	4236	0.3815	4059	0.6341	1506	0.1	1156	0.7446	426	0.0185	219	0.6114	1580	0.1097	1247	0.2704	5429	0.5062	5399	-0.3901	6392	0.6133	6522
TNFAIP8	0.6377	1289	0.0855	956	0.492	3442	0.3002	3228	-0.467	7426	0.7364	7770	-0.408	6678	0.6544	6959	0.5225	2635	0.2075	2303	-0.553	8182	0.8128	8563	0.4622	3035	0.2606	2752	0.8072	234	0.0092	93	0.4514	3473	0.301	3199
UNC5C	0.6376	1290	0.0855	955	0.3182	4964	0.4593	4889	0.3214	4879	0.4501	4769	0.6683	1003	0.0681	717	-0.3795	6341	0.6134	6506	0.4184	3448	0.293	3145	0.6289	1425	0.095	1107	-0.3153	6004	0.5747	6122	0.6565	1287	0.0907	972
CYBB	0.6374	1291	0.1839	2076	-0.4032	6465	0.5698	6053	0.7484	502	0.0845	1000	0.7228	586	0.1033	1070	0.7268	648	0.1026	1194	-0.6786	9616	0.8437	8881	0.6605	1152	0.1608	1795	0.3976	4316	0.4366	4663	0.3491	4526	0.4537	4810
RNF41	0.6374	1292	0.0856	957	0.7974	545	0.0344	385	-0.4688	7437	0.7381	7787	0.397	3940	0.3504	3721	0.5084	2789	0.2253	2460	0.365	4077	0.3597	3865	0.6498	1232	0.0765	916	0.5627	2436	0.1897	2081	0.554	2389	0.1888	2045
KPNA4	0.6372	1293	0.1839	2077	-0.7455	9751	0.8744	9274	-0.6269	9175	0.7926	8344	-0.2809	5467	0.5006	5290	0.6616	1226	0.1678	1873	0.6346	1225	0.1803	1982	0.648	1246	0.1745	1922	0.5371	2767	0.3221	3458	0.5735	2158	0.2749	2912
CHRAC1	0.6371	1294	0.1234	1376	-0.5468	7846	0.7292	7769	-0.3999	6651	0.6265	6615	0.6263	1389	0.1396	1516	0.5618	2225	0.2128	2346	0.7634	327	0.0311	382	-0.4394	6962	0.6484	6867	-0.476	7634	0.7087	7528	0.4514	3474	0.3345	3570
CKS1B	0.6371	1295	0.184	2079	-0.3444	5927	0.5319	5620	0.5169	2756	0.3284	3503	-0.4548	7241	0.6168	6543	-0.275	5455	0.5002	5287	0.3982	3684	0.3954	4206	-0.3243	5659	0.511	5390	0.88	63	0.0118	116	0.4371	3625	0.3881	4132
SST	0.6371	1296	0.0861	960	-0.5498	7872	0.7629	8119	0.6859	995	0.0577	685	0.5389	2349	0.1823	1997	0.8246	175	0.0043	66	0.3186	4530	0.4114	4394	0.6404	1312	0.0854	1010	-0.5982	8903	0.8745	9282	-0.5769	8426	0.8242	8743
LCMT2	0.6369	1297	0.0861	962	0.669	1630	0.1304	1411	0.5034	2880	0.2402	2560	0.5403	2332	0.1812	1984	0.5145	2723	0.2171	2389	0.6495	1077	0.0703	789	0.2961	4801	0.4466	4700	-0.6985	9830	0.9522	10140	0.7221	716	0.0416	481
FRMPD2	0.6368	1298	0.1845	2086	-0.6552	8926	0.7854	8352	-0.6353	9268	0.8015	8454	0.6036	1643	0.2315	2478	0.638	1470	0.1957	2175	0.4405	3160	0.3559	3823	0.5871	1793	0.2402	2567	-0.775	10329	0.9342	9915	-0.416	6676	0.5806	6205
HSD3B1	0.6367	1299	0.1845	2085	-0.8734	10477	0.9682	10300	-0.4023	6690	0.5864	6196	0.8482	91	0.0208	245	0.7332	593	0.0961	1122	0.5948	1587	0.2228	2385	0.8857	38	0.0081	113	-0.466	7518	0.6433	6846	0.7107	801	0.1254	1330
LIPJ	0.6363	1300	0.0868	967	0.4406	3925	0.3483	3758	-0.384	6474	0.6352	6687	0.4677	3118	0.2644	2812	-0.6271	9087	0.899	9489	0.6625	967	0.0612	696	0.3361	4440	0.4119	4291	0.515	3015	0.2484	2699	0.3972	4050	0.3626	3847
DCP2	0.6361	1301	0.1242	1382	0.5482	2892	0.2758	2965	0.412	3924	0.3812	4059	0.5198	2581	0.2486	2671	-0.3855	6400	0.6005	6360	-0.6399	9207	0.8651	9144	0.4611	3046	0.298	3129	-0.4143	6974	0.6476	6878	0.8464	108	0.0109	119
HSPB2	0.636	1302	0.1855	2096	-0.8119	10196	0.9293	9885	0.3994	4093	0.4252	4507	0.6899	819	0.1347	1465	0.4837	3032	0.3423	3687	0.8392	97	0.0226	266	0.4017	3749	0.4033	4201	-0.7367	10105	0.9041	9588	0.9317	13	0.0029	32
PRMT7	0.6359	1303	0.0871	970	-0.3421	5909	0.5672	6029	-0.4758	7526	0.7464	7868	0.3481	4490	0.4088	4338	0.4477	3442	0.295	3172	0.2306	5001	0.4624	4931	0.6981	827	0.045	546	0.3818	4483	0.4075	4340	-0.735	9968	0.9581	10191
ICOSLG	0.6358	1304	0.0873	972	0.6523	1788	0.1445	1553	0.4376	3625	0.3184	3381	0.4179	3707	0.3248	3457	0.5425	2420	0.1847	2064	0.3672	4051	0.3567	3835	0.573	1944	0.1427	1620	-0.3365	6179	0.593	6322	0.5268	2662	0.2185	2348
BMP6	0.6358	1305	0.0873	973	0.357	4686	0.4287	4574	-0.6111	8967	0.8862	9363	0.7659	346	0.0158	183	0.4063	3902	0.3458	3725	0.6258	1326	0.0887	998	0.5734	1941	0.1425	1615	-0.3553	6351	0.6103	6523	0.6813	1048	0.0705	769
LIN37	0.6358	1306	0.0873	971	0.4926	3434	0.2992	3212	0.7946	257	0.01	130	-0.4319	6974	0.6846	7276	0.6005	1835	0.1293	1495	0.6344	1227	0.0821	922	0.2759	4943	0.4616	4849	0.5463	2641	0.2097	2301	0.7344	623	0.0348	409
GPR82	0.6355	1307	0.0874	975	0.6118	2204	0.1817	1957	0.7514	483	0.0218	267	0.6048	1629	0.1206	1280	0.4802	3077	0.2559	2757	0.3275	4435	0.4027	4282	-0.2417	5185	0.4937	5186	0.3263	5059	0.4658	4976	-0.8159	10433	0.991	10551
LYN	0.6351	1308	0.0875	976	0.3679	4597	0.4195	4474	-0.7537	10217	0.9781	10402	-0.3418	5943	0.5741	6071	-0.5769	8539	0.8462	8903	0.4876	2617	0.2141	2299	0.739	521	0.0239	296	-0.673	9624	0.9381	9963	0.7152	777	0.0451	522
POLDIP2	0.6348	1309	0.0877	978	0.4459	3869	0.344	3707	-0.8237	10509	0.9963	10609	0.2798	5044	0.4667	4953	0.8858	47	0.0006	16	0.5712	1820	0.1333	1472	0.4064	3685	0.3278	3422	0.3948	4340	0.3932	4191	0.7725	412	0.0192	247
BCKDHA	0.6348	1310	0.0877	979	-0.7044	9399	0.9075	9641	-0.6986	9859	0.9517	10134	0.5217	2555	0.2013	2194	0.7365	562	0.0276	324	0.6304	1271	0.0851	955	0.6819	981	0.055	666	-0.5025	7904	0.7809	8246	-0.4293	6838	0.6584	7049
KCND1	0.6346	1311	0.1256	1395	-0.6336	8691	0.8129	8626	-0.4266	6958	0.6528	6878	-0.3937	6523	0.6088	6469	0.4952	2902	0.2813	3014	0.6853	774	0.0763	860	0.4653	3011	0.2948	3101	0.5202	2958	0.2832	3062	0.7216	720	0.0715	777
FARP1	0.6346	1312	0.088	982	0.7666	750	0.0511	549	0.5667	2236	0.1671	1849	0.6812	906	0.0574	607	-0.3944	6520	0.6348	6719	0.433	3243	0.2757	2947	-0.4478	7055	0.6958	7365	0.495	3236	0.2723	2954	-0.3066	5625	0.534	5698
APOA5	0.6345	1313	0.0882	984	-0.3	5609	0.5372	5676	-0.73	10072	0.9691	10296	0.5245	2523	0.1991	2169	0.5414	2432	0.1859	2077	0.6658	943	0.0598	672	0.3728	4085	0.368	3859	-0.4061	6890	0.6705	7129	-0.566	8304	0.8134	8627
HCRTR1	0.6345	1314	0.1868	2114	0.5618	2744	0.3093	3314	-0.6467	9379	0.8112	8560	0.5869	1854	0.2485	2670	0.5534	2308	0.2845	3052	0.805	169	0.0381	444	0.7109	751	0.1111	1258	-0.4275	7100	0.6092	6509	-0.3767	6250	0.5519	5888
SOCS1	0.6341	1315	0.272	2912	0.4979	3380	0.4018	4293	0.8418	132	0.0699	818	-0.6951	9811	0.7812	8248	0.8445	113	0.0671	793	-0.6842	9666	0.7646	8014	0.5556	2079	0.3423	3568	0.7565	512	0.1616	1774	0.6862	998	0.2356	2519
UBAP2L	0.6341	1316	0.0884	990	0.5538	2835	0.2396	2584	0.2772	5169	0.4834	5119	0.5639	2086	0.1587	1735	-0.2936	5569	0.5328	5654	0.808	160	0.0046	52	0.5423	2207	0.1702	1887	0.4471	3763	0.33	3548	0.6623	1220	0.0867	918
DCLK1	0.6341	1317	0.126	1400	0.3772	4514	0.4286	4572	0.2575	5264	0.5062	5345	0.532	2422	0.237	2540	-0.4268	6878	0.6423	6803	0.7877	218	0.0226	267	-0.5408	8138	0.7586	8022	-0.2952	5858	0.548	5825	0.6332	1509	0.1507	1606
CLNS1A	0.6341	1318	0.0884	989	0.6928	1396	0.1081	1159	0.3841	4278	0.3836	4095	0.5184	2593	0.2056	2234	-0.623	9050	0.8957	9445	-0.516	7716	0.7713	8084	0.8504	90	0.0014	36	-0.5975	8894	0.8737	9272	0.8056	254	0.0105	111
TESK2	0.6339	1319	0.0885	992	-0.723	9572	0.9211	9806	0.4599	3359	0.2916	3070	0.6382	1268	0.0919	964	-0.642	9256	0.9125	9658	0.4515	3022	0.2539	2707	-0.4062	6540	0.6411	6781	0.6317	1649	0.1191	1307	0.7475	541	0.0284	342
GPR97	0.6338	1320	0.1261	1401	0.6587	1721	0.1688	1822	-0.3849	6486	0.6114	6455	0.4693	3098	0.2995	3178	0.4716	3167	0.3036	3276	0.7003	670	0.0653	734	0.2547	5027	0.4842	5095	-0.5004	7883	0.7328	7766	-0.3082	5635	0.5253	5598
ZNF430	0.6338	1321	0.1876	2119	0.6984	1346	0.1746	1891	0.8536	105	0.0194	243	-0.4747	7459	0.6337	6741	-0.7832	10361	0.9413	10000	0.4206	3420	0.3738	4017	0.3466	4347	0.4464	4699	0.382	4480	0.4492	4794	0.3963	4067	0.4203	4438
TBX19	0.6337	1322	0.0885	991	0.3759	4528	0.4125	4395	0.6036	1841	0.1308	1493	0.407	3834	0.3387	3590	-0.2991	5594	0.5366	5688	0.7963	191	0.0063	75	-0.2715	5308	0.5059	5326	-0.5414	8310	0.8185	8671	0.4478	3514	0.3048	3243
CDKN2D	0.6336	1323	0.0886	993	0.5669	2685	0.2262	2412	0.3946	4153	0.3705	3945	0.6889	826	0.0516	538	0.5454	2388	0.1807	2025	0.5188	2323	0.1788	1968	0.2933	4823	0.4487	4720	0.274	5411	0.5037	5374	-0.3504	5991	0.5704	6090
TRAPPC3	0.6335	1324	0.0887	994	0.2885	5147	0.4778	5086	0.5923	1957	0.1431	1615	0.7297	534	0.0293	341	-0.3512	6044	0.5842	6172	0.8168	145	0.0036	43	0.5226	2411	0.1923	2092	-0.4899	7784	0.7675	8110	0.3962	4069	0.3631	3863
B4GALT4	0.6335	1325	0.1265	1404	-0.6889	9252	0.8635	9151	-0.4326	7036	0.6589	6944	0.3119	4797	0.462	4884	-0.414	6726	0.6297	6658	0.4876	2618	0.2558	2728	0.6566	1177	0.1084	1226	0.4413	3830	0.3655	3937	0.6185	1649	0.1659	1757
POLRMT	0.6335	1326	0.1265	1403	0.7753	687	0.0698	738	0.3801	4329	0.4167	4420	0.5959	1741	0.1729	1886	-0.7046	9859	0.9259	9825	0.7434	432	0.0418	474	0.6963	837	0.0745	888	0.4437	3797	0.3623	3904	-0.495	7565	0.696	7442
UBR1	0.6334	1327	0.0889	997	-0.379	6212	0.5969	6348	0.251	5282	0.4972	5249	0.5395	2343	0.1816	1987	0.7267	651	0.0332	380	0.6106	1464	0.1006	1132	-0.3019	5484	0.5262	5543	0.64	1550	0.1101	1202	0.2145	5240	0.4892	5202
HLA-DOB	0.6334	1328	0.1267	1405	0.7674	744	0.0764	804	-0.2923	5665	0.535	5647	0.7465	445	0.0455	483	-0.7359	10096	0.9462	10062	0.6069	1493	0.1423	1586	0.7135	731	0.0633	776	0.3226	5089	0.4845	5171	0.6043	1812	0.1805	1946
ZSWIM2	0.6332	1329	0.1271	1410	0.3992	4308	0.4106	4374	0.668	1190	0.1075	1242	0.4216	3654	0.3527	3747	-0.7894	10391	0.9773	10406	0.4527	3013	0.2938	3161	0.5261	2379	0.2333	2502	0.7508	547	0.0523	589	0.5898	1965	0.1957	2110
TMED8	0.6331	1330	0.0892	998	0.6337	1984	0.1606	1737	-0.394	6589	0.6459	6808	0.8173	170	0.0049	56	0.4847	3018	0.2495	2698	0.7758	256	0.0105	122	0.4633	3025	0.2589	2739	0.2331	5532	0.5188	5528	0.2913	4985	0.4591	4879
CHL1	0.6331	1331	0.1274	1411	-0.5372	7750	0.7191	7657	0.5984	1886	0.1787	1963	-0.5226	7997	0.7447	7888	-0.3378	5920	0.554	5873	0.6791	821	0.0809	907	0.5926	1752	0.1684	1858	-0.3679	6480	0.6066	6477	-0.4388	6924	0.6419	6862
OR10J1	0.6329	1332	0.1274	1413	0.718	1144	0.1137	1216	0.7976	248	0.0223	276	0.6489	1174	0.1197	1265	0.8023	247	0.0208	266	0.7544	365	0.0358	426	0.4292	3395	0.3353	3497	-0.8009	10440	0.981	10454	0.4542	3440	0.3307	3540
DIO2	0.6327	1333	0.1275	1414	0.2882	5149	0.49	5203	0.4277	3751	0.3614	3849	0.642	1230	0.1263	1349	0.2832	5037	0.4847	5138	0.2448	4969	0.474	5045	0.8583	74	0.0062	86	-0.8568	10591	0.9943	10588	0.365	4392	0.4223	4472
CD47	0.6326	1334	0.0895	1006	0.681	1519	0.1191	1288	0.4771	3165	0.2705	2875	0.3141	4781	0.4419	4672	0.3485	4519	0.4128	4369	0.6233	1351	0.0908	1018	0.4586	3067	0.2644	2790	0.5269	2881	0.2333	2543	0.2599	5145	0.477	5090
GATA3	0.6324	1335	0.1895	2148	-0.7804	10004	0.9025	9586	0.7737	356	0.0639	751	0.7384	488	0.0891	937	-0.516	7876	0.6705	7080	-0.6172	8937	0.7707	8076	-0.3269	5676	0.5122	5408	0.7325	684	0.1083	1184	-0.8506	10532	0.9718	10337
RNF145	0.6322	1336	0.09	1007	0.5616	2746	0.2317	2479	-0.4792	7564	0.7504	7902	0.4733	3056	0.2579	2740	0.286	5024	0.4671	4948	0.7438	430	0.0189	223	0.5361	2264	0.1783	1958	0.4954	3229	0.272	2946	0.4214	3799	0.3324	3551
EPHB3	0.6319	1337	0.1286	1421	0.6271	2056	0.1994	2121	0.671	1156	0.1057	1226	0.427	3591	0.3461	3679	-0.5237	7972	0.7438	7847	0.7453	421	0.0411	467	0.269	4970	0.4801	5055	0.346	4872	0.4636	4951	-0.499	7600	0.6989	7472
GRPEL2	0.6318	1338	0.0902	1012	0.6615	1698	0.1356	1463	-0.4183	6870	0.6757	7121	0.5349	2390	0.1871	2045	-0.3345	5887	0.566	5989	0.2877	4769	0.4351	4640	0.6853	948	0.052	633	0.4697	3507	0.3039	3254	-0.5672	8317	0.814	8640
ADRB2	0.6318	1339	0.1288	1422	0.7441	925	0.0923	968	-0.3281	5951	0.5588	5908	-0.627	9168	0.8588	9094	-0.5202	7926	0.7399	7810	0.4256	3343	0.3246	3480	0.3969	3810	0.3719	3901	0.3876	4424	0.4269	4561	-0.2947	5544	0.5188	5537
USP9X	0.6316	1340	0.129	1425	0.3977	4322	0.4118	4389	-0.4935	7716	0.7219	7600	0.6249	1408	0.1408	1537	0.7003	886	0.077	915	-0.469	7186	0.6673	7046	0.762	396	0.0358	447	-0.8397	10564	0.992	10567	-0.5505	8127	0.7534	8031
TFF1	0.6315	1341	0.2748	2931	0.9511	37	0.014	175	0.8934	45	0.0332	406	0.864	64	0.0519	542	-0.8847	10632	0.9629	10241	-0.5925	8654	0.6603	6975	0.4721	2940	0.4019	4190	0.6698	1228	0.2595	2825	0.918	17	0.0211	259
PDCL	0.6315	1342	0.0905	1014	-0.5603	7963	0.7738	8232	0.4958	2968	0.2478	2644	0.2238	5222	0.4909	5192	0.7516	473	0.0201	263	0.48	2698	0.223	2393	0.585	1815	0.1323	1492	0.438	3877	0.3413	3679	0.6018	1846	0.1427	1520
SMS	0.6315	1343	0.0905	1013	0.6454	1858	0.1507	1616	0.4293	3730	0.3268	3484	0.5316	2426	0.1908	2080	0.331	4692	0.4315	4571	-0.4011	6355	0.6182	6550	0.6019	1665	0.1177	1327	0.4271	4004	0.3548	3840	0.6966	913	0.0567	639
ATF4	0.6314	1344	0.1291	1427	-0.4821	7229	0.6702	7138	0.8488	114	0.0079	110	0.5986	1708	0.1704	1851	-0.4484	7140	0.6639	7013	-0.4548	7003	0.6522	6895	0.6405	1311	0.1232	1385	-0.7377	10114	0.9474	10077	0.5346	2583	0.2539	2694
PDYN	0.6314	1345	0.0906	1016	0.7825	635	0.0418	464	0.5404	2504	0.1966	2139	-0.3906	6487	0.6304	6708	0.8144	205	0.006	85	0.3376	4348	0.3904	4173	-0.4907	7540	0.7491	7915	-0.5861	8753	0.862	9139	0.678	1083	0.0726	791
CDKAL1	0.6313	1346	0.0906	1017	0.4736	3604	0.317	3397	0.3989	4102	0.3671	3903	0.3197	4740	0.4368	4627	0.6381	1468	0.0957	1117	0.6823	801	0.0496	558	0.5163	2471	0.1988	2153	-0.3839	6653	0.6441	6851	0.5567	2352	0.1862	2021
UGT1A5	0.6312	1347	0.0907	1018	-0.7652	9912	0.9484	10102	0.7348	589	0.0292	350	-0.4753	7469	0.7362	7814	-0.4141	6728	0.6608	6984	0.549	2040	0.1512	1671	0.455	3100	0.269	2825	-0.5079	7963	0.7873	8323	0.6411	1421	0.1059	1108
SQLE	0.6311	1348	0.0909	1021	-0.6161	8513	0.8325	8812	-0.6191	9058	0.8931	9440	-0.4456	7131	0.6994	7430	-0.3424	5963	0.575	6063	0.6243	1343	0.0902	1006	0.4932	2727	0.2248	2413	0.4308	3961	0.3504	3792	0.5386	2548	0.2044	2192
CRYGD	0.631	1349	0.1909	2166	0.6439	1877	0.2292	2454	0.6217	1656	0.2211	2384	0.4152	3737	0.4002	4257	0.6457	1400	0.1857	2074	-0.3398	5671	0.508	5405	0.8929	30	0.0071	98	-0.6905	9772	0.8567	9082	-0.559	8218	0.7005	7490
MPPE1	0.6309	1350	0.0913	1028	-0.4735	7150	0.6913	7343	0.3445	4683	0.4282	4540	-0.7101	9928	0.9606	10217	0.5379	2472	0.1898	2118	0.3021	4668	0.4249	4523	-0.2572	5241	0.4987	5250	-0.4629	7472	0.739	7809	0.6355	1481	0.1109	1162
GLRA3	0.6309	1351	0.1294	1432	0.4561	3776	0.3592	3838	-0.7901	10403	0.9775	10389	-0.5887	8763	0.8166	8632	0.4096	3873	0.3708	3966	0.7962	192	0.0192	227	0.6243	1455	0.1372	1549	-0.6845	9726	0.9109	9659	-0.3164	5684	0.5305	5655
OR10K2	0.6308	1352	0.1912	2169	0.7093	1234	0.1631	1756	-0.4524	7263	0.6288	6637	0.5733	1988	0.2624	2790	-0.432	6945	0.5976	6326	0.3328	4383	0.4444	4734	0.4302	3383	0.3767	3947	0.701	938	0.1396	1521	-0.4892	7508	0.6413	6858
IDH1	0.6307	1353	0.0913	1029	0.3277	4893	0.4526	4827	0.4205	3822	0.3385	3601	0.6397	1254	0.0904	952	0.379	4188	0.3769	4015	0.4491	3046	0.2565	2735	0.4035	3721	0.3318	3460	-0.2841	5790	0.5521	5887	0.6509	1338	0.0968	1013
RIPK4	0.6307	1354	0.1296	1436	0.5531	2844	0.2709	2909	0.7024	840	0.0765	902	0.3628	4333	0.4189	4451	-0.5824	8605	0.8083	8500	-0.3786	6083	0.5709	6040	0.3468	4344	0.4244	4449	-0.5827	8721	0.8161	8635	0.7177	753	0.0745	812
PARP14	0.6306	1355	0.0915	1032	0.3897	4392	0.3999	4264	0.763	413	0.0173	216	-0.5336	8110	0.8028	8477	0.7791	336	0.013	179	0.3177	4538	0.412	4410	0.2659	4985	0.4671	4900	0.6207	1758	0.1301	1416	0.6226	1610	0.1228	1305
APBB1IP	0.6306	1356	0.0915	1033	-0.2947	5578	0.5336	5643	-0.6932	9817	0.9495	10108	0.5334	2403	0.189	2061	0.4526	3384	0.2884	3099	0.5474	2059	0.1525	1691	0.2631	4996	0.4682	4922	-0.3661	6464	0.6225	6648	0.7491	532	0.0276	333
UCP1	0.6304	1357	0.0916	1036	0.5539	2834	0.2396	2583	0.6113	1763	0.1237	1423	0.4165	3721	0.3261	3470	0.4595	3295	0.2803	3000	0.6709	906	0.0553	636	-0.4819	7445	0.7365	7800	-0.5615	8516	0.8389	8903	0.5522	2406	0.1902	2062
HDAC1	0.6304	1358	0.0916	1034	0.7413	941	0.0696	731	-0.4215	6907	0.6796	7158	0.4794	2986	0.2499	2676	0.4299	3673	0.3167	3433	0.6	1548	0.1086	1205	0.5447	2180	0.1685	1861	-0.5446	8346	0.8215	8710	-0.3228	5733	0.5466	5816
KHDRBS1	0.6304	1359	0.0916	1037	0.7146	1184	0.0916	958	0.3449	4681	0.4281	4539	0.5213	2564	0.202	2202	0.8657	74	0.0011	26	0.3724	3999	0.3513	3778	0.5406	2217	0.1717	1898	0.4006	4283	0.3862	4136	-0.5749	8402	0.8214	8721
CALM2	0.6303	1360	0.0916	1035	0.6306	2016	0.1636	1764	-0.5759	8607	0.8497	8959	0.5418	2316	0.1796	1967	0.4696	3188	0.2684	2888	0.3689	4029	0.355	3811	0.3746	4065	0.3656	3836	0.5049	3121	0.2595	2824	0.4743	3228	0.2742	2905
ENTPD1	0.6302	1361	0.1302	1445	-0.6337	8692	0.8131	8629	-0.5137	7955	0.7438	7839	0.8084	195	0.0174	210	-0.4415	7059	0.6572	6950	0.8255	123	0.0101	117	0.6139	1553	0.1469	1671	0.358	4769	0.4545	4858	0.7993	280	0.0262	316
SLC22A16	0.6302	1362	0.0917	1039	0.7587	799	0.0559	600	-0.5197	8013	0.7956	8377	0.7091	680	0.0399	430	-0.7468	10165	0.9767	10400	0.3928	3758	0.3266	3505	0.4608	3050	0.2627	2772	0.442	3816	0.3369	3626	-0.6163	8816	0.8649	9166
CTNNB1	0.63	1363	0.1304	1448	-0.3508	5989	0.5618	5973	-0.7785	10349	0.9725	10334	0.6806	915	0.0899	948	0.7409	537	0.0507	599	0.5121	2383	0.2335	2494	0.7074	765	0.0678	824	-0.6284	9195	0.8605	9126	0.568	2226	0.2173	2332
RNASE9	0.6297	1364	0.0921	1043	-0.5141	7539	0.73	7777	0.6638	1235	0.0764	901	-0.1992	5241	0.495	5224	0.5259	2598	0.2042	2267	-0.4261	6658	0.6521	6889	0.5445	2182	0.1686	1863	-0.4418	7253	0.7129	7570	0.3652	4388	0.3964	4217
BSND	0.6297	1365	0.0921	1041	-0.7215	9554	0.9202	9795	0.4123	3916	0.3505	3723	-0.3302	5837	0.5618	5941	0.6241	1614	0.1076	1268	0.6307	1270	0.085	949	0.5146	2486	0.2006	2164	-0.4399	7229	0.7109	7544	0.5297	2634	0.2151	2305
SBF2	0.6297	1366	0.0921	1044	0.789	600	0.0385	433	-0.4112	6788	0.6667	7022	0.7765	296	0.0128	148	0.4672	3206	0.2712	2911	0.3318	4393	0.3984	4233	0.3998	3770	0.3364	3506	0.4758	3454	0.2952	3191	0.399	4031	0.3608	3825
CLGN	0.6297	1367	0.0922	1046	-0.6989	9350	0.9038	9596	0.6441	1431	0.0926	1093	-0.4649	7344	0.7241	7680	-0.3107	5681	0.5462	5786	0.5623	1898	0.1401	1562	0.4223	3477	0.3088	3226	-0.4027	6845	0.6663	7082	0.3806	4244	0.3817	4051
SCML1	0.6294	1368	0.0924	1049	0.8398	319	0.0193	223	0.7001	862	0.0476	571	0.3598	4360	0.394	4190	0.567	2179	0.1601	1800	0.6541	1044	0.0666	747	0.7045	782	0.0411	505	-0.3468	6277	0.6008	6424	0.4308	3693	0.3238	3462
CXCL5	0.6292	1369	0.1925	2183	-0.8389	10356	0.9486	10104	0.6353	1519	0.204	2222	-0.6103	9000	0.7734	8163	0.8551	91	0.0179	242	0.7544	368	0.0676	757	-0.4044	6518	0.5661	5959	-0.6506	9415	0.8171	8649	0.6943	938	0.1429	1523
PHF21A	0.6292	1370	0.1309	1451	-0.6367	8736	0.8157	8659	0.6019	1858	0.1745	1928	0.5024	2752	0.266	2821	-0.517	7891	0.7365	7770	0.8061	167	0.0159	188	0.6457	1270	0.1182	1334	0.5593	2487	0.2404	2613	0.3129	4847	0.4603	4894
ZNF354A	0.6289	1371	0.1931	2187	-0.7343	9648	0.8657	9171	-0.7179	9993	0.885	9347	0.3559	4410	0.4465	4706	-0.3976	6559	0.5716	6031	0.6889	753	0.1253	1372	0.6379	1338	0.1864	2034	0.53	2850	0.3283	3527	0.5738	2153	0.2747	2910
NRG2	0.6288	1372	0.0928	1051	-0.3979	6397	0.6161	6557	0.4257	3769	0.331	3526	0.88	43	0.0007	11	0.6263	1583	0.1061	1244	-0.5671	8352	0.828	8724	-0.2633	5260	0.5012	5274	0.3931	4363	0.3953	4214	-0.5854	8515	0.8324	8842
KCNH8	0.6287	1373	0.0928	1050	-0.386	6285	0.6044	6432	0.5897	1982	0.1453	1633	-0.5264	8031	0.7961	8408	0.3784	4201	0.3778	4030	0.759	349	0.0143	166	0.4049	3701	0.3295	3441	0.5109	3056	0.2525	2747	0.4455	3535	0.308	3275
USP12	0.6287	1374	0.0928	1052	0.3566	4692	0.4291	4580	0.3939	4164	0.3719	3957	0.4589	3219	0.275	2903	0.5623	2221	0.1648	1847	0.6205	1378	0.0932	1046	0.2653	4987	0.4673	4906	0.7459	578	0.0301	332	0.6605	1247	0.0876	936
OR7A5	0.6287	1375	0.1312	1453	0.4636	3702	0.3505	3774	0.4311	3710	0.3585	3806	0.4636	3171	0.3055	3245	0.699	898	0.0774	920	0.5692	1837	0.1787	1965	0.4379	3297	0.3265	3407	0.6085	1896	0.1839	2011	0.5515	2414	0.2361	2527
LPGAT1	0.6286	1376	0.1313	1456	0.5493	2880	0.2746	2953	-0.4827	7595	0.7109	7492	0.4698	3092	0.2994	3175	-0.3948	6524	0.6099	6464	-0.56	8267	0.7748	8123	0.3773	4035	0.3933	4114	0.6032	1955	0.1902	2086	0.368	4354	0.4202	4435
CELA2A	0.6284	1377	0.1939	2197	0.5	3360	0.3535	3795	0.3899	4215	0.4334	4593	-0.3766	6307	0.5522	5850	0.5659	2191	0.273	2928	0.4629	2902	0.3382	3651	0.553	2099	0.2717	2854	-0.4031	6852	0.5904	6298	0.2849	5034	0.4834	5145
STAT4	0.6284	1378	0.194	2199	-0.4528	6928	0.6057	6449	0.2488	5292	0.4999	5283	0.546	2277	0.2853	3019	0.5838	2004	0.2577	2779	0.4234	3374	0.3715	3984	0.3859	3939	0.418	4371	-0.6728	9623	0.8392	8908	0.6084	1759	0.2401	2562
FAM167A	0.6284	1379	0.0932	1053	0.4941	3417	0.2967	3189	0.4794	3137	0.2675	2846	0.3372	4588	0.4193	4460	0.3697	4298	0.3881	4125	0.3813	3901	0.3396	3664	-0.3428	5820	0.5647	5943	-0.6234	9159	0.8979	9533	-0.5641	8281	0.8114	8600
SIRT2	0.6282	1380	0.0435	497	-0.511	7515	0.7793	8284	0.715	739	0.0115	149	0.5972	1725	0.0687	731	0.4885	2981	0.1733	1940	0.7269	528	0.0067	78	-0.3444	5842	0.6122	6455	0.2771	5396	0.4943	5298	0.4999	2955	0.1754	1870
DCK	0.6281	1381	0.1316	1464	-0.547	7850	0.7292	7767	-0.4293	6996	0.6557	6923	0.4095	3805	0.3654	3894	-0.426	6867	0.6415	6794	0.7856	225	0.0232	273	0.6768	1023	0.0906	1058	0.6019	1968	0.1917	2096	0.4692	3288	0.3151	3365
ITGA11	0.628	1382	0.0934	1054	-0.4962	7352	0.7136	7590	-0.517	7987	0.7926	8345	0.7562	385	0.0177	213	0.6793	1059	0.0621	741	0.7992	187	0.0061	72	0.2662	4981	0.4671	4901	-0.4271	7098	0.6952	7380	-0.5156	7750	0.7574	8074
BCL7C	0.6276	1383	0.0935	1057	0.3723	4558	0.4156	4429	-0.541	8239	0.8165	8616	0.5372	2369	0.1845	2020	0.4395	3553	0.3049	3288	0.758	351	0.0144	171	0.3639	4172	0.3776	3962	-0.5036	7918	0.7823	8270	-0.5462	8080	0.7898	8420
EPHA5	0.6275	1384	0.1322	1469	-0.7144	9492	0.8885	9414	0.2838	5135	0.4957	5232	0.7846	271	0.0261	303	0.2618	5151	0.4942	5224	0.3734	3986	0.3819	4084	-0.333	5737	0.5397	5671	0.753	533	0.0508	572	-0.3701	6176	0.5754	6157
TLR3	0.6274	1385	0.2792	2987	-0.6008	8366	0.665	7084	0.937	15	0.0118	154	-0.3487	6006	0.5117	5414	0.822	184	0.085	1009	-0.7187	9943	0.8065	8511	-0.4225	6754	0.5363	5639	0.4563	3666	0.4364	4658	0.5141	2798	0.393	4180
ADAMTS9	0.6273	1386	0.0937	1058	0.4897	3464	0.3024	3247	0.636	1509	0.1006	1167	-0.2653	5388	0.5108	5403	-0.4959	7656	0.7612	7998	0.5367	2160	0.1623	1797	-0.5839	8663	0.8543	9044	-0.4027	6848	0.6664	7086	0.4384	3602	0.3149	3363
TPH2	0.627	1387	0.0938	1059	0.5264	3117	0.2679	2877	-0.5435	8273	0.8193	8645	0.573	1996	0.1508	1648	-0.3154	5728	0.5508	5837	0.4489	3047	0.2566	2736	0.7334	560	0.0263	328	0.6671	1259	0.085	943	0.7219	717	0.0417	482
ADAMTS13	0.6269	1388	0.0939	1060	-0.9261	10603	0.9978	10639	-0.4025	6692	0.6559	6924	0.4542	3277	0.2794	2959	-0.3953	6531	0.6356	6728	0.5662	1869	0.1368	1520	-0.334	5742	0.5565	5858	0.4148	4127	0.3695	3982	-0.7002	9686	0.9368	9970
ESD	0.6264	1389	0.1331	1479	-0.4659	7061	0.6567	6998	-0.5434	8269	0.7741	8140	0.4785	3001	0.2909	3089	0.6593	1250	0.1133	1330	0.7577	354	0.034	414	0.5139	2493	0.2443	2601	0.2488	5496	0.5222	5568	0.6404	1430	0.1435	1531
PRKCG	0.6263	1390	0.1332	1480	-0.6683	9058	0.848	8961	0.5536	2371	0.2275	2439	0.2542	5151	0.4943	5218	0.3462	4545	0.4379	4643	0.8441	90	0.0073	83	0.296	4802	0.4655	4885	-0.7968	10428	0.9796	10439	-0.6483	9167	0.857	9075
RDBP	0.6263	1391	0.1333	1481	0.5722	2615	0.251	2701	0.5036	2878	0.2825	2979	-0.3633	6168	0.5793	6133	0.6871	1000	0.0878	1034	0.6923	730	0.0711	805	-0.3535	5925	0.5596	5888	-0.6346	9253	0.8656	9188	0.5857	2009	0.1994	2148
COPS6	0.6261	1392	0.1334	1483	-0.4028	6459	0.6043	6430	0.4389	3609	0.3504	3722	0.776	297	0.0293	338	0.6939	945	0.0821	983	-0.9279	10654	0.9996	10662	0.6491	1236	0.1147	1301	0.8738	74	0.0055	51	-0.445	6999	0.6465	6923
CD46	0.6258	1393	0.0948	1063	0.4705	3640	0.3197	3442	0.6108	1770	0.124	1428	0.6487	1177	0.0817	881	0.5063	2805	0.2281	2485	0.5126	2379	0.1871	2035	0.8421	108	0.0019	42	-0.2951	5856	0.5597	5969	0.6591	1259	0.0888	949
ATP8B3	0.6258	1394	0.0948	1062	0.395	4344	0.3948	4223	-0.3453	6093	0.5894	6227	0.6012	1672	0.1239	1320	0.5796	2051	0.1493	1696	0.5151	2354	0.1846	2017	0.7002	815	0.0442	537	-0.4813	7697	0.7587	8028	0.3435	4570	0.4184	4421
CAPN13	0.6257	1395	0.1336	1488	0.6163	2161	0.2102	2216	-0.4198	6892	0.6466	6818	-0.5669	8508	0.7932	8381	-0.3512	6043	0.5681	6007	-0.3224	5520	0.5182	5512	0.553	2098	0.2077	2236	0.5821	2195	0.2133	2324	0.4897	3064	0.2972	3155
ZNF805	0.6256	1396	0.1977	2241	0.8567	251	0.0389	437	-0.4789	7561	0.6521	6872	0.6804	918	0.1439	1580	-0.5355	8088	0.6888	7288	-0.7876	10374	0.9466	10036	-0.5233	7934	0.6688	7092	-0.5084	7966	0.6789	7206	0.6571	1279	0.1851	2006
NRIP3	0.6255	1397	0.095	1064	-0.557	7939	0.7705	8198	0.5369	2543	0.1998	2180	0.2632	5127	0.4764	5044	-0.407	6656	0.651	6891	0.4312	3273	0.2786	2979	0.6781	1013	0.0581	703	0.3904	4391	0.3987	4243	0.6145	1685	0.1301	1376
SHBG	0.6255	1398	0.1338	1491	0.2754	5202	0.4955	5258	0.591	1972	0.1878	2059	0.4893	2877	0.2819	2982	0.601	1831	0.1724	1929	-0.5685	8369	0.7843	8250	0.3805	4000	0.39	4084	-0.4746	7622	0.7079	7517	0.4382	3603	0.348	3684
MED25	0.6253	1399	0.1983	2246	-0.5057	7458	0.6423	6843	-0.7391	10123	0.9058	9615	0.5754	1960	0.2604	2766	0.6943	938	0.1342	1552	0.5508	2021	0.2654	2830	0.6506	1226	0.1717	1897	-0.3395	6206	0.543	5779	-0.6151	8808	0.7604	8106
ECEL1	0.6251	1400	0.134	1493	0.7958	554	0.0552	586	0.711	776	0.0715	845	0.5609	2116	0.2068	2241	-0.6288	9110	0.8578	9053	0.4212	3409	0.3295	3545	0.3884	3907	0.3812	3999	-0.4354	7186	0.668	7106	-0.5983	8655	0.8034	8542
GLE1	0.6251	1401	0.0954	1065	-0.4595	7000	0.6782	7196	-0.4178	6863	0.6755	7115	0.8085	194	0.0068	79	-0.2191	5291	0.4997	5282	0.4298	3288	0.2802	2998	0.6182	1516	0.105	1200	-0.5204	8085	0.7989	8442	0.3331	4659	0.4278	4522
WFDC8	0.6251	1402	0.0955	1066	0.2656	5238	0.4903	5208	0.2463	5302	0.4989	5270	0.65	1158	0.0807	867	0.5681	2170	0.1593	1791	-0.3944	6275	0.6088	6468	0.6371	1348	0.0885	1040	0.4254	4021	0.3572	3861	0.6246	1590	0.1205	1274
PAX4	0.6248	1403	0.0957	1067	0.496	3397	0.2949	3168	-0.4669	7424	0.7363	7768	0.7891	253	0.0096	124	-0.5207	7932	0.7871	8281	0.2682	4870	0.4481	4768	0.5443	2185	0.1687	1864	0.7029	918	0.0552	614	0.5472	2464	0.1961	2114
SLC25A5	0.6247	1404	0.1345	1500	-0.7795	10000	0.9375	9965	0.6479	1392	0.1264	1455	0.3	4899	0.471	4992	-0.564	8390	0.7878	8286	0.4965	2525	0.2464	2619	-0.5113	7782	0.7258	7684	0.5255	2900	0.2773	3007	0.8334	141	0.0143	174
CBL	0.6245	1405	0.1347	1505	0.8371	332	0.0329	362	0.3369	4763	0.4566	4842	0.3959	3959	0.3838	4083	-0.6638	9480	0.8915	9403	-0.4077	6449	0.5997	6372	0.4394	3279	0.3248	3390	-0.461	7450	0.6935	7363	0.5748	2138	0.2098	2248
SH2D1A	0.6245	1406	0.0958	1069	0.2458	5292	0.4974	5279	-0.4667	7418	0.7359	7764	0.2835	5013	0.4645	4921	0.8073	235	0.0072	103	0.5966	1569	0.1114	1231	0.6255	1443	0.0986	1134	0.2964	5280	0.4885	5227	-0.2213	5272	0.4939	5252
ANKRD5	0.6244	1407	0.1347	1506	0.6017	2311	0.224	2379	-0.2832	5606	0.5311	5608	0.7122	663	0.0667	706	-0.3624	6170	0.5795	6116	-0.3601	5884	0.5495	5830	0.5507	2121	0.2096	2259	-0.3412	6225	0.5818	6204	0.5042	2915	0.2834	3002
RNFT2	0.6241	1408	0.1351	1507	-0.5729	8095	0.7538	8024	0.7589	435	0.0414	497	0.6496	1166	0.1188	1254	0.655	1297	0.1178	1367	0.5358	2166	0.2096	2264	-0.3988	6446	0.6052	6378	-0.6666	9567	0.8954	9503	0.5511	2424	0.2368	2535
TNFRSF11B	0.624	1409	0.1352	1508	0.6734	1587	0.1554	1676	0.3793	4335	0.4171	4428	0.9258	13	0.0002	6	-0.4657	7339	0.6814	7196	0.3824	3886	0.3715	3985	-0.4075	6556	0.6138	6465	0.487	3325	0.3176	3414	0.3398	4606	0.4421	4696
PCDH10	0.6239	1410	0.0964	1077	-0.6905	9265	0.8985	9527	-0.2678	5513	0.5278	5567	0.7558	387	0.0177	212	0.6906	970	0.0531	627	0.2903	4748	0.4331	4613	0.3744	4068	0.3658	3843	-0.3238	6081	0.5816	6202	0.853	95	0.0022	24
MPZ	0.6239	1411	0.1992	2253	-0.29	5548	0.5081	5361	-0.5546	8377	0.7171	7552	0.6818	901	0.1423	1556	0.7263	657	0.1031	1202	0.6681	925	0.1453	1618	0.7071	767	0.1143	1298	-0.6562	9470	0.8229	8741	-0.7966	10342	0.938	9980
UBE2J1	0.6238	1412	0.1353	1510	0.462	3716	0.352	3785	-0.5654	8502	0.798	8407	0.6844	871	0.0866	922	0.845	109	0.0088	122	0.6934	716	0.0699	782	0.6647	1115	0.1009	1156	-0.4358	7192	0.6685	7109	0.6081	1763	0.1766	1885
PPP1R14D	0.6236	1413	0.1353	1509	-0.5921	8283	0.772	8212	-0.4292	6995	0.6553	6918	0.6591	1087	0.1099	1146	0.7023	860	0.0762	898	0.4777	2718	0.2655	2833	0.7241	635	0.0567	684	0.5663	2388	0.2326	2531	-0.609	8750	0.8166	8664
TGFB2	0.6236	1414	0.0967	1080	0.8671	211	0.0112	132	-0.7604	10264	0.9807	10437	0.4288	3576	0.312	3307	-0.3178	5751	0.5527	5860	0.4019	3643	0.3139	3365	0.7319	570	0.0274	338	-0.5876	8773	0.8632	9161	0.7885	340	0.0139	167
NUDT1	0.6234	1415	0.1353	1511	-0.3149	5695	0.5378	5684	0.8122	200	0.0172	212	0.4865	2906	0.2847	3012	0.5875	1961	0.1839	2051	-0.4678	7166	0.6661	7030	0.5522	2107	0.2082	2242	0.4715	3490	0.334	3592	-0.5042	7654	0.7043	7531
RABL2B	0.6233	1416	0.2835	3042	0.8313	359	0.1029	1092	-0.7192	10002	0.8103	8556	0.7469	441	0.16	1756	0.6114	1723	0.3068	3320	0.7544	367	0.1456	1621	0.8705	55	0.0478	572	-0.8221	10512	0.916	9722	-0.6257	8933	0.6998	7482
COX11	0.6233	1417	0.0968	1082	0.6869	1452	0.1136	1211	0.6076	1802	0.1271	1459	0.3154	4769	0.4403	4654	-0.3204	5768	0.5544	5879	-0.5753	8461	0.8374	8832	0.6303	1415	0.0937	1096	0.5071	3098	0.257	2801	0.4793	3164	0.2699	2845
CYP4F22	0.6233	1418	0.0968	1083	0.7907	593	0.0376	420	-0.6304	9217	0.9027	9578	0.5222	2552	0.201	2190	-0.4334	6958	0.6835	7215	0.5321	2197	0.1665	1839	0.637	1349	0.0886	1043	-0.5111	7990	0.7905	8346	0.3445	4562	0.417	4409
ABCB7	0.6231	1419	0.0968	1084	-0.5007	7401	0.7178	7641	0.652	1343	0.0855	1014	0.5558	2169	0.1653	1810	0.5932	1911	0.1357	1567	0.6415	1158	0.0759	858	0.7724	345	0.0134	182	0.4764	3448	0.2945	3183	0.6255	1576	0.1197	1261
GPR111	0.6231	1420	0.1356	1516	-0.436	6767	0.6328	6744	-0.3943	6591	0.6204	6547	0.4662	3134	0.3025	3219	0.7697	379	0.0342	393	0.5456	2079	0.2003	2170	0.4511	3146	0.3092	3229	-0.6408	9309	0.8714	9248	-0.6392	9068	0.8475	8998
ABHD14A	0.6231	1421	0.2004	2263	-0.8845	10515	0.9739	10364	0.6539	1326	0.1804	1979	0.7474	435	0.08	864	0.5167	2697	0.3167	3434	0.3985	3680	0.3952	4204	0.5836	1829	0.2437	2598	-0.5035	7917	0.6754	7166	0.9132	19	0.0053	46
CETN2	0.6231	1422	0.1357	1517	-0.8814	10504	0.987	10520	0.5087	2822	0.2774	2938	0.6153	1515	0.1517	1660	0.3772	4217	0.4075	4322	0.5738	1804	0.1751	1930	-0.5879	8715	0.8123	8569	-0.3119	5976	0.5586	5951	0.7868	347	0.032	376
AOX1	0.623	1423	0.0969	1085	0.3707	4575	0.4167	4448	0.5025	2894	0.241	2576	0.3593	4367	0.3945	4196	0.6342	1504	0.1	1157	0.3802	3918	0.341	3676	0.4576	3077	0.2655	2800	-0.3108	5963	0.5716	6085	-0.4155	6671	0.6412	6857
MCHR1	0.623	1424	0.097	1086	0.4553	3787	0.3346	3606	0.5723	2180	0.162	1802	-0.3447	5973	0.5777	6118	0.5457	2384	0.1804	2023	-0.341	5683	0.5469	5809	0.3532	4289	0.3915	4093	0.6399	1551	0.1102	1204	-0.5916	8590	0.8385	8905
RNF11	0.6229	1425	0.0971	1087	-0.4795	7210	0.6979	7419	0.5639	2269	0.1697	1872	-0.3072	5663	0.5413	5735	0.6843	1015	0.0576	676	0.3586	4142	0.3666	3929	-0.2919	5421	0.5197	5468	-0.4606	7446	0.7364	7788	0.4793	3168	0.2699	2844
TRAT1	0.6226	1426	0.0976	1096	-0.6424	8798	0.8581	9096	0.4166	3872	0.3442	3666	0.5333	2406	0.189	2062	0.4106	3866	0.3408	3674	0.2204	5014	0.4637	4947	0.6661	1108	0.0658	800	0.3805	4494	0.4086	4356	-0.4129	6641	0.638	6827
CASQ2	0.6226	1427	0.0976	1095	0.5834	2500	0.2083	2201	0.5422	2487	0.1945	2117	-0.595	8844	0.8679	9196	-0.2458	5347	0.5067	5354	0.4147	3485	0.297	3200	0.732	568	0.0274	341	-0.5433	8335	0.8205	8697	-0.359	6067	0.5785	6180
RHBDL1	0.6224	1428	0.1364	1523	-0.5452	7823	0.727	7737	0.6836	1023	0.0932	1104	0.4853	2916	0.2854	3020	0.5645	2199	0.2093	2323	0.3958	3718	0.3563	3831	0.3963	3818	0.373	3915	-0.6826	9708	0.9096	9646	0.582	2047	0.2027	2179
EFTUD2	0.6223	1429	0.1364	1524	-0.8143	10215	0.9596	10223	0.6325	1556	0.1415	1599	0.4851	2921	0.2856	3022	0.4074	3889	0.3735	3987	0.5828	1704	0.1667	1845	0.8186	164	0.0144	195	-0.3045	5917	0.5532	5899	-0.4506	7075	0.6527	6995
HES1	0.6219	1430	0.0985	1108	-0.3993	6411	0.6171	6575	0.5211	2707	0.2185	2354	0.3199	4736	0.4368	4623	0.5905	1930	0.1389	1587	0.3771	3945	0.3447	3713	0.6642	1121	0.0665	806	-0.3448	6255	0.5988	6401	-0.6475	9150	0.8937	9493
CR2	0.6219	1431	0.0985	1107	0.4191	4119	0.3709	3969	0.5922	1958	0.1432	1617	0.5425	2308	0.1789	1959	-0.2615	5402	0.5109	5410	0.5096	2404	0.1904	2068	0.6142	1551	0.1081	1222	0.3402	4929	0.4519	4829	0.6334	1505	0.1128	1187
RRM2B	0.6216	1432	0.0986	1110	0.5665	2687	0.2267	2416	0.4126	3912	0.3503	3721	-0.3729	6269	0.6057	6433	0.5797	2045	0.1492	1693	0.6438	1137	0.0741	842	-0.5418	8146	0.8069	8513	0.5205	2955	0.2412	2622	-0.3109	5655	0.5376	5736
CHSY1	0.6215	1433	0.1371	1530	0.5972	2362	0.2289	2450	-0.4895	7676	0.718	7561	-0.3553	6075	0.5716	6048	-0.3013	5608	0.5289	5612	0.3612	4114	0.3962	4216	0.8173	166	0.0147	198	-0.5179	8055	0.7505	7922	0.6986	892	0.0878	938
GFRA4	0.6215	1434	0.1372	1533	0.6432	1887	0.1814	1953	0.712	766	0.071	831	-0.3754	6296	0.591	6253	0.8383	134	0.0101	141	0.36	4127	0.3971	4224	0.4496	3164	0.3106	3247	0.5853	2167	0.2099	2304	-0.5257	7855	0.7274	7772
CXCL16	0.6214	1435	0.1372	1535	0.5413	2960	0.2816	3019	-0.5138	7958	0.7439	7843	0.6089	1585	0.1583	1730	-0.3129	5703	0.5348	5675	0.7676	299	0.0296	357	0.5878	1786	0.1726	1905	0.7349	669	0.0634	711	-0.6898	9591	0.8945	9514
IFT57	0.6213	1436	0.0989	1111	0.2804	5183	0.4823	5126	-0.4662	7414	0.7356	7759	0.5903	1808	0.1333	1442	-0.4898	7589	0.7536	7929	0.6308	1268	0.085	950	0.7038	787	0.0418	512	-0.5002	7880	0.7786	8217	0.588	1980	0.1557	1646
CDC40	0.6212	1437	0.0991	1113	0.5385	2995	0.256	2751	0.6972	890	0.0491	593	0.5436	2299	0.1779	1942	0.6647	1204	0.0731	868	-0.3913	6244	0.6043	6414	0.7591	417	0.0169	221	-0.5069	7954	0.7861	8308	-0.2073	5260	0.4926	5235
TOM1L2	0.6212	1438	0.203	2284	0.5494	2878	0.3193	3438	0.5366	2549	0.3102	3289	-0.6812	9701	0.8494	8976	-0.696	9788	0.8604	9097	-0.6782	9614	0.8434	8879	0.5695	1968	0.2581	2727	0.5904	2110	0.2684	2913	-0.3865	6352	0.5595	5970
SMURF2	0.6211	1439	0.1374	1537	0.2902	5141	0.4889	5196	-0.3781	6423	0.6053	6392	0.3431	4532	0.4378	4640	-0.399	6572	0.6142	6515	0.3065	4635	0.4439	4728	-0.3493	5889	0.5553	5849	0.8388	130	0.012	125	0.5561	2359	0.2302	2454
ATF3	0.6211	1440	0.0992	1115	0.8452	300	0.0175	210	-0.3996	6646	0.6529	6880	0.4162	3727	0.3267	3479	0.5419	2426	0.1854	2071	0.3284	4429	0.4017	4274	0.6719	1061	0.0618	754	0.2523	5491	0.5133	5483	0.5327	2598	0.2116	2265
NDUFA8	0.6211	1441	0.0993	1118	0.5428	2950	0.2527	2722	0.5555	2349	0.1784	1960	0.6656	1027	0.0698	744	-0.4362	7003	0.6869	7259	0.3688	4032	0.355	3814	0.5151	2481	0.2002	2160	-0.4417	7250	0.7127	7568	0.3293	4707	0.4311	4575
DEGS2	0.621	1442	0.0996	1121	0.3256	4916	0.4542	4851	0.4038	4040	0.3605	3840	0.5919	1792	0.132	1424	0.2908	4988	0.463	4900	0.4014	3648	0.3147	3376	0.5175	2461	0.1975	2138	-0.4946	7825	0.7727	8158	-0.7954	10331	0.9856	10480
MRRF	0.6208	1443	0.0997	1122	0.6519	1791	0.145	1558	0.4191	3843	0.3402	3623	0.4154	3734	0.3275	3487	0.7849	317	0.0121	170	0.4354	3209	0.273	2912	0.6113	1582	0.1097	1248	-0.6841	9723	0.9446	10054	0.5965	1896	0.1478	1579
CXCR2	0.6208	1444	0.1376	1540	-0.3994	6414	0.6017	6399	0.3451	4675	0.4495	4765	0.6977	765	0.0765	831	-0.3699	6247	0.5852	6190	0.6568	1017	0.1005	1131	0.4829	2819	0.277	2905	-0.5642	8548	0.798	8432	0.7324	639	0.0639	712
NPVF	0.6206	1445	0.1378	1544	-0.841	10363	0.972	10347	-0.3602	6245	0.5889	6222	-0.5149	7907	0.7362	7813	0.303	4897	0.4723	4988	0.6275	1307	0.1264	1392	0.5035	2606	0.2539	2703	0.3489	4854	0.4618	4935	0.3608	4419	0.4266	4509
FEM1B	0.6206	1446	0.1378	1545	-0.6458	8826	0.8253	8746	0.797	251	0.0224	280	-0.4847	7564	0.7025	7455	0.6667	1183	0.1066	1251	-0.3949	6281	0.5877	6233	-0.4392	6961	0.6482	6865	-0.5359	8243	0.7687	8126	0.6539	1311	0.1296	1372
TRIP6	0.6201	1447	0.1002	1124	0.6667	1647	0.1318	1426	0.501	2911	0.2426	2588	-0.4331	6986	0.6857	7295	0.5373	2476	0.1907	2121	0.7194	575	0.0294	353	-0.5087	7748	0.7715	8126	0.5466	2639	0.2094	2297	0.369	4343	0.3929	4176
RLIM	0.6198	1448	0.1003	1127	-0.741	9713	0.9346	9935	0.7184	717	0.0377	451	0.5777	1940	0.1454	1589	0.6086	1757	0.1214	1413	0.4082	3567	0.305	3301	-0.3819	6239	0.6098	6430	-0.3892	6691	0.6511	6907	0.6218	1619	0.1231	1310
BAP1	0.6198	1449	0.2861	3070	-0.4288	6705	0.548	5785	-0.4996	7790	0.6015	6358	0.5468	2266	0.3591	3829	-0.7125	9917	0.7996	8417	0.6764	845	0.2305	2461	0.6827	975	0.2293	2457	-0.46	7441	0.5777	6152	-0.5281	7879	0.6107	6496
PXDNL	0.6198	1450	0.1003	1126	0.5311	3064	0.2632	2827	0.5962	1913	0.1392	1571	-0.4546	7238	0.7131	7563	-0.3709	6261	0.6037	6401	0.5212	2301	0.1769	1948	0.3781	4025	0.3615	3792	-0.2692	5711	0.5434	5784	0.6948	932	0.0579	653
ZNF226	0.6195	1451	0.1382	1549	-0.4631	7043	0.6548	6976	-0.5636	8477	0.7963	8387	0.5252	2514	0.2417	2596	0.6684	1168	0.1046	1226	0.486	2637	0.2571	2741	-0.3877	6306	0.5933	6229	0.6691	1232	0.1197	1314	-0.6708	9399	0.8782	9322
PRKD2	0.6193	1452	0.2054	2305	0.6887	1434	0.1853	1991	0.8435	126	0.0235	287	-0.6199	9103	0.7848	8277	-0.5813	8593	0.7367	7776	0.6483	1095	0.1642	1812	0.5873	1792	0.2399	2563	-0.6476	9377	0.8135	8601	0.5163	2777	0.3254	3476
PLAA	0.6192	1453	0.1382	1548	-0.8218	10257	0.9637	10265	0.6808	1050	0.0966	1121	0.7718	322	0.0312	358	0.5735	2111	0.2	2217	0.4048	3611	0.3462	3727	0.393	3852	0.3769	3949	0.5853	2169	0.2099	2303	0.4685	3299	0.316	3381
POLDIP3	0.6192	1454	0.1006	1128	-0.5552	7920	0.7691	8175	0.3874	4251	0.3805	4044	0.548	2249	0.1729	1884	0.5149	2716	0.2168	2383	0.7675	302	0.0121	147	0.6691	1086	0.0637	777	0.3895	4403	0.3997	4254	0.4988	2969	0.2481	2640
WEE1	0.619	1455	0.1008	1129	0.6435	1881	0.1526	1642	0.3785	4341	0.3894	4157	-0.3169	5735	0.5508	5830	0.352	4493	0.4084	4333	0.6741	872	0.0537	614	0.3204	4601	0.4277	4482	-0.4684	7553	0.7459	7883	0.652	1328	0.096	1009
MCOLN1	0.6189	1456	0.1384	1553	-0.4564	6977	0.6493	6908	0.4576	3387	0.3314	3532	0.5098	2682	0.2585	2750	0.4887	2978	0.2873	3088	0.3171	4546	0.4363	4648	0.517	2465	0.2419	2582	-0.5254	8136	0.758	8018	0.7375	609	0.0614	685
TCEB1	0.6189	1457	0.1008	1130	0.7651	759	0.052	558	0.4514	3458	0.3022	3195	0.4957	2818	0.2339	2503	0.7599	431	0.0178	236	0.2708	4858	0.4467	4756	-0.3883	6313	0.6184	6521	-0.5286	8171	0.8065	8523	-0.3557	6035	0.5744	6141
MOB3C	0.6189	1458	0.1009	1133	-0.8927	10535	0.994	10594	-0.3488	6138	0.5925	6263	0.5889	1829	0.1341	1458	0.6242	1612	0.1075	1267	0.4599	2932	0.2449	2612	0.5044	2602	0.2115	2276	-0.6392	9290	0.9116	9669	-0.2977	5563	0.5271	5616
CYP4X1	0.6188	1459	0.1009	1134	-0.3596	6042	0.5799	6172	-0.7467	10171	0.9757	10372	0.533	2409	0.1893	2066	0.5853	1984	0.1437	1634	0.5623	1899	0.1401	1565	0.4827	2822	0.2373	2542	0.2957	5284	0.4888	5234	-0.3196	5709	0.544	5787
SLC4A4	0.6187	1460	0.1009	1131	0.3664	4607	0.4203	4488	-0.3146	5829	0.5621	5950	0.7506	417	0.0197	233	0.3659	4344	0.3925	4174	0.4195	3429	0.2914	3132	-0.4763	7377	0.73	7721	-0.4327	7147	0.7016	7447	0.5299	2632	0.2148	2300
MAP3K13	0.6187	1461	0.1009	1132	-0.5657	8019	0.7794	8286	-0.5579	8408	0.8331	8769	-0.4274	6929	0.6792	7229	-0.5803	8579	0.8504	8950	0.7439	429	0.0189	224	-0.6286	9156	0.903	9549	-0.4234	7062	0.6904	7334	0.5226	2712	0.2236	2397
OR10H2	0.6187	1462	0.1387	1556	0.3087	5035	0.4782	5090	0.8079	222	0.0185	234	-0.2689	5406	0.5127	5427	0.4898	2967	0.2863	3079	-0.4204	6598	0.6145	6527	-0.2616	5255	0.5011	5268	0.3714	4616	0.4439	4729	-0.4065	6580	0.6123	6513
PCDHA5	0.6186	1463	0.1012	1135	0.9043	119	0.0045	64	0.7542	465	0.0204	253	0.3807	4126	0.3693	3939	-0.39	6463	0.6287	6649	-0.2603	5136	0.4824	5130	0.7146	717	0.036	449	-0.2726	5726	0.5453	5804	-0.3673	6146	0.5868	6273
GLIS3	0.6186	1464	0.1387	1557	0.6602	1707	0.1672	1801	0.747	510	0.0483	579	0.5046	2734	0.2633	2800	-0.3599	6142	0.5761	6082	0.3097	4605	0.441	4701	0.6004	1677	0.1599	1788	0.6423	1527	0.1479	1612	0.6325	1517	0.1516	1619
KHK	0.6184	1465	0.2065	2320	-0.7571	9846	0.884	9367	-0.4637	7389	0.6388	6731	0.6056	1619	0.229	2451	-0.6085	8899	0.7682	8078	0.6682	923	0.1453	1617	0.4646	3016	0.3446	3605	0.7968	280	0.0532	600	0.5445	2487	0.302	3206
ST6GALNAC5	0.618	1466	0.1018	1140	0.338	4826	0.4436	4730	-0.2544	5453	0.5215	5487	0.5751	1964	0.1479	1616	0.7727	359	0.0151	197	0.7348	479	0.0223	262	0.5007	2639	0.2163	2326	0.5543	2551	0.1995	2186	0.3667	4370	0.3945	4200
BBOX1	0.6176	1467	0.102	1142	-0.6757	9126	0.8867	9390	-0.6381	9300	0.91	9662	0.701	741	0.0448	477	0.671	1147	0.0689	823	0.3913	3772	0.3279	3518	0.4205	3501	0.3102	3242	-0.6753	9649	0.939	9985	0.4532	3449	0.2987	3164
GBA3	0.6176	1468	0.102	1143	-0.8632	10446	0.9886	10535	0.6888	963	0.0559	666	-0.5609	8439	0.8312	8803	0.7428	523	0.0244	301	0.4349	3218	0.2731	2914	0.3753	4058	0.365	3826	-0.675	9646	0.9388	9981	0.4481	3511	0.3047	3240
GPR180	0.6176	1469	0.1021	1148	0.7756	684	0.0464	501	-0.6506	9428	0.9194	9775	0.3314	4627	0.4264	4523	-0.3149	5719	0.5504	5830	0.6655	945	0.0599	674	0.5855	1812	0.1318	1483	-0.468	7546	0.7453	7876	0.6746	1103	0.0755	818
TUBB	0.6175	1470	0.1021	1149	-0.824	10271	0.9779	10419	0.6854	1000	0.0584	692	0.4306	3555	0.31	3288	0.815	204	0.006	87	-0.443	6862	0.6758	7133	0.6613	1149	0.0687	829	0.6708	1215	0.0811	899	-0.684	9522	0.9252	9844
SLC40A1	0.6175	1471	0.1401	1572	0.2384	5303	0.5058	5336	0.6267	1594	0.1488	1656	0.4855	2913	0.2852	3017	0.2964	4944	0.4774	5037	0.4476	3072	0.2989	3223	0.3078	4707	0.4571	4804	-0.3574	6370	0.5968	6374	0.6545	1302	0.1288	1360
MFSD10	0.6175	1472	0.2882	3099	0.4225	4078	0.4499	4792	0.4814	3117	0.4158	4407	-0.7347	10119	0.8301	8794	0.8031	244	0.104	1219	-0.6101	8866	0.6804	7175	0.7606	408	0.1435	1635	-0.5682	8591	0.6538	6936	-0.3047	5610	0.5012	5336
TCN2	0.6173	1473	0.1403	1578	-0.6227	8584	0.8033	8529	-0.3932	6573	0.6196	6534	0.6229	1425	0.1428	1563	-0.3697	6245	0.585	6187	0.3586	4143	0.3993	4246	0.753	447	0.0404	498	0.4464	3767	0.3599	3881	0.6237	1598	0.1598	1700
EIF1	0.6173	1474	0.1403	1580	0.5639	2723	0.2593	2787	0.4391	3607	0.3501	3719	0.7098	674	0.0683	724	0.4779	3100	0.2973	3200	0.5507	2023	0.1967	2135	-0.2986	5464	0.5183	5457	-0.6691	9599	0.8977	9531	-0.4105	6621	0.6153	6552
AGXT2	0.6172	1475	0.1407	1583	-0.4764	7180	0.6652	7085	-0.6992	9862	0.9228	9810	-0.4521	7213	0.6683	7133	0.5109	2763	0.2635	2845	0.442	3146	0.3038	3288	-0.2479	5208	0.4971	5231	0.4527	3705	0.3535	3825	-0.3559	6039	0.5616	5992
IL5	0.6169	1476	0.1026	1154	0.427	4047	0.3639	3892	0.5375	2534	0.1994	2176	0.6091	1583	0.1165	1234	0.5712	2136	0.1569	1760	0.4322	3257	0.2767	2962	-0.3322	5729	0.5543	5840	0.4083	4201	0.3763	4056	0.6455	1386	0.1024	1070
PDE1C	0.6163	1477	0.289	3106	0.7777	668	0.1549	1670	-0.5982	8842	0.6817	7184	-0.4488	7168	0.559	5912	0.8308	155	0.0779	930	0.6298	1281	0.2763	2957	0.565	2011	0.3345	3481	-0.7527	10211	0.8487	8997	-0.9337	10652	0.9828	10441
FOXL1	0.6161	1478	0.1415	1593	-0.7304	9622	0.9014	9572	-0.6254	9149	0.8588	9055	0.5305	2437	0.2384	2551	0.6813	1043	0.0927	1083	-0.3204	5508	0.5172	5503	-0.3239	5653	0.5327	5615	0.6334	1624	0.157	1714	0.5973	1888	0.1878	2034
TEP1	0.616	1479	0.1029	1156	0.5862	2479	0.2058	2181	0.3191	4899	0.4521	4786	0.7496	422	0.0201	238	-0.5299	8034	0.7974	8390	0.624	1345	0.0905	1011	-0.6131	8982	0.8854	9358	-0.2895	5824	0.556	5928	0.5083	2870	0.2384	2548
PLA2G3	0.6159	1480	0.1029	1155	-0.3762	6179	0.5952	6324	-0.259	5475	0.5234	5513	0.511	2667	0.2141	2314	0.4284	3696	0.3179	3457	0.6923	732	0.043	492	0.5399	2224	0.1726	1906	-0.7644	10285	0.982	10467	-0.3017	5586	0.5303	5654
MAFB	0.6158	1481	0.103	1157	0.4573	3765	0.3324	3585	0.7588	437	0.0186	236	-0.4275	6933	0.6794	7232	0.3427	4577	0.419	4444	-0.3145	5462	0.5188	5523	0.6885	916	0.0507	609	0.3483	4857	0.4445	4737	-0.36	6076	0.5797	6193
APBB3	0.6153	1482	0.1419	1595	0.6146	2174	0.2122	2234	0.4608	3346	0.3279	3492	0.6632	1052	0.106	1105	0.5528	2315	0.2211	2434	0.631	1266	0.1228	1343	0.4567	3085	0.3027	3167	-0.7427	10147	0.9501	10111	0.568	2225	0.2173	2329
PNPLA8	0.6152	1483	0.2093	2342	0.7836	630	0.0923	967	-0.6644	9574	0.8321	8757	-0.2719	5419	0.4978	5256	0.6572	1276	0.173	1934	-0.2618	5142	0.4795	5101	-0.6837	9701	0.8524	9026	0.7605	491	0.0823	908	-0.3891	6378	0.5618	5996
PPIH	0.615	1484	0.1422	1599	-0.2722	5460	0.5198	5474	0.6661	1207	0.1093	1257	0.4175	3714	0.3579	3817	0.6032	1815	0.1696	1892	-0.4571	7028	0.6543	6919	0.6577	1171	0.107	1216	0.6456	1479	0.1444	1575	0.5866	1996	0.1986	2139
COX7B2	0.6148	1485	0.1038	1166	0.6277	2047	0.1667	1794	-0.5742	8589	0.8487	8945	0.3914	4014	0.3571	3808	0.4991	2870	0.2353	2562	0.5784	1758	0.1275	1406	0.548	2145	0.1641	1826	0.6834	1099	0.0714	796	-0.288	5496	0.5206	5551
NFKBIE	0.6148	1486	0.1426	1607	-0.7292	9616	0.9006	9561	0.5354	2560	0.2496	2671	0.6551	1123	0.1132	1203	-0.5472	8210	0.7705	8112	0.5439	2094	0.2022	2187	-0.4031	6495	0.6092	6416	-0.2849	5796	0.5432	5780	0.6319	1523	0.1523	1625
MTCH2	0.6148	1487	0.1426	1606	-0.6069	8433	0.7866	8372	0.6441	1433	0.1304	1484	0.6879	836	0.0837	894	-0.3578	6117	0.5746	6058	0.6672	934	0.0908	1016	0.8793	42	0.0036	64	-0.6235	9161	0.8561	9074	0.6151	1682	0.1696	1803
AIF1	0.6147	1488	0.1038	1165	0.3094	5032	0.4665	4957	0.5737	2167	0.1604	1782	0.5539	2186	0.1674	1824	-0.5784	8560	0.8484	8927	0.7357	474	0.0222	261	-0.6404	9280	0.9133	9669	0.2968	5276	0.4883	5226	0.8537	94	0.0021	20
LRFN1	0.6142	1489	0.1043	1169	0.4171	4144	0.3732	3990	0.2649	5231	0.4918	5184	0.4032	3877	0.344	3654	-0.3996	6578	0.6408	6785	0.5196	2313	0.1782	1959	-0.5752	8554	0.8448	8932	-0.2463	5635	0.5329	5676	0.2786	5063	0.4666	4966
PPP5C	0.6142	1490	0.1429	1613	0.4072	4240	0.4036	4308	0.3674	4450	0.4299	4554	-0.3468	5990	0.5636	5971	0.522	2641	0.2531	2733	0.5126	2378	0.2328	2484	0.3924	3864	0.3774	3956	0.4531	3696	0.3534	3822	-0.852	10535	0.9903	10542
ING3	0.6141	1491	0.1046	1172	0.6229	2099	0.171	1853	-0.3176	5854	0.5639	5969	-0.351	6028	0.5845	6186	0.5258	2600	0.2043	2268	0.5819	1719	0.1241	1359	0.6208	1488	0.1032	1179	-0.3036	5910	0.5656	6031	0.3317	4682	0.4288	4539
CPO	0.614	1492	0.1047	1173	-0.3894	6313	0.6078	6468	-0.3917	6559	0.6432	6776	-0.2847	5498	0.5233	5547	0.7696	380	0.0158	209	0.5755	1787	0.1301	1436	0.6852	950	0.052	630	-0.5285	8170	0.8064	8522	0.6537	1313	0.0939	988
SLC25A11	0.6138	1493	0.1432	1615	-0.2504	5396	0.5134	5412	-0.3566	6208	0.5853	6180	-0.4852	7566	0.7028	7460	0.7408	540	0.0509	603	0.6641	955	0.0939	1054	0.5825	1843	0.1785	1959	-0.4001	6807	0.6349	6771	0.3093	4872	0.4625	4927
GZMH	0.6138	1494	0.1048	1174	-0.6628	9009	0.8752	9286	-0.3283	5954	0.5736	6062	0.685	865	0.0546	573	0.2687	5109	0.4778	5041	0.6597	989	0.0635	711	0.5828	1838	0.1347	1512	0.486	3337	0.2835	3068	0.3557	4461	0.4051	4294
STK17B	0.6137	1495	0.0356	408	0.7259	1064	0.0361	400	0.1855	5362	0.5158	5432	0.317	4760	0.3921	4170	-0.3999	6584	0.7341	7752	0.4328	3248	0.1794	1975	0.4974	2680	0.1246	1403	-0.3293	6118	0.6545	6946	-0.5346	7954	0.8676	9206
HIST1H2BG	0.6137	1496	0.1437	1619	0.3602	4662	0.4422	4713	0.3605	4519	0.4361	4636	0.7249	576	0.058	618	0.3066	4876	0.4689	4960	0.5582	1946	0.1899	2066	-0.3149	5573	0.5271	5550	0.6137	1835	0.1777	1953	0.3818	4229	0.4058	4299
VKORC1L1	0.6137	1497	0.2108	2360	-0.386	6284	0.5588	5929	0.6077	1801	0.2358	2515	-0.5376	8154	0.6918	7356	0.3536	4473	0.451	4781	0.7236	542	0.0938	1051	0.3202	4602	0.4629	4863	-0.438	7214	0.6195	6612	0.4803	3154	0.3521	3734
NCAN	0.6137	1498	0.2108	2361	0.4991	3370	0.3541	3796	0.5038	2876	0.3383	3597	0.7531	400	0.0749	816	0.7944	285	0.0487	567	0.6478	1101	0.1648	1823	0.4357	3322	0.3713	3897	-0.5095	7978	0.6796	7216	0.5748	2139	0.2741	2901
GNAQ	0.6136	1499	0.1438	1621	-0.4099	6524	0.6104	6496	0.5813	2062	0.1976	2152	-0.4056	6655	0.6222	6600	-0.2768	5466	0.5183	5482	0.4749	2747	0.2695	2875	0.5635	2021	0.1965	2132	0.7374	647	0.0616	691	0.4405	3580	0.3458	3665
PPP2R2D	0.6134	1500	0.144	1625	-0.4435	6838	0.6387	6808	-0.7174	9989	0.934	9939	0.608	1594	0.1591	1741	0.732	600	0.0563	661	0.664	956	0.0939	1053	0.7222	650	0.058	702	0.3279	5043	0.4799	5129	-0.4574	7153	0.6597	7069
MAEL	0.6132	1501	0.1055	1178	0.6346	1976	0.1596	1729	0.3529	4604	0.4195	4459	-0.3617	6150	0.594	6297	0.428	3702	0.3184	3461	-0.621	8974	0.8889	9386	0.5392	2231	0.1736	1915	0.4651	3559	0.308	3304	-0.6584	9281	0.9034	9612
SF3B14	0.6132	1502	0.1441	1627	0.3595	4668	0.4429	4721	0.4467	3521	0.3428	3651	0.707	693	0.0706	760	0.7702	372	0.034	389	-0.5507	8147	0.763	7991	0.5863	1803	0.1736	1912	-0.5853	8749	0.8185	8672	-0.692	9612	0.8965	9529
2017-12-01	0.613	1503	0.1057	1180	0.4046	4264	0.3863	4127	-0.7799	10355	0.9872	10504	0.9263	12	0.0001	1	0.6461	1394	0.088	1037	0.733	488	0.0235	279	0.481	2829	0.2391	2556	0.386	4439	0.4041	4300	-0.4593	7171	0.6946	7430
RPS7	0.6128	1504	0.1057	1186	-0.3431	5919	0.5677	6036	0.62	1677	0.1152	1336	0.5414	2319	0.1803	1974	0.7367	561	0.0275	321	-0.3748	6048	0.5857	6210	0.5324	2306	0.1834	2009	0.5925	2086	0.1575	1727	-0.5206	7797	0.7613	8114
TMEM86B	0.6128	1505	0.1057	1183	-0.3272	5787	0.5557	5887	0.521	2709	0.2186	2358	-0.4045	6640	0.6489	6910	-0.359	6133	0.5916	6273	0.4812	2688	0.2225	2380	0.5168	2468	0.1982	2144	0.5647	2412	0.1874	2049	0.7422	570	0.0308	361
BIK	0.6128	1506	0.1447	1632	-0.6424	8799	0.822	8717	-0.4291	6993	0.6551	6915	-0.5134	7897	0.7353	7799	0.574	2106	0.1992	2206	0.5653	1877	0.183	2002	0.4994	2657	0.2583	2730	0.6394	1557	0.1506	1637	0.6805	1054	0.1051	1098
KIF11	0.6125	1507	0.145	1636	-0.5461	7837	0.728	7755	0.519	2731	0.2656	2823	-0.586	8729	0.8144	8603	0.3486	4517	0.4361	4629	-0.3778	6072	0.57	6029	0.7203	665	0.059	712	0.3523	4822	0.459	4901	0.7222	714	0.0714	775
ASIC2	0.6125	1508	0.106	1189	-0.4331	6738	0.6506	6922	0.299	5050	0.4685	4965	0.3426	4538	0.4147	4405	0.7376	559	0.0268	318	0.5703	1827	0.1338	1480	0.5247	2397	0.1907	2080	0.7547	520	0.0246	270	-0.5608	8239	0.8068	8567
PPP1R8	0.6125	1509	0.106	1190	0.5159	3224	0.277	2975	0.2605	5254	0.4929	5204	0.6991	752	0.046	486	0.5317	2529	0.1977	2193	0.4426	3137	0.2644	2823	0.6194	1500	0.1043	1194	-0.481	7695	0.7583	8024	0.4717	3260	0.2782	2949
PTPRE	0.6124	1510	0.1454	1640	-0.5017	7419	0.6877	7306	0.5097	2808	0.2766	2929	0.725	574	0.0579	617	0.7693	382	0.0344	398	0.4756	2739	0.2687	2865	0.5493	2137	0.2108	2269	-0.6544	9450	0.8846	9383	0.7429	567	0.0581	656
AQP1	0.6122	1511	0.2124	2373	0.4069	4242	0.4231	4525	0.7613	421	0.0737	862	0.5698	2034	0.2656	2818	0.5867	1973	0.2544	2742	0.5371	2155	0.2758	2948	-0.7499	10180	0.9167	9712	0.3649	4694	0.4613	4930	0.8385	122	0.03	352
DPP7	0.6119	1512	0.146	1644	0.2336	5308	0.5062	5342	0.748	505	0.0475	568	0.5721	2008	0.196	2134	-0.6921	9756	0.9155	9693	0.4296	3290	0.3199	3429	-0.2873	5403	0.5117	5403	0.753	534	0.0508	574	-0.5172	7766	0.7181	7668
RC3H2	0.6118	1513	0.146	1643	0.5852	2484	0.2406	2599	0.7514	484	0.0459	548	0.8047	209	0.0192	222	0.3207	4769	0.4586	4852	0.5799	1743	0.1695	1875	-0.3302	5709	0.5379	5655	-0.5354	8239	0.7681	8114	-0.5386	7993	0.7407	7916
SSTR2	0.6118	1514	0.1064	1192	0.6003	2327	0.193	2063	-0.39	6542	0.6411	6758	0.5911	1800	0.1326	1433	0.3131	4830	0.4476	4742	0.5946	1589	0.1129	1247	-0.3062	5515	0.5302	5587	-0.2608	5682	0.5386	5737	0.7257	685	0.04	461
TBL3	0.6118	1515	0.1064	1193	0.64	1919	0.1552	1674	0.3459	4671	0.4271	4526	0.7013	739	0.0447	476	0.3888	4087	0.3659	3921	-0.5049	7559	0.7561	7921	0.8329	130	0.0029	57	0.5274	2879	0.2329	2535	-0.5521	8137	0.7961	8476
STAC3	0.6117	1516	0.1461	1646	0.7068	1265	0.1218	1320	-0.678	9694	0.9055	9608	0.7305	530	0.0542	565	0.6975	916	0.0787	942	0.3843	3869	0.3694	3971	0.6218	1477	0.1391	1579	-0.6791	9684	0.9064	9616	0.8315	152	0.0151	190
MAGOH	0.6116	1517	0.2129	2378	-0.3495	5981	0.5353	5659	0.7162	731	0.113	1308	-0.5846	8710	0.7421	7856	0.6911	968	0.1371	1578	-0.5898	8630	0.7376	7755	0.8358	119	0.0266	331	0.7813	368	0.0655	736	0.53	2627	0.3151	3367
HIF3A	0.6113	1518	0.1462	1648	0.7156	1175	0.1158	1249	-0.4332	7042	0.6595	6948	0.6104	1571	0.1566	1710	0.5994	1852	0.1737	1947	-0.5162	7721	0.7229	7617	0.7281	606	0.0538	653	-0.7123	9944	0.931	9881	0.707	830	0.0815	861
PHF7	0.6113	1519	0.1463	1651	-0.39	6320	0.5937	6315	-0.4978	7770	0.7269	7658	-0.7823	10381	0.9759	10395	0.9148	22	0.0005	14	0.3965	3704	0.3556	3822	0.6362	1356	0.1263	1422	0.2253	5549	0.5257	5606	0.3214	4780	0.4553	4836
ALKBH5	0.611	1520	0.107	1199	0.3803	4480	0.4088	4351	-0.5868	8708	0.8605	9085	0.8399	107	0.0025	27	0.4709	3174	0.2668	2882	0.6857	768	0.0474	529	0.4421	3252	0.2831	2975	0.5608	2463	0.1924	2103	0.6381	1453	0.1085	1139
DMRTC2	0.6109	1521	0.2138	2384	-0.3693	6124	0.5486	5791	0.756	454	0.0773	917	0.731	525	0.0961	995	-0.5553	8293	0.709	7493	-0.3986	6322	0.5495	5832	0.6244	1453	0.2025	2179	0.3533	4808	0.4683	5000	0.5353	2577	0.3099	3290
CYB561D2	0.6109	1522	0.1464	1652	0.7556	823	0.0848	882	-0.4809	7579	0.7084	7464	0.7441	457	0.0467	493	0.3649	4357	0.421	4467	0.4679	2836	0.2778	2971	-0.5814	8625	0.8053	8488	0.3747	4570	0.4409	4695	-0.3289	5790	0.5396	5749
HIATL1	0.6108	1523	0.1465	1653	0.7039	1289	0.1246	1348	0.3957	4143	0.3991	4258	0.3972	3936	0.382	4063	0.6881	992	0.087	1025	0.6285	1297	0.1259	1378	0.5424	2206	0.2167	2336	-0.5555	8465	0.7878	8326	0.7571	488	0.0491	551
TCEA1	0.6106	1524	0.1467	1656	0.4598	3739	0.3556	3812	0.8074	223	0.0186	235	-0.5306	8066	0.753	7972	-0.435	6988	0.6508	6890	0.4194	3433	0.3319	3568	0.7211	657	0.0583	707	0.496	3221	0.3093	3323	0.8409	120	0.0126	145
TXNDC12	0.6106	1525	0.1074	1201	0.6778	1544	0.1224	1323	-0.4581	7325	0.7259	7639	0.4762	3027	0.2535	2710	0.4793	3085	0.2565	2764	0.5679	1846	0.1356	1500	-0.271	5301	0.5056	5320	0.3361	4962	0.4553	4863	0.4825	3124	0.2669	2808
THRA	0.6105	1526	0.1075	1202	0.6391	1931	0.1561	1686	0.3179	4909	0.453	4792	0.359	4371	0.3951	4206	0.4609	3278	0.279	2990	0.529	2221	0.1696	1876	0.3743	4069	0.3658	3841	0.338	4947	0.4536	4847	-0.4002	6495	0.6242	6654
HLX	0.6102	1527	0.1077	1205	-0.5932	8289	0.8072	8569	-0.4004	6658	0.6537	6888	-0.453	7220	0.71	7532	-0.4874	7561	0.7498	7897	0.4249	3355	0.2852	3060	0.5882	1778	0.1296	1451	0.4314	3955	0.3495	3778	0.3741	4304	0.3875	4121
FLNA	0.6102	1528	0.1474	1663	0.7946	563	0.0557	597	0.7728	363	0.0333	409	-0.4552	7243	0.6723	7164	-0.4992	7699	0.7173	7578	-0.5858	8576	0.803	8467	0.6208	1489	0.14	1590	0.7687	437	0.042	470	0.4138	3874	0.3707	3934
ABCB10	0.61	1529	0.1476	1664	0.2991	5095	0.4844	5149	0.4859	3068	0.3007	3169	-0.4842	7561	0.7021	7452	-0.6496	9327	0.8781	9275	0.4111	3532	0.3398	3669	0.7941	245	0.0227	287	-0.3199	6045	0.564	6016	0.2958	4962	0.4721	5042
CILP	0.6097	1530	0.1081	1206	0.6823	1501	0.1177	1270	0.4541	3423	0.2993	3151	0.5162	2614	0.2081	2260	0.576	2085	0.1531	1724	0.4388	3176	0.2686	2863	0.7886	265	0.0091	130	-0.4735	7609	0.7506	7924	-0.5038	7649	0.7439	7949
MAPK8IP2	0.6097	1531	0.2148	2395	-0.5154	7549	0.6495	6911	0.7132	752	0.1155	1339	0.3827	4110	0.4273	4530	0.7521	470	0.0796	954	0.4431	3123	0.3537	3798	-0.6579	9468	0.8236	8694	-0.3119	5975	0.5284	5633	0.4864	3084	0.3478	3681
GCLC	0.6096	1532	0.1083	1207	0.7482	884	0.0639	674	-0.5657	8505	0.8398	8862	0.5661	2068	0.1569	1722	-0.4465	7118	0.6989	7394	0.3137	4574	0.4149	4443	-0.3634	6023	0.5885	6177	-0.4344	7176	0.7032	7474	-0.379	6273	0.6012	6409
NPTXR	0.6095	1533	0.2148	2394	-0.7985	10098	0.9178	9767	-0.4865	7641	0.6589	6942	0.5478	2253	0.2835	2996	0.6313	1532	0.2033	2255	0.5008	2477	0.3024	3268	-0.3538	5929	0.5288	5568	-0.4191	7024	0.6021	6438	0.8278	165	0.0349	412
DARC	0.6092	1534	0.1086	1211	-0.8252	10278	0.9787	10425	0.5728	2177	0.1614	1797	-0.3519	6042	0.5851	6196	-0.3811	6353	0.6151	6519	0.5285	2228	0.1702	1881	0.4754	2898	0.2454	2615	-0.6751	9647	0.939	9986	0.4025	3990	0.3569	3782
NRGN	0.6092	1535	0.1086	1212	0.885	169	0.0071	95	0.5804	2073	0.1538	1706	0.3718	4226	0.3804	4046	0.5593	2247	0.1678	1874	0.4133	3501	0.2989	3224	0.5201	2437	0.1952	2117	-0.335	6164	0.5916	6307	0.3901	4141	0.3706	3932
ACTN3	0.609	1536	0.109	1216	0.8431	309	0.018	216	0.7372	575	0.0281	333	0.3755	4189	0.3758	4001	0.6345	1502	0.0998	1153	-0.3215	5516	0.527	5610	0.5028	2619	0.2139	2303	-0.6332	9240	0.9062	9615	0.3959	4080	0.3636	3868
PRSS23	0.609	1537	0.109	1217	-0.4673	7081	0.6855	7276	0.5671	2231	0.1669	1846	0.5744	1976	0.1491	1628	0.4996	2862	0.2347	2547	0.4972	2516	0.2033	2206	0.4826	2823	0.2375	2546	0.3257	5071	0.4662	4984	0.289	5001	0.461	4903
PNP	0.6089	1538	0.1485	1672	0.7945	566	0.0558	599	0.7564	453	0.0428	520	-0.5495	8281	0.7739	8172	0.4822	3051	0.2932	3156	0.831	111	0.0092	106	0.4785	2856	0.2814	2953	-0.6444	9348	0.8755	9295	0.4716	3262	0.3141	3347
GTPBP4	0.6088	1539	0.1091	1218	0.7531	845	0.0603	642	0.6406	1461	0.0967	1122	0.3202	4734	0.4366	4620	0.5655	2193	0.1614	1817	0.5357	2169	0.163	1805	0.5544	2088	0.1587	1776	0.2925	5307	0.4905	5262	0.5872	1988	0.1563	1654
PTAR1	0.6087	1540	0.1093	1219	0.6539	1765	0.143	1534	0.449	3489	0.3059	3236	0.6073	1601	0.1186	1250	0.324	4749	0.4376	4638	-0.5219	7790	0.7776	8155	-0.4022	6486	0.636	6730	0.4847	3353	0.2853	3080	0.317	4821	0.4407	4677
NPY1R	0.6087	1541	0.1094	1222	0.6739	1581	0.1261	1363	-0.6852	9753	0.9446	10054	0.4498	3318	0.2851	3015	-0.3473	6010	0.5802	6122	0.4834	2670	0.2194	2355	0.6111	1585	0.1097	1245	-0.3176	6021	0.5764	6138	0.7849	357	0.0153	192
ZNF212	0.6087	1542	0.1489	1680	-0.5028	7427	0.6881	7311	-0.7059	9916	0.9271	9855	0.5351	2385	0.2334	2496	-0.4563	7234	0.6723	7100	0.5441	2093	0.202	2185	0.5216	2417	0.2372	2539	-0.6485	9390	0.8788	9327	-0.5621	8255	0.7663	8169
GEM	0.6086	1543	0.1094	1221	0.5879	2463	0.2038	2170	-0.5337	8168	0.8087	8539	0.6643	1041	0.0705	757	-0.3847	6390	0.621	6569	0.4406	3159	0.2666	2843	0.4751	2900	0.2457	2617	0.5607	2466	0.1926	2105	0.442	3571	0.3118	3322
LIG3	0.6084	1544	0.149	1682	0.5724	2612	0.2509	2699	0.5389	2518	0.2466	2629	0.5717	2012	0.1963	2140	0.6745	1107	0.0991	1144	0.6824	799	0.0782	888	0.7305	587	0.0523	640	0.4135	4143	0.398	4235	-0.4457	7008	0.6467	6930
FOSL1	0.6083	1545	0.1491	1684	0.6549	1755	0.171	1852	0.6282	1588	0.1467	1643	0.3311	4630	0.4474	4718	0.5769	2074	0.1952	2171	0.6578	1012	0.0999	1121	0.584	1824	0.1768	1941	-0.82	10505	0.9866	10514	-0.3428	5910	0.5498	5862
TRMU	0.6081	1546	0.2969	3199	-0.3487	5970	0.5143	5423	0.7325	607	0.1813	1992	0.5838	1882	0.3265	3477	-0.7624	10259	0.8587	9067	-0.5269	7847	0.5979	6357	-0.5263	7971	0.6013	6322	0.727	722	0.196	2150	0.5511	2423	0.3656	3888
CCL13	0.608	1547	0.1097	1224	0.4911	3451	0.3012	3240	0.427	3756	0.3299	3515	-0.4622	7319	0.7213	7649	0.4895	2969	0.245	2655	-0.3743	6045	0.5852	6206	0.4344	3338	0.2933	3081	0.3842	4456	0.4061	4320	0.525	2688	0.2208	2374
MBD5	0.6079	1548	0.1098	1225	0.7964	551	0.0351	396	0.3662	4463	0.4028	4293	0.3839	4094	0.3668	3907	0.6172	1668	0.1133	1329	0.5441	2092	0.1557	1723	0.6621	1143	0.0681	825	-0.4426	7265	0.7139	7577	0.4068	3948	0.3511	3718
ASGR2	0.6078	1549	0.1495	1687	0.5235	3149	0.297	3191	0.7106	779	0.0718	847	0.4692	3099	0.2995	3177	0.5196	2663	0.2558	2756	0.4566	2967	0.2898	3114	0.5717	1957	0.1889	2056	0.6892	1040	0.0995	1082	0.4627	3361	0.3219	3438
FGG	0.6078	1550	0.1098	1227	-0.3264	5782	0.5552	5875	-0.5837	8679	0.8578	9047	0.2293	5212	0.4893	5180	0.4604	3282	0.2794	2992	0.7196	571	0.0293	348	-0.2712	5304	0.5057	5322	0.3793	4505	0.4096	4365	0.2726	5089	0.4699	5007
GPR176	0.6075	1551	0.1496	1690	0.6636	1683	0.1643	1770	-0.5723	8566	0.8042	8489	0.6134	1542	0.1531	1684	-0.6508	9343	0.8792	9284	0.5032	2454	0.2414	2578	0.4737	2918	0.2865	2999	0.3052	5217	0.496	5309	-0.3019	5589	0.5226	5564
MUL1	0.6075	1552	0.1496	1689	-0.5353	7731	0.7168	7623	0.4748	3199	0.3114	3303	0.668	1007	0.102	1051	0.7123	776	0.0697	831	0.8284	117	0.0096	112	0.5764	1911	0.1839	2012	-0.4214	7044	0.6546	6949	-0.3591	6068	0.5651	6020
PATE1	0.6074	1553	0.11	1230	0.3126	5009	0.464	4932	0.4885	3047	0.2572	2744	0.4468	3360	0.2897	3067	0.7018	867	0.0469	544	-0.3844	6169	0.5954	6328	0.5843	1823	0.1331	1499	-0.3489	6302	0.6032	6451	0.3146	4834	0.4428	4704
ADA	0.6074	1554	0.2173	2415	0.6316	2003	0.243	2624	0.501	2912	0.3396	3615	0.6037	1641	0.2314	2477	-0.4751	7444	0.6351	6722	0.3173	4543	0.4536	4833	-0.5701	8501	0.7223	7639	-0.2578	5669	0.5122	5468	0.5757	2121	0.273	2883
ADAM21	0.6072	1555	0.1499	1692	0.541	2967	0.2819	3026	0.8127	198	0.0172	211	-0.5408	8179	0.7644	8078	0.5167	2698	0.2583	2785	0.7211	560	0.0528	601	0.651	1224	0.1133	1286	0.6192	1779	0.1724	1889	-0.6495	9182	0.8581	9095
CEACAM6	0.6072	1556	0.2973	3204	-0.587	8234	0.6526	6950	-0.9295	10657	0.984	10465	0.6466	1195	0.2686	2853	0.9538	9	0.0064	96	0.6702	914	0.2368	2526	-0.8555	10577	0.9469	10034	-0.8163	10494	0.9113	9667	0.517	2767	0.391	4154
RNF212	0.6072	1557	0.15	1698	0.7487	880	0.0889	927	-0.6494	9410	0.8799	9294	0.4797	2984	0.2904	3081	-0.5629	8378	0.7869	8279	0.7125	607	0.058	658	0.7811	306	0.0272	336	-0.4138	6967	0.6475	6876	0.4038	3981	0.384	4083
XPA	0.607	1558	0.1102	1231	0.6217	2113	0.1723	1875	-0.4121	6797	0.6684	7039	-0.4193	6822	0.6668	7116	0.6477	1377	0.0865	1018	0.7622	333	0.0138	159	-0.4183	6708	0.658	6983	0.6671	1258	0.085	941	0.3343	4647	0.4262	4504
RAB9A	0.607	1559	0.1504	1706	-0.3782	6203	0.5851	6222	-0.6576	9504	0.8868	9375	0.7756	300	0.0295	343	-0.3419	5958	0.5576	5909	0.677	838	0.0818	920	0.4766	2887	0.2831	2974	-0.8941	10641	0.9983	10641	0.5721	2174	0.2125	2272
OR4K17	0.6069	1560	0.1103	1232	0.2984	5103	0.4726	5036	0.46	3358	0.2915	3069	0.5008	2774	0.2279	2443	0.8386	132	0.0028	53	0.7132	603	0.0313	384	0.408	3657	0.3253	3398	-0.2913	5833	0.5569	5939	-0.3765	6249	0.5983	6387
ZNF286A	0.6069	1561	0.2179	2421	-0.39	6321	0.561	5966	-0.4086	6757	0.5909	6249	-0.4536	7229	0.6159	6532	0.5197	2662	0.3148	3393	0.6926	726	0.1228	1345	0.4121	3606	0.3939	4124	0.7564	514	0.0863	956	-0.5572	8200	0.6983	7467
MTMR11	0.6069	1562	0.1105	1233	0.7213	1111	0.0855	894	0.4179	3858	0.3419	3641	0.7848	270	0.0113	136	-0.5002	7711	0.7655	8048	0.3215	4495	0.4082	4348	0.6222	1471	0.1017	1161	0.4921	3265	0.2751	2979	0.2555	5162	0.4794	5112
CLEC4A	0.6067	1563	0.1107	1235	0.8125	456	0.0286	324	0.4497	3478	0.3049	3227	-0.3511	6031	0.5845	6187	0.6158	1677	0.1144	1337	0.6137	1442	0.099	1110	-0.3387	5784	0.5606	5910	0.4668	3540	0.3061	3282	-0.2487	5326	0.5002	5330
MMP24	0.6066	1564	0.1108	1236	0.5944	2397	0.1989	2115	0.7119	769	0.0401	485	-0.6247	9148	0.9001	9513	-0.6127	8941	0.8829	9320	0.6226	1359	0.0915	1021	0.3643	4167	0.3773	3954	0.3355	4967	0.4562	4873	0.5937	1930	0.1507	1605
ADNP2	0.6066	1565	0.1507	1714	0.4656	3681	0.3484	3760	-0.4633	7384	0.6905	7274	0.4119	3776	0.363	3872	0.7167	738	0.0659	771	-0.3641	5933	0.5549	5897	-0.5553	8298	0.7758	8177	0.8396	127	0.0119	120	-0.6505	9189	0.8593	9105
ITGA8	0.6066	1566	0.1108	1238	0.5411	2963	0.2541	2736	0.4759	3183	0.2721	2890	0.4451	3376	0.2917	3098	0.2633	5137	0.4798	5075	-0.4616	7088	0.7004	7390	-0.3557	5952	0.5798	6102	-0.626	9175	0.8997	9546	0.5706	2190	0.1725	1835
SHANK2	0.6066	1567	0.1507	1712	0.5742	2592	0.2494	2691	0.702	842	0.0769	908	0.405	3851	0.3712	3953	-0.6884	9727	0.9131	9666	0.5845	1685	0.1648	1821	0.728	607	0.054	655	-0.5237	8120	0.7565	7995	0.569	2215	0.2159	2314
DDX21	0.6066	1568	0.1108	1239	0.6275	2048	0.1669	1795	0.6213	1662	0.114	1318	-0.2661	5390	0.5115	5410	0.71	792	0.0413	477	-0.4371	6794	0.6677	7051	0.5815	1855	0.1358	1533	0.743	596	0.031	349	-0.3759	6243	0.5975	6376
ARG2	0.6065	1569	0.1507	1713	-0.3222	5743	0.5414	5716	0.388	4243	0.4083	4348	0.7064	699	0.0712	768	0.6425	1428	0.1295	1497	-0.276	5204	0.4934	5238	-0.5913	8750	0.816	8614	-0.3069	5935	0.5548	5915	-0.4344	6891	0.6377	6822
TCEB3B	0.6064	1570	0.1108	1237	-0.553	7905	0.7664	8154	-0.4174	6857	0.675	7109	-0.5202	7969	0.7899	8337	0.7933	289	0.0097	131	-0.4033	6381	0.6207	6587	0.5062	2589	0.209	2256	-0.3613	6408	0.6175	6590	0.5803	2065	0.1633	1721
PHF16	0.6064	1571	0.1109	1241	-0.7854	10026	0.9596	10222	0.4116	3930	0.3515	3734	0.6921	805	0.0503	522	0.5242	2616	0.206	2286	0.4968	2520	0.2035	2208	0.7466	483	0.0203	269	0.3232	5086	0.4676	4994	0.4639	3348	0.2887	3050
CALB1	0.6063	1572	0.1111	1243	-0.4888	7278	0.7074	7515	-0.4336	7045	0.6951	7313	0.266	5111	0.4754	5030	0.5081	2791	0.2257	2464	0.5516	2013	0.1486	1652	0.5608	2041	0.153	1726	-0.5093	7976	0.7888	8333	0.496	3003	0.251	2672
GJA10	0.6062	1573	0.2186	2427	0.433	3987	0.4049	4316	-0.4414	7135	0.6183	6524	-0.5662	8497	0.722	7656	0.5957	1885	0.2448	2649	0.7512	387	0.0701	786	0.7051	775	0.1165	1317	-0.3722	6533	0.5684	6052	0.6716	1129	0.1673	1771
ZNF141	0.6061	1574	0.2186	2428	0.4879	3480	0.3628	3875	-0.6287	9199	0.7946	8359	0.9369	7	0.002	25	-0.6936	9769	0.857	9038	0.4964	2528	0.3061	3307	0.6828	971	0.1361	1537	0.4307	3962	0.4124	4404	-0.8395	10511	0.9663	10275
APOBEC3C	0.6061	1575	0.2186	2426	0.5527	2847	0.3165	3392	-0.4424	7149	0.6194	6531	0.5569	2161	0.2764	2925	0.6742	1111	0.1532	1726	0.6943	708	0.1213	1319	0.3888	3904	0.4159	4341	-0.5644	8551	0.7284	7724	-0.4656	7233	0.6226	6631
ANXA2	0.6061	1576	0.2983	3219	-0.4401	6803	0.5548	5865	0.5792	2089	0.3418	3640	-0.632	9219	0.709	7525	-0.6253	9075	0.7019	7425	0.7529	380	0.1476	1645	-0.5558	8304	0.6267	6629	0.7591	496	0.1592	1746	0.2963	4955	0.4917	5227
SMARCC1	0.6061	1577	0.1114	1245	0.4543	3793	0.3359	3624	-0.3744	6383	0.6211	6560	0.4974	2809	0.2319	2481	0.346	4549	0.4153	4402	0.5329	2189	0.1655	1830	-0.3179	5597	0.5418	5693	0.8284	160	0.006	59	-0.4179	6697	0.6437	6889
ZNF721	0.606	1578	0.2189	2433	0.555	2819	0.3145	3370	-0.5366	8191	0.6988	7347	0.7429	463	0.0843	898	0.9395	13	0.002	42	0.4753	2742	0.3269	3508	0.8764	47	0.0107	144	-0.7614	10264	0.9228	9807	-0.8093	10414	0.9476	10093
TCERG1L	0.6059	1579	0.1116	1246	0.3749	4534	0.4136	4406	0.685	1005	0.0586	695	0.509	2692	0.2176	2349	-0.4937	7634	0.7582	7973	0.5948	1588	0.1128	1245	0.3596	4222	0.3833	4017	-0.4786	7665	0.756	7992	-0.4022	6522	0.6263	6679
CHD5	0.6056	1580	0.152	1726	-0.7594	9862	0.9227	9821	0.5685	2214	0.2106	2288	-0.5109	7868	0.7318	7770	0.6279	1565	0.1428	1623	-0.5056	7568	0.7069	7445	0.5377	2245	0.2215	2380	-0.4131	6958	0.6467	6865	0.3205	4787	0.4557	4841
CD74	0.6056	1581	0.1119	1249	-0.4423	6823	0.6597	7032	0.5948	1933	0.1407	1590	0.5814	1913	0.1417	1546	0.3794	4180	0.3767	4010	0.6483	1096	0.071	804	0.4419	3254	0.2834	2976	-0.2432	5625	0.5318	5662	-0.4924	7536	0.7308	7827
RASL12	0.6056	1582	0.1119	1248	0.5268	3108	0.2673	2871	0.6556	1314	0.0825	988	-0.4668	7366	0.7258	7706	0.6578	1271	0.078	931	0.2529	4933	0.4546	4843	-0.4283	6830	0.6715	7124	0.3427	4905	0.4496	4798	0.5416	2516	0.2021	2172
FYCO1	0.6055	1583	0.1521	1728	-0.6619	8998	0.8406	8891	0.4705	3237	0.3165	3361	-0.4876	7600	0.7055	7491	-0.2813	5491	0.5198	5496	0.4569	2964	0.2896	3110	0.6808	989	0.0873	1031	0.3553	4798	0.4568	4887	0.5455	2475	0.2425	2583
FOXO1	0.6053	1584	0.2193	2435	0.4759	3585	0.3718	3977	-0.5036	7835	0.6734	7096	0.8302	138	0.0287	332	0.5804	2035	0.2606	2805	-0.3622	5906	0.5223	5568	-0.6105	8954	0.77	8114	0.638	1580	0.2137	2329	0.5006	2949	0.3393	3610
GHSR	0.6053	1585	0.1526	1731	-0.6032	8392	0.7824	8325	0.7782	332	0.0303	366	0.4794	2985	0.2904	3080	0.4712	3170	0.3044	3282	0.4878	2613	0.2556	2726	-0.3933	6373	0.5991	6299	-0.7613	10262	0.9622	10234	-0.7911	10299	0.9684	10299
COQ3	0.6051	1586	0.1528	1734	0.3193	4959	0.4707	5009	0.5968	1901	0.18	1974	-0.5192	7960	0.7406	7850	0.2824	5042	0.485	5143	-0.5261	7837	0.7334	7713	0.6216	1481	0.1393	1584	0.4973	3204	0.3082	3305	0.5137	2807	0.2737	2896
ERAP1	0.605	1587	0.2194	2438	-0.621	8559	0.7495	7977	0.4462	3522	0.3856	4119	0.8088	193	0.0387	419	0.6259	1591	0.2112	2336	-0.8243	10512	0.9684	10298	0.6548	1188	0.1673	1854	0.5409	2702	0.319	3434	-0.5988	8657	0.7429	7935
HIF1A	0.6048	1588	0.1528	1733	0.5717	2622	0.2516	2707	0.6264	1599	0.149	1657	0.424	3629	0.3496	3715	-0.2648	5412	0.5131	5425	0.5218	2294	0.2239	2397	0.4779	2868	0.2817	2959	-0.4813	7699	0.7139	7579	-0.6268	8941	0.8344	8866
DOCK5	0.6045	1589	0.153	1738	-0.6339	8694	0.8135	8632	0.4099	3962	0.3827	4081	0.491	2860	0.2799	2964	0.8292	158	0.0118	166	-0.4661	7146	0.6648	7019	0.5547	2084	0.2061	2218	-0.5877	8775	0.8206	8700	-0.4061	6572	0.6117	6508
FAM216A	0.6044	1590	0.2998	3229	0.7138	1192	0.2228	2357	-0.5724	8569	0.6571	6928	0.8366	119	0.0717	778	-0.8282	10522	0.9224	9775	-0.5749	8457	0.6416	6801	-0.4307	6860	0.54	5674	0.8048	244	0.1104	1209	0.8132	224	0.0995	1038
ABCA1	0.6043	1591	0.1129	1258	0.7717	710	0.0493	524	0.8424	130	0.003	50	0.6297	1341	0.1	1032	-0.3883	6439	0.6261	6627	-0.8228	10507	0.9968	10621	0.3582	4236	0.3851	4032	0.6437	1508	0.1063	1162	-0.8359	10499	0.9944	10597
RAB26	0.6041	1592	0.113	1259	0.8253	391	0.0244	272	0.5023	2898	0.2412	2577	0.2235	5223	0.491	5193	0.3626	4379	0.3966	4212	-0.4956	7462	0.7429	7798	0.3925	3863	0.3451	3609	0.5529	2568	0.2015	2208	0.8369	128	0.0049	42
KCNE1	0.6041	1593	0.1131	1260	0.6492	1817	0.1469	1575	0.5452	2462	0.1905	2084	0.7962	235	0.0082	105	-0.5885	8663	0.8576	9045	0.6876	759	0.0459	519	0.3994	3778	0.3368	3511	0.501	3171	0.2648	2885	0.6335	1502	0.1128	1186
CDH13	0.6038	1594	0.1131	1261	0.4071	4241	0.3843	4104	-0.2189	5390	0.5108	5389	0.7108	667	0.0392	423	-0.2573	5385	0.5098	5393	0.7103	615	0.0328	398	-0.5	7648	0.7603	8036	0.4011	4272	0.3856	4128	-0.2515	5335	0.5012	5337
MARS2	0.6037	1595	0.1134	1262	-0.5925	8284	0.8067	8561	0.4258	3768	0.331	3525	0.6328	1309	0.0966	1002	-0.2613	5399	0.5108	5406	0.4255	3344	0.2844	3051	0.3316	4496	0.4169	4355	-0.3096	5958	0.5708	6079	0.3738	4308	0.3878	4126
RIT2	0.6036	1596	0.1535	1743	-0.4807	7219	0.6685	7124	0.3649	4476	0.4328	4585	0.5398	2339	0.2282	2448	0.3786	4199	0.4062	4298	0.467	2848	0.2796	2990	0.3829	3968	0.3873	4062	-0.6089	9009	0.8432	8949	0.7711	419	0.0408	468
CEACAM1	0.6035	1597	0.1535	1742	-0.5979	8337	0.7773	8262	0.6161	1718	0.1611	1792	0.5797	1928	0.1871	2044	-0.5752	8515	0.7992	8413	0.4675	2839	0.2788	2982	0.4145	3576	0.3507	3680	0.9137	24	0.0009	17	-0.6167	8820	0.8235	8734
LGALS2	0.6035	1598	0.1135	1263	0.3881	4410	0.4012	4286	0.2362	5321	0.5019	5305	0.5969	1731	0.1281	1374	0.4517	3398	0.2897	3115	0.3076	4619	0.4203	4481	0.2799	4922	0.4587	4819	-0.477	7644	0.7543	7969	-0.4234	6771	0.6512	6973
NXF1	0.6034	1599	0.1536	1746	-0.5416	7797	0.723	7695	0.4813	3121	0.3048	3220	0.6971	770	0.077	835	-0.4973	7671	0.7155	7551	0.4114	3528	0.3397	3665	0.7849	281	0.0258	317	-0.2921	5837	0.5459	5809	-0.6509	9192	0.8596	9110
COX7C	0.6033	1600	0.1135	1264	-0.4484	6878	0.6664	7098	0.7326	606	0.03	363	0.3696	4246	0.3826	4070	-0.488	7567	0.751	7909	-0.4437	6869	0.6765	7139	0.4307	3379	0.2977	3124	0.5567	2517	0.1969	2159	0.674	1106	0.0764	824
TTF1	0.6032	1601	0.1135	1265	0.5222	3164	0.2718	2927	-0.4424	7151	0.7057	7437	0.5972	1724	0.1276	1369	0.5501	2340	0.176	1979	0.4971	2518	0.2033	2205	-0.4203	6731	0.6605	7009	-0.4595	7437	0.7352	7783	0.5144	2796	0.2322	2478
PKDREJ	0.603	1602	0.1539	1753	-0.7009	9369	0.8747	9280	0.7711	369	0.0346	424	0.5159	2620	0.2527	2703	-0.4451	7102	0.6611	6986	0.3627	4103	0.3941	4197	0.6165	1531	0.1452	1653	-0.5892	8795	0.822	8723	0.7668	438	0.0438	507
BCL2L11	0.6029	1603	0.1539	1750	-0.8879	10523	0.9881	10531	-0.3237	5910	0.5563	5880	0.5524	2201	0.216	2336	0.5804	2034	0.1926	2134	0.7003	672	0.0653	733	0.6927	873	0.0776	929	-0.782	10364	0.9735	10361	0.575	2136	0.2097	2245
MLEC	0.6028	1604	0.1539	1752	0.2848	5163	0.4913	5219	0.7391	555	0.0521	622	0.7292	540	0.0551	585	-0.5765	8532	0.8008	8427	0.8444	88	0.0073	85	-0.5688	8480	0.7905	8354	0.3249	5075	0.4832	5161	-0.3427	5908	0.5497	5859
NNMT	0.6028	1605	0.114	1268	-0.4002	6421	0.6174	6580	-0.6714	9637	0.9361	9959	0.8364	120	0.0028	31	0.7682	390	0.0161	215	-0.3408	5680	0.5468	5808	0.5204	2430	0.1949	2112	-0.2826	5784	0.5515	5877	0.3552	4467	0.4058	4300
AIPL1	0.6027	1606	0.1539	1751	0.4552	3788	0.3599	3846	0.7509	487	0.0462	552	0.7861	261	0.0258	296	0.2815	5046	0.4851	5144	-0.2658	5157	0.4889	5190	-0.497	7613	0.708	7488	-0.4422	7262	0.6745	7160	0.4393	3596	0.3468	3669
FABP2	0.6026	1607	0.2215	2457	-0.475	7172	0.6213	6641	0.7093	787	0.1195	1381	-0.4733	7448	0.6318	6716	-0.3352	5895	0.5256	5573	-0.4911	7422	0.6298	6679	0.4262	3433	0.3806	3995	0.6983	960	0.142	1552	-0.4055	6566	0.5728	6122
IL36RN	0.6025	1608	0.154	1755	0.7811	643	0.066	694	0.8049	228	0.0196	245	0.4037	3869	0.3733	3968	0.7575	443	0.042	481	0.4339	3233	0.3141	3370	0.5265	2374	0.2327	2497	0.4196	4073	0.3917	4177	-0.5836	8495	0.7887	8406
ZNF561	0.6024	1609	0.154	1757	-0.4656	7057	0.6563	6994	0.4032	4045	0.3906	4172	-0.5663	8498	0.7926	8368	0.6646	1206	0.1083	1277	0.473	2774	0.2715	2900	-0.4467	7046	0.6545	6941	-0.5084	7967	0.742	7845	0.7357	620	0.0622	695
TUBA1A	0.6023	1610	0.154	1756	-0.6317	8665	0.8114	8607	0.607	1806	0.1691	1866	-0.408	6679	0.6237	6613	0.3666	4337	0.4186	4437	-0.3342	5624	0.5254	5596	0.4052	3699	0.3613	3791	-0.6039	8969	0.8387	8896	-0.2569	5354	0.5046	5390
ETHE1	0.6021	1611	0.222	2461	0.7235	1084	0.1492	1602	-0.6743	9659	0.8413	8872	0.6867	845	0.137	1491	0.6511	1342	0.1792	2013	0.6791	823	0.1344	1486	-0.2935	5436	0.4983	5244	-0.6592	9498	0.8258	8773	0.7443	561	0.095	1002
RGS1	0.6021	1612	0.1144	1272	-0.3915	6333	0.6097	6485	-0.5595	8426	0.835	8789	0.5093	2686	0.2171	2345	0.2726	5090	0.4751	5016	-0.3386	5660	0.5445	5782	-0.2934	5435	0.5208	5483	0.7102	851	0.0505	564	-0.2247	5276	0.4944	5260
GIMAP8	0.602	1613	0.1145	1276	-0.4304	6719	0.6484	6902	0.3986	4107	0.3674	3910	0.4627	3177	0.2703	2867	0.5408	2438	0.1863	2085	0.4251	3353	0.2852	3063	0.2903	4847	0.4508	4743	-0.3392	6200	0.5942	6341	0.669	1150	0.0811	855
FDXR	0.6019	1614	0.1544	1767	-0.6713	9083	0.8504	8993	-0.5816	8657	0.8127	8575	0.5836	1886	0.183	2011	0.5389	2461	0.2352	2555	0.5236	2279	0.2223	2376	0.7912	256	0.0238	295	-0.3885	6683	0.6236	6658	0.518	2758	0.2689	2832
CAPN12	0.6018	1615	0.1544	1764	-0.5261	7644	0.709	7532	0.3239	4859	0.4672	4943	-0.38	6341	0.5946	6304	0.5279	2573	0.2464	2664	0.329	4422	0.426	4547	-0.7399	10117	0.9524	10113	-0.4933	7816	0.7261	7694	0.6578	1271	0.1255	1331
POU2F3	0.6018	1616	0.1544	1765	0.6049	2277	0.2216	2338	0.4313	3707	0.3584	3803	-0.3393	5921	0.5552	5883	-0.6637	9478	0.8911	9401	0.3811	3905	0.3725	4002	-0.5633	8400	0.7842	8281	0.7745	406	0.0384	426	0.7514	517	0.0529	597
CENPE	0.6018	1617	0.1146	1279	0.9282	72	0.0022	39	0.3999	4089	0.366	3893	-0.4593	7280	0.7186	7617	0.6533	1320	0.0807	971	0.6007	1542	0.1083	1203	0.4885	2766	0.2305	2470	0.3597	4757	0.4331	4617	-0.4963	7571	0.7353	7867
HSPA2	0.6018	1618	0.1146	1278	0.4275	4044	0.3632	3882	0.738	569	0.0279	329	-0.3703	6240	0.6031	6405	-0.8028	10437	0.9937	10569	0.5009	2475	0.1988	2159	-0.368	6077	0.5935	6230	0.577	2270	0.173	1901	-0.5274	7871	0.7696	8197
ATP1A2	0.6016	1619	0.1546	1768	0.359	4673	0.4433	4728	0.2728	5194	0.5011	5293	0.4323	3536	0.3413	3626	0.5174	2691	0.2576	2778	0.7779	247	0.0259	303	0.4524	3130	0.3077	3211	-0.526	8144	0.7581	8021	0.6035	1819	0.1813	1960
SSR1	0.6013	1620	0.1147	1280	0.2797	5187	0.4825	5133	-0.4262	6956	0.6846	7219	0.5273	2482	0.1958	2133	0.4431	3504	0.3007	3244	0.4692	2818	0.2356	2512	0.7198	672	0.0331	413	0.2302	5540	0.5192	5538	-0.5841	8500	0.8314	8818
FXYD4	0.6011	1621	0.1149	1282	-0.4846	7247	0.7034	7477	0.6034	1843	0.1309	1494	-0.499	7729	0.7666	8096	0.5951	1894	0.1335	1540	0.4541	2993	0.2509	2675	-0.479	7407	0.7333	7755	-0.3123	5979	0.5724	6096	-0.4544	7123	0.6886	7372
ACPP	0.6011	1622	0.1551	1770	0.7834	631	0.0646	681	-0.4577	7319	0.6845	7218	0.4759	3032	0.2933	3112	0.3865	4124	0.399	4235	0.6301	1277	0.1238	1355	0.252	5039	0.4854	5104	0.5655	2400	0.2331	2539	0.5721	2173	0.2125	2271
VIM	0.601	1623	0.1149	1283	0.7819	638	0.0422	466	-0.4245	6941	0.6825	7199	0.5238	2530	0.1996	2176	0.4852	3013	0.2493	2696	0.4669	2852	0.2376	2540	0.6233	1461	0.1006	1154	-0.6408	9310	0.9131	9687	0.1933	5251	0.491	5219
TUBB2A	0.601	1624	0.1149	1285	-0.4018	6441	0.6188	6601	0.505	2864	0.2388	2543	0.6584	1094	0.0735	801	0.4177	3794	0.3308	3585	0.2714	4856	0.4463	4753	0.4101	3624	0.3232	3374	0.5167	2999	0.2464	2673	-0.2304	5285	0.4957	5278
XAGE3	0.601	1625	0.1553	1776	0.7021	1309	0.1261	1365	0.7285	634	0.0593	702	0.5484	2243	0.22	2374	-0.4749	7442	0.6912	7312	0.4351	3212	0.3129	3354	0.6516	1214	0.113	1279	0.6328	1635	0.1575	1725	-0.4539	7115	0.6566	7026
PLCH1	0.6008	1626	0.1553	1775	-0.2624	5427	0.5163	5442	0.5634	2272	0.2178	2350	0.7587	376	0.0392	424	-0.637	9209	0.865	9155	-0.5669	8349	0.7828	8228	0.4697	2968	0.2905	3048	0.6836	1098	0.1063	1161	-0.4696	7277	0.6711	7180
PLS3	0.6007	1627	0.1151	1287	-0.247	5381	0.512	5390	0.4671	3271	0.2832	2986	0.3735	4210	0.378	4023	0.4348	3607	0.3115	3363	0.6808	811	0.0503	560	0.7301	591	0.0281	352	0.2999	5257	0.4863	5203	-0.3703	6179	0.5906	6309
AURKB	0.6007	1628	0.2236	2475	0.5311	3062	0.3327	3587	0.7063	809	0.1222	1408	0.8408	103	0.0245	278	-0.8139	10473	0.9623	10230	-0.2614	5141	0.4795	5102	0.7286	602	0.0955	1110	-0.4243	7072	0.6064	6476	0.8423	118	0.0282	339
ECT2	0.6007	1629	0.1554	1778	-0.3769	6188	0.5838	6212	0.9009	38	0.0016	34	0.6283	1355	0.1371	1492	0.3912	4065	0.3935	4183	0.5863	1660	0.1627	1802	-0.342	5813	0.548	5760	-0.6889	9760	0.9143	9706	-0.8047	10383	0.9738	10361
USP47	0.6005	1630	0.1155	1292	0.4925	3435	0.2994	3215	-0.2807	5590	0.5367	5664	0.4392	3447	0.2986	3169	0.3426	4579	0.419	4445	0.6192	1395	0.0942	1061	0.5112	2520	0.2033	2193	-0.564	8543	0.8409	8927	0.568	2223	0.1749	1867
TRIM56	0.6004	1631	0.1156	1293	0.2722	5220	0.4865	5175	-0.234	5408	0.514	5412	0.6257	1398	0.1032	1069	-0.3623	6169	0.5945	6304	0.5422	2113	0.1575	1748	0.6342	1374	0.091	1062	0.6596	1332	0.0916	1009	-0.5634	8273	0.8104	8593
CD59	0.6	1632	0.116	1297	0.247	5291	0.4971	5278	0.3115	4960	0.4596	4863	0.5519	2205	0.1695	1845	0.5365	2484	0.1915	2128	0.5401	2132	0.1596	1768	0.5792	1880	0.1374	1558	0.4624	3600	0.3119	3358	-0.3525	6005	0.5724	6113
PIK3R1	0.5997	1633	0.0221	259	0.8452	299	0.0028	45	0.2491	5291	0.4682	4961	0.3221	4716	0.3408	3615	-0.5298	8033	0.9258	9823	0.354	4186	0.2487	2651	0.6402	1316	0.0121	163	0.5581	2500	0.0649	724	0.3228	4763	0.3515	3726
TANK	0.5997	1634	0.1567	1786	-0.7486	9776	0.9144	9724	0.54	2506	0.2454	2613	0.3278	4658	0.4504	4741	0.7089	801	0.0719	854	0.6502	1075	0.1051	1175	0.2882	4866	0.4707	4945	0.5066	3106	0.2975	3207	-0.8055	10384	0.9743	10369
PIAS3	0.5996	1635	0.1161	1298	0.5705	2638	0.2229	2359	0.6404	1462	0.0971	1131	0.4889	2881	0.2398	2570	0.6283	1560	0.1039	1215	-0.3751	6051	0.586	6213	0.6633	1135	0.0672	817	0.425	4025	0.3578	3866	0.521	2726	0.2252	2406
PTBP3	0.5995	1636	0.1162	1300	0.8644	224	0.012	144	0.6	1874	0.1355	1530	0.2959	4935	0.4558	4832	-0.446	7113	0.6982	7388	0.5709	1822	0.1336	1475	0.5817	1853	0.1355	1528	0.6574	1352	0.0936	1026	0.7308	650	0.0369	430
SIAH1	0.5995	1637	0.1162	1301	0.3848	4447	0.4042	4313	0.6339	1541	0.1024	1184	0.5883	1836	0.1347	1464	0.7708	369	0.0154	206	-0.2753	5202	0.49	5200	-0.4102	6590	0.6457	6839	0.4768	3447	0.2941	3178	0.452	3464	0.3003	3188
CASK	0.5995	1638	0.1162	1303	0.7095	1231	0.0953	1005	0.8056	225	0.0074	105	-0.2726	5426	0.5152	5455	-0.774	10318	0.9853	10498	0.5825	1710	0.1236	1352	0.4399	3272	0.2859	2992	-0.8184	10503	0.9957	10609	0.7869	346	0.0146	182
ITPR1	0.5995	1639	0.1162	1302	0.3552	4705	0.4306	4591	0.8907	50	0.0004	9	0.262	5132	0.4769	5050	0.6512	1341	0.0829	990	0.3836	3873	0.3366	3624	0.3929	3856	0.3446	3603	-0.7249	10023	0.9666	10271	-0.5687	8329	0.8152	8653
TEAD4	0.5992	1640	0.1163	1304	-0.6907	9271	0.8986	9532	0.8104	209	0.0067	91	0.3019	4884	0.4529	4780	0.3788	4194	0.3772	4021	0.467	2849	0.2375	2537	0.712	741	0.0374	473	-0.5333	8220	0.8104	8568	-0.5282	7880	0.7708	8209
ESR1	0.5992	1641	0.1572	1796	0.4579	3758	0.3577	3827	0.3131	4952	0.4745	5031	-0.3407	5933	0.5569	5896	0.4206	3767	0.3583	3845	0.6299	1280	0.124	1358	0.6138	1556	0.1471	1675	0.5612	2455	0.2379	2584	-0.6599	9293	0.8676	9207
TAF6	0.5987	1642	0.1167	1309	0.7251	1071	0.083	860	0.5306	2612	0.2077	2264	0.5255	2507	0.1983	2158	-0.5256	7996	0.7931	8345	-0.3975	6309	0.6132	6511	0.568	1981	0.1466	1668	-0.3126	5985	0.5729	6104	0.5003	2951	0.2463	2619
TTC3	0.5987	1643	0.2252	2497	0.5755	2580	0.2963	3184	-0.4719	7467	0.6449	6794	-0.461	7302	0.6218	6594	-0.5021	7739	0.6571	6948	0.6433	1145	0.1702	1882	-0.6078	8927	0.7664	8088	-0.4166	7000	0.6006	6421	0.7867	348	0.0621	693
ZNF438	0.5987	1644	0.1167	1310	-0.8533	10414	0.9861	10513	-0.5137	7956	0.788	8302	0.7812	279	0.0121	141	0.3014	4911	0.4564	4831	0.3855	3844	0.3336	3588	0.6984	826	0.0448	543	-0.6505	9413	0.92	9770	0.3309	4686	0.4297	4552
TROAP	0.5985	1645	0.1167	1308	-0.3598	6045	0.58	6175	-0.7565	10233	0.9792	10416	0.5761	1956	0.1471	1608	-0.5948	8739	0.8641	9142	0.4983	2500	0.2026	2193	0.7137	730	0.0362	456	-0.571	8613	0.8484	8993	0.6871	994	0.0661	721
SYT4	0.5985	1646	0.1579	1806	0.8324	352	0.035	392	-0.6899	9788	0.9151	9723	0.523	2540	0.2446	2627	0.8891	41	0.0026	50	0.5843	1689	0.165	1827	0.6877	925	0.0818	974	0.5991	2005	0.1948	2136	-0.598	8653	0.8029	8539
ASAP2	0.5983	1647	0.1581	1810	0.4337	3976	0.378	4045	0.8366	142	0.0102	135	0.5852	1868	0.1821	1993	-0.3896	6452	0.6047	6418	0.4635	2894	0.2834	3036	-0.5304	8014	0.7472	7900	0.6714	1211	0.1171	1284	-0.6611	9310	0.8684	9215
SDHB	0.5982	1648	0.117	1312	0.2987	5099	0.4723	5023	0.7097	784	0.0419	505	0.5591	2137	0.163	1785	-0.4709	7399	0.7295	7713	0.3311	4399	0.3997	4249	0.7248	629	0.0307	383	-0.5683	8592	0.8451	8966	-0.2461	5318	0.4996	5321
PTPN12	0.5982	1649	0.117	1314	-0.6332	8685	0.8495	8984	0.3728	4400	0.3959	4229	0.6049	1626	0.1205	1277	-0.4491	7152	0.7021	7429	-0.397	6300	0.6125	6506	-0.351	5897	0.5743	6043	0.5959	2046	0.1552	1686	-0.4155	6672	0.6412	6856
IFNE	0.598	1650	0.1171	1316	-0.5075	7472	0.7246	7713	0.4957	2970	0.2479	2648	0.4287	3577	0.312	3309	0.4737	3140	0.264	2851	0.6634	961	0.0609	692	-0.5447	8184	0.8102	8550	0.5225	2931	0.2391	2597	-0.3332	5831	0.5554	5938
ADAMTS8	0.598	1651	0.1584	1812	0.7064	1267	0.1223	1322	-0.4808	7577	0.7084	7465	0.7213	598	0.0598	637	0.3936	4038	0.391	4163	0.4191	3440	0.3324	3574	0.3946	3833	0.3749	3930	-0.6963	9813	0.919	9757	0.6583	1264	0.1246	1321
ARFRP1	0.5977	1652	0.1589	1818	0.5796	2538	0.2453	2650	0.5663	2241	0.2138	2318	0.4766	3022	0.2931	3109	0.6147	1689	0.1579	1773	0.4659	2863	0.2812	3006	-0.7074	9905	0.9309	9868	0.5562	2524	0.2446	2655	-0.4184	6705	0.6226	6635
PTGES3	0.5977	1653	0.1175	1318	0.3622	4647	0.424	4535	0.3209	4887	0.4506	4774	0.5165	2613	0.2078	2258	0.5945	1899	0.134	1550	0.5915	1616	0.1161	1278	0.3874	3922	0.3503	3673	-0.5173	8050	0.7954	8411	-0.5229	7825	0.7645	8145
SCN4B	0.5976	1654	0.1175	1319	-0.6078	8443	0.8225	8723	-0.25	5442	0.5191	5463	0.3743	4205	0.3771	4019	0.351	4500	0.4095	4342	0.398	3687	0.3186	3414	0.7194	677	0.0332	415	-0.525	8133	0.8034	8483	-0.2775	5441	0.514	5482
CFP	0.5974	1655	0.1179	1321	0.2562	5268	0.4941	5248	0.7351	586	0.0292	346	0.402	3891	0.3453	3671	0.6433	1420	0.0913	1062	-0.5216	7786	0.7773	8151	-0.5793	8602	0.8491	8988	0.7112	841	0.0498	555	-0.2421	5305	0.4985	5311
GPR114	0.5973	1656	0.1179	1322	0.3667	4604	0.4202	4485	0.7603	427	0.0183	230	0.3696	4244	0.3826	4069	0.6695	1161	0.07	834	0.702	658	0.0376	438	0.765	382	0.0152	204	0.4868	3327	0.2824	3055	-0.5666	8312	0.8137	8633
HAT1	0.5972	1657	0.1596	1822	0.3675	4600	0.4363	4653	-0.3651	6289	0.5943	6285	0.436	3484	0.3383	3587	0.6421	1432	0.1298	1500	-0.378	6077	0.5702	6034	0.6701	1077	0.0968	1118	0.4147	4128	0.3968	4227	-0.6319	8996	0.8401	8921
ZNF124	0.5972	1658	0.1179	1324	0.9017	124	0.0051	74	-0.4697	7448	0.7394	7795	0.4212	3660	0.3207	3406	0.6975	915	0.0491	577	0.4123	3520	0.2998	3235	0.6638	1128	0.0668	813	-0.7508	10193	0.977	10409	0.1949	5250	0.491	5220
QPCT	0.5972	1659	0.1599	1827	0.647	1840	0.1788	1925	0.6196	1681	0.158	1762	0.6304	1333	0.1354	1475	0.3981	3984	0.3857	4107	-0.3521	5797	0.5423	5767	0.3639	4170	0.4075	4245	-0.4345	7177	0.6672	7096	0.2707	5099	0.4848	5158
MAPK6	0.5972	1660	0.1599	1828	-0.6909	9272	0.8659	9172	-0.3671	6305	0.5956	6300	0.2874	4987	0.4796	5076	0.4168	3806	0.363	3886	0.2606	4902	0.4684	4993	0.5929	1750	0.1681	1857	0.6254	1708	0.1651	1816	0.7492	530	0.0544	606
RAMP3	0.5971	1661	0.1179	1323	0.2368	5304	0.4994	5291	0.3359	4772	0.4366	4642	-0.3393	5920	0.5709	6043	0.6137	1694	0.1163	1355	0.533	2188	0.1654	1829	0.3206	4598	0.4277	4484	0.4843	3355	0.2857	3081	-0.5439	8049	0.7877	8394
RPL6	0.5971	1662	0.1601	1832	-0.3073	5648	0.5329	5636	-0.4275	6968	0.6538	6890	0.7636	355	0.0356	399	0.8391	128	0.0101	144	0.5937	1596	0.1551	1716	0.9036	23	0.0015	37	0.5447	2659	0.2565	2790	-0.4537	7112	0.6566	7027
RBM25	0.597	1663	0.118	1325	0.6246	2081	0.1696	1831	0.7513	485	0.0218	269	0.4809	2971	0.2482	2666	0.5026	2838	0.2325	2525	-0.407	6437	0.6263	6657	0.6517	1213	0.0755	901	0.8343	143	0.0048	46	-0.2398	5298	0.4981	5309
WNT3	0.5969	1664	0.1182	1330	0.5084	3290	0.2845	3064	0.7663	392	0.016	203	0.3959	3960	0.352	3741	0.4191	3777	0.329	3561	0.4576	2956	0.2479	2641	0.4019	3746	0.3343	3479	0.7914	308	0.013	136	-0.3103	5649	0.5369	5730
CRNN	0.5969	1665	0.1182	1329	-0.7659	9917	0.9488	10105	-0.3933	6578	0.6454	6804	-0.2988	5600	0.5349	5666	0.6436	1416	0.0909	1061	0.7866	222	0.0085	98	0.3844	3953	0.3545	3705	-0.6177	9100	0.8927	9476	-0.4963	7572	0.7353	7869
RHBDD2	0.5967	1666	0.1604	1838	-0.5986	8346	0.7776	8266	0.6755	1099	0.1009	1169	0.825	147	0.0124	144	0.6461	1396	0.1265	1469	0.4748	2748	0.2696	2877	-0.4244	6774	0.6303	6667	-0.4758	7632	0.7087	7527	0.5425	2510	0.2455	2612
RPS27A	0.5967	1667	0.3063	3289	-0.552	7897	0.6222	6645	0.5135	2776	0.3962	4232	0.3789	4148	0.463	4902	0.6643	1211	0.2538	2739	0.9715	2	0.0019	26	0.8034	210	0.1009	1157	-0.7974	10430	0.8944	9492	-0.3609	6085	0.5171	5521
UBAC2	0.5967	1668	0.1182	1328	-0.3375	5879	0.5635	5993	-0.5889	8730	0.8623	9104	0.6521	1143	0.0789	850	-0.2871	5528	0.5281	5599	-0.4207	6600	0.6451	6821	0.5749	1926	0.1411	1600	-0.4448	7286	0.7165	7602	0.3409	4591	0.4209	4447
CLDN10	0.5966	1669	0.1606	1839	-0.3333	5842	0.5489	5797	0.5411	2496	0.2442	2598	0.3123	4793	0.4617	4879	0.5163	2703	0.2586	2790	0.6012	1537	0.1486	1655	-0.4882	7512	0.6977	7389	0.3586	4768	0.454	4856	-0.4433	6972	0.645	6903
UBE2D2	0.5964	1670	0.1183	1331	0.6196	2129	0.175	1893	-0.572	8564	0.8467	8918	0.6558	1115	0.0758	822	0.6345	1499	0.0998	1149	-0.4419	6848	0.6741	7118	0.8227	154	0.0039	66	-0.5622	8523	0.8391	8905	-0.8208	10448	0.9921	10562
OR4D1	0.5963	1671	0.1185	1333	0.3578	4681	0.4284	4569	-0.3266	5936	0.5718	6042	0.7097	676	0.0395	427	-0.4666	7355	0.7256	7666	0.7546	363	0.0155	180	0.3084	4701	0.4376	4598	-0.5105	7986	0.7899	8341	0.3055	4894	0.4502	4774
ARHGAP32	0.5963	1672	0.1609	1841	0.6586	1723	0.169	1823	-0.5228	8053	0.7525	7922	-0.5419	8191	0.7657	8087	0.4749	3127	0.3	3233	0.4522	3018	0.2945	3170	-0.4259	6791	0.6321	6689	-0.3263	6098	0.5707	6076	0.5299	2633	0.259	2730
FPR2	0.596	1673	0.1188	1334	0.3017	5083	0.4707	5007	-0.252	5448	0.5201	5476	0.411	3788	0.333	3537	0.6106	1738	0.1197	1391	0.6397	1178	0.0776	880	-0.3948	6396	0.6266	6625	-0.5644	8550	0.8411	8930	-0.3697	6170	0.5901	6303
NELL2	0.596	1674	0.119	1338	-0.6008	8364	0.8149	8652	0.7807	316	0.0132	166	-0.3404	5930	0.5723	6060	0.4771	3108	0.2594	2796	0.7037	646	0.0363	431	-0.3816	6234	0.6094	6420	0.6971	974	0.0596	665	0.3354	4642	0.4249	4501
KCNJ1	0.5959	1675	0.2279	2509	-0.6169	8523	0.7454	7936	-0.3715	6354	0.5614	5936	-0.708	9915	0.8786	9308	0.7559	448	0.0756	889	-0.5505	8143	0.6914	7304	0.376	4051	0.4269	4469	-0.5757	8657	0.7389	7807	0.6458	1383	0.1966	2120
LOC729020	0.5959	1676	0.1611	1842	0.6666	1650	0.1619	1749	0.4575	3389	0.3314	3533	0.654	1129	0.1139	1210	0.6255	1594	0.1454	1654	0.7008	667	0.065	731	0.4902	2752	0.2684	2821	0.3154	5154	0.489	5238	-0.4454	7005	0.6466	6928
UBE2T	0.5958	1677	0.1192	1340	0.4157	4162	0.3746	4011	0.3077	4984	0.4621	4886	0.5898	1817	0.1336	1445	0.4807	3069	0.2554	2750	-0.6031	8783	0.8686	9179	0.6926	876	0.0487	587	0.6428	1523	0.107	1167	0.6011	1856	0.1433	1530
SPATA8	0.5957	1678	0.1193	1342	-0.5095	7499	0.7271	7741	0.3092	4978	0.4611	4877	0.3877	4051	0.3614	3861	0.3521	4490	0.4082	4328	0.5797	1746	0.126	1386	0.6389	1328	0.0865	1021	-0.3033	5908	0.5652	6025	0.6086	1757	0.136	1446
DLL3	0.5955	1679	0.12	1346	0.2926	5129	0.4751	5062	0.5205	2714	0.219	2362	0.2996	4902	0.4542	4804	-0.2764	5465	0.5208	5507	0.6432	1146	0.0745	845	0.326	4551	0.4219	4421	0.5299	2851	0.2297	2503	0.2939	4972	0.4576	4859
SLC23A2	0.5954	1680	0.1614	1843	0.2883	5148	0.4899	5200	0.392	4188	0.4034	4301	0.6033	1648	0.1651	1807	-0.5464	8203	0.77	8100	0.3799	3921	0.3736	4015	0.3497	4320	0.4216	4417	0.4594	3628	0.3478	3748	-0.7731	10196	0.9561	10176
TMED1	0.5953	1681	0.1204	1349	-0.3387	5886	0.5647	6004	0.7278	642	0.0328	395	0.4493	3326	0.2859	3026	0.435	3603	0.3112	3360	0.6446	1128	0.0737	836	-0.2642	5266	0.5015	5278	0.5919	2092	0.1579	1730	-0.5078	7679	0.7483	7996
SOAT1	0.5952	1682	0.1207	1350	0.6864	1461	0.114	1223	-0.3576	6221	0.6022	6368	0.3751	4195	0.3762	4009	0.4234	3747	0.324	3517	-0.361	5894	0.569	6024	-0.2643	5267	0.5017	5279	-0.5721	8622	0.8495	9000	0.6506	1341	0.0973	1016
ZFP106	0.5952	1683	0.1207	1351	-0.5853	8217	0.7996	8493	0.375	4378	0.3932	4200	0.3579	4388	0.3965	4222	0.7159	743	0.0385	439	0.4967	2521	0.2036	2210	-0.3782	6200	0.6049	6368	-0.4275	7101	0.6953	7383	0.6097	1742	0.1354	1436
HNRNPA2B1	0.5951	1684	0.1618	1852	-0.3306	5816	0.5472	5773	-0.613	8993	0.8461	8915	0.5894	1822	0.1784	1947	0.7029	854	0.0759	892	-0.363	5920	0.5535	5877	-0.4286	6833	0.6357	6728	0.3398	4933	0.4695	5017	0.3942	4096	0.3925	4169
SLC5A5	0.5951	1685	0.162	1859	-0.8059	10150	0.9552	10175	-0.3852	6489	0.6119	6457	0.4626	3180	0.3069	3256	-0.4471	7125	0.6626	7003	-0.561	8279	0.7763	8137	0.6395	1322	0.124	1395	0.6167	1804	0.1751	1930	0.7479	538	0.0549	615
ABCG4	0.595	1686	0.1622	1866	0.4704	3641	0.3438	3705	0.5073	2838	0.279	2953	0.5566	2163	0.2114	2291	-0.4496	7160	0.6651	7027	0.5063	2434	0.2388	2552	0.6936	864	0.0766	918	0.356	4790	0.4564	4879	0.358	4440	0.429	4542
MAN1A2	0.595	1687	0.1209	1352	0.7272	1055	0.0808	844	0.6717	1151	0.0682	805	0.4193	3686	0.3226	3429	0.3151	4810	0.4459	4721	0.6745	866	0.0534	610	0.5968	1716	0.1225	1373	-0.4564	7413	0.7318	7758	-0.282	5464	0.5167	5515
ZNF358	0.5949	1688	0.1209	1353	-0.2931	5570	0.5332	5639	-0.51	7913	0.7846	8266	0.6015	1670	0.1235	1317	-0.4067	6652	0.6506	6886	-0.299	5342	0.5061	5374	0.7363	543	0.025	309	-0.5063	7942	0.7857	8303	-0.3922	6417	0.615	6549
ZNF519	0.5947	1689	0.2297	2524	-0.8131	10207	0.9301	9890	-0.4494	7227	0.6261	6613	-0.4107	6706	0.5803	6145	-0.6119	8931	0.7728	8138	0.6082	1488	0.2097	2266	0.5675	1987	0.2603	2747	-0.58	8690	0.7432	7856	0.4541	3442	0.3747	3979
OR1S2	0.5945	1690	0.1624	1868	0.7559	820	0.0847	880	0.3975	4121	0.3971	4241	0.6769	938	0.0935	975	-0.4493	7154	0.6647	7021	0.5857	1667	0.1634	1807	-0.3655	6048	0.5723	6027	-0.7022	9859	0.9242	9819	0.5685	2220	0.2166	2320
SENP7	0.5945	1691	0.1214	1359	-0.5299	7678	0.7439	7916	-0.5127	7946	0.787	8292	0.5747	1971	0.1481	1621	0.6278	1566	0.1046	1225	0.4898	2592	0.2116	2275	0.5433	2191	0.1695	1874	-0.5852	8743	0.861	9132	0.6534	1318	0.0944	993
P4HA3	0.5944	1692	0.1214	1358	-0.5109	7513	0.7281	7757	0.3569	4555	0.4138	4390	0.7544	392	0.0182	216	-0.3856	6402	0.6222	6584	-0.6034	8786	0.8688	9183	0.5363	2261	0.1781	1955	0.6225	1740	0.129	1402	-0.4453	7004	0.6776	7257
GJC3	0.5943	1693	0.1626	1870	0.3209	4946	0.4699	4991	-0.5914	8760	0.8244	8700	0.6113	1561	0.1556	1701	0.5407	2439	0.2334	2530	0.6945	706	0.0692	775	-0.4052	6528	0.6111	6443	0.4748	3467	0.3314	3560	0.5152	2786	0.2722	2870
SLC19A3	0.594	1694	0.1216	1361	-0.4522	6920	0.6699	7135	-0.3954	6604	0.6481	6834	-0.3195	5749	0.5525	5851	0.4579	3312	0.2823	3024	0.3794	3927	0.3421	3686	0.6318	1398	0.0928	1086	-0.6044	8974	0.8812	9350	0.3218	4774	0.437	4643
LPPR1	0.594	1695	0.1216	1360	-0.5766	8129	0.7908	8412	0.5536	2370	0.181	1987	-0.3934	6520	0.6331	6734	0.5895	1942	0.1402	1597	0.6941	711	0.0419	476	0.6381	1334	0.0876	1032	-0.4348	7182	0.7035	7478	0.7049	841	0.0515	581
IGSF6	0.5939	1696	0.1629	1876	0.7125	1205	0.1179	1279	0.3386	4746	0.4556	4827	0.534	2396	0.2347	2508	-0.4502	7169	0.6657	7039	0.6972	691	0.0678	760	0.6293	1420	0.1321	1488	-0.2895	5825	0.5446	5795	-0.6318	8994	0.84	8918
MLL	0.5938	1697	0.1629	1873	0.5309	3067	0.2911	3122	0.7279	639	0.0601	711	0.6925	800	0.0796	859	-0.3937	6504	0.6088	6446	0.5149	2358	0.2303	2458	0.212	5120	0.492	5171	0.8317	151	0.0137	139	0.4646	3342	0.3203	3424
TRIM9	0.5937	1698	0.1219	1367	0.3795	4488	0.4096	4358	0.3875	4250	0.3801	4040	0.456	3260	0.2774	2939	-0.3934	6500	0.6332	6697	0.6494	1080	0.0705	790	-0.2372	5176	0.4912	5162	-0.3286	6114	0.5859	6249	0.6344	1492	0.1122	1181
H2BFM	0.5936	1699	0.1219	1365	-0.7133	9479	0.9147	9731	0.5978	1892	0.1374	1550	-0.6146	9037	0.889	9396	-0.5433	8164	0.8103	8527	0.5411	2124	0.1588	1763	0.4643	3018	0.2579	2726	0.2086	5573	0.5227	5577	0.5288	2640	0.2162	2318
KCNA4	0.5935	1700	0.1632	1877	-0.2797	5498	0.5216	5495	0.4304	3717	0.3591	3818	-0.3701	6238	0.5855	6198	0.6232	1624	0.1479	1676	0.2643	4885	0.4672	4976	0.6865	939	0.0824	980	-0.5931	8839	0.8259	8774	0.4137	3876	0.3709	3936
BOK	0.5935	1701	0.1222	1369	0.3443	4792	0.4393	4684	-0.3463	6109	0.5903	6240	0.7143	650	0.0375	409	0.5428	2418	0.1847	2062	-0.4996	7503	0.748	7842	0.6501	1230	0.0762	911	-0.6559	9463	0.9242	9818	-0.3871	6363	0.6094	6484
EIF4A2	0.5935	1702	0.1633	1880	0.6904	1425	0.1377	1483	0.5615	2288	0.2197	2371	0.3967	3945	0.3827	4073	-0.5447	8181	0.7677	8068	-0.4411	6840	0.6373	6750	0.6032	1651	0.1566	1757	0.6849	1085	0.1047	1136	-0.4725	7315	0.6738	7210
SIGLEC8	0.5935	1703	0.2308	2533	0.5728	2606	0.2991	3211	-0.3464	6110	0.5416	5729	-0.4926	7657	0.648	6903	0.6233	1623	0.2145	2358	0.8164	146	0.0321	390	0.7063	769	0.1157	1308	-0.8879	10636	0.9902	10554	0.6486	1367	0.1948	2106
FEV	0.5933	1704	0.1225	1373	0.7598	792	0.0555	592	0.575	2147	0.1592	1770	0.7279	548	0.0302	349	0.763	413	0.0171	224	0.4992	2492	0.2015	2177	-0.48	7421	0.7343	7769	-0.3607	6399	0.6167	6579	0.5733	2161	0.1695	1802
MANEA	0.5933	1705	0.1633	1882	-0.6911	9280	0.8661	9178	0.753	474	0.0448	537	0.6175	1485	0.1493	1631	0.5594	2245	0.2149	2362	-0.4858	7365	0.6856	7231	0.3922	3869	0.3776	3961	0.6007	1983	0.1932	2114	-0.4215	6740	0.6259	6670
KISS1R	0.5933	1706	0.1633	1883	0.7852	618	0.0634	668	-0.2513	5446	0.5194	5469	-0.6998	9843	0.9243	9788	0.686	1006	0.0886	1041	0.5575	1953	0.1906	2074	-0.5776	8583	0.8	8433	0.4038	4249	0.4092	4362	0.7374	610	0.0614	686
ITGB3BP	0.5933	1707	0.1228	1374	0.4857	3507	0.3061	3284	0.4084	3981	0.3561	3779	0.5531	2192	0.1678	1831	0.5432	2409	0.1842	2058	0.6395	1179	0.0777	884	0.3454	4359	0.4012	4182	-0.4797	7679	0.7571	8002	0.6106	1729	0.1347	1425
SRGN	0.5932	1708	0.231	2534	0.454	3795	0.3887	4149	0.8474	119	0.0222	274	0.4816	2964	0.3401	3609	-0.593	8720	0.7497	7896	-0.6109	8872	0.7637	7998	0.5659	2002	0.2619	2762	-0.5112	7993	0.6809	7227	-0.3984	6480	0.5679	6059
TMEM171	0.593	1709	0.2313	2536	-0.5692	8055	0.6982	7422	0.6963	904	0.1323	1502	0.364	4318	0.4409	4663	-0.749	10183	0.9129	9665	0.6679	929	0.1455	1620	0.5471	2158	0.277	2902	-0.4428	7267	0.6227	6653	0.7011	866	0.1354	1434
YKT6	0.593	1710	0.123	1375	0.6033	2293	0.1909	2044	0.5328	2587	0.2048	2229	-0.5169	7935	0.7863	8296	0.567	2181	0.1602	1801	-0.2491	5100	0.4779	5077	0.6356	1361	0.0897	1054	0.3782	4521	0.4105	4383	0.5772	2097	0.1654	1747
PICK1	0.5929	1711	0.1636	1891	0.7429	932	0.0928	973	0.6352	1522	0.1395	1578	0.7617	363	0.0374	408	0.337	4648	0.4462	4724	-0.6944	9757	0.9179	9709	0.6562	1180	0.1086	1227	0.4448	3783	0.3612	3896	0.5479	2452	0.2398	2560
KRT8	0.5927	1712	0.2317	2540	0.2643	5241	0.4951	5254	-0.5234	8059	0.6885	7252	0.5726	2002	0.263	2796	0.5278	2575	0.3077	3329	0.4466	3080	0.3508	3769	0.7427	505	0.0814	967	-0.3242	6082	0.5349	5697	-0.6436	9117	0.7906	8433
ATP5J2	0.5926	1713	0.3102	3325	0.5467	2909	0.3756	4030	0.6727	1136	0.2482	2654	0.7733	312	0.1325	1431	0.48	3081	0.407	4314	-0.739	10097	0.8316	8768	0.5242	2399	0.3642	3823	0.8899	54	0.0388	429	-0.651	9196	0.7252	7753
GABRA1	0.5925	1714	0.1638	1894	0.5805	2526	0.2446	2637	-0.3932	6577	0.6196	6535	0.6922	803	0.0799	862	-0.2724	5447	0.5162	5461	-0.4718	7218	0.6706	7081	0.286	4881	0.4721	4961	0.3677	4662	0.4465	4758	0.4494	3499	0.3363	3593
CTCF	0.5923	1715	0.1236	1377	0.4325	3995	0.3577	3828	0.4085	3978	0.356	3774	0.6926	798	0.0497	518	-0.2237	5297	0.5006	5292	0.5689	1841	0.1348	1493	0.6829	969	0.0542	660	-0.6668	9575	0.9333	9911	-0.4925	7537	0.7308	7826
HP	0.5922	1716	0.3103	3326	-0.3348	5851	0.5115	5388	-0.4346	7056	0.5614	5937	0.3967	3944	0.4545	4810	0.7968	271	0.1103	1295	-0.5903	8635	0.6581	6952	-0.6271	9143	0.7023	7436	-0.3876	6680	0.5385	5736	0.7428	569	0.1746	1861
CERS4	0.5922	1717	0.1643	1899	0.5587	2776	0.2651	2848	-0.413	6811	0.6389	6732	0.6146	1526	0.1522	1667	0.6497	1357	0.123	1428	-0.5677	8358	0.7838	8245	-0.5855	8681	0.8096	8540	0.4807	3397	0.3247	3483	0.8313	154	0.0151	188
CCDC69	0.5921	1718	0.1644	1901	-0.2917	5563	0.5259	5549	0.3793	4336	0.4171	4430	0.4983	2804	0.2713	2877	0.8002	259	0.0216	277	0.7711	281	0.0283	332	0.4159	3557	0.3493	3660	0.4804	3403	0.325	3488	-0.5961	8640	0.8007	8520
MLNR	0.5921	1719	0.1644	1900	-0.4778	7193	0.6663	7096	0.3723	4405	0.4249	4504	0.3961	3952	0.3836	4081	-0.3256	5801	0.5443	5762	0.6048	1509	0.1444	1613	0.7118	743	0.0643	785	0.3659	4683	0.448	4779	0.5195	2747	0.2673	2812
VAMP7	0.592	1720	0.124	1380	0.645	1862	0.1513	1621	0.2409	5314	0.5009	5291	0.6301	1336	0.0995	1028	0.859	82	0.0014	31	0.6506	1071	0.0693	777	-0.2579	5244	0.4989	5252	0.5194	2972	0.2423	2631	-0.3516	6001	0.5715	6106
ATP6V1E2	0.5919	1721	0.1241	1381	0.6045	2283	0.1893	2028	0.5231	2676	0.2158	2330	0.6147	1522	0.1115	1182	-0.3782	6327	0.6114	6484	0.4023	3639	0.3136	3362	-0.3541	5932	0.578	6082	-0.4079	6903	0.6735	7151	0.7154	776	0.0451	521
IL3	0.5918	1722	0.1646	1902	-0.4254	6679	0.6244	6673	0.5495	2426	0.2338	2496	-0.3383	5909	0.5541	5870	0.3889	4086	0.3956	4199	0.415	3483	0.3361	3621	0.5428	2203	0.2163	2328	0.5262	2890	0.2761	2991	-0.7657	10158	0.9517	10128
ATP5S	0.5918	1723	0.1647	1904	0.5977	2356	0.2283	2440	-0.5051	7853	0.7346	7740	0.6773	935	0.0933	972	0.3498	4508	0.4348	4618	0.5768	1778	0.1726	1906	-0.6773	9647	0.9062	9586	-0.6121	9044	0.8457	8972	0.577	2101	0.2082	2224
PGRMC2	0.5916	1724	0.1244	1387	0.7574	808	0.0566	608	-0.4608	7356	0.7296	7683	0.7076	690	0.0408	436	-0.5029	7747	0.7678	8073	0.3895	3799	0.3289	3538	0.5794	1878	0.1373	1554	0.8906	51	0.0006	12	-0.6956	9638	0.9337	9931
ENO1	0.5915	1725	0.2327	2554	-0.3962	6382	0.5653	6008	0.5169	2755	0.3284	3502	0.5786	1934	0.2581	2742	-0.6278	9094	0.7895	8309	-0.4097	6465	0.5594	5931	0.8744	50	0.0111	153	0.6648	1282	0.1836	2008	0.3859	4194	0.429	4540
RHOD	0.5915	1726	0.2328	2555	0.3478	4765	0.464	4931	-0.4549	7293	0.6309	6654	0.5112	2663	0.3164	3349	-0.3059	5641	0.5109	5411	0.9005	23	0.0049	58	-0.572	8525	0.7242	7658	-0.3212	6063	0.5336	5680	0.596	1904	0.2536	2691
ARL3	0.5915	1727	0.1244	1384	0.6575	1734	0.1403	1505	-0.5442	8284	0.8199	8650	0.3061	4850	0.4498	4739	0.6038	1806	0.1264	1466	0.501	2470	0.1984	2151	0.646	1268	0.0805	954	0.7955	287	0.0119	118	-0.2813	5461	0.5167	5514
RNF20	0.5914	1728	0.1244	1386	0.416	4158	0.374	4005	-0.5096	7907	0.7842	8259	0.4251	3620	0.3167	3352	0.7192	715	0.0366	416	0.3895	3798	0.3289	3537	0.4707	2957	0.2505	2667	0.5408	2704	0.2173	2364	0.4189	3831	0.3358	3588
RHBDD1	0.5914	1729	0.1651	1906	-0.4625	7032	0.6543	6970	0.4867	3061	0.3003	3165	0.5819	1906	0.1851	2028	0.7532	459	0.044	501	0.3356	4362	0.4204	4483	0.4895	2759	0.2694	2836	0.5897	2118	0.2054	2258	-0.368	6151	0.5735	6132
GSTM1	0.5913	1730	0.3111	3334	0.7367	975	0.1991	2117	0.8499	112	0.0637	749	0.6841	876	0.2305	2471	-0.6847	9688	0.7668	8058	-0.6689	9505	0.7479	7840	0.7311	578	0.1774	1946	0.9627	5	0.0047	45	-0.4017	6512	0.5364	5722
GLRX3	0.5912	1731	0.1244	1385	-0.5499	7873	0.7629	8120	0.3736	4389	0.3944	4217	-0.3923	6501	0.6323	6722	0.5271	2582	0.2024	2243	0.4408	3158	0.2665	2842	0.462	3039	0.2606	2751	0.3593	4763	0.4333	4622	0.229	5224	0.4866	5172
MDH2	0.5912	1732	0.1244	1383	0.6801	1529	0.1202	1301	0.4789	3143	0.2682	2853	0.6849	867	0.0546	570	0.5363	2486	0.1919	2130	0.3293	4417	0.4008	4262	0.5522	2106	0.1603	1792	-0.6641	9546	0.9318	9892	-0.6224	8889	0.87	9236
CSF3	0.5909	1733	0.1247	1388	0.417	4146	0.3732	3994	-0.6587	9520	0.9268	9853	0.6484	1182	0.0819	885	0.3441	4562	0.4175	4426	0.5799	1742	0.1259	1380	0.4328	3361	0.2948	3105	0.639	1564	0.1112	1223	-0.5402	8006	0.7835	8350
MBOAT2	0.5909	1734	0.2332	2558	-0.4987	7374	0.6369	6790	-0.4372	7087	0.6142	6479	-0.4269	6923	0.5932	6281	0.6784	1065	0.1487	1687	0.6537	1045	0.1597	1770	0.3773	4034	0.426	4464	-0.7021	9858	0.8682	9217	0.5521	2407	0.295	3124
RAMP1	0.5909	1735	0.1654	1909	0.4951	3405	0.3217	3460	-0.3448	6087	0.5745	6071	0.8635	66	0.0055	63	0.4295	3684	0.3492	3770	-0.2959	5323	0.5021	5337	0.6459	1269	0.118	1331	0.5294	2855	0.273	2963	0.6095	1744	0.1749	1866
P4HTM	0.5908	1736	0.1655	1910	-0.4093	6518	0.6101	6489	0.7017	848	0.077	910	0.7324	517	0.0526	547	-0.566	8416	0.7895	8310	0.5443	2091	0.2017	2181	-0.6323	9194	0.8608	9105	0.5112	3052	0.2924	3158	0.5551	2378	0.2314	2471
LRRC59	0.5907	1737	0.1655	1911	0.715	1180	0.116	1254	0.6252	1614	0.1508	1670	0.6983	758	0.076	829	-0.6224	9041	0.8517	8971	-0.4614	7084	0.66	6972	0.6827	972	0.0859	1016	0.6073	1909	0.1851	2023	-0.4342	6888	0.6373	6819
RXFP4	0.5906	1738	0.125	1392	0.3996	4305	0.3907	4172	-0.4692	7441	0.7386	7789	0.665	1035	0.0703	753	0.5689	2162	0.1586	1784	0.3667	4059	0.3572	3839	0.5096	2541	0.2045	2204	-0.5271	8153	0.8054	8509	0.5842	2025	0.1597	1695
CPVL	0.5905	1739	0.1251	1393	0.6409	1912	0.1541	1663	0.3971	4124	0.3683	3923	0.6859	852	0.0541	564	0.4121	3846	0.3382	3652	0.4325	3252	0.2761	2955	0.5463	2165	0.1659	1846	0.4447	3785	0.333	3580	0.3971	4053	0.3626	3848
AOAH	0.5902	1740	0.1663	1920	0.3569	4688	0.4447	4742	0.687	980	0.0892	1052	0.6952	782	0.0782	843	0.5252	2610	0.2495	2700	0.5185	2325	0.2266	2422	0.47	2965	0.2901	3045	0.5358	2783	0.2671	2903	-0.5131	7720	0.7136	7626
SGTA	0.5901	1741	0.1253	1394	0.5719	2621	0.2215	2336	0.7285	635	0.0325	389	0.3603	4355	0.3933	4186	0.8536	93	0.0015	35	0.468	2835	0.237	2528	0.3625	4187	0.3791	3973	0.4648	3568	0.3084	3309	-0.4315	6861	0.6602	7076
MTA3	0.5901	1742	0.2338	2561	-0.4145	6567	0.5779	6149	-0.6553	9474	0.8221	8662	0.7279	549	0.0982	1020	0.9631	5	0.0004	11	0.5263	2250	0.2831	3031	-0.7212	9999	0.8907	9411	-0.3733	6550	0.5692	6063	0.6322	1521	0.2141	2289
DNAJB5	0.5899	1743	0.1257	1397	0.5525	2848	0.2411	2604	0.705	818	0.0447	536	0.3503	4464	0.4061	4316	0.3916	4058	0.3635	3895	0.4505	3031	0.2549	2717	-0.4162	6673	0.6552	6948	-0.5859	8750	0.8618	9138	0.7074	823	0.0502	568
GDPD5	0.5898	1744	0.1258	1398	0.8214	415	0.0254	290	-0.485	7621	0.7561	7958	0.6994	750	0.0457	485	-0.6177	8989	0.8893	9379	0.6769	839	0.0522	588	0.5256	2392	0.19	2073	0.2945	5294	0.4892	5245	0.5292	2638	0.2156	2311
LHX3	0.5897	1745	0.1667	1921	-0.7292	9617	0.9006	9562	0.6319	1561	0.1424	1610	0.4016	3897	0.3759	4004	0.6025	1820	0.1704	1902	0.2913	4745	0.4541	4836	-0.44	6968	0.649	6873	-0.3344	6157	0.5768	6144	0.4835	3112	0.3027	3216
TCF7L2	0.5896	1746	0.1259	1399	-0.7333	9638	0.9281	9871	0.6198	1679	0.1155	1340	0.288	4983	0.4618	4882	0.7414	535	0.0253	309	0.6515	1064	0.0685	770	0.6319	1397	0.0928	1084	-0.2443	5630	0.5326	5670	0.7894	334	0.0139	169
PCBP2	0.5893	1747	0.1669	1926	0.645	1861	0.1802	1938	0.3537	4593	0.4429	4699	0.3075	4838	0.4662	4949	0.6225	1629	0.1489	1690	0.23	5004	0.4767	5069	0.6429	1286	0.121	1363	0.687	1059	0.1019	1107	0.7333	632	0.0635	707
SELP	0.5893	1748	0.1669	1925	0.6859	1467	0.143	1535	0.4108	3943	0.3824	4070	-0.2732	5428	0.5145	5446	-0.2309	5308	0.5049	5333	0.4047	3612	0.3463	3729	-0.37	6100	0.5774	6075	-0.4045	6868	0.6385	6804	0.7029	856	0.0843	895
C19orf43	0.5893	1749	0.2345	2572	0.3206	4950	0.4776	5083	0.6372	1496	0.2011	2197	0.4498	3319	0.3661	3900	-0.6518	9352	0.8155	8574	0.6697	917	0.1434	1601	0.8143	181	0.0363	460	-0.4778	7652	0.6539	6938	0.3533	4488	0.4513	4787
PRPF4B	0.5892	1750	0.1261	1402	-0.5847	8206	0.799	8485	0.6945	917	0.0513	615	0.5763	1952	0.1466	1603	-0.2925	5560	0.5322	5645	-0.3283	5563	0.5336	5663	0.6995	817	0.0444	539	-0.5888	8788	0.8642	9174	0.5688	2218	0.174	1852
FBXL19	0.589	1751	0.167	1928	-0.5244	7629	0.7072	7513	-0.8678	10604	0.9958	10603	0.7759	299	0.0293	339	0.5168	2696	0.2583	2786	0.6302	1275	0.1238	1356	0.7163	700	0.0614	745	0.6005	1985	0.1935	2120	-0.3758	6241	0.5816	6215
CALCA	0.589	1752	0.1671	1929	0.9521	33	0.0012	26	-0.4626	7373	0.6901	7267	0.5472	2261	0.2214	2384	-0.3691	6235	0.5842	6170	0.7735	265	0.0277	325	0.4364	3311	0.3281	3427	0.6561	1365	0.1332	1449	0.5723	2172	0.2125	2274
SUCNR1	0.5888	1753	0.1268	1406	0.5001	3358	0.2915	3129	0.4659	3289	0.2836	3000	0.4062	3840	0.3397	3606	-0.4031	6612	0.6448	6828	0.3278	4430	0.4023	4278	0.3174	4632	0.4298	4511	0.3702	4631	0.4199	4498	-0.5859	8525	0.8327	8847
SDR16C5	0.5888	1754	0.1269	1408	0.3504	4742	0.4349	4639	0.3435	4692	0.429	4548	0.5528	2197	0.1683	1839	0.622	1631	0.1102	1294	0.3784	3937	0.3433	3696	-0.343	5823	0.565	5947	-0.4645	7500	0.7408	7831	0.4242	3771	0.3294	3527
PPP2R2A	0.5888	1755	0.1269	1407	-0.5453	7825	0.7583	8068	0.3371	4760	0.435	4625	0.6484	1181	0.0819	883	0.7333	592	0.0296	347	-0.3483	5764	0.5548	5894	0.7148	716	0.0359	448	-0.3467	6276	0.6008	6423	0.4493	3501	0.3031	3225
RGS16	0.5886	1756	0.1675	1934	-0.33	5809	0.5471	5771	0.712	767	0.071	829	0.5868	1855	0.181	1979	-0.6709	9553	0.8979	9474	-0.3635	5927	0.5539	5883	0.4715	2953	0.289	3033	0.3401	4930	0.4695	5016	0.3775	4275	0.4106	4342
PRRG2	0.5882	1757	0.1681	1937	-0.4387	6790	0.6348	6761	-0.319	5869	0.552	5845	-0.6064	8950	0.8378	8860	0.3139	4820	0.4632	4905	0.4767	2728	0.2671	2848	0.5834	1833	0.1774	1949	0.696	979	0.0929	1020	0.7111	799	0.0788	843
SERPINB10	0.5882	1758	0.1682	1938	-0.6189	8543	0.7994	8491	-0.4202	6896	0.6468	6823	0.6565	1111	0.1117	1185	0.5978	1867	0.1751	1968	-0.3971	6302	0.5904	6256	0.6794	999	0.0886	1044	-0.5978	8899	0.8318	8834	0.6991	889	0.0872	928
TRHDE	0.5882	1759	0.1271	1409	0.6018	2310	0.192	2052	0.5599	2304	0.1735	1915	-0.3351	5885	0.5658	5994	-0.3002	5602	0.537	5695	-0.5302	7890	0.786	8273	0.688	921	0.0511	613	0.2113	5569	0.5223	5570	0.4314	3682	0.3234	3456
PDE4B	0.5881	1760	0.1683	1939	0.5827	2509	0.2428	2622	-0.3387	6041	0.569	6017	-0.476	7478	0.693	7373	0.7177	731	0.0652	763	0.4122	3523	0.339	3661	0.6315	1403	0.1303	1462	0.7405	618	0.0594	663	0.4301	3702	0.3548	3764
OR11A1	0.588	1761	0.1684	1942	-0.5786	8147	0.7593	8082	0.7126	761	0.0704	824	0.6025	1660	0.1659	1814	-0.3225	5779	0.5421	5747	0.3192	4525	0.4344	4629	0.7308	582	0.0521	639	-0.6832	9710	0.9099	9651	-0.892	10611	0.9962	10619
GUCA2B	0.588	1762	0.2359	2584	0.7019	1311	0.1708	1849	-0.7092	9942	0.8766	9250	0.4669	3124	0.3514	3732	0.74	545	0.0903	1052	0.4791	2708	0.3239	3473	-0.5034	7691	0.6478	6862	-0.3434	6241	0.5467	5817	-0.4015	6511	0.5702	6087
NUDT14	0.5879	1763	0.1685	1945	-0.6768	9139	0.8551	9052	0.3749	4379	0.4218	4487	-0.3758	6300	0.5911	6255	0.3864	4125	0.3992	4237	-0.4307	6720	0.6248	6644	0.7124	735	0.064	782	-0.5184	8060	0.7509	7931	-0.4421	6960	0.644	6892
ZNF419	0.5879	1764	0.236	2585	0.6336	1988	0.2404	2597	-0.3042	5747	0.5186	5456	0.5013	2764	0.3235	3441	0.7018	866	0.1258	1463	-0.5857	8574	0.7334	7714	-0.5515	8250	0.7017	7431	-0.4076	6901	0.5939	6337	0.3258	4731	0.4667	4970
SDC1	0.5878	1765	0.1687	1947	-0.3121	5671	0.5356	5661	-0.5485	8318	0.7791	8186	-0.8454	10563	0.9938	10584	0.4916	2944	0.2848	3057	0.6551	1036	0.1017	1151	-0.8296	10524	0.9904	10525	0.3794	4502	0.4353	4645	0.425	3759	0.3593	3805
GPR150	0.5876	1766	0.1691	1952	0.7286	1042	0.1041	1107	0.4426	3567	0.346	3678	0.4872	2896	0.284	3003	-0.2432	5339	0.5078	5365	-0.6366	9164	0.8609	9081	-0.2987	5465	0.5184	5458	0.7286	708	0.068	759	0.3651	4389	0.4223	4473
GPRC5B	0.5874	1767	0.1693	1954	-0.3693	6122	0.5767	6137	0.3526	4607	0.443	4704	0.5616	2108	0.2065	2240	-0.4277	6892	0.6432	6813	-0.4424	6855	0.639	6762	0.5923	1755	0.1688	1865	0.7936	296	0.028	311	0.5745	2141	0.2102	2251
MEFV	0.5874	1768	0.1278	1415	-0.6658	9036	0.8784	9316	0.4166	3873	0.3443	3667	0.3618	4340	0.3922	4171	0.3538	4469	0.4065	4302	0.6453	1117	0.0731	826	0.511	2523	0.2034	2194	-0.5144	8018	0.7929	8376	0.4089	3926	0.3491	3699
HSD11B1	0.5873	1769	0.1694	1955	0.7411	948	0.0942	994	0.5492	2427	0.2341	2501	-0.3888	6463	0.6035	6409	0.3394	4622	0.4439	4706	0.4471	3074	0.2996	3232	0.8032	211	0.0195	259	-0.3407	6216	0.5814	6198	0.2965	4954	0.4718	5034
MPP3	0.5872	1770	0.1695	1956	0.8872	165	0.0144	180	0.6392	1476	0.1356	1534	-0.735	10123	0.9492	10074	-0.5946	8737	0.8201	8631	0.6438	1136	0.1108	1223	0.5707	1961	0.1899	2069	0.742	608	0.0582	648	0.5171	2766	0.2701	2850
NRP2	0.587	1771	0.1279	1416	-0.6938	9304	0.9001	9554	0.2963	5064	0.4703	4986	0.441	3424	0.2962	3146	0.5703	2146	0.1574	1770	0.6406	1165	0.0768	871	0.6229	1464	0.101	1158	0.4083	4200	0.3763	4057	0.7226	712	0.0413	478
TUSC2	0.587	1772	0.1697	1958	-0.3913	6331	0.595	6320	-0.4467	7199	0.6721	7081	0.4979	2805	0.2717	2878	-0.5852	8631	0.8108	8530	-0.435	6770	0.6303	6684	0.7616	401	0.0361	450	-0.6842	9724	0.9108	9658	-0.4361	6906	0.6393	6836
FASLG	0.5868	1773	0.1697	1959	-0.3558	6022	0.5663	6015	-0.2819	5596	0.5303	5600	0.5529	2195	0.2155	2332	0.6583	1261	0.1146	1341	0.5858	1666	0.1633	1806	0.5796	1872	0.181	1982	-0.3501	6308	0.5901	6296	0.6664	1176	0.1168	1226
CDH6	0.5868	1774	0.1697	1960	-0.6322	8675	0.812	8616	-0.5399	8229	0.7707	8105	0.5774	1945	0.191	2081	-0.8493	10577	0.994	10575	0.8786	40	0.0032	39	0.2832	4900	0.4739	4979	-0.235	5609	0.5297	5651	-0.3733	6205	0.5792	6184
ABAT	0.5867	1775	0.1698	1961	-0.3894	6312	0.5933	6302	0.5284	2634	0.2572	2743	0.6051	1624	0.1634	1790	0.5325	2520	0.2418	2611	-0.4797	7302	0.6799	7170	0.6409	1305	0.123	1381	0.7088	862	0.0816	905	-0.3448	5928	0.5521	5891
PCDHGB6	0.5866	1776	0.1282	1417	-0.5366	7748	0.7498	7982	0.7034	832	0.0457	547	-0.6509	9415	0.9218	9753	0.6829	1031	0.0589	695	0.4035	3629	0.3121	3347	0.5253	2393	0.1904	2077	0.3675	4663	0.4232	4529	0.4598	3387	0.2923	3094
STX2	0.5864	1777	0.1283	1418	0.2635	5245	0.4909	5213	0.3637	4489	0.4054	4322	0.6015	1671	0.1235	1314	-0.3829	6368	0.6183	6544	0.3238	4475	0.4064	4324	0.3399	4408	0.4079	4249	0.4337	3922	0.3469	3736	-0.4843	7451	0.7222	7723
CYC1	0.5859	1778	0.129	1424	-0.4571	6985	0.6757	7178	0.6572	1303	0.0815	973	0.7412	470	0.0241	270	-0.4189	6778	0.6657	7038	0.3844	3865	0.3354	3612	0.7735	340	0.0132	176	-0.5328	8210	0.8099	8558	0.5182	2755	0.2281	2435
HABP2	0.5857	1779	0.1291	1428	-0.6088	8450	0.8235	8730	0.6855	999	0.0582	688	0.6167	1501	0.1105	1166	-0.2417	5335	0.5056	5342	-0.2159	5051	0.4682	4992	0.4629	3028	0.2598	2743	0.3925	4371	0.396	4223	0.6165	1667	0.1278	1352
SAP30L	0.5855	1780	0.1291	1426	0.4035	4274	0.3879	4138	-0.333	5990	0.5773	6106	0.5747	1972	0.1484	1623	0.6036	1808	0.1265	1467	0.3879	3814	0.3312	3562	0.5918	1758	0.1265	1425	-0.5778	8669	0.8539	9053	0.3986	4034	0.3613	3829
NR6A1	0.5855	1781	0.171	1969	0.5975	2359	0.2285	2443	0.4758	3184	0.3103	3291	-0.4118	6720	0.6269	6655	0.3566	4442	0.4297	4557	0.5035	2450	0.241	2576	0.8028	214	0.0195	257	0.7861	338	0.0315	351	0.5034	2921	0.2839	3008
ZNF740	0.5853	1782	0.1713	1973	-0.3967	6388	0.5994	6379	0.3224	4873	0.4684	4963	-0.4521	7212	0.6683	7134	0.703	852	0.0758	890	0.785	226	0.0232	275	0.562	2034	0.1985	2148	0.3042	5224	0.4967	5313	-0.6462	9139	0.8552	9063
TG	0.5852	1783	0.1713	1972	0.3491	4751	0.4504	4797	0.5817	2059	0.1971	2145	0.6038	1640	0.1644	1801	-0.5532	8270	0.776	8165	0.6099	1473	0.1401	1561	0.7832	291	0.0261	320	-0.6672	9578	0.8963	9519	-0.3774	6258	0.5839	6233
DOCK4	0.5852	1784	0.1713	1974	-0.3691	6120	0.5767	6141	-0.474	7499	0.7014	7376	-0.3193	5748	0.5393	5714	0.8171	197	0.0151	202	0.4314	3270	0.3177	3407	-0.409	6578	0.6156	6480	0.4283	3990	0.381	4090	0.4388	3600	0.3475	3678
IL26	0.5851	1785	0.1293	1431	-0.2132	5341	0.5061	5338	0.6962	908	0.05	605	0.89	37	0.0003	8	0.2125	5260	0.495	5241	-0.4345	6763	0.6634	7008	0.3843	3954	0.3545	3704	0.8399	125	0.0041	40	0.4992	2961	0.2479	2637
KDELR3	0.585	1786	0.1294	1433	-0.5632	7989	0.7764	8255	0.351	4624	0.4214	4478	0.5246	2522	0.1991	2171	0.6155	1680	0.1146	1342	0.6152	1427	0.0976	1097	-0.6007	8853	0.8717	9236	-0.3448	6257	0.5988	6403	0.6003	1866	0.1438	1535
ABCC10	0.585	1787	0.1714	1976	0.3711	4570	0.4341	4628	0.4124	3915	0.3807	4051	0.4255	3615	0.3479	3699	0.4461	3465	0.3328	3604	0.4085	3560	0.3429	3692	0.5642	2017	0.1961	2130	0.6386	1570	0.1511	1645	-0.4444	6988	0.6461	6916
ZNF223	0.5849	1788	0.1295	1435	-0.3859	6283	0.6042	6429	-0.39	6541	0.641	6756	0.7739	309	0.0134	158	0.5964	1881	0.1325	1527	0.5559	1968	0.1459	1630	0.7735	339	0.0132	180	0.4071	4218	0.378	4071	0.8367	131	0.005	44
DPM3	0.5849	1789	0.2388	2618	0.5455	2924	0.322	3467	0.7297	625	0.1009	1170	0.4571	3245	0.3598	3839	0.6245	1609	0.2129	2347	-0.4852	7359	0.6241	6633	-0.3863	6282	0.5505	5786	-0.7806	10359	0.9379	9958	0.6217	1623	0.2262	2425
HMGCL	0.5848	1790	0.1295	1434	-0.6066	8431	0.8216	8714	-0.2752	5563	0.5332	5630	0.3667	4284	0.3859	4111	0.6386	1462	0.0953	1109	0.451	3029	0.2546	2714	0.4332	3357	0.2944	3098	-0.5494	8403	0.8255	8771	0.4155	3857	0.3418	3631
ZNF222	0.5847	1791	0.1297	1439	-0.2503	5395	0.513	5410	-0.6248	9137	0.8982	9516	0.4232	3638	0.319	3379	0.8566	87	0.0014	34	0.6338	1234	0.0829	931	0.2709	4963	0.4643	4873	0.4446	3787	0.3332	3582	-0.388	6368	0.611	6500
AP2M1	0.5846	1792	0.1297	1438	-0.5303	7684	0.7445	7924	0.3624	4500	0.4071	4338	0.4932	2842	0.2359	2527	-0.5554	8294	0.822	8656	-0.3715	6013	0.5826	6175	0.798	229	0.0074	103	-0.5933	8840	0.8691	9230	0.5547	2380	0.1881	2038
CUBN	0.5845	1793	0.1298	1441	-0.4556	6967	0.6741	7167	0.7712	368	0.0151	185	0.5087	2695	0.2179	2352	-0.5242	7977	0.7918	8327	0.3761	3955	0.3465	3732	0.5484	2144	0.1638	1824	0.4127	4151	0.3722	4012	0.7685	431	0.0207	257
SLC25A25	0.5843	1794	0.1719	1979	-0.3814	6234	0.5875	6242	0.5772	2119	0.201	2194	0.2874	4986	0.4796	5077	-0.4831	7527	0.6991	7397	0.5646	1885	0.1836	2006	0.4626	3031	0.2967	3119	-0.5785	8679	0.8123	8597	0.5139	2804	0.2735	2895
RICTOR	0.5843	1795	0.1719	1977	0.8948	140	0.0127	155	-0.6074	8930	0.8411	8869	0.7293	538	0.0551	584	-0.3737	6284	0.5893	6236	-0.5299	7884	0.7371	7750	0.5466	2161	0.2127	2284	-0.317	6016	0.5621	5989	-0.5657	8301	0.7693	8195
PRPSAP1	0.5843	1796	0.1719	1978	0.3435	4800	0.4536	4847	0.3407	4715	0.4541	4807	0.7905	251	0.0242	274	-0.4633	7308	0.6793	7172	0.6838	786	0.0773	876	-0.4944	7583	0.705	7458	0.5449	2656	0.2563	2788	0.4819	3131	0.3035	3230
CYP4F12	0.5841	1797	0.1721	1981	0.8699	204	0.0204	235	-0.5206	8028	0.7503	7901	0.651	1154	0.1172	1245	0.7558	449	0.0426	485	0.6318	1258	0.122	1335	0.7162	702	0.0615	747	0.6033	1952	0.1896	2080	-0.4273	6811	0.6312	6758
ENTPD7	0.5841	1798	0.1722	1982	0.5613	2750	0.2625	2821	0.5106	2799	0.2751	2919	-0.2431	5315	0.5054	5342	-0.2299	5305	0.5049	5334	0.5143	2363	0.231	2465	0.3964	3817	0.373	3914	-0.4721	7591	0.7051	7494	0.4361	3637	0.3498	3708
TF	0.584	1799	0.1304	1447	0.7484	881	0.0638	671	0.7406	545	0.0262	314	-0.704	9885	0.958	10181	-0.4861	7550	0.7484	7882	0.4615	2918	0.2432	2598	0.3936	3844	0.344	3593	-0.4122	6946	0.6781	7198	-0.473	7324	0.7095	7587
GRK6	0.5836	1800	0.2398	2627	-0.6427	8803	0.7734	8226	0.4543	3420	0.3778	4028	0.7739	310	0.0608	648	-0.5717	8472	0.7266	7677	0.6962	696	0.1191	1297	-0.5694	8490	0.7217	7628	-0.4554	7400	0.6343	6762	0.6785	1076	0.159	1684
CDH8	0.5834	1801	0.1306	1450	0.4494	3829	0.3403	3663	0.5962	1914	0.1392	1573	0.4654	3144	0.267	2832	0.4309	3658	0.3159	3420	0.4988	2496	0.2018	2183	0.6779	1016	0.0582	705	-0.7115	9936	0.9586	10207	0.4207	3809	0.3334	3560
PTHLH	0.5831	1802	0.1311	1452	0.3275	4895	0.4528	4829	0.6783	1072	0.0632	741	-0.3598	6128	0.5929	6280	-0.3715	6266	0.6044	6413	-0.321	5513	0.5266	5607	0.5163	2473	0.1988	2151	-0.2693	5712	0.5436	5786	-0.6664	9361	0.9117	9697
BRDT	0.5831	1803	0.3174	3395	0.6153	2168	0.3187	3426	0.6887	966	0.2294	2456	-0.6884	9756	0.7734	8164	-0.35	6033	0.5135	5431	0.5444	2089	0.3468	3735	0.7041	785	0.2051	2212	-0.6108	9029	0.6931	7360	0.6308	1530	0.2939	3107
RGS17	0.5831	1804	0.1313	1454	-0.4046	6478	0.6213	6638	-0.4792	7563	0.7504	7903	0.6854	859	0.0544	568	-0.3939	6511	0.6342	6710	0.6599	986	0.0632	709	0.7195	675	0.0332	414	-0.3036	5912	0.5657	6032	0.6617	1227	0.0868	922
EFEMP1	0.583	1805	0.1313	1455	-0.4597	7002	0.6786	7201	-0.5819	8662	0.8565	9024	0.5711	2024	0.1522	1672	0.4144	3820	0.3343	3618	0.5129	2377	0.187	2032	0.3849	3948	0.3532	3695	0.5961	2044	0.1546	1680	0.6567	1284	0.0905	971
CLDN4	0.5828	1806	0.1313	1458	0.5782	2560	0.2149	2268	0.5824	2049	0.1519	1684	0.6753	950	0.0623	662	-0.6372	9213	0.9081	9619	0.7128	605	0.0314	386	0.5875	1789	0.13	1458	0.3144	5164	0.4754	5084	0.5643	2272	0.1784	1914
ITPKA	0.5827	1807	0.1314	1459	0.5385	2994	0.256	2752	0.6501	1367	0.087	1027	0.6714	984	0.066	700	0.4614	3269	0.2785	2982	0.6486	1092	0.0708	799	-0.8143	10485	0.9962	10596	-0.6197	9120	0.8949	9496	-0.5313	7917	0.7738	8241
F2RL3	0.5826	1808	0.3177	3400	-0.812	10197	0.8857	9386	-0.5889	8726	0.6744	7104	0.5075	2705	0.3835	4077	0.9718	2	0.002	41	0.8566	72	0.0545	628	-0.6318	9185	0.7077	7486	0.5369	2770	0.3838	4111	-0.6024	8691	0.6754	7227
[truncated: 8,862 more rows]
